# Supplementary material for: Inhibition of autophagy-lysosomal function exacerbates microglial and monocyte lipid metabolism reprograming and dysfunction after brain injury
Source: bioRxiv preprint, doi:10.1101/2025.09.04.674092, version 1 (2025-09-08)
Supplement: Table_S3 [file 674092_file06.xlsx]

## Sheet: TBI_vs_SHAM_DEGs
Table S3. Diffrentially expressed genes (DEGs) in CD11B+ monocytes from TBI (day 3) vs sham brain.
p_val	avg_log2FC	pct.1	pct.2	p_val_adj	log10_pval	log10_padj	gene
0	10.8121	0.961	0.008	1.18949e-304	308.303	303.925	Spp1
0	8.35964	0.83	0.029	1.18949e-304	308.303	303.925	Fabp5
0	5.14792	0.735	0.055	1.18949e-304	308.303	303.925	Lgals1
0	5.45188	0.708	0.048	1.18949e-304	308.303	303.925	Lgals3
0	3.70117	0.752	0.129	1.18949e-304	308.303	303.925	Ifi27l2a
0	3.56421	0.656	0.059	1.18949e-304	308.303	303.925	Wfdc17
0	3.60459	0.673	0.08	1.18949e-304	308.303	303.925	Fxyd5
0	5.52949	0.708	0.122	1.18949e-304	308.303	303.925	Hmox1
0	3.06324	0.63	0.076	1.18949e-304	308.303	303.925	Ifitm2
0	2.94198	0.69	0.14	1.18949e-304	308.303	303.925	Ifitm3
0	4.26506	0.589	0.047	1.18949e-304	308.303	303.925	Vim
0	3.44372	0.693	0.151	1.18949e-304	308.303	303.925	Emp3
0	4.22688	0.677	0.139	1.18949e-304	308.303	303.925	Plin2
0	6.32288	0.539	0.015	1.18949e-304	308.303	303.925	Apoc2
0	3.72516	0.789	0.273	1.18949e-304	308.303	303.925	Cstb
0	3.21485	0.566	0.05	1.18949e-304	308.303	303.925	Pf4
0	3.66975	0.546	0.042	1.18949e-304	308.303	303.925	Lilrb4a
0	3.62923	0.978	0.474	1.18949e-304	308.303	303.925	Lyz2
0	2.97356	0.777	0.273	1.18949e-304	308.303	303.925	Tspo
0	3.20346	0.642	0.15	1.18949e-304	308.303	303.925	Anxa5
0	2.96646	0.751	0.262	1.18949e-304	308.303	303.925	Txn1
0	3.73496	0.579	0.102	1.18949e-304	308.303	303.925	Capg
0	3.7932	0.512	0.035	1.18949e-304	308.303	303.925	Anxa2
0	3.38707	0.997	0.523	1.18949e-304	308.303	303.925	Apoe
0	2.58423	0.791	0.318	1.18949e-304	308.303	303.925	Mt1
0	13.1297	0.464	0	1.18949e-304	308.303	303.925	Gpnmb
0	2.39793	0.684	0.222	1.18949e-304	308.303	303.925	Selenow
0	2.74608	0.811	0.349	1.18949e-304	308.303	303.925	Ifi30
0	2.86622	0.551	0.09	1.18949e-304	308.303	303.925	Iqgap1
0	3.18572	0.571	0.112	1.18949e-304	308.303	303.925	Ftl1-ps1
0	2.04506	0.598	0.139	1.18949e-304	308.303	303.925	Dab2
0	3.10238	0.495	0.041	1.18949e-304	308.303	303.925	Ifi207
0	2.63807	0.772	0.319	1.18949e-304	308.303	303.925	Mif
0	2.57172	0.684	0.232	1.18949e-304	308.303	303.925	Nme1
0	2.74991	0.546	0.094	1.18949e-304	308.303	303.925	Crip1
0	2.33014	0.694	0.242	1.18949e-304	308.303	303.925	Bola2
0	3.09821	0.567	0.116	1.18949e-304	308.303	303.925	Msrb1
0	2.90184	0.588	0.14	1.18949e-304	308.303	303.925	Tagln2
0	2.17756	0.791	0.345	1.18949e-304	308.303	303.925	Gm10076
0	2.24768	0.684	0.239	1.18949e-304	308.303	303.925	Calm3
0	2.50216	0.535	0.091	1.18949e-304	308.303	303.925	Sh3bgrl
0	2.44349	0.662	0.22	1.18949e-304	308.303	303.925	Ms4a6c
0	2.87682	0.643	0.203	1.18949e-304	308.303	303.925	Aprt
0	2.92796	0.836	0.401	1.18949e-304	308.303	303.925	Prdx1
0	3.3708	0.574	0.139	1.18949e-304	308.303	303.925	Stmn1
0	2.50116	0.629	0.197	1.18949e-304	308.303	303.925	Pgk1
0	4.07275	0.462	0.031	1.18949e-304	308.303	303.925	Msr1
0	2.52092	0.69	0.26	1.18949e-304	308.303	303.925	Pgam1
0	3.51805	0.459	0.03	1.18949e-304	308.303	303.925	Ms4a7
0	1.97301	0.72	0.294	1.18949e-304	308.303	303.925	Ndufc1
0	2.01035	0.757	0.331	1.18949e-304	308.303	303.925	Atp5k
0	2.24463	0.57	0.144	1.18949e-304	308.303	303.925	Tpm4
0	2.17255	0.656	0.231	1.18949e-304	308.303	303.925	Prelid1
0	2.51201	0.775	0.351	1.18949e-304	308.303	303.925	Pkm
0	2.447	0.642	0.219	1.18949e-304	308.303	303.925	Tpi1
0	2.74096	0.502	0.079	1.18949e-304	308.303	303.925	S100a11
0	1.88381	0.733	0.31	1.18949e-304	308.303	303.925	Ndufa1
0	3.84372	0.468	0.047	1.18949e-304	308.303	303.925	Tuba1c
0	2.37222	0.878	0.457	1.18949e-304	308.303	303.925	Cd52
0	2.01663	0.727	0.306	1.18949e-304	308.303	303.925	Tmem256
0	2.32115	0.698	0.277	1.18949e-304	308.303	303.925	Ldha
0	2.92661	0.536	0.117	1.18949e-304	308.303	303.925	Selenoh
0	5.08174	0.43	0.011	1.18949e-304	308.303	303.925	Fn1
0	1.96043	0.714	0.298	1.18949e-304	308.303	303.925	Anp32b
0	2.0913	0.78	0.365	1.18949e-304	308.303	303.925	Rps27l
0	2.00597	0.751	0.339	1.18949e-304	308.303	303.925	Cox5a
0	2.20937	0.594	0.187	1.18949e-304	308.303	303.925	Cxcl16
0	1.62413	0.555	0.149	1.18949e-304	308.303	303.925	Myo5a
0	2.17531	0.551	0.145	1.18949e-304	308.303	303.925	Mrpl54
0	1.70689	0.725	0.319	1.18949e-304	308.303	303.925	Dbi
0	1.96778	0.622	0.217	1.18949e-304	308.303	303.925	Lgals3bp
0	1.80067	0.78	0.375	1.18949e-304	308.303	303.925	Atp5mpl
0	1.63039	0.696	0.291	1.18949e-304	308.303	303.925	Mrpl33
0	1.87526	0.664	0.261	1.18949e-304	308.303	303.925	Ap2s1
0	2.13995	0.58	0.177	1.18949e-304	308.303	303.925	Aldh2
0	1.8435	0.744	0.341	1.18949e-304	308.303	303.925	Rbm3
0	2.77405	0.463	0.061	1.18949e-304	308.303	303.925	Ifi204
0	2.47596	0.463	0.061	1.18949e-304	308.303	303.925	S100a6
0	1.95214	0.788	0.386	1.18949e-304	308.303	303.925	Uqcrq
0	1.76249	0.668	0.266	1.18949e-304	308.303	303.925	Ndufs6
0	2.24994	0.539	0.137	1.18949e-304	308.303	303.925	Fundc2
0	1.59467	0.697	0.295	1.18949e-304	308.303	303.925	H2aj
0	1.84475	0.661	0.26	1.18949e-304	308.303	303.925	Atp5g3
0	1.76679	0.752	0.352	1.18949e-304	308.303	303.925	Smdt1
0	2.01298	0.569	0.169	1.18949e-304	308.303	303.925	Cpd
0	2.09294	0.811	0.413	1.18949e-304	308.303	303.925	Gpx1
0	1.72552	0.745	0.348	1.18949e-304	308.303	303.925	Uqcr10
0	1.75806	0.558	0.161	1.18949e-304	308.303	303.925	Slfn2
0	3.06467	0.543	0.146	1.18949e-304	308.303	303.925	Tgfbi
0	1.62856	0.632	0.236	1.18949e-304	308.303	303.925	S100a13
0	1.71539	0.644	0.249	1.18949e-304	308.303	303.925	Ndufb2
0	1.64943	0.707	0.313	1.18949e-304	308.303	303.925	Romo1
0	1.58988	0.683	0.29	1.18949e-304	308.303	303.925	Snrpd2
0	1.83549	0.75	0.357	1.18949e-304	308.303	303.925	Atp5g1
0	1.7255	0.671	0.278	1.18949e-304	308.303	303.925	Uqcc2
0	1.69112	0.736	0.343	1.18949e-304	308.303	303.925	Ndufb7
0	1.98288	0.716	0.324	1.18949e-304	308.303	303.925	Ran
0	2.19945	0.851	0.459	1.18949e-304	308.303	303.925	Actg1
0	2.99427	0.449	0.058	1.18949e-304	308.303	303.925	Mdfic
0	2.316	0.563	0.173	1.18949e-304	308.303	303.925	Ccl12
0	1.75153	0.796	0.407	1.18949e-304	308.303	303.925	Ndufb1
0	1.71984	0.743	0.354	1.18949e-304	308.303	303.925	Cox5b
0	2.9929	0.457	0.068	1.18949e-304	308.303	303.925	Nceh1
0	1.96064	0.744	0.355	1.18949e-304	308.303	303.925	Bst2
0	1.58654	0.752	0.363	1.18949e-304	308.303	303.925	Atp5md
0	1.70174	0.777	0.389	1.18949e-304	308.303	303.925	Uqcr11
0	1.52973	0.727	0.339	1.18949e-304	308.303	303.925	Snrpe
0	2.17135	0.683	0.297	1.18949e-304	308.303	303.925	Esd
0	2.42197	0.616	0.23	1.18949e-304	308.303	303.925	Hmgb2
0	1.76231	0.677	0.292	1.18949e-304	308.303	303.925	Bax
0	2.13786	0.843	0.458	1.18949e-304	308.303	303.925	Nme2
0	1.62469	0.702	0.318	1.18949e-304	308.303	303.925	Atp5o
0	1.70261	0.614	0.231	1.18949e-304	308.303	303.925	Ciao2a
0	1.73148	0.732	0.349	1.18949e-304	308.303	303.925	Ndufb8
0	1.59674	0.71	0.327	1.18949e-304	308.303	303.925	Ndufv3
0	1.55419	0.745	0.363	1.18949e-304	308.303	303.925	Cops9
0	2.63355	0.462	0.08	1.18949e-304	308.303	303.925	Rap2b
0	1.82691	0.788	0.406	1.18949e-304	308.303	303.925	Sec61b
0	1.91877	0.743	0.362	1.18949e-304	308.303	303.925	Tubb5
0	1.56495	0.648	0.267	1.18949e-304	308.303	303.925	Ndufa11
0	1.46303	0.75	0.37	1.18949e-304	308.303	303.925	Ndufa3
0	1.61042	0.656	0.276	1.18949e-304	308.303	303.925	Nap1l1
0	1.81802	0.573	0.193	1.18949e-304	308.303	303.925	Ndufb6
0	2.3278	0.868	0.489	1.18949e-304	308.303	303.925	Gapdh
0	1.98346	0.778	0.399	1.18949e-304	308.303	303.925	Aldoa
0	2.38453	0.868	0.489	1.18949e-304	308.303	303.925	Cd63
0	2.04683	0.514	0.135	1.18949e-304	308.303	303.925	Mpp1
0	1.55196	0.659	0.281	1.18949e-304	308.303	303.925	Taf10
0	1.5568	0.71	0.332	1.18949e-304	308.303	303.925	Ndufs5
0	1.66853	0.594	0.217	1.18949e-304	308.303	303.925	Lsm4
0	3.27988	0.415	0.038	1.18949e-304	308.303	303.925	Sash1
0	1.69513	0.695	0.319	1.18949e-304	308.303	303.925	Tmsb10
0	1.4569	0.701	0.325	1.18949e-304	308.303	303.925	Snrpf
0	1.51204	0.672	0.297	1.18949e-304	308.303	303.925	Tmem160
0	2.47375	0.462	0.087	1.18949e-304	308.303	303.925	Sdc3
0	1.85988	0.602	0.227	1.18949e-304	308.303	303.925	Eno1
0	1.68183	0.731	0.356	1.18949e-304	308.303	303.925	Eif5a
0	2.19522	0.501	0.127	1.18949e-304	308.303	303.925	Uap1l1
0	1.50944	0.718	0.344	1.18949e-304	308.303	303.925	Bag1
0	1.52365	0.739	0.365	1.18949e-304	308.303	303.925	Cox6a1
0	2.07995	0.521	0.147	1.18949e-304	308.303	303.925	Tceal9
0	1.46671	0.786	0.413	1.18949e-304	308.303	303.925	Tomm7
0	3.83722	0.403	0.03	1.18949e-304	308.303	303.925	Gsn
0	1.34695	0.652	0.279	1.18949e-304	308.303	303.925	Pet100
0	1.74038	0.84	0.467	1.18949e-304	308.303	303.925	Cox6c
0	1.58452	0.78	0.408	1.18949e-304	308.303	303.925	Tma7
0	1.69041	0.577	0.205	1.18949e-304	308.303	303.925	Aurkaip1
0	1.52379	0.6	0.228	1.18949e-304	308.303	303.925	Polr2f
0	1.73027	0.769	0.397	1.18949e-304	308.303	303.925	Prdx5
0	1.72389	0.803	0.432	1.18949e-304	308.303	303.925	Hint1
0	1.52502	0.678	0.307	1.18949e-304	308.303	303.925	Txndc17
0	1.47852	0.597	0.226	1.18949e-304	308.303	303.925	Mrpl30
0	2.14273	0.854	0.483	1.18949e-304	308.303	303.925	H2az1
0	1.48805	0.732	0.361	1.18949e-304	308.303	303.925	Ndufb9
0	2.69306	0.498	0.128	1.18949e-304	308.303	303.925	Prdx6
0	2.03039	0.513	0.143	1.18949e-304	308.303	303.925	Nhp2
0	2.08615	0.476	0.106	1.18949e-304	308.303	303.925	Milr1
0	1.48825	0.678	0.309	1.18949e-304	308.303	303.925	Psmb4
0	1.56579	0.614	0.245	1.18949e-304	308.303	303.925	Trappc2l
0	1.50117	0.655	0.287	1.18949e-304	308.303	303.925	Capns1
0	1.47719	0.786	0.418	1.18949e-304	308.303	303.925	Ndufa2
0	1.6869	0.572	0.204	1.18949e-304	308.303	303.925	Mrpl51
0	3.37076	0.411	0.043	1.18949e-304	308.303	303.925	Pla2g7
0	1.55611	0.687	0.32	1.18949e-304	308.303	303.925	Timm13
0	1.60453	0.779	0.412	1.18949e-304	308.303	303.925	Cox7b
0	1.52292	0.759	0.392	1.18949e-304	308.303	303.925	Rpl22l1
0	1.54273	0.597	0.23	1.18949e-304	308.303	303.925	Rex1bd
0	1.45846	0.609	0.242	1.18949e-304	308.303	303.925	Slirp
0	1.70689	0.805	0.439	1.18949e-304	308.303	303.925	Elob
0	1.8247	0.554	0.188	1.18949e-304	308.303	303.925	Banf1
0	1.5405	0.623	0.257	1.18949e-304	308.303	303.925	Cenpx
0	2.20641	0.42	0.054	1.18949e-304	308.303	303.925	Cybb
0	1.49358	0.674	0.309	1.18949e-304	308.303	303.925	Rab5if
0	1.64247	0.57	0.205	1.18949e-304	308.303	303.925	Stmp1
0	1.37935	0.633	0.268	1.18949e-304	308.303	303.925	Shisa5
0	1.39698	0.727	0.362	1.18949e-304	308.303	303.925	Atp5d
0	2.25629	0.463	0.098	1.18949e-304	308.303	303.925	Tmem106a
0	3.39582	0.393	0.028	1.18949e-304	308.303	303.925	Gm56663
0	1.5568	0.648	0.285	1.18949e-304	308.303	303.925	Psmd8
0	1.51802	0.774	0.411	1.18949e-304	308.303	303.925	Cox7a2
0	1.66331	0.684	0.321	1.18949e-304	308.303	303.925	Psmb6
0	1.69328	0.646	0.283	1.18949e-304	308.303	303.925	Ranbp1
0	1.57221	0.583	0.22	1.18949e-304	308.303	303.925	Sod1
0	1.35076	0.707	0.344	1.18949e-304	308.303	303.925	Ndufb11
0	1.50013	0.624	0.262	1.18949e-304	308.303	303.925	Mrpl20
0	1.42293	0.637	0.275	1.18949e-304	308.303	303.925	Etfb
0	1.4344	0.695	0.333	1.18949e-304	308.303	303.925	Lamtor2
0	1.66861	0.814	0.452	1.18949e-304	308.303	303.925	Atp5j2
0	1.85022	0.791	0.43	1.18949e-304	308.303	303.925	Akr1a1
0	1.27389	0.769	0.408	1.18949e-304	308.303	303.925	Snrpg
0	1.38791	0.666	0.305	1.18949e-304	308.303	303.925	Myl12a
0	1.46736	0.592	0.231	1.18949e-304	308.303	303.925	Gtf2h5
0	1.59037	0.823	0.462	1.18949e-304	308.303	303.925	Cox6b1
0	1.60234	0.825	0.464	1.18949e-304	308.303	303.925	Atp5l
0	1.39547	0.664	0.304	1.18949e-304	308.303	303.925	Prdx2
0	1.69626	0.81	0.45	1.18949e-304	308.303	303.925	Sec61g
0	3.08338	0.401	0.041	1.18949e-304	308.303	303.925	Gpr65
0	1.72702	0.552	0.192	1.18949e-304	308.303	303.925	Prdx4
0	1.38706	0.626	0.266	1.18949e-304	308.303	303.925	Eif3i
0	1.30831	0.734	0.375	1.18949e-304	308.303	303.925	Eif3k
0	1.32836	0.741	0.382	1.18949e-304	308.303	303.925	Tomm6
0	3.06383	0.401	0.043	1.18949e-304	308.303	303.925	S100a4
0	1.43352	0.643	0.285	1.18949e-304	308.303	303.925	Tle5
0	1.34058	0.659	0.301	1.18949e-304	308.303	303.925	Rac2
0	1.84418	0.829	0.471	1.18949e-304	308.303	303.925	Sem1
0	1.45535	0.803	0.446	1.18949e-304	308.303	303.925	Ubl5
0	1.62211	0.545	0.188	1.18949e-304	308.303	303.925	Rab32
0	1.63406	0.539	0.182	1.18949e-304	308.303	303.925	Mrpl57
0	1.40069	0.739	0.382	1.18949e-304	308.303	303.925	Psma7
0	1.3923	0.761	0.404	1.18949e-304	308.303	303.925	Uqcrb
0	4.02726	0.399	0.043	1.18949e-304	308.303	303.925	Lpl
0	1.26431	0.683	0.328	1.18949e-304	308.303	303.925	Abracl
0	1.41788	0.575	0.22	1.18949e-304	308.303	303.925	Timm8b
0	1.32425	0.61	0.255	1.18949e-304	308.303	303.925	Mrps24
0	1.54444	0.49	0.135	1.18949e-304	308.303	303.925	Rftn1
0	1.34102	0.694	0.339	1.18949e-304	308.303	303.925	Chmp2a
0	1.23853	0.676	0.322	1.18949e-304	308.303	303.925	Pgls
0	1.41255	0.611	0.257	1.18949e-304	308.303	303.925	Ncbp2as2
0	1.21821	0.732	0.378	1.18949e-304	308.303	303.925	Tmem258
0	1.36528	0.787	0.434	1.18949e-304	308.303	303.925	Ndufa13
0	1.2338	0.692	0.339	1.18949e-304	308.303	303.925	Ndufb5
0	1.19407	0.686	0.334	1.18949e-304	308.303	303.925	Mrps21
0	1.36703	0.746	0.394	1.18949e-304	308.303	303.925	Atp5b
0	1.78666	0.855	0.503	1.18949e-304	308.303	303.925	Myl6
0	1.46606	0.595	0.243	1.18949e-304	308.303	303.925	Snrpd1
0	1.23549	0.695	0.343	1.18949e-304	308.303	303.925	Scand1
0	1.30464	0.666	0.315	1.18949e-304	308.303	303.925	Serp1
0	1.31726	0.622	0.271	1.18949e-304	308.303	303.925	Sf3b5
0	1.62188	0.829	0.478	1.18949e-304	308.303	303.925	Atox1
0	2.6083	0.387	0.037	1.18949e-304	308.303	303.925	Vav3
0	2.86482	0.395	0.045	1.18949e-304	308.303	303.925	AB124611
0	1.17267	0.668	0.318	1.18949e-304	308.303	303.925	Micos13
0	1.33169	0.626	0.276	1.18949e-304	308.303	303.925	Mrps14
0	1.2937	0.727	0.377	1.18949e-304	308.303	303.925	Edf1
0	1.34886	0.627	0.277	1.18949e-304	308.303	303.925	Ndufa5
0	1.35265	0.568	0.218	1.18949e-304	308.303	303.925	Scpep1
0	1.34617	0.751	0.401	1.18949e-304	308.303	303.925	Eef1g
0	1.21379	0.637	0.288	1.18949e-304	308.303	303.925	Sri
0	1.40323	0.644	0.295	1.18949e-304	308.303	303.925	Lrpap1
0	1.50847	0.652	0.303	1.18949e-304	308.303	303.925	Psmb5
0	1.45984	0.792	0.443	1.18949e-304	308.303	303.925	Atp5j
0	1.31539	0.625	0.276	1.18949e-304	308.303	303.925	Atp1a1
0	1.21352	0.629	0.28	1.18949e-304	308.303	303.925	Llph
0	2.70172	0.384	0.036	1.18949e-304	308.303	303.925	Cd44
0	1.28646	0.644	0.296	1.18949e-304	308.303	303.925	Pdap1
0	1.62465	0.794	0.446	1.18949e-304	308.303	303.925	Ucp2
0	1.48334	0.775	0.427	1.18949e-304	308.303	303.925	Gpx4
0	1.22893	0.756	0.408	1.18949e-304	308.303	303.925	Ndufa7
0	-1.80879	0.397	0.745	1.18949e-304	308.303	303.925	Cacnb2
0	1.17195	0.699	0.351	1.18949e-304	308.303	303.925	Fis1
0	1.31227	0.704	0.356	1.18949e-304	308.303	303.925	Map1lc3b
0	1.88347	0.751	0.403	1.18949e-304	308.303	303.925	Srgn
0	1.96468	0.466	0.119	1.18949e-304	308.303	303.925	Cenpb
0	1.19861	0.718	0.371	1.18949e-304	308.303	303.925	Srp14
0	1.66297	0.863	0.516	1.18949e-304	308.303	303.925	Atp5e
0	1.72101	0.505	0.158	1.18949e-304	308.303	303.925	Eif4ebp1
0	3.82001	0.367	0.02	1.18949e-304	308.303	303.925	Cyp4f18
0	1.35989	0.625	0.278	1.18949e-304	308.303	303.925	Ndufa12
0	1.31533	0.692	0.345	1.18949e-304	308.303	303.925	Psmb3
0	1.56716	0.833	0.486	1.18949e-304	308.303	303.925	H2-D1
0	1.30931	0.69	0.343	1.18949e-304	308.303	303.925	Swi5
0	1.29363	0.659	0.313	1.18949e-304	308.303	303.925	Psma4
0	1.38058	0.802	0.456	1.18949e-304	308.303	303.925	Atp5h
0	1.3007	0.773	0.427	1.18949e-304	308.303	303.925	Nedd8
0	1.46151	0.594	0.248	1.18949e-304	308.303	303.925	Cycs
0	1.47955	0.568	0.222	1.18949e-304	308.303	303.925	Higd1a
0	1.30702	0.727	0.381	1.18949e-304	308.303	303.925	Tmem14c
0	4.17737	0.36	0.014	1.18949e-304	308.303	303.925	Rai14
0	1.16713	0.691	0.345	1.18949e-304	308.303	303.925	Ubxn1
0	1.34911	0.666	0.321	1.18949e-304	308.303	303.925	Vps29
0	2.62151	0.415	0.07	1.18949e-304	308.303	303.925	Fcgr4
0	1.66859	0.507	0.162	1.18949e-304	308.303	303.925	Myo1e
0	4.66695	0.361	0.016	1.18949e-304	308.303	303.925	Gla
0	1.36866	0.787	0.443	1.18949e-304	308.303	303.925	Ndufa4
0	1.17206	0.648	0.304	1.18949e-304	308.303	303.925	Gpi1
0	1.62313	0.652	0.308	1.18949e-304	308.303	303.925	Rnh1
0	1.11942	0.686	0.342	1.18949e-304	308.303	303.925	Ndufb10
0	1.25279	0.625	0.281	1.18949e-304	308.303	303.925	Ndufa8
0	1.26287	0.596	0.252	1.18949e-304	308.303	303.925	Tkt
0	1.36801	0.606	0.262	1.18949e-304	308.303	303.925	Ap2m1
0	1.17558	0.658	0.315	1.18949e-304	308.303	303.925	Pdcd5
0	1.22182	0.659	0.316	1.18949e-304	308.303	303.925	Psme2
0	2.96975	0.402	0.059	1.18949e-304	308.303	303.925	Psat1
0	1.36241	0.747	0.404	1.18949e-304	308.303	303.925	Taldo1
0	1.24636	0.714	0.371	1.18949e-304	308.303	303.925	Tomm20
0	2.47796	0.466	0.124	1.18949e-304	308.303	303.925	Tubb4b
0	2.02008	0.524	0.183	1.18949e-304	308.303	303.925	Pcna
0	1.44377	0.657	0.316	1.18949e-304	308.303	303.925	Sdf2l1
0	1.35799	0.804	0.463	1.18949e-304	308.303	303.925	H2-K1
0	1.36914	0.69	0.349	1.18949e-304	308.303	303.925	Hif1a
0	2.0144	0.849	0.508	1.18949e-304	308.303	303.925	Calm1
0	1.04856	0.68	0.34	1.18949e-304	308.303	303.925	Arhgap24
0	1.09107	0.726	0.386	1.18949e-304	308.303	303.925	Cox17
0	1.25564	0.624	0.285	1.18949e-304	308.303	303.925	Glmp
0	1.0325	0.663	0.324	1.18949e-304	308.303	303.925	1810037I17Rik
0	1.21289	0.779	0.44	1.18949e-304	308.303	303.925	Atp6v1f
0	1.10642	0.711	0.372	1.18949e-304	308.303	303.925	D8Ertd738e
0	3.5177	0.361	0.022	1.18949e-304	308.303	303.925	Ccl2
0	1.15546	0.673	0.335	1.18949e-304	308.303	303.925	Srp9
0	1.36878	0.795	0.457	1.18949e-304	308.303	303.925	Atpif1
0	1.14585	0.717	0.379	1.18949e-304	308.303	303.925	Timm10b
0	1.57303	0.48	0.142	1.18949e-304	308.303	303.925	Trps1
0	1.76899	0.474	0.136	1.18949e-304	308.303	303.925	Mrpl28
0	1.22458	0.728	0.39	1.18949e-304	308.303	303.925	Ppp1ca
0	1.42842	0.552	0.215	1.18949e-304	308.303	303.925	Mrpl18
0	1.3339	0.528	0.191	1.18949e-304	308.303	303.925	Ndufaf8
0	1.17277	0.673	0.337	1.18949e-304	308.303	303.925	Pebp1
0	1.53774	0.535	0.199	1.18949e-304	308.303	303.925	Hebp1
0	0.995489	0.666	0.33	1.18949e-304	308.303	303.925	Anapc13
0	2.0636	0.415	0.079	1.18949e-304	308.303	303.925	S100a1
0	1.4735	0.585	0.249	1.18949e-304	308.303	303.925	Neat1
0	1.20573	0.681	0.346	1.18949e-304	308.303	303.925	Psma2
0	1.42158	0.555	0.22	1.18949e-304	308.303	303.925	Psmd2
0	1.16484	0.744	0.409	1.18949e-304	308.303	303.925	Micos10
0	2.40431	0.443	0.108	1.18949e-304	308.303	303.925	Smpdl3a
0	1.20914	0.738	0.403	1.18949e-304	308.303	303.925	Arhgdia
0	2.3277	0.418	0.083	1.18949e-304	308.303	303.925	Ctla2b
0	-1.98082	0.365	0.7	1.18949e-304	308.303	303.925	Fhit
0	1.30844	0.563	0.228	1.18949e-304	308.303	303.925	Hcfc1r1
0	1.29037	0.753	0.419	1.18949e-304	308.303	303.925	Arpc5
0	2.57069	0.4	0.066	1.18949e-304	308.303	303.925	Clec7a
0	1.26854	0.58	0.246	1.18949e-304	308.303	303.925	Dctn3
0	1.50919	0.578	0.244	1.18949e-304	308.303	303.925	Atp6v1a
0	1.15233	0.731	0.397	1.18949e-304	308.303	303.925	Psmb8
0	1.32483	0.553	0.22	1.18949e-304	308.303	303.925	Mrpl34
0	1.07632	0.673	0.34	1.18949e-304	308.303	303.925	Psma1
0	1.32893	0.617	0.284	1.18949e-304	308.303	303.925	Cndp2
0	1.7413	0.616	0.283	1.18949e-304	308.303	303.925	Lipa
0	1.01224	0.585	0.252	1.18949e-304	308.303	303.925	Rbms1
0	1.09578	0.733	0.4	1.18949e-304	308.303	303.925	Krtcap2
0	3.62743	0.353	0.02	1.18949e-304	308.303	303.925	Lilrb4b
0	0.972073	0.585	0.252	1.18949e-304	308.303	303.925	Csf2ra
0	1.13096	0.627	0.295	1.18949e-304	308.303	303.925	Lamtor5
0	5.67161	0.339	0.007	1.18949e-304	308.303	303.925	Top2a
0	1.27287	0.573	0.241	1.18949e-304	308.303	303.925	Rwdd1
0	1.12368	0.57	0.238	1.18949e-304	308.303	303.925	Polr2k
0	1.27421	0.546	0.215	1.18949e-304	308.303	303.925	1810009A15Rik
0	1.38803	0.529	0.198	1.18949e-304	308.303	303.925	Mien1
0	1.21176	0.599	0.268	1.18949e-304	308.303	303.925	Mfsd1
0	4.1656	0.363	0.032	1.18949e-304	308.303	303.925	Cd72
0	1.01672	0.689	0.358	1.18949e-304	308.303	303.925	Rtraf
0	2.10372	0.488	0.157	1.18949e-304	308.303	303.925	Cd74
0	1.27335	0.572	0.242	1.18949e-304	308.303	303.925	Pgd
0	1.86752	0.495	0.165	1.18949e-304	308.303	303.925	Txnrd1
0	1.60174	0.47	0.14	1.18949e-304	308.303	303.925	Flna
0	1.11268	0.555	0.226	1.18949e-304	308.303	303.925	Hacd4
0	1.80939	0.45	0.121	1.18949e-304	308.303	303.925	Ethe1
0	1.16862	0.622	0.293	1.18949e-304	308.303	303.925	Atp6v1d
0	1.64593	0.444	0.115	1.18949e-304	308.303	303.925	Amdhd2
0	1.29227	0.778	0.449	1.18949e-304	308.303	303.925	Atp6v0e
0	1.22639	0.627	0.298	1.18949e-304	308.303	303.925	Mydgf
0	5.96353	0.353	0.024	1.18949e-304	308.303	303.925	Thbs1
0	0.977624	0.733	0.404	1.18949e-304	308.303	303.925	Eif3f
0	1.66823	0.846	0.517	1.18949e-304	308.303	303.925	Gabarap
0	-1.85861	0.506	0.835	1.18949e-304	308.303	303.925	Agmo
0	1.16234	0.571	0.242	1.18949e-304	308.303	303.925	Chchd1
0	1.11123	0.656	0.328	1.18949e-304	308.303	303.925	Ndufab1
0	2.00842	0.434	0.106	1.18949e-304	308.303	303.925	Gsto1
0	1.65063	0.875	0.547	1.18949e-304	308.303	303.925	Gng5
0	1.11499	0.727	0.399	1.18949e-304	308.303	303.925	Park7
0	1.1683	0.569	0.241	1.18949e-304	308.303	303.925	Mrps18c
0	1.2289	0.6	0.272	1.18949e-304	308.303	303.925	Mdh2
0	1.13996	0.724	0.396	1.18949e-304	308.303	303.925	Ube2l3
0	0.968128	0.681	0.354	1.18949e-304	308.303	303.925	Polr1d
0	1.29762	0.687	0.36	1.18949e-304	308.303	303.925	P4hb
0	1.08269	0.619	0.292	1.18949e-304	308.303	303.925	Lat2
0	1.33179	0.648	0.321	1.18949e-304	308.303	303.925	C3ar1
0	1.15786	0.645	0.318	1.18949e-304	308.303	303.925	Tbcb
0	1.40773	0.776	0.449	1.18949e-304	308.303	303.925	Eif4a1
0	1.32286	0.522	0.195	1.18949e-304	308.303	303.925	Mrps16
0	-1.71186	0.387	0.714	1.18949e-304	308.303	303.925	8030442B05Rik
0	1.4343	0.861	0.534	1.18949e-304	308.303	303.925	Rpl35
0	1.05023	0.813	0.486	1.18949e-304	308.303	303.925	Uqcrh
0	1.7162	0.816	0.489	1.18949e-304	308.303	303.925	Ybx1
0	1.01615	0.701	0.374	1.18949e-304	308.303	303.925	Arf5
0	1.04217	0.69	0.363	1.18949e-304	308.303	303.925	Rab5c
0	1.19708	0.817	0.49	1.18949e-304	308.303	303.925	Atp5g2
0	1.39102	0.85	0.523	1.18949e-304	308.303	303.925	Cox8a
0	1.60094	0.701	0.374	1.18949e-304	308.303	303.925	Ms4a6d
0	1.21406	0.527	0.201	1.18949e-304	308.303	303.925	Commd4
0	1.30828	0.631	0.305	1.18949e-304	308.303	303.925	Hnrnpab
0	1.20511	0.802	0.477	1.18949e-304	308.303	303.925	Btf3
0	0.946878	0.643	0.318	1.18949e-304	308.303	303.925	Dpm3
0	1.42233	0.504	0.179	1.18949e-304	308.303	303.925	Trappc1
0	1.46146	0.744	0.419	1.18949e-304	308.303	303.925	Tuba1b
0	1.06135	0.739	0.414	1.18949e-304	308.303	303.925	Psmb1
0	1.32364	0.854	0.529	1.18949e-304	308.303	303.925	Rpl31
0	1.03732	0.731	0.406	1.18949e-304	308.303	303.925	Ost4
0	1.26441	0.494	0.169	1.18949e-304	308.303	303.925	Coro1c
0	1.19814	0.565	0.24	1.18949e-304	308.303	303.925	Gltp
0	1.60808	0.49	0.165	1.18949e-304	308.303	303.925	Arl11
0	1.13528	0.6	0.275	1.18949e-304	308.303	303.925	Ndufs8
0	0.895479	0.675	0.351	1.18949e-304	308.303	303.925	Ndufb3
0	1.02907	0.735	0.411	1.18949e-304	308.303	303.925	Hsbp1
0	1.49041	0.506	0.182	1.18949e-304	308.303	303.925	Mrpl12
0	1.04059	0.622	0.298	1.18949e-304	308.303	303.925	Tomm22
0	1.0752	0.713	0.389	1.18949e-304	308.303	303.925	Lamtor1
0	1.28427	0.52	0.197	1.18949e-304	308.303	303.925	Mrps36
0	1.04119	0.782	0.459	1.18949e-304	308.303	303.925	Mrpl52
0	1.00542	0.632	0.309	1.18949e-304	308.303	303.925	Cct5
0	1.12418	0.599	0.276	1.18949e-304	308.303	303.925	Psma5
0	1.19044	0.59	0.267	1.18949e-304	308.303	303.925	Ube2m
0	1.53785	0.835	0.512	1.18949e-304	308.303	303.925	Cd68
0	1.14385	0.581	0.258	1.18949e-304	308.303	303.925	Psmc5
0	3.02845	0.355	0.032	1.18949e-304	308.303	303.925	Ahnak
0	1.3404	0.543	0.221	1.18949e-304	308.303	303.925	Gde1
0	1.16559	0.538	0.216	1.18949e-304	308.303	303.925	Mrpl14
0	5.03942	0.33	0.008	1.18949e-304	308.303	303.925	Rab7b
0	0.918457	0.657	0.335	1.18949e-304	308.303	303.925	Dynlrb1
0	2.77702	0.367	0.045	1.18949e-304	308.303	303.925	Slfn5
0	0.926029	0.735	0.413	1.18949e-304	308.303	303.925	Nsa2
0	0.958942	0.634	0.312	1.18949e-304	308.303	303.925	Dazap2
0	1.09483	0.598	0.276	1.18949e-304	308.303	303.925	Snrpd3
0	1.39062	0.819	0.497	1.18949e-304	308.303	303.925	Npm1
0	0.999747	0.602	0.28	1.18949e-304	308.303	303.925	Zmat2
0	1.7175	0.872	0.55	1.18949e-304	308.303	303.925	Cfl1
0	1.21518	0.779	0.458	1.18949e-304	308.303	303.925	Atp5pb
0	1.38973	0.849	0.528	1.18949e-304	308.303	303.925	Rpl36al
0	1.35426	0.794	0.474	1.18949e-304	308.303	303.925	Atp6v1g1
0	1.19273	0.548	0.228	1.18949e-304	308.303	303.925	Naa38
0	3.24419	0.37	0.05	1.18949e-304	308.303	303.925	Cst7
0	4.27076	0.335	0.015	1.18949e-304	308.303	303.925	Clec4d
0	1.43249	0.456	0.136	1.18949e-304	308.303	303.925	Gcnt2
0	1.0002	0.601	0.281	1.18949e-304	308.303	303.925	Ufc1
0	1.76302	0.856	0.536	1.18949e-304	308.303	303.925	Atp6v0c
0	1.10224	0.796	0.477	1.18949e-304	308.303	303.925	Eef2
0	1.22312	0.507	0.188	1.18949e-304	308.303	303.925	Psmg4
0	0.803434	0.728	0.409	1.18949e-304	308.303	303.925	Ndufa6
0	-1.78396	0.456	0.775	1.18949e-304	308.303	303.925	P3h2
0	1.01749	0.644	0.325	1.18949e-304	308.303	303.925	Cuta
0	1.05895	0.735	0.416	1.18949e-304	308.303	303.925	Atp5a1
0	1.21412	0.576	0.257	1.18949e-304	308.303	303.925	Akr1b3
0	1.2979	0.593	0.274	1.18949e-304	308.303	303.925	Pld3
0	0.928124	0.611	0.293	1.18949e-304	308.303	303.925	Gm2000
0	1.07305	0.624	0.306	1.18949e-304	308.303	303.925	Gm2a
0	1.39442	0.493	0.175	1.18949e-304	308.303	303.925	Eif1ax
0	1.20917	0.584	0.266	1.18949e-304	308.303	303.925	Ssr2
0	1.02937	0.572	0.254	1.18949e-304	308.303	303.925	Polr2j
0	3.45091	0.993	0.675	1.18949e-304	308.303	303.925	Ftl1
0	1.13939	0.566	0.248	1.18949e-304	308.303	303.925	Rtcb
0	1.16442	0.704	0.386	1.18949e-304	308.303	303.925	Ppp1r14b
0	4.39248	0.332	0.015	1.18949e-304	308.303	303.925	Adam8
0	1.13547	0.78	0.463	1.18949e-304	308.303	303.925	Slc25a3
0	0.904916	0.738	0.421	1.18949e-304	308.303	303.925	Sub1
0	1.52466	0.838	0.521	1.18949e-304	308.303	303.925	Cotl1
0	1.28731	0.519	0.203	1.18949e-304	308.303	303.925	Cops6
0	1.82557	0.422	0.106	1.18949e-304	308.303	303.925	Bola3
0	2.30344	0.354	0.038	1.18949e-304	308.303	303.925	F13a1
0	0.959746	0.744	0.428	1.18949e-304	308.303	303.925	Psme1
0	1.20118	0.518	0.202	1.18949e-304	308.303	303.925	Pin4
0	1.12326	0.813	0.497	1.18949e-304	308.303	303.925	Rpl4
0	0.995701	0.667	0.352	1.18949e-304	308.303	303.925	Eloc
0	0.979131	0.561	0.246	1.18949e-304	308.303	303.925	Dnajc15
0	1.0416	0.617	0.302	1.18949e-304	308.303	303.925	Ddost
0	1.22475	0.77	0.455	1.18949e-304	308.303	303.925	Dynll1
0	1.11015	0.732	0.417	1.18949e-304	308.303	303.925	Gusb
0	0.922047	0.62	0.305	1.18949e-304	308.303	303.925	Sin3b
0	1.08541	0.761	0.446	1.18949e-304	308.303	303.925	Rbx1
0	1.48926	0.88	0.566	1.18949e-304	308.303	303.925	Cox4i1
0	1.27685	0.643	0.329	1.18949e-304	308.303	303.925	Soat1
0	1.06108	0.631	0.317	1.18949e-304	308.303	303.925	Jpt1
0	1.21011	0.513	0.199	1.18949e-304	308.303	303.925	Mrpl36
0	1.4408	0.591	0.277	1.18949e-304	308.303	303.925	Blvrb
0	0.951446	0.592	0.278	1.18949e-304	308.303	303.925	Cox14
0	1.62016	0.883	0.57	1.18949e-304	308.303	303.925	Sh3bgrl3
0	1.15004	0.544	0.231	1.18949e-304	308.303	303.925	Phb2
0	0.863641	0.792	0.479	1.18949e-304	308.303	303.925	Uba52
0	4.08372	0.343	0.03	1.18949e-304	308.303	303.925	Vat1
0	1.84966	0.9	0.587	1.18949e-304	308.303	303.925	Rps2
0	1.13788	0.633	0.32	1.18949e-304	308.303	303.925	Rpn1
0	0.899665	0.616	0.303	1.18949e-304	308.303	303.925	Mrpl23
0	0.944927	0.648	0.335	1.18949e-304	308.303	303.925	Cct2
0	3.43486	0.336	0.023	1.18949e-304	308.303	303.925	Emilin2
0	1.05195	0.567	0.254	1.18949e-304	308.303	303.925	Svbp
0	1.48694	0.839	0.526	1.18949e-304	308.303	303.925	Arpc3
0	1.00355	0.784	0.472	1.18949e-304	308.303	303.925	Tpd52
0	1.11042	0.54	0.228	1.18949e-304	308.303	303.925	Tomm5
0	1.02774	0.778	0.466	1.18949e-304	308.303	303.925	Hspe1
0	0.918265	0.614	0.302	1.18949e-304	308.303	303.925	Ndufv2
0	0.914114	0.707	0.395	1.18949e-304	308.303	303.925	Chmp4b
0	0.950027	0.584	0.272	1.18949e-304	308.303	303.925	Rbis
0	0.961391	0.696	0.384	1.18949e-304	308.303	303.925	Arpp19
0	1.51616	0.459	0.148	1.18949e-304	308.303	303.925	Hras
0	0.867736	0.671	0.36	1.18949e-304	308.303	303.925	Spcs1
0	1.10301	0.538	0.227	1.18949e-304	308.303	303.925	Smim29
0	0.922524	0.623	0.312	1.18949e-304	308.303	303.925	Sdhb
0	0.864063	0.609	0.298	1.18949e-304	308.303	303.925	Use1
0	2.00563	0.421	0.11	1.18949e-304	308.303	303.925	Siva1
0	1.10188	0.731	0.42	1.18949e-304	308.303	303.925	Fkbp2
0	0.962277	0.583	0.272	1.18949e-304	308.303	303.925	Nop10
0	1.12388	0.573	0.262	1.18949e-304	308.303	303.925	Rexo2
0	1.2173	0.777	0.467	1.18949e-304	308.303	303.925	Ncl
0	0.848661	0.636	0.326	1.18949e-304	308.303	303.925	Mpc2
0	1.02757	0.752	0.442	1.18949e-304	308.303	303.925	Lamtor4
0	1.93581	0.419	0.109	1.18949e-304	308.303	303.925	Esyt1
0	0.929556	0.766	0.456	1.18949e-304	308.303	303.925	Slc25a5
0	1.48592	0.475	0.165	1.18949e-304	308.303	303.925	Slc25a39
0	0.981238	0.623	0.314	1.18949e-304	308.303	303.925	Tmed3
0	1.01479	0.603	0.294	1.18949e-304	308.303	303.925	Psma6
0	0.829891	0.643	0.334	1.18949e-304	308.303	303.925	Nol7
0	1.45344	0.81	0.502	1.18949e-304	308.303	303.925	Sdcbp
0	1.07539	0.55	0.242	1.18949e-304	308.303	303.925	Cdv3
0	4.03561	0.328	0.02	1.18949e-304	308.303	303.925	Gm1673
0	1.33727	0.493	0.185	1.18949e-304	308.303	303.925	Eif1a
0	0.931185	0.589	0.281	1.18949e-304	308.303	303.925	Psmb7
0	0.992912	0.578	0.27	1.18949e-304	308.303	303.925	Coa3
0	0.964722	0.777	0.47	1.18949e-304	308.303	303.925	Pomp
0	5.69993	0.313	0.006	1.18949e-304	308.303	303.925	Ecm1
0	1.37585	0.839	0.532	1.18949e-304	308.303	303.925	Oaz1
0	1.39579	0.511	0.205	1.18949e-304	308.303	303.925	Dctpp1
0	1.06033	0.542	0.236	1.18949e-304	308.303	303.925	Csnk2b
0	1.2123	0.492	0.186	1.18949e-304	308.303	303.925	Ufm1
0	0.980994	0.74	0.434	1.18949e-304	308.303	303.925	Eif3c
0	0.988234	0.579	0.273	1.18949e-304	308.303	303.925	Snu13
0	0.962427	0.559	0.254	1.18949e-304	308.303	303.925	Aplp2
0	1.00064	0.559	0.254	1.18949e-304	308.303	303.925	Mrpl42
0	1.88715	0.509	0.204	1.18949e-304	308.303	303.925	Ninj1
0	-2.23002	0.584	0.889	1.18949e-304	308.303	303.925	Ccnd3
0	0.810019	0.652	0.347	1.18949e-304	308.303	303.925	Drap1
0	0.836717	0.632	0.327	1.18949e-304	308.303	303.925	Tmem167
0	0.897387	0.751	0.446	1.18949e-304	308.303	303.925	Dad1
0	0.960221	0.588	0.283	1.18949e-304	308.303	303.925	Tcp1
0	0.943669	0.756	0.452	1.18949e-304	308.303	303.925	Atp5c1
0	1.65247	0.421	0.117	1.18949e-304	308.303	303.925	Anxa4
0	0.873703	0.624	0.32	1.18949e-304	308.303	303.925	Ndufs7
0	1.54488	0.441	0.137	1.18949e-304	308.303	303.925	Lrrc59
0	3.40792	0.329	0.025	1.18949e-304	308.303	303.925	Cd300lf
0	0.866805	0.729	0.425	1.18949e-304	308.303	303.925	Tbca
0	0.925548	0.589	0.285	1.18949e-304	308.303	303.925	Cuedc2
0	1.83667	0.408	0.104	1.18949e-304	308.303	303.925	Ubl4a
0	1.22839	0.834	0.53	1.18949e-304	308.303	303.925	Chchd2
0	1.42431	0.474	0.17	1.18949e-304	308.303	303.925	Cdk4
0	1.42303	0.455	0.152	1.18949e-304	308.303	303.925	Gba
0	1.37146	0.882	0.579	1.18949e-304	308.303	303.925	Rps17
0	1.01235	0.538	0.235	1.18949e-304	308.303	303.925	Uqcrfs1
0	0.75773	0.631	0.328	1.18949e-304	308.303	303.925	Cmpk1
0	0.967898	0.621	0.318	1.18949e-304	308.303	303.925	Slc25a4
0	0.894173	0.626	0.323	1.18949e-304	308.303	303.925	Lsm6
0	0.972019	0.719	0.416	1.18949e-304	308.303	303.925	Snx3
0	0.838461	0.598	0.295	1.18949e-304	308.303	303.925	Zcrb1
0	1.04292	0.583	0.28	1.18949e-304	308.303	303.925	Rnaseh2c
0	0.834361	0.65	0.348	1.18949e-304	308.303	303.925	Psmc3
0	0.807685	0.673	0.371	1.18949e-304	308.303	303.925	Snrpb
0	1.73686	0.918	0.616	1.18949e-304	308.303	303.925	Rpsa
0	0.813986	0.78	0.478	1.18949e-304	308.303	303.925	Rnasek
0	0.880056	0.604	0.302	1.18949e-304	308.303	303.925	Necap2
0	1.18803	0.829	0.527	1.18949e-304	308.303	303.925	Ssr4
0	1.37577	0.802	0.501	1.18949e-304	308.303	303.925	Creg1
0	1.46034	0.462	0.161	1.18949e-304	308.303	303.925	Crlf2
0	1.07994	0.54	0.239	1.18949e-304	308.303	303.925	Mlf2
0	1.28491	0.474	0.173	1.18949e-304	308.303	303.925	Elof1
0	0.885248	0.74	0.439	1.18949e-304	308.303	303.925	Sumo2
0	6.01867	0.306	0.005	1.18949e-304	308.303	303.925	Birc5
0	1.72735	0.898	0.598	1.18949e-304	308.303	303.925	Serf2
0	0.776234	0.68	0.38	1.18949e-304	308.303	303.925	Ptpn6
0	4.68133	0.311	0.011	1.18949e-304	308.303	303.925	Cd93
0	0.797547	0.586	0.286	1.18949e-304	308.303	303.925	Snf8
0	4.56649	0.314	0.014	1.18949e-304	308.303	303.925	Cela1
0	1.34004	0.848	0.548	1.18949e-304	308.303	303.925	Cox7c
0	0.77989	0.571	0.271	1.18949e-304	308.303	303.925	Pfdn1
0	1.23869	0.443	0.144	1.18949e-304	308.303	303.925	Sp100
0	2.40445	0.399	0.1	1.18949e-304	308.303	303.925	Slc48a1
0	0.961637	0.715	0.416	1.18949e-304	308.303	303.925	Set
0	0.903729	0.73	0.431	1.18949e-304	308.303	303.925	Ywhab
0	5.85035	0.304	0.005	1.18949e-304	308.303	303.925	Mki67
0	1.02974	0.514	0.216	1.18949e-304	308.303	303.925	Tmem126a
0	1.33527	0.465	0.167	1.18949e-304	308.303	303.925	Glrx5
0	0.900791	0.628	0.33	1.18949e-304	308.303	303.925	Ostc
0	3.29434	0.32	0.022	1.18949e-304	308.303	303.925	Arhgap10
0	0.76243	0.638	0.34	1.18949e-304	308.303	303.925	Cwc15
0	0.938581	0.597	0.299	1.18949e-304	308.303	303.925	Vdac1
0	1.09705	0.49	0.192	1.18949e-304	308.303	303.925	Nampt
0	0.874622	0.564	0.266	1.18949e-304	308.303	303.925	Sys1
0	1.06856	0.813	0.515	1.18949e-304	308.303	303.925	Ppib
0	1.06353	0.513	0.216	1.18949e-304	308.303	303.925	Acadl
0	0.704258	0.645	0.348	1.18949e-304	308.303	303.925	Mrps33
0	1.25795	0.492	0.195	1.18949e-304	308.303	303.925	Lsm5
0	0.97986	0.553	0.257	1.18949e-304	308.303	303.925	Surf4
0	2.63582	0.394	0.098	1.18949e-304	308.303	303.925	S100a10
0	1.01663	0.512	0.216	1.18949e-304	308.303	303.925	Polr2i
0	0.835391	0.681	0.385	1.18949e-304	308.303	303.925	Hnrnpa1
0	0.726538	0.562	0.266	1.18949e-304	308.303	303.925	Man2a1
0	0.711581	0.687	0.391	1.18949e-304	308.303	303.925	Ier3ip1
0	0.741679	0.592	0.296	1.18949e-304	308.303	303.925	Aimp1
0	1.07675	0.497	0.201	1.18949e-304	308.303	303.925	Atp13a2
0	0.645547	0.717	0.421	1.18949e-304	308.303	303.925	Psenen
0	0.818893	0.594	0.298	1.18949e-304	308.303	303.925	Wdr83os
0	2.47394	0.359	0.063	1.18949e-304	308.303	303.925	Lmnb1
0	1.54157	0.854	0.558	1.18949e-304	308.303	303.925	Arpc1b
0	0.848087	0.552	0.257	1.18949e-304	308.303	303.925	Ndufs2
0	1.02078	0.511	0.216	1.18949e-304	308.303	303.925	Pdcd6
0	3.06541	0.334	0.039	1.18949e-304	308.303	303.925	Cdkn1a
0	-1.75564	0.457	0.752	1.18949e-304	308.303	303.925	Plxna4
0	0.713474	0.728	0.433	1.18949e-304	308.303	303.925	Ndufc2
0	2.64351	0.359	0.064	1.18949e-304	308.303	303.925	Adssl1
0	1.08004	0.469	0.174	1.18949e-304	308.303	303.925	Dap
0	0.650173	0.723	0.428	1.18949e-304	308.303	303.925	Eef1d
0	0.70404	0.538	0.244	1.18949e-304	308.303	303.925	Ola1
0	1.87439	0.406	0.112	1.18949e-304	308.303	303.925	AI506816
0	1.05983	0.523	0.229	1.18949e-304	308.303	303.925	C1qbp
0	0.783274	0.58	0.286	1.18949e-304	308.303	303.925	Rbm8a
0	0.755296	0.622	0.328	1.18949e-304	308.303	303.925	Cdc37
0	1.63225	0.888	0.595	1.18949e-304	308.303	303.925	Ptma
0	1.11779	0.509	0.216	1.18949e-304	308.303	303.925	Hdgf
0	1.22852	0.874	0.581	1.18949e-304	308.303	303.925	Rpl14
0	1.05825	0.526	0.233	1.18949e-304	308.303	303.925	Cyc1
0	2.37384	0.382	0.089	1.18949e-304	308.303	303.925	H2-Ab1
0	0.907432	0.596	0.303	1.18949e-304	308.303	303.925	Nudc
0	0.792627	0.597	0.304	1.18949e-304	308.303	303.925	Wdr1
0	1.16088	0.491	0.198	1.18949e-304	308.303	303.925	Sod2
0	0.790022	0.639	0.347	1.18949e-304	308.303	303.925	Atp6v0d1
0	1.22664	0.669	0.377	1.18949e-304	308.303	303.925	Bcl2a1b
0	1.37929	0.879	0.587	1.18949e-304	308.303	303.925	Rack1
0	0.928551	0.503	0.211	1.18949e-304	308.303	303.925	Ten1
0	0.868273	0.637	0.345	1.18949e-304	308.303	303.925	Dnajb11
0	0.696856	0.623	0.331	1.18949e-304	308.303	303.925	Eif3m
0	3.70949	0.313	0.021	1.18949e-304	308.303	303.925	Zbp1
0	0.706384	0.605	0.313	1.18949e-304	308.303	303.925	Chmp5
0	0.820217	0.61	0.318	1.18949e-304	308.303	303.925	Vdac3
0	1.9366	0.377	0.085	1.18949e-304	308.303	303.925	Ddx39a
0	1.11715	0.481	0.189	1.18949e-304	308.303	303.925	Spg21
0	0.826406	0.574	0.282	1.18949e-304	308.303	303.925	Srp19
0	1.1419	0.487	0.195	1.18949e-304	308.303	303.925	Sra1
0	1.07597	0.472	0.18	1.18949e-304	308.303	303.925	Mrpl21
0	-1.61061	0.522	0.814	1.18949e-304	308.303	303.925	Gm10790
0	0.742206	0.534	0.243	1.18949e-304	308.303	303.925	Mapkapk2
0	1.20731	0.87	0.579	1.18949e-304	308.303	303.925	Rpl7a
0	0.920785	0.543	0.252	1.18949e-304	308.303	303.925	Adh5
0	2.4241	0.332	0.041	1.18949e-304	308.303	303.925	Clic4
0	0.735138	0.673	0.382	1.18949e-304	308.303	303.925	Fuca1
0	0.853102	0.684	0.393	1.18949e-304	308.303	303.925	Atp6v1e1
0	3.18153	0.329	0.038	1.18949e-304	308.303	303.925	Metrnl
0	1.00221	0.509	0.218	1.18949e-304	308.303	303.925	Snrpc
0	0.863076	0.541	0.25	1.18949e-304	308.303	303.925	Ube2a
0	3.91067	0.319	0.028	1.18949e-304	308.303	303.925	Cks1b
0	0.703451	0.744	0.453	1.18949e-304	308.303	303.925	Grcc10
0	0.737758	0.737	0.446	1.18949e-304	308.303	303.925	Eif3h
0	1.04131	0.503	0.213	1.18949e-304	308.303	303.925	Grpel1
0	1.0322	0.769	0.479	1.18949e-304	308.303	303.925	Arl6ip1
0	2.93265	0.323	0.033	1.18949e-304	308.303	303.925	Tmem205
0	-1.89463	0.343	0.633	1.18949e-304	308.303	303.925	Col27a1
0	0.580522	0.608	0.318	1.18949e-304	308.303	303.925	Commd1
0	1.1109	0.48	0.19	1.18949e-304	308.303	303.925	Nt5c
0	0.669088	0.664	0.375	1.18949e-304	308.303	303.925	Eif3e
0	0.865676	0.764	0.475	1.18949e-304	308.303	303.925	Reep5
0	0.740455	0.608	0.319	1.18949e-304	308.303	303.925	Ssr3
0	1.59554	0.407	0.118	1.18949e-304	308.303	303.925	Nasp
0	2.15614	0.356	0.067	1.18949e-304	308.303	303.925	Glipr1
0	1.16236	0.481	0.192	1.18949e-304	308.303	303.925	Naglu
0	0.753391	0.666	0.378	1.18949e-304	308.303	303.925	Bzw1
0	0.732333	0.764	0.476	1.18949e-304	308.303	303.925	Vamp8
0	0.7436	0.636	0.348	1.18949e-304	308.303	303.925	M6pr
0	1.02661	0.503	0.215	1.18949e-304	308.303	303.925	Psmc4
0	0.718899	0.642	0.354	1.18949e-304	308.303	303.925	Cct8
0	1.48552	0.395	0.107	1.18949e-304	308.303	303.925	Atrnl1
0	-1.73344	0.463	0.751	1.18949e-304	308.303	303.925	Prkca
0	1.20321	0.449	0.162	1.18949e-304	308.303	303.925	Dmac1
0	0.851516	0.548	0.261	1.18949e-304	308.303	303.925	Copb2
0	0.673144	0.635	0.348	1.18949e-304	308.303	303.925	Cnpy2
0	0.839005	0.553	0.266	1.18949e-304	308.303	303.925	Eif2s1
0	1.03346	0.469	0.182	1.18949e-304	308.303	303.925	Glrx2
0	0.669041	0.592	0.305	1.18949e-304	308.303	303.925	Dnajc19
0	0.768742	0.706	0.419	1.18949e-304	308.303	303.925	Lgals9
0	4.71332	0.299	0.012	1.18949e-304	308.303	303.925	Myof
0	0.819817	0.568	0.281	1.18949e-304	308.303	303.925	Med28
0	-1.53085	0.536	0.823	1.18949e-304	308.303	303.925	Atp8a2
0	0.866961	0.546	0.26	1.18949e-304	308.303	303.925	Eid1
0	3.13475	0.342	0.056	1.18949e-304	308.303	303.925	Isg15
0	1.01102	0.504	0.218	1.18949e-304	308.303	303.925	Mrpl17
0	1.47725	0.921	0.635	1.18949e-304	308.303	303.925	Rps26
0	0.865554	0.539	0.253	1.18949e-304	308.303	303.925	Lsm12
0	0.919662	0.53	0.244	1.18949e-304	308.303	303.925	Naa50
0	1.08571	0.482	0.196	1.18949e-304	308.303	303.925	Pfdn6
0	0.906999	0.848	0.563	1.18949e-304	308.303	303.925	Eef1b2
0	1.03333	0.495	0.21	1.18949e-304	308.303	303.925	Eif6
0	1.17957	0.432	0.147	1.18949e-304	308.303	303.925	Ap1s1
0	0.680826	0.774	0.489	1.18949e-304	308.303	303.925	Bsg
0	2.73338	0.323	0.038	1.18949e-304	308.303	303.925	Alcam
0	-1.56746	0.44	0.725	1.18949e-304	308.303	303.925	Ifitm10
0	0.681485	0.619	0.334	1.18949e-304	308.303	303.925	Sf3b6
0	0.909315	0.482	0.197	1.18949e-304	308.303	303.925	Diaph1
0	0.786447	0.788	0.504	1.18949e-304	308.303	303.925	Coro1a
0	1.18975	0.439	0.155	1.18949e-304	308.303	303.925	Mvb12a
0	0.944811	0.506	0.222	1.18949e-304	308.303	303.925	Psmc1
0	1.52099	0.898	0.614	1.18949e-304	308.303	303.925	Ctsl
0	0.862709	0.539	0.255	1.18949e-304	308.303	303.925	Psmd6
0	0.987608	0.874	0.59	1.18949e-304	308.303	303.925	Rpl36a
0	0.764322	0.613	0.329	1.18949e-304	308.303	303.925	Mdh1
0	0.701103	0.591	0.307	1.18949e-304	308.303	303.925	Vps28
0	0.893943	0.764	0.481	1.18949e-304	308.303	303.925	Eif2s2
0	1.43725	0.447	0.164	1.18949e-304	308.303	303.925	Tlr2
0	0.647272	0.627	0.344	1.18949e-304	308.303	303.925	Psmd4
0	0.710114	0.664	0.381	1.18949e-304	308.303	303.925	Psmb2
0	0.83165	0.518	0.235	1.18949e-304	308.303	303.925	Snapc5
0	0.697139	0.507	0.224	1.18949e-304	308.303	303.925	Cmc1
0	0.686103	0.684	0.401	1.18949e-304	308.303	303.925	Prkar1a
0	2.28688	0.372	0.089	1.18949e-304	308.303	303.925	Id2
0	1.28351	0.506	0.223	1.18949e-304	308.303	303.925	Card19
0	0.677768	0.706	0.423	1.18949e-304	308.303	303.925	Eif5b
0	0.662959	0.742	0.459	1.18949e-304	308.303	303.925	Gnb2
0	0.832727	0.618	0.335	1.18949e-304	308.303	303.925	Sptssa
0	0.819051	0.688	0.405	1.18949e-304	308.303	303.925	Vcp
0	1.76306	0.389	0.107	1.18949e-304	308.303	303.925	Gyg
0	1.00732	0.872	0.59	1.18949e-304	308.303	303.925	Rpl23a
0	2.85296	0.314	0.032	1.18949e-304	308.303	303.925	Emb
0	1.23123	0.43	0.148	1.18949e-304	308.303	303.925	Dph3
0	1.2274	0.457	0.175	1.18949e-304	308.303	303.925	Twf1
0	0.93389	0.472	0.19	1.18949e-304	308.303	303.925	Blvra
0	1.31387	0.417	0.135	1.18949e-304	308.303	303.925	Mrpl27
0	0.717988	0.582	0.3	1.18949e-304	308.303	303.925	Lman2
0	0.764737	0.568	0.286	1.18949e-304	308.303	303.925	Timm23
0	3.73144	0.303	0.021	1.18949e-304	308.303	303.925	Cfp
0	0.844966	0.779	0.498	1.18949e-304	308.303	303.925	Selenof
0	0.922385	0.527	0.246	1.18949e-304	308.303	303.925	Fuca2
0	0.946076	0.496	0.215	1.18949e-304	308.303	303.925	Stub1
0	0.732323	0.544	0.263	1.18949e-304	308.303	303.925	Etf1
0	0.879527	0.484	0.203	1.18949e-304	308.303	303.925	Znhit1
0	1.0156	0.477	0.196	1.18949e-304	308.303	303.925	Hcst
0	0.7496	0.596	0.315	1.18949e-304	308.303	303.925	Cope
0	0.927733	0.729	0.448	1.18949e-304	308.303	303.925	Manf
0	0.865425	0.628	0.348	1.18949e-304	308.303	303.925	Hspd1
0	0.760406	0.555	0.275	1.18949e-304	308.303	303.925	Bcas2
0	1.44046	0.857	0.577	1.18949e-304	308.303	303.925	Calr
0	1.04182	0.861	0.581	1.18949e-304	308.303	303.925	Rpl29
0	0.875467	0.767	0.487	1.18949e-304	308.303	303.925	Gngt2
0	0.921383	0.658	0.378	1.18949e-304	308.303	303.925	Dek
0	2.76743	0.31	0.03	1.18949e-304	308.303	303.925	Iqgap2
0	0.797185	0.551	0.271	1.18949e-304	308.303	303.925	2810001A02Rik
0	1.0094	0.609	0.329	1.18949e-304	308.303	303.925	Nucks1
0	5.82007	0.284	0.004	1.18949e-304	308.303	303.925	Ube2c
0	0.675584	0.605	0.325	1.18949e-304	308.303	303.925	Nucb1
0	0.801073	0.58	0.3	1.18949e-304	308.303	303.925	Hpf1
0	5.3647	0.288	0.008	1.18949e-304	308.303	303.925	Pclaf
0	-1.62865	0.67	0.95	1.18949e-304	308.303	303.925	Csmd3
0	0.839069	0.521	0.242	1.18949e-304	308.303	303.925	Cox20
0	1.66631	0.388	0.109	1.18949e-304	308.303	303.925	Pirb
0	0.664134	0.636	0.357	1.18949e-304	308.303	303.925	Smarca5
0	0.609196	0.653	0.374	1.18949e-304	308.303	303.925	Trir
0	0.967985	0.461	0.182	1.18949e-304	308.303	303.925	Pkib
0	1.16038	0.447	0.168	1.18949e-304	308.303	303.925	Ddt
0	1.05003	0.853	0.574	1.18949e-304	308.303	303.925	Naca
0	2.84534	0.332	0.053	1.18949e-304	308.303	303.925	Tnfsf13
0	1.07648	0.464	0.185	1.18949e-304	308.303	303.925	Fam162a
0	2.28683	0.338	0.059	1.18949e-304	308.303	303.925	Bex3
0	0.597306	0.715	0.436	1.18949e-304	308.303	303.925	Cap1
0	0.721462	0.635	0.357	1.18949e-304	308.303	303.925	Cd48
0	0.862208	0.527	0.249	1.18949e-304	308.303	303.925	Nenf
0	0.915043	0.513	0.235	1.18949e-304	308.303	303.925	Sars
0	2.54264	0.323	0.045	1.18949e-304	308.303	303.925	Htatip2
0	0.93067	0.498	0.22	1.18949e-304	308.303	303.925	Echs1
0	1.3023	0.893	0.615	1.18949e-304	308.303	303.925	Rpl15
0	0.635666	0.599	0.321	1.18949e-304	308.303	303.925	Atp6v1b2
0	-1.89827	0.416	0.694	1.18949e-304	308.303	303.925	Itga9
0	1.40268	0.588	0.31	1.18949e-304	308.303	303.925	Ccl6
0	0.801711	0.568	0.29	1.18949e-304	308.303	303.925	Psmd12
0	3.43515	0.301	0.023	1.18949e-304	308.303	303.925	Ncapg2
0	3.32566	0.304	0.026	1.18949e-304	308.303	303.925	Plec
0	0.68016	0.677	0.4	1.18949e-304	308.303	303.925	Rpn2
0	0.723671	0.536	0.259	1.18949e-304	308.303	303.925	Rrp1
0	0.668224	0.593	0.316	1.18949e-304	308.303	303.925	Mtpn
0	0.63896	0.585	0.308	1.18949e-304	308.303	303.925	Glrx3
0	0.662376	0.703	0.426	1.18949e-304	308.303	303.925	Atp1b3
0	1.136	0.824	0.547	1.18949e-304	308.303	303.925	Pycard
0	0.585608	0.644	0.368	1.18949e-304	308.303	303.925	Dnajc8
0	0.533049	0.658	0.382	1.18949e-304	308.303	303.925	Sdf4
0	0.834455	0.522	0.246	1.18949e-304	308.303	303.925	Uqcrc1
0	10.8463	0.277	0.001	1.18949e-304	308.303	303.925	Arg1
0	0.891593	0.463	0.187	1.18949e-304	308.303	303.925	Dusp3
0	1.31082	0.417	0.141	1.18949e-304	308.303	303.925	Mea1
0	0.683485	0.569	0.293	1.18949e-304	308.303	303.925	Commd3
0	0.871694	0.572	0.296	1.18949e-304	308.303	303.925	Pdia4
0	1.17896	0.572	0.296	1.18949e-304	308.303	303.925	Gas6
0	0.736836	0.564	0.288	1.18949e-304	308.303	303.925	Psmb10
0	1.37924	0.845	0.57	1.18949e-304	308.303	303.925	Hspa5
0	0.708014	0.549	0.274	1.18949e-304	308.303	303.925	Hsd17b12
0	1.4491	0.467	0.192	1.18949e-304	308.303	303.925	Hmgn2
0	1.5819	0.928	0.653	1.18949e-304	308.303	303.925	Rps19
0	1.12024	0.444	0.169	1.18949e-304	308.303	303.925	Pin1
0	0.999733	0.425	0.15	1.18949e-304	308.303	303.925	Galc
0	0.748151	0.522	0.247	1.18949e-304	308.303	303.925	Tmem134
0	1.09159	0.447	0.172	1.18949e-304	308.303	303.925	Mrpl11
0	0.769697	0.573	0.298	1.18949e-304	308.303	303.925	Denr
0	1.0787	0.47	0.195	1.18949e-304	308.303	303.925	Il4ra
0	3.53282	0.294	0.019	1.18949e-304	308.303	303.925	Plxnc1
0	0.715738	0.56	0.286	1.18949e-304	308.303	303.925	Mapk3
0	1.64131	0.368	0.094	1.18949e-304	308.303	303.925	Dpp7
0	1.02056	0.788	0.514	1.18949e-304	308.303	303.925	Ptms
0	0.8219	0.502	0.228	1.18949e-304	308.303	303.925	Emc6
0	-1.81167	0.578	0.852	1.18949e-304	308.303	303.925	Abca9
0	0.708656	0.749	0.475	1.18949e-304	308.303	303.925	Vdac2
0	1.1979	0.4	0.126	1.18949e-304	308.303	303.925	Nubp1
0	1.39758	0.904	0.63	1.18949e-304	308.303	303.925	Rpl10a
0	1.51746	0.382	0.108	1.18949e-304	308.303	303.925	Acaa2
0	1.16184	0.474	0.2	1.18949e-304	308.303	303.925	C5ar1
0	0.651294	0.568	0.294	1.18949e-304	308.303	303.925	Antkmt
0	0.767943	0.734	0.46	1.18949e-304	308.303	303.925	Eif3a
0	0.83795	0.816	0.542	1.18949e-304	308.303	303.925	Pabpc1
0	0.833931	0.5	0.227	1.18949e-304	308.303	303.925	Mtln
0	0.626018	0.676	0.403	1.18949e-304	308.303	303.925	Dstn
0	0.648219	0.657	0.384	1.18949e-304	308.303	303.925	Tmed2
0	1.39389	0.45	0.177	1.18949e-304	308.303	303.925	Por
0	0.825457	0.521	0.248	1.18949e-304	308.303	303.925	Leprotl1
0	0.794051	0.742	0.469	1.18949e-304	308.303	303.925	Hsp90aa1
0	1.02324	0.457	0.184	1.18949e-304	308.303	303.925	Eif3l
0	0.551936	0.703	0.43	1.18949e-304	308.303	303.925	Mrfap1
0	0.478712	0.618	0.346	1.18949e-304	308.303	303.925	Dgkz
0	0.774421	0.521	0.249	1.18949e-304	308.303	303.925	Ggh
0	1.79309	0.338	0.066	1.18949e-304	308.303	303.925	Xylt1
0	1.10134	0.445	0.173	1.18949e-304	308.303	303.925	Ccdc124
0	1.04294	0.775	0.503	1.18949e-304	308.303	303.925	Pdia6
0	0.590638	0.647	0.375	1.18949e-304	308.303	303.925	Dtnbp1
0	0.672287	0.58	0.308	1.18949e-304	308.303	303.925	Txnl1
0	2.56834	0.314	0.043	1.18949e-304	308.303	303.925	Bbln
0	0.71831	0.533	0.262	1.18949e-304	308.303	303.925	Naa20
0	0.755418	0.649	0.378	1.18949e-304	308.303	303.925	Cebpb
0	0.824285	0.502	0.231	1.18949e-304	308.303	303.925	Tmem147
0	1.26439	0.393	0.122	1.18949e-304	308.303	303.925	Get3
0	0.624906	0.671	0.4	1.18949e-304	308.303	303.925	Vps35
0	0.908917	0.488	0.217	1.18949e-304	308.303	303.925	Sdhd
0	1.11516	0.425	0.154	1.18949e-304	308.303	303.925	Mrpl58
0	2.60971	0.329	0.058	1.18949e-304	308.303	303.925	Mmp14
0	0.851375	0.487	0.216	1.18949e-304	308.303	303.925	Gnpda1
0	0.634936	0.614	0.343	1.18949e-304	308.303	303.925	Cnih4
0	0.678984	0.573	0.302	1.18949e-304	308.303	303.925	Ap3s1
0	0.637891	0.577	0.306	1.18949e-304	308.303	303.925	Sfr1
0	0.968459	0.519	0.249	1.18949e-304	308.303	303.925	Anp32e
0	0.628852	0.649	0.379	1.18949e-304	308.303	303.925	Rbpj
0	1.42195	0.915	0.645	1.18949e-304	308.303	303.925	Rplp0
0	0.542184	0.651	0.381	1.18949e-304	308.303	303.925	Pcbp1
0	1.2389	0.901	0.631	1.18949e-304	308.303	303.925	Rps5
0	0.660308	0.512	0.242	1.18949e-304	308.303	303.925	Fkbp8
0	0.790082	0.498	0.228	1.18949e-304	308.303	303.925	Rab8a
0	1.37059	0.394	0.124	1.18949e-304	308.303	303.925	Ptrhd1
0	1.18832	0.897	0.627	1.18949e-304	308.303	303.925	Rpl24
0	0.60628	0.654	0.384	1.18949e-304	308.303	303.925	Slc3a2
0	0.653068	0.563	0.293	1.18949e-304	308.303	303.925	Fkbp1a
0	3.14452	0.291	0.021	1.18949e-304	308.303	303.925	Igf1
0	0.671194	0.584	0.314	1.18949e-304	308.303	303.925	Abcg1
0	0.530116	0.596	0.326	1.18949e-304	308.303	303.925	Abcf1
0	0.697124	0.525	0.256	1.18949e-304	308.303	303.925	Ndufa10
0	0.745661	0.515	0.246	1.18949e-304	308.303	303.925	Nop53
0	2.14507	0.333	0.064	1.18949e-304	308.303	303.925	Coq7
0	0.858369	0.494	0.225	1.18949e-304	308.303	303.925	Eif3g
0	0.419859	0.643	0.374	1.18949e-304	308.303	303.925	Gm26740
0	0.508716	0.644	0.375	1.18949e-304	308.303	303.925	Vmp1
0	0.801501	0.479	0.21	1.18949e-304	308.303	303.925	Eny2
0	0.495742	0.753	0.484	1.18949e-304	308.303	303.925	Cox7a2l
0	0.666087	0.539	0.27	1.18949e-304	308.303	303.925	Mrpl43
0	0.727824	0.71	0.441	1.18949e-304	308.303	303.925	Psma3
0	0.606809	0.566	0.297	1.18949e-304	308.303	303.925	Cetn3
0	1.62426	0.356	0.088	1.18949e-304	308.303	303.925	Ly9
0	0.7223	0.511	0.243	1.18949e-304	308.303	303.925	Psmd13
0	1.11305	0.894	0.626	1.18949e-304	308.303	303.925	Rpl27
0	0.688121	0.628	0.36	1.18949e-304	308.303	303.925	Litaf
0	0.575056	0.816	0.548	1.18949e-304	308.303	303.925	Pfdn5
0	0.915676	0.491	0.224	1.18949e-304	308.303	303.925	Yif1b
0	0.630522	0.672	0.405	1.18949e-304	308.303	303.925	Metap2
0	0.518245	0.632	0.365	1.18949e-304	308.303	303.925	Os9
0	1.06424	0.528	0.261	1.18949e-304	308.303	303.925	H2az2
0	1.39312	0.861	0.594	1.18949e-304	308.303	303.925	Pfn1
0	2.60115	0.307	0.04	1.18949e-304	308.303	303.925	Ccl3
0	0.532728	0.625	0.358	1.18949e-304	308.303	303.925	Ywhaq
0	0.644427	0.556	0.29	1.18949e-304	308.303	303.925	Psmc2
0	0.622416	0.549	0.283	1.18949e-304	308.303	303.925	Eif4b
0	0.879761	0.42	0.154	1.18949e-304	308.303	303.925	Arhgap15
0	2.13865	0.33	0.064	1.18949e-304	308.303	303.925	AI662270
0	0.907737	0.454	0.188	1.18949e-304	308.303	303.925	Acp1
0	0.796776	0.516	0.25	1.18949e-304	308.303	303.925	Fkbp3
0	0.747294	0.481	0.215	1.18949e-304	308.303	303.925	Wdr89
0	0.711134	0.767	0.501	1.18949e-304	308.303	303.925	Tmed10
0	0.763116	0.505	0.239	1.18949e-304	308.303	303.925	Uba1
0	0.906559	0.428	0.163	1.18949e-304	308.303	303.925	Adam9
0	1.88385	0.343	0.078	1.18949e-304	308.303	303.925	Glrx
0	0.842029	0.466	0.201	1.18949e-304	308.303	303.925	Mrps18a
0	0.723402	0.597	0.332	1.18949e-304	308.303	303.925	Slc15a3
0	1.01071	0.817	0.552	1.18949e-304	308.303	303.925	Arhgdib
0	0.452263	0.548	0.284	1.18949e-304	308.303	303.925	Mbd2
0	1.45264	0.383	0.119	1.18949e-304	308.303	303.925	Nans
0	0.949071	0.88	0.616	1.18949e-304	308.303	303.925	Rps6
0	0.919618	0.435	0.171	1.18949e-304	308.303	303.925	Zbtb8os
0	0.505314	0.629	0.365	1.18949e-304	308.303	303.925	Rer1
0	0.610416	0.622	0.358	1.18949e-304	308.303	303.925	Ppp1cc
0	0.945919	0.452	0.188	1.18949e-304	308.303	303.925	Eif3b
0	0.803395	0.778	0.514	1.18949e-304	308.303	303.925	Serbp1
0	-2.09186	0.265	0.529	1.18949e-304	308.303	303.925	4732471J01Rik
0	0.494033	0.647	0.383	1.18949e-304	308.303	303.925	Rhog
0	0.552405	0.505	0.241	1.18949e-304	308.303	303.925	Evi2b
0	0.814696	0.468	0.204	1.18949e-304	308.303	303.925	Txn2
0	0.564856	0.573	0.309	1.18949e-304	308.303	303.925	Ghitm
0	0.549676	0.684	0.421	1.18949e-304	308.303	303.925	Sf3b2
0	1.28869	0.389	0.126	1.18949e-304	308.303	303.925	Coa5
0	0.650614	0.508	0.245	1.18949e-304	308.303	303.925	Sdhc
0	1.90644	0.331	0.068	1.18949e-304	308.303	303.925	Haus8
0	0.704007	0.507	0.244	1.18949e-304	308.303	303.925	Ciao2b
0	1.65113	0.354	0.091	1.18949e-304	308.303	303.925	Cdc34
0	0.818232	0.455	0.192	1.18949e-304	308.303	303.925	Rars
0	0.747517	0.487	0.224	1.18949e-304	308.303	303.925	Fam50a
0	1.04984	0.436	0.173	1.18949e-304	308.303	303.925	Hsd17b10
0	0.564139	0.548	0.286	1.18949e-304	308.303	303.925	Scp2
0	2.1057	0.361	0.099	1.18949e-304	308.303	303.925	Smc4
0	0.670538	0.774	0.512	1.18949e-304	308.303	303.925	Efhd2
0	1.47257	0.395	0.133	1.18949e-304	308.303	303.925	Gsr
0	0.530377	0.635	0.373	1.18949e-304	308.303	303.925	Rab11a
0	1.86503	0.321	0.059	1.18949e-304	308.303	303.925	Arhgap19
0	1.123	0.391	0.129	1.18949e-304	308.303	303.925	Pbdc1
0	1.90572	0.304	0.043	1.18949e-304	308.303	303.925	Itga4
0	0.7268	0.734	0.473	1.18949e-304	308.303	303.925	Rab7
0	0.899353	0.444	0.183	1.18949e-304	308.303	303.925	Abhd17a
0	1.23427	0.419	0.158	1.18949e-304	308.303	303.925	Creld2
0	0.432107	0.624	0.363	1.18949e-304	308.303	303.925	Trmt112
0	0.50792	0.584	0.323	1.18949e-304	308.303	303.925	Eif4e2
0	0.572775	0.572	0.311	1.18949e-304	308.303	303.925	Cct7
0	0.541499	0.543	0.283	1.18949e-304	308.303	303.925	Snrpb2
0	0.878889	0.447	0.187	1.18949e-304	308.303	303.925	Ube2v1
0	1.07452	0.417	0.157	1.18949e-304	308.303	303.925	Snrpa1
0	0.646688	0.759	0.499	1.18949e-304	308.303	303.925	Spcs2
0	0.439238	0.643	0.383	1.18949e-304	308.303	303.925	Rnf7
0	0.678091	0.465	0.205	1.18949e-304	308.303	303.925	Cast
0	1.20497	0.899	0.639	1.18949e-304	308.303	303.925	Rpl8
0	0.475983	0.608	0.348	1.18949e-304	308.303	303.925	Pold4
0	0.529355	0.713	0.453	1.18949e-304	308.303	303.925	Itgb2
0	0.476794	0.705	0.445	1.18949e-304	308.303	303.925	Tmed9
0	0.479993	0.669	0.41	1.18949e-304	308.303	303.925	Slc6a6
0	1.27949	0.914	0.655	1.18949e-304	308.303	303.925	Rpl12
0	0.883945	0.45	0.191	1.18949e-304	308.303	303.925	Ptpmt1
0	0.904818	0.435	0.176	1.18949e-304	308.303	303.925	Mcee
0	1.28428	0.381	0.122	1.18949e-304	308.303	303.925	Fdx2
0	4.41181	0.274	0.015	1.18949e-304	308.303	303.925	Cdk1
0	1.07514	0.862	0.603	1.18949e-304	308.303	303.925	H3f3b
0	0.623804	0.754	0.495	1.18949e-304	308.303	303.925	Sec11c
0	1.46454	0.365	0.106	1.18949e-304	308.303	303.925	Got1
0	2.34223	0.287	0.028	1.18949e-304	308.303	303.925	Pltp
0	0.567677	0.59	0.331	1.18949e-304	308.303	303.925	Ssr1
0	0.50655	0.541	0.283	1.18949e-304	308.303	303.925	Cript
0	1.03456	0.421	0.163	1.18949e-304	308.303	303.925	Timm17a
0	1.03592	0.895	0.637	1.18949e-304	308.303	303.925	Rpl22
0	0.969002	0.436	0.178	1.18949e-304	308.303	303.925	Kmt5a
0	0.765082	0.788	0.53	1.18949e-304	308.303	303.925	Alox5ap
0	1.13754	0.402	0.144	1.18949e-304	308.303	303.925	Mrpl35
0	0.508317	0.627	0.369	1.18949e-304	308.303	303.925	Gmfg
0	0.909758	0.45	0.192	1.18949e-304	308.303	303.925	Gadd45gip1
0	1.80204	0.958	0.7	1.18949e-304	308.303	303.925	Rpl41
0	1.03161	0.381	0.123	1.18949e-304	308.303	303.925	Ddx41
0	0.424278	0.602	0.344	1.18949e-304	308.303	303.925	Ik
0	0.454705	0.601	0.343	1.18949e-304	308.303	303.925	Supt4a
0	0.502882	0.584	0.326	1.18949e-304	308.303	303.925	Gpsm3
0	0.611197	0.557	0.3	1.18949e-304	308.303	303.925	Cct3
0	0.396153	0.671	0.414	1.18949e-304	308.303	303.925	Evi2a
0	1.12489	0.417	0.16	1.18949e-304	308.303	303.925	Ppdpf
0	1.21165	0.905	0.648	1.18949e-304	308.303	303.925	Rpl18
0	0.827039	0.459	0.202	1.18949e-304	308.303	303.925	Slc35b1
0	0.399486	0.73	0.473	1.18949e-304	308.303	303.925	Selenok
0	0.795905	0.424	0.167	1.18949e-304	308.303	303.925	Uqcc5
0	0.505436	0.565	0.308	1.18949e-304	308.303	303.925	Ndufs3
0	0.72171	0.452	0.196	1.18949e-304	308.303	303.925	Fmn1
0	0.746825	0.481	0.225	1.18949e-304	308.303	303.925	Lamtor3
0	0.890997	0.448	0.192	1.18949e-304	308.303	303.925	Plbd2
0	0.568764	0.758	0.502	1.18949e-304	308.303	303.925	Arpc4
0	2.05693	0.301	0.045	1.18949e-304	308.303	303.925	Enpp1
0	1.24764	0.907	0.651	1.18949e-304	308.303	303.925	Ppia
0	0.591966	0.513	0.257	1.18949e-304	308.303	303.925	Clptm1l
0	0.58358	0.733	0.477	1.18949e-304	308.303	303.925	Ywhaz
0	1.02688	0.416	0.16	1.18949e-304	308.303	303.925	Mrpl13
0	0.864077	0.631	0.375	1.18949e-304	308.303	303.925	Hmgn1
0	-1.68879	0.505	0.761	1.18949e-304	308.303	303.925	Prkn
0	0.719912	0.532	0.276	1.18949e-304	308.303	303.925	Psmb9
0	2.25217	0.304	0.048	1.18949e-304	308.303	303.925	Plin3
0	0.542064	0.628	0.372	1.18949e-304	308.303	303.925	Cebpzos
0	0.807821	0.452	0.196	1.18949e-304	308.303	303.925	Bscl2
0	0.486414	0.588	0.332	1.18949e-304	308.303	303.925	Tmem208
0	0.506154	0.55	0.295	1.18949e-304	308.303	303.925	Snrnp27
0	1.26088	0.87	0.615	1.18949e-304	308.303	303.925	H3f3a
0	0.927501	0.805	0.55	1.18949e-304	308.303	303.925	Bri3
0	0.745426	0.782	0.527	1.18949e-304	308.303	303.925	Hnrnpf
0	2.93681	0.28	0.025	1.18949e-304	308.303	303.925	Ezr
0	1.10151	0.906	0.651	1.18949e-304	308.303	303.925	Rpl36
0	0.94439	0.43	0.175	1.18949e-304	308.303	303.925	Rab1b
0	0.607704	0.585	0.33	1.18949e-304	308.303	303.925	Grina
0	0.714916	0.802	0.548	1.18949e-304	308.303	303.925	Actr3
0	0.587038	0.518	0.264	1.18949e-304	308.303	303.925	Jtb
0	0.811529	0.442	0.188	1.18949e-304	308.303	303.925	Arl6ip4
0	0.981053	0.515	0.261	1.18949e-304	308.303	303.925	Sqstm1
0	1.165	0.876	0.622	1.18949e-304	308.303	303.925	Npc2
0	0.46489	0.626	0.372	1.18949e-304	308.303	303.925	Higd2a
0	0.789683	0.458	0.204	1.18949e-304	308.303	303.925	Sap18
0	1.08844	0.889	0.635	1.18949e-304	308.303	303.925	Rpl3
0	1.40909	0.926	0.672	1.18949e-304	308.303	303.925	Rps18
0	0.769782	0.847	0.593	1.18949e-304	308.303	303.925	Clic1
0	0.459924	0.623	0.369	1.18949e-304	308.303	303.925	Atp6ap1
0	0.324748	0.589	0.335	1.18949e-304	308.303	303.925	Cfdp1
0	0.487575	0.587	0.333	1.18949e-304	308.303	303.925	BC031181
0	0.556631	0.542	0.289	1.18949e-304	308.303	303.925	Eprs
0	0.56337	0.537	0.284	1.18949e-304	308.303	303.925	Morf4l2
0	0.79513	0.431	0.178	1.18949e-304	308.303	303.925	Snhg6
0	1.07347	0.4	0.147	1.18949e-304	308.303	303.925	Mrpl41
0	-1.95546	0.212	0.465	1.18949e-304	308.303	303.925	Cfap74
0	0.935207	0.421	0.168	1.18949e-304	308.303	303.925	Mrps12
0	0.851235	0.395	0.142	1.18949e-304	308.303	303.925	Gnptab
0	1.06093	0.335	0.082	1.18949e-304	308.303	303.925	Sptbn1
0	0.600467	0.517	0.264	1.18949e-304	308.303	303.925	Fam104a
0	1.15	0.393	0.14	1.18949e-304	308.303	303.925	Ak6
0	0.77136	0.468	0.215	1.18949e-304	308.303	303.925	Phf5a
0	0.474253	0.642	0.389	1.18949e-304	308.303	303.925	Hprt
0	-1.6815	0.343	0.596	1.18949e-304	308.303	303.925	Bank1
0	0.570797	0.57	0.317	1.18949e-304	308.303	303.925	Rap2a
0	-1.72149	0.285	0.537	1.18949e-304	308.303	303.925	Rhobtb1
0	0.322901	0.666	0.414	1.18949e-304	308.303	303.925	Hnrnpa0
0	0.45227	0.683	0.431	1.18949e-304	308.303	303.925	Ube2i
0	0.657004	0.505	0.253	1.18949e-304	308.303	303.925	Parp1
0	0.436396	0.628	0.376	1.18949e-304	308.303	303.925	Mapre1
0	0.531042	0.521	0.269	1.18949e-304	308.303	303.925	Ube2q1
0	0.487251	0.606	0.354	1.18949e-304	308.303	303.925	Hadha
0	0.803331	0.882	0.63	1.18949e-304	308.303	303.925	Rpl5
0	0.850259	0.449	0.197	1.18949e-304	308.303	303.925	Bud31
0	1.13373	0.871	0.619	1.18949e-304	308.303	303.925	Lamp1
0	0.642095	0.474	0.222	1.18949e-304	308.303	303.925	Acot13
0	2.47297	0.974	0.722	1.18949e-304	308.303	303.925	Ctsb
0	0.755058	0.47	0.218	1.18949e-304	308.303	303.925	Eif3d
0	0.587542	0.592	0.34	1.18949e-304	308.303	303.925	Cct6a
0	1.04945	0.419	0.168	1.18949e-304	308.303	303.925	Ssrp1
0	0.622095	0.486	0.235	1.18949e-304	308.303	303.925	Dnajc2
0	0.446869	0.611	0.36	1.18949e-304	308.303	303.925	Rheb
0	0.895122	0.411	0.16	1.18949e-304	308.303	303.925	Nucb2
0	0.644212	0.507	0.256	1.18949e-304	308.303	303.925	Tm2d2
0	1.36787	0.322	0.071	1.18949e-304	308.303	303.925	Galns
0	1.0365	0.903	0.652	1.18949e-304	308.303	303.925	Rps15
0	0.697173	0.474	0.223	1.18949e-304	308.303	303.925	C1d
0	0.979881	0.454	0.203	1.18949e-304	308.303	303.925	Tnfsf12
0	1.10143	0.44	0.189	1.18949e-304	308.303	303.925	Alyref
0	0.767749	0.471	0.22	1.18949e-304	308.303	303.925	Dpy30
0	0.563366	0.674	0.424	1.18949e-304	308.303	303.925	Tpp1
0	0.344791	0.679	0.429	1.18949e-304	308.303	303.925	mt-Atp8
0	2.80213	0.273	0.023	1.18949e-304	308.303	303.925	Mcub
0	2.009	0.355	0.105	1.18949e-304	308.303	303.925	Smc2
0	1.93362	0.317	0.067	1.18949e-304	308.303	303.925	Pole3
0	0.981056	0.391	0.141	1.18949e-304	308.303	303.925	Hscb
0	1.20164	0.93	0.68	1.18949e-304	308.303	303.925	Rpl38
0	0.600875	0.496	0.246	1.18949e-304	308.303	303.925	Smim11
0	0.840839	0.453	0.203	1.18949e-304	308.303	303.925	Vma21
0	1.02386	0.474	0.224	1.18949e-304	308.303	303.925	Ramp1
0	-1.75594	0.457	0.707	1.18949e-304	308.303	303.925	Bbs9
0	-1.70036	0.407	0.656	1.18949e-304	308.303	303.925	Prkce
0	0.653854	0.462	0.213	1.18949e-304	308.303	303.925	Med8
0	0.704536	0.526	0.277	1.18949e-304	308.303	303.925	Stat1
0	0.535459	0.484	0.235	1.18949e-304	308.303	303.925	Mtch2
0	0.71687	0.813	0.564	1.18949e-304	308.303	303.925	Hmgb1
0	0.610669	0.506	0.257	1.18949e-304	308.303	303.925	Trappc4
0	1.38361	0.905	0.656	1.18949e-304	308.303	303.925	Grn
0	0.85047	0.756	0.507	1.18949e-304	308.303	303.925	App
0	0.385131	0.583	0.334	1.18949e-304	308.303	303.925	Sugt1
0	0.528269	0.537	0.289	1.18949e-304	308.303	303.925	Psmd7
0	0.43162	0.678	0.43	1.18949e-304	308.303	303.925	Macroh2a1
0	1.14248	0.406	0.158	1.18949e-304	308.303	303.925	Prxl2b
0	1.3179	0.397	0.149	1.18949e-304	308.303	303.925	Lsm2
0	1.66577	0.336	0.088	1.18949e-304	308.303	303.925	Ccdc86
0	0.643264	0.505	0.257	1.18949e-304	308.303	303.925	Raly
0	0.464792	0.633	0.385	1.18949e-304	308.303	303.925	Ssu72
0	0.500218	0.78	0.532	1.18949e-304	308.303	303.925	Brk1
0	0.552058	0.484	0.236	1.18949e-304	308.303	303.925	Napa
0	0.819994	0.451	0.203	1.18949e-304	308.303	303.925	Tmem9b
0	1.0596	0.385	0.137	1.18949e-304	308.303	303.925	Got2
0	0.840834	0.424	0.176	1.18949e-304	308.303	303.925	Gtf3c6
0	0.513014	0.726	0.478	1.18949e-304	308.303	303.925	Arf1
0	0.733474	0.505	0.257	1.18949e-304	308.303	303.925	Dynll2
0	0.503848	0.525	0.277	1.18949e-304	308.303	303.925	Thoc7
0	0.596736	0.509	0.261	1.18949e-304	308.303	303.925	Polr2g
0	0.393878	0.654	0.406	1.18949e-304	308.303	303.925	Bcap31
0	1.26096	0.347	0.099	1.18949e-304	308.303	303.925	Ell2
0	0.409374	0.53	0.283	1.18949e-304	308.303	303.925	Snx1
0	0.965017	0.398	0.151	1.18949e-304	308.303	303.925	Churc1
0	0.878196	0.881	0.634	1.18949e-304	308.303	303.925	Rpl7
0	1.64871	0.328	0.081	1.18949e-304	308.303	303.925	Psen2
0	1.02476	0.848	0.601	1.18949e-304	308.303	303.925	Pdia3
0	1.22693	0.924	0.677	1.18949e-304	308.303	303.925	Rpl28
0	0.425673	0.491	0.244	1.18949e-304	308.303	303.925	Etfa
0	1.28057	0.376	0.129	1.18949e-304	308.303	303.925	Cyb5r3
0	0.670657	0.58	0.333	1.18949e-304	308.303	303.925	Lap3
0	0.511686	0.536	0.29	1.18949e-304	308.303	303.925	Polr2e
0	0.437736	0.599	0.353	1.18949e-304	308.303	303.925	Emc7
0	0.525003	0.512	0.266	1.18949e-304	308.303	303.925	Cdc42se1
0	0.786141	0.429	0.183	1.18949e-304	308.303	303.925	Pole4
0	0.692604	0.482	0.236	1.18949e-304	308.303	303.925	Sec13
0	1.14754	0.379	0.133	1.18949e-304	308.303	303.925	Trappc6a
0	0.553565	0.518	0.272	1.18949e-304	308.303	303.925	Ebp
0	0.485209	0.567	0.321	1.18949e-304	308.303	303.925	Cacybp
0	0.420429	0.574	0.328	1.18949e-304	308.303	303.925	Mrps15
0	0.542411	0.569	0.323	1.18949e-304	308.303	303.925	Tmem86a
0	0.434417	0.577	0.331	1.18949e-304	308.303	303.925	Dnaja2
0	0.470783	0.533	0.288	1.18949e-304	308.303	303.925	Ift20
0	2.96069	0.269	0.024	1.18949e-304	308.303	303.925	Atp1a3
0	0.510301	0.507	0.262	1.18949e-304	308.303	303.925	Colgalt1
0	0.982255	0.911	0.666	1.18949e-304	308.303	303.925	Rps25
0	0.624021	0.844	0.599	1.18949e-304	308.303	303.925	Eif1
0	0.844792	0.418	0.173	1.18949e-304	308.303	303.925	Neu1
0	1.10282	0.377	0.132	1.18949e-304	308.303	303.925	1110038B12Rik
0	1.01187	0.416	0.171	1.18949e-304	308.303	303.925	Idh1
0	0.890127	0.412	0.167	1.18949e-304	308.303	303.925	Lage3
0	0.671751	0.455	0.211	1.18949e-304	308.303	303.925	Mrpl15
0	0.774335	0.467	0.223	1.18949e-304	308.303	303.925	Pa2g4
0	0.539456	0.521	0.277	1.18949e-304	308.303	303.925	Pea15a
0	0.583999	0.504	0.26	1.18949e-304	308.303	303.925	Ncf4
0	0.847393	0.422	0.178	1.18949e-304	308.303	303.925	Rpl9-ps6
0	0.969864	0.413	0.169	1.18949e-304	308.303	303.925	Cisd1
0	0.632615	0.472	0.228	1.18949e-304	308.303	303.925	Naa12
0	0.488437	0.579	0.335	1.18949e-304	308.303	303.925	Nfic
0	0.276304	0.651	0.408	1.18949e-304	308.303	303.925	Tmco1
0	0.762351	0.527	0.284	1.18949e-304	308.303	303.925	Cdk2ap2
0	1.98557	0.389	0.146	1.18949e-304	308.303	303.925	Gclm
0	0.760429	0.447	0.204	1.18949e-304	308.303	303.925	Magoh
0	0.680758	0.455	0.212	1.18949e-304	308.303	303.925	Yeats4
0	0.417961	0.588	0.345	1.18949e-304	308.303	303.925	Ergic3
0	0.985741	0.874	0.631	1.18949e-304	308.303	303.925	Gnas
0	9.75868	0.243	0	1.18949e-304	308.303	303.925	Emp1
0	0.5042	0.523	0.28	1.18949e-304	308.303	303.925	Kdelr1
0	0.501713	0.484	0.241	1.18949e-304	308.303	303.925	Vps36
0	0.592894	0.483	0.24	1.18949e-304	308.303	303.925	Mbd3
0	0.3662	0.598	0.355	1.18949e-304	308.303	303.925	Map2k2
0	0.415457	0.765	0.522	1.18949e-304	308.303	303.925	Hnrnpk
0	1.49392	0.328	0.085	1.18949e-304	308.303	303.925	Bak1
0	0.476212	0.519	0.276	1.18949e-304	308.303	303.925	Ppp1r11
0	0.490487	0.511	0.268	1.18949e-304	308.303	303.925	Usp14
0	0.759957	0.441	0.198	1.18949e-304	308.303	303.925	Cetn2
0	0.573365	0.476	0.233	1.18949e-304	308.303	303.925	Kxd1
0	0.46626	0.663	0.421	1.18949e-304	308.303	303.925	Sgpl1
0	0.488359	0.536	0.294	1.18949e-304	308.303	303.925	Anapc11
0	0.788862	0.823	0.581	1.18949e-304	308.303	303.925	Ctsa
0	0.506241	0.499	0.257	1.18949e-304	308.303	303.925	Suclg1
0	0.657748	0.439	0.197	1.18949e-304	308.303	303.925	Copz1
0	2.16977	0.308	0.066	1.18949e-304	308.303	303.925	H2-Aa
0	2.156	0.283	0.041	1.18949e-304	308.303	303.925	Niban2
0	0.541476	0.695	0.453	1.18949e-304	308.303	303.925	Nrp1
0	0.450751	0.654	0.413	1.18949e-304	308.303	303.925	Dnajc3
0	0.651164	0.458	0.217	1.18949e-304	308.303	303.925	Smim30
0	0.992283	0.405	0.164	1.18949e-304	308.303	303.925	Dcxr
0	2.99004	0.273	0.032	1.18949e-304	308.303	303.925	Gmnn
0	2.19769	0.293	0.052	1.18949e-304	308.303	303.925	Ptgr1
0	1.18427	0.362	0.121	1.18949e-304	308.303	303.925	Dnmt1
0	0.6085	0.492	0.251	1.18949e-304	308.303	303.925	Hspa9
0	0.498253	0.696	0.455	1.18949e-304	308.303	303.925	Fcgr2b
0	0.798184	0.384	0.144	1.18949e-304	308.303	303.925	Morrbid
0	0.569046	0.466	0.226	1.18949e-304	308.303	303.925	Sumo3
0	2.91621	0.259	0.019	1.18949e-304	308.303	303.925	Ehd1
0	0.483482	0.48	0.24	1.18949e-304	308.303	303.925	Txndc9
0	0.77282	0.43	0.19	1.18949e-304	308.303	303.925	Hypk
0	0.841872	0.415	0.175	1.18949e-304	308.303	303.925	Zyx
0	0.786011	0.414	0.174	1.18949e-304	308.303	303.925	Mrpl53
0	0.471743	0.492	0.252	1.18949e-304	308.303	303.925	Actn4
0	1.00498	0.374	0.134	1.18949e-304	308.303	303.925	Gtf2f1
0	0.737169	0.881	0.641	1.18949e-304	308.303	303.925	Rpl10
0	1.95686	0.29	0.05	1.18949e-304	308.303	303.925	Dnase1l1
0	0.446993	0.573	0.333	1.18949e-304	308.303	303.925	Adipor1
0	0.413337	0.539	0.3	1.18949e-304	308.303	303.925	Pfdn2
0	0.363599	0.548	0.309	1.18949e-304	308.303	303.925	Ssbp4
0	0.421306	0.665	0.426	1.18949e-304	308.303	303.925	Hspa4
0	0.85346	0.394	0.155	1.18949e-304	308.303	303.925	Dpcd
0	0.48395	0.503	0.264	1.18949e-304	308.303	303.925	Nrp2
0	0.985525	0.417	0.178	1.18949e-304	308.303	303.925	Degs1
0	0.748871	0.422	0.183	1.18949e-304	308.303	303.925	Ssna1
0	0.523056	0.48	0.241	1.18949e-304	308.303	303.925	Nras
0	3.49415	0.256	0.017	1.18949e-304	308.303	303.925	Mgst1
0	0.575929	0.485	0.246	1.18949e-304	308.303	303.925	Ech1
0	0.795186	0.832	0.593	1.18949e-304	308.303	303.925	Rhoa
0	0.746483	0.427	0.188	1.18949e-304	308.303	303.925	Cln5
0	0.362804	0.697	0.458	1.18949e-304	308.303	303.925	Tnfaip8
0	1.31704	0.931	0.693	1.18949e-304	308.303	303.925	Ctsz
0	0.524548	0.462	0.224	1.18949e-304	308.303	303.925	Zcchc17
0	0.482799	0.456	0.218	1.18949e-304	308.303	303.925	Nagk
0	1.01555	0.396	0.158	1.18949e-304	308.303	303.925	Nsmce1
0	2.58436	0.267	0.029	1.18949e-304	308.303	303.925	Dna2
0	0.673785	0.459	0.221	1.18949e-304	308.303	303.925	Ormdl2
0	-1.72928	0.582	0.82	1.18949e-304	308.303	303.925	0610040J01Rik
0	0.469869	0.502	0.264	1.18949e-304	308.303	303.925	Emg1
0	0.795526	0.414	0.176	1.18949e-304	308.303	303.925	Nudt21
0	0.3638	0.517	0.279	1.18949e-304	308.303	303.925	Vti1b
0	0.454231	0.497	0.259	1.18949e-304	308.303	303.925	Aco2
0	0.458951	0.53	0.293	1.18949e-304	308.303	303.925	Ddx21
0	2.24377	0.28	0.043	1.18949e-304	308.303	303.925	Ccl4
0	0.614798	0.46	0.223	1.18949e-304	308.303	303.925	Pdcl3
0	0.665018	0.823	0.586	1.18949e-304	308.303	303.925	Ptpn18
0	2.13409	0.286	0.049	1.18949e-304	308.303	303.925	Chst1
0	0.546655	0.489	0.252	1.18949e-304	308.303	303.925	Cers2
0	0.468662	0.604	0.367	1.18949e-304	308.303	303.925	Akirin1
0	0.223527	0.621	0.384	1.18949e-304	308.303	303.925	Gng12
0	0.754984	0.423	0.186	1.18949e-304	308.303	303.925	Pigbos1
0	3.18214	0.253	0.016	1.18949e-304	308.303	303.925	Sh3pxd2b
0	0.629707	0.472	0.235	1.18949e-304	308.303	303.925	Mgat2
0	0.660133	0.626	0.389	1.18949e-304	308.303	303.925	Ms4a6b
0	1.17111	0.371	0.134	1.18949e-304	308.303	303.925	Npm3
0	0.39557	0.565	0.328	1.18949e-304	308.303	303.925	Tsn
0	0.195266	0.678	0.442	1.18949e-304	308.303	303.925	Zfp706
0	0.894158	0.395	0.159	1.18949e-304	308.303	303.925	Mrps7
0	0.488801	0.516	0.28	1.18949e-304	308.303	303.925	Rragc
0	4.78691	0.246	0.01	1.18949e-304	308.303	303.925	Cdca8
0	2.14514	0.284	0.048	1.18949e-304	308.303	303.925	Fgr
0	0.811204	0.411	0.175	1.18949e-304	308.303	303.925	Pop5
0	3.82967	0.25	0.014	1.18949e-304	308.303	303.925	Clec4n
0	1.1388	0.373	0.137	1.18949e-304	308.303	303.925	Gm56862
0	0.452111	0.621	0.385	1.18949e-304	308.303	303.925	Vps13c
0	0.353391	0.738	0.502	1.18949e-304	308.303	303.925	Myl12b
0	0.607514	0.776	0.54	1.18949e-304	308.303	303.925	Ostf1
0	0.368516	0.591	0.355	1.18949e-304	308.303	303.925	Nono
0	0.450945	0.569	0.333	1.18949e-304	308.303	303.925	Psmd1
0	0.31421	0.564	0.328	1.18949e-304	308.303	303.925	Ube2n
0	0.410633	0.533	0.298	1.18949e-304	308.303	303.925	Snhg8
0	0.533624	0.465	0.23	1.18949e-304	308.303	303.925	Pnkd
0	0.954092	0.394	0.159	1.18949e-304	308.303	303.925	Serpinb6a
0	1.46759	0.332	0.097	1.18949e-304	308.303	303.925	Guca1a
0	2.01292	0.264	0.029	1.18949e-304	308.303	303.925	Gda
0	0.334007	0.72	0.485	1.18949e-304	308.303	303.925	Srsf9
0	0.940152	0.903	0.668	1.18949e-304	308.303	303.925	Rps3
0	1.76797	0.302	0.067	1.18949e-304	308.303	303.925	Borcs8
0	1.26625	0.897	0.662	1.18949e-304	308.303	303.925	Cyba
0	0.429932	0.639	0.404	1.18949e-304	308.303	303.925	Atp6v1c1
0	0.319799	0.592	0.357	1.18949e-304	308.303	303.925	Derl1
0	0.451804	0.52	0.286	1.18949e-304	308.303	303.925	Arpc5l
0	0.22663	0.653	0.419	1.18949e-304	308.303	303.925	Selenos
0	0.375721	0.532	0.298	1.18949e-304	308.303	303.925	Uqcrc2
0	0.411217	0.532	0.298	1.18949e-304	308.303	303.925	Prr13
0	0.824509	0.402	0.168	1.18949e-304	308.303	303.925	Phyh
0	3.0307	0.255	0.021	1.18949e-304	308.303	303.925	Pstpip1
0	0.889669	0.375	0.141	1.18949e-304	308.303	303.925	Itgb1bp1
0	0.998646	0.391	0.157	1.18949e-304	308.303	303.925	Dynlt2b
0	2.47135	0.257	0.023	1.18949e-304	308.303	303.925	Xdh
0	0.793155	0.423	0.189	1.18949e-304	308.303	303.925	Rad23a
0	0.750353	0.432	0.198	1.18949e-304	308.303	303.925	Prkcsh
0	0.263719	0.621	0.387	1.18949e-304	308.303	303.925	Cct4
0	1.76433	0.288	0.054	1.18949e-304	308.303	303.925	Septin9
0	0.762672	0.425	0.191	1.18949e-304	308.303	303.925	Ppp2r1a
0	0.806423	0.407	0.173	1.18949e-304	308.303	303.925	Txnl4a
0	0.375546	0.697	0.463	1.18949e-304	308.303	303.925	Ssb
0	0.560994	0.801	0.568	1.18949e-304	308.303	303.925	Tln1
0	2.55334	0.278	0.045	1.18949e-304	308.303	303.925	Ccr1
0	0.33141	0.468	0.235	1.18949e-304	308.303	303.925	Hpcal1
0	0.297675	0.541	0.308	1.18949e-304	308.303	303.925	Renbp
0	3.17385	0.265	0.032	1.18949e-304	308.303	303.925	Cenpa
0	0.631	0.378	0.145	1.18949e-304	308.303	303.925	Washc5
0	0.316846	0.735	0.502	1.18949e-304	308.303	303.925	Gas5
0	0.554226	0.475	0.242	1.18949e-304	308.303	303.925	Kdelr2
0	0.251058	0.593	0.36	1.18949e-304	308.303	303.925	Eif1b
0	1.84606	0.301	0.068	1.18949e-304	308.303	303.925	Ppa1
0	1.01417	0.912	0.679	1.18949e-304	308.303	303.925	Rps7
0	0.28358	0.631	0.398	1.18949e-304	308.303	303.925	Arf4
0	-1.58308	0.556	0.789	1.18949e-304	308.303	303.925	St3gal6
0	0.485484	0.485	0.252	1.18949e-304	308.303	303.925	Tmem179b
0	1.20028	0.931	0.699	1.18949e-304	308.303	303.925	Rps16
0	1.23003	0.342	0.11	1.18949e-304	308.303	303.925	Fmc1
0	0.108963	0.528	0.296	1.18949e-304	308.303	303.925	Pcbd2
0	0.37257	0.562	0.33	1.18949e-304	308.303	303.925	Ap1s2
0	0.762954	0.401	0.169	1.18949e-304	308.303	303.925	Asnsd1
0	0.678975	0.437	0.205	1.18949e-304	308.303	303.925	Aph1a
0	2.28801	0.263	0.031	1.18949e-304	308.303	303.925	Shtn1
0	0.422791	0.476	0.244	1.18949e-304	308.303	303.925	Trappc3
0	0.567375	0.41	0.178	1.18949e-304	308.303	303.925	Tbc1d1
0	0.800835	0.36	0.128	1.18949e-304	308.303	303.925	Stxbp2
0	0.24038	0.619	0.387	1.18949e-304	308.303	303.925	Tmbim4
0	0.355991	0.612	0.38	1.18949e-304	308.303	303.925	BC005537
0	0.267693	0.673	0.442	1.18949e-304	308.303	303.925	Atp6ap2
0	1.54595	0.321	0.09	1.18949e-304	308.303	303.925	Sap30
0	0.517221	0.453	0.222	1.18949e-304	308.303	303.925	Samm50
0	1.14222	0.474	0.243	1.18949e-304	308.303	303.925	Phgdh
0	0.224665	0.703	0.472	1.18949e-304	308.303	303.925	Pnp
0	1.21149	0.361	0.13	1.18949e-304	308.303	303.925	Eif1ad
0	0.368372	0.54	0.31	1.18949e-304	308.303	303.925	Ywhag
0	0.676002	0.405	0.175	1.18949e-304	308.303	303.925	Mrps25
0	0.912903	0.381	0.151	1.18949e-304	308.303	303.925	Dtymk
0	0.863214	0.383	0.153	1.18949e-304	308.303	303.925	Pigt
0	0.594921	0.452	0.222	1.18949e-304	308.303	303.925	Naxe
0	0.630439	0.445	0.215	1.18949e-304	308.303	303.925	Gm11808
0	0.455625	0.442	0.212	1.18949e-304	308.303	303.925	Agpat5
0	0.871091	0.379	0.149	1.18949e-304	308.303	303.925	Mrpl4
0	0.56617	0.453	0.223	1.18949e-304	308.303	303.925	Sar1a
0	1.4384	0.325	0.095	1.18949e-304	308.303	303.925	Pno1
0	0.874633	0.389	0.159	1.18949e-304	308.303	303.925	Gaa
0	0.638491	0.451	0.221	1.18949e-304	308.303	303.925	Uqcc3
0	0.835548	0.388	0.158	1.18949e-304	308.303	303.925	Scd2
0	0.845935	0.901	0.671	1.18949e-304	308.303	303.925	Rpl9
0	1.03449	0.909	0.679	1.18949e-304	308.303	303.925	Rpl6
0	0.858074	0.413	0.183	1.18949e-304	308.303	303.925	Pilra
0	0.88778	0.87	0.64	1.18949e-304	308.303	303.925	Hspa8
0	0.225892	0.715	0.485	1.18949e-304	308.303	303.925	Ccdc12
0	1.06143	0.357	0.127	1.18949e-304	308.303	303.925	Dhrs1
0	0.201442	0.569	0.339	1.18949e-304	308.303	303.925	Psmd14
0	0.31442	0.691	0.461	1.18949e-304	308.303	303.925	Caprin1
0	0.502449	0.798	0.569	1.18949e-304	308.303	303.925	Morf4l1
0	0.359075	0.534	0.305	1.18949e-304	308.303	303.925	Rtf2
0	0.355883	0.444	0.215	1.18949e-304	308.303	303.925	Slc16a10
0	1.82288	0.318	0.089	1.18949e-304	308.303	303.925	Phf11b
0	0.759688	0.416	0.187	1.18949e-304	308.303	303.925	Strap
0	0.770923	0.838	0.609	1.18949e-304	308.303	303.925	Gnai2
0	0.789421	0.407	0.178	1.18949e-304	308.303	303.925	Erh
0	0.652474	0.423	0.194	1.18949e-304	308.303	303.925	Gfer
0	0.824343	0.358	0.129	1.18949e-304	308.303	303.925	Cpt1a
0	1.28996	0.936	0.708	1.18949e-304	308.303	303.925	Rpl19
0	0.729058	0.661	0.433	1.18949e-304	308.303	303.925	Apobec1
0	0.889924	0.39	0.162	1.18949e-304	308.303	303.925	Elovl1
0	0.496918	0.456	0.228	1.18949e-304	308.303	303.925	Utp3
0	0.15682	0.626	0.398	1.18949e-304	308.303	303.925	Sumo1
0	0.262207	0.607	0.379	1.18949e-304	308.303	303.925	Eif4h
0	1.41712	0.95	0.722	1.18949e-304	308.303	303.925	Rpl32
0	0.348356	0.622	0.394	1.18949e-304	308.303	303.925	Ctnnb1
0	1.85218	0.286	0.058	1.18949e-304	308.303	303.925	Snrnp25
0	1.28335	0.947	0.719	1.18949e-304	308.303	303.925	Rps28
0	0.295859	0.548	0.321	1.18949e-304	308.303	303.925	Aamp
0	1.15306	0.399	0.172	1.18949e-304	308.303	303.925	Zfas1
0	0.771872	0.4	0.173	1.18949e-304	308.303	303.925	Ebna1bp2
0	0.365345	0.662	0.435	1.18949e-304	308.303	303.925	Rab1a
0	-1.65203	0.429	0.656	1.18949e-304	308.303	303.925	Rtn1
0	0.296222	0.537	0.31	1.18949e-304	308.303	303.925	Hnrnpul2
0	1.41619	0.314	0.087	1.18949e-304	308.303	303.925	Gcsh
0	0.772823	0.418	0.191	1.18949e-304	308.303	303.925	Paics
0	0.413298	0.478	0.251	1.18949e-304	308.303	303.925	Plekhj1
0	0.710585	0.409	0.182	1.18949e-304	308.303	303.925	Mybbp1a
0	-1.40171	0.687	0.914	1.18949e-304	308.303	303.925	Gm2629
0	0.30662	0.563	0.336	1.18949e-304	308.303	303.925	Selenot
0	0.199123	0.536	0.31	1.18949e-304	308.303	303.925	Dnajb14
0	0.538154	0.461	0.235	1.18949e-304	308.303	303.925	Csf2rb
0	1.31425	0.327	0.101	1.18949e-304	308.303	303.925	Mgst3
0	-1.64894	0.391	0.617	1.18949e-304	308.303	303.925	Pard3b
0	0.478383	0.472	0.246	1.18949e-304	308.303	303.925	Arl8a
0	0.165866	0.753	0.527	1.18949e-304	308.303	303.925	Tmem50a
0	0.862401	0.821	0.595	1.18949e-304	308.303	303.925	Ctsc
0	0.647435	0.408	0.182	1.18949e-304	308.303	303.925	Emc8
0	0.737529	0.833	0.607	1.18949e-304	308.303	303.925	Plek
0	1.44994	0.298	0.072	1.18949e-304	308.303	303.925	Pygl
0	0.289191	0.588	0.362	1.18949e-304	308.303	303.925	Mtch1
0	0.242402	0.604	0.378	1.18949e-304	308.303	303.925	Zfp91
0	0.286466	0.692	0.466	1.18949e-304	308.303	303.925	Chd4
0	0.280169	0.567	0.341	1.18949e-304	308.303	303.925	Supt16
0	0.23404	0.799	0.574	1.18949e-304	308.303	303.925	Tmbim6
0	0.266966	0.537	0.312	1.18949e-304	308.303	303.925	Mrpl24
0	1.05683	0.327	0.102	1.18949e-304	308.303	303.925	Fblim1
0	0.593203	0.467	0.242	1.18949e-304	308.303	303.925	Bub3
0	0.510718	0.446	0.221	1.18949e-304	308.303	303.925	Mrps17
0	0.520336	0.452	0.227	1.18949e-304	308.303	303.925	Fbl
0	0.693467	0.456	0.231	1.18949e-304	308.303	303.925	Rbbp7
0	1.23159	0.938	0.713	1.18949e-304	308.303	303.925	Rps20
0	0.370835	0.627	0.402	1.18949e-304	308.303	303.925	Dhrs3
0	0.330845	0.771	0.546	1.18949e-304	308.303	303.925	Eif4g2
0	-1.47679	0.616	0.841	1.18949e-304	308.303	303.925	Rapgef5
0	0.935552	0.919	0.695	1.18949e-304	308.303	303.925	Rpl13a
0	0.331716	0.555	0.331	1.18949e-304	308.303	303.925	G3bp1
0	0.44963	0.513	0.289	1.18949e-304	308.303	303.925	Ifi27
0	0.658241	0.397	0.173	1.18949e-304	308.303	303.925	Mrpl32
0	0.835075	0.373	0.149	1.18949e-304	308.303	303.925	Apip
0	1.55543	0.311	0.087	1.18949e-304	308.303	303.925	Slc16a3
0	2.14295	0.311	0.087	1.18949e-304	308.303	303.925	Cks2
0	0.466983	0.447	0.223	1.18949e-304	308.303	303.925	Chrac1
0	1.68945	0.37	0.146	1.18949e-304	308.303	303.925	D17H6S56E-5
0	0.586568	0.415	0.191	1.18949e-304	308.303	303.925	Rbm17
0	0.208829	0.607	0.383	1.18949e-304	308.303	303.925	Ddrgk1
0	3.55095	0.24	0.016	1.18949e-304	308.303	303.925	Fam20c
0	0.290498	0.625	0.401	1.18949e-304	308.303	303.925	Arl8b
0	1.01256	0.356	0.132	1.18949e-304	308.303	303.925	Gm5617
0	1.03453	0.353	0.129	1.18949e-304	308.303	303.925	Ndufaf3
0	0.388551	0.491	0.267	1.18949e-304	308.303	303.925	Rps27rt
0	0.623272	0.421	0.197	1.18949e-304	308.303	303.925	Lsm7
0	0.193808	0.613	0.389	1.18949e-304	308.303	303.925	Ddx24
0	0.181447	0.564	0.34	1.18949e-304	308.303	303.925	Syf2
0	1.16888	0.932	0.709	1.18949e-304	308.303	303.925	Rps15a
0	0.228414	0.681	0.458	1.18949e-304	308.303	303.925	Anp32a
0	0.335655	0.52	0.297	1.18949e-304	308.303	303.925	Skp1
0	0.569947	0.461	0.238	1.18949e-304	308.303	303.925	Eif4a3
0	2.26026	0.271	0.048	1.18949e-304	308.303	303.925	Nt5dc2
0	0.24945	0.648	0.425	1.18949e-304	308.303	303.925	Hcls1
0	1.12137	0.372	0.149	1.18949e-304	308.303	303.925	Ccdc34
0	3.56634	0.234	0.011	1.18949e-304	308.303	303.925	Bcar3
0	2.85074	0.253	0.03	1.18949e-304	308.303	303.925	Oasl2
0	6.84198	0.226	0.003	1.18949e-304	308.303	303.925	Acp5
0	0.738751	0.382	0.159	1.18949e-304	308.303	303.925	Bad
0	1.46647	0.344	0.121	1.18949e-304	308.303	303.925	Mcm3
0	0.930429	0.361	0.138	1.18949e-304	308.303	303.925	Mrps26
0	0.372989	0.732	0.509	1.18949e-304	308.303	303.925	Fcgr1
0	-1.48936	0.62	0.843	1.18949e-304	308.303	303.925	Chn2
0	0.239257	0.579	0.356	1.18949e-304	308.303	303.925	Sec11a
0	0.511475	0.848	0.625	1.18949e-304	308.303	303.925	Ubb
0	2.0044	0.308	0.085	1.18949e-304	308.303	303.925	Tnfaip2
0	1.89887	0.286	0.063	1.18949e-304	308.303	303.925	Rtp4
0	0.33653	0.502	0.279	1.18949e-304	308.303	303.925	Igbp1
0	0.259744	0.566	0.343	1.18949e-304	308.303	303.925	1110004F10Rik
0	0.30707	0.531	0.309	1.18949e-304	308.303	303.925	Tgoln1
0	0.307316	0.52	0.298	1.18949e-304	308.303	303.925	Slc25a11
0	1.09211	0.341	0.119	1.18949e-304	308.303	303.925	Mrpl40
0	0.33289	0.529	0.307	1.18949e-304	308.303	303.925	U2af1
0	0.646068	0.371	0.149	1.18949e-304	308.303	303.925	B4galt5
0	6.61351	0.224	0.002	1.18949e-304	308.303	303.925	4930430E12Rik
0	2.27898	0.244	0.022	1.18949e-304	308.303	303.925	Chchd10
0	0.82853	0.376	0.154	1.18949e-304	308.303	303.925	Rps19bp1
0	0.936362	0.348	0.126	1.18949e-304	308.303	303.925	Prelid3b
0	0.295899	0.594	0.372	1.18949e-304	308.303	303.925	Adam15
0	0.989591	0.35	0.128	1.18949e-304	308.303	303.925	Nipsnap3b
0	0.296554	0.695	0.473	1.18949e-304	308.303	303.925	Edem1
0	0.289269	0.501	0.279	1.18949e-304	308.303	303.925	Rab4b
0	0.202475	0.572	0.35	1.18949e-304	308.303	303.925	Copb1
0	0.91532	0.357	0.135	1.18949e-304	308.303	303.925	Nudcd2
0	0.335683	0.499	0.277	1.18949e-304	308.303	303.925	Marchf5
0	0.64361	0.42	0.198	1.18949e-304	308.303	303.925	Dynlt3
0	1.05127	0.926	0.705	1.18949e-304	308.303	303.925	Rpl11
0	1.02913	0.931	0.71	1.18949e-304	308.303	303.925	Rplp2
0	0.705363	0.398	0.177	1.18949e-304	308.303	303.925	Gemin7
0	0.731741	0.405	0.184	1.18949e-304	308.303	303.925	Rpl10-ps3
0	0.531796	0.449	0.228	1.18949e-304	308.303	303.925	Vamp3
0	0.865364	0.366	0.145	1.18949e-304	308.303	303.925	Gtf3a
0	0.695898	0.392	0.171	1.18949e-304	308.303	303.925	Rpp21
0	0.337736	0.723	0.502	1.18949e-304	308.303	303.925	Ppt1
0	0.380994	0.349	0.128	1.18949e-304	308.303	303.925	Hip1
0	1.72253	0.289	0.068	1.18949e-304	308.303	303.925	Galk1
0	0.271731	0.625	0.404	1.18949e-304	308.303	303.925	Eif4g1
0	0.312242	0.502	0.282	1.18949e-304	308.303	303.925	BC005624
0	0.100311	0.646	0.426	1.18949e-304	308.303	303.925	Ndufs4
0	0.247376	0.66	0.44	1.18949e-304	308.303	303.925	Il10rb
0	0.803012	0.406	0.186	1.18949e-304	308.303	303.925	Pgp
0	0.367348	0.43	0.21	1.18949e-304	308.303	303.925	Szrd1
0	0.28172	0.497	0.277	1.18949e-304	308.303	303.925	Fam174a
0	0.345765	0.746	0.526	1.18949e-304	308.303	303.925	Tpr
0	0.576659	0.417	0.197	1.18949e-304	308.303	303.925	Ctbp1
0	0.97474	0.356	0.136	1.18949e-304	308.303	303.925	Med29
0	1.73656	0.288	0.068	1.18949e-304	308.303	303.925	Polr2l
0	0.50122	0.479	0.259	1.18949e-304	308.303	303.925	Tspan4
0	0.197363	0.586	0.366	1.18949e-304	308.303	303.925	Dnase2a
0	1.61898	0.285	0.065	1.18949e-304	308.303	303.925	Hmbs
0	0.589122	0.409	0.189	1.18949e-304	308.303	303.925	Ipo5
0	0.187792	0.599	0.379	1.18949e-304	308.303	303.925	Ppp1r18
0	0.346522	0.758	0.538	1.18949e-304	308.303	303.925	Tm9sf3
0	0.317751	0.571	0.351	1.18949e-304	308.303	303.925	Smc1a
0	0.98529	0.918	0.699	1.18949e-304	308.303	303.925	Rps13
0	0.32428	0.502	0.283	1.18949e-304	308.303	303.925	Eif4e
0	0.19362	0.549	0.33	1.18949e-304	308.303	303.925	Aup1
0	0.471306	0.455	0.236	1.18949e-304	308.303	303.925	Fam32a
0	1.13435	0.331	0.112	1.18949e-304	308.303	303.925	Plekho2
0	0.719325	0.38	0.161	1.18949e-304	308.303	303.925	Bccip
0	0.102308	0.486	0.267	1.18949e-304	308.303	303.925	Mrps28
0	0.311335	0.498	0.279	1.18949e-304	308.303	303.925	Arpc1a
0	0.416425	0.48	0.261	1.18949e-304	308.303	303.925	Igsf6
0	0.11431	0.611	0.392	1.18949e-304	308.303	303.925	Gabarapl2
0	0.966611	0.913	0.695	1.18949e-304	308.303	303.925	Rpl17
0	0.717314	0.394	0.176	1.18949e-304	308.303	303.925	Sdhaf4
0	0.215026	0.664	0.446	1.18949e-304	308.303	303.925	Csde1
0	0.349044	0.504	0.286	1.18949e-304	308.303	303.925	Ndufa9
0	0.194313	0.642	0.424	1.18949e-304	308.303	303.925	Kras
0	0.676655	0.396	0.178	1.18949e-304	308.303	303.925	Polr2c
0	0.637028	0.391	0.173	1.18949e-304	308.303	303.925	Faim
0	0.44276	0.456	0.238	1.18949e-304	308.303	303.925	Acaa1a
0	0.327064	0.518	0.3	1.18949e-304	308.303	303.925	0610010K14Rik
0	0.320732	0.462	0.244	1.18949e-304	308.303	303.925	Bltp2
0	0.266932	0.554	0.336	1.18949e-304	308.303	303.925	Lman1
0	0.401433	0.439	0.221	1.18949e-304	308.303	303.925	Mrpl48
0	0.651744	0.386	0.168	1.18949e-304	308.303	303.925	Ndufv1
0	0.798241	0.385	0.167	1.18949e-304	308.303	303.925	Timm17b
0	0.140893	0.623	0.405	1.18949e-304	308.303	303.925	Lrrfip1
0	1.13006	0.3	0.082	1.18949e-304	308.303	303.925	Adap1
0	2.11522	0.285	0.067	1.18949e-304	308.303	303.925	Lig1
0	0.385062	0.477	0.259	1.18949e-304	308.303	303.925	Clptm1
0	0.269052	0.584	0.366	1.18949e-304	308.303	303.925	Tecr
0	1.51825	0.3	0.082	1.18949e-304	308.303	303.925	Cmc2
0	0.360666	0.495	0.277	1.18949e-304	308.303	303.925	Smim15
0	0.168632	0.57	0.352	1.18949e-304	308.303	303.925	Mcts1
0	0.16477	0.637	0.42	1.18949e-304	308.303	303.925	Bnip2
0	0.65134	0.394	0.177	1.18949e-304	308.303	303.925	Ctdnep1
0	0.435495	0.461	0.244	1.18949e-304	308.303	303.925	Prpf8
0	2.01931	0.279	0.062	1.18949e-304	308.303	303.925	H2-Eb1
0	0.631304	0.38	0.163	1.18949e-304	308.303	303.925	Qdpr
0	0.567142	0.429	0.212	1.18949e-304	308.303	303.925	Lrp10
0	3.07968	0.246	0.029	1.18949e-304	308.303	303.925	Ms4a4c
0	2.27171	0.24	0.023	1.18949e-304	308.303	303.925	Anxa1
0	0.135679	0.599	0.382	1.18949e-304	308.303	303.925	Pdcd10
0	0.532737	0.817	0.6	1.18949e-304	308.303	303.925	Ywhae
0	0.352727	0.742	0.525	1.18949e-304	308.303	303.925	Pcbp2
0	0.218292	0.584	0.367	1.18949e-304	308.303	303.925	Tapbp
0	0.579153	0.39	0.174	1.18949e-304	308.303	303.925	Hikeshi
0	0.290742	0.537	0.321	1.18949e-304	308.303	303.925	Dbnl
0	3.93819	0.224	0.008	1.18949e-304	308.303	303.925	Cd38
0	0.691385	0.383	0.167	1.18949e-304	308.303	303.925	Mocs2
0	3.00897	0.239	0.023	1.18949e-304	308.303	303.925	Tubb6
0	0.475381	0.434	0.218	1.18949e-304	308.303	303.925	Ddb1
0	0.322251	0.493	0.277	1.18949e-304	308.303	303.925	Tex261
0	0.368416	0.473	0.257	1.18949e-304	308.303	303.925	Commd6
0	0.204093	0.466	0.251	1.18949e-304	308.303	303.925	Washc3
0	0.374918	0.442	0.227	1.18949e-304	308.303	303.925	Ak2
0	4.89168	0.229	0.014	1.18949e-304	308.303	303.925	Ifitm1
0	0.176182	0.608	0.393	1.18949e-304	308.303	303.925	Psmc6
0	-1.52258	0.399	0.614	1.18949e-304	308.303	303.925	Slc1a3
0	1.52793	0.287	0.072	1.18949e-304	308.303	303.925	Aldh3b1
0	0.921505	0.353	0.138	1.18949e-304	308.303	303.925	Yif1a
0	0.19285	0.595	0.38	1.18949e-304	308.303	303.925	Magt1
0	0.228024	0.515	0.301	1.18949e-304	308.303	303.925	Srp72
0	0.240305	0.502	0.288	1.18949e-304	308.303	303.925	Ugp2
0	0.294932	0.522	0.308	1.18949e-304	308.303	303.925	Lasp1
0	0.683151	0.392	0.178	1.18949e-304	308.303	303.925	Flot1
0	0.786768	0.355	0.141	1.18949e-304	308.303	303.925	1600014C10Rik
0	0.967318	0.436	0.222	1.18949e-304	308.303	303.925	Lsp1
0	0.433123	0.431	0.217	1.18949e-304	308.303	303.925	ENSMUSG00000121485
0	0.222351	0.592	0.378	1.18949e-304	308.303	303.925	Arl4c
0	0.133857	0.689	0.475	1.18949e-304	308.303	303.925	Rnpep
0	0.341178	0.707	0.493	1.18949e-304	308.303	303.925	Mcl1
0	0.442463	0.413	0.199	1.18949e-304	308.303	303.925	Gatad1
0	0.387267	0.476	0.262	1.18949e-304	308.303	303.925	Cib1
0	0.168452	0.494	0.28	1.18949e-304	308.303	303.925	Stx4a
0	-1.48737	0.601	0.815	1.18949e-304	308.303	303.925	Large1
0	1.94039	0.284	0.07	1.18949e-304	308.303	303.925	Dnajc9
0	0.624785	0.41	0.196	1.18949e-304	308.303	303.925	Cnih1
0	1.14099	0.353	0.139	1.18949e-304	308.303	303.925	Atad2
0	0.359139	0.793	0.58	1.18949e-304	308.303	303.925	Rac1
0	0.336937	0.776	0.563	1.18949e-304	308.303	303.925	Itgb1
0	2.58133	0.256	0.043	1.18949e-304	308.303	303.925	Mcm6
0	2.11004	0.259	0.046	1.18949e-304	308.303	303.925	Pmf1
0	2.9034	0.232	0.019	1.18949e-304	308.303	303.925	Gas2l3
0	0.931765	0.343	0.13	1.18949e-304	308.303	303.925	Mrpl55
0	0.282559	0.465	0.252	1.18949e-304	308.303	303.925	Flii
0	0.807891	0.333	0.12	1.18949e-304	308.303	303.925	Trim25
0	0.682473	0.385	0.172	1.18949e-304	308.303	303.925	Aarsd1
0	0.252223	0.541	0.328	1.18949e-304	308.303	303.925	Sypl
0	0.226122	0.462	0.249	1.18949e-304	308.303	303.925	Mphosph8
0	0.21822	0.5	0.287	1.18949e-304	308.303	303.925	Wbp4
0	1.90446	0.267	0.054	1.18949e-304	308.303	303.925	Incenp
0	0.726591	0.365	0.152	1.18949e-304	308.303	303.925	Pih1d1
0	-1.4358	0.514	0.727	1.18949e-304	308.303	303.925	Magi1
0	-1.9061	0.2	0.413	1.18949e-304	308.303	303.925	Nr3c2
0	0.165056	0.597	0.384	1.18949e-304	308.303	303.925	Pdcd6ip
0	0.716098	0.799	0.587	1.18949e-304	308.303	303.925	Timp2
0	3.23153	0.232	0.02	1.18949e-304	308.303	303.925	Cd36
0	0.241074	0.663	0.451	1.18949e-304	308.303	303.925	Hnrnpd
0	0.196683	0.52	0.308	1.18949e-304	308.303	303.925	Anapc15
0	2.17482	0.281	0.069	1.18949e-304	308.303	303.925	Rrm1
0	2.75741	0.231	0.019	1.18949e-304	308.303	303.925	Adgb
0	0.196741	0.548	0.336	1.18949e-304	308.303	303.925	Arl1
0	0.112099	0.644	0.432	1.18949e-304	308.303	303.925	Sarnp
0	0.332612	0.623	0.411	1.18949e-304	308.303	303.925	Eif5
0	0.469378	0.453	0.241	1.18949e-304	308.303	303.925	Vegfb
0	0.714528	0.371	0.159	1.18949e-304	308.303	303.925	Commd9
0	0.291037	0.433	0.221	1.18949e-304	308.303	303.925	Arhgap18
0	0.901281	0.349	0.137	1.18949e-304	308.303	303.925	Dnlz
0	1.34466	0.948	0.736	1.18949e-304	308.303	303.925	Rps8
0	0.161435	0.699	0.487	1.18949e-304	308.303	303.925	Tax1bp1
0	1.4315	0.292	0.08	1.18949e-304	308.303	303.925	Sephs2
0	0.661604	0.351	0.139	1.18949e-304	308.303	303.925	Gipc1
0	0.190849	0.592	0.38	1.18949e-304	308.303	303.925	Limd2
0	0.594165	0.855	0.643	1.18949e-304	308.303	303.925	Ly6e
0	0.93417	0.87	0.658	1.18949e-304	308.303	303.925	Mpeg1
0	1.47891	0.314	0.103	1.18949e-304	308.303	303.925	Rhoc
0	0.175213	0.538	0.327	1.18949e-304	308.303	303.925	Arl6ip5
0	0.167717	0.531	0.32	1.18949e-304	308.303	303.925	Vps26a
0	0.628317	0.386	0.175	1.18949e-304	308.303	303.925	Nrbf2
0	0.268155	0.64	0.429	1.18949e-304	308.303	303.925	Ptges3
0	0.136031	0.621	0.41	1.18949e-304	308.303	303.925	Ppp2ca
0	1.03365	0.336	0.125	1.18949e-304	308.303	303.925	Mrps23
0	0.222787	0.499	0.288	1.18949e-304	308.303	303.925	Smarce1
0	0.531722	0.4	0.189	1.18949e-304	308.303	303.925	Ncbp2
0	0.38165	0.529	0.318	1.18949e-304	308.303	303.925	Fam111a
0	0.0643581	0.551	0.34	1.18949e-304	308.303	303.925	Bbip1
0	6.31293	0.214	0.003	1.18949e-304	308.303	303.925	Cdca3
0	-1.78193	0.23	0.441	1.18949e-304	308.303	303.925	Dlc1
0	0.504745	0.419	0.208	1.18949e-304	308.303	303.925	Smim7
0	0.657526	0.379	0.168	1.18949e-304	308.303	303.925	Med10
0	0.866817	0.376	0.165	1.18949e-304	308.303	303.925	Cbx5
0	0.453381	0.435	0.224	1.18949e-304	308.303	303.925	Tlr13
0	0.164668	0.576	0.365	1.18949e-304	308.303	303.925	Eif3j1
0	1.49053	0.285	0.074	1.18949e-304	308.303	303.925	B4galnt1
0	0.425267	0.565	0.354	1.18949e-304	308.303	303.925	2410006H16Rik
0	0.227632	0.48	0.269	1.18949e-304	308.303	303.925	Tep1
0	-1.48484	0.716	0.926	1.18949e-304	308.303	303.925	Plcl1
0	0.6982	0.382	0.172	1.18949e-304	308.303	303.925	Tor2a
0	1.06684	0.328	0.118	1.18949e-304	308.303	303.925	Mrto4
0	0.912783	0.341	0.131	1.18949e-304	308.303	303.925	Xaf1
0	0.412821	0.461	0.251	1.18949e-304	308.303	303.925	Dhrs7
0	0.532224	0.373	0.163	1.18949e-304	308.303	303.925	Slc31a1
0	0.836239	0.359	0.149	1.18949e-304	308.303	303.925	Arf6
0	0.361285	0.444	0.234	1.18949e-304	308.303	303.925	Actr10
0	0.462193	0.431	0.221	1.18949e-304	308.303	303.925	Polr1h
0	0.263284	0.73	0.52	1.18949e-304	308.303	303.925	AU020206
0	0.323514	0.758	0.548	1.18949e-304	308.303	303.925	Myh9
0	0.542428	0.409	0.199	1.18949e-304	308.303	303.925	Ndufb4
0	0.928338	0.929	0.72	1.18949e-304	308.303	303.925	Rpl34
0	1.56033	0.281	0.072	1.18949e-304	308.303	303.925	Sdc4
0	0.907165	0.343	0.134	1.18949e-304	308.303	303.925	Stoml2
0	2.10352	0.256	0.047	1.18949e-304	308.303	303.925	Fgl2
0	3.30824	0.224	0.015	1.18949e-304	308.303	303.925	Mt2
0	0.258586	0.46	0.251	1.18949e-304	308.303	303.925	Glb1
0	0.365668	0.445	0.236	1.18949e-304	308.303	303.925	Rnf187
0	0.196516	0.677	0.468	1.18949e-304	308.303	303.925	Abr
0	0.498069	0.399	0.19	1.18949e-304	308.303	303.925	Anxa7
0	0.98292	0.317	0.108	1.18949e-304	308.303	303.925	Nol12
0	0.107861	0.53	0.321	1.18949e-304	308.303	303.925	Slk
0	0.930139	0.332	0.123	1.18949e-304	308.303	303.925	Pdzd11
0	0.820031	0.352	0.143	1.18949e-304	308.303	303.925	Ddx54
0	2.46037	0.241	0.032	1.18949e-304	308.303	303.925	Plbd1
0	0.131124	0.485	0.276	1.18949e-304	308.303	303.925	Smarca4
0	0.592525	0.473	0.264	1.18949e-304	308.303	303.925	Sgk1
0	0.259479	0.603	0.394	1.18949e-304	308.303	303.925	H2-DMa
0	0.113766	0.561	0.353	1.18949e-304	308.303	303.925	Zc3h15
0	0.206189	0.503	0.295	1.18949e-304	308.303	303.925	Vapb
0	0.883185	0.315	0.107	1.18949e-304	308.303	303.925	Bach2os
0	0.0485113	0.626	0.418	1.18949e-304	308.303	303.925	Iscu
0	0.239766	0.467	0.259	1.18949e-304	308.303	303.925	Supt5
0	0.150661	0.549	0.341	1.18949e-304	308.303	303.925	Frg1
0	0.189137	0.55	0.342	1.18949e-304	308.303	303.925	Rab21
0	0.201365	0.517	0.309	1.18949e-304	308.303	303.925	Snw1
0	0.470955	0.421	0.213	1.18949e-304	308.303	303.925	Spag7
0	0.181415	0.711	0.503	1.18949e-304	308.303	303.925	Septin7
0	0.962736	0.93	0.723	1.18949e-304	308.303	303.925	Rps14
0	1.49134	0.273	0.066	1.18949e-304	308.303	303.925	Ift22
0	3.37863	0.222	0.015	1.18949e-304	308.303	303.925	Spc24
0	0.664734	0.385	0.178	1.18949e-304	308.303	303.925	Pfkl
0	0.163811	0.526	0.319	1.18949e-304	308.303	303.925	Sar1b
0	-1.83817	0.176	0.383	1.18949e-304	308.303	303.925	Gm40841
0	0.309353	0.459	0.252	1.18949e-304	308.303	303.925	Eif2ak2
0	0.342176	0.652	0.445	1.18949e-304	308.303	303.925	Cyb5a
0	0.347849	0.463	0.256	1.18949e-304	308.303	303.925	Hnrnph2
0	3.89052	0.22	0.013	1.18949e-304	308.303	303.925	Cxcr4
0	1.24251	0.296	0.089	1.18949e-304	308.303	303.925	Lxn
0	4.85161	0.212	0.005	1.18949e-304	308.303	303.925	Fabp3
0	0.450196	0.412	0.205	1.18949e-304	308.303	303.925	Pak1ip1
0	5.54996	0.211	0.004	1.18949e-304	308.303	303.925	Igf2r
0	0.0857621	0.578	0.371	1.18949e-304	308.303	303.925	Zfp106
0	0.234903	0.74	0.533	1.18949e-304	308.303	303.925	Vapa
0	0.163226	0.588	0.381	1.18949e-304	308.303	303.925	Hsd17b4
0	0.284052	0.535	0.329	1.18949e-304	308.303	303.925	Tmem37
0	0.314845	0.401	0.195	1.18949e-304	308.303	303.925	Dnajc10
0	0.299288	0.465	0.259	1.18949e-304	308.303	303.925	Alg5
0	0.191881	0.505	0.299	1.18949e-304	308.303	303.925	Erp44
0	0.734141	0.33	0.124	1.18949e-304	308.303	303.925	Snhg3
0	0.312612	0.46	0.254	1.18949e-304	308.303	303.925	Nfu1
0	0.719823	0.337	0.131	1.18949e-304	308.303	303.925	Mvp
0	2.72306	0.229	0.023	1.18949e-304	308.303	303.925	Fuom
0	0.132643	0.542	0.336	1.18949e-304	308.303	303.925	Srpr
0	0.942781	0.312	0.106	1.18949e-304	308.303	303.925	Ero1a
0	0.185031	0.495	0.289	1.18949e-304	308.303	303.925	Ctnna1
0	0.684974	0.342	0.136	1.18949e-304	308.303	303.925	Me2
0	0.569783	0.406	0.2	1.18949e-304	308.303	303.925	Fam89b
0	0.401667	0.419	0.213	1.18949e-304	308.303	303.925	Uchl5
0	0.391544	0.425	0.219	1.18949e-304	308.303	303.925	Bet1
0	0.573475	0.411	0.205	1.18949e-304	308.303	303.925	Prmt1
0	0.390934	0.417	0.211	1.18949e-304	308.303	303.925	Eci2
0	0.412107	0.407	0.201	1.18949e-304	308.303	303.925	Peds1
0	-1.41802	0.507	0.713	1.18949e-304	308.303	303.925	Ank2
0	0.0540408	0.603	0.397	1.18949e-304	308.303	303.925	Sirt2
0	-1.33106	0.714	0.919	1.18949e-304	308.303	303.925	Mir99ahg
0	0.126815	0.658	0.453	1.18949e-304	308.303	303.925	Tram1
0	0.783833	0.518	0.313	1.18949e-304	308.303	303.925	Npl
0	0.605165	0.387	0.182	1.18949e-304	308.303	303.925	Scamp3
0	-1.59386	0.285	0.49	1.18949e-304	308.303	303.925	Whrn
0	0.0807985	0.613	0.408	1.18949e-304	308.303	303.925	Mob1a
0	0.951475	0.322	0.117	1.18949e-304	308.303	303.925	Nherf1
0	0.677792	0.367	0.162	1.18949e-304	308.303	303.925	Igsf8
0	0.664154	0.365	0.16	1.18949e-304	308.303	303.925	Hyou1
0	0.812795	0.367	0.162	1.18949e-304	308.303	303.925	Apex1
0	0.687864	0.353	0.148	1.18949e-304	308.303	303.925	Tars
0	2.13868	0.243	0.038	1.18949e-304	308.303	303.925	Carhsp1
0	0.982505	0.935	0.731	1.18949e-304	308.303	303.925	Rpl26
0	0.0299516	0.633	0.429	1.18949e-304	308.303	303.925	Ppig
0	0.56529	0.384	0.18	1.18949e-304	308.303	303.925	Hint2
0	0.23078	0.489	0.285	1.18949e-304	308.303	303.925	Tmem165
0	0.545336	0.39	0.186	1.18949e-304	308.303	303.925	Rfc2
0	0.814834	0.339	0.135	1.18949e-304	308.303	303.925	Ybx3
0	0.117976	0.53	0.326	1.18949e-304	308.303	303.925	Tmem219
0	0.248308	0.515	0.311	1.18949e-304	308.303	303.925	Vkorc1
0	3.14227	0.229	0.025	1.18949e-304	308.303	303.925	Irf7
0	0.804083	0.331	0.127	1.18949e-304	308.303	303.925	Txndc5
0	5.15353	0.21	0.006	1.18949e-304	308.303	303.925	Tpx2
0	0.682841	0.37	0.166	1.18949e-304	308.303	303.925	Mrps34
0	0.0586265	0.539	0.336	1.18949e-304	308.303	303.925	Cdk11b
0	0.0827147	0.491	0.288	1.18949e-304	308.303	303.925	Rnf10
0	0.102983	0.632	0.429	1.18949e-304	308.303	303.925	Chmp3
0	1.95521	0.232	0.029	1.18949e-304	308.303	303.925	Adgre5
0	0.167499	0.516	0.313	1.18949e-304	308.303	303.925	Arcn1
0	0.35518	0.406	0.203	1.18949e-304	308.303	303.925	Cs
0	0.887849	0.331	0.128	1.18949e-304	308.303	303.925	Guk1
0	0.584464	0.385	0.182	1.18949e-304	308.303	303.925	Pam16
0	0.957192	0.322	0.119	1.18949e-304	308.303	303.925	Nelfe
0	-1.8678	0.228	0.431	1.18949e-304	308.303	303.925	Ppm1l
0	0.337211	0.436	0.233	1.18949e-304	308.303	303.925	Tspan31
0	0.698452	0.345	0.142	1.18949e-304	308.303	303.925	Snap29
0	-2.1405	0.101	0.304	1.18949e-304	308.303	303.925	Setbp1
0	0.637555	0.842	0.639	1.18949e-304	308.303	303.925	Hexa
0	0.927419	0.89	0.688	1.18949e-304	308.303	303.925	Clta
0	0.969647	0.933	0.731	1.18949e-304	308.303	303.925	Rps11
0	0.191417	0.501	0.299	1.18949e-304	308.303	303.925	H13
0	-1.52607	0.466	0.668	1.18949e-304	308.303	303.925	Soga1
0	0.728593	0.338	0.136	1.18949e-304	308.303	303.925	Cox19
0	0.243075	0.458	0.256	1.18949e-304	308.303	303.925	Ilk
0	0.952754	0.335	0.133	1.18949e-304	308.303	303.925	Oat
0	1.02429	0.334	0.132	1.18949e-304	308.303	303.925	Impdh2
0	0.336999	0.507	0.305	1.18949e-304	308.303	303.925	Rnf213
0	0.139839	0.655	0.453	1.18949e-304	308.303	303.925	Plxnb2
0	1.14236	0.307	0.105	1.18949e-304	308.303	303.925	Tap1
0	0.756398	0.337	0.135	1.18949e-304	308.303	303.925	Epb41l3
0	0.551555	0.351	0.149	1.18949e-304	308.303	303.925	Gramd1b
0	0.371069	0.429	0.227	1.18949e-304	308.303	303.925	Imp3
0	0.260957	0.418	0.216	1.18949e-304	308.303	303.925	Rab24
0	0.181942	0.475	0.273	1.18949e-304	308.303	303.925	Cops5
0	0.198709	0.48	0.278	1.18949e-304	308.303	303.925	Api5
0	0.163144	0.735	0.533	1.18949e-304	308.303	303.925	Gnb1
0	0.124903	0.587	0.385	1.18949e-304	308.303	303.925	Pon2
0	-1.46111	0.483	0.684	1.18949e-304	308.303	303.925	Slc24a3
0	0.141536	0.549	0.348	1.18949e-304	308.303	303.925	Immt
0	0.24584	0.546	0.345	1.18949e-304	308.303	303.925	H2-T23
0	-1.59525	0.332	0.533	1.18949e-304	308.303	303.925	Nos1ap
0	0.792174	0.32	0.119	1.18949e-304	308.303	303.925	Fh1
0	0.0974867	0.666	0.465	1.18949e-304	308.303	303.925	Tmem234
0	0.529636	0.383	0.182	1.18949e-304	308.303	303.925	Sae1
0	1.40787	0.28	0.079	1.18949e-304	308.303	303.925	Odc1
0	4.64068	0.207	0.006	1.18949e-304	308.303	303.925	Ccnb2
0	0.8483	0.865	0.664	1.18949e-304	308.303	303.925	Arpc2
0	-1.76772	0.389	0.59	1.18949e-304	308.303	303.925	Snta1
0	0.161321	0.475	0.274	1.18949e-304	308.303	303.925	Stt3b
0	0.0805023	0.571	0.37	1.18949e-304	308.303	303.925	Xbp1
0	0.0595994	0.552	0.352	1.18949e-304	308.303	303.925	Ufsp2
0	1.97379	0.26	0.06	1.18949e-304	308.303	303.925	Ifi209
0	1.5333	0.328	0.128	1.18949e-304	308.303	303.925	Tgm2
0	-1.67399	0.341	0.541	1.18949e-304	308.303	303.925	BC035044
0	0.328791	0.45	0.25	1.18949e-304	308.303	303.925	Emc10
0	0.853242	0.326	0.126	1.18949e-304	308.303	303.925	Coa6
0	0.215697	0.449	0.249	1.18949e-304	308.303	303.925	Ccdc59
0	0.87225	0.332	0.132	1.18949e-304	308.303	303.925	Ccng1
0	2.26096	0.223	0.023	1.18949e-304	308.303	303.925	Cd300ld
0	0.280766	0.423	0.223	1.18949e-304	308.303	303.925	Suds3
0	0.508627	0.412	0.212	1.18949e-304	308.303	303.925	Tubb2a
0	0.250507	0.57	0.37	1.18949e-304	308.303	303.925	Cbx3
0	0.458244	0.603	0.403	1.18949e-304	308.303	303.925	Arid5b
0	0.464691	0.789	0.59	1.18949e-304	308.303	303.925	Pitpna
0	0.949849	0.933	0.734	1.18949e-304	308.303	303.925	Rps10
0	2.49627	0.226	0.027	1.18949e-304	308.303	303.925	Mndal
0	0.190335	0.648	0.449	1.18949e-304	308.303	303.925	Atp2a2
0	0.470438	0.378	0.179	1.18949e-304	308.303	303.925	Gars
0	1.78678	0.25	0.051	1.18949e-304	308.303	303.925	Syce2
0	0.778458	0.325	0.126	1.18949e-304	308.303	303.925	Qars
0	1.02397	0.322	0.123	1.18949e-304	308.303	303.925	Ckap4
0	0.47175	0.395	0.196	1.18949e-304	308.303	303.925	2210016F16Rik
0	0.781648	0.335	0.136	1.18949e-304	308.303	303.925	Exosc4
0	2.84007	0.223	0.024	1.18949e-304	308.303	303.925	Il2rg
0	0.672207	0.37	0.171	1.18949e-304	308.303	303.925	Ccdc115
0	0.289906	0.419	0.22	1.18949e-304	308.303	303.925	Idh3b
0	0.366905	0.43	0.231	1.18949e-304	308.303	303.925	Ppm1g
0	5.08242	0.205	0.006	1.18949e-304	308.303	303.925	Prc1
0	0.591795	0.353	0.154	1.18949e-304	308.303	303.925	Upf3a
0	0.00631063	0.565	0.366	1.18949e-304	308.303	303.925	P2rx4
0	0.0606406	0.584	0.385	1.18949e-304	308.303	303.925	Atg3
0	0.362364	0.745	0.546	1.18949e-304	308.303	303.925	Lst1
0	0.361932	0.779	0.581	1.18949e-304	308.303	303.925	Mpc1
0	0.789451	0.308	0.11	1.18949e-304	308.303	303.925	Ldlrap1
0	0.197904	0.443	0.245	1.18949e-304	308.303	303.925	Hmg20b
0	0.0926949	0.529	0.331	1.18949e-304	308.303	303.925	Dctn2
0	0.497203	0.391	0.193	1.18949e-304	308.303	303.925	Ifi35
0	0.299385	0.54	0.342	1.18949e-304	308.303	303.925	Klhl6
0	0.826939	0.334	0.136	1.18949e-304	308.303	303.925	Mrpl2
0	0.376633	0.42	0.222	1.18949e-304	308.303	303.925	Glod4
0	-2.02088	0.15	0.348	1.18949e-304	308.303	303.925	3222401L13Rik
0	0.559	0.852	0.654	1.18949e-304	308.303	303.925	Cd9
0	0.609031	0.845	0.647	1.18949e-304	308.303	303.925	Lcp1
0	-1.6763	0.365	0.562	1.18949e-304	308.303	303.925	Gm26542
0	0.163667	0.562	0.365	1.18949e-304	308.303	303.925	Npc1
0	0.713766	0.342	0.145	1.18949e-304	308.303	303.925	Bloc1s1
0	0.89419	0.323	0.126	1.18949e-304	308.303	303.925	Timm10
0	0.43702	0.395	0.198	1.18949e-304	308.303	303.925	Snrnp200
0	0.149286	0.641	0.444	1.18949e-304	308.303	303.925	Mlec
0	4.72662	0.203	0.006	1.18949e-304	308.303	303.925	Apoc1
0	0.388506	0.398	0.201	1.18949e-304	308.303	303.925	Skic8
0	0.24507	0.432	0.235	1.18949e-304	308.303	303.925	Arf3
0	0.85417	0.323	0.126	1.18949e-304	308.303	303.925	Znrd2
0	0.387099	0.369	0.172	1.18949e-304	308.303	303.925	Borcs7
0	0.727162	0.332	0.135	1.18949e-304	308.303	303.925	Pdha1
0	2.12722	0.237	0.04	1.18949e-304	308.303	303.925	Gstm1
0	0.523072	0.823	0.626	1.18949e-304	308.303	303.925	Msn
0	0.727163	0.916	0.72	1.18949e-304	308.303	303.925	Rps3a1
0	0.129424	0.561	0.365	1.18949e-304	308.303	303.925	Zfand5
0	2.39145	0.227	0.031	1.18949e-304	308.303	303.925	Axl
0	0.05063	0.522	0.326	1.18949e-304	308.303	303.925	Rp9
0	0.110609	0.479	0.283	1.18949e-304	308.303	303.925	Rassf3
0	1.06327	0.464	0.268	1.18949e-304	308.303	303.925	Ccl9
0	0.556154	0.368	0.172	1.18949e-304	308.303	303.925	Glo1
0	0.195456	0.478	0.282	1.18949e-304	308.303	303.925	Idh3g
0	0.959599	0.296	0.1	1.18949e-304	308.303	303.925	Mrpl19
0	0.366118	0.415	0.219	1.18949e-304	308.303	303.925	Wbp11
0	0.152523	0.701	0.505	1.18949e-304	308.303	303.925	Snx2
0	0.830917	0.93	0.735	1.18949e-304	308.303	303.925	Rpl18a
0	0.326345	0.402	0.207	1.18949e-304	308.303	303.925	Ddx1
0	0.382202	0.332	0.137	1.18949e-304	308.303	303.925	Dera
0	1.02995	0.278	0.083	1.18949e-304	308.303	303.925	Rnaseh2b
0	1.41368	0.258	0.063	1.18949e-304	308.303	303.925	Thoc6
0	0.884468	0.291	0.096	1.18949e-304	308.303	303.925	Paox
0	3.39692	0.207	0.012	1.18949e-304	308.303	303.925	Il3ra
0	0.0484103	0.584	0.389	1.18949e-304	308.303	303.925	Eea1
0	0.574159	0.903	0.709	1.18949e-304	308.303	303.925	Rps4x
0	0.335359	0.39	0.196	1.18949e-304	308.303	303.925	Dctn1
0	0.159072	0.459	0.265	1.18949e-304	308.303	303.925	Sec61a1
0	0.140512	0.394	0.2	1.18949e-304	308.303	303.925	Atg7
0	0.552395	0.367	0.173	1.18949e-304	308.303	303.925	Cln8
0	0.289572	0.375	0.181	1.18949e-304	308.303	303.925	Babam1
0	2.54859	0.24	0.046	1.18949e-304	308.303	303.925	H2ax
0	0.547423	0.397	0.203	1.18949e-304	308.303	303.925	Nudt4
0	0.281958	0.437	0.243	1.18949e-304	308.303	303.925	9530068E07Rik
0	0.926073	0.299	0.105	1.18949e-304	308.303	303.925	Map2k3
0	-1.60052	0.179	0.373	1.18949e-304	308.303	303.925	Gm57375
0	0.196362	0.468	0.274	1.18949e-304	308.303	303.925	Rsl1d1
0	0.111616	0.497	0.303	1.18949e-304	308.303	303.925	Cdc5l
0	0.150793	0.496	0.302	1.18949e-304	308.303	303.925	Rab18
0	0.32102	0.355	0.161	1.18949e-304	308.303	303.925	Dap3
0	0.331176	0.419	0.225	1.18949e-304	308.303	303.925	Zmpste24
0	0.61466	0.347	0.153	1.18949e-304	308.303	303.925	Tex264
0	0.598202	0.348	0.154	1.18949e-304	308.303	303.925	Ebpl
0	0.336227	0.415	0.221	1.18949e-304	308.303	303.925	Rnps1
0	0.206226	0.474	0.28	1.18949e-304	308.303	303.925	Tnfrsf1a
0	0.102294	0.57	0.376	1.18949e-304	308.303	303.925	Syngr2
0	-1.24173	0.471	0.664	1.18949e-304	308.303	303.925	Klf12
0	0.0822418	0.538	0.345	1.18949e-304	308.303	303.925	Cggbp1
0	2.77475	0.219	0.026	1.18949e-304	308.303	303.925	Tacc3
0	0.915799	0.319	0.126	1.18949e-304	308.303	303.925	Timm50
0	0.165245	0.444	0.251	1.18949e-304	308.303	303.925	Mettl9
0	0.14327	0.488	0.295	1.18949e-304	308.303	303.925	Rpl7l1
0	-1.58352	0.322	0.515	1.18949e-304	308.303	303.925	Cables1
0	1.80996	0.247	0.054	1.18949e-304	308.303	303.925	Timm8a1
0	0.621367	0.361	0.168	1.18949e-304	308.303	303.925	Imp4
0	1.06155	0.282	0.089	1.18949e-304	308.303	303.925	Thyn1
0	0.0841323	0.662	0.47	1.18949e-304	308.303	303.925	Hdlbp
0	0.286668	0.403	0.211	1.18949e-304	308.303	303.925	Nus1
0	3.77284	0.209	0.017	1.18949e-304	308.303	303.925	Cenpf
0	0.287324	0.513	0.321	1.18949e-304	308.303	303.925	Wwp1
0	0.434291	0.372	0.18	1.18949e-304	308.303	303.925	Lyrm2
0	0.276634	0.427	0.235	1.18949e-304	308.303	303.925	Map7d1
0	0.665211	0.327	0.135	1.18949e-304	308.303	303.925	Smim12
0	0.0769745	0.53	0.338	1.18949e-304	308.303	303.925	Snx17
0	0.444303	0.321	0.129	1.18949e-304	308.303	303.925	Septin11
0	0.0478495	0.532	0.34	1.18949e-304	308.303	303.925	Snx10
0	2.09903	0.242	0.05	1.18949e-304	308.303	303.925	Cdkn2d
0	1.18314	0.276	0.084	1.18949e-304	308.303	303.925	Med9
0	0.201219	0.45	0.258	1.18949e-304	308.303	303.925	Polr2a
0	0.583192	0.349	0.157	1.18949e-304	308.303	303.925	Psmd3
0	1.05758	0.292	0.1	1.18949e-304	308.303	303.925	Tceal8
0	1.06851	0.949	0.757	1.18949e-304	308.303	303.925	Rps27a
0	0.176215	0.736	0.544	1.18949e-304	308.303	303.925	Hnrnpm
0	0.343861	0.401	0.21	1.18949e-304	308.303	303.925	Phax
0	0.0284473	0.512	0.321	1.18949e-304	308.303	303.925	Mff
0	3.66822	0.202	0.011	1.18949e-304	308.303	303.925	Lmna
0	0.757796	0.313	0.122	1.18949e-304	308.303	303.925	Hadh
0	-0.00669914	0.527	0.336	1.18949e-304	308.303	303.925	Pepd
0	0.178624	0.476	0.285	1.18949e-304	308.303	303.925	Stt3a
0	0.0690838	0.523	0.332	1.18949e-304	308.303	303.925	Psmd11
0	3.94313	0.202	0.011	1.18949e-304	308.303	303.925	Tk1
0	0.481748	0.368	0.177	1.18949e-304	308.303	303.925	Otub1
0	0.240021	0.361	0.17	1.18949e-304	308.303	303.925	Snx8
0	3.92266	0.205	0.014	1.18949e-304	308.303	303.925	Racgap1
0	0.544301	0.362	0.171	1.18949e-304	308.303	303.925	H2-M3
0	-1.71008	0.711	0.901	1.18949e-304	308.303	303.925	Ivns1abp
0	0.0517259	0.561	0.371	1.18949e-304	308.303	303.925	Sdha
0	0.154857	0.545	0.355	1.18949e-304	308.303	303.925	Ddx3x
0	0.736903	0.319	0.129	1.18949e-304	308.303	303.925	Pfdn4
0	2.16244	0.214	0.024	1.18949e-304	308.303	303.925	Napsa
0	0.700008	0.33	0.14	1.18949e-304	308.303	303.925	Pes1
0	0.0403483	0.525	0.335	1.18949e-304	308.303	303.925	Derl2
0	5.20954	0.194	0.004	1.18949e-304	308.303	303.925	H1f5
0	0.0498967	0.49	0.3	1.18949e-304	308.303	303.925	Emc2
0	0.426052	0.477	0.287	1.18949e-304	308.303	303.925	Rad21
0	0.482019	0.368	0.178	1.18949e-304	308.303	303.925	Gnptg
0	0.604609	0.324	0.134	1.18949e-304	308.303	303.925	Arl2
0	1.74974	0.234	0.044	1.18949e-304	308.303	303.925	Hmgn5
0	0.734723	0.33	0.14	1.18949e-304	308.303	303.925	Psmd10
0	-0.0103739	0.575	0.385	1.18949e-304	308.303	303.925	Epn1
0	0.371291	0.819	0.629	1.18949e-304	308.303	303.925	Canx
0	0.0247773	0.589	0.399	1.18949e-304	308.303	303.925	Atxn10
0	-1.53229	0.727	0.916	1.18949e-304	308.303	303.925	Frmd4a
0	0.563295	0.34	0.151	1.18949e-304	308.303	303.925	Slc39a1
0	0.577221	0.341	0.152	1.18949e-304	308.303	303.925	Bcl7c
0	0.452045	0.394	0.205	1.18949e-304	308.303	303.925	Slc35b2
0	2.62831	0.221	0.032	1.18949e-304	308.303	303.925	Dut
0	0.115974	0.474	0.285	1.18949e-304	308.303	303.925	Commd7
0	6.30083	0.193	0.004	1.18949e-304	308.303	303.925	Cd5l
0	1.03256	0.314	0.125	1.18949e-304	308.303	303.925	Usp1
0	0.180488	0.473	0.284	1.18949e-304	308.303	303.925	Spcs3
0	0.0641254	0.424	0.235	1.18949e-304	308.303	303.925	Cyb5r4
0	0.983762	0.299	0.11	1.18949e-304	308.303	303.925	Dohh
0	0.340022	0.378	0.189	1.18949e-304	308.303	303.925	Iah1
0	0.188931	0.415	0.226	1.18949e-304	308.303	303.925	Cmas
0	0.359751	0.419	0.23	1.18949e-304	308.303	303.925	Rbm42
0	0.413868	0.36	0.171	1.18949e-304	308.303	303.925	Mphosph10
0	0.609101	0.346	0.157	1.18949e-304	308.303	303.925	Nabp2
0	0.297251	0.422	0.233	1.18949e-304	308.303	303.925	Tmx1
0	0.526303	0.359	0.17	1.18949e-304	308.303	303.925	Eif2s3x
0	-1.32246	0.595	0.783	1.18949e-304	308.303	303.925	Ppp1r9a
0	-0.0540398	0.544	0.356	1.18949e-304	308.303	303.925	Nsf
0	0.117468	0.489	0.301	1.18949e-304	308.303	303.925	Mkrn1
0	0.324112	0.374	0.186	1.18949e-304	308.303	303.925	Tomm40
0	0.432483	0.391	0.203	1.18949e-304	308.303	303.925	Ptbp1
0	1.11674	0.258	0.07	1.18949e-304	308.303	303.925	Mfsd12
0	1.65613	0.241	0.053	1.18949e-304	308.303	303.925	Selenom
0	-2.18216	0.111	0.299	1.18949e-304	308.303	303.925	Upk1b
0	1.14786	0.347	0.159	1.18949e-304	308.303	303.925	Gpr84
0	0.340409	0.357	0.169	1.18949e-304	308.303	303.925	Parl
0	0.30092	0.358	0.17	1.18949e-304	308.303	303.925	Pum3
0	0.218615	0.745	0.557	1.18949e-304	308.303	303.925	Adgre1
0	0.93532	0.275	0.088	1.18949e-304	308.303	303.925	Gfus
0	1.24689	0.281	0.094	1.18949e-304	308.303	303.925	Rnf128
0	0.737967	0.321	0.134	1.18949e-304	308.303	303.925	Ogfr
0	0.735418	0.316	0.129	1.18949e-304	308.303	303.925	Lyar
0	2.78719	0.211	0.024	1.18949e-304	308.303	303.925	Diaph3
0	0.0740838	0.433	0.246	1.18949e-304	308.303	303.925	Uchl3
0	0.284155	0.408	0.221	1.18949e-304	308.303	303.925	Snrpa
0	0.091458	0.564	0.377	1.18949e-304	308.303	303.925	Rbbp4
0	0.703024	0.863	0.676	1.18949e-304	308.303	303.925	Ctsh
0	1.14558	0.958	0.771	1.18949e-304	308.303	303.925	Rpl23
0	-0.160052	0.576	0.389	1.18949e-304	308.303	303.925	Aopep
0	0.495516	0.801	0.615	1.18949e-304	308.303	303.925	Hnrnpa3
0	-0.910039	0.709	0.895	1.18949e-304	308.303	303.925	Nav3
0	0.472927	0.342	0.156	1.18949e-304	308.303	303.925	Erg28
0	2.12577	0.217	0.031	1.18949e-304	308.303	303.925	Capn2
0	0.00503093	0.526	0.34	1.18949e-304	308.303	303.925	Mtarc2
0	4.1237	0.195	0.009	1.18949e-304	308.303	303.925	Cd24a
0	0.149217	0.454	0.268	1.18949e-304	308.303	303.925	Slc38a10
0	0.106136	0.462	0.276	1.18949e-304	308.303	303.925	Osgep
0	0.429256	0.826	0.64	1.18949e-304	308.303	303.925	Capzb
0	0.735076	0.861	0.675	1.18949e-304	308.303	303.925	Hsp90ab1
0	-1.38697	0.696	0.881	1.18949e-304	308.303	303.925	Slco2b1
0	0.610696	0.329	0.144	1.18949e-304	308.303	303.925	Chmp1a
0	0.420454	0.392	0.207	1.18949e-304	308.303	303.925	Nagpa
0	0.486387	0.376	0.191	1.18949e-304	308.303	303.925	Nop58
0	0.390235	0.374	0.189	1.18949e-304	308.303	303.925	Commd2
0	0.32791	0.469	0.284	1.18949e-304	308.303	303.925	Tent5c
0	-0.0381892	0.453	0.268	1.18949e-304	308.303	303.925	Luzp1
0	0.261205	0.429	0.244	1.18949e-304	308.303	303.925	Calu
0	-2.09014	0.124	0.309	1.18949e-304	308.303	303.925	Tmc7
0	0.584036	0.311	0.126	1.18949e-304	308.303	303.925	Tmem192
0	0.117044	0.487	0.302	1.18949e-304	308.303	303.925	Lactb
0	4.7167	0.191	0.006	1.18949e-304	308.303	303.925	Cenpw
0	0.205924	0.425	0.24	1.18949e-304	308.303	303.925	Mettl23
0	6.02551	0.187	0.002	1.18949e-304	308.303	303.925	Pbk
0	1.20044	0.257	0.072	1.18949e-304	308.303	303.925	Slc39a14
0	5.39034	0.19	0.005	1.18949e-304	308.303	303.925	Igfbp6
0	6.52093	0.187	0.002	1.18949e-304	308.303	303.925	Ch25h
0	0.317431	0.367	0.182	1.18949e-304	308.303	303.925	Sms
0	0.633057	0.351	0.166	1.18949e-304	308.303	303.925	Nupr1
0	0.389571	0.544	0.36	1.18949e-304	308.303	303.925	Gatm
0	0.272417	0.768	0.584	1.18949e-304	308.303	303.925	Ckb
0	0.0751085	0.468	0.284	1.18949e-304	308.303	303.925	Akt1
0	0.790423	0.27	0.086	1.18949e-304	308.303	303.925	Gga2
0	1.17393	0.276	0.092	1.18949e-304	308.303	303.925	Tufm
0	0.109258	0.396	0.212	1.18949e-304	308.303	303.925	Marchf2
0	1.99958	0.221	0.037	1.18949e-304	308.303	303.925	Cd244a
0	0.181359	0.423	0.239	1.18949e-304	308.303	303.925	Dnttip2
0	1.27888	0.262	0.078	1.18949e-304	308.303	303.925	Tmem254
0	1.24315	0.255	0.071	1.18949e-304	308.303	303.925	2310039H08Rik
0	0.21668	0.418	0.234	1.18949e-304	308.303	303.925	Mtfr1l
0	0.224408	0.415	0.231	1.18949e-304	308.303	303.925	Acsl5
0	0.531537	0.353	0.169	1.18949e-304	308.303	303.925	Prdx3
0	0.977752	0.952	0.768	1.18949e-304	308.303	303.925	Rpl37a
0	0.863051	0.944	0.76	1.18949e-304	308.303	303.925	Rpl39
0	1.15025	0.27	0.087	1.18949e-304	308.303	303.925	Slc25a1
0	0.122122	0.388	0.205	1.18949e-304	308.303	303.925	Mospd2
0	2.41082	0.195	0.012	1.18949e-304	308.303	303.925	Csrp1
0	0.502894	0.36	0.177	1.18949e-304	308.303	303.925	Hat1
0	0.674131	0.355	0.172	1.18949e-304	308.303	303.925	Rapsn
0	2.36505	0.221	0.038	1.18949e-304	308.303	303.925	Rilpl2
0	0.10199	0.448	0.265	1.18949e-304	308.303	303.925	Wbp2
0	-1.51411	0.236	0.419	1.18949e-304	308.303	303.925	Gm35188
0	1.02468	0.319	0.136	1.18949e-304	308.303	303.925	Rad51b
0	0.664404	0.462	0.279	1.18949e-304	308.303	303.925	H2bc4
0	0.400101	0.373	0.19	1.18949e-304	308.303	303.925	Emd
0	0.437266	0.351	0.168	1.18949e-304	308.303	303.925	Mpdu1
0	0.386108	0.413	0.23	1.18949e-304	308.303	303.925	Ubald2
0	0.150969	0.409	0.226	1.18949e-304	308.303	303.925	BC004004
0	-1.29362	0.497	0.679	1.18949e-304	308.303	303.925	Capn3
0	0.657203	0.329	0.147	1.18949e-304	308.303	303.925	Bola1
0	0.854568	0.281	0.099	1.18949e-304	308.303	303.925	Tfdp1
0	0.149572	0.399	0.217	1.18949e-304	308.303	303.925	Zmat5
0	3.93554	0.192	0.01	1.18949e-304	308.303	303.925	Knstrn
0	1.69195	0.228	0.046	1.18949e-304	308.303	303.925	Sulf2
0	0.392101	0.384	0.202	1.18949e-304	308.303	303.925	Lrrc25
0	2.42091	0.204	0.022	1.18949e-304	308.303	303.925	Cpne2
0	0.702388	0.309	0.127	1.18949e-304	308.303	303.925	Mif4gd
0	0.601422	0.321	0.139	1.18949e-304	308.303	303.925	Smn1
0	0.517408	0.457	0.275	1.18949e-304	308.303	303.925	H2-DMb1
0	0.546275	0.35	0.168	1.18949e-304	308.303	303.925	Gps1
0	0.869722	0.945	0.763	1.18949e-304	308.303	303.925	Rpl37
0	-0.0463491	0.539	0.358	1.18949e-304	308.303	303.925	Dcun1d5
0	0.0800693	0.466	0.285	1.18949e-304	308.303	303.925	Xpo1
0	0.455926	0.325	0.144	1.18949e-304	308.303	303.925	Psmd9
0	0.450916	0.332	0.151	1.18949e-304	308.303	303.925	Pnkp
0	0.0732093	0.471	0.29	1.18949e-304	308.303	303.925	Ddx18
0	0.0815546	0.47	0.289	1.18949e-304	308.303	303.925	Gnai3
0	3.6541	0.197	0.016	1.18949e-304	308.303	303.925	Mcm5
0	0.566761	0.364	0.183	1.18949e-304	308.303	303.925	Hivep2
0	0.0861244	0.456	0.275	1.18949e-304	308.303	303.925	Sdf2
0	0.520228	0.318	0.137	1.18949e-304	308.303	303.925	Utp18
0	0.159753	0.481	0.3	1.18949e-304	308.303	303.925	Kpnb1
0	0.608554	0.309	0.128	1.18949e-304	308.303	303.925	Eef1akmt1
0	-8.27936e-05	0.444	0.263	1.18949e-304	308.303	303.925	Snx4
0	0.0418564	0.474	0.293	1.18949e-304	308.303	303.925	Ifnar1
0	0.151887	0.413	0.232	1.18949e-304	308.303	303.925	Ankrd40
0	0.555962	0.346	0.165	1.18949e-304	308.303	303.925	Cltb
0	0.525173	0.323	0.143	1.18949e-304	308.303	303.925	Larp7
0	0.592824	0.322	0.142	1.18949e-304	308.303	303.925	Mrpl22
0	0.866915	0.281	0.101	1.18949e-304	308.303	303.925	Ftsj3
0	0.822342	0.279	0.099	1.18949e-304	308.303	303.925	Tmem242
0	0.277735	0.387	0.207	1.18949e-304	308.303	303.925	Tcof1
0	0.37294	0.364	0.184	1.18949e-304	308.303	303.925	Dpm2
0	5.23893	0.184	0.004	1.18949e-304	308.303	303.925	Nusap1
0	0.657758	0.309	0.129	1.18949e-304	308.303	303.925	Polr3k
0	0.986159	0.299	0.119	1.18949e-304	308.303	303.925	Srm
0	3.72648	0.189	0.009	1.18949e-304	308.303	303.925	Bst1
0	0.156421	0.431	0.251	1.18949e-304	308.303	303.925	Fcf1
0	0.592267	0.313	0.133	1.18949e-304	308.303	303.925	Nup50
[truncated: 6,997 more rows]
