# Supplementary material for: Inhibition of autophagy-lysosomal function exacerbates microglial and monocyte lipid metabolism reprograming and dysfunction after brain injury
Source: bioRxiv preprint, doi:10.1101/2025.09.04.674092, version 1 (2025-09-08)
Supplement: Table_S5 [file 674092_file04.xlsx]

## Sheet: DE_DAM3_vs_all_microglia_TBI
Table S5. Differentially expressed genes in DAM3 vs all other microglial populations and in BAM_7 vs all other BAM populations in the TBI brain.
gene	p_val	p_val_adj	log10_p_val	log10_p_val_adj	avg_log2FC	pct.1	pct.2
Lpl	0	0	300	300	2.14548	0.895	0.4
Lilrb4a	0	0	300	300	1.37386	0.866	0.408
Cd72	0	0	300	300	1.45869	0.805	0.35
Igf1	0	0	300	300	2.17368	0.686	0.238
Rhoc	0	0	300	300	1.50837	0.736	0.291
Myo1e	0	0	300	300	1.21358	0.899	0.454
Ch25h	0	0	300	300	2.30664	0.632	0.187
Ccl3	0	0	300	300	2.35979	0.712	0.288
Capg	0	0	300	300	1.14613	0.893	0.477
Nceh1	0	0	300	300	0.932534	0.753	0.341
Gpr65	0	0	300	300	1.14919	0.749	0.339
Dab2	0	0	300	300	1.34048	0.883	0.48
Uap1l1	0	0	300	300	0.834091	0.822	0.419
Cxcl16	0	0	300	300	0.918528	0.896	0.494
Anxa5	0	0	300	300	0.889491	0.916	0.517
Aplp2	0	0	300	300	0.85793	0.861	0.465
Ccl4	0	0	300	300	2.72995	0.659	0.265
Ell2	0	0	300	300	1.11773	0.695	0.302
Msr1	0	0	300	300	1.3944	0.743	0.352
Cpd	0	0	300	300	0.78351	0.921	0.531
Ctla2b	0	0	300	300	1.01942	0.777	0.388
Rap2b	0	0	300	300	0.945096	0.735	0.349
Clec7a	0	0	300	300	1.58196	0.713	0.327
Eno1	0	0	300	300	0.81422	0.901	0.516
Cndp2	0	0	300	300	0.866018	0.922	0.537
Rab7b	0	0	300	300	1.39607	0.617	0.234
Ctla2a	0	0	300	300	2.02504	0.554	0.171
Pgk1	0	0	300	300	0.881904	0.927	0.55
Gla	0	0	300	300	1.10774	0.65	0.273
Id2	0	0	300	300	1.35496	0.671	0.299
Mydgf	0	0	300	300	0.795546	0.93	0.559
Tpi1	0	0	300	300	0.879566	0.927	0.559
Mt2	0	0	300	300	1.79533	0.576	0.209
C3ar1	0	0	300	300	0.913417	0.94	0.574
Emp3	0	0	300	300	0.888609	0.945	0.582
Lrpap1	0	0	300	300	0.7906	0.938	0.577
Sdf2l1	0	0	300	300	0.839661	0.957	0.596
Bcar3	0	0	300	300	1.3965	0.54	0.18
Gas6	0	0	300	300	0.884965	0.899	0.547
Nme1	0	0	300	300	0.779021	0.952	0.6
Psmb6	0	0	300	300	0.874984	0.949	0.605
Csf1	0	0	300	300	1.70459	0.558	0.215
Ldha	0	0	300	300	0.915727	0.954	0.611
Pgam1	0	0	300	300	0.848832	0.952	0.611
Lilrb4b	0	0	300	300	1.22654	0.577	0.238
Bcl2a1b	0	0	300	300	0.925874	0.963	0.626
Plin2	0	0	300	300	1.23183	0.916	0.582
Adam8	0	0	300	300	1.31727	0.566	0.237
Sdc4	0	0	300	300	1.37914	0.547	0.219
Etl4	0	0	300	300	2.06159	0.374	0.088
Bcl2a1d	0	0	300	300	1.51314	0.406	0.129
Aldoa	0	0	300	300	0.825601	0.983	0.707
Pkm	0	0	300	300	0.977565	0.98	0.705
Mif	0	0	300	300	0.836924	0.981	0.71
Cstb	0	0	300	300	0.72754	0.983	0.716
Mt1	0	0	300	300	1.28999	0.988	0.733
Nme2	0	0	300	300	0.629993	0.998	0.785
Cd68	0	0	300	300	0.740458	0.995	0.783
Hspa5	0	0	300	300	0.903274	0.997	0.792
Myl6	0	0	300	300	0.62551	0.995	0.799
Atp6v0c	0	0	300	300	0.697929	0.997	0.803
Hsp90ab1	0	0	300	300	0.639382	0.998	0.805
Calr	0	0	300	300	0.787651	0.998	0.809
Gapdh	0	0	300	300	0.883186	0.999	0.818
Cfl1	0	0	300	300	0.639595	0.997	0.822
Gng5	0	0	300	300	0.659674	0.997	0.827
Cd63	0	0	300	300	0.966442	0.998	0.842
Rps2	0	0	300	300	0.613181	0.999	0.86
Ctsl	0	0	300	300	0.748245	1	0.876
Ctsz	0	0	300	300	0.667776	1	0.905
Fcer1g	0	0	300	300	0.52074	1	0.931
Ctsb	0	0	300	300	0.774598	1	0.964
Actb	0	0	300	300	0.708513	1	0.973
Ftl1	0	0	300	300	1.03767	1	0.989
Ctsd	0	0	300	300	0.737929	1	0.993
Fth1	0	0	300	300	0.829645	1	0.996
Tmsb4x	0	0	300	300	0.599863	1	1
Eif1a	6.66933e-308	1.59477e-303	300	299.999	0.824551	0.809	0.414
Cacna1a	1.48414e-307	3.54889e-303	300	299.998	0.748346	0.678	0.31
Selenom	1.02194e-306	2.44367e-302	300	299.99	1.17665	0.532	0.209
Serf2	1.65089e-306	3.9476e-302	300	299.983	0.546921	1	0.858
Calm1	3.12878e-306	7.48153e-302	300	299.969	0.678795	0.995	0.787
Tlr2	1.99932e-305	4.78077e-301	300	299.83	0.994793	0.79	0.404
Hsp90b1	2.45738e-305	5.87608e-301	300	299.799	0.638765	0.997	0.839
Rai14	9.93525e-304	2.37572e-299	300	298.606	0.912919	0.621	0.265
Bola2	2.44582e-303	5.84845e-299	299.999	298.226	0.717544	0.964	0.615
Tmem256	5.96382e-303	1.42607e-298	299.997	297.843	0.703537	0.97	0.645
Fmn1	1.17966e-302	2.82081e-298	299.995	297.548	0.771862	0.755	0.377
Eif4a1	3.34816e-302	8.00613e-298	299.986	297.096	0.688604	0.987	0.705
Pfn1	5.04992e-300	1.20754e-295	299.218	294.918	0.623064	0.997	0.808
Aprt	2.20238e-299	5.26633e-295	298.638	294.278	0.789872	0.913	0.542
Cd5l	2.60999e-299	6.241e-295	298.567	294.205	1.84575	0.489	0.188
Milr1	4.86399e-298	1.16308e-293	297.312	292.934	0.811505	0.806	0.413
Ftl1-ps1	1.41305e-297	3.37888e-293	296.85	292.471	0.843633	0.863	0.481
Speg	1.99312e-296	4.76595e-292	295.7	291.322	0.903089	0.506	0.191
Uqcrq	1.59161e-293	3.80585e-289	292.798	288.42	0.649321	0.987	0.716
Nrp2	1.46907e-292	3.51283e-288	291.833	287.454	0.714085	0.83	0.441
Atp5g1	1.48107e-289	3.54154e-285	288.829	284.451	0.677043	0.978	0.675
Lgals1	4.31014e-288	1.03064e-283	287.366	282.987	0.971923	0.926	0.638
Ppp1r14b	5.17403e-288	1.23721e-283	287.286	282.908	0.71771	0.966	0.653
Txndc17	6.59241e-288	1.57638e-283	287.181	282.802	0.697473	0.943	0.59
Tceal9	1.53258e-287	3.6647e-283	286.815	282.436	0.785574	0.848	0.46
Atf3	1.91677e-287	4.58338e-283	286.717	282.339	1.63456	0.461	0.176
Selenow	3.84966e-286	9.2053e-282	285.415	281.036	0.743617	0.938	0.588
Siglech	8.7788e-286	2.09919e-281	285.057	280.678	-1.4972	0.787	0.849
Rpl41	6.6093e-284	1.58042e-279	283.18	278.801	0.481017	1	0.939
Tent5c	1.35796e-283	3.24715e-279	282.867	278.488	0.769951	0.831	0.455
Ncbp2as2	3.65448e-283	8.73858e-279	282.437	278.059	0.695486	0.909	0.537
Dusp3	1.74222e-282	4.16599e-278	281.759	277.38	0.726601	0.76	0.378
Clic4	3.55286e-281	8.4956e-277	280.449	276.071	1.00601	0.573	0.246
Vps29	4.66199e-281	1.11477e-276	280.331	275.953	0.687021	0.94	0.586
Pdia3	1.19911e-280	2.8673e-276	279.921	275.543	0.583214	0.997	0.798
Zfhx3	7.07443e-280	1.69164e-275	279.15	274.772	-1.60472	0.956	0.899
Vim	2.70235e-279	6.46187e-275	278.568	274.19	0.919974	0.814	0.446
Pdia6	8.51972e-279	2.03724e-274	278.07	273.691	0.676582	0.981	0.713
Ndufa4	2.13952e-277	5.11601e-273	276.67	272.291	0.625152	0.986	0.723
Glipr1	5.33016e-277	1.27455e-272	276.273	271.895	0.911018	0.644	0.297
C5ar1	2.59151e-276	6.19681e-272	275.586	271.208	0.690167	0.78	0.397
Hif1a	2.04313e-275	4.88552e-271	274.69	270.311	0.735772	0.952	0.617
Psen2	4.51896e-275	1.08057e-270	274.345	269.966	0.906382	0.59	0.261
Tspan4	5.82386e-273	1.3926e-268	272.235	267.856	0.719255	0.836	0.45
Sash1	3.41964e-271	8.17705e-267	270.466	266.087	0.955225	0.626	0.287
Eif5a	1.18012e-270	2.82191e-266	269.928	265.549	0.694905	0.97	0.651
Bola3	3.97703e-270	9.50988e-266	269.4	265.022	0.760369	0.74	0.365
Serpinb6a	1.0097e-269	2.4144e-265	268.996	264.617	0.795884	0.688	0.336
Ppia	1.72255e-269	4.11897e-265	268.764	264.385	0.531566	0.999	0.87
Anxa2	2.41087e-269	5.76486e-265	268.618	264.239	0.762234	0.743	0.371
S1pr1	4.25774e-269	1.01811e-264	268.371	263.992	0.914013	0.575	0.251
Cdk18	1.41902e-268	3.39317e-264	267.848	263.469	1.84286	0.242	0.059
Glrx	1.89381e-268	4.52849e-264	267.723	263.344	0.931828	0.632	0.297
Atp6v1a	1.00166e-267	2.39516e-263	266.999	262.621	0.679604	0.875	0.487
Cspg4	4.42897e-267	1.05905e-262	266.354	261.975	2.10478	0.214	0.046
Prdx1	1.2812e-266	3.06361e-262	265.892	261.514	0.659936	0.99	0.774
Slc15a3	4.20472e-266	1.00543e-261	265.376	260.998	0.77636	0.889	0.524
Tmem160	1.59767e-265	3.82035e-261	264.797	260.418	0.685414	0.943	0.591
Pmp22	7.74182e-265	1.85122e-260	264.111	259.733	0.688554	0.932	0.578
Sec61b	3.99555e-264	9.55417e-260	263.398	259.02	0.622706	0.985	0.714
Gm1673	5.61396e-263	1.34241e-258	262.251	257.872	0.917498	0.653	0.309
Elmo1	1.50149e-262	3.59035e-258	261.823	257.445	-1.58141	0.97	0.921
Ssr2	8.32394e-262	1.99042e-257	261.08	256.701	0.73328	0.888	0.517
Ndufb8	1.10535e-260	2.64311e-256	259.957	255.578	0.648355	0.961	0.651
Ndufa12	7.24385e-260	1.73215e-255	259.14	254.761	0.649569	0.92	0.553
Ucp2	1.30586e-259	3.12258e-255	258.884	254.505	0.651271	0.984	0.725
Cyba	2.61978e-259	6.26441e-255	258.582	254.203	0.507975	0.999	0.857
Fabp3	3.02231e-259	7.22696e-255	258.52	254.141	1.17763	0.444	0.17
Actg1	1.05457e-258	2.52169e-254	257.977	253.598	0.596012	0.996	0.793
Psmd8	2.58162e-258	6.17316e-254	257.588	253.209	0.707481	0.918	0.555
Timp2	8.55954e-258	2.04676e-253	257.068	252.689	0.672354	0.995	0.776
Fblim1	1.01825e-257	2.43485e-253	256.992	252.614	0.756728	0.603	0.27
Ndufc1	1.96798e-257	4.70582e-253	256.706	252.327	0.635064	0.964	0.643
Ndufv3	9.07599e-257	2.17025e-252	256.042	251.663	0.60467	0.967	0.638
Arpc3	5.36428e-256	1.28271e-251	255.27	250.892	0.623734	0.99	0.777
Chst2	1.43768e-255	3.43778e-251	254.842	250.464	1.60325	0.322	0.101
Dad1	9.89494e-255	2.36608e-250	254.005	249.626	0.602517	0.982	0.68
Romo1	5.49096e-254	1.313e-249	253.26	248.882	0.605455	0.963	0.631
Prelid1	2.43277e-253	5.81725e-249	252.614	248.235	0.676575	0.929	0.564
Ubl4a	3.27738e-253	7.83686e-249	252.484	248.106	0.77497	0.715	0.358
Sars	3.37263e-253	8.06462e-249	252.472	248.093	0.656726	0.837	0.46
Mrpl20	3.46964e-253	8.2966e-249	252.46	248.081	0.651794	0.916	0.549
Ccnd1	3.87365e-253	9.26266e-249	252.412	248.033	0.807885	0.717	0.368
Ndufb6	4.90704e-253	1.17337e-248	252.309	247.931	0.659648	0.869	0.491
Mien1	5.30057e-252	1.26747e-247	251.276	246.897	0.672605	0.822	0.444
Mrpl54	1.73412e-251	4.14662e-247	250.761	246.382	0.652582	0.844	0.465
Gusb	3.07001e-251	7.341e-247	250.513	246.134	0.596273	0.975	0.682
Gnptab	3.63469e-251	8.69127e-247	250.44	246.061	0.613168	0.676	0.328
Rexo2	5.40225e-251	1.29178e-246	250.267	245.889	0.675015	0.87	0.499
Plek	6.31626e-251	1.51034e-246	250.2	245.821	0.617968	0.996	0.8
Npl	3.20723e-250	7.66912e-246	249.494	245.115	0.725949	0.886	0.538
Hspd1	7.86279e-250	1.88015e-245	249.104	244.726	0.684541	0.92	0.558
Commd4	2.09221e-249	5.0029e-245	248.679	244.301	0.617003	0.849	0.461
Tanc2	2.54858e-249	6.09417e-245	248.594	244.215	-1.78876	0.947	0.881
Prdx2	3.31103e-249	7.91734e-245	248.48	244.101	0.622423	0.94	0.582
Pkib	4.35202e-249	1.04066e-244	248.361	243.983	0.668008	0.769	0.405
Cox4i1	8.02753e-249	1.91954e-244	248.095	243.717	0.490598	0.998	0.832
Glmp	3.79216e-248	9.0678e-244	247.421	243.042	0.646146	0.927	0.561
Rpn1	3.98547e-248	9.53006e-244	247.4	243.021	0.690287	0.925	0.566
Cotl1	4.028e-248	9.63175e-244	247.395	243.016	0.536912	0.995	0.785
Swi5	2.31852e-247	5.54404e-243	246.635	242.256	0.611025	0.952	0.621
Tspo	1.40044e-246	3.34873e-242	245.854	241.475	0.644592	0.975	0.695
Hsd17b12	2.84486e-246	6.80263e-242	245.546	241.167	0.60009	0.849	0.475
P4hb	6.5315e-246	1.56181e-241	245.185	240.806	0.653245	0.945	0.61
Psat1	1.11284e-245	2.66101e-241	244.954	240.575	0.687744	0.781	0.405
Galk1	2.15642e-245	5.15642e-241	244.666	240.288	0.917712	0.568	0.255
Mpp1	4.04575e-245	9.67419e-241	244.393	240.014	0.687057	0.789	0.424
Vat1	9.04036e-245	2.16173e-240	244.044	239.665	0.849903	0.561	0.243
Gabarap	1.01221e-244	2.42039e-240	243.995	239.616	0.523833	0.995	0.787
Tex264	2.0716e-244	4.9536e-240	243.684	239.305	0.718163	0.626	0.291
Tpm4	2.43605e-244	5.82508e-240	243.613	239.235	0.660264	0.859	0.477
Ndufb2	4.82904e-244	1.15472e-239	243.316	238.938	0.612797	0.921	0.566
Gde1	8.38857e-244	2.00588e-239	243.076	238.698	0.669553	0.845	0.477
Enpp1	1.32372e-243	3.16528e-239	242.878	238.5	0.863571	0.559	0.249
Mdfic	1.39439e-243	3.33427e-239	242.856	238.477	0.723167	0.642	0.301
Uqcc2	1.91879e-243	4.5882e-239	242.717	238.338	0.60578	0.943	0.598
Elob	5.39e-243	1.28886e-238	242.268	237.89	0.558716	0.988	0.735
Creld2	5.65331e-243	1.35182e-238	242.248	237.869	0.788126	0.718	0.364
Atp1a1	7.61439e-243	1.82075e-238	242.118	237.74	0.637189	0.903	0.535
Nt5c	1.86733e-242	4.46516e-238	241.729	237.35	0.678203	0.752	0.388
Ube2m	2.21492e-242	5.29631e-238	241.655	237.276	0.636378	0.892	0.522
Uqcr11	1.09389e-241	2.61571e-237	240.961	236.582	0.561925	0.983	0.708
S100a1	6.29599e-241	1.5055e-236	240.201	235.822	0.703056	0.695	0.346
Twf1	9.89671e-241	2.3665e-236	240.005	235.626	0.674604	0.758	0.404
Lipa	3.8882e-240	9.29746e-236	239.41	235.032	0.637491	0.9	0.531
Manf	4.19992e-240	1.00428e-235	239.377	234.998	0.696946	0.966	0.668
Spcs2	1.21066e-239	2.89493e-235	238.917	234.538	0.607709	0.981	0.696
Tomm5	1.49135e-239	3.56612e-235	238.826	234.448	0.617268	0.837	0.461
Ostc	3.46712e-239	8.29058e-235	238.46	234.081	0.636604	0.908	0.55
Tmem126a	9.21562e-239	2.20364e-234	238.035	233.657	0.661515	0.804	0.443
Chchd2	2.16604e-238	5.17944e-234	237.664	233.286	0.529911	0.992	0.771
Ndufs5	3.02903e-238	7.24301e-234	237.519	233.14	0.585076	0.959	0.635
Pebp1	6.41234e-238	1.53332e-233	237.193	232.814	0.61327	0.948	0.603
Eprs	8.88422e-238	2.12439e-233	237.051	232.673	0.608778	0.87	0.496
Cox6a1	9.46317e-238	2.26283e-233	237.024	232.645	0.580727	0.971	0.664
Apbb2	9.97501e-238	2.38522e-233	237.001	232.622	0.48586	0.86	0.489
Tceal8	1.00062e-237	2.39269e-233	237	232.621	0.847288	0.563	0.254
Cela1	2.82955e-237	6.76602e-233	236.548	232.17	0.936958	0.607	0.289
Rpsa	3.25293e-237	7.77841e-233	236.488	232.109	0.486256	1	0.883
Timm13	4.26472e-237	1.01978e-232	236.37	231.991	0.617819	0.95	0.611
Gpx1	5.86512e-237	1.40247e-232	236.232	231.853	0.591812	0.99	0.741
Fam20c	1.21514e-236	2.90564e-232	235.915	231.537	1.33337	0.424	0.167
Mrpl12	2.79517e-236	6.68382e-232	235.554	231.175	0.612837	0.821	0.444
Cox6b1	7.49289e-236	1.7917e-231	235.125	230.747	0.518291	0.991	0.757
Ap2s1	9.56519e-236	2.28723e-231	235.019	230.641	0.632614	0.926	0.582
Sqstm1	3.67544e-235	8.78871e-231	234.435	230.056	0.691931	0.803	0.435
Ndufa2	3.96312e-235	9.47661e-231	234.402	230.023	0.536904	0.983	0.714
Sec61g	5.71138e-234	1.3657e-229	233.243	228.865	0.549881	0.99	0.74
Rex1bd	8.76829e-234	2.09667e-229	233.057	228.678	0.623386	0.889	0.525
Uqcr10	2.60246e-233	6.22299e-229	232.585	228.206	0.576428	0.97	0.668
Tmem254	2.98606e-233	7.14028e-229	232.525	228.146	0.893955	0.553	0.25
Tmem9b	5.33261e-233	1.27513e-228	232.273	227.894	0.62434	0.777	0.414
Tmed10	7.90598e-233	1.89048e-228	232.102	227.723	0.582825	0.976	0.699
Fkbp2	1.93237e-232	4.62068e-228	231.714	227.335	0.586553	0.97	0.673
Dbi	5.21867e-232	1.24789e-227	231.282	226.904	0.62247	0.955	0.635
Lgals3	7.72442e-232	1.84706e-227	231.112	226.734	0.816629	0.899	0.598
Atp6v1g1	2.27219e-231	5.43325e-227	230.644	226.265	0.545651	0.99	0.726
H2bc4	1.11181e-230	2.65857e-226	229.954	225.575	0.744716	0.795	0.45
Fundc2	2.51323e-230	6.00964e-226	229.6	225.221	0.607081	0.857	0.475
Aurkaip1	2.95438e-230	7.06452e-226	229.53	225.151	0.600517	0.862	0.49
Mrps36	2.77077e-229	6.62547e-225	228.557	224.179	0.568389	0.823	0.453
Mrpl34	6.31972e-229	1.51117e-224	228.199	223.821	0.57101	0.861	0.486
Cops9	5.4017e-228	1.29165e-223	227.267	222.889	0.545877	0.977	0.677
Echs1	5.63629e-228	1.34775e-223	227.249	222.87	0.618874	0.81	0.441
Pdia4	6.13429e-228	1.46683e-223	227.212	222.834	0.651686	0.883	0.516
Atp6v1f	7.68081e-228	1.83664e-223	227.115	222.736	0.537177	0.986	0.706
Slc25a4	1.01011e-227	2.41538e-223	226.996	222.617	0.603021	0.934	0.577
Gmppb	1.6673e-227	3.98684e-223	226.778	222.399	1.05301	0.442	0.181
Surf4	2.48148e-227	5.93372e-223	226.605	222.227	0.594092	0.853	0.477
Bax	2.52408e-227	6.03559e-223	226.598	222.219	0.58195	0.943	0.594
Atp5k	5.71368e-227	1.36625e-222	226.243	221.864	0.563809	0.976	0.679
P2ry12	7.12353e-227	1.70338e-222	226.147	221.769	-1.09709	0.966	0.898
Bex3	7.51653e-227	1.79735e-222	226.124	221.745	0.805211	0.611	0.294
Soat1	8.15436e-227	1.94987e-222	226.089	221.71	0.650805	0.9	0.542
Get3	2.00725e-226	4.79974e-222	225.697	221.319	0.679332	0.673	0.337
Sra1	2.06295e-226	4.93293e-222	225.686	221.307	0.637729	0.76	0.408
Atp6v0e	2.62189e-226	6.26947e-222	225.581	221.203	0.553661	0.98	0.701
Stmp1	2.85513e-226	6.82718e-222	225.544	221.166	0.553173	0.848	0.482
Rps8	7.52484e-226	1.79934e-221	225.124	220.745	0.448701	1	0.926
Sh3bgrl3	9.87389e-226	2.36104e-221	225.006	220.627	0.470785	0.998	0.837
Dock4	1.43686e-225	3.43581e-221	224.843	220.464	-1.5004	0.961	0.9
Syngr1	3.96784e-225	9.48789e-221	224.401	220.023	0.538815	0.995	0.826
Neu1	5.059e-225	1.20971e-220	224.296	219.917	0.596069	0.703	0.357
Nucb2	5.88049e-225	1.40614e-220	224.231	219.852	0.63898	0.699	0.357
Ank	1.19801e-224	2.86467e-220	223.922	219.543	0.958304	0.664	0.337
Cst7	4.31442e-224	1.03166e-219	223.365	218.986	0.844669	0.733	0.392
Psmd12	6.34882e-224	1.51813e-219	223.197	218.819	0.607114	0.867	0.5
Ndufa5	1.57305e-223	3.76148e-219	222.803	218.425	0.577952	0.911	0.554
Atp5g3	2.35427e-223	5.62953e-219	222.628	218.25	0.57776	0.936	0.579
Sh3bgrl	2.89924e-223	6.93266e-219	222.538	218.159	0.585434	0.768	0.4
Srm	3.57669e-223	8.55258e-219	222.447	218.068	0.857491	0.584	0.278
Dock10	7.12179e-223	1.70296e-218	222.147	217.769	-1.41388	0.915	0.857
Psmb5	1.35507e-221	3.24025e-217	220.868	216.489	0.609209	0.919	0.567
Tagln2	1.76135e-221	4.21174e-217	220.754	216.376	0.626441	0.853	0.483
Pld3	1.95959e-221	4.68578e-217	220.708	216.329	0.559574	0.9	0.533
Tnfsf12	3.18411e-221	7.61383e-217	220.497	216.118	0.653904	0.708	0.361
Tle5	4.52697e-221	1.08249e-216	220.344	215.966	0.614652	0.928	0.567
Naa38	6.39769e-221	1.52982e-216	220.194	215.815	0.563302	0.863	0.493
Cd9	7.78285e-221	1.86104e-216	220.109	215.73	0.620739	0.997	0.847
Smdt1	4.35159e-220	1.04055e-215	219.361	214.983	0.553682	0.971	0.67
Pdgfa	8.28886e-220	1.98203e-215	219.082	214.703	0.981789	0.513	0.23
Lrrc59	9.30486e-220	2.22498e-215	219.031	214.653	0.622802	0.713	0.373
Por	1.26999e-219	3.03681e-215	218.896	214.518	0.639498	0.693	0.355
Cox5b	2.17142e-219	5.19231e-215	218.663	214.285	0.567899	0.967	0.662
Ndufb7	2.88931e-219	6.90892e-215	218.539	214.161	0.543338	0.964	0.652
Slc35b1	4.34421e-219	1.03879e-214	218.362	213.983	0.611675	0.759	0.404
C1qbp	4.46307e-219	1.06721e-214	218.35	213.972	0.617626	0.841	0.474
Mrpl19	1.92798e-218	4.61018e-214	217.715	213.336	0.828627	0.557	0.262
Capns1	2.372e-218	5.67194e-214	217.625	213.246	0.58964	0.925	0.564
Fdx2	1.63545e-217	3.91069e-213	216.786	212.408	0.699653	0.65	0.325
Cox7b	2.24283e-217	5.36306e-213	216.649	212.271	0.524986	0.98	0.705
Llph	3.53867e-217	8.46166e-213	216.451	212.073	0.545934	0.906	0.541
Tmed3	4.42437e-217	1.05796e-212	216.354	211.976	0.58905	0.934	0.576
Edf1	9.25186e-217	2.2123e-212	216.034	211.655	0.560491	0.969	0.645
Grpel1	1.25371e-216	2.99788e-212	215.902	211.523	0.60325	0.787	0.428
Acadl	1.30294e-216	3.1156e-212	215.885	211.506	0.586897	0.826	0.466
Lsm4	2.12709e-216	5.08629e-212	215.672	211.294	0.603767	0.893	0.52
Eif1ax	2.40111e-216	5.74154e-212	215.62	211.241	0.569502	0.784	0.421
Atox1	3.22462e-216	7.71071e-212	215.492	211.113	0.498457	0.993	0.765
Higd1a	3.90596e-216	9.33994e-212	215.408	211.03	0.625808	0.848	0.487
Spcs1	4.73167e-216	1.13144e-211	215.325	210.946	0.560799	0.946	0.601
Rpl19	9.28545e-216	2.22034e-211	215.032	210.654	0.434838	1	0.909
Gyg	1.58055e-215	3.77942e-211	214.801	210.423	0.741702	0.651	0.327
Ttyh2	2.34122e-215	5.59833e-211	214.631	210.252	0.993935	0.355	0.13
Arpc2	2.81202e-215	6.7241e-211	214.551	210.172	0.466274	0.997	0.814
Serf1	3.06226e-215	7.32248e-211	214.514	210.135	0.758777	0.554	0.255
Rps27l	3.15647e-215	7.54775e-211	214.501	210.122	0.555665	0.98	0.703
Slc16a3	4.02881e-215	9.63368e-211	214.395	210.016	0.767735	0.57	0.27
Dnajb11	6.28597e-215	1.5031e-210	214.202	209.823	0.557544	0.921	0.569
Gadd45gip1	6.65384e-215	1.59107e-210	214.177	209.798	0.60665	0.753	0.399
Rnf128	7.66199e-215	1.83214e-210	214.116	209.737	0.751221	0.531	0.241
Ybx1	1.76033e-214	4.2093e-210	213.754	209.376	0.552065	0.99	0.748
Ndufs6	1.79747e-214	4.2981e-210	213.745	209.367	0.559158	0.93	0.588
Eid1	1.84874e-214	4.42071e-210	213.733	209.355	0.565408	0.847	0.479
Atp5j2	3.01351e-214	7.20591e-210	213.521	209.142	0.51638	0.99	0.747
Tgfbr1	5.72292e-214	1.36846e-209	213.242	208.864	-1.33488	0.966	0.919
Timm8b	1.41106e-213	3.37413e-209	212.85	208.472	0.53653	0.868	0.502
Med29	1.87404e-213	4.4812e-209	212.727	208.349	0.667251	0.638	0.319
Rftn1	4.16421e-213	9.95746e-209	212.38	208.002	0.431309	0.724	0.372
Akr1a1	1.40754e-212	3.36571e-208	211.852	207.473	0.540798	0.985	0.721
Atp5j	1.83787e-212	4.39471e-208	211.736	207.357	0.511265	0.986	0.725
Ppib	3.52235e-212	8.42265e-208	211.453	207.075	0.513866	0.993	0.752
Chst1	7.53869e-212	1.80265e-207	211.123	206.744	0.682832	0.59	0.282
Rpl38	9.03576e-212	2.16063e-207	211.044	206.665	0.397872	0.999	0.9
Ndufa11	1.2151e-211	2.90554e-207	210.915	206.537	0.57206	0.912	0.565
Nhp2	1.29763e-211	3.1029e-207	210.887	206.508	0.604311	0.808	0.444
Tbcb	3.57438e-211	8.54705e-207	210.447	206.068	0.551708	0.917	0.564
Atp5o	4.26171e-211	1.01906e-206	210.37	205.992	0.574953	0.95	0.619
Mlf2	5.5898e-211	1.33663e-206	210.253	205.874	0.571669	0.849	0.479
Srgap2	9.6477e-211	2.30696e-206	210.016	205.637	-1.44622	0.964	0.904
Fxyd5	1.71529e-210	4.10159e-206	209.766	205.387	0.314591	0.909	0.546
Ufm1	1.95758e-210	4.68097e-206	209.708	205.33	0.574005	0.765	0.417
Galc	2.14643e-210	5.13254e-206	209.668	205.29	0.534354	0.719	0.373
Frmd4a	2.41437e-210	5.77324e-206	209.617	205.239	-1.73189	0.848	0.82
Cops6	4.02302e-210	9.61983e-206	209.395	205.017	0.567909	0.812	0.453
Nrbf2	1.66881e-209	3.99046e-205	208.778	204.399	0.573435	0.652	0.328
Krtcap2	3.30681e-209	7.90725e-205	208.481	204.102	0.563336	0.969	0.66
Psma7	3.5411e-209	8.46748e-205	208.451	204.072	0.556745	0.964	0.652
Coro1c	5.15097e-209	1.2317e-204	208.288	203.909	0.510753	0.768	0.411
Mgst3	5.52346e-209	1.32077e-204	208.258	203.879	0.767099	0.581	0.28
Sod2	6.66569e-209	1.5939e-204	208.176	203.798	0.599183	0.76	0.411
Mrps18a	9.11308e-209	2.17912e-204	208.04	203.662	0.553559	0.749	0.403
Mrps24	9.90078e-209	2.36748e-204	208.004	203.626	0.537516	0.886	0.524
Eef1a1	2.00359e-208	4.79098e-204	207.698	203.32	0.430945	1	0.933
Dpm3	2.11542e-208	5.0584e-204	207.675	203.296	0.535348	0.935	0.577
Scpep1	6.17957e-208	1.47766e-203	207.209	202.83	0.54824	0.842	0.479
Arl8a	9.16861e-208	2.1924e-203	207.038	202.659	0.505671	0.758	0.402
Sin3b	9.41489e-208	2.25129e-203	207.026	202.648	0.526355	0.905	0.545
Fam50a	1.18333e-207	2.82959e-203	206.927	202.548	0.557724	0.768	0.413
Cope	1.75926e-207	4.20674e-203	206.755	202.376	0.566452	0.87	0.519
Tmem106a	1.825e-207	4.36395e-203	206.739	202.36	0.58103	0.686	0.352
Psmb4	1.90572e-207	4.55695e-203	206.72	202.341	0.57936	0.932	0.593
Mrpl11	3.73929e-207	8.9414e-203	206.427	202.049	0.573162	0.748	0.396
Vcp	4.73282e-207	1.13171e-202	206.325	201.946	0.56872	0.95	0.619
Fam162a	5.41905e-207	1.2958e-202	206.266	201.887	0.655633	0.756	0.411
Cox5a	6.28063e-207	1.50182e-202	206.202	201.823	0.573197	0.975	0.67
Igf2r	7.33641e-207	1.75428e-202	206.135	201.756	1.12212	0.389	0.154
Cln5	1.14218e-206	2.73117e-202	205.942	201.564	0.553437	0.729	0.386
Eif3c	1.65633e-206	3.96062e-202	205.781	201.402	0.55746	0.969	0.663
Yif1b	1.74444e-206	4.1713e-202	205.758	201.38	0.602316	0.801	0.439
Oaz1	1.86433e-206	4.45799e-202	205.729	201.351	0.497891	0.995	0.779
Tomm6	4.23585e-206	1.01288e-201	205.373	200.994	0.49809	0.975	0.668
Coq7	1.2099e-205	2.89311e-201	204.917	200.539	0.685474	0.629	0.312
Mrpl17	1.34637e-205	3.21944e-201	204.871	200.492	0.539829	0.802	0.445
Cxcl14	2.41898e-205	5.78427e-201	204.616	200.238	1.25152	0.319	0.111
Map1lc3b	2.73869e-205	6.54875e-201	204.562	200.184	0.497044	0.948	0.619
Nav2	3.21009e-205	7.67597e-201	204.493	200.115	-1.94009	0.884	0.857
Ebpl	5.49681e-205	1.3144e-200	204.26	199.881	0.680688	0.63	0.316
Got1	6.36677e-205	1.52242e-200	204.196	199.817	0.636497	0.6	0.29
Atp5md	1.49535e-204	3.57569e-200	203.825	199.447	0.493089	0.972	0.671
Chmp2a	1.67482e-204	4.00483e-200	203.776	199.397	0.52944	0.939	0.601
Rars	2.04461e-204	4.88908e-200	203.689	199.311	0.583069	0.738	0.396
Tmem120a	2.19426e-204	5.2469e-200	203.659	199.28	0.884791	0.466	0.204
Eef1g	2.88096e-204	6.88896e-200	203.54	199.162	0.549008	0.973	0.676
Renbp	4.17719e-204	9.98848e-200	203.379	199.001	0.454756	0.845	0.486
Slc25a3	4.29472e-204	1.02695e-199	203.367	198.988	0.509074	0.986	0.709
Blvra	4.81879e-204	1.15227e-199	203.317	198.938	0.543117	0.74	0.39
Pdcd5	7.59744e-204	1.8167e-199	203.119	198.741	0.53187	0.925	0.581
Mrps14	1.13704e-203	2.71889e-199	202.944	198.566	0.529934	0.902	0.547
Tomm20	1.93748e-203	4.63291e-199	202.713	198.334	0.535826	0.962	0.636
Timm17a	2.04429e-203	4.8883e-199	202.689	198.311	0.602016	0.691	0.361
Mrpl41	6.69401e-203	1.60067e-198	202.174	197.796	0.588437	0.684	0.349
Guca1a	1.86277e-202	4.45425e-198	201.73	197.351	0.600985	0.603	0.296
Psmd2	2.995e-202	7.16164e-198	201.524	197.145	0.546648	0.84	0.477
Prkcsh	3.15045e-202	7.53336e-198	201.502	197.123	0.535319	0.732	0.39
Snapc5	4.29013e-202	1.02586e-197	201.368	196.989	0.489279	0.806	0.444
Znhit1	6.75741e-202	1.61583e-197	201.17	196.792	0.515256	0.763	0.41
Sem1	2.14193e-201	5.12178e-197	200.669	196.291	0.486885	0.991	0.762
Ptpmt1	3.06021e-201	7.31758e-197	200.514	196.136	0.604904	0.729	0.389
Ddost	4.50179e-201	1.07647e-196	200.347	195.968	0.541838	0.923	0.564
Cox6c	4.89854e-201	1.17134e-196	200.31	195.931	0.462006	0.992	0.78
Bbln	5.40871e-201	1.29333e-196	200.267	195.888	0.661021	0.538	0.253
Cd14	7.8002e-201	1.86518e-196	200.108	195.729	0.920525	0.792	0.469
Gm57058	1.1944e-200	2.85604e-196	199.923	195.544	0.854279	0.408	0.165
Inpp5d	1.23805e-200	2.96042e-196	199.907	195.529	-1.15186	0.978	0.918
Timm10	2.15313e-200	5.14857e-196	199.667	195.288	0.619359	0.586	0.282
Mrpl36	3.30187e-200	7.89543e-196	199.481	195.103	0.521271	0.797	0.441
Atp5d	3.63746e-200	8.69789e-196	199.439	195.061	0.523072	0.964	0.645
Chmp6	4.31765e-200	1.03244e-195	199.365	194.986	0.695608	0.552	0.263
Atp5mpl	4.33304e-200	1.03612e-195	199.363	194.985	0.490678	0.98	0.706
Sec11c	9.76555e-200	2.33514e-195	199.01	194.632	0.535792	0.975	0.7
Ptms	1.0366e-199	2.47871e-195	198.984	194.606	0.521971	0.99	0.741
Pdap1	1.54678e-199	3.69867e-195	198.811	194.432	0.542851	0.922	0.567
Acot13	1.82005e-199	4.35212e-195	198.74	194.361	0.474713	0.78	0.424
Rpl35	2.06853e-199	4.94626e-195	198.684	194.306	0.455651	0.999	0.807
Cenpx	2.22474e-199	5.31979e-195	198.653	194.274	0.52316	0.921	0.562
Gtf2h5	3.97359e-199	9.50164e-195	198.401	194.022	0.516662	0.876	0.517
Napa	8.26482e-199	1.97628e-194	198.083	193.704	0.472857	0.768	0.424
Gstm5	9.51803e-199	2.27595e-194	198.021	193.643	0.723161	0.545	0.258
Slirp	1.01859e-198	2.43565e-194	197.992	193.613	0.505706	0.902	0.536
Malat1	1.57198e-198	3.75892e-194	197.804	193.425	-0.997455	0.994	0.988
Gba	3.10235e-198	7.41833e-194	197.508	193.13	0.547085	0.753	0.403
Tmem208	4.67492e-198	1.11787e-193	197.33	192.952	0.522409	0.879	0.52
Crtap	5.36348e-198	1.28252e-193	197.271	192.892	0.957754	0.436	0.187
Ndufaf8	7.09286e-198	1.69604e-193	197.149	192.771	0.485976	0.821	0.457
Plaur	8.25779e-198	1.9746e-193	197.083	192.705	1.00496	0.389	0.157
Pbdc1	1.21317e-197	2.90093e-193	196.916	192.537	0.563589	0.664	0.336
Ost4	1.22742e-197	2.93502e-193	196.911	192.532	0.507562	0.962	0.649
Tma7	4.74513e-197	1.13466e-192	196.324	191.945	0.500823	0.979	0.705
Arhgdia	4.79346e-197	1.14621e-192	196.319	191.941	0.517144	0.969	0.659
Mrpl28	5.03303e-197	1.2035e-192	196.298	191.92	0.570887	0.763	0.408
Ndufb9	1.26297e-196	3.02001e-192	195.899	191.52	0.518644	0.964	0.651
Atp5b	2.22215e-196	5.31361e-192	195.653	191.275	0.528754	0.973	0.669
1700003F12Rik	4.09966e-196	9.8031e-192	195.387	191.009	0.91231	0.401	0.164
Gtf3c6	4.19606e-196	1.00336e-191	195.377	190.999	0.532219	0.706	0.368
Rpl12	5.9693e-196	1.42738e-191	195.224	190.845	0.429129	0.998	0.88
Sfr1	7.34919e-196	1.75734e-191	195.134	190.755	0.530964	0.87	0.512
Bag1	8.29602e-196	1.98374e-191	195.081	190.703	0.520522	0.965	0.651
Slc25a39	9.29845e-196	2.22345e-191	195.032	190.653	0.560979	0.771	0.423
Sar1a	9.57711e-196	2.29008e-191	195.019	190.64	0.501365	0.731	0.39
Hras	1.02005e-195	2.43914e-191	194.991	190.613	0.56537	0.747	0.404
Arpc5	1.22042e-195	2.91827e-191	194.913	190.535	0.499233	0.97	0.665
Pfdn1	1.31216e-195	3.13764e-191	194.882	190.503	0.502948	0.865	0.509
Arpc1b	2.17495e-195	5.20074e-191	194.663	190.284	0.45186	0.997	0.798
Psmd6	2.47488e-195	5.91794e-191	194.606	190.228	0.549195	0.827	0.474
Tmed9	2.83467e-195	6.77825e-191	194.547	190.169	0.520402	0.957	0.635
Eif4ebp1	5.10451e-195	1.22059e-190	194.292	189.913	0.526317	0.764	0.418
Rps28	5.50331e-195	1.31595e-190	194.259	189.881	0.393717	1	0.924
Lamtor2	7.03211e-195	1.68152e-190	194.153	189.774	0.523826	0.944	0.614
Mea1	9.09248e-195	2.17419e-190	194.041	189.663	0.559668	0.684	0.359
Maged1	1.08673e-194	2.59858e-190	193.964	189.585	0.610747	0.536	0.251
Vma21	1.18245e-194	2.82746e-190	193.927	189.549	0.509576	0.746	0.4
Bccip	1.23348e-194	2.9495e-190	193.909	189.53	0.523942	0.642	0.327
Nenf	1.77122e-194	4.23533e-190	193.752	189.373	0.550486	0.852	0.491
Snx3	3.00672e-194	7.18966e-190	193.522	189.143	0.50999	0.954	0.638
Ndufs8	4.80333e-194	1.14857e-189	193.318	188.94	0.505497	0.895	0.533
S100a13	6.03337e-194	1.4427e-189	193.219	188.841	0.486397	0.907	0.546
Clptm1l	1.08104e-193	2.58498e-189	192.966	188.588	0.443621	0.815	0.456
Myo5a	1.92493e-193	4.6029e-189	192.716	188.337	0.413849	0.803	0.441
Chd9	3.00234e-193	7.1792e-189	192.523	188.144	-1.56588	0.932	0.858
Rwdd1	3.35076e-193	8.01234e-189	192.475	188.096	0.512788	0.855	0.495
Calm3	3.40919e-193	8.15205e-189	192.467	188.089	0.503234	0.945	0.603
Cox8a	4.02053e-193	9.61389e-189	192.396	188.017	0.452595	0.995	0.792
Dpcd	6.95736e-193	1.66364e-188	192.158	187.779	0.515047	0.7	0.369
Rpl31	8.51482e-193	2.03606e-188	192.07	187.691	0.454239	0.998	0.799
Yif1a	9.12825e-193	2.18275e-188	192.04	187.661	0.636207	0.604	0.303
Cct3	1.00316e-192	2.39876e-188	191.999	187.62	0.517252	0.854	0.493
Ap2m1	1.36656e-192	3.26771e-188	191.864	187.486	0.551518	0.883	0.539
Rab5if	3.70341e-192	8.85559e-188	191.431	187.053	0.539327	0.94	0.599
Ssh2	6.80207e-192	1.62651e-187	191.167	186.789	-1.35186	0.916	0.867
Ddx21	8.17354e-192	1.95446e-187	191.088	186.709	0.513131	0.82	0.47
Guk1	8.98231e-192	2.14785e-187	191.047	186.668	0.660415	0.578	0.284
Plekha8	1.52251e-191	3.64062e-187	190.817	186.439	0.545703	0.523	0.244
Arhgap10	1.74085e-191	4.16272e-187	190.759	186.381	0.68664	0.489	0.223
Ssr4	1.85057e-191	4.42509e-187	190.733	186.354	0.472337	0.995	0.776
Arap2	3.06466e-191	7.3282e-187	190.514	186.135	0.601297	0.41	0.17
Ms4a6d	4.51007e-191	1.07845e-186	190.346	185.967	0.599395	0.915	0.604
Elovl1	5.05082e-191	1.20775e-186	190.297	185.918	0.560101	0.671	0.344
2810001A02Rik	7.84843e-191	1.87672e-186	190.105	185.727	0.538923	0.833	0.491
Lamtor5	1.1562e-190	2.76471e-186	189.937	185.558	0.486048	0.899	0.546
Vdac1	1.66308e-190	3.97677e-186	189.779	185.4	0.504414	0.901	0.54
Eif2s1	1.70203e-190	4.06989e-186	189.769	185.39	0.46931	0.851	0.488
Cycs	2.27348e-190	5.43636e-186	189.643	185.265	0.519056	0.873	0.51
Morf4l2	2.48912e-190	5.95199e-186	189.604	185.225	0.495505	0.833	0.477
Rap2a	3.70554e-190	8.86068e-186	189.431	185.053	0.502401	0.854	0.508
Psma4	4.10101e-190	9.80634e-186	189.387	185.008	0.515998	0.924	0.571
Eif3i	6.10345e-190	1.45946e-185	189.214	184.836	0.540936	0.906	0.548
Adcy3	8.55236e-190	2.04504e-185	189.068	184.689	0.816693	0.36	0.141
Ddx41	1.05727e-189	2.52815e-185	188.976	184.597	0.518896	0.636	0.324
Sec13	1.73893e-189	4.15813e-185	188.76	184.381	0.502318	0.778	0.431
Polr2f	1.9623e-189	4.69224e-185	188.707	184.329	0.470453	0.88	0.518
Coprs	2.21714e-189	5.30163e-185	188.654	184.276	0.748639	0.48	0.217
Tmem147	2.37346e-189	5.67542e-185	188.625	184.246	0.518912	0.792	0.444
Park7	2.50401e-189	5.9876e-185	188.601	184.223	0.503992	0.965	0.66
Mdh1	4.86603e-189	1.16356e-184	188.313	183.934	0.523187	0.902	0.554
Mrps21	5.96921e-189	1.42736e-184	188.224	183.845	0.477165	0.943	0.605
Scd2	6.33955e-189	1.51591e-184	188.198	183.819	0.529939	0.683	0.355
Psmc4	1.84221e-188	4.40509e-184	187.735	183.356	0.482484	0.789	0.44
Polr2i	2.63301e-188	6.29604e-184	187.58	183.201	0.492189	0.801	0.447
Chchd1	3.54485e-188	8.47644e-184	187.45	183.072	0.453786	0.862	0.5
Taf10	3.76413e-188	9.00079e-184	187.424	183.046	0.515633	0.913	0.564
Ccdc86	3.84571e-188	9.19586e-184	187.415	183.036	0.551883	0.609	0.301
Cnpy2	4.08635e-188	9.77128e-184	187.389	183.01	0.498334	0.916	0.575
Svbp	4.40153e-188	1.05249e-183	187.356	182.978	0.472022	0.863	0.503
Hcfc1r1	4.73253e-188	1.13164e-183	187.325	182.946	0.517503	0.839	0.489
Ift20	7.46886e-188	1.78595e-183	187.127	182.748	0.470455	0.811	0.465
Pea15a	7.9711e-188	1.90605e-183	187.098	182.72	0.482774	0.844	0.486
Uqcrb	7.99227e-188	1.91111e-183	187.097	182.719	0.485101	0.978	0.684
Mdh2	4.09302e-187	9.78722e-183	186.388	182.009	0.48597	0.876	0.524
G530011O06Rik	4.44252e-187	1.0623e-182	186.352	181.974	0.862834	0.472	0.215
Ndufs7	6.24965e-187	1.49442e-182	186.204	181.826	0.498292	0.899	0.548
Spg21	7.1448e-187	1.70847e-182	186.146	181.767	0.506115	0.74	0.399
Hypk	1.70299e-186	4.0722e-182	185.769	181.39	0.51949	0.7	0.372
Ap1s1	2.24371e-186	5.36516e-182	185.649	181.27	0.481327	0.709	0.377
Rrp1	3.08049e-186	7.36607e-182	185.511	181.133	0.485018	0.825	0.47
Tmed2	3.12209e-186	7.46554e-182	185.506	181.127	0.489797	0.921	0.581
Mtln	9.95351e-186	2.38008e-181	185.002	180.623	0.474668	0.792	0.445
Gphn	1.01772e-185	2.43358e-181	184.992	180.614	-1.41534	0.974	0.935
Ndufa8	1.13221e-185	2.70734e-181	184.946	180.567	0.511165	0.912	0.549
Sdcbp	1.28071e-185	3.06243e-181	184.893	180.514	0.4784	0.986	0.746
Adam9	1.28988e-185	3.08436e-181	184.889	180.511	0.471343	0.695	0.375
Akr1b3	1.34021e-185	3.20471e-181	184.873	180.494	0.511675	0.883	0.531
Cyc1	2.035e-185	4.86609e-181	184.691	180.313	0.500506	0.812	0.46
Gaa	3.4318e-185	8.20612e-181	184.464	180.086	0.50012	0.671	0.348
Glrx5	3.48104e-185	8.32386e-181	184.458	180.08	0.504402	0.748	0.411
Lpcat2	3.56438e-185	8.52315e-181	184.448	180.069	-1.02482	0.953	0.873
Tmem205	4.86997e-185	1.16451e-180	184.312	179.934	0.726604	0.514	0.243
Myl12a	6.36763e-185	1.52263e-180	184.196	179.817	0.485176	0.93	0.571
Iqgap1	8.08078e-185	1.93228e-180	184.093	179.714	0.357316	0.751	0.399
Mrpl35	8.5279e-185	2.03919e-180	184.069	179.691	0.529198	0.672	0.351
Smim29	9.84439e-185	2.35399e-180	184.007	179.628	0.491609	0.817	0.465
Mfsd1	1.10795e-184	2.64934e-180	183.955	179.577	0.496937	0.882	0.525
Ciao2b	1.21341e-184	2.90151e-180	183.916	179.537	0.500348	0.791	0.439
M6pr	1.41178e-184	3.37586e-180	183.85	179.472	0.511932	0.912	0.561
Ncl	3.22005e-184	7.69979e-180	183.492	179.114	0.521778	0.982	0.713
Gpx4	3.99472e-184	9.55218e-180	183.399	179.02	0.497362	0.982	0.699
Psmc5	5.30349e-184	1.26817e-179	183.275	178.897	0.48329	0.866	0.513
Pno1	6.06433e-184	1.4501e-179	183.217	178.839	0.668816	0.561	0.277
Rraga	1.12687e-183	2.69458e-179	182.948	178.57	0.599955	0.597	0.302
Mrpl53	1.18063e-183	2.82312e-179	182.928	178.549	0.472096	0.698	0.369
Psma2	1.27152e-183	3.04045e-179	182.896	178.517	0.497479	0.937	0.595
1810009A15Rik	2.12958e-183	5.09225e-179	182.672	178.293	0.47973	0.826	0.471
Ehd1	2.43975e-183	5.83393e-179	182.613	178.234	0.688457	0.42	0.18
Serp1	4.86834e-183	1.16412e-178	182.313	177.934	0.48935	0.918	0.583
Nolc1	5.95269e-183	1.42341e-178	182.225	177.847	0.651041	0.561	0.277
Mapkapk2	8.12378e-183	1.94256e-178	182.09	177.712	0.403664	0.828	0.468
Ddx39a	8.27981e-183	1.97987e-178	182.082	177.703	0.592171	0.641	0.333
Lsm12	1.55981e-182	3.72983e-178	181.807	177.428	0.488114	0.822	0.467
Srp9	1.81397e-182	4.33757e-178	181.741	177.363	0.499531	0.93	0.588
Aig1	2.59421e-182	6.20328e-178	181.586	177.207	0.295722	0.803	0.457
Cisd1	6.72471e-182	1.60801e-177	181.172	176.794	0.529529	0.708	0.381
Eloc	8.08002e-182	1.93209e-177	181.093	176.714	0.486796	0.938	0.599
Naa20	1.34544e-181	3.21721e-177	180.871	176.493	0.441077	0.827	0.479
Txnl4a	1.51584e-181	3.62469e-177	180.819	176.441	0.534699	0.675	0.359
Mybbp1a	1.6823e-181	4.02271e-177	180.774	176.395	0.547283	0.684	0.364
Hebp1	1.81141e-181	4.33144e-177	180.742	176.363	0.493851	0.851	0.501
Tm2d2	2.37051e-181	5.66835e-177	180.625	176.247	0.477357	0.797	0.449
Cox7c	5.63887e-181	1.34837e-176	180.249	175.87	0.431375	0.993	0.792
Jtb	8.09015e-181	1.93452e-176	180.092	175.713	0.48735	0.803	0.454
Ccdc124	1.0479e-180	2.50575e-176	179.98	175.601	0.486959	0.718	0.386
Stub1	1.16801e-180	2.79294e-176	179.933	175.554	0.485263	0.793	0.439
Uqcrc1	1.33584e-180	3.19425e-176	179.874	175.496	0.487022	0.805	0.463
Ube2l3	1.3379e-180	3.19919e-176	179.874	175.495	0.471686	0.957	0.651
Clta	1.88049e-180	4.49662e-176	179.726	175.347	0.41702	0.998	0.851
Cox7a2	1.91454e-180	4.57804e-176	179.718	175.339	0.474301	0.979	0.7
Sntb2	2.20786e-180	5.27943e-176	179.656	175.277	0.437854	0.501	0.236
Dpp7	2.39382e-180	5.7241e-176	179.621	175.242	0.548843	0.624	0.319
Rnasek	2.91956e-180	6.98125e-176	179.535	175.156	0.471834	0.984	0.714
Hint1	4.75065e-180	1.13598e-175	179.323	174.945	0.493788	0.989	0.735
Card19	6.20942e-180	1.4848e-175	179.207	174.828	0.479779	0.731	0.399
Camk1d	6.73253e-180	1.60988e-175	179.172	174.793	-0.780995	1	0.992
Emc7	9.09974e-180	2.17593e-175	179.041	174.662	0.486955	0.888	0.538
Cuedc2	1.54115e-179	3.68519e-175	178.812	174.434	0.459901	0.882	0.524
Fdx1	1.67302e-179	4.00053e-175	178.776	174.398	0.605688	0.522	0.25
Txndc5	1.72167e-179	4.11686e-175	178.764	174.385	0.568528	0.575	0.287
Micos13	1.72277e-179	4.11949e-175	178.764	174.385	0.501744	0.943	0.597
Etfb	4.11467e-179	9.839e-175	178.386	174.007	0.489169	0.919	0.572
Srp19	4.76036e-179	1.1383e-174	178.322	173.944	0.470829	0.85	0.501
Copb2	5.02128e-179	1.20069e-174	178.299	173.921	0.509922	0.819	0.479
Flna	6.1169e-179	1.46267e-174	178.213	173.835	0.498537	0.692	0.369
Sap18	6.35706e-179	1.5201e-174	178.197	173.818	0.464929	0.729	0.398
Lman1	6.7259e-179	1.6083e-174	178.172	173.794	0.504084	0.845	0.503
Rpl36al	7.25735e-179	1.73538e-174	178.139	173.761	0.441141	0.996	0.79
Psmd7	8.85401e-179	2.11717e-174	178.053	173.674	0.478419	0.816	0.467
Mrpl42	9.83959e-179	2.35284e-174	178.007	173.628	0.444521	0.858	0.501
Eif2s2	1.05579e-178	2.52459e-174	177.976	173.598	0.471725	0.983	0.696
Vegfb	1.17311e-178	2.80515e-174	177.931	173.552	0.520223	0.781	0.432
Tpd52	2.06861e-178	4.94646e-174	177.684	173.306	0.40291	0.974	0.72
Leprotl1	2.09002e-178	4.99765e-174	177.68	173.301	0.430731	0.81	0.453
Etf1	2.14017e-178	5.11757e-174	177.67	173.291	0.419054	0.829	0.479
Tbca	2.72404e-178	6.51372e-174	177.565	173.186	0.466821	0.966	0.659
Bcl2	2.73364e-178	6.53667e-174	177.563	173.185	0.507644	0.463	0.212
Fam89b	4.63118e-178	1.10741e-173	177.334	172.956	0.530145	0.654	0.34
Cmss1	8.33479e-178	1.99301e-173	177.079	172.7	-0.990061	0.995	0.991
Mrpl57	1.49145e-177	3.56637e-173	176.826	172.448	0.446866	0.816	0.463
Comtd1	1.85991e-177	4.44742e-173	176.731	172.352	0.50323	0.637	0.333
Got2	2.26321e-177	5.41179e-173	176.645	172.267	0.55691	0.643	0.338
Fuca1	3.27407e-177	7.82895e-173	176.485	172.106	0.466431	0.945	0.623
Ten1	3.75402e-177	8.97662e-173	176.426	172.047	0.494793	0.79	0.444
Snhg3	7.35249e-177	1.75813e-172	176.134	171.755	0.520139	0.594	0.305
Psmc1	7.44688e-177	1.7807e-172	176.128	171.749	0.455485	0.782	0.443
Coa3	1.83203e-176	4.38075e-172	175.737	171.358	0.479378	0.87	0.512
Txn2	2.22392e-176	5.31784e-172	175.653	171.274	0.466727	0.733	0.396
Phb2	2.64143e-176	6.3162e-172	175.578	171.2	0.502543	0.824	0.475
Rbis	2.65142e-176	6.34008e-172	175.577	171.198	0.423411	0.861	0.505
Tmem167	2.97097e-176	7.10419e-172	175.527	171.148	0.433062	0.896	0.551
H2aj	3.86698e-176	9.24673e-172	175.413	171.034	0.448353	0.933	0.605
Hspa9	4.00735e-176	9.58237e-172	175.397	171.019	0.437833	0.782	0.432
Rps19	5.41759e-176	1.29545e-171	175.266	170.888	0.39985	1	0.899
Adh5	5.42156e-176	1.2964e-171	175.266	170.887	0.484547	0.827	0.477
Snrpd2	5.80654e-176	1.38846e-171	175.236	170.857	0.472612	0.943	0.606
Ykt6	1.36006e-175	3.25217e-171	174.866	170.488	0.390865	0.752	0.422
Nop10	2.10971e-175	5.04474e-171	174.676	170.297	0.442291	0.87	0.511
Atpif1	3.10061e-175	7.41419e-171	174.509	170.13	0.468747	0.986	0.734
Eif6	3.40046e-175	8.13119e-171	174.468	170.09	0.487454	0.758	0.42
Sdhb	3.4586e-175	8.27021e-171	174.461	170.082	0.47443	0.898	0.547
Rpl8	4.08275e-175	9.76266e-171	174.389	170.01	0.416177	1	0.858
Ddt	7.67149e-175	1.83441e-170	174.115	169.737	0.484163	0.715	0.389
Gnl3	1.24019e-174	2.96554e-170	173.907	169.528	0.522558	0.611	0.316
Psmb3	1.74408e-174	4.17044e-170	173.758	169.38	0.509507	0.93	0.609
Acaa2	3.56972e-174	8.5359e-170	173.447	169.069	0.527609	0.616	0.316
Vps13c	3.91844e-174	9.36977e-170	173.407	169.028	0.438928	0.898	0.562
Atp5l	4.04356e-174	9.66896e-170	173.393	169.015	0.427557	0.988	0.76
Emc4	4.4273e-174	1.05866e-169	173.354	168.975	0.541022	0.609	0.311
Uba1	5.34765e-174	1.27873e-169	173.272	168.893	0.475408	0.78	0.441
Nlrc3	7.00063e-174	1.67399e-169	173.155	168.776	1.15204	0.242	0.078
Htr2b	7.1635e-174	1.71294e-169	173.145	168.766	1.28095	0.277	0.097
Atp6v1d	1.39017e-173	3.32417e-169	172.857	168.478	0.452874	0.899	0.546
Smim7	3.41517e-173	8.16635e-169	172.467	168.088	0.446618	0.702	0.378
Masp1	3.62099e-173	8.65851e-169	172.441	168.063	0.872288	0.297	0.108
Tcp1	3.71215e-173	8.8765e-169	172.43	168.052	0.471558	0.874	0.521
Mrps12	6.51842e-173	1.55869e-168	172.186	167.807	0.483408	0.683	0.363
Dmac1	6.74249e-173	1.61226e-168	172.171	167.793	0.481555	0.693	0.38
Selenos	7.28812e-173	1.74274e-168	172.137	167.759	0.478005	0.932	0.586
Htatip2	1.35764e-172	3.24639e-168	171.867	167.489	0.619859	0.523	0.253
Akirin1	1.59008e-172	3.80219e-168	171.799	167.42	0.481154	0.888	0.551
AI506816	2.87508e-172	6.87488e-168	171.541	167.163	0.490722	0.758	0.416
Atp6v0d1	5.57349e-172	1.33273e-167	171.254	166.875	0.430505	0.911	0.567
Cct6a	7.47357e-172	1.78708e-167	171.126	166.748	0.491006	0.869	0.522
Agpat5	9.97069e-172	2.38419e-167	171.001	166.623	0.442999	0.717	0.392
Ndufa13	1.11159e-171	2.65804e-167	170.954	166.575	0.465612	0.985	0.715
Wdr83os	1.19247e-171	2.85144e-167	170.924	166.545	0.45735	0.884	0.541
Nans	1.56322e-171	3.73797e-167	170.806	166.427	0.537812	0.641	0.336
Fkbp1a	1.78058e-171	4.25773e-167	170.749	166.371	0.439845	0.839	0.486
Suclg1	4.00169e-171	9.56884e-167	170.398	166.019	0.415173	0.783	0.44
Timm8a1	4.24195e-171	1.01434e-166	170.372	165.994	0.720512	0.476	0.223
Arhgdib	4.49264e-171	1.07428e-166	170.347	165.969	0.44405	0.99	0.758
Wdr1	7.15545e-171	1.71101e-166	170.145	165.767	0.438578	0.886	0.535
Aldh2	1.33659e-170	3.19606e-166	169.874	165.495	0.458807	0.825	0.473
Pin1	1.70332e-170	4.07299e-166	169.769	165.39	0.466889	0.722	0.392
Tgoln1	1.8277e-170	4.3704e-166	169.738	165.359	0.440454	0.82	0.475
Cct2	1.83289e-170	4.3828e-166	169.737	165.358	0.484451	0.927	0.578
Naxe	2.09878e-170	5.0186e-166	169.678	165.299	0.451371	0.75	0.413
Hsd17b10	2.30834e-170	5.51971e-166	169.637	165.258	0.504505	0.697	0.378
Ccdc107	3.23134e-170	7.72679e-166	169.491	165.112	0.415242	0.692	0.371
Arl6ip4	3.74345e-170	8.95133e-166	169.427	165.048	0.480733	0.73	0.402
Atic	3.80554e-170	9.0998e-166	169.42	165.041	0.644206	0.529	0.26
Eif1	5.19697e-170	1.2427e-165	169.284	164.906	0.405144	0.996	0.783
Rpl15	5.20026e-170	1.24349e-165	169.284	164.905	0.418137	0.999	0.851
Pag1	6.01534e-170	1.43839e-165	169.221	164.842	-1.48277	0.881	0.842
Dnajb9	7.26019e-170	1.73606e-165	169.139	164.76	0.53321	0.593	0.302
Nes	7.64058e-170	1.82702e-165	169.117	164.738	1.4406	0.301	0.114
Ifi30	1.09499e-169	2.61835e-165	168.961	164.582	0.481229	0.987	0.743
Ifi207	1.39696e-169	3.3404e-165	168.855	164.476	0.448278	0.681	0.36
Rpl13	2.25741e-169	5.39791e-165	168.646	164.268	0.383734	1	0.935
Pet100	2.26196e-169	5.40881e-165	168.646	164.267	0.400603	0.919	0.573
Erp29	2.45942e-169	5.88097e-165	168.609	164.231	0.434728	0.992	0.803
Mrpl55	3.31446e-169	7.92555e-165	168.48	164.101	0.507083	0.596	0.302
Cdv3	3.69339e-169	8.83163e-165	168.433	164.054	0.47347	0.83	0.477
Nagk	3.80125e-169	9.08956e-165	168.42	164.041	0.415638	0.732	0.406
Smim30	4.88065e-169	1.16706e-164	168.312	163.933	0.450022	0.727	0.403
Dctn3	4.90339e-169	1.1725e-164	168.31	163.931	0.451344	0.834	0.493
Cers2	5.11166e-169	1.2223e-164	168.291	163.913	0.427096	0.759	0.426
Dynlrb1	5.54286e-169	1.32541e-164	168.256	163.878	0.432854	0.91	0.579
Rpl14	9.50751e-169	2.27344e-164	168.022	163.643	0.426423	0.998	0.825
Dynlt3	9.87992e-169	2.36249e-164	168.005	163.627	0.488853	0.705	0.379
Commd9	1.07589e-168	2.57267e-164	167.968	163.59	0.4345	0.664	0.351
Reep5	1.18434e-168	2.83198e-164	167.927	163.548	0.471651	0.98	0.695
D8Ertd738e	1.35874e-168	3.24902e-164	167.867	163.488	0.44046	0.946	0.624
Ddb1	1.37994e-168	3.29972e-164	167.86	163.482	0.42019	0.716	0.39
Gpi1	1.80337e-168	4.31222e-164	167.744	163.365	0.456675	0.898	0.562
Smim11	3.7272e-168	8.91248e-164	167.429	163.05	0.432701	0.798	0.448
Cmas	3.94751e-168	9.43928e-164	167.404	163.025	0.312804	0.705	0.377
Dnajc3	8.20304e-168	1.96151e-163	167.086	162.707	0.485573	0.915	0.593
Rps15a	8.31879e-168	1.98919e-163	167.08	162.701	0.386745	1	0.903
Lamtor4	1.74234e-167	4.16629e-163	166.759	162.38	0.474867	0.974	0.689
Trappc2l	1.76735e-167	4.22608e-163	166.753	162.374	0.465133	0.887	0.532
Eif5b	3.66677e-167	8.76799e-163	166.436	162.057	0.434517	0.952	0.64
Galns	3.90463e-167	9.33676e-163	166.408	162.03	0.446575	0.552	0.273
Fuca2	4.58947e-167	1.09743e-162	166.338	161.96	0.405927	0.813	0.47
Dap	5.45007e-167	1.30322e-162	166.264	161.885	0.404589	0.718	0.398
Emc6	5.45697e-167	1.30487e-162	166.263	161.884	0.419898	0.791	0.443
Znrd2	7.08436e-167	1.69401e-162	166.15	161.771	0.569076	0.567	0.287
Rps17	1.20472e-166	2.88072e-162	165.919	161.54	0.414225	0.998	0.836
Sdhc	1.23057e-166	2.94255e-162	165.91	161.531	0.408155	0.801	0.459
Fuom	1.5714e-166	3.75752e-162	165.804	161.425	0.824703	0.418	0.188
Ndufb5	1.72869e-166	4.13363e-162	165.762	161.384	0.462484	0.946	0.615
Itgb1bp1	1.8883e-166	4.51531e-162	165.724	161.345	0.437113	0.62	0.323
2310039H08Rik	2.32048e-166	5.54874e-162	165.634	161.256	0.679089	0.475	0.227
Mrpl21	2.33249e-166	5.57744e-162	165.632	161.254	0.447605	0.731	0.406
Arhgap5	2.84283e-166	6.79779e-162	165.546	161.168	-1.38417	0.874	0.826
Mrpl58	3.57359e-166	8.54517e-162	165.447	161.068	0.483064	0.69	0.371
Ddx54	3.78258e-166	9.04491e-162	165.422	161.044	0.542132	0.585	0.297
Eef1akmt1	3.80369e-166	9.09539e-162	165.42	161.041	0.525358	0.545	0.275
Ube2v1	5.00257e-166	1.19622e-161	165.301	160.922	0.423275	0.72	0.395
Amdhd2	5.16917e-166	1.23605e-161	165.287	160.908	0.420772	0.674	0.358
Glrx2	5.49456e-166	1.31386e-161	165.26	160.881	0.435083	0.727	0.405
Plin3	8.19934e-166	1.96063e-161	165.086	160.708	0.650255	0.487	0.237
Tspan31	1.13723e-165	2.71935e-161	164.944	160.566	0.470899	0.71	0.389
Cacybp	1.47833e-165	3.53498e-161	164.83	160.452	0.473627	0.829	0.483
Gpr137b	1.8992e-165	4.54137e-161	164.721	160.343	0.412817	0.56	0.279
Srp14	2.09323e-165	5.00534e-161	164.679	160.301	0.453644	0.958	0.643
Snap29	2.70583e-165	6.47017e-161	164.568	160.189	0.450191	0.595	0.306
Psma6	2.7557e-165	6.58942e-161	164.56	160.181	0.420668	0.875	0.52
Mrps18b	3.564e-165	8.52223e-161	164.448	160.069	0.645008	0.494	0.24
Naa50	6.04415e-165	1.44528e-160	164.219	159.84	0.445738	0.822	0.469
Dcxr	1.00249e-164	2.39715e-160	163.999	159.62	0.514632	0.672	0.363
Nedd8	1.43791e-164	3.43833e-160	163.842	159.464	0.433172	0.979	0.701
Plcl1	2.49942e-164	5.97661e-160	163.602	159.224	-1.78967	0.824	0.806
Trappc4	3.79772e-164	9.08111e-160	163.42	159.042	0.405004	0.758	0.43
Tpp1	3.8788e-164	9.27499e-160	163.411	159.033	0.477438	0.952	0.622
Atp5h	4.34907e-164	1.03995e-159	163.362	158.983	0.436398	0.986	0.73
Mgat2	4.75956e-164	1.13811e-159	163.322	158.944	0.433653	0.751	0.417
Psma5	5.82425e-164	1.39269e-159	163.235	158.856	0.447898	0.871	0.523
Arf5	6.19069e-164	1.48032e-159	163.208	158.83	0.445186	0.943	0.61
Lat2	6.83124e-164	1.63349e-159	163.166	158.787	0.443097	0.894	0.554
Fcgr4	8.57754e-164	2.05106e-159	163.067	158.688	0.506905	0.656	0.35
Ms4a6c	1.20616e-163	2.88417e-159	162.919	158.54	0.49996	0.88	0.534
Lamtor3	1.24094e-163	2.96733e-159	162.906	158.528	0.397755	0.738	0.41
Rpl22l1	1.76736e-163	4.2261e-159	162.753	158.374	0.469025	0.977	0.698
Mettl1	2.05785e-163	4.92073e-159	162.687	158.308	0.586847	0.425	0.193
Ppp2r1a	2.57699e-163	6.16209e-159	162.589	158.21	0.453826	0.675	0.366
Eif3a	2.63224e-163	6.29422e-159	162.58	158.201	0.461524	0.962	0.664
Pop5	2.64263e-163	6.31905e-159	162.578	158.199	0.454971	0.684	0.37
Rpl28	2.75488e-163	6.58746e-159	162.56	158.181	0.386603	1	0.893
Anxa7	3.11729e-163	7.45407e-159	162.506	158.128	0.418794	0.643	0.345
Ubxn1	3.30877e-163	7.91193e-159	162.48	158.102	0.455584	0.943	0.611
C1qa	4.61508e-163	1.10356e-158	162.336	157.957	0.404773	1	0.967
Nfic	6.23592e-163	1.49113e-158	162.205	157.826	0.43179	0.867	0.517
Ndufab1	1.22027e-162	2.91791e-158	161.914	157.535	0.438196	0.923	0.585
Ero1a	1.33832e-162	3.20018e-158	161.873	157.495	0.638872	0.531	0.262
Ndufb10	1.44974e-162	3.46661e-158	161.839	157.46	0.434379	0.94	0.605
Sh3bp5	1.70302e-162	4.07226e-158	161.769	157.39	0.481913	0.542	0.274
Ndufb11	1.991e-162	4.76087e-158	161.701	157.322	0.465188	0.955	0.632
Dleu2	2.57865e-162	6.16608e-158	161.589	157.21	-1.50486	0.856	0.814
Spr	3.59586e-162	8.59843e-158	161.444	157.066	0.648252	0.496	0.243
Txnl1	4.10445e-162	9.81457e-158	161.387	157.008	0.4277	0.865	0.512
Psmg4	4.34809e-162	1.03972e-157	161.362	156.983	0.396049	0.781	0.439
Spcs3	4.93406e-162	1.17983e-157	161.307	156.928	0.365129	0.76	0.426
Entpd1	6.67367e-162	1.59581e-157	161.176	156.797	-1.56637	0.788	0.791
Dgkz	7.14204e-162	1.70781e-157	161.146	156.768	0.324381	0.892	0.557
Imp4	7.68209e-162	1.83694e-157	161.115	156.736	0.47053	0.604	0.318
Rps19bp1	1.11217e-161	2.65941e-157	160.954	156.575	0.473779	0.624	0.327
Fcrls	1.15849e-161	2.77018e-157	160.936	156.557	0.40653	0.998	0.914
Tmem258	1.98064e-161	4.7361e-157	160.703	156.325	0.443027	0.963	0.655
Srgn	2.13949e-161	5.11596e-157	160.67	156.291	0.25669	0.962	0.667
Eif4e2	2.22484e-161	5.32003e-157	160.653	156.274	0.387045	0.871	0.529
Rack1	2.71345e-161	6.4884e-157	160.566	156.188	0.412637	0.998	0.831
Ubl5	2.72469e-161	6.51529e-157	160.565	156.186	0.411681	0.988	0.734
Slc25a5	2.927e-161	6.99905e-157	160.534	156.155	0.459303	0.987	0.701
Qdpr	3.39179e-161	8.11046e-157	160.47	156.091	0.46694	0.65	0.342
Sri	4.51923e-161	1.08064e-156	160.345	155.966	0.419951	0.893	0.548
Vdac2	5.27168e-161	1.26056e-156	160.278	155.899	0.449639	0.978	0.689
Cct8	5.72627e-161	1.36926e-156	160.242	155.864	0.43297	0.904	0.565
Gga2	1.19881e-160	2.86659e-156	159.921	155.543	0.549978	0.473	0.226
Cln8	1.27975e-160	3.06014e-156	159.893	155.514	0.45202	0.618	0.325
Ola1	1.61087e-160	3.85191e-156	159.793	155.414	0.372972	0.828	0.481
Itga5	1.61327e-160	3.85765e-156	159.792	155.414	0.574401	0.412	0.185
Rad23a	2.10509e-160	5.0337e-156	159.677	155.298	0.446268	0.69	0.374
Hspe1	3.2406e-160	7.74893e-156	159.489	155.111	0.4306	0.986	0.714
Washc5	3.29671e-160	7.88308e-156	159.482	155.103	0.366222	0.621	0.328
Glrx3	3.38405e-160	8.09193e-156	159.471	155.092	0.403351	0.858	0.519
Shtn1	9.56301e-160	2.28671e-155	159.019	154.641	0.816994	0.407	0.185
Ndufa7	1.30205e-159	3.11346e-155	158.885	154.507	0.409412	0.97	0.68
Ebna1bp2	1.65258e-159	3.95164e-155	158.782	154.403	0.444384	0.638	0.342
Ormdl2	1.73858e-159	4.1573e-155	158.76	154.381	0.417295	0.741	0.406
Hyou1	2.30194e-159	5.5044e-155	158.638	154.259	0.459351	0.595	0.315
Gcnt2	3.10524e-159	7.42525e-155	158.508	154.129	0.258853	0.704	0.391
Rnh1	3.12396e-159	7.47002e-155	158.505	154.127	0.43322	0.887	0.554
Lxn	3.92942e-159	9.39602e-155	158.406	154.027	0.587814	0.511	0.252
Eea1	4.13797e-159	9.89472e-155	158.383	154.005	0.362402	0.852	0.522
Mak16	5.46146e-159	1.30595e-154	158.263	153.884	0.461312	0.592	0.31
Gm37168	7.64225e-159	1.82741e-154	158.117	153.738	0.45852	0.363	0.151
Arl2	8.36216e-159	1.99956e-154	158.078	153.699	0.520407	0.574	0.3
Slc8a1	8.43196e-159	2.01625e-154	158.074	153.695	-1.17245	0.973	0.911
Csmd3	8.92828e-159	2.13493e-154	158.049	153.671	-1.88416	0.777	0.79
Ran	9.01577e-159	2.15585e-154	158.045	153.666	0.467323	0.961	0.646
Pafah1b3	9.81387e-159	2.34669e-154	158.008	153.63	0.542357	0.54	0.273
Ciao2a	1.24462e-158	2.97614e-154	157.905	153.526	0.448653	0.891	0.534
Mrps7	1.32892e-158	3.17772e-154	157.877	153.498	0.447824	0.645	0.347
Polr2l	2.3614e-158	5.64657e-154	157.627	153.248	0.586095	0.491	0.241
Afp	2.70024e-158	6.45681e-154	157.569	153.19	0.95495	0.378	0.166
Cdk4	2.79212e-158	6.67653e-154	157.554	153.175	0.430069	0.765	0.421
Tes	3.00303e-158	7.18083e-154	157.522	153.144	0.373633	0.566	0.29
Rragc	4.11065e-158	9.82938e-154	157.386	153.007	0.359551	0.789	0.455
Ndufs3	4.16885e-158	9.96856e-154	157.38	153.001	0.406606	0.854	0.506
Sdc3	5.065e-158	1.21114e-153	157.295	152.917	0.44408	0.71	0.391
Isyna1	5.65765e-158	1.35286e-153	157.247	152.869	0.520192	0.509	0.252
Pdcd6	1.09316e-157	2.61397e-153	156.961	152.583	0.384971	0.758	0.431
Txnrd1	1.51578e-157	3.62454e-153	156.819	152.441	0.375302	0.743	0.413
Lamp1	1.67809e-157	4.01265e-153	156.775	152.397	0.421076	0.997	0.826
Rpl27	1.93528e-157	4.62763e-153	156.713	152.335	0.389744	0.999	0.851
Hadh	1.93622e-157	4.62988e-153	156.713	152.334	0.582791	0.541	0.277
Mrpl51	2.17174e-157	5.19307e-153	156.663	152.285	0.382771	0.858	0.506
Tomm7	2.41939e-157	5.78525e-153	156.616	152.238	0.406311	0.986	0.713
Mrpl27	2.56159e-157	6.12527e-153	156.591	152.213	0.414585	0.674	0.361
Slc3a2	2.96697e-157	7.09461e-153	156.528	152.149	0.460243	0.928	0.591
Ndufa10	3.18538e-157	7.61689e-153	156.497	152.118	0.384818	0.815	0.468
Grn	3.31015e-157	7.91523e-153	156.48	152.102	0.394016	0.998	0.874
2210016F16Rik	4.18984e-157	1.00187e-152	156.378	151.999	0.462616	0.641	0.346
Cyb5r3	4.4055e-157	1.05344e-152	156.356	151.977	0.526841	0.612	0.322
Iah1	5.56796e-157	1.33141e-152	156.254	151.876	0.391351	0.617	0.323
Gcsh	6.63638e-157	1.58689e-152	156.178	151.799	0.582139	0.515	0.257
Dynll1	7.973e-157	1.9065e-152	156.098	151.72	0.442378	0.969	0.691
1500011B03Rik	8.62534e-157	2.06249e-152	156.064	151.686	0.653652	0.446	0.21
Csnk2b	1.77617e-156	4.24717e-152	155.751	151.372	0.419864	0.816	0.473
Pnkd	1.98474e-156	4.74591e-152	155.702	151.324	0.368288	0.747	0.42
Fam174c	2.295e-156	5.48782e-152	155.639	151.261	0.636831	0.48	0.234
ENSMUSG00000121485	2.91144e-156	6.96184e-152	155.536	151.157	0.307396	0.673	0.368
Ncbp2	2.917e-156	6.97513e-152	155.535	151.156	0.422395	0.656	0.357
Prkar1a	3.65477e-156	8.73928e-152	155.437	151.059	0.438529	0.941	0.614
Atp5e	3.91584e-156	9.36356e-152	155.407	151.029	0.389212	0.997	0.81
Gtf2f1	4.00737e-156	9.58242e-152	155.397	151.019	0.462996	0.612	0.322
Cox20	4.52781e-156	1.08269e-151	155.344	150.965	0.416178	0.808	0.476
Litaf	4.63283e-156	1.1078e-151	155.334	150.956	0.349513	0.877	0.54
Hsbp1	5.36828e-156	1.28366e-151	155.27	150.892	0.436591	0.969	0.675
Rab32	5.88784e-156	1.4079e-151	155.23	150.851	0.399603	0.813	0.47
Rpl32	8.53881e-156	2.0418e-151	155.069	150.69	0.377169	1	0.928
Ccdc85b	8.97948e-156	2.14717e-151	155.047	150.668	0.509491	0.524	0.263
Nudcd2	1.15253e-155	2.75593e-151	154.938	150.56	0.413415	0.619	0.322
Rab34	1.26767e-155	3.03126e-151	154.897	150.518	0.882125	0.304	0.119
Mrpl15	1.33246e-155	3.18617e-151	154.875	150.497	0.324653	0.715	0.398
Adssl1	1.42218e-155	3.40071e-151	154.847	150.468	0.574527	0.504	0.25
Cox19	1.73249e-155	4.14273e-151	154.761	150.383	0.433013	0.569	0.297
Ufc1	1.82623e-155	4.36689e-151	154.738	150.36	0.409275	0.872	0.531
Pde3b	1.87351e-155	4.47994e-151	154.727	150.349	-1.28565	0.958	0.875
Cuta	2.03079e-155	4.85603e-151	154.692	150.314	0.446344	0.916	0.575
Bsg	2.23975e-155	5.35568e-151	154.65	150.271	0.450113	0.985	0.719
Cyb5r1	2.53383e-155	6.0589e-151	154.596	150.218	0.453784	0.463	0.222
Lsm7	2.69982e-155	6.45581e-151	154.569	150.19	0.412626	0.685	0.379
Arl11	2.83262e-155	6.77337e-151	154.548	150.169	0.41045	0.739	0.409
Arl3	3.13917e-155	7.50638e-151	154.503	150.125	0.35262	0.626	0.336
Ubfd1	3.71477e-155	8.88276e-151	154.43	150.051	0.412776	0.557	0.286
Cd52	3.8467e-155	9.19823e-151	154.415	150.036	0.405033	0.995	0.832
Ap3s1	3.99883e-155	9.562e-151	154.398	150.019	0.382505	0.832	0.499
Psenen	5.27071e-155	1.26033e-150	154.278	149.9	0.403622	0.965	0.649
Ssr1	5.53556e-155	1.32366e-150	154.257	149.878	0.428408	0.871	0.538
Scand1	5.89276e-155	1.40908e-150	154.23	149.851	0.436226	0.938	0.605
Txndc9	5.9789e-155	1.42967e-150	154.223	149.845	0.35358	0.739	0.415
Eif3b	6.10643e-155	1.46017e-150	154.214	149.836	0.396136	0.721	0.396
Phb	6.57591e-155	1.57243e-150	154.182	149.803	0.528932	0.489	0.237
Mrps18c	7.95543e-155	1.9023e-150	154.099	149.721	0.371535	0.84	0.49
Pdcl3	8.60825e-155	2.0584e-150	154.065	149.686	0.395636	0.727	0.409
Cct5	1.13142e-154	2.70546e-150	153.946	149.568	0.453564	0.894	0.549
Snrnp25	1.23617e-154	2.95594e-150	153.908	149.529	0.580792	0.522	0.263
Cdc34	1.32684e-154	3.17275e-150	153.877	149.499	0.46209	0.583	0.303
Rpl23	1.67716e-154	4.01043e-150	153.775	149.397	0.351626	1	0.94
Tbrg1	1.81356e-154	4.33658e-150	153.741	149.363	0.479507	0.52	0.261
Ghitm	2.81754e-154	6.73731e-150	153.55	149.172	0.381924	0.858	0.507
Pole4	3.67564e-154	8.78919e-150	153.435	149.056	0.423777	0.694	0.381
Ywhag	4.47556e-154	1.07019e-149	153.349	148.971	0.364212	0.792	0.463
Psmb2	6.51828e-154	1.55865e-149	153.186	148.807	0.440841	0.915	0.587
Pgd	7.54543e-154	1.80426e-149	153.122	148.744	0.385095	0.839	0.489
Gsto1	7.93991e-154	1.89859e-149	153.1	148.722	0.476186	0.676	0.367
Alas1	8.01792e-154	1.91724e-149	153.096	148.717	0.404702	0.638	0.347
Snx8	8.04349e-154	1.92336e-149	153.095	148.716	0.241778	0.581	0.3
Ranbp1	8.23934e-154	1.97019e-149	153.084	148.705	0.426945	0.919	0.573
Tomm22	1.12685e-153	2.69451e-149	152.948	148.57	0.422713	0.894	0.541
Gnptg	1.47005e-153	3.51519e-149	152.833	148.454	0.43198	0.64	0.345
Gm2000	1.7236e-153	4.12146e-149	152.764	148.385	0.379937	0.903	0.548
Med10	1.85216e-153	4.42889e-149	152.732	148.354	0.430834	0.618	0.326
Zfand5	1.86459e-153	4.45861e-149	152.729	148.351	0.363778	0.821	0.488
Mrto4	2.54231e-153	6.07916e-149	152.595	148.216	0.514418	0.557	0.286
Neat1	2.68638e-153	6.42368e-149	152.571	148.192	0.0861683	0.774	0.453
Psmd1	3.50116e-153	8.37197e-149	152.456	148.077	0.407093	0.845	0.509
Nus1	3.55738e-153	8.5064e-149	152.449	148.07	0.357651	0.64	0.345
Lap3	3.58871e-153	8.58132e-149	152.445	148.066	0.419825	0.911	0.564
Slc48a1	3.71547e-153	8.88444e-149	152.43	148.051	0.615238	0.59	0.316
Ctsc	3.72674e-153	8.91138e-149	152.429	148.05	0.473516	0.987	0.765
Mef2a	5.28784e-153	1.26443e-148	152.277	147.898	-1.02445	0.979	0.912
Rpl6	5.67236e-153	1.35637e-148	152.246	147.868	0.387117	1	0.873
Npm1	8.05342e-153	1.92573e-148	152.094	147.715	0.446636	0.995	0.757
Ddx18	8.88958e-153	2.12568e-148	152.051	147.673	0.344108	0.754	0.424
Stt3a	1.03059e-152	2.46435e-148	151.987	147.608	0.37812	0.751	0.428
Naa12	1.21704e-152	2.91018e-148	151.915	147.536	0.365878	0.735	0.412
Mvp	1.27578e-152	3.05065e-148	151.894	147.516	0.355058	0.539	0.272
Ptgr1	1.44105e-152	3.44585e-148	151.841	147.463	0.552732	0.524	0.265
Idh1	1.46493e-152	3.50294e-148	151.834	147.456	0.416306	0.629	0.339
Ppp1ca	1.47653e-152	3.53068e-148	151.831	147.452	0.460264	0.961	0.647
Smagp	1.64029e-152	3.92226e-148	151.785	147.406	0.432654	0.559	0.285
Rnasel	1.81481e-152	4.33958e-148	151.741	147.363	0.373088	0.563	0.292
Atp6v1b2	1.83209e-152	4.3809e-148	151.737	147.358	0.351555	0.871	0.533
Mrps34	1.91689e-152	4.58366e-148	151.717	147.339	0.431236	0.618	0.329
Smim26	2.1377e-152	5.11168e-148	151.67	147.291	0.389538	0.6	0.317
Lmna	2.14487e-152	5.1288e-148	151.669	147.29	0.932034	0.349	0.15
Borcs7	2.43872e-152	5.83146e-148	151.613	147.234	0.311701	0.639	0.343
Rnaseh2c	2.56297e-152	6.12857e-148	151.591	147.213	0.409846	0.877	0.527
Zcrb1	2.99357e-152	7.15822e-148	151.524	147.145	0.390273	0.869	0.529
Sh3pxd2b	3.39678e-152	8.12238e-148	151.469	147.09	0.787343	0.376	0.167
BC031181	3.43349e-152	8.21017e-148	151.464	147.086	0.395786	0.86	0.516
Ndufb4	5.91329e-152	1.41399e-147	151.228	146.85	0.379859	0.657	0.357
Micos10	7.01863e-152	1.6783e-147	151.154	146.775	0.395987	0.971	0.677
Slc39a14	7.54194e-152	1.80343e-147	151.123	146.744	0.376776	0.497	0.242
Polr2h	1.03748e-151	2.48081e-147	150.984	146.605	0.552076	0.482	0.236
Selenok	1.04226e-151	2.49225e-147	150.982	146.603	0.426698	0.955	0.652
Calu	1.53295e-151	3.66559e-147	150.814	146.436	0.337083	0.709	0.393
Cbr1	1.66769e-151	3.98778e-147	150.778	146.399	0.493499	0.52	0.261
Odc1	2.26509e-151	5.41628e-147	150.645	146.266	0.578005	0.493	0.245
Pin4	2.33053e-151	5.57277e-147	150.633	146.254	0.379414	0.751	0.428
Alg5	2.35922e-151	5.64137e-147	150.627	146.249	0.374859	0.738	0.421
Kdelr2	2.46095e-151	5.88463e-147	150.609	146.23	0.341841	0.763	0.431
Tmem251	3.21307e-151	7.6831e-147	150.493	146.114	0.735807	0.402	0.186
Eci2	4.02175e-151	9.61681e-147	150.396	146.017	0.310742	0.708	0.39
Atp5pb	4.32812e-151	1.03494e-146	150.364	145.985	0.433794	0.979	0.707
Anxa4	4.39087e-151	1.04995e-146	150.357	145.979	0.41048	0.605	0.319
Lman2	4.91373e-151	1.17497e-146	150.309	145.93	0.376542	0.842	0.502
Rabac1	5.42671e-151	1.29763e-146	150.265	145.887	0.412044	0.945	0.63
Ndufa3	5.69972e-151	1.36292e-146	150.244	145.866	0.402498	0.968	0.674
Ptrhd1	6.39325e-151	1.52875e-146	150.194	145.816	0.411966	0.656	0.358
Meis3	6.56603e-151	1.57007e-146	150.183	145.804	0.479583	0.385	0.17
Rsl1d1	7.47286e-151	1.78691e-146	150.127	145.748	0.38899	0.744	0.422
Drap1	9.33965e-151	2.2333e-146	150.03	145.651	0.393915	0.92	0.578
Dnlz	1.02674e-150	2.45515e-146	149.989	145.61	0.449205	0.595	0.319
Nras	1.39767e-150	3.34211e-146	149.855	145.476	0.329943	0.741	0.421
Apobec1	1.44581e-150	3.45723e-146	149.84	145.461	0.445558	0.872	0.564
Uqcrfs1	2.18116e-150	5.21558e-146	149.661	145.283	0.392299	0.816	0.469
Glo1	2.31325e-150	5.53145e-146	149.636	145.257	0.433074	0.609	0.323
Dstn	3.08925e-150	7.38702e-146	149.51	145.132	0.420667	0.942	0.622
Tkt	3.09306e-150	7.39613e-146	149.51	145.131	0.396195	0.854	0.511
Gng12	3.14517e-150	7.52072e-146	149.502	145.124	0.323919	0.911	0.585
Thyn1	3.23392e-150	7.73294e-146	149.49	145.112	0.53033	0.499	0.248
Atp5a1	3.39032e-150	8.10692e-146	149.47	145.091	0.44042	0.959	0.66
Ckb	4.82685e-150	1.1542e-145	149.316	144.938	0.476045	0.988	0.757
Selenoh	5.11376e-150	1.2228e-145	149.291	144.913	0.476037	0.847	0.503
Slamf9	7.16548e-150	1.71341e-145	149.145	144.766	0.538212	0.627	0.339
Folr2	1.01698e-149	2.43181e-145	148.993	144.614	1.01114	0.352	0.153
Gipc1	1.10326e-149	2.63811e-145	148.957	144.579	0.373899	0.61	0.322
Pigp	1.18721e-149	2.83886e-145	148.925	144.547	0.420492	0.592	0.312
Uhrf1bp1l	1.45517e-149	3.4796e-145	148.837	144.458	0.284187	0.515	0.26
Nip7	1.55309e-149	3.71374e-145	148.809	144.43	0.524907	0.512	0.26
C1d	1.56286e-149	3.7371e-145	148.806	144.427	0.3564	0.741	0.415
Pgls	1.61068e-149	3.85145e-145	148.793	144.414	0.430572	0.93	0.601
Denr	1.62586e-149	3.88775e-145	148.789	144.41	0.394341	0.894	0.549
Psmb7	2.19207e-149	5.24167e-145	148.659	144.281	0.371591	0.86	0.525
Polr1d	3.77376e-149	9.02381e-145	148.423	144.045	0.412913	0.939	0.604
Nifk	4.083e-149	9.76328e-145	148.389	144.01	0.461908	0.539	0.277
Vti1b	4.66159e-149	1.11468e-144	148.331	143.953	0.328942	0.786	0.459
Mrpl30	5.57819e-149	1.33386e-144	148.254	143.875	0.40231	0.853	0.51
Ehd4	6.1331e-149	1.46655e-144	148.212	143.834	0.370299	0.933	0.628
Mrps16	7.07025e-149	1.69064e-144	148.151	143.772	0.406089	0.78	0.454
Ech1	7.12655e-149	1.7041e-144	148.147	143.769	0.40093	0.745	0.426
Flot1	1.00914e-148	2.41306e-144	147.996	143.617	0.379621	0.595	0.315
Pip4k2a	1.07539e-148	2.57147e-144	147.968	143.59	-1.24219	0.926	0.85
Psmd4	1.21093e-148	2.89558e-144	147.917	143.538	0.362162	0.899	0.554
Ppa1	1.38271e-148	3.30634e-144	147.859	143.481	0.564171	0.514	0.261
Colgalt1	1.44934e-148	3.46567e-144	147.839	143.46	0.34528	0.796	0.459
Ppdpf	1.81297e-148	4.33519e-144	147.742	143.363	0.432764	0.619	0.337
Fmc1	2.08683e-148	4.99002e-144	147.681	143.302	0.443892	0.578	0.307
Cltb	2.2575e-148	5.39815e-144	147.646	143.268	0.381789	0.602	0.319
Mpdu1	2.58857e-148	6.18978e-144	147.587	143.208	0.340318	0.611	0.322
Mocs2	3.0585e-148	7.3135e-144	147.514	143.136	0.445864	0.604	0.322
Cyb561d2	4.31249e-148	1.0312e-143	147.365	142.987	0.600317	0.494	0.246
Cenpb	4.42359e-148	1.05777e-143	147.354	142.976	0.413254	0.71	0.39
Emg1	5.56071e-148	1.32968e-143	147.255	142.876	0.378241	0.775	0.441
Esd	5.68004e-148	1.35821e-143	147.246	142.867	0.434424	0.922	0.588
Cmtm3	6.00379e-148	1.43563e-143	147.222	142.843	0.327413	0.648	0.356
Dph3	7.33704e-148	1.75443e-143	147.134	142.756	0.35653	0.667	0.363
Btf3	7.66982e-148	1.83401e-143	147.115	142.737	0.426627	0.988	0.731
Commd3	9.64132e-148	2.30543e-143	147.016	142.637	0.365394	0.851	0.516
Selenof	1.24471e-147	2.97635e-143	146.905	142.526	0.425038	0.985	0.72
Pabpc4	1.4906e-147	3.56433e-143	146.827	142.448	0.269294	0.621	0.334
Churc1	2.77286e-147	6.63046e-143	146.557	142.178	0.425861	0.637	0.345
Scamp3	2.98819e-147	7.14535e-143	146.525	142.146	0.405206	0.628	0.337
Stoml2	3.32669e-147	7.95477e-143	146.478	142.099	0.460105	0.576	0.304
Mrpl14	3.36501e-147	8.0464e-143	146.473	142.094	0.38752	0.801	0.462
Tufm	3.47953e-147	8.32026e-143	146.458	142.08	0.598693	0.495	0.249
Ifi27	3.60018e-147	8.60875e-143	146.444	142.065	0.419079	0.79	0.474
Samm50	9.98316e-147	2.38717e-142	146.001	141.622	0.340288	0.713	0.4
Atp13a2	1.34774e-146	3.22272e-142	145.87	141.492	0.394464	0.741	0.423
Dnajc19	1.57526e-146	3.76677e-142	145.803	141.424	0.388043	0.866	0.525
Psma3	1.63361e-146	3.90629e-142	145.787	141.408	0.413498	0.942	0.633
Gm10076	1.79091e-146	4.28242e-142	145.747	141.368	0.423582	0.988	0.72
Hacd2	2.13883e-146	5.11436e-142	145.67	141.291	0.298251	0.772	0.446
Psmd13	2.16085e-146	5.16703e-142	145.665	141.287	0.352477	0.775	0.447
Gorasp2	2.47466e-146	5.91741e-142	145.606	141.228	0.302717	0.643	0.347
Gpr183	3.19959e-146	7.65086e-142	145.495	141.116	0.407453	0.812	0.485
Mcee	5.28576e-146	1.26393e-141	145.277	140.898	0.369849	0.681	0.379
Aldh9a1	5.64057e-146	1.34877e-141	145.249	140.87	0.453189	0.52	0.264
Oat	7.80189e-146	1.86559e-141	145.108	140.729	0.437508	0.561	0.292
Rbx1	8.0498e-146	1.92487e-141	145.094	140.716	0.402787	0.972	0.684
Acp1	8.34815e-146	1.99621e-141	145.078	140.7	0.400584	0.718	0.403
Bzw1	8.42031e-146	2.01346e-141	145.075	140.696	0.409133	0.919	0.593
Mrps23	1.05949e-145	2.53346e-141	144.975	140.596	0.429975	0.56	0.292
Ppp1r11	1.09203e-145	2.61125e-141	144.962	140.583	0.380948	0.784	0.458
Dhrs1	1.11256e-145	2.66035e-141	144.954	140.575	0.411171	0.592	0.316
Armcx3	1.23024e-145	2.94174e-141	144.91	140.531	0.439559	0.495	0.247
Eif3g	1.26117e-145	3.01571e-141	144.899	140.521	0.352938	0.747	0.431
Adamts1	1.89608e-145	4.53391e-141	144.722	140.344	1.73205	0.141	0.035
Ivns1abp	2.043e-145	4.88523e-141	144.69	140.311	-1.69306	0.788	0.768
Arl1	2.10304e-145	5.02879e-141	144.677	140.299	0.348738	0.82	0.489
Zbtb8os	2.19278e-145	5.24338e-141	144.659	140.28	0.360246	0.691	0.385
Ccl2	2.70601e-145	6.4706e-141	144.568	140.189	0.834015	0.571	0.31
Ndufa9	2.70867e-145	6.47697e-141	144.567	140.189	0.334666	0.798	0.469
Polr2g	3.97178e-145	9.49733e-141	144.401	140.022	0.327179	0.778	0.446
Hnrnpab	4.67735e-145	1.11845e-140	144.33	139.951	0.395458	0.913	0.557
Psma1	4.99909e-145	1.19538e-140	144.301	139.922	0.407011	0.93	0.605
Arf4	6.38103e-145	1.52583e-140	144.195	139.816	0.350898	0.904	0.559
Mtx1	7.43757e-145	1.77847e-140	144.129	139.75	0.406188	0.547	0.284
Skic8	8.47965e-145	2.02765e-140	144.072	139.693	0.320516	0.642	0.348
Snx4	8.9734e-145	2.14572e-140	144.047	139.668	0.276109	0.714	0.404
Zmpste24	9.00265e-145	2.15271e-140	144.046	139.667	0.35133	0.702	0.395
Emc8	9.83836e-145	2.35255e-140	144.007	139.628	0.325347	0.684	0.376
Cyrib	1.05018e-144	2.5112e-140	143.979	139.6	-0.782836	0.988	0.908
Sfxn1	1.10487e-144	2.64198e-140	143.957	139.578	0.354369	0.547	0.286
Trappc1	1.48251e-144	3.54499e-140	143.829	139.45	0.368337	0.771	0.45
Abhd17a	1.64816e-144	3.94107e-140	143.783	139.404	0.392171	0.699	0.392
Rps18	1.88038e-144	4.49637e-140	143.726	139.347	0.374458	1	0.895
Siva1	2.34397e-144	5.60491e-140	143.63	139.251	0.449108	0.632	0.343
Pfdn6	2.82711e-144	6.76018e-140	143.549	139.17	0.364221	0.73	0.416
Sec24d	3.00509e-144	7.18576e-140	143.522	139.144	0.31319	0.439	0.209
Mtch2	5.74919e-144	1.37475e-139	143.24	138.862	0.321781	0.752	0.428
Cyp20a1	6.84485e-144	1.63674e-139	143.165	138.786	0.410074	0.53	0.271
Med8	8.16703e-144	1.9529e-139	143.088	138.709	0.313376	0.722	0.404
Rpl11	9.62237e-144	2.3009e-139	143.017	138.638	0.354692	0.999	0.895
Plekhh2	1.03112e-143	2.46562e-139	142.987	138.608	0.505188	0.33	0.138
Wdr18	1.22517e-143	2.92963e-139	142.912	138.533	0.573123	0.485	0.244
Slc39a7	1.25922e-143	3.01105e-139	142.9	138.521	0.316452	0.599	0.322
Ndufb1	1.37901e-143	3.2975e-139	142.86	138.482	0.388764	0.981	0.723
Fam104a	1.60166e-143	3.82989e-139	142.795	138.417	0.347073	0.78	0.449
Polr2j	2.20672e-143	5.27671e-139	142.656	138.278	0.342553	0.839	0.495
Vamp3	2.45555e-143	5.87172e-139	142.61	138.231	0.374382	0.722	0.405
Aga	2.92408e-143	6.99207e-139	142.534	138.155	0.3446	0.67	0.373
Snapc1	3.27919e-143	7.84119e-139	142.484	138.106	0.47095	0.515	0.264
Prxl2b	3.31093e-143	7.9171e-139	142.48	138.101	0.424676	0.652	0.357
Mrpl13	3.70658e-143	8.86317e-139	142.431	138.052	0.377797	0.679	0.377
Cct7	3.98118e-143	9.51979e-139	142.4	138.021	0.391733	0.848	0.508
Nol12	3.98371e-143	9.52584e-139	142.4	138.021	0.419598	0.539	0.277
Degs1	4.16647e-143	9.96285e-139	142.38	138.002	0.411339	0.619	0.336
Cetn2	7.16207e-143	1.71259e-138	142.145	137.766	0.352316	0.712	0.403
Atp6v1e1	7.16611e-143	1.71356e-138	142.145	137.766	0.353862	0.926	0.601
Polr2c	7.82235e-143	1.87048e-138	142.107	137.728	0.402678	0.631	0.342
Prps2	1.16486e-142	2.78542e-138	141.934	137.555	0.424586	0.609	0.332
Cdk8	1.4477e-142	3.46174e-138	141.839	137.461	-0.984312	0.993	0.957
Tspan3	1.55504e-142	3.7184e-138	141.808	137.43	0.382936	0.789	0.459
Lonrf3	2.38591e-142	5.7052e-138	141.622	137.244	0.247311	0.547	0.284
Acads	2.979e-142	7.12338e-138	141.526	137.147	0.330484	0.664	0.366
Ak3	3.38356e-142	8.09076e-138	141.471	137.092	0.507486	0.43	0.206
Antkmt	4.35814e-142	1.04212e-137	141.361	136.982	0.377585	0.853	0.514
Ssr3	4.61078e-142	1.10253e-137	141.336	136.958	0.381094	0.869	0.536
Necap2	5.37398e-142	1.28503e-137	141.27	136.891	0.386124	0.885	0.541
Nradd	6.19356e-142	1.48101e-137	141.208	136.829	0.923099	0.293	0.118
Fis1	8.09617e-142	1.93596e-137	141.092	136.713	0.402912	0.947	0.623
Dhrs7	8.58791e-142	2.05354e-137	141.066	136.687	0.302941	0.729	0.411
Abcf1	1.06669e-141	2.55066e-137	140.972	136.593	0.348667	0.88	0.532
Snrpa1	1.47568e-141	3.52865e-137	140.831	136.452	0.405753	0.672	0.372
Pa2g4	1.60365e-141	3.83465e-137	140.795	136.416	0.411416	0.741	0.423
Plekho2	1.70351e-141	4.07344e-137	140.769	136.39	0.378064	0.517	0.267
Rpl29	2.73109e-141	6.53057e-137	140.564	136.185	0.396992	0.997	0.808
Vav3	3.14395e-141	7.5178e-137	140.503	136.124	0.139931	0.481	0.236
Mrpl18	3.86789e-141	9.24891e-137	140.413	136.034	0.353988	0.834	0.484
Psmb1	4.57452e-141	1.09386e-136	140.34	135.961	0.40846	0.96	0.662
Gm56862	4.71411e-141	1.12724e-136	140.327	135.948	0.446003	0.601	0.325
Aldh7a1	4.85535e-141	1.16101e-136	140.314	135.935	0.451476	0.408	0.192
Psme2	5.04834e-141	1.20716e-136	140.297	135.918	0.384633	0.916	0.575
Ak6	5.1376e-141	1.2285e-136	140.289	135.911	0.35577	0.638	0.343
Uqcrc2	5.80207e-141	1.38739e-136	140.236	135.858	0.337593	0.81	0.48
Rrp7a	5.88858e-141	1.40808e-136	140.23	135.851	0.491826	0.485	0.245
Kdelr1	7.74779e-141	1.85265e-136	140.111	135.732	0.33844	0.8	0.468
Hmbs	9.31411e-141	2.22719e-136	140.031	135.652	0.547434	0.504	0.256
Tars	1.02944e-140	2.46159e-136	139.987	135.609	0.485029	0.586	0.317
Xylt1	1.07905e-140	2.58021e-136	139.967	135.588	0.358489	0.485	0.245
Bnip3	1.5632e-140	3.73791e-136	139.806	135.427	0.613582	0.53	0.278
Lage3	1.5941e-140	3.81181e-136	139.797	135.419	0.38722	0.673	0.376
Snu13	1.90943e-140	4.56584e-136	139.719	135.34	0.357892	0.852	0.505
Psmc2	2.03756e-140	4.87221e-136	139.691	135.312	0.34379	0.834	0.495
Timm23	2.79678e-140	6.68766e-136	139.553	135.175	0.355344	0.827	0.5
Fyn	3.85398e-140	9.21564e-136	139.414	135.035	0.180361	0.503	0.254
Fbl	4.88531e-140	1.16817e-135	139.311	134.932	0.306755	0.714	0.403
Nap1l1	5.93934e-140	1.42021e-135	139.226	134.848	0.378437	0.928	0.575
Eif3l	6.03447e-140	1.44296e-135	139.219	134.841	0.316829	0.724	0.403
Rhoa	6.20368e-140	1.48342e-135	139.207	134.829	0.369015	0.994	0.773
Rtcb	6.37896e-140	1.52534e-135	139.195	134.817	0.370773	0.873	0.526
Aamp	6.77974e-140	1.62117e-135	139.169	134.79	0.330393	0.822	0.486
Borcs8	9.41465e-140	2.25123e-135	139.026	134.648	0.429365	0.494	0.249
Cnih1	1.05598e-139	2.52506e-135	138.976	134.598	0.397928	0.673	0.375
Bud31	1.12946e-139	2.70076e-135	138.947	134.569	0.392785	0.695	0.396
Dhx32	1.1884e-139	2.84171e-135	138.925	134.546	0.314985	0.466	0.23
Ndufaf3	1.44252e-139	3.44934e-135	138.841	134.462	0.41874	0.58	0.312
Gemin7	1.65085e-139	3.94751e-135	138.782	134.404	0.33073	0.647	0.353
Rps10	2.08099e-139	4.97607e-135	138.682	134.303	0.352603	1	0.904
Mrps33	2.76585e-139	6.6137e-135	138.558	134.18	0.350789	0.921	0.578
Banf1	4.62928e-139	1.10695e-134	138.334	133.956	0.367128	0.835	0.493
Coa5	5.22038e-139	1.2483e-134	138.282	133.904	0.387549	0.63	0.348
Exosc4	7.04904e-139	1.68557e-134	138.152	133.773	0.466358	0.558	0.299
Nop16	1.31634e-138	3.14763e-134	137.881	133.502	0.555581	0.443	0.216
Dohh	1.45878e-138	3.48823e-134	137.836	133.457	0.545924	0.504	0.26
Il11ra1	1.71516e-138	4.10128e-134	137.766	133.387	0.499227	0.509	0.261
Spsb2	2.06001e-138	4.9259e-134	137.686	133.308	0.505422	0.468	0.233
Tyrobp	3.85159e-138	9.20992e-134	137.414	133.036	0.342322	1	0.956
Dnajc15	4.26913e-138	1.02083e-133	137.37	132.991	0.330131	0.804	0.472
Mbd3	4.73222e-138	1.13157e-133	137.325	132.946	0.359381	0.772	0.448
Creb3l1	4.8742e-138	1.16552e-133	137.312	132.933	1.18297	0.238	0.087
Slc23a2	5.41435e-138	1.29468e-133	137.266	132.888	0.212714	0.738	0.434
Marchf3	5.94485e-138	1.42153e-133	137.226	132.847	0.587468	0.337	0.146
Ninj1	6.83162e-138	1.63358e-133	137.165	132.787	0.380619	0.72	0.412
Eef1e1	7.96196e-138	1.90386e-133	137.099	132.72	0.611467	0.466	0.236
Tmem223	1.81374e-137	4.33702e-133	136.741	132.363	0.385567	0.659	0.367
Pfkl	2.01112e-137	4.80899e-133	136.697	132.318	0.404587	0.621	0.343
Rab1b	2.20427e-137	5.27085e-133	136.657	132.278	0.363571	0.66	0.365
Mrps25	2.28693e-137	5.46851e-133	136.641	132.262	0.368991	0.634	0.346
Rnf7	2.34567e-137	5.60896e-133	136.63	132.251	0.390737	0.932	0.587
Gm10790	3.24828e-137	7.76729e-133	136.488	132.11	-2.16109	0.554	0.644
Tmem14c	3.6331e-137	8.68748e-133	136.44	132.061	0.428863	0.958	0.647
Bet1	3.74993e-137	8.96683e-133	136.426	132.047	0.296957	0.659	0.366
Srp72	3.98484e-137	9.52855e-133	136.4	132.021	0.262163	0.784	0.455
Vps28	4.12707e-137	9.86866e-133	136.384	132.006	0.351349	0.864	0.525
Csf2ra	4.23279e-137	1.01215e-132	136.373	131.995	0.308923	0.83	0.505
Sdhd	6.25447e-137	1.49557e-132	136.204	131.825	0.34551	0.752	0.427
Naglu	6.45987e-137	1.54468e-132	136.19	131.811	0.331665	0.788	0.455
Med28	7.05627e-137	1.68729e-132	136.151	131.773	0.352466	0.853	0.508
Atp6ap2	7.3537e-137	1.75842e-132	136.133	131.755	0.33218	0.931	0.613
Ddx1	1.2178e-136	2.912e-132	135.914	131.536	0.327133	0.671	0.373
Uxt	1.25269e-136	2.99544e-132	135.902	131.524	0.526919	0.438	0.214
Ccdc115	1.27787e-136	3.05565e-132	135.894	131.515	0.384767	0.603	0.327
Commd6	1.42701e-136	3.41226e-132	135.846	131.467	0.294055	0.736	0.422
Nabp2	1.52796e-136	3.65367e-132	135.816	131.437	0.382265	0.572	0.308
Usp14	1.83443e-136	4.38648e-132	135.736	131.358	0.302368	0.805	0.47
Cebpa	1.87846e-136	4.49178e-132	135.726	131.348	0.297138	0.744	0.433
Hspa4	2.18888e-136	5.23405e-132	135.66	131.281	0.394621	0.926	0.604
Rps16	2.58542e-136	6.18225e-132	135.587	131.209	0.354604	1	0.903
Tpt1	3.4537e-136	8.25849e-132	135.462	131.083	0.32799	1	0.958
Cox14	3.45592e-136	8.26381e-132	135.461	131.083	0.338841	0.856	0.517
Gm11808	3.9123e-136	9.35509e-132	135.408	131.029	0.3631	0.704	0.398
Itsn1	3.95467e-136	9.4564e-132	135.403	131.024	0.460883	0.437	0.213
Commd5	4.45542e-136	1.06538e-131	135.351	130.972	0.566458	0.422	0.203
Rab11a	4.81484e-136	1.15133e-131	135.317	130.939	0.356751	0.897	0.584
Adam15	5.22776e-136	1.25006e-131	135.282	130.903	0.330366	0.881	0.554
Rab5c	8.98423e-136	2.14831e-131	135.047	130.668	0.392105	0.926	0.616
Rpl4	9.4039e-136	2.24866e-131	135.027	130.648	0.418663	0.995	0.746
Nln	1.06181e-135	2.53899e-131	134.974	130.595	0.199919	0.558	0.296
Ier3ip1	1.10701e-135	2.64707e-131	134.956	130.577	0.338354	0.935	0.611
Colec12	1.16529e-135	2.78644e-131	134.934	130.555	2.0944	0.143	0.038
Tor2a	1.26416e-135	3.02286e-131	134.898	130.52	0.416768	0.623	0.344
Polr2e	1.29272e-135	3.09114e-131	134.888	130.51	0.359238	0.801	0.473
Ndufs2	1.49464e-135	3.57398e-131	134.825	130.447	0.347422	0.816	0.487
Hadha	1.61008e-135	3.85002e-131	134.793	130.415	0.358676	0.894	0.564
Wsb2	1.69954e-135	4.06395e-131	134.77	130.391	0.301918	0.511	0.263
Sod1	1.69988e-135	4.06476e-131	134.77	130.391	0.346163	0.856	0.52
Crip1	1.93028e-135	4.6157e-131	134.714	130.336	0.191044	0.704	0.394
Camk1	2.00798e-135	4.80148e-131	134.697	130.319	0.370429	0.972	0.726
Slc39a1	2.21618e-135	5.29932e-131	134.654	130.276	0.354848	0.554	0.294
Cdc37	2.3052e-135	5.51219e-131	134.637	130.259	0.358524	0.901	0.554
Zcchc17	3.62821e-135	8.67577e-131	134.44	130.062	0.312558	0.731	0.416
Dnase2a	3.9085e-135	9.34601e-131	134.408	130.029	0.269924	0.868	0.528
Ywhab	5.06295e-135	1.21065e-130	134.296	129.917	0.416361	0.961	0.655
Snf8	5.37268e-135	1.28471e-130	134.27	129.891	0.320255	0.834	0.508
Serpine1	6.19473e-135	1.48128e-130	134.208	129.829	1.41174	0.165	0.048
Gabarapl1	1.90639e-134	4.55855e-130	133.72	129.341	0.556356	0.406	0.195
Rusc2	1.99875e-134	4.77941e-130	133.699	129.321	0.497605	0.334	0.146
Flii	2.37055e-134	5.66846e-130	133.625	129.247	0.268325	0.712	0.402
Vps35	2.40542e-134	5.75183e-130	133.619	129.24	0.37661	0.934	0.606
Tfg	3.10551e-134	7.42589e-130	133.508	129.129	0.231157	0.677	0.381
Lyn	3.71093e-134	8.87357e-130	133.431	129.052	-0.701074	0.988	0.926
Prdx5	4.01119e-134	9.59155e-130	133.397	129.018	0.40478	0.975	0.691
Dtnbp1	4.43649e-134	1.06085e-129	133.353	128.974	0.309444	0.911	0.594
Alkbh2	4.74911e-134	1.13561e-129	133.323	128.945	0.769412	0.33	0.145
Abracl	5.81995e-134	1.39167e-129	133.235	128.856	0.34963	0.93	0.594
Ift22	6.34354e-134	1.51687e-129	133.198	128.819	0.517396	0.473	0.242
Aco2	6.64832e-134	1.58975e-129	133.177	128.799	0.290145	0.77	0.445
Derl1	6.83212e-134	1.6337e-129	133.165	128.787	0.323838	0.875	0.537
Trappc6a	7.03304e-134	1.68174e-129	133.153	128.774	0.41361	0.599	0.329
Bud23	7.80332e-134	1.86593e-129	133.108	128.729	0.329011	0.547	0.29
Tecr	8.57288e-134	2.04995e-129	133.067	128.688	0.36687	0.885	0.551
Fkbp8	8.73015e-134	2.08755e-129	133.059	128.68	0.330565	0.775	0.449
Hmgn1	8.83846e-134	2.11345e-129	133.054	128.675	0.396976	0.943	0.608
Smn1	1.081e-133	2.5849e-129	132.966	128.588	0.423405	0.532	0.28
Psmc3	1.18808e-133	2.84094e-129	132.925	128.547	0.375168	0.909	0.583
Polr2k	1.26877e-133	3.03387e-129	132.897	128.518	0.254563	0.821	0.488
Gm5617	1.35207e-133	3.23308e-129	132.869	128.49	0.358724	0.609	0.334
Gatad1	1.51632e-133	3.62583e-129	132.819	128.441	0.351664	0.65	0.361
Tmem192	1.6096e-133	3.84888e-129	132.793	128.415	0.386529	0.511	0.265
Pes1	1.65789e-133	3.96435e-129	132.78	128.402	0.385436	0.562	0.301
Apex1	1.72282e-133	4.1196e-129	132.764	128.385	0.410657	0.631	0.347
Use1	2.61862e-133	6.26165e-129	132.582	128.203	0.340606	0.879	0.539
Phax	2.69111e-133	6.43499e-129	132.57	128.191	0.333158	0.653	0.364
Ly9	2.90058e-133	6.93586e-129	132.538	128.159	0.512745	0.553	0.301
Hax1	3.0454e-133	7.28216e-129	132.516	128.138	0.428283	0.503	0.261
Csf3r	3.10875e-133	7.43365e-129	132.507	128.129	-1.47242	0.859	0.813
Slc25a1	3.64552e-133	8.71716e-129	132.438	128.06	0.556837	0.461	0.233
Actr10	4.19574e-133	1.00329e-128	132.377	127.999	0.24302	0.697	0.388
Chchd10	5.06138e-133	1.21028e-128	132.296	127.917	0.598324	0.381	0.177
Mrpl16	5.22424e-133	1.24922e-128	132.282	127.903	0.439636	0.528	0.279
Rplp0	6.0954e-133	1.45753e-128	132.215	127.836	0.372506	0.999	0.881
Faim	6.67107e-133	1.59519e-128	132.176	127.797	0.292853	0.624	0.344
Ssbp4	7.49708e-133	1.7927e-128	132.125	127.746	0.297533	0.833	0.493
Tmem37	1.09771e-132	2.62484e-128	131.96	127.581	0.396454	0.798	0.476
Spp1	1.12152e-132	2.68179e-128	131.95	127.572	1.52303	0.993	0.952
Zmat2	1.28465e-132	3.07185e-128	131.891	127.513	0.347411	0.875	0.528
Metap2	1.47668e-132	3.53104e-128	131.831	127.452	0.391833	0.938	0.603
H13	2.05666e-132	4.91789e-128	131.687	127.308	0.241042	0.728	0.419
Zfp593	3.35326e-132	8.01832e-128	131.475	127.096	0.660846	0.389	0.185
Rpl7a	4.0304e-132	9.63749e-128	131.395	127.016	0.376227	0.999	0.82
Noc2l	4.21518e-132	1.00793e-127	131.375	126.997	0.307572	0.579	0.314
Agpat3	4.51998e-132	1.08082e-127	131.345	126.966	0.214632	0.77	0.446
Psmd3	7.10181e-132	1.69819e-127	131.149	126.77	0.303412	0.581	0.312
Yeats4	7.33472e-132	1.75388e-127	131.135	126.756	0.319478	0.723	0.41
Prelid3b	7.55295e-132	1.80606e-127	131.122	126.743	0.331454	0.584	0.314
Lasp1	8.47209e-132	2.02585e-127	131.072	126.693	0.210728	0.801	0.468
Cyb5a	8.80128e-132	2.10456e-127	131.055	126.677	0.387999	0.919	0.596
Nudt2	1.0759e-131	2.57268e-127	130.968	126.59	0.555806	0.451	0.227
Selplg	1.22818e-131	2.93683e-127	130.911	126.532	-0.941727	0.953	0.843
Aopep	1.2473e-131	2.98254e-127	130.904	126.525	0.100252	0.826	0.512
Dock8	1.28488e-131	3.07241e-127	130.891	126.513	-1.13312	0.952	0.864
Commd2	1.55672e-131	3.72242e-127	130.808	126.429	0.329811	0.601	0.33
Rab8a	1.72384e-131	4.12205e-127	130.764	126.385	0.315467	0.741	0.429
Ndufv2	1.87662e-131	4.48738e-127	130.727	126.348	0.336272	0.871	0.538
Bcas2	2.34548e-131	5.6085e-127	130.63	126.251	0.312046	0.827	0.493
Esyt1	2.97493e-131	7.11365e-127	130.527	126.148	0.381365	0.584	0.31
Snrpa	3.34354e-131	7.99507e-127	130.476	126.097	0.300033	0.661	0.372
Utp11	3.47232e-131	8.30302e-127	130.459	126.081	0.28776	0.746	0.432
Pgm1	3.56794e-131	8.53166e-127	130.448	126.069	0.303537	0.482	0.247
Impdh1	3.71099e-131	8.87373e-127	130.431	126.052	1.3188	0.179	0.056
Prdx3	4.2868e-131	1.02506e-126	130.368	125.989	0.381515	0.587	0.322
Pak1ip1	4.29262e-131	1.02645e-126	130.367	125.989	0.364811	0.647	0.363
Hdgf	4.82e-131	1.15256e-126	130.317	125.938	0.345512	0.781	0.45
Npm3	5.8371e-131	1.39577e-126	130.234	125.855	0.454225	0.599	0.326
Pla2g12a	7.05535e-131	1.68708e-126	130.151	125.773	0.720346	0.351	0.16
Sumo3	7.51737e-131	1.79755e-126	130.124	125.745	0.280366	0.723	0.415
Dhrs3	9.1442e-131	2.18656e-126	130.039	125.66	0.344922	0.885	0.563
Rps5	9.55371e-131	2.28448e-126	130.02	125.641	0.370278	0.999	0.861
Mrpl52	1.03006e-130	2.46308e-126	129.987	125.609	0.366383	0.982	0.71
Mcub	1.12521e-130	2.69061e-126	129.949	125.57	0.643	0.376	0.176
Tesk1	1.12838e-130	2.69819e-126	129.948	125.569	0.390308	0.518	0.273
Tlr13	1.21139e-130	2.89667e-126	129.917	125.538	0.232437	0.676	0.385
Epb41l2	1.35728e-130	3.24552e-126	129.867	125.489	-0.809048	0.994	0.931
Tomm40	1.41744e-130	3.38939e-126	129.848	125.47	0.301045	0.615	0.339
Rpl10a	1.75152e-130	4.18824e-126	129.757	125.378	0.35599	1	0.866
Acot9	1.7993e-130	4.30249e-126	129.745	125.366	0.386071	0.463	0.235
Dpy30	1.85544e-130	4.43673e-126	129.732	125.353	0.288502	0.751	0.43
Hmox1	1.91359e-130	4.57577e-126	129.718	125.34	1.39029	0.899	0.64
Tm9sf3	1.9586e-130	4.68341e-126	129.708	125.329	0.391729	0.973	0.707
Chmp4b	2.09218e-130	5.00282e-126	129.679	125.301	0.346521	0.939	0.62
Sys1	2.15514e-130	5.15337e-126	129.667	125.288	0.368012	0.827	0.493
Pam16	2.45308e-130	5.86579e-126	129.61	125.232	0.329584	0.635	0.354
Man2a1	2.73975e-130	6.55128e-126	129.562	125.184	0.252335	0.789	0.474
Eif1b	4.83192e-130	1.15541e-125	129.316	124.937	0.326343	0.875	0.538
Entpd7	5.31918e-130	1.27192e-125	129.274	124.896	0.419045	0.417	0.203
Arl8b	6.07312e-130	1.4522e-125	129.217	124.838	0.334504	0.903	0.58
Uqcc3	6.17717e-130	1.47708e-125	129.209	124.831	0.326188	0.696	0.398
Nfu1	7.01928e-130	1.67845e-125	129.154	124.775	0.266786	0.709	0.406
Pigt	7.63355e-130	1.82533e-125	129.117	124.739	0.357336	0.634	0.353
Idh3b	8.54187e-130	2.04253e-125	129.068	124.69	0.280808	0.671	0.379
Prmt1	1.07849e-129	2.57889e-125	128.967	124.589	0.354775	0.674	0.38
Tmem141	1.0834e-129	2.59064e-125	128.965	124.587	0.3564	0.619	0.347
Strap	1.14134e-129	2.72918e-125	128.943	124.564	0.32338	0.659	0.367
Ppt1	1.31296e-129	3.13955e-125	128.882	124.503	0.352828	0.963	0.678
Dapk3	2.10007e-129	5.02169e-125	128.678	124.299	0.433229	0.467	0.238
Trappc3	2.4915e-129	5.95766e-125	128.604	124.225	0.274183	0.733	0.422
Pole3	2.92454e-129	6.99317e-125	128.534	124.155	0.423988	0.543	0.289
Mphosph10	3.87464e-129	9.26505e-125	128.412	124.033	0.371238	0.584	0.315
Bak1	5.1744e-129	1.2373e-124	128.286	123.908	0.403531	0.527	0.279
Rpl18	5.58919e-129	1.33649e-124	128.253	123.874	0.353854	1	0.866
Plekhb2	5.97106e-129	1.4278e-124	128.224	123.845	0.263169	0.542	0.288
Maml3	6.51113e-129	1.55694e-124	128.186	123.808	-1.59549	0.9	0.829
Mrpl33	7.23002e-129	1.72884e-124	128.141	123.762	0.342104	0.923	0.603
Snrpd3	8.95651e-129	2.14168e-124	128.048	123.669	0.316725	0.858	0.524
Celf2	9.19035e-129	2.1976e-124	128.037	123.658	-1.08796	0.942	0.84
Gab3	9.48338e-129	2.26767e-124	128.023	123.644	0.177218	0.462	0.232
Rpl9	9.58999e-129	2.29316e-124	128.018	123.64	0.357417	1	0.862
Pigbos1	1.02468e-128	2.45022e-124	127.989	123.611	0.267068	0.668	0.38
Cops5	1.07003e-128	2.55866e-124	127.971	123.592	0.257382	0.741	0.432
Bloc1s1	1.12496e-128	2.69001e-124	127.949	123.57	0.359432	0.551	0.294
Dpp3	1.15622e-128	2.76476e-124	127.937	123.558	0.334572	0.481	0.249
Arfgap3	1.20834e-128	2.88939e-124	127.918	123.539	0.468336	0.399	0.192
Jagn1	1.29856e-128	3.10512e-124	127.887	123.508	0.361679	0.509	0.267
Chmp2b	1.4121e-128	3.37661e-124	127.85	123.472	0.351986	0.585	0.322
Nrap	1.49267e-128	3.56927e-124	127.826	123.447	1.29773	0.18	0.057
Pdzd11	1.59694e-128	3.8186e-124	127.797	123.418	0.35828	0.558	0.3
Gch1	1.62635e-128	3.88893e-124	127.789	123.41	0.616751	0.342	0.154
Rcn2	1.65885e-128	3.96665e-124	127.78	123.402	0.271563	0.595	0.324
Mrpl40	2.15358e-128	5.14965e-124	127.667	123.288	0.410139	0.552	0.297
Mrpl38	2.45713e-128	5.87549e-124	127.61	123.231	0.479744	0.423	0.207
Dap3	2.80237e-128	6.70102e-124	127.552	123.174	0.222032	0.581	0.313
Mrpl43	2.91752e-128	6.97638e-124	127.535	123.156	0.326217	0.804	0.481
Mrps28	2.9261e-128	6.99689e-124	127.534	123.155	0.152389	0.74	0.433
Bola1	3.20321e-128	7.65951e-124	127.494	123.116	0.350866	0.554	0.299
Bcat2	3.95335e-128	9.45325e-124	127.403	123.024	0.360097	0.458	0.232
Idh3a	4.08212e-128	9.76117e-124	127.389	123.01	0.461956	0.483	0.251
Gtf3c4	5.33798e-128	1.27642e-123	127.273	122.894	0.491675	0.358	0.165
Timm17b	5.88546e-128	1.40733e-123	127.23	122.852	0.300135	0.631	0.349
Mlx	6.13407e-128	1.46678e-123	127.212	122.834	0.487708	0.467	0.239
Utp18	6.63775e-128	1.58722e-123	127.178	122.799	0.372712	0.525	0.278
Nab2	7.71977e-128	1.84595e-123	127.112	122.734	0.787179	0.315	0.139
Cap1	8.69674e-128	2.07957e-123	127.061	122.682	0.315129	0.951	0.656
2810004N23Rik	9.7762e-128	2.33769e-123	127.01	122.631	0.149977	0.646	0.363
Rps6	1.06843e-127	2.55483e-123	126.971	122.593	0.368079	0.998	0.833
Dera	1.39045e-127	3.32485e-123	126.857	122.478	0.237869	0.546	0.292
Carhsp1	1.52392e-127	3.64399e-123	126.817	122.438	0.544724	0.437	0.219
Mrpl23	1.63304e-127	3.90494e-123	126.787	122.408	0.326545	0.88	0.54
Plau	1.65315e-127	3.95301e-123	126.782	122.403	1.03629	0.3	0.13
Mbnl1	1.68612e-127	4.03184e-123	126.773	122.394	-0.917918	0.986	0.903
Slc2a6	1.78319e-127	4.26397e-123	126.749	122.37	0.677703	0.367	0.173
Ipo5	2.11571e-127	5.05909e-123	126.675	122.296	0.292924	0.673	0.378
Gtf3a	2.45387e-127	5.86769e-123	126.61	122.232	0.335527	0.609	0.337
Phgdh	2.72216e-127	6.50924e-123	126.565	122.186	0.390927	0.844	0.521
Mphosph6	3.27979e-127	7.84264e-123	126.484	122.106	0.432037	0.447	0.226
Pofut2	4.20063e-127	1.00446e-122	126.377	121.998	0.462922	0.435	0.218
1110038B12Rik	5.24292e-127	1.25369e-122	126.28	121.902	0.415802	0.616	0.344
Impa1	5.90519e-127	1.41205e-122	126.229	121.85	0.286112	0.636	0.358
Pum3	6.24806e-127	1.49404e-122	126.204	121.826	0.27032	0.58	0.315
Cd83	6.89406e-127	1.64851e-122	126.162	121.783	0.633588	0.549	0.303
Dpm2	8.20222e-127	1.96131e-122	126.086	121.707	0.274439	0.595	0.326
Pcna	8.89603e-127	2.12722e-122	126.051	121.672	0.193307	0.808	0.475
Gps1	9.1042e-127	2.177e-122	126.041	121.662	0.350744	0.595	0.325
Vkorc1	1.07882e-126	2.57969e-122	125.967	121.588	0.310357	0.84	0.507
Nsfl1c	1.31731e-126	3.14995e-122	125.88	121.502	0.270615	0.597	0.327
Nfe2l1	1.83544e-126	4.3889e-122	125.736	121.358	0.250572	0.683	0.387
Acadvl	1.94037e-126	4.63981e-122	125.712	121.333	0.433477	0.471	0.242
Adi1	2.03726e-126	4.87149e-122	125.691	121.312	0.524798	0.462	0.238
Osbpl8	2.27279e-126	5.43469e-122	125.643	121.265	0.303241	0.874	0.574
Myo1c	2.96331e-126	7.08587e-122	125.528	121.15	0.319327	0.454	0.231
Scn1b	2.97897e-126	7.12332e-122	125.526	121.147	0.208412	0.693	0.398
Farsb	3.01368e-126	7.20631e-122	125.521	121.142	0.133607	0.593	0.325
Smim15	3.99967e-126	9.56401e-122	125.398	121.019	0.244431	0.778	0.457
Dynll2	4.74512e-126	1.13465e-121	125.324	120.945	0.316873	0.81	0.487
Cox17	4.843e-126	1.15806e-121	125.315	120.936	0.314373	0.958	0.645
Tubb2a	6.58763e-126	1.57524e-121	125.181	120.803	0.372825	0.657	0.371
Otub1	6.6444e-126	1.58881e-121	125.178	120.799	0.346271	0.585	0.322
Mrpl4	1.01926e-125	2.43727e-121	124.992	120.613	0.365848	0.594	0.328
Atp1b3	1.02735e-125	2.45659e-121	124.988	120.61	0.376838	0.958	0.639
Hscb	1.3486e-125	3.22477e-121	124.87	120.492	0.267453	0.634	0.351
Copz1	1.79145e-125	4.28371e-121	124.747	120.368	0.225625	0.667	0.377
Rtraf	1.93318e-125	4.62263e-121	124.714	120.335	0.368736	0.95	0.62
Jund	2.25946e-125	5.40282e-121	124.646	120.267	0.280476	0.617	0.343
Nme4	2.32957e-125	5.57047e-121	124.633	120.254	0.756642	0.356	0.167
Maged2	2.50494e-125	5.98982e-121	124.601	120.223	0.639092	0.322	0.142
Mapk6	3.03346e-125	7.25361e-121	124.518	120.139	0.287055	0.462	0.236
Nop14	3.63379e-125	8.68912e-121	124.44	120.061	0.334512	0.486	0.251
Aph1a	3.95069e-125	9.44689e-121	124.403	120.025	0.26832	0.693	0.394
Rxylt1	4.46628e-125	1.06798e-120	124.35	119.971	0.281424	0.564	0.308
Sco2	5.13072e-125	1.22686e-120	124.29	119.911	0.763835	0.342	0.157
Prmt2	5.56963e-125	1.33181e-120	124.254	119.876	0.45205	0.379	0.179
Tmed7	7.19171e-125	1.71968e-120	124.143	119.765	0.286574	0.835	0.51
Emc10	7.84535e-125	1.87598e-120	124.105	119.727	0.291856	0.71	0.405
Tmcc3	8.30637e-125	1.98622e-120	124.081	119.702	-1.39025	0.909	0.845
Ccng1	1.02461e-124	2.45006e-120	123.989	119.611	0.345875	0.547	0.297
Plec	1.2262e-124	2.9321e-120	123.911	119.533	0.536323	0.41	0.2
Mertk	1.29596e-124	3.09889e-120	123.887	119.509	-1.20347	0.957	0.872
Reps2	1.41393e-124	3.38099e-120	123.85	119.471	0.721695	0.309	0.135
Junb	1.69069e-124	4.04278e-120	123.772	119.393	0.33995	0.637	0.365
Mrpl2	1.721e-124	4.11525e-120	123.764	119.386	0.399215	0.546	0.294
Bltp2	2.02365e-124	4.83894e-120	123.694	119.315	0.195682	0.726	0.42
Mrps26	2.62675e-124	6.28109e-120	123.581	119.202	0.344762	0.59	0.322
Plpp5	2.86246e-124	6.84471e-120	123.543	119.165	0.519611	0.355	0.164
Nipsnap3b	3.94485e-124	9.43293e-120	123.404	119.025	0.30985	0.549	0.295
Xbp1	3.9864e-124	9.53228e-120	123.399	119.021	0.301721	0.823	0.499
Gsn	4.03508e-124	9.64869e-120	123.394	119.016	0.0605439	0.529	0.276
Rer1	5.13547e-124	1.22799e-119	123.289	118.911	0.315402	0.897	0.561
Sgk1	6.83617e-124	1.63467e-119	123.165	118.787	0.521921	0.722	0.437
Eif3d	7.61067e-124	1.81986e-119	123.119	118.74	0.293919	0.71	0.406
Copg1	7.93429e-124	1.89725e-119	123.1	118.722	0.281042	0.501	0.264
Fkbp3	8.77302e-124	2.0978e-119	123.057	118.678	0.314809	0.787	0.464
Hspbp1	1.0017e-123	2.39527e-119	122.999	118.621	0.380682	0.431	0.216
Plk3	1.03067e-123	2.46455e-119	122.987	118.608	0.534201	0.368	0.175
Ctdnep1	1.07082e-123	2.56053e-119	122.97	118.592	0.335934	0.628	0.346
Ftsj3	1.09603e-123	2.62084e-119	122.96	118.582	0.433036	0.485	0.254
Sgpl1	1.18218e-123	2.82684e-119	122.927	118.549	0.339936	0.903	0.597
Tax1bp3	1.33735e-123	3.19787e-119	122.874	118.495	0.383895	0.534	0.287
Eif2b5	1.41553e-123	3.38481e-119	122.849	118.47	0.404254	0.463	0.239
Prdx4	1.47094e-123	3.51731e-119	122.832	118.454	0.338523	0.861	0.523
Ldlrad4	1.48694e-123	3.55557e-119	122.828	118.449	-1.39639	0.949	0.859
Mtarc2	1.49717e-123	3.58003e-119	122.825	118.446	0.252658	0.808	0.48
App	1.70441e-123	4.07558e-119	122.768	118.39	0.337077	0.957	0.672
Ndufv1	1.7199e-123	4.11261e-119	122.764	118.386	0.339342	0.615	0.346
Hacd1	1.89611e-123	4.53399e-119	122.722	118.344	0.579875	0.36	0.17
1110004F10Rik	1.98039e-123	4.73551e-119	122.703	118.325	0.284277	0.823	0.5
Asl	2.28027e-123	5.45259e-119	122.642	118.263	0.441694	0.424	0.212
9530068E07Rik	2.41432e-123	5.77311e-119	122.617	118.239	0.235694	0.693	0.397
Sgta	2.83333e-123	6.77505e-119	122.548	118.169	0.206468	0.579	0.317
Rps3	2.84645e-123	6.80644e-119	122.546	118.167	0.359501	0.999	0.864
Sf3b5	3.42151e-123	8.18151e-119	122.466	118.087	0.326429	0.878	0.537
Alg3	3.91523e-123	9.3621e-119	122.407	118.029	0.799454	0.312	0.137
Gm19705	4.42571e-123	1.05828e-118	122.354	117.975	0.975272	0.189	0.064
Slc16a10	4.45058e-123	1.06422e-118	122.352	117.973	0.111278	0.706	0.407
Tpd52l2	4.51709e-123	1.08013e-118	122.345	117.967	0.23617	0.673	0.382
Mphosph8	4.61501e-123	1.10354e-118	122.336	117.957	0.201469	0.717	0.41
Dld	4.80199e-123	1.14825e-118	122.319	117.94	0.225155	0.618	0.341
Tecpr1	5.33019e-123	1.27456e-118	122.273	117.895	0.17476	0.463	0.238
Erp44	5.84282e-123	1.39714e-118	122.233	117.855	0.204899	0.746	0.44
Coa6	7.8656e-123	1.88082e-118	122.104	117.726	0.374962	0.535	0.29
Parl	9.04813e-123	2.16359e-118	122.043	117.665	0.217861	0.559	0.304
Mospd2	1.03696e-122	2.47959e-118	121.984	117.606	0.174234	0.609	0.338
Dnajc2	1.31199e-122	3.13723e-118	121.882	117.503	0.245736	0.749	0.434
Pomp	1.36056e-122	3.25338e-118	121.866	117.488	0.364163	0.983	0.709
Peak1	1.4748e-122	3.52654e-118	121.831	117.453	0.110071	0.819	0.513
Ankrd44	1.62731e-122	3.89123e-118	121.789	117.41	-1.44625	0.856	0.786
Uqcc4	2.50208e-122	5.98298e-118	121.602	117.223	0.305903	0.538	0.291
Creb3	2.64734e-122	6.33031e-118	121.577	117.199	0.411605	0.473	0.247
Mfsd11	2.72555e-122	6.51733e-118	121.565	117.186	0.138064	0.673	0.383
Rps20	3.05348e-122	7.30147e-118	121.515	117.137	0.336784	1	0.912
Luzp1	3.27681e-122	7.83551e-118	121.485	117.106	0.138728	0.7	0.404
Rpl10-ps3	3.5638e-122	8.52175e-118	121.448	117.069	0.250606	0.635	0.355
Yipf5	4.26024e-122	1.01871e-117	121.371	116.992	0.270998	0.638	0.363
Ergic3	5.18214e-122	1.23915e-117	121.285	116.907	0.331369	0.888	0.548
Sdhaf1	6.57746e-122	1.5728e-117	121.182	116.803	0.491324	0.397	0.193
Polr3d	6.89791e-122	1.64943e-117	121.161	116.783	0.629578	0.323	0.146
Nagpa	7.22514e-122	1.72768e-117	121.141	116.763	0.313881	0.649	0.371
Ebp	7.52026e-122	1.79824e-117	121.124	116.745	0.310057	0.772	0.458
Srpr	8.28498e-122	1.9811e-117	121.082	116.703	0.229159	0.818	0.487
Pigs	9.21257e-122	2.20291e-117	121.036	116.657	0.442392	0.457	0.236
Gfus	1.04953e-121	2.50963e-117	120.979	116.6	0.443397	0.461	0.24
Cacnb2	1.1531e-121	2.7573e-117	120.938	116.56	-2.63565	0.321	0.496
Rfk	1.18133e-121	2.82479e-117	120.928	116.549	0.441132	0.464	0.241
Slco2b1	1.47734e-121	3.53262e-117	120.831	116.452	-1.34322	0.866	0.792
Chmp3	1.93599e-121	4.62933e-117	120.713	116.334	0.275303	0.89	0.581
Anapc11	2.01089e-121	4.80843e-117	120.697	116.318	0.280711	0.824	0.493
Fh1	2.19372e-121	5.24563e-117	120.659	116.28	0.384115	0.522	0.279
Prdx6	2.22987e-121	5.33205e-117	120.652	116.273	0.0880906	0.685	0.383
Nat9	2.70422e-121	6.46634e-117	120.568	116.189	0.304279	0.515	0.277
Adrm1	2.72285e-121	6.51089e-117	120.565	116.186	0.391317	0.475	0.246
Erh	2.82212e-121	6.74826e-117	120.549	116.171	0.278935	0.657	0.371
Eci1	2.89774e-121	6.92908e-117	120.538	116.159	0.374343	0.509	0.272
Nudt19	3.11573e-121	7.45032e-117	120.506	116.128	0.582222	0.419	0.21
Chchd4	3.17203e-121	7.58495e-117	120.499	116.12	0.49564	0.41	0.203
Plekhj1	3.19517e-121	7.6403e-117	120.496	116.117	0.275422	0.731	0.423
Rps23	3.36878e-121	8.05543e-117	120.473	116.094	0.322918	1	0.924
Xlr	3.90357e-121	9.33421e-117	120.409	116.03	0.277549	0.801	0.486
Bcl2a1a	3.94788e-121	9.44017e-117	120.404	116.025	0.636719	0.412	0.205
Serinc3	4.41889e-121	1.05665e-116	120.355	115.976	-0.561243	0.992	0.902
Dnaja2	4.93702e-121	1.18054e-116	120.307	115.928	0.311825	0.83	0.51
Triap1	6.36063e-121	1.52095e-116	120.196	115.818	0.373985	0.547	0.299
Elof1	6.36931e-121	1.52303e-116	120.196	115.817	0.264926	0.721	0.41
Sar1b	6.40367e-121	1.53125e-116	120.194	115.815	0.251069	0.791	0.473
Plbd2	6.67014e-121	1.59496e-116	120.176	115.797	0.312407	0.684	0.396
Jag1	7.27479e-121	1.73955e-116	120.138	115.76	1.44723	0.145	0.042
Uba5	8.22097e-121	1.9658e-116	120.085	115.706	0.135851	0.692	0.399
Ccdc167	9.14682e-121	2.18719e-116	120.039	115.66	0.305678	0.483	0.254
Mvb12a	1.03372e-120	2.47183e-116	119.986	115.607	0.335502	0.637	0.36
Ckap4	1.05933e-120	2.53306e-116	119.975	115.596	0.436806	0.5	0.267
Serbp1	1.07102e-120	2.56103e-116	119.97	115.592	0.385298	0.98	0.712
Atxn10	1.07825e-120	2.5783e-116	119.967	115.589	0.260026	0.887	0.564
Mrpl22	1.22193e-120	2.92187e-116	119.913	115.534	0.327444	0.535	0.286
Qpct	1.36579e-120	3.26588e-116	119.865	115.486	1.0735	0.242	0.095
Galnt7	1.41542e-120	3.38455e-116	119.849	115.47	0.105947	0.802	0.484
Arpc4	1.52955e-120	3.65746e-116	119.815	115.437	0.34573	0.969	0.693
Rpl17	1.53785e-120	3.6773e-116	119.813	115.434	0.342727	0.999	0.878
Snrnp27	2.02877e-120	4.85119e-116	119.693	115.314	0.277666	0.804	0.482
Vapb	2.03631e-120	4.86923e-116	119.691	115.313	0.250847	0.758	0.451
Ss18l2	2.59125e-120	6.19621e-116	119.586	115.208	0.59595	0.364	0.174
Atp5c1	2.94894e-120	7.05149e-116	119.53	115.152	0.370246	0.969	0.686
Etfa	2.97866e-120	7.12256e-116	119.526	115.147	0.220558	0.741	0.434
Rps26	3.05921e-120	7.31519e-116	119.514	115.136	0.308519	1	0.889
Usp5	3.91547e-120	9.36267e-116	119.407	115.029	0.290691	0.505	0.268
Snrpc	4.24244e-120	1.01445e-115	119.372	114.994	0.290253	0.764	0.449
Mr1	4.46218e-120	1.067e-115	119.35	114.972	0.588773	0.333	0.152
Hspa8	6.7178e-120	1.60636e-115	119.173	114.794	0.367288	0.999	0.817
Tex261	7.24307e-120	1.73196e-115	119.14	114.761	0.329177	0.761	0.447
Crat	8.52412e-120	2.03829e-115	119.069	114.691	0.211556	0.587	0.324
Szrd1	1.02589e-119	2.45311e-115	118.989	114.61	0.233793	0.651	0.373
Wfdc17	1.10468e-119	2.64152e-115	118.957	114.578	0.306733	0.826	0.532
Yrdc	1.30318e-119	3.11617e-115	118.885	114.506	0.49287	0.369	0.176
Eif2s3x	1.36403e-119	3.26167e-115	118.865	114.487	0.254606	0.593	0.327
Bri3bp	1.41812e-119	3.391e-115	118.848	114.47	0.450944	0.376	0.18
Rpl3	1.45934e-119	3.48957e-115	118.836	114.457	0.355387	1	0.844
Cisd3	1.73973e-119	4.16003e-115	118.76	114.381	0.547955	0.339	0.156
Rpl27a	1.80883e-119	4.32528e-115	118.743	114.364	0.319998	1	0.926
Aarsd1	1.86064e-119	4.44916e-115	118.73	114.352	0.301296	0.65	0.363
Smim12	2.09322e-119	5.00531e-115	118.679	114.301	0.387679	0.528	0.286
Timm10b	2.24269e-119	5.36272e-115	118.649	114.271	0.321175	0.948	0.641
Hikeshi	2.70904e-119	6.47786e-115	118.567	114.189	0.247752	0.612	0.342
Gnai2	2.94835e-119	7.0501e-115	118.53	114.152	0.382667	0.995	0.778
Mrps17	3.4714e-119	8.3008e-115	118.459	114.081	0.22459	0.696	0.401
Rpl24	4.39362e-119	1.0506e-114	118.357	113.979	0.337879	0.999	0.856
Gm2629	7.63128e-119	1.82479e-114	118.117	113.739	-1.51069	0.878	0.81
Gtpbp4	7.78927e-119	1.86257e-114	118.109	113.73	0.274649	0.607	0.343
Rpn2	9.91008e-119	2.3697e-114	118.004	113.625	0.335505	0.952	0.626
Sptbn1	1.01913e-118	2.43694e-114	117.992	113.613	0.299149	0.52	0.276
Snhg6	1.02758e-118	2.45715e-114	117.988	113.61	0.288463	0.691	0.399
Eny2	1.03727e-118	2.48033e-114	117.984	113.605	0.201408	0.735	0.425
Trap1	1.50662e-118	3.60262e-114	117.822	113.443	0.238728	0.488	0.258
Arpc5l	1.65116e-118	3.94825e-114	117.782	113.404	0.263984	0.808	0.479
Gatm	1.79199e-118	4.28501e-114	117.747	113.368	0.40285	0.87	0.556
Mfsd5	1.80518e-118	4.31656e-114	117.743	113.365	0.47149	0.464	0.243
Igsf8	2.11416e-118	5.05538e-114	117.675	113.296	0.352037	0.566	0.313
Dctpp1	2.4199e-118	5.78647e-114	117.616	113.238	0.286749	0.811	0.482
Vdac3	2.53204e-118	6.05461e-114	117.597	113.218	0.315067	0.872	0.54
Spryd7	2.72002e-118	6.5041e-114	117.565	113.187	0.650349	0.343	0.161
Polr3k	2.86565e-118	6.85234e-114	117.543	113.164	0.330507	0.505	0.27
Pdha1	3.21084e-118	7.67777e-114	117.493	113.115	0.310376	0.525	0.287
Tln1	3.28676e-118	7.85929e-114	117.483	113.105	0.365954	0.986	0.736
Rps27a	3.46234e-118	8.27915e-114	117.461	113.082	0.313287	1	0.928
Cwc15	3.7187e-118	8.89215e-114	117.43	113.051	0.320448	0.884	0.564
Cdhr3	3.77559e-118	9.02819e-114	117.423	113.044	1.72556	0.124	0.033
Selenon	4.07285e-118	9.73899e-114	117.39	113.011	0.473065	0.377	0.184
Zcchc9	4.09523e-118	9.79252e-114	117.388	113.009	0.187043	0.549	0.296
Fkbp4	4.56074e-118	1.09056e-113	117.341	112.962	0.257934	0.616	0.346
Eef2	4.57695e-118	1.09444e-113	117.339	112.961	0.374599	0.987	0.729
Phyh	4.84012e-118	1.15737e-113	117.315	112.937	0.267115	0.629	0.356
Mrpl46	5.47216e-118	1.3085e-113	117.262	112.883	0.455789	0.467	0.247
Eif3k	6.26098e-118	1.49713e-113	117.203	112.825	0.368877	0.963	0.649
Ikzf1	6.54446e-118	1.56491e-113	117.184	112.806	-1.16247	0.924	0.833
Ncln	7.09955e-118	1.69764e-113	117.149	112.77	0.198833	0.563	0.31
9130401M01Rik	7.21149e-118	1.72441e-113	117.142	112.763	0.517046	0.411	0.208
Acsl5	7.21958e-118	1.72635e-113	117.141	112.763	0.171817	0.675	0.385
Tmbim4	7.84004e-118	1.87471e-113	117.106	112.727	0.29482	0.877	0.556
Rpl7l1	9.43948e-118	2.25717e-113	117.025	112.646	0.246449	0.754	0.44
Nsa2	1.0721e-117	2.5636e-113	116.97	112.591	0.384283	0.967	0.656
Tpm1	1.15785e-117	2.76865e-113	116.936	112.558	0.292286	0.437	0.224
Chchd7	1.27786e-117	3.05563e-113	116.894	112.515	0.400875	0.483	0.257
Tubb6	1.42372e-117	3.40439e-113	116.847	112.468	0.680183	0.367	0.177
Phf23	1.55703e-117	3.72316e-113	116.808	112.429	0.338586	0.506	0.271
Rwdd4a	1.89808e-117	4.53869e-113	116.722	112.343	0.391694	0.439	0.225
Rpl26	1.91178e-117	4.57144e-113	116.719	112.34	0.324205	1	0.908
Tmem123	2.09465e-117	5.00872e-113	116.679	112.3	0.221754	0.574	0.319
Dhrs4	2.0981e-117	5.01698e-113	116.678	112.3	0.322995	0.501	0.268
Acadm	2.9617e-117	7.08202e-113	116.528	112.15	0.19907	0.733	0.427
Basp1	3.27658e-117	7.83495e-113	116.485	112.106	0.353068	0.998	0.857
Nudt9	4.00245e-117	9.57067e-113	116.398	112.019	0.260006	0.607	0.341
As3mt	4.38338e-117	1.04815e-112	116.358	111.98	0.231597	0.624	0.355
Tusc3	4.92627e-117	1.17797e-112	116.307	111.929	0.146124	0.563	0.308
Pigx	5.23102e-117	1.25084e-112	116.281	111.903	0.179513	0.587	0.325
Fam136a	6.03123e-117	1.44219e-112	116.22	111.841	0.55554	0.359	0.172
Niban2	6.55779e-117	1.5681e-112	116.183	111.805	0.382713	0.404	0.2
Rplp2	6.56361e-117	1.56949e-112	116.183	111.804	0.315292	1	0.902
Mpc2	6.978e-117	1.66858e-112	116.156	111.778	0.301967	0.893	0.563
St13	7.36675e-117	1.76154e-112	116.133	111.754	0.344977	0.973	0.692
Josd2	8.44689e-117	2.01982e-112	116.073	111.695	0.313239	0.472	0.247
Pmvk	1.00554e-116	2.40445e-112	115.998	111.619	0.518593	0.398	0.198
Ndufc2	1.04126e-116	2.48985e-112	115.982	111.604	0.348802	0.963	0.658
Rbm42	1.28309e-116	3.06812e-112	115.892	111.513	0.229339	0.638	0.361
Mtch1	1.48966e-116	3.56207e-112	115.827	111.448	0.263701	0.883	0.553
Rpp25l	1.53951e-116	3.68127e-112	115.813	111.434	0.394768	0.488	0.26
Atp6ap1	1.87977e-116	4.49491e-112	115.726	111.347	0.280657	0.877	0.552
Rpl7	1.96933e-116	4.70906e-112	115.706	111.327	0.356506	1	0.833
Rpl10	2.01071e-116	4.80801e-112	115.697	111.318	0.354129	0.998	0.835
Slc35f6	2.21113e-116	5.28726e-112	115.655	111.277	0.188382	0.528	0.287
Babam1	2.49732e-116	5.9716e-112	115.603	111.224	0.237961	0.595	0.332
Dlgap4	2.63344e-116	6.29708e-112	115.579	111.201	-0.105142	0.693	0.394
Gmpr	2.73649e-116	6.54349e-112	115.563	111.184	0.188998	0.611	0.342
Shisa5	3.41986e-116	8.17757e-112	115.466	111.087	0.299569	0.873	0.534
Tmem242	3.59188e-116	8.5889e-112	115.445	111.066	0.346784	0.471	0.249
Fchsd2	5.26724e-116	1.2595e-111	115.278	110.9	-1.51542	0.831	0.773
Tuba1c	5.35443e-116	1.28035e-111	115.271	110.893	0.119164	0.713	0.398
Decr1	5.9612e-116	1.42544e-111	115.225	110.846	0.278685	0.465	0.243
Rps25	6.023e-116	1.44022e-111	115.22	110.842	0.318944	0.998	0.876
BC028528	6.05907e-116	1.44884e-111	115.218	110.839	0.208918	0.652	0.376
Dip2b	6.22197e-116	1.4878e-111	115.206	110.827	-1.30079	0.897	0.805
Set	6.71545e-116	1.6058e-111	115.173	110.794	0.380784	0.954	0.641
Dnajb14	9.33958e-116	2.23328e-111	115.03	110.651	0.256188	0.771	0.471
Rpl23a	1.10944e-115	2.65289e-111	114.955	110.576	0.34405	0.999	0.823
Eif3j1	1.16494e-115	2.7856e-111	114.934	110.555	0.260113	0.845	0.521
Cdc42	1.26349e-115	3.02126e-111	114.898	110.52	0.294816	0.998	0.853
Psmd11	1.65392e-115	3.95485e-111	114.781	110.403	0.230922	0.786	0.472
Hnrnph2	1.75687e-115	4.20103e-111	114.755	110.377	0.18827	0.701	0.403
Septin11	1.87686e-115	4.48794e-111	114.727	110.348	0.313609	0.514	0.278
Serinc1	1.94593e-115	4.6531e-111	114.711	110.332	0.295431	0.897	0.577
Mrpl45	1.94631e-115	4.65402e-111	114.711	110.332	0.33831	0.492	0.262
Acaa1a	2.28744e-115	5.46973e-111	114.641	110.262	0.24395	0.687	0.401
Sf3b6	2.84551e-115	6.80418e-111	114.546	110.167	0.249971	0.865	0.536
Clptm1	3.10353e-115	7.42117e-111	114.508	110.13	0.215957	0.755	0.443
Rnf187	3.11049e-115	7.4378e-111	114.507	110.129	0.214693	0.69	0.396
Bcap31	3.18708e-115	7.62095e-111	114.497	110.118	0.3204	0.916	0.595
Ydjc	3.42079e-115	8.1798e-111	114.466	110.087	0.968169	0.22	0.084
Pon2	3.83869e-115	9.17906e-111	114.416	110.037	0.23424	0.877	0.559
Wtip	4.87209e-115	1.16501e-110	114.312	109.934	0.352665	0.38	0.184
Aup1	5.15891e-115	1.2336e-110	114.287	109.909	0.232833	0.813	0.488
Abhd5	5.50798e-115	1.31707e-110	114.259	109.88	0.272196	0.387	0.189
Cpt1a	5.66358e-115	1.35428e-110	114.247	109.868	0.267398	0.547	0.302
Sh3glb1	6.20454e-115	1.48363e-110	114.207	109.829	0.33669	0.994	0.805
Srp68	6.58028e-115	1.57348e-110	114.182	109.803	0.210692	0.524	0.284
Slc35b2	7.27796e-115	1.74031e-110	114.138	109.759	0.270784	0.671	0.383
Erlec1	7.89827e-115	1.88863e-110	114.102	109.724	0.213191	0.813	0.493
Mpv17l2	9.37077e-115	2.24074e-110	114.028	109.65	0.481351	0.46	0.242
Rbm3	1.36372e-114	3.26092e-110	113.865	109.487	0.364416	0.965	0.667
Ikbip	1.37334e-114	3.28393e-110	113.862	109.484	0.368724	0.373	0.181
Chid1	1.64641e-114	3.93689e-110	113.783	109.405	0.285806	0.453	0.236
Psmd9	2.03425e-114	4.86429e-110	113.692	109.313	0.242336	0.539	0.295
Fkbp11	2.28428e-114	5.46217e-110	113.641	109.263	1.52181	0.137	0.04
Commd7	2.36799e-114	5.66234e-110	113.626	109.247	0.222207	0.726	0.426
Tmem106c	3.2445e-114	7.75826e-110	113.489	109.11	0.355357	0.482	0.255
Tomm70a	4.59763e-114	1.09939e-109	113.337	108.959	0.149937	0.638	0.362
Kras	4.92887e-114	1.17859e-109	113.307	108.929	0.260095	0.899	0.585
Atp8a2	6.30611e-114	1.50792e-109	113.2	108.822	-1.87428	0.588	0.661
Bad	6.71741e-114	1.60627e-109	113.173	108.794	0.275877	0.612	0.347
Creg1	7.22415e-114	1.72744e-109	113.141	108.763	0.422623	0.993	0.75
Derl2	7.6727e-114	1.8347e-109	113.115	108.736	0.226732	0.799	0.479
Vps36	9.54769e-114	2.28304e-109	113.02	108.641	0.236708	0.725	0.423
Otulin	9.70883e-114	2.32158e-109	113.013	108.634	0.15648	0.817	0.499
Thoc6	1.06606e-113	2.54916e-109	112.972	108.594	0.45702	0.428	0.22
Gars	1.16523e-113	2.78631e-109	112.934	108.555	0.234328	0.621	0.351
Hprt	1.27083e-113	3.03881e-109	112.896	108.517	0.2776	0.916	0.593
Mtap	1.5584e-113	3.72646e-109	112.807	108.429	0.283073	0.435	0.223
Rps15	1.69674e-113	4.05723e-109	112.77	108.392	0.328131	1	0.865
Nol7	2.07064e-113	4.95131e-109	112.684	108.305	0.31696	0.898	0.57
Cd180	2.38536e-113	5.70387e-109	112.622	108.244	0.323333	0.969	0.733
Mrps15	2.41923e-113	5.78486e-109	112.616	108.238	0.255913	0.851	0.527
Pfdn2	2.47298e-113	5.9134e-109	112.607	108.228	0.243597	0.789	0.47
Aimp1	2.73412e-113	6.53783e-109	112.563	108.185	0.287324	0.853	0.527
Lsm6	3.68291e-113	8.80658e-109	112.434	108.055	0.289073	0.919	0.588
Ctbp1	3.73912e-113	8.94099e-109	112.427	108.049	0.250894	0.649	0.366
Marchf8	3.78521e-113	9.05119e-109	112.422	108.043	0.101465	0.562	0.31
Plxnc1	3.81308e-113	9.11784e-109	112.419	108.04	0.343761	0.377	0.185
Abca9	3.86112e-113	9.23271e-109	112.413	108.035	-1.74405	0.603	0.662
Sf3b4	4.7659e-113	1.13962e-108	112.322	107.943	0.334093	0.483	0.257
Uqcc5	4.88678e-113	1.16853e-108	112.311	107.932	0.23225	0.645	0.374
Fibp	5.27929e-113	1.26238e-108	112.277	107.899	0.245389	0.584	0.329
Eef1akmt4	5.33736e-113	1.27627e-108	112.273	107.894	0.619895	0.29	0.129
Cox6a2	5.53277e-113	1.323e-108	112.257	107.878	0.606607	0.394	0.197
Lyrm2	6.1369e-113	1.46745e-108	112.212	107.833	0.218938	0.601	0.339
Spns1	6.29567e-113	1.50542e-108	112.201	107.822	0.218259	0.458	0.239
Immt	6.93642e-113	1.65864e-108	112.159	107.78	0.230759	0.832	0.502
Mrpl48	7.06461e-113	1.68929e-108	112.151	107.772	0.268815	0.683	0.402
Rapsn	8.21719e-113	1.96489e-108	112.085	107.707	0.388608	0.595	0.34
Chmp5	8.30486e-113	1.98586e-108	112.081	107.702	0.268684	0.86	0.534
Airn	9.221e-113	2.20493e-108	112.035	107.657	1.00044	0.225	0.088
Abce1	9.33653e-113	2.23255e-108	112.03	107.651	0.168633	0.639	0.368
Lgmn	9.76183e-113	2.33425e-108	112.01	107.632	0.265724	1	0.951
Hspa13	9.88545e-113	2.36381e-108	112.005	107.626	0.316585	0.511	0.277
Apoe	1.15509e-112	2.76206e-108	111.937	107.559	0.351804	1	0.996
Fam167b	1.26331e-112	3.02084e-108	111.898	107.52	0.317025	0.605	0.342
Smim10l1	1.29819e-112	3.10423e-108	111.887	107.508	0.21364	0.584	0.33
Anapc15	1.38046e-112	3.30095e-108	111.86	107.481	-0.0236902	0.836	0.522
Ube2n	1.49843e-112	3.58304e-108	111.824	107.446	0.212886	0.827	0.501
Edem1	1.60472e-112	3.83722e-108	111.795	107.416	0.279855	0.943	0.659
Dbnl	3.67841e-112	8.7958e-108	111.434	107.056	0.195706	0.799	0.486
Abcf2	3.69159e-112	8.82734e-108	111.433	107.054	0.270462	0.506	0.274
Gpr84	3.80243e-112	9.09238e-108	111.42	107.041	0.507472	0.657	0.388
Msrb1	4.05339e-112	9.69247e-108	111.392	107.014	0.0784176	0.748	0.439
Ipo4	4.30873e-112	1.0303e-107	111.366	106.987	0.538358	0.319	0.148
Plk2	4.94146e-112	1.1816e-107	111.306	106.928	1.87062	0.1	0.023
Pmm1	5.06029e-112	1.21002e-107	111.296	106.917	0.655947	0.313	0.143
Rpp21	5.25601e-112	1.25682e-107	111.279	106.901	0.268723	0.578	0.325
Map7d1	5.44875e-112	1.3029e-107	111.264	106.885	0.156961	0.648	0.366
Plp2	6.8233e-112	1.63159e-107	111.166	106.787	0.753867	0.292	0.13
Lrp10	7.04882e-112	1.68551e-107	111.152	106.773	0.215103	0.655	0.376
Alkbh5	7.47942e-112	1.78848e-107	111.126	106.748	0.268851	0.541	0.299
Rps11	7.62373e-112	1.82299e-107	111.118	106.739	0.304612	1	0.905
Ube2q1	8.64264e-112	2.06663e-107	111.063	106.685	0.224703	0.768	0.449
Ube2a	8.6719e-112	2.07363e-107	111.062	106.683	0.257427	0.786	0.473
Ufsp2	1.02183e-111	2.44341e-107	110.991	106.612	0.216893	0.825	0.517
Cd22	1.03038e-111	2.46385e-107	110.987	106.608	0.591996	0.326	0.152
Eef1d	1.07549e-111	2.57172e-107	110.968	106.59	0.349261	0.966	0.656
Rrs1	1.14212e-111	2.73104e-107	110.942	106.564	0.65474	0.328	0.153
Angptl4	1.19729e-111	2.86297e-107	110.922	106.543	1.27741	0.19	0.069
Sdhaf4	1.39424e-111	3.33391e-107	110.856	106.477	0.252894	0.621	0.355
Nubp1	1.40469e-111	3.3589e-107	110.852	106.474	0.258256	0.613	0.347
Mapk3	1.4539e-111	3.47657e-107	110.837	106.459	0.273406	0.838	0.51
Rps12	1.55054e-111	3.70764e-107	110.81	106.431	0.305237	1	0.94
Cybb	1.73097e-111	4.13908e-107	110.762	106.383	0.445982	0.502	0.271
Mrps11	1.84019e-111	4.40025e-107	110.735	106.357	0.304716	0.535	0.295
Cript	1.84362e-111	4.40846e-107	110.734	106.356	0.195137	0.786	0.471
Kif3a	1.9693e-111	4.70899e-107	110.706	106.327	0.39999	0.412	0.209
Rrp15	2.11453e-111	5.05626e-107	110.675	106.296	0.442556	0.381	0.19
Hadhb	2.19681e-111	5.25301e-107	110.658	106.28	0.245855	0.64	0.369
Dnase1l1	2.48843e-111	5.95034e-107	110.604	106.225	0.447147	0.396	0.2
Arpp19	2.5166e-111	6.0177e-107	110.599	106.221	0.297598	0.94	0.624
Ywhaq	2.8484e-111	6.8111e-107	110.545	106.167	0.281278	0.887	0.556
Fam174a	2.90178e-111	6.93874e-107	110.537	106.159	0.251536	0.726	0.43
Hint2	3.3694e-111	8.05692e-107	110.472	106.094	0.291315	0.613	0.349
Plekhm2	3.59175e-111	8.58859e-107	110.445	106.066	-0.00114187	0.698	0.406
Cd300ld	3.72203e-111	8.90012e-107	110.429	106.051	0.154079	0.341	0.162
Ctnnb1	4.12716e-111	9.86887e-107	110.384	106.006	0.288434	0.894	0.573
Emd	4.56028e-111	1.09045e-106	110.341	105.962	0.249238	0.583	0.326
Lrrc58	4.75075e-111	1.136e-106	110.323	105.945	0.0677292	0.72	0.421
Stxbp2	7.27665e-111	1.73999e-106	110.138	105.759	0.159312	0.551	0.306
Rpl5	9.38837e-111	2.24495e-106	110.027	105.649	0.325517	0.998	0.837
Tmed4	9.56872e-111	2.28807e-106	110.019	105.641	0.208966	0.515	0.28
Grhpr	9.78065e-111	2.33875e-106	110.01	105.631	0.599067	0.329	0.155
Eif4g1	1.02559e-110	2.4524e-106	109.989	105.61	0.272966	0.881	0.566
Timm22	1.19568e-110	2.85911e-106	109.922	105.544	0.352876	0.499	0.272
Brix1	1.21446e-110	2.90402e-106	109.916	105.537	0.251508	0.513	0.279
Med9	1.24751e-110	2.98306e-106	109.904	105.525	0.335768	0.476	0.252
Cd151	1.81478e-110	4.33949e-106	109.741	105.363	0.382875	0.445	0.232
Carnmt1	1.81756e-110	4.34614e-106	109.741	105.362	0.240908	0.507	0.275
Afg3l2	1.81933e-110	4.35038e-106	109.74	105.361	0.14208	0.477	0.254
Slc2a1	1.99894e-110	4.77986e-106	109.699	105.321	0.391842	0.37	0.182
Rab1a	2.68427e-110	6.41862e-106	109.571	105.193	0.290189	0.906	0.597
Mrpl39	2.7908e-110	6.67336e-106	109.554	105.176	0.364334	0.415	0.213
Fnip2	2.87335e-110	6.87077e-106	109.542	105.163	0.198306	0.839	0.541
Psme3	2.9644e-110	7.08846e-106	109.528	105.149	0.319517	0.467	0.248
Exosc3	3.15319e-110	7.53991e-106	109.501	105.123	0.340983	0.483	0.261
Ptchd1	3.28219e-110	7.84837e-106	109.484	105.105	0.631629	0.204	0.076
Efhd2	3.50328e-110	8.37705e-106	109.456	105.077	0.352236	0.979	0.714
Lmo2	3.81673e-110	9.12657e-106	109.418	105.04	0.240567	0.939	0.638
Cdc42se1	4.26966e-110	1.02096e-105	109.37	104.991	0.221253	0.746	0.443
Pwp1	4.4129e-110	1.05521e-105	109.355	104.977	0.363593	0.428	0.222
Nubp2	4.70539e-110	1.12515e-105	109.327	104.949	0.385401	0.439	0.23
Tmf1	5.04568e-110	1.20652e-105	109.297	104.918	0.171866	0.815	0.497
Lpgat1	5.69258e-110	1.36121e-105	109.245	104.866	0.0891845	0.746	0.457
Rnf5	5.91641e-110	1.41473e-105	109.228	104.849	0.299014	0.57	0.318
Gosr2	7.7283e-110	1.84799e-105	109.112	104.733	0.163891	0.501	0.27
Srrd	9.53068e-110	2.27898e-105	109.021	104.642	0.367415	0.439	0.229
Ak2	9.82265e-110	2.34879e-105	109.008	104.629	0.202101	0.701	0.407
Ndufaf4	1.0254e-109	2.45193e-105	108.989	104.61	0.234961	0.431	0.223
Pmpcb	1.05378e-109	2.5198e-105	108.977	104.599	0.273181	0.564	0.318
Anapc13	1.08011e-109	2.58276e-105	108.967	104.588	0.29462	0.938	0.607
Gltp	1.08975e-109	2.60582e-105	108.963	104.584	0.292914	0.81	0.483
1700123O20Rik	1.22766e-109	2.93557e-105	108.911	104.532	0.270998	0.505	0.275
Gfpt1	1.25225e-109	2.99439e-105	108.902	104.524	0.0976809	0.605	0.345
Cyb5r4	1.28788e-109	3.07957e-105	108.89	104.512	0.0832438	0.643	0.369
Urod	1.7671e-109	4.22548e-105	108.753	104.374	0.394997	0.403	0.205
Cs	1.85258e-109	4.42989e-105	108.732	104.354	0.133267	0.636	0.363
Tnni2	1.88414e-109	4.50536e-105	108.725	104.346	0.379114	0.479	0.259
Vamp8	1.96036e-109	4.68762e-105	108.708	104.329	0.310753	0.976	0.695
Tpbgl	2.0948e-109	5.00909e-105	108.679	104.3	0.39465	0.433	0.225
Klc4	2.89086e-109	6.91261e-105	108.539	104.16	0.330458	0.419	0.217
Tmem86a	3.30816e-109	7.91047e-105	108.48	104.102	0.289409	0.828	0.518
Mthfsl	3.8576e-109	9.22428e-105	108.414	104.035	0.118906	0.616	0.349
Elp5	3.85775e-109	9.22465e-105	108.414	104.035	0.367027	0.429	0.223
Rpl9-ps6	4.19362e-109	1.00278e-104	108.377	103.999	0.220592	0.652	0.374
Pcbp1	4.24248e-109	1.01446e-104	108.372	103.994	0.296101	0.91	0.569
Dpagt1	4.29423e-109	1.02684e-104	108.367	103.988	0.370747	0.442	0.233
Arcn1	5.16437e-109	1.2349e-104	108.287	103.908	0.202563	0.766	0.468
Dnttip2	7.63946e-109	1.82675e-104	108.117	103.738	0.178864	0.654	0.375
Mpnd	8.51458e-109	2.03601e-104	108.07	103.691	0.504666	0.38	0.19
Mettl23	8.87567e-109	2.12235e-104	108.052	103.673	0.218356	0.659	0.381
Uchl3	9.82448e-109	2.34923e-104	108.008	103.629	0.144822	0.691	0.403
Dgcr6	9.91703e-109	2.37136e-104	108.004	103.625	0.451731	0.414	0.213
Polr1h	1.27413e-108	3.04671e-104	107.895	103.516	0.199286	0.644	0.37
Scp2	1.37925e-108	3.29806e-104	107.86	103.482	0.243224	0.778	0.47
Pxdc1	1.42443e-108	3.40611e-104	107.846	103.468	0.38713	0.322	0.15
Hsp90aa1	1.64059e-108	3.92297e-104	107.785	103.406	0.307098	0.966	0.662
Mrpl32	1.88985e-108	4.519e-104	107.724	103.345	0.245825	0.612	0.35
Canx	1.99186e-108	4.76294e-104	107.701	103.322	0.331698	0.988	0.771
4933406I18Rik	2.05927e-108	4.92412e-104	107.686	103.308	-1.57922	0.864	0.787
Cops7a	2.45444e-108	5.86905e-104	107.61	103.231	0.234263	0.502	0.273
Apip	2.74781e-108	6.57055e-104	107.561	103.182	0.225365	0.594	0.336
Rreb1	2.78844e-108	6.66771e-104	107.555	103.176	-1.23123	0.94	0.843
Dnaja1	2.89843e-108	6.93073e-104	107.538	103.159	0.274112	0.935	0.628
Commd1	2.91917e-108	6.98033e-104	107.535	103.156	0.224263	0.857	0.542
Nfkbib	3.02842e-108	7.24155e-104	107.519	103.14	0.389264	0.41	0.211
Slc38a10	3.09553e-108	7.40203e-104	107.509	103.131	0.126836	0.736	0.435
Apmap	3.10097e-108	7.41505e-104	107.509	103.13	0.414864	0.419	0.217
Sypl	3.16144e-108	7.55964e-104	107.5	103.121	0.198125	0.804	0.487
Pmpca	3.44021e-108	8.22623e-104	107.463	103.085	0.258751	0.471	0.254
Pitrm1	3.46461e-108	8.28457e-104	107.46	103.082	0.283986	0.42	0.216
Zc3h15	3.79532e-108	9.07538e-104	107.421	103.042	0.184118	0.829	0.502
Apoc2	4.12285e-108	9.85855e-104	107.385	103.006	-0.0420159	0.738	0.427
Tmem134	4.30407e-108	1.02919e-103	107.366	102.988	0.195763	0.765	0.451
Sec11a	4.75266e-108	1.13645e-103	107.323	102.944	0.214555	0.829	0.511
Sec61a1	5.39879e-108	1.29096e-103	107.268	102.889	0.0736587	0.705	0.415
Mtpn	5.76928e-108	1.37955e-103	107.239	102.86	0.268024	0.845	0.514
Ywhaz	6.62564e-108	1.58432e-103	107.179	102.8	0.334035	0.954	0.666
Cfdp1	7.5907e-108	1.81509e-103	107.12	102.741	0.205781	0.842	0.524
Stt3b	7.79481e-108	1.86389e-103	107.108	102.73	0.0926346	0.731	0.429
Tcp11l1	1.06402e-107	2.54428e-103	106.973	102.594	0.0776541	0.508	0.279
Nop58	1.07424e-107	2.56872e-103	106.969	102.59	0.29725	0.609	0.352
Ndufa1	1.44371e-107	3.45221e-103	106.841	102.462	0.318931	0.97	0.657
Rab18	1.52572e-107	3.6483e-103	106.817	102.438	0.198303	0.741	0.444
Son	2.49534e-107	5.96686e-103	106.603	102.224	-0.704422	0.984	0.892
Akt1s1	2.81889e-107	6.74053e-103	106.55	102.171	0.338028	0.395	0.199
Pdcd11	2.91762e-107	6.97661e-103	106.535	102.156	0.227201	0.506	0.279
Gpsm3	3.0865e-107	7.38043e-103	106.511	102.132	0.202636	0.825	0.508
Mesd	3.14457e-107	7.51929e-103	106.502	102.124	0.26581	0.605	0.344
Ube2w	3.20942e-107	7.67436e-103	106.494	102.115	0.0628484	0.758	0.464
Prmt7	3.43967e-107	8.22495e-103	106.463	102.085	0.157123	0.446	0.237
B4galt5	3.70473e-107	8.85875e-103	106.431	102.053	0.146523	0.513	0.284
Mtfr1l	3.93387e-107	9.40668e-103	106.405	102.027	0.178605	0.645	0.374
Eif4a3	4.13089e-107	9.87779e-103	106.384	102.005	0.213941	0.712	0.416
Agmo	4.9171e-107	1.17578e-102	106.308	101.93	-2.13355	0.522	0.61
Atad3a	5.46208e-107	1.30609e-102	106.263	101.884	0.404921	0.364	0.18
Tsn	5.48187e-107	1.31082e-102	106.261	101.882	0.273969	0.838	0.506
Dnajc25	7.00331e-107	1.67463e-102	106.155	101.776	0.267092	0.453	0.24
Gpaa1	7.33671e-107	1.75435e-102	106.134	101.756	0.267753	0.534	0.296
Pop7	7.67065e-107	1.83421e-102	106.115	101.737	0.436422	0.468	0.255
Mfsd12	7.83767e-107	1.87414e-102	106.106	101.727	0.388145	0.425	0.224
Mtx2	1.06699e-106	2.55139e-102	105.972	101.593	0.143498	0.605	0.346
Sptssa	1.08825e-106	2.60222e-102	105.963	101.585	0.300518	0.876	0.546
Taldo1	1.13363e-106	2.71073e-102	105.946	101.567	0.325393	0.957	0.667
Copz2	1.16688e-106	2.79023e-102	105.933	101.554	0.396708	0.334	0.158
Pgm3	1.30102e-106	3.11099e-102	105.886	101.507	0.326475	0.327	0.154
Ddrgk1	1.55134e-106	3.70956e-102	105.809	101.431	0.270271	0.877	0.553
Bcl7b	1.5804e-106	3.77906e-102	105.801	101.423	0.187771	0.543	0.303
Pdk3	1.72176e-106	4.11707e-102	105.764	101.385	0.267756	0.444	0.235
Tmx1	1.80189e-106	4.30868e-102	105.744	101.366	0.216005	0.662	0.382
Copb1	2.14829e-106	5.137e-102	105.668	101.289	0.244158	0.818	0.51
Tpgs2	2.14866e-106	5.13788e-102	105.668	101.289	0.523856	0.348	0.169
Snrpf	2.23889e-106	5.35364e-102	105.65	101.271	0.339989	0.941	0.62
Vps26a	2.27118e-106	5.43085e-102	105.644	101.265	0.105626	0.768	0.461
Ube2f	2.43689e-106	5.82708e-102	105.613	101.235	0.0984505	0.679	0.396
Galnt6	2.56795e-106	6.14048e-102	105.59	101.212	0.638869	0.278	0.123
Nab1	2.59369e-106	6.20203e-102	105.586	101.207	0.172376	0.502	0.274
Cnih4	2.71094e-106	6.48239e-102	105.567	101.188	0.248856	0.864	0.534
Slc9a9	2.71833e-106	6.50006e-102	105.566	101.187	-1.16283	0.938	0.852
Bst2	2.87851e-106	6.8831e-102	105.541	101.162	0.293115	0.966	0.665
Peds1	3.00274e-106	7.18016e-102	105.522	101.144	0.0896562	0.595	0.339
Imp3	4.22013e-106	1.00912e-101	105.375	100.996	0.246722	0.655	0.383
Agpat2	4.24092e-106	1.01409e-101	105.373	100.994	0.58574	0.329	0.158
Rab20	4.60727e-106	1.10169e-101	105.337	100.958	0.256378	0.475	0.261
Lrrc25	4.83938e-106	1.15719e-101	105.315	100.937	0.184683	0.561	0.315
Anapc2	5.13341e-106	1.2275e-101	105.29	100.911	0.179489	0.576	0.325
Smim1	6.11186e-106	1.46147e-101	105.214	100.835	0.346396	0.401	0.203
Pcbd2	6.29414e-106	1.50506e-101	105.201	100.822	0.111968	0.778	0.47
Paics	6.97368e-106	1.66755e-101	105.157	100.778	0.248101	0.669	0.386
Isca1	7.32762e-106	1.75218e-101	105.135	100.756	0.324814	0.345	0.167
Malsu1	7.38485e-106	1.76587e-101	105.132	100.753	0.151148	0.637	0.369
Prune2	8.14898e-106	1.94858e-101	105.089	100.71	0.0241394	0.627	0.357
Abi2	9.68094e-106	2.31491e-101	105.014	100.635	0.108222	0.506	0.277
Itgb1	1.07465e-105	2.56969e-101	104.969	100.59	0.342116	0.979	0.712
Mrfap1	1.11479e-105	2.66568e-101	104.953	100.574	0.323268	0.952	0.638
Wdr89	1.21085e-105	2.89538e-101	104.917	100.538	0.19356	0.727	0.434
Ubxn6	1.29006e-105	3.0848e-101	104.889	100.511	0.192951	0.524	0.291
Prelid2	1.36384e-105	3.26123e-101	104.865	100.487	0.301772	0.391	0.2
Rrp9	1.48804e-105	3.5582e-101	104.827	100.449	0.721508	0.272	0.12
Atp6v1c1	1.61169e-105	3.85388e-101	104.793	100.414	0.261465	0.904	0.593
Il3ra	2.73503e-105	6.54001e-101	104.563	100.184	0.650883	0.335	0.164
Clns1a	3.67261e-105	8.78195e-101	104.435	100.056	0.200703	0.587	0.334
Lbh	4.69558e-105	1.12281e-100	104.328	99.9497	0.341766	0.362	0.18
Bri3	5.6344e-105	1.3473e-100	104.249	99.8705	0.350249	0.979	0.743
Washc1	6.3685e-105	1.52284e-100	104.196	99.8173	0.339536	0.385	0.194
Sugt1	6.60404e-105	1.57916e-100	104.18	99.8016	0.194233	0.839	0.517
Ptger4	7.15789e-105	1.71159e-100	104.145	99.7666	1.16978	0.178	0.063
Eef2kmt	8.21438e-105	1.96422e-100	104.085	99.7068	0.22362	0.457	0.244
Rpl36	8.71045e-105	2.08284e-100	104.06	99.6813	0.311077	1	0.869
Tram1	9.50732e-105	2.27339e-100	104.022	99.6433	0.287321	0.915	0.606
Bscl2	1.00824e-104	2.4109e-100	103.996	99.6178	0.264315	0.678	0.399
Thumpd1	1.30652e-104	3.12416e-100	103.884	99.5053	0.421096	0.392	0.2
U2af1l4	1.38096e-104	3.30216e-100	103.86	99.4812	0.344354	0.446	0.237
Casp1	1.39601e-104	3.33813e-100	103.855	99.4765	0.185468	0.579	0.329
Skp1	1.68817e-104	4.03674e-100	103.773	99.394	0.229087	0.77	0.467
Eid2	1.71298e-104	4.09608e-100	103.766	99.3876	0.684522	0.245	0.103
Cetn3	1.89935e-104	4.54172e-100	103.721	99.3428	0.205398	0.84	0.514
Cinp	2.25291e-104	5.38716e-100	103.647	99.2686	0.343551	0.434	0.23
Plod1	2.56794e-104	6.14045e-100	103.59	99.2118	0.216547	0.837	0.535
Mcts2	2.67582e-104	6.39842e-100	103.573	99.1939	0.519787	0.315	0.147
Lyrm9	2.88438e-104	6.89712e-100	103.54	99.1613	0.327092	0.403	0.208
Qars	2.88934e-104	6.90899e-100	103.539	99.1606	0.297104	0.521	0.291
Rbm17	3.31957e-104	7.93775e-100	103.479	99.1003	0.22812	0.641	0.371
Snap47	3.99175e-104	9.54508e-100	103.399	99.0202	0.247937	0.377	0.191
Bcl7c	5.02462e-104	1.20149e-99	103.299	98.9203	0.272176	0.538	0.302
Ddx27	5.2952e-104	1.26619e-99	103.276	98.8975	0.253538	0.525	0.29
Rab9	5.32176e-104	1.27254e-99	103.274	98.8953	0.254299	0.508	0.282
Fam98b	6.05757e-104	1.44849e-99	103.218	98.8391	0.238675	0.525	0.29
Cib1	6.44986e-104	1.54229e-99	103.19	98.8118	0.198396	0.682	0.406
Smim27	6.87637e-104	1.64428e-99	103.163	98.784	0.194422	0.56	0.316
Nsun2	8.3419e-104	1.99471e-99	103.079	98.7001	0.154367	0.535	0.3
Supt6	9.16232e-104	2.19089e-99	103.038	98.6594	0.143667	0.646	0.375
Clpp	1.03829e-103	2.48276e-99	102.984	98.6051	0.24169	0.475	0.259
Blvrb	1.06485e-103	2.54627e-99	102.973	98.5941	0.327812	0.813	0.509
Psmd10	1.17606e-103	2.81221e-99	102.93	98.551	0.311602	0.524	0.291
Ilk	1.46077e-103	3.493e-99	102.835	98.4568	0.196792	0.696	0.412
Akr7a5	1.51805e-103	3.62997e-99	102.819	98.4401	0.372166	0.454	0.244
Psmb10	1.63652e-103	3.91324e-99	102.786	98.4075	0.20598	0.799	0.484
Eif4e	1.86299e-103	4.45478e-99	102.73	98.3512	0.177655	0.756	0.451
Fam114a1	1.96056e-103	4.6881e-99	102.708	98.329	0.0132555	0.384	0.193
Blmh	1.99401e-103	4.76807e-99	102.7	98.3217	0.109711	0.698	0.415
Mcfd2	2.01374e-103	4.81525e-99	102.696	98.3174	0.163622	0.677	0.398
Chmp1a	2.16617e-103	5.17975e-99	102.664	98.2857	0.193691	0.515	0.284
Map2k2	2.22357e-103	5.317e-99	102.653	98.2743	0.227284	0.859	0.538
Sec31a	2.59915e-103	6.21508e-99	102.585	98.2066	0.0878787	0.773	0.471
Trnau1ap	3.14721e-103	7.52561e-99	102.502	98.1235	0.260275	0.46	0.249
Ang	3.23789e-103	7.74244e-99	102.49	98.1111	0.216015	0.839	0.525
Ruvbl1	3.52007e-103	8.41719e-99	102.453	98.0748	0.231119	0.529	0.299
Praf2	3.88971e-103	9.30108e-99	102.41	98.0315	0.7416	0.266	0.118
Cmc1	3.92271e-103	9.37997e-99	102.406	98.0278	0.15563	0.753	0.453
Adk	4.51505e-103	1.07964e-98	102.345	97.9667	0.0533054	0.508	0.279
Map2k3	4.72619e-103	1.13013e-98	102.325	97.9469	0.229632	0.457	0.246
Slc37a2	4.83118e-103	1.15523e-98	102.316	97.9373	0.107968	0.724	0.434
Tigar	5.95178e-103	1.42319e-98	102.225	97.8467	0.775923	0.228	0.094
Stab1	6.64078e-103	1.58794e-98	102.178	97.7992	0.296419	0.943	0.714
Dctn2	6.91436e-103	1.65336e-98	102.16	97.7816	0.182276	0.78	0.478
Zmat5	8.58766e-103	2.05348e-98	102.066	97.6875	0.174699	0.6	0.347
Ext2	1.02265e-102	2.44536e-98	101.99	97.6117	0.018678	0.604	0.349
Ccdc59	1.12051e-102	2.67936e-98	101.951	97.572	0.158551	0.662	0.392
Ptov1	1.21089e-102	2.89549e-98	101.917	97.5383	0.269255	0.565	0.322
Sms	1.37352e-102	3.28436e-98	101.862	97.4835	0.209354	0.593	0.337
Slc31a1	1.43913e-102	3.44126e-98	101.842	97.4633	0.173636	0.569	0.324
Gfer	1.46543e-102	3.50413e-98	101.834	97.4554	0.25167	0.661	0.39
1110065P20Rik	1.94463e-102	4.65e-98	101.711	97.3325	0.391816	0.388	0.199
Tuba1a	2.13904e-102	5.11488e-98	101.67	97.2912	0.240753	0.719	0.43
Qki	2.23462e-102	5.34342e-98	101.651	97.2722	-0.63959	0.997	0.937
Txndc15	3.17542e-102	7.59306e-98	101.498	97.1196	0.176676	0.744	0.444
Tmem214	3.77669e-102	9.03082e-98	101.423	97.0443	0.225757	0.43	0.226
Washc3	4.07454e-102	9.74305e-98	101.39	97.0113	0.152913	0.705	0.42
Slc11a2	4.84415e-102	1.15833e-97	101.315	96.9362	0.31712	0.31	0.146
Ltv1	5.13388e-102	1.22761e-97	101.29	96.9109	0.382234	0.391	0.201
Acbd3	5.52332e-102	1.32074e-97	101.258	96.8792	0.159135	0.775	0.476
Txn1	6.60168e-102	1.57859e-97	101.18	96.8017	0.275577	0.954	0.668
Arl6ip5	7.073e-102	1.6913e-97	101.15	96.7718	0.169837	0.801	0.493
Tmem9	7.10427e-102	1.69877e-97	101.148	96.7699	0.574014	0.301	0.141
Cyp4v3	8.07744e-102	1.93148e-97	101.093	96.7141	0.0935973	0.566	0.322
Txndc12	9.03539e-102	2.16054e-97	101.044	96.6654	0.0942556	0.57	0.321
Dusp23	9.31419e-102	2.22721e-97	101.031	96.6522	0.796343	0.253	0.11
Acvrl1	9.47548e-102	2.26578e-97	101.023	96.6448	0.305691	0.391	0.201
Puf60	9.54899e-102	2.28335e-97	101.02	96.6414	0.191699	0.584	0.332
Plcl2	9.55582e-102	2.28499e-97	101.02	96.6411	-1.3594	0.896	0.806
Slc25a25	1.00015e-101	2.39156e-97	101	96.6213	0.23706	0.389	0.199
Rsl24d1	1.08433e-101	2.59285e-97	100.965	96.5862	0.238153	0.554	0.314
Gpatch4	1.48193e-101	3.54358e-97	100.829	96.4506	0.532606	0.337	0.166
Dda1	1.69491e-101	4.05287e-97	100.771	96.3922	0.206672	0.505	0.278
Smyd2	2.06646e-101	4.94131e-97	100.685	96.3062	0.60777	0.255	0.111
Uba52	2.88469e-101	6.89787e-97	100.54	96.1613	0.322362	0.988	0.724
G6pc3	2.90342e-101	6.94266e-97	100.537	96.1585	0.276178	0.435	0.232
Hpf1	3.01558e-101	7.21084e-97	100.521	96.142	0.2119	0.875	0.546
Yae1d1	3.55295e-101	8.49581e-97	100.449	96.0708	0.18821	0.483	0.265
Nucb1	4.05244e-101	9.69018e-97	100.392	96.0137	0.252437	0.876	0.548
Cops2	4.05815e-101	9.70386e-97	100.392	96.0131	0.0950629	0.65	0.376
4930430E12Rik	4.28899e-101	1.02558e-96	100.368	95.989	0.572346	0.311	0.147
Aasdhppt	4.7043e-101	1.12489e-96	100.328	95.9489	0.266143	0.419	0.222
Cd36	5.12495e-101	1.22548e-96	100.29	95.9117	0.414524	0.34	0.165
0610009B22Rik	5.35524e-101	1.28054e-96	100.271	95.8926	0.276345	0.552	0.315
Phf5a	6.07247e-101	1.45205e-96	100.217	95.838	0.191264	0.706	0.418
Bcl2l1	6.64108e-101	1.58801e-96	100.178	95.7991	-0.0380378	0.76	0.464
Zfp710	7.75225e-101	1.85372e-96	100.111	95.732	-1.46548	0.828	0.77
Yipf3	7.81458e-101	1.86862e-96	100.107	95.7285	0.259912	0.581	0.337
Fn1	8.46258e-101	2.02357e-96	100.072	95.6939	0.947116	0.536	0.322
Ppp1cc	8.51771e-101	2.03675e-96	100.07	95.6911	0.226373	0.89	0.568
C1qc	9.43171e-101	2.25531e-96	100.025	95.6468	0.326922	1	0.947
Psmg1	9.70603e-101	2.32091e-96	100.013	95.6343	0.38461	0.412	0.217
Smarce1	1.18559e-100	2.83499e-96	99.9261	95.5474	0.132487	0.742	0.445
Rpl22	1.19108e-100	2.84811e-96	99.9241	95.5454	0.297521	0.999	0.853
Srprb	1.34628e-100	3.21923e-96	99.8709	95.4922	0.267193	0.476	0.261
Rpl37a	1.55433e-100	3.71671e-96	99.8085	95.4298	0.276817	1	0.932
Pycr2	1.55501e-100	3.71833e-96	99.8083	95.4297	0.29832	0.448	0.241
Timm44	1.87782e-100	4.49024e-96	99.7263	95.3477	0.0779544	0.577	0.332
Adipor1	1.91215e-100	4.57234e-96	99.7185	95.3399	0.176284	0.835	0.512
Aip	2.55964e-100	6.12061e-96	99.5918	95.2132	0.200157	0.538	0.303
Cetn4	2.62209e-100	6.26995e-96	99.5814	95.2027	0.719367	0.292	0.136
Dazap2	2.82316e-100	6.75074e-96	99.5493	95.1706	0.203665	0.875	0.543
Trmt112	2.96597e-100	7.09224e-96	99.5278	95.1492	0.250083	0.883	0.563
Rpl13a	3.06263e-100	7.32337e-96	99.5139	95.1353	0.306049	1	0.887
Slc66a1	3.47275e-100	8.30403e-96	99.4593	95.0807	0.298572	0.438	0.235
Ptma	3.53681e-100	8.45722e-96	99.4514	95.0728	0.287384	0.998	0.843
Uqcrh	3.59285e-100	8.59121e-96	99.4446	95.0659	0.308439	0.991	0.746
Magoh	5.97764e-100	1.42937e-95	99.2235	94.8449	0.206784	0.659	0.385
Dnpep	6.48373e-100	1.55039e-95	99.1882	94.8096	0.362768	0.422	0.226
Arf6	6.606e-100	1.57963e-95	99.1801	94.8014	0.18024	0.542	0.306
Snw1	9.11722e-100	2.18011e-95	99.0401	94.6615	0.176497	0.765	0.459
Ctsa	9.77818e-100	2.33816e-95	99.0097	94.6311	0.331178	0.989	0.773
Tsg101	9.85924e-100	2.35754e-95	99.0062	94.6275	0.123235	0.725	0.432
Ankrd40	9.94212e-100	2.37736e-95	99.0025	94.6239	0.135958	0.645	0.379
Spag7	1.01322e-99	2.42281e-95	98.9943	94.6157	0.206603	0.643	0.38
Ube2j2	1.11758e-99	2.67235e-95	98.9517	94.5731	0.0936544	0.625	0.364
Ppan	1.15553e-99	2.76311e-95	98.9372	94.5586	0.601823	0.28	0.128
Dnajc10	1.6503e-99	3.94619e-95	98.7824	94.4038	0.16429	0.628	0.365
Serpine2	1.69701e-99	4.05789e-95	98.7703	94.3917	0.376373	0.948	0.689
Ccdc90b	1.84932e-99	4.42209e-95	98.733	94.3544	0.0820288	0.593	0.337
2210016L21Rik	2.1343e-99	5.10353e-95	98.6707	94.2921	0.296202	0.485	0.268
Prrc1	2.14707e-99	5.13408e-95	98.6682	94.2895	0.0222304	0.556	0.314
Cbr3	2.24634e-99	5.37145e-95	98.6485	94.2699	0.555348	0.306	0.146
Psmg3	2.44641e-99	5.84986e-95	98.6115	94.2329	0.379275	0.439	0.236
Ptges3	2.8293e-99	6.76543e-95	98.5483	94.1697	0.256067	0.903	0.567
Fam32a	2.97861e-99	7.12245e-95	98.526	94.1474	0.151957	0.661	0.39
Ccl6	3.57646e-99	8.55203e-95	98.4465	94.0679	0.594666	0.811	0.526
Herpud1	3.6382e-99	8.69965e-95	98.4391	94.0605	0.323049	0.677	0.407
Srxn1	4.29746e-99	1.02761e-94	98.3668	93.9882	0.723911	0.245	0.105
Copa	4.64756e-99	1.11132e-94	98.3328	93.9542	0.178737	0.862	0.56
Chrac1	5.21174e-99	1.24623e-94	98.283	93.9044	0.186525	0.671	0.397
Cpeb2	6.16662e-99	1.47456e-94	98.21	93.8313	-0.0531671	0.675	0.405
Fam3c	6.5067e-99	1.55588e-94	98.1866	93.808	0.162972	0.682	0.401
Cct4	6.81294e-99	1.62911e-94	98.1667	93.788	0.232602	0.88	0.555
Ubqln1	6.94663e-99	1.66108e-94	98.1582	93.7796	0.113218	0.624	0.366
Prpf31	7.09026e-99	1.69542e-94	98.1493	93.7707	0.215086	0.482	0.264
Magt1	8.39652e-99	2.00778e-94	98.0759	93.6973	0.258355	0.863	0.537
Pgrmc2	9.78813e-99	2.34054e-94	98.0093	93.6307	0.249687	0.554	0.317
Ahcyl1	1.05287e-98	2.51763e-94	97.9776	93.599	0.0774296	0.669	0.395
Tm2d3	1.14407e-98	2.73571e-94	97.9415	93.5629	0.214966	0.59	0.341
Ubxn4	1.17388e-98	2.80699e-94	97.9304	93.5518	0.194345	0.895	0.585
Dnajc21	1.18009e-98	2.82183e-94	97.9281	93.5495	0.127112	0.537	0.305
Gar1	1.18435e-98	2.83201e-94	97.9265	93.5479	0.384965	0.36	0.181
Psmd14	1.19255e-98	2.85163e-94	97.9235	93.5449	0.133482	0.822	0.511
Arf1	1.21267e-98	2.89975e-94	97.9163	93.5376	0.299539	0.946	0.653
Golga7	1.22445e-98	2.92791e-94	97.9121	93.5334	0.182728	0.576	0.331
Ssu72	1.27628e-98	3.05184e-94	97.8941	93.5154	0.205125	0.864	0.556
Wdr12	1.38232e-98	3.30541e-94	97.8594	93.4808	0.15664	0.496	0.275
Baiap2l2	1.54849e-98	3.70276e-94	97.8101	93.4315	1.62168	0.105	0.027
Dtymk	1.93064e-98	4.61655e-94	97.7143	93.3357	0.199522	0.632	0.364
Hnrnpa1	2.24512e-98	5.36852e-94	97.6488	93.2701	0.290696	0.937	0.629
Map1lc3a	2.62684e-98	6.28131e-94	97.5806	93.2019	0.206557	0.597	0.346
Eif3m	3.57568e-98	8.55016e-94	97.4466	93.068	0.228373	0.874	0.55
Ndufaf2	4.2931e-98	1.02657e-93	97.3672	92.9886	0.0384275	0.603	0.348
Sdf2	4.37992e-98	1.04733e-93	97.3585	92.9799	0.178061	0.69	0.413
Smpdl3a	4.58339e-98	1.09598e-93	97.3388	92.9602	0.147244	0.559	0.309
Ift27	4.91269e-98	1.17472e-93	97.3087	92.9301	0.41674	0.399	0.211
Gnpda1	5.1965e-98	1.24259e-93	97.2843	92.9057	0.157211	0.693	0.413
Ramac	5.53028e-98	1.3224e-93	97.2573	92.8786	0.165118	0.572	0.329
E230029C05Rik	6.91129e-98	1.65263e-93	97.1604	92.7818	-1.46202	0.854	0.794
Rbfa	6.97548e-98	1.66798e-93	97.1564	92.7778	0.191782	0.522	0.294
Mdn1	7.95303e-98	1.90173e-93	97.0995	92.7209	-0.0205003	0.456	0.247
Morn2	8.20066e-98	1.96094e-93	97.0862	92.7075	0.468099	0.35	0.175
Ywhae	8.45599e-98	2.022e-93	97.0728	92.6942	0.319869	0.989	0.762
Gclm	8.52283e-98	2.03798e-93	97.0694	92.6908	0.409893	0.556	0.327
Gk	9.32361e-98	2.22946e-93	97.0304	92.6518	0.302205	0.379	0.196
Ddx31	1.34164e-97	3.20813e-93	96.8724	92.4937	-0.0300537	0.506	0.282
Ndufs1	1.3432e-97	3.21185e-93	96.8719	92.4932	0.0906508	0.583	0.339
2310033P09Rik	1.39828e-97	3.34356e-93	96.8544	92.4758	0.317043	0.457	0.251
Hmgn5	1.40415e-97	3.3576e-93	96.8526	92.474	0.44373	0.421	0.225
Nherf1	1.49546e-97	3.57595e-93	96.8252	92.4466	0.286857	0.469	0.258
Tmsb10	1.52096e-97	3.63692e-93	96.8179	92.4393	0.19822	0.906	0.593
Akip1	2.15882e-97	5.16218e-93	96.6658	92.2872	0.392691	0.392	0.205
Rpl21	2.67475e-97	6.39585e-93	96.5727	92.1941	0.291573	1	0.907
H2-DMb1	2.92829e-97	7.00213e-93	96.5334	92.1548	0.147969	0.681	0.406
Grcc10	3.0361e-97	7.25992e-93	96.5177	92.1391	0.30468	0.97	0.687
Ethe1	3.30206e-97	7.89587e-93	96.4812	92.1026	0.244758	0.631	0.369
Lamtor1	3.56436e-97	8.5231e-93	96.448	92.0694	0.309907	0.947	0.639
Nudt14	3.76307e-97	8.99825e-93	96.4245	92.0458	0.419137	0.417	0.225
Plaat3	3.85692e-97	9.22266e-93	96.4138	92.0351	0.369492	0.437	0.237
Rabggtb	3.98168e-97	9.521e-93	96.3999	92.0213	0.297352	0.422	0.227
Pip4k2c	4.26666e-97	1.02024e-92	96.3699	91.9913	0.319067	0.356	0.18
Rit1	4.50243e-97	1.07662e-92	96.3466	91.9679	0.326576	0.431	0.233
Optn	4.79913e-97	1.14757e-92	96.3188	91.9402	0.574367	0.247	0.109
Timm50	5.55735e-97	1.32887e-92	96.2551	91.8765	0.295177	0.531	0.3
Snrpd1	5.89774e-97	1.41027e-92	96.2293	91.8507	0.195473	0.86	0.525
Tpgs1	5.97805e-97	1.42947e-92	96.2234	91.8448	0.237086	0.512	0.29
Armc1	6.52036e-97	1.55915e-92	96.1857	91.8071	0.0987794	0.528	0.297
Bnip3l	6.66207e-97	1.59303e-92	96.1764	91.7978	0.249779	0.86	0.561
C1galt1c1	6.69617e-97	1.60119e-92	96.1742	91.7956	0.263508	0.486	0.271
Epb41l3	7.13229e-97	1.70547e-92	96.1468	91.7682	0.0899281	0.599	0.347
Adap2	7.14413e-97	1.70831e-92	96.1461	91.7674	-1.42267	0.853	0.773
Rab21	7.14738e-97	1.70908e-92	96.1459	91.7672	0.165588	0.766	0.475
Ttc1	7.33746e-97	1.75453e-92	96.1345	91.7558	0.123396	0.572	0.329
[truncated: 7,620 more rows]

## Sheet: DE_BAM7_vs_otherBAMs_TBI
Table_S5_DEGe_BAM7_vs_otherBAMs_TBI
gene	p_val	p_val_adj	log10_p_val	log10_p_val_adj	avg_log2FC	pct.1	pct.2
Ccr2	0	0	300	300	-3.92224	0.147	0.648
Ms4a4c	0	0	300	300	-4.25507	0.139	0.59
Cd24a	0	0	300	300	1.98191	0.677	0.231
F7	0	0	300	300	2.61969	0.591	0.146
Rnf128	0	0	300	300	2.15343	0.655	0.224
Vat1	0	0	300	300	1.68822	0.861	0.436
Igf2r	0	0	300	300	1.88193	0.626	0.204
Pdpn	0	0	300	300	2.31162	0.576	0.157
Chchd10	0	0	300	300	2.27162	0.693	0.276
Adam8	0	0	300	300	1.4351	0.825	0.412
Cd36	0	0	300	300	2.07006	0.678	0.27
Gla	0	0	300	300	1.41645	0.828	0.42
Slc6a8	0	0	300	300	1.931	0.601	0.204
Mgst1	0	0	300	300	1.5917	0.799	0.404
Gpnmb	0	0	300	300	2.34624	0.944	0.553
Gclm	0	0	300	300	2.12299	0.799	0.41
Rilpl2	0	0	300	300	1.85309	0.639	0.258
Gstm1	0	0	300	300	1.66938	0.705	0.327
Emp1	0	0	300	300	1.05876	0.762	0.387
Clec4d	0	0	300	300	1.31955	0.877	0.508
S100a8	0	0	300	300	1.26883	0.631	0.263
Htr2b	0	0	300	300	2.68575	0.471	0.105
Tnfaip2	0	0	300	300	1.16337	0.798	0.434
Slc48a1	0	0	300	300	1.76781	0.835	0.477
Arg1	0	0	300	300	2.24349	0.733	0.376
Tuba4a	0	0	300	300	1.60154	0.588	0.233
Kmt5a	0	0	300	300	1.30472	0.809	0.459
Plpp3	0	0	300	300	3.61349	0.415	0.065
Airn	0	0	300	300	2.21825	0.463	0.114
Papss2	0	0	300	300	1.54706	0.555	0.207
Fabp4	0	0	300	300	3.09898	0.448	0.105
Sgk1	0	0	300	300	1.30788	0.777	0.434
Ifi203	0	0	300	300	-3.14081	0.228	0.562
Tmem176b	0	0	300	300	-2.60421	0.368	0.686
Uap1l1	0	0	300	300	1.00817	0.886	0.569
Idh1	0	0	300	300	1.11011	0.799	0.486
Myof	0	0	300	300	1.03096	0.869	0.557
Tmem176a	0	0	300	300	-2.57575	0.322	0.633
Por	0	0	300	300	0.995308	0.868	0.558
Gde1	0	0	300	300	1.18085	0.885	0.576
Tnfsf13	0	0	300	300	1.03934	0.828	0.519
Nceh1	0	0	300	300	0.969243	0.908	0.603
Txnrd1	0	0	300	300	1.50165	0.875	0.571
Ahnak2	0	0	300	300	1.99073	0.448	0.147
Mndal	0	0	300	300	-2.75206	0.319	0.615
Slc11a1	0	0	300	300	1.09696	0.861	0.576
Ninj1	0	0	300	300	1.14638	0.921	0.642
Pld3	0	0	300	300	1.14073	0.895	0.622
Epsti1	0	0	300	300	-2.05933	0.536	0.804
Ap3s1	0	0	300	300	1.01406	0.905	0.644
Atp6v1a	0	0	300	300	0.979106	0.934	0.683
Ftl1-ps1	0	0	300	300	1.34145	0.928	0.68
Grina	0	0	300	300	0.984406	0.885	0.637
Slc36a2	0	0	300	300	3.27877	0.291	0.046
Prdx6	0	0	300	300	1.4507	0.916	0.685
Capg	0	0	300	300	0.983361	0.937	0.718
Apoc2	0	0	300	300	1.02491	0.945	0.727
Pf4	0	0	300	300	1.5114	0.916	0.699
Lipa	0	0	300	300	1.28852	0.934	0.726
Arhgap15	0	0	300	300	-2.0466	0.598	0.805
Gmfg	0	0	300	300	-1.56841	0.593	0.796
Cd74	0	0	300	300	-3.62951	0.576	0.77
Syngr1	0	0	300	300	1.17487	0.963	0.772
Samhd1	0	0	300	300	-1.75052	0.618	0.79
H2-DMa	0	0	300	300	-2.03101	0.576	0.748
Aldh2	0	0	300	300	0.85826	0.921	0.756
Mef2c	0	0	300	300	-1.60876	0.632	0.794
Hmox1	0	0	300	300	2.01828	0.959	0.805
Pgam1	0	0	300	300	1.09909	0.957	0.805
Ssh2	0	0	300	300	-1.44664	0.692	0.837
Psmb5	0	0	300	300	0.929643	0.924	0.78
Aprt	0	0	300	300	0.945698	0.956	0.812
Msrb1	0	0	300	300	0.985033	0.952	0.811
Psmb6	0	0	300	300	0.834235	0.933	0.798
Plin2	0	0	300	300	1.45524	0.964	0.838
Ifngr1	0	0	300	300	-1.56803	0.73	0.852
Fabp5	0	0	300	300	2.4324	0.982	0.876
Mif	0	0	300	300	1.02327	0.967	0.867
Esd	0	0	300	300	1.38663	0.949	0.849
Cd63	0	0	300	300	1.20216	0.98	0.887
Cx3cr1	0	0	300	300	-1.56132	0.798	0.889
Ifitm3	0	0	300	300	-2.33937	0.865	0.955
Ifi27l2a	0	0	300	300	-2.05235	0.817	0.905
Pip4k2a	0	0	300	300	-1.30835	0.774	0.859
Creg1	0	0	300	300	1.57116	0.967	0.884
Anxa5	0	0	300	300	0.680949	0.954	0.874
Pkm	0	0	300	300	0.834645	0.971	0.893
Aldoa	0	0	300	300	0.851491	0.97	0.9
Txn1	0	0	300	300	1.13152	0.966	0.901
Cstb	0	0	300	300	1.03063	0.978	0.922
Lgals3	0	0	300	300	1.26701	0.98	0.924
Gpx4	0	0	300	300	0.65512	0.963	0.912
Atp6v1g1	0	0	300	300	0.767037	0.962	0.917
Ptprc	0	0	300	300	-1.28012	0.912	0.956
Akr1a1	0	0	300	300	0.663756	0.964	0.921
Ly6e	0	0	300	300	-1.46807	0.917	0.958
Lgals1	0	0	300	300	0.879271	0.971	0.93
Ly86	0	0	300	300	-1.244	0.93	0.963
Prdx1	0	0	300	300	1.42145	0.984	0.955
Cd68	0	0	300	300	0.796662	0.969	0.941
Serinc3	0	0	300	300	-1.17757	0.9	0.925
Gapdh	0	0	300	300	0.565666	0.982	0.962
Lamp1	0	0	300	300	0.669862	0.975	0.956
Spp1	0	0	300	300	2.25648	0.993	0.975
Ctsc	0	0	300	300	-1.13672	0.925	0.942
Csf1r	0	0	300	300	-1.14177	0.939	0.955
Lyn	0	0	300	300	-0.927268	0.944	0.958
Atp6v0c	0	0	300	300	0.59499	0.978	0.964
Gabarap	0	0	300	300	0.5166	0.977	0.964
Cyrib	0	0	300	300	-0.854876	0.947	0.96
Cd52	0	0	300	300	-1.39413	0.967	0.978
Coro1a	0	0	300	300	-0.976441	0.9	0.911
Rpl18	0	0	300	300	-0.544788	0.988	0.982
Rps13	0	0	300	300	-0.516765	0.99	0.985
Rack1	0	0	300	300	-0.517776	0.982	0.977
Marcks	0	0	300	300	-0.87175	0.941	0.936
Rps6	0	0	300	300	-0.538124	0.979	0.975
Rps7	0	0	300	300	-0.628887	0.988	0.984
Rps18	0	0	300	300	-0.512197	0.992	0.988
Rps4x	0	0	300	300	-0.624606	0.986	0.982
Rpl7	0	0	300	300	-0.613322	0.98	0.977
Rps27	0	0	300	300	-0.713084	0.988	0.985
Rpl34	0	0	300	300	-0.418966	0.992	0.989
Rpl21	0	0	300	300	-0.491138	0.992	0.989
Rps5	0	0	300	300	-0.62417	0.986	0.983
Rps16	0	0	300	300	-0.509582	0.993	0.99
Rps15	0	0	300	300	-0.474523	0.985	0.982
Rps24	0	0	300	300	-0.54979	0.997	0.994
Rps20	0	0	300	300	-0.492654	0.993	0.991
Rps27a	0	0	300	300	-0.490783	0.994	0.992
Rpl26	0	0	300	300	-0.48783	0.993	0.991
Ctsb	0	0	300	300	1.03709	0.997	0.995
Rpl35a	0	0	300	300	-0.538612	0.995	0.993
Rps10	0	0	300	300	-0.444761	0.991	0.989
Rpl36	0	0	300	300	-0.484846	0.984	0.982
Rpl17	0	0	300	300	-0.571335	0.987	0.985
Rpl37a	0	0	300	300	-0.472833	0.995	0.994
Rpl28	0	0	300	300	-0.477871	0.989	0.988
Ftl1	0	0	300	300	1.46936	1	0.999
Ctsd	0	0	300	300	1.01228	0.999	0.998
Rpl18a	0	0	300	300	-0.810765	0.989	0.99
Cyba	0	0	300	300	0.636559	0.981	0.982
Rpl13	0	0	300	300	-0.490108	0.995	0.994
Psap	0	0	300	300	1.13572	0.987	0.988
Rpl23	0	0	300	300	-0.419086	0.996	0.995
Rpl37	0	0	300	300	-0.55339	0.993	0.992
Rpl30	0	0	300	300	-0.459877	0.991	0.99
Rpl39	0	0	300	300	-0.549176	0.993	0.992
Cst3	0	0	300	300	-0.881827	1	1
Rplp0	0	0	300	300	-0.540946	0.985	0.985
Rpl32	0	0	300	300	-0.495418	0.994	0.994
Rps9	0	0	300	300	-0.868874	0.992	0.992
Rps11	0	0	300	300	-0.616669	0.991	0.991
Rpl13a	0	0	300	300	-0.513354	0.986	0.986
Rpl27a	0	0	300	300	-0.442902	0.993	0.993
Lyz2	0	0	300	300	0.904749	0.998	0.998
Rps29	0	0	300	300	-0.356423	0.999	0.999
Rps14	0	0	300	300	-0.640739	0.991	0.991
Fau	0	0	300	300	-0.677895	0.997	0.997
Fth1	0	0	300	300	1.28632	1	1
Tmsb4x	0	0	300	300	-0.476156	1	1
Chchd2	1.70033e-306	4.06583e-302	300	299.983	0.462272	0.977	0.959
Cd200r4	5.283e-306	1.26327e-301	300	299.948	1.52705	0.519	0.195
H2-Aa	6.99127e-305	1.67175e-300	300	299.573	-4.19858	0.33	0.599
Fam20c	2.42684e-303	5.80305e-299	299.999	298.229	1.41734	0.632	0.292
Atp6v0e	8.25921e-303	1.97494e-298	299.996	297.702	0.557642	0.965	0.921
Rpl23a	3.50139e-298	8.37252e-294	297.455	293.077	-0.494663	0.979	0.973
Fblim1	9.47351e-297	2.26531e-292	296.023	291.645	1.2263	0.669	0.329
Bst1	9.28308e-296	2.21977e-291	295.032	290.654	1.37954	0.597	0.265
Tst	2.43516e-295	5.82296e-291	294.613	290.235	2.73235	0.288	0.059
Trps1	7.11792e-295	1.70204e-290	294.148	289.769	-1.35474	0.786	0.887
Gdf15	6.13349e-294	1.46664e-289	293.212	288.834	2.2846	0.37	0.104
Rpl27	4.04231e-293	9.66598e-289	292.393	288.015	-0.418834	0.982	0.98
Pla2g7	5.30975e-293	1.26967e-288	292.275	287.896	0.781795	0.933	0.704
Ifitm2	3.56304e-292	8.51993e-288	291.448	287.07	-1.67404	0.908	0.92
Atp6v1e1	1.62671e-291	3.88978e-287	290.789	286.41	0.745842	0.939	0.816
H2-Eb1	1.75203e-291	4.18945e-287	290.756	286.378	-4.44677	0.281	0.558
Tpi1	1.11659e-285	2.66999e-281	284.952	280.573	0.872879	0.933	0.75
Eef1b2	1.1541e-285	2.75969e-281	284.938	280.559	-0.59923	0.964	0.96
Rnh1	4.72337e-285	1.12945e-280	284.326	279.947	0.706838	0.946	0.818
Ctsz	1.62509e-284	3.88592e-280	283.789	279.411	0.429822	0.986	0.983
Nme1	7.80495e-284	1.86632e-279	283.108	278.729	0.672545	0.94	0.817
Hilpda	1.20412e-283	2.87928e-279	282.919	278.541	2.41522	0.389	0.122
Acp5	3.55856e-281	8.50924e-277	280.449	276.07	1.14693	0.714	0.377
Gpc1	4.16586e-281	9.9614e-277	280.38	276.002	2.3683	0.279	0.056
Rpl10	1.68721e-280	4.03445e-276	279.773	275.394	-0.454691	0.98	0.975
Plac8	6.00586e-280	1.43612e-275	279.221	274.843	-6.04647	0.074	0.382
Ms4a6b	6.05937e-280	1.44892e-275	279.218	274.839	-1.2341	0.785	0.865
Rps3a1	6.80957e-279	1.6283e-274	278.167	273.788	-0.408164	0.988	0.985
H2-Ab1	4.39678e-276	1.05136e-271	275.357	270.978	-4.05602	0.418	0.634
2410006H16Rik	9.79577e-276	2.34236e-271	275.009	270.63	-1.92792	0.458	0.674
Rpsa	1.88627e-275	4.51044e-271	274.724	270.346	-0.500361	0.99	0.988
Mbnl1	1.05801e-274	2.52991e-270	273.976	269.597	-0.859937	0.92	0.943
Ndufc1	5.54341e-274	1.32554e-269	273.256	268.878	0.624159	0.943	0.844
Rps21	2.09303e-273	5.00486e-269	272.679	268.301	-0.372987	0.996	0.995
Ccnd3	3.84657e-271	9.19791e-267	270.415	266.036	-2.09279	0.351	0.608
Gpr183	1.02484e-268	2.45059e-264	267.989	263.611	-2.26967	0.211	0.516
4930430E12Rik	2.37934e-268	5.68949e-264	267.624	263.245	1.19804	0.642	0.31
Sqstm1	2.24637e-267	5.37153e-263	266.649	262.27	1.11163	0.85	0.594
Apoe	2.63494e-265	6.30066e-261	264.579	260.201	0.612459	1	0.999
Ecm1	4.77105e-265	1.14085e-260	264.321	259.943	0.912796	0.842	0.525
Rps12	3.38826e-264	8.102e-260	263.47	259.091	-0.382686	0.996	0.994
Runx1	1.50658e-262	3.60254e-258	261.822	257.443	-1.25969	0.749	0.826
Soat1	4.06664e-262	9.72416e-258	261.391	257.012	0.669668	0.942	0.813
Foxp1	6.95439e-259	1.66293e-254	258.158	253.779	-1.63459	0.606	0.757
Dock4	1.52535e-257	3.64741e-253	256.817	252.438	-1.01311	0.833	0.878
C77080	3.1474e-257	7.52605e-253	256.502	252.123	2.63642	0.243	0.046
Sp100	6.34535e-256	1.5173e-251	255.198	250.819	-1.70293	0.494	0.695
Lst1	6.93001e-256	1.6571e-251	255.159	250.781	-1.03887	0.88	0.912
Cyb5a	9.24929e-255	2.21169e-250	254.034	249.655	1.02212	0.874	0.704
Blvrb	5.3045e-254	1.26841e-249	253.275	248.897	0.965161	0.897	0.716
Ctsk	2.86817e-252	6.85837e-248	251.542	247.164	2.53481	0.242	0.045
Thbs1	1.05722e-251	2.52803e-247	250.976	246.597	1.02945	0.812	0.545
Gm26740	3.47329e-251	8.30532e-247	250.459	246.081	-1.3064	0.661	0.789
Card19	7.09931e-251	1.69759e-246	250.149	245.77	0.776924	0.89	0.673
Cybb	8.20084e-251	1.96099e-246	250.086	245.708	-1.34671	0.653	0.813
Kif3a	1.19624e-249	2.86045e-245	248.922	244.544	1.30054	0.573	0.268
Dnmt3l	1.32776e-249	3.17493e-245	248.877	244.498	3.05505	0.192	0.025
Rpl24	4.00989e-248	9.58845e-244	247.397	243.018	-0.407794	0.982	0.98
Actr3	7.14648e-248	1.70887e-243	247.146	242.767	-0.691729	0.938	0.947
Unc93b1	4.02096e-246	9.61491e-242	245.396	241.017	-0.670753	0.928	0.934
Sdcbp	1.57063e-245	3.75568e-241	244.804	240.425	0.476181	0.97	0.93
Dab2	5.38471e-245	1.28759e-240	244.269	239.89	-1.39992	0.79	0.847
Pld4	7.6127e-244	1.82035e-239	243.118	238.74	-0.890036	0.774	0.853
Rab7	4.92403e-243	1.17743e-238	242.308	237.929	0.595161	0.951	0.848
Elmo1	1.62028e-242	3.87441e-238	241.79	237.412	-0.889959	0.885	0.901
Parp8	3.40014e-242	8.13041e-238	241.469	237.09	-1.85375	0.379	0.615
Arg2	1.03577e-241	2.47674e-237	240.985	236.606	1.47603	0.417	0.147
Trim30a	6.66509e-241	1.59376e-236	240.176	235.798	-1.31474	0.635	0.761
Vps29	1.27956e-240	3.05968e-236	239.893	235.514	0.646253	0.93	0.776
Rplp2	2.73284e-240	6.53476e-236	239.563	235.185	-0.308671	0.993	0.99
Atp6v1c1	3.79415e-240	9.07257e-236	239.421	235.042	0.78533	0.889	0.649
Rpl9	4.49287e-239	1.07434e-234	238.347	233.969	-0.406419	0.983	0.981
Acer3	5.19722e-239	1.24276e-234	238.284	233.906	-1.37253	0.618	0.742
Ctsl	5.33185e-239	1.27495e-234	238.273	233.895	0.801365	0.981	0.926
Psmd1	1.2694e-238	3.03538e-234	237.896	233.518	0.889739	0.854	0.601
Slc27a1	2.51428e-238	6.01216e-234	237.6	233.221	1.29614	0.557	0.261
App	8.70409e-237	2.08132e-232	236.06	231.682	0.53307	0.961	0.907
Maml3	5.72616e-236	1.36924e-231	235.242	230.864	-1.31229	0.628	0.768
Iqsec1	6.10935e-236	1.46087e-231	235.214	230.835	1.17661	0.594	0.291
Mmp8	1.24044e-235	2.96615e-231	234.906	230.528	1.6312	0.415	0.151
Mef2a	1.33274e-235	3.18686e-231	234.875	230.497	-0.715424	0.939	0.933
Rps3	4.40809e-235	1.05406e-230	234.356	229.977	-0.392641	0.987	0.981
Dpp7	8.27839e-235	1.97953e-230	234.082	229.703	1.05126	0.668	0.369
Rpl10a	8.59622e-235	2.05553e-230	234.066	229.687	-0.438049	0.983	0.98
Ndufa1	3.3413e-234	7.98971e-230	233.476	229.097	0.555965	0.95	0.859
Gstm2	5.05537e-234	1.20884e-229	233.296	228.918	3.51296	0.171	0.02
Rps23	2.88147e-233	6.89017e-229	232.54	228.162	-0.324067	0.994	0.992
Dock8	5.91269e-232	1.41384e-227	231.228	226.85	-0.98105	0.818	0.848
Calm1	5.40484e-231	1.29241e-226	230.267	225.889	0.430257	0.982	0.971
Gsr	1.16475e-229	2.78515e-225	228.934	224.555	0.838417	0.769	0.48
Il1b	2.36591e-229	5.65736e-225	228.626	224.247	-3.78612	0.047	0.318
Fnip2	1.24196e-228	2.96978e-224	227.906	223.527	0.751637	0.908	0.654
Mcfd2	3.83995e-228	9.18208e-224	227.416	223.037	0.879015	0.81	0.529
Plbd1	8.11115e-228	1.93954e-223	227.091	222.712	-2.13052	0.414	0.625
Rps25	1.21868e-226	2.9141e-222	225.914	221.535	-0.345546	0.987	0.984
Gm15987	1.48433e-226	3.54934e-222	225.828	221.45	-6.10179	0.012	0.264
Fabp3	7.75341e-226	1.85399e-221	225.111	220.732	1.32292	0.476	0.203
Emp3	8.94926e-226	2.13995e-221	225.048	220.67	0.489227	0.957	0.911
Rps28	3.82419e-225	9.14439e-221	224.417	220.039	-0.313789	0.995	0.993
Bach2	3.0844e-224	7.37541e-220	223.511	219.132	-2.12728	0.299	0.553
Hebp1	3.54077e-224	8.46668e-220	223.451	219.072	0.886506	0.782	0.5
Laptm5	3.89848e-223	9.32204e-219	222.409	218.03	-0.441498	0.976	0.983
Pde4d	4.0224e-223	9.61835e-219	222.396	218.017	0.872343	0.839	0.566
Arhgap10	1.45026e-222	3.46786e-218	221.839	217.46	0.819859	0.76	0.438
Ndufs5	3.3969e-222	8.12266e-218	221.469	217.09	0.581002	0.934	0.824
Mt1	7.87488e-222	1.88304e-217	221.104	216.725	0.713452	0.969	0.881
Jarid2	5.69263e-221	1.36122e-216	220.245	215.866	-1.78229	0.429	0.647
Dtnbp1	6.5384e-221	1.56346e-216	220.185	215.806	0.685002	0.908	0.673
Ms4a6c	2.03906e-220	4.8758e-216	219.691	215.312	-0.750483	0.927	0.948
Rpl6	4.23387e-220	1.0124e-215	219.373	214.995	-0.387059	0.989	0.984
Rasgrp2	4.57547e-220	1.09409e-215	219.34	214.961	1.12964	0.521	0.234
Akirin1	7.61719e-219	1.82142e-214	218.118	213.74	0.771636	0.849	0.634
Lpcat2	1.06432e-217	2.54499e-213	216.973	212.594	-1.11665	0.661	0.761
Atp5g1	2.62327e-217	6.27276e-213	216.581	212.203	0.548212	0.953	0.879
Mthfs	3.67727e-217	8.79308e-213	216.434	212.056	0.871441	0.885	0.647
Ctsa	5.40684e-216	1.29288e-211	215.267	210.888	0.45943	0.962	0.917
Celf2	9.86713e-216	2.35943e-211	215.006	210.627	-0.890654	0.8	0.836
Rpl36a	1.44156e-215	3.44706e-211	214.841	210.463	-0.462704	0.974	0.972
Rpl8	2.36159e-215	5.64704e-211	214.627	210.248	-0.362781	0.984	0.98
Ankrd44	2.07911e-214	4.97156e-210	213.682	209.304	-1.22648	0.622	0.742
Atp6v0b	4.21152e-214	1.00706e-209	213.376	208.997	0.409282	0.967	0.937
Anxa4	7.46934e-214	1.78607e-209	213.127	208.748	0.75955	0.84	0.56
Abca9	1.55594e-213	3.72056e-209	212.808	208.429	-2.18506	0.195	0.462
Tceal9	2.05895e-212	4.92336e-208	211.686	207.308	0.853814	0.823	0.544
Ifitm6	5.22284e-212	1.24889e-207	211.282	206.903	-5.29002	0.029	0.276
Nrp2	1.14619e-211	2.74077e-207	210.941	206.562	0.770433	0.82	0.511
Ciita	1.67162e-211	3.99718e-207	210.777	206.398	-6.57753	0.007	0.244
Angptl4	2.66143e-211	6.364e-207	210.575	206.196	2.0761	0.286	0.081
Gas5	4.05218e-209	9.68956e-205	208.392	204.014	-1.01737	0.799	0.832
Foxn3	1.49895e-208	3.5843e-204	207.824	203.446	-1.16091	0.719	0.788
Cox7a2l	2.44926e-208	5.85667e-204	207.611	203.232	-0.785924	0.85	0.875
Ccnd1	3.11315e-207	7.44416e-203	206.507	202.128	-2.53567	0.18	0.436
Oasl2	1.2586e-205	3.00957e-201	204.9	200.521	-2.60951	0.189	0.45
Ifi209	2.51052e-205	6.00315e-201	204.6	200.222	-2.55406	0.261	0.506
Hck	9.02205e-205	2.15735e-200	204.045	199.666	-1.08927	0.654	0.754
Htatip2	1.1556e-204	2.76327e-200	203.937	199.559	1.00811	0.674	0.387
Gab2	3.69252e-204	8.82956e-200	203.433	199.054	-0.797398	0.912	0.922
Gngt2	1.00439e-203	2.4017e-199	202.998	198.619	0.551638	0.942	0.869
Smpdl3a	2.09375e-203	5.00658e-199	202.679	198.3	0.672508	0.881	0.701
Srxn1	9.70953e-203	2.32174e-198	202.013	197.634	1.55752	0.42	0.171
Junos	3.78777e-202	9.05732e-198	201.422	197.043	1.56649	0.423	0.173
Hexa	1.35819e-201	3.24771e-197	200.867	196.488	0.47925	0.961	0.915
Epb41l2	1.92626e-201	4.60606e-197	200.715	196.337	-0.826101	0.881	0.884
H2-K1	2.98982e-201	7.14926e-197	200.524	196.146	-0.644046	0.949	0.965
Ethe1	4.10333e-201	9.81189e-197	200.387	196.008	0.819654	0.804	0.56
Atrnl1	1.79213e-200	4.28534e-196	199.747	195.368	-1.60143	0.498	0.691
Btg2	2.0285e-200	4.85055e-196	199.693	195.314	-2.8525	0.121	0.38
Pid1	2.08561e-200	4.98712e-196	199.681	195.302	-1.06575	0.861	0.922
H2-DMb1	2.04774e-199	4.89656e-195	198.689	194.31	-2.41607	0.431	0.596
Tmem205	2.18565e-199	5.22634e-195	198.66	194.282	0.923597	0.687	0.411
Psme1	3.17597e-199	7.59438e-195	198.498	194.12	-0.719077	0.892	0.895
Plxna1	1.82641e-198	4.3673e-194	197.738	193.36	1.26061	0.443	0.185
Ptgr1	2.63676e-197	6.30502e-193	196.579	192.2	1.63538	0.512	0.259
Ighm	7.14067e-197	1.70748e-192	196.146	191.768	-1.95366	0.233	0.476
Lmna	1.50123e-196	3.58973e-192	195.824	191.445	1.01776	0.5	0.23
Dmxl2	2.07029e-196	4.95048e-192	195.684	191.305	0.956602	0.631	0.34
Srgap2	3.50924e-196	8.39129e-192	195.455	191.076	-1.04562	0.74	0.788
Cd93	4.2264e-196	1.01062e-191	195.374	190.995	0.586854	0.876	0.583
Rpl5	5.97092e-196	1.42777e-191	195.224	190.845	-0.418257	0.979	0.972
Parp14	1.1098e-195	2.65376e-191	194.955	190.576	-1.78838	0.413	0.611
Eef1a1	2.14611e-195	5.13177e-191	194.668	190.29	-0.272039	0.995	0.995
Plec	4.79102e-195	1.14563e-190	194.32	189.941	0.767573	0.749	0.455
Bambi	6.87808e-195	1.64469e-190	194.163	189.784	1.99934	0.261	0.072
Rpl19	1.65899e-194	3.96699e-190	193.78	189.402	-0.285038	0.993	0.99
Dleu2	1.66478e-194	3.98081e-190	193.779	189.4	-1.08338	0.734	0.8
Plcl1	3.48323e-194	8.32911e-190	193.458	189.079	-1.64182	0.307	0.545
Bax	4.20346e-194	1.00513e-189	193.376	188.998	0.610341	0.937	0.803
Cipc	9.32745e-194	2.23038e-189	193.03	188.652	1.25983	0.442	0.189
Cgnl1	1.73865e-192	4.15746e-188	191.76	187.381	1.2211	0.378	0.142
Kctd12	6.45952e-192	1.5446e-187	191.19	186.811	-1.05154	0.7	0.765
Uqcrb	7.44468e-192	1.78017e-187	191.128	186.75	0.46165	0.954	0.9
Cdo1	2.16158e-191	5.16877e-187	190.665	186.287	2.51764	0.244	0.065
Ckb	3.93882e-191	9.4185e-187	190.405	186.026	-0.939064	0.731	0.782
Rgs10	8.7893e-190	2.1017e-185	189.056	184.677	-0.546581	0.961	0.939
Gng11	3.26976e-189	7.81866e-185	188.485	184.107	2.27182	0.204	0.044
Sash1	3.83804e-189	9.17753e-185	188.416	184.037	0.624529	0.881	0.611
Ccr5	4.26892e-189	1.02078e-184	188.37	183.991	-1.16295	0.553	0.713
Ptprj	4.44205e-189	1.06218e-184	188.352	183.974	-0.971669	0.788	0.819
Irf2	4.37662e-188	1.04654e-183	187.359	182.98	-0.927614	0.746	0.803
Taldo1	2.26222e-187	5.40942e-183	186.645	182.267	0.649506	0.952	0.895
Npc1	4.57944e-187	1.09504e-182	186.339	181.961	0.701279	0.854	0.602
Galns	9.53089e-187	2.27903e-182	186.021	181.642	0.948195	0.603	0.331
Ifi213	1.05052e-186	2.51201e-182	185.979	181.6	-4.58305	0.033	0.259
Hivep2	7.05118e-186	1.68608e-181	185.152	180.773	-2.33343	0.301	0.528
Zfp36l2	8.04633e-186	1.92404e-181	185.094	180.716	-1.16715	0.639	0.737
Id2	1.12323e-185	2.68586e-181	184.95	180.571	0.9169	0.694	0.416
A530064D06Rik	1.48673e-185	3.55507e-181	184.828	180.449	1.58831	0.308	0.102
Cox5a	1.49245e-185	3.56874e-181	184.826	180.447	0.439618	0.956	0.896
Tspan4	1.65438e-185	3.95595e-181	184.781	180.403	0.852382	0.7	0.423
Litaf	2.85658e-185	6.83066e-181	184.544	180.166	0.599597	0.92	0.754
Stra6l	4.05226e-185	9.68978e-181	184.392	180.014	2.14953	0.207	0.046
Hmgb2	4.08922e-185	9.77814e-181	184.388	180.01	-1.18058	0.596	0.718
Zfhx3	5.48682e-185	1.31201e-180	184.261	179.882	-1.08982	0.684	0.754
Marchf1	1.09115e-184	2.60917e-180	183.962	179.583	-1.32783	0.554	0.695
Apbb1ip	2.61454e-183	6.2519e-179	182.583	178.204	-0.842721	0.834	0.849
Rnf213	8.76313e-183	2.09544e-178	182.057	177.679	-1.48014	0.493	0.659
Cyth4	3.18928e-182	7.62622e-178	181.496	177.118	-0.699799	0.846	0.871
Elob	4.26055e-182	1.01878e-177	181.371	176.992	0.392439	0.972	0.939
Cfh	4.77378e-182	1.14151e-177	181.321	176.943	-1.61751	0.495	0.639
Mocs2	4.93139e-182	1.17919e-177	181.307	176.928	0.866183	0.692	0.423
Eif3f	1.8225e-181	4.35795e-177	180.739	176.361	-0.679359	0.884	0.886
Eif1a	2.04073e-181	4.87979e-177	180.69	176.312	0.693793	0.822	0.565
Spsb4	1.05978e-180	2.53414e-176	179.975	175.596	2.07002	0.186	0.036
Rpl22	1.86275e-180	4.45422e-176	179.73	175.351	-0.336467	0.985	0.98
Rpl15	1.94738e-180	4.65659e-176	179.711	175.332	-0.327329	0.984	0.976
Rpl4	9.03789e-180	2.16114e-175	179.044	174.665	-0.443268	0.956	0.945
Lbp	2.03259e-179	4.86033e-175	178.692	174.313	1.92132	0.252	0.071
Pde3b	2.93114e-179	7.00894e-175	178.533	174.154	-1.26078	0.538	0.673
Lsp1	3.45378e-179	8.25867e-175	178.462	174.083	-1.62226	0.526	0.678
Trappc2l	5.33597e-179	1.27594e-174	178.273	173.894	0.593931	0.906	0.727
Selplg	1.52757e-178	3.65274e-174	177.816	173.437	-1.08387	0.731	0.774
Tpp1	5.41685e-178	1.29528e-173	177.266	172.888	0.586663	0.907	0.711
Rtp4	7.67275e-178	1.83471e-173	177.115	172.736	-1.93529	0.194	0.442
Abcc3	1.184e-177	2.83119e-173	176.927	172.548	0.748378	0.793	0.528
Tmcc3	1.49837e-177	3.5829e-173	176.824	172.446	-1.58018	0.498	0.645
Tcf4	2.2554e-177	5.3931e-173	176.647	172.268	-0.896201	0.771	0.812
Cd86	3.60282e-177	8.61507e-173	176.443	172.065	-1.56459	0.431	0.612
Psmb9	1.98333e-176	4.74254e-172	175.703	171.324	-1.25198	0.561	0.687
F11r	2.67185e-176	6.38893e-172	175.573	171.195	-1.33848	0.426	0.595
Ifi204	8.70794e-176	2.08224e-171	175.06	170.681	-1.58519	0.57	0.695
Lrch1	3.44774e-175	8.24424e-171	174.462	170.084	-1.16402	0.573	0.701
Fmn1	5.48822e-175	1.31234e-170	174.261	169.882	0.71191	0.789	0.501
Cox6c	9.74853e-175	2.33107e-170	174.011	169.632	0.342256	0.976	0.956
Rps15a	1.59396e-174	3.81148e-170	173.798	169.419	-0.317019	0.991	0.99
Fyb	2.67762e-174	6.40273e-170	173.572	169.194	-0.609403	0.941	0.919
Ifitm1	3.28487e-174	7.85477e-170	173.483	169.105	-4.62702	0.194	0.42
Anpep	3.92004e-174	9.37361e-170	173.407	169.028	1.514	0.326	0.119
Fcgr2b	2.67806e-173	6.40377e-169	172.572	168.194	-0.918001	0.827	0.847
Lrpap1	7.40247e-173	1.77008e-168	172.131	167.752	0.574849	0.889	0.718
Cox7a2	4.86756e-172	1.16393e-167	171.313	166.934	0.423206	0.963	0.911
Gm34084	2.30624e-171	5.51467e-167	170.637	166.258	-3.00531	0.092	0.325
Eif4a1	2.14789e-170	5.13602e-166	169.668	165.289	0.441042	0.962	0.902
Atp8a1	2.32178e-169	5.55183e-165	168.634	164.256	-1.10465	0.571	0.686
Samd9l	3.46314e-169	8.28106e-165	168.461	164.082	-2.54521	0.153	0.389
Rnasek	3.48591e-169	8.33551e-165	168.458	164.079	0.432401	0.953	0.896
Ankrd11	4.34271e-169	1.03843e-164	168.362	163.984	-0.777658	0.803	0.846
Arl11	5.57413e-169	1.33289e-164	168.254	163.875	0.70761	0.819	0.593
Cox7b	1.15492e-168	2.76165e-164	167.937	163.559	0.421191	0.96	0.917
Atp6v1d	1.54961e-168	3.70543e-164	167.81	163.431	0.566595	0.902	0.716
Pgd	1.93426e-168	4.62521e-164	167.713	163.335	0.684856	0.88	0.688
Clec4a3	2.72565e-168	6.51757e-164	167.565	163.186	-1.55833	0.454	0.63
Isg15	4.59717e-168	1.09927e-163	167.338	162.959	-2.741	0.278	0.494
Dpysl2	4.62126e-167	1.10504e-162	166.335	161.957	-1.36568	0.35	0.541
Tpt1	1.03255e-166	2.46903e-162	165.986	161.607	-0.283287	0.997	0.998
Naca	2.28778e-166	5.47053e-162	165.641	161.262	-0.373858	0.971	0.963
Klra2	7.55771e-166	1.8072e-161	165.122	160.743	-3.77982	0.074	0.294
Mir142hg	3.0518e-165	7.29746e-161	164.515	160.137	-1.32078	0.524	0.675
Tmem126a	3.08355e-165	7.37338e-161	164.511	160.132	0.700554	0.82	0.578
Tmem256	3.7602e-165	8.99138e-161	164.425	160.046	0.455988	0.944	0.87
Pir	9.44796e-165	2.2592e-160	164.025	159.646	2.45526	0.166	0.032
Ddx5	1.17509e-164	2.80988e-160	163.93	159.551	-0.421714	0.968	0.966
Fkbp2	1.52417e-164	3.64459e-160	163.817	159.438	0.512515	0.932	0.809
Tmem120a	2.81396e-164	6.72873e-160	163.551	159.172	1.0034	0.516	0.267
Selenof	5.23896e-164	1.25274e-159	163.281	158.902	0.442588	0.952	0.872
Rpl11	1.18275e-163	2.82819e-159	162.927	158.548	-0.289615	0.991	0.989
Ddhd1	6.35882e-163	1.52052e-158	162.197	157.818	0.941927	0.645	0.395
Rps26	1.17593e-162	2.81188e-158	161.93	157.551	-0.345795	0.991	0.985
Cd72	1.61482e-162	3.86135e-158	161.792	157.413	-2.68112	0.155	0.377
S1pr1	1.84768e-161	4.41817e-157	160.733	156.355	1.06256	0.522	0.277
Slc9a9	7.30337e-161	1.74638e-156	160.136	155.758	-1.11457	0.801	0.809
Comtd1	1.07821e-159	2.57822e-155	158.967	154.589	0.899243	0.601	0.344
Slfn2	1.63514e-159	3.90994e-155	158.786	154.408	-1.11384	0.716	0.785
Amdhd2	1.68143e-159	4.02063e-155	158.774	154.396	0.654698	0.81	0.551
Glmp	1.78334e-159	4.26432e-155	158.749	154.37	0.566715	0.879	0.682
Ifi207	1.83285e-159	4.38272e-155	158.737	154.358	-1.10352	0.752	0.804
Atp5mpl	2.37006e-158	5.66728e-154	157.625	153.247	0.385982	0.964	0.916
Pgk1	3.8934e-158	9.3099e-154	157.41	153.031	0.606049	0.903	0.726
Hpgd	9.57769e-158	2.29022e-153	157.019	152.64	-1.9356	0.308	0.502
Lrp12	1.177e-157	2.81445e-153	156.929	152.551	0.967467	0.561	0.312
Atp6v0d1	2.50682e-157	5.99431e-153	156.601	152.222	0.53356	0.905	0.727
Cndp2	2.83108e-157	6.76968e-153	156.548	152.169	0.533689	0.911	0.718
Tbc1d5	3.55422e-157	8.49885e-153	156.449	152.071	-0.833975	0.786	0.812
Zeb2	1.01113e-156	2.41782e-152	155.995	151.617	-0.596968	0.971	0.97
Chd9	2.26444e-156	5.41473e-152	155.645	151.266	-0.829505	0.766	0.798
Rpl7a	2.7716e-156	6.62746e-152	155.557	151.179	-0.315136	0.976	0.97
Bri3	5.2697e-156	1.26009e-151	155.278	150.9	0.387168	0.966	0.919
Rassf4	1.08015e-155	2.58284e-151	154.967	150.588	-1.49777	0.408	0.579
Sting1	2.48004e-155	5.93027e-151	154.606	150.227	-1.58159	0.343	0.524
Atp5md	2.64679e-155	6.32901e-151	154.577	150.199	0.422562	0.954	0.897
Psmb8	3.04149e-155	7.2728e-151	154.517	150.138	-0.635822	0.907	0.903
Pou2f2	7.33287e-155	1.75344e-150	154.135	149.756	-1.17168	0.555	0.663
Serpinb6a	1.21788e-154	2.91219e-150	153.914	149.536	0.787447	0.655	0.42
Ndufab1	1.37189e-154	3.28046e-150	153.863	149.484	0.542867	0.905	0.747
Rragc	6.70354e-154	1.60295e-149	153.174	148.795	0.700052	0.802	0.557
B430306N03Rik	1.61204e-153	3.85471e-149	152.793	148.414	0.85357	0.487	0.243
Cysltr1	7.81639e-153	1.86906e-148	152.107	147.728	-1.57467	0.335	0.53
Ric1	1.00629e-152	2.40625e-148	151.997	147.619	0.917599	0.573	0.323
Gpr141	1.48763e-152	3.55721e-148	151.828	147.449	-3.50313	0.052	0.255
Mpc1	2.2705e-152	5.42922e-148	151.644	147.265	0.582913	0.927	0.824
Cd33	6.50686e-152	1.55592e-147	151.187	146.808	-1.26915	0.438	0.592
Cat	1.40284e-150	3.35448e-146	149.853	145.474	1.07074	0.629	0.398
Ust	3.00165e-150	7.17756e-146	149.523	145.144	-2.93369	0.082	0.294
Uqcr11	3.03214e-150	7.25044e-146	149.518	145.14	0.411335	0.958	0.898
Nfkb1	5.04726e-150	1.2069e-145	149.297	144.918	-1.17006	0.566	0.668
Timm13	5.60084e-150	1.33927e-145	149.252	144.873	0.474607	0.928	0.8
Sem1	7.89967e-150	1.88897e-145	149.102	144.724	0.295863	0.977	0.962
Wsb2	2.24022e-149	5.35682e-145	148.65	144.271	0.91675	0.559	0.314
Slfn1	2.72422e-149	6.51415e-145	148.565	144.186	-3.33246	0.085	0.293
Ndufb8	3.02367e-149	7.2302e-145	148.519	144.141	0.433814	0.946	0.877
Flvcr1	7.59164e-149	1.81531e-144	148.12	143.741	0.965348	0.484	0.25
Niban1	2.9774e-148	7.11956e-144	147.526	143.148	-2.05819	0.247	0.456
Sgk3	4.92426e-148	1.17749e-143	147.308	142.929	-1.1187	0.546	0.67
Wasf2	5.67881e-148	1.35792e-143	147.246	142.867	-0.650902	0.831	0.83
Clec4a2	5.82357e-148	1.39253e-143	147.235	142.856	-1.67575	0.332	0.528
Slc7a11	1.06307e-147	2.54201e-143	146.973	142.595	1.47626	0.309	0.12
Ctss	1.10057e-147	2.63167e-143	146.958	142.58	0.323653	0.991	0.997
Akap13	1.76663e-147	4.22436e-143	146.753	142.374	-0.724703	0.806	0.819
P4hb	2.49865e-147	5.97477e-143	146.602	142.224	0.51343	0.929	0.805
Cd9	4.2695e-147	1.02092e-142	146.37	141.991	0.61931	0.959	0.808
Ndufa12	8.27861e-147	1.97958e-142	146.082	141.703	0.577211	0.889	0.706
Rps8	1.42963e-146	3.41854e-142	145.845	141.466	-0.255211	0.994	0.993
Mafb	1.59987e-146	3.82561e-142	145.796	141.417	0.500753	0.942	0.799
Cytip	1.89869e-146	4.54014e-142	145.722	141.343	-2.65162	0.19	0.396
Rap1gds1	7.20363e-146	1.72253e-141	145.142	140.764	-0.845676	0.743	0.767
Trim30d	2.13491e-145	5.10499e-141	144.671	140.292	-1.60329	0.316	0.513
Sh3bp5	2.70364e-145	6.46493e-141	144.568	140.189	0.736818	0.624	0.367
mt-Co1	4.94576e-145	1.18263e-140	144.306	139.927	-0.269173	0.987	0.997
Esyt1	5.17858e-145	1.2383e-140	144.286	139.907	0.607375	0.827	0.594
Fcrls	6.08273e-145	1.4545e-140	144.216	139.837	-0.960915	0.875	0.843
Capza2	2.28188e-144	5.45642e-140	143.642	139.263	-0.415606	0.957	0.946
Cebpa	3.30138e-144	7.89427e-140	143.481	139.103	0.648594	0.786	0.543
Rplp1	3.61738e-144	8.64987e-140	143.442	139.063	-0.257108	0.998	0.996
Txnip	4.75742e-144	1.13759e-139	143.323	138.944	-1.65624	0.287	0.491
Slc22a4	5.13592e-144	1.2281e-139	143.289	138.911	1.98975	0.177	0.043
Chn2	7.85495e-144	1.87828e-139	143.105	138.726	-1.95957	0.222	0.426
Irf7	8.958e-144	2.14204e-139	143.048	138.669	-2.58944	0.173	0.385
Rexo2	1.00847e-143	2.41145e-139	142.996	138.618	0.607333	0.856	0.651
Adssl1	1.03363e-143	2.47162e-139	142.986	138.607	0.636204	0.777	0.531
Tubb4b	1.26697e-143	3.02959e-139	142.897	138.519	0.792903	0.713	0.457
Iqgap1	1.61956e-143	3.87268e-139	142.791	138.412	0.482977	0.94	0.846
Tmed10	1.70519e-143	4.07745e-139	142.768	138.39	0.392677	0.95	0.887
Tgfbr1	3.6918e-143	8.82783e-139	142.433	138.054	-0.905096	0.832	0.814
Dock2	1.02727e-142	2.4564e-138	141.988	137.61	-0.539891	0.934	0.924
Lamtor2	1.22818e-142	2.93682e-138	141.911	137.532	0.438254	0.928	0.831
Exoc3l4	1.53839e-142	3.67859e-138	141.813	137.434	2.31184	0.163	0.037
Mgst2	2.34925e-142	5.61752e-138	141.629	137.25	2.7856	0.135	0.024
Gadd45a	5.52061e-141	1.32009e-136	140.258	135.879	2.12772	0.172	0.041
1700025G04Rik	7.00353e-141	1.67468e-136	140.155	135.776	-2.41814	0.136	0.346
Aifm2	7.21161e-141	1.72444e-136	140.142	135.763	1.19367	0.298	0.113
Cotl1	3.30166e-140	7.89494e-136	139.481	135.103	0.371848	0.969	0.943
Nck2	7.82649e-140	1.87147e-135	139.106	134.728	1.68834	0.18	0.045
Abca1	2.06182e-139	4.93024e-135	138.686	134.307	0.530163	0.946	0.797
Zfp710	2.62348e-139	6.27327e-135	138.581	134.203	-1.03241	0.601	0.686
Psmd8	7.33248e-139	1.75334e-134	138.135	133.756	0.516744	0.918	0.797
Sec61g	8.04729e-139	1.92427e-134	138.094	133.716	0.35549	0.965	0.946
Acaa2	8.62097e-139	2.06145e-134	138.064	133.686	0.743938	0.687	0.442
P2ry12	1.28738e-138	3.07839e-134	137.89	133.512	-1.17883	0.681	0.731
A930007I19Rik	1.4904e-137	3.56384e-133	136.827	132.448	0.943366	0.454	0.229
Sp110	1.55336e-137	3.71439e-133	136.809	132.43	-1.57609	0.342	0.518
Evi2a	3.76656e-137	9.00659e-133	136.424	132.045	-0.829646	0.71	0.747
Stat1	6.06176e-137	1.44949e-132	136.217	131.839	-1.37304	0.521	0.633
Pabpc1	6.29482e-137	1.50522e-132	136.201	131.822	-0.43203	0.934	0.919
Sephs2	7.638e-137	1.8264e-132	136.117	131.738	0.805851	0.597	0.352
Dpp4	8.29227e-137	1.98285e-132	136.081	131.703	-4.56303	0.007	0.171
Degs1	1.14673e-136	2.74206e-132	135.941	131.562	0.633887	0.758	0.521
Pfkl	1.82865e-136	4.37266e-132	135.738	131.359	0.77098	0.627	0.385
ENSMUSG00000121501	1.8955e-136	4.53251e-132	135.722	131.344	-1.82984	0.25	0.451
Lrp1	3.07296e-136	7.34807e-132	135.512	131.134	0.448808	0.951	0.85
Eef2	3.46565e-136	8.28707e-132	135.46	131.082	-0.439799	0.939	0.924
Arhgap45	4.54851e-136	1.08764e-131	135.342	130.964	-0.792644	0.735	0.779
Lhfpl2	5.40101e-136	1.29149e-131	135.268	130.889	0.608401	0.795	0.514
B2m	8.75407e-136	2.09327e-131	135.058	130.679	-0.341796	0.989	0.992
Bet1	1.07349e-135	2.56693e-131	134.969	130.591	0.687515	0.713	0.464
Clec4a1	1.08445e-135	2.59313e-131	134.965	130.586	-2.33333	0.164	0.37
Inpp5d	1.22344e-135	2.92549e-131	134.912	130.534	-0.581204	0.923	0.908
Ikzf1	1.47912e-135	3.53686e-131	134.83	130.451	-0.837566	0.728	0.762
Gas2l3	1.94518e-135	4.65131e-131	134.711	130.332	0.886201	0.466	0.238
9930111J21Rik2	2.83011e-135	6.76735e-131	134.548	130.17	-1.59465	0.294	0.48
Eno1	3.27056e-135	7.82055e-131	134.485	130.107	0.578029	0.89	0.721
Ndufb7	3.76259e-135	8.99711e-131	134.425	130.046	0.401824	0.951	0.885
Atp5k	6.75041e-135	1.61416e-130	134.171	129.792	0.390112	0.956	0.896
Bcl2a1b	2.11967e-134	5.06856e-130	133.674	129.295	0.621646	0.85	0.684
Tnfsf12	6.809e-134	1.62817e-129	133.167	128.788	0.627892	0.811	0.579
Ldha	1.33e-133	3.18028e-129	132.876	128.498	0.587074	0.94	0.841
Gbp7	2.03888e-133	4.87538e-129	132.691	128.312	-2.5638	0.116	0.317
Abcc1	3.45045e-133	8.25072e-129	132.462	128.084	0.824365	0.533	0.298
Slfn5	3.96824e-133	9.48886e-129	132.401	128.023	-1.52964	0.553	0.666
Mycbp2	6.59433e-133	1.57684e-128	132.181	127.802	-0.934598	0.693	0.737
Cd2ap	1.24478e-132	2.97652e-128	131.905	127.526	-1.13572	0.5	0.619
Gdpd1	4.94784e-132	1.18313e-127	131.306	126.927	0.963837	0.363	0.163
Mphosph8	7.53598e-132	1.802e-127	131.123	126.744	0.698092	0.723	0.483
ENSMUSG00000121485	2.59226e-131	6.1986e-127	130.586	126.208	0.646097	0.717	0.482
Rps19	2.67075e-131	6.38629e-127	130.573	126.195	-0.284954	0.991	0.985
Arpc3	3.42725e-131	8.19523e-127	130.465	126.086	0.284139	0.972	0.96
Rigi	5.51601e-131	1.31899e-126	130.258	125.88	-2.03407	0.189	0.388
Uqcc2	5.76258e-131	1.37795e-126	130.239	125.861	0.478887	0.913	0.766
Ube2m	7.32155e-131	1.75073e-126	130.135	125.757	0.536019	0.862	0.656
Slc31a2	1.16611e-130	2.78841e-126	129.933	125.555	0.797629	0.553	0.318
Anxa2	6.02277e-130	1.44016e-125	129.22	124.842	0.400358	0.913	0.766
Ndufb6	1.27297e-129	3.04393e-125	128.895	124.517	0.539655	0.863	0.676
Calm3	1.97154e-129	4.71435e-125	128.705	124.327	0.438307	0.931	0.807
Marcksl1	2.43988e-129	5.83425e-125	128.613	124.234	-2.71685	0.085	0.278
Slamf9	2.75935e-129	6.59815e-125	128.559	124.181	-2.20346	0.142	0.338
Gpr34	3.38949e-129	8.10495e-125	128.47	124.091	-1.35882	0.459	0.588
E230029C05Rik	6.05984e-129	1.44903e-124	128.218	123.839	-1.25888	0.485	0.617
Ppia	1.6073e-128	3.84338e-124	127.794	123.415	0.258184	0.99	0.981
Rpl14	2.20551e-128	5.27381e-124	127.656	123.278	-0.317555	0.978	0.972
Acot1	2.40651e-128	5.75445e-124	127.619	123.24	1.85798	0.196	0.058
Gpr137b	5.18144e-128	1.23899e-123	127.286	122.907	0.830146	0.586	0.361
Cox5b	8.34028e-128	1.99433e-123	127.079	122.7	0.380933	0.955	0.89
Ckap4	1.04595e-127	2.50107e-123	126.98	122.602	0.709023	0.609	0.367
Tmem38b	1.1864e-127	2.83692e-123	126.926	122.547	0.860636	0.457	0.239
Spi1	1.66881e-127	3.99047e-123	126.778	122.399	-0.467344	0.938	0.929
Plin3	1.69713e-127	4.05818e-123	126.77	122.392	0.734898	0.611	0.373
Fuca2	2.19425e-127	5.24689e-123	126.659	122.28	0.576194	0.784	0.567
Lamtor4	2.22423e-127	5.31858e-123	126.653	122.274	0.393514	0.94	0.861
Gng10	2.46732e-127	5.89986e-123	126.608	122.229	-0.787435	0.811	0.798
Atp6v0d2	3.55994e-127	8.51253e-123	126.449	122.07	2.87509	0.143	0.031
Rpl12	4.80804e-127	1.1497e-122	126.318	121.939	-0.322547	0.986	0.981
Phf11b	5.30096e-127	1.26757e-122	126.276	121.897	-2.10553	0.235	0.423
Lifr	5.72187e-127	1.36821e-122	126.242	121.864	-2.63116	0.087	0.277
Baz2b	1.69576e-126	4.0549e-122	125.771	121.392	-0.843141	0.723	0.771
Ptpn18	1.90506e-126	4.55538e-122	125.72	121.341	-0.436964	0.937	0.939
Nme2	3.13176e-126	7.48866e-122	125.504	121.126	0.282492	0.973	0.958
Rex1bd	3.26935e-126	7.81767e-122	125.486	121.107	0.536832	0.865	0.68
Bbln	3.3935e-126	8.11453e-122	125.469	121.091	0.75194	0.603	0.361
Lamtor3	6.53962e-126	1.56375e-121	125.184	120.806	0.590287	0.782	0.553
Cenpb	8.33557e-126	1.9932e-121	125.079	120.7	0.62681	0.788	0.547
Ehd4	1.86917e-125	4.46956e-121	124.728	120.35	-0.86289	0.782	0.784
Osbpl8	1.97553e-125	4.7239e-121	124.704	120.326	0.556157	0.902	0.713
Klrd1	2.533e-125	6.0569e-121	124.596	120.218	-7.00245	0.009	0.161
Bola2	3.21586e-125	7.68977e-121	124.493	120.114	0.455508	0.93	0.819
Tex264	9.89357e-125	2.36575e-120	124.005	119.626	0.701933	0.612	0.376
Ndufb2	9.97673e-125	2.38564e-120	124.001	119.622	0.477261	0.898	0.756
Ly9	2.25212e-124	5.38526e-120	123.647	119.269	0.67843	0.635	0.397
Fgd2	5.37973e-124	1.2864e-119	123.269	118.891	-1.32364	0.365	0.519
Mmp27	7.05913e-124	1.68798e-119	123.151	118.773	1.42134	0.228	0.078
H2az1	1.2898e-123	3.08416e-119	122.889	118.511	-0.511047	0.969	0.959
Akr1b8	2.06704e-123	4.94271e-119	122.685	118.306	1.7199	0.182	0.052
Pno1	3.67681e-123	8.79199e-119	122.435	118.056	0.753618	0.581	0.345
Hpse	5.60786e-123	1.34095e-118	122.251	117.873	0.762075	0.525	0.294
Lilrb4b	1.10162e-122	2.63419e-118	121.958	117.579	0.507601	0.77	0.528
Lrrc59	1.8405e-122	4.401e-118	121.735	117.356	0.629549	0.742	0.498
Ctnnd2	2.2657e-122	5.41775e-118	121.645	117.266	-3.01795	0.021	0.179
Atf3	2.54396e-122	6.08313e-118	121.594	117.216	0.993727	0.477	0.266
Psma3	2.57281e-122	6.15209e-118	121.59	117.211	0.443248	0.931	0.837
Nagk	3.20744e-122	7.66963e-118	121.494	117.115	0.624558	0.709	0.47
Map1lc3b	6.32114e-122	1.51151e-117	121.199	116.821	0.417071	0.941	0.847
Nsa2	7.07529e-122	1.69184e-117	121.15	116.772	-0.511028	0.906	0.893
Rab20	8.17198e-122	1.95408e-117	121.088	116.709	0.618361	0.61	0.366
Dad1	8.90095e-122	2.1284e-117	121.051	116.672	0.372112	0.949	0.871
Neu1	1.7781e-121	4.25179e-117	120.75	116.371	0.615026	0.696	0.462
Ifi211	2.34548e-121	5.60851e-117	120.63	116.251	-2.25952	0.207	0.395
Cd38	2.5156e-121	6.0153e-117	120.599	116.221	0.553456	0.656	0.418
Maf	3.45331e-121	8.25755e-117	120.462	116.083	-0.936836	0.878	0.822
Diaph2	3.47983e-121	8.32097e-117	120.458	116.08	-0.576736	0.904	0.9
Tmem65	5.62796e-121	1.34576e-116	120.25	115.871	0.611515	0.719	0.477
Rtn1	1.21791e-120	2.91228e-116	119.914	115.536	-2.02768	0.123	0.313
Apobec3	1.2187e-120	2.91415e-116	119.914	115.535	-1.38236	0.377	0.52
Fcgr1	4.17e-120	9.9713e-116	119.38	115.001	-0.769579	0.831	0.84
Mrtfb	6.43804e-120	1.53947e-115	119.191	114.813	0.813788	0.48	0.264
Fcho2	6.82572e-120	1.63217e-115	119.166	114.787	-0.845038	0.714	0.747
Lrrc27	8.75654e-120	2.09386e-115	119.058	114.679	1.81268	0.192	0.06
Romo1	1.56255e-119	3.73637e-115	118.806	114.428	0.415386	0.935	0.822
Rbm39	1.89892e-119	4.54069e-115	118.721	114.343	-0.371762	0.957	0.954
Xaf1	4.82306e-119	1.15329e-114	118.317	113.938	-1.50737	0.29	0.469
Pde4b	5.31272e-119	1.27038e-114	118.275	113.896	-2.42811	0.076	0.256
Naglu	1.19237e-118	2.85121e-114	117.924	113.545	0.67657	0.678	0.439
Ppp3ca	1.3411e-118	3.20683e-114	117.873	113.494	-0.672066	0.824	0.82
Hmgb1	2.07752e-118	4.96776e-114	117.682	113.304	-0.415425	0.948	0.925
Il6ra	2.20438e-118	5.27112e-114	117.657	113.278	-1.08946	0.498	0.613
Ak6	2.72735e-118	6.52165e-114	117.564	113.186	0.681962	0.657	0.415
Ifi206	2.85563e-118	6.82838e-114	117.544	113.166	-3.72242	0.032	0.192
Cxcl14	3.62064e-118	8.65768e-114	117.441	113.063	1.36444	0.358	0.177
Dap	3.80474e-118	9.09788e-114	117.42	113.041	0.593483	0.765	0.544
Ccnd2	4.53519e-118	1.08446e-113	117.343	112.965	-3.46513	0.013	0.163
Zeb1	5.25228e-118	1.25592e-113	117.28	112.901	-1.64768	0.175	0.365
Cln5	5.99428e-118	1.43335e-113	117.222	112.844	0.658045	0.654	0.42
Ppfia4	1.49773e-117	3.58137e-113	116.825	112.446	-1.35446	0.333	0.485
Btg1	1.54263e-117	3.68873e-113	116.812	112.433	-0.940063	0.742	0.785
Arhgap30	1.94175e-117	4.64311e-113	116.712	112.333	-0.767881	0.715	0.758
Pqlc3	2.03336e-117	4.86217e-113	116.692	112.313	0.793728	0.441	0.232
Filip1l	2.97643e-117	7.11725e-113	116.526	112.148	-1.64923	0.224	0.415
Dapp1	3.27927e-117	7.8414e-113	116.484	112.106	-1.51494	0.333	0.493
Txndc17	4.16367e-117	9.95617e-113	116.381	112.002	0.407203	0.928	0.822
Cox7a1	1.29805e-116	3.10389e-112	115.887	111.508	1.17606	0.317	0.142
Aif1	1.59922e-116	3.82406e-112	115.796	111.417	-0.471472	0.965	0.931
Mir99ahg	2.98065e-116	7.12733e-112	115.526	111.147	-1.4757	0.321	0.482
Axl	4.67161e-116	1.11708e-111	115.331	110.952	-2.03033	0.207	0.39
Ptpro	8.12126e-116	1.94196e-111	115.09	110.712	-1.81268	0.177	0.363
Atp5j	8.1497e-116	1.94876e-111	115.089	110.71	0.339391	0.962	0.913
Renbp	1.14121e-115	2.72886e-111	114.943	110.564	0.527854	0.804	0.565
Mdga1	1.24414e-115	2.97498e-111	114.905	110.527	1.76378	0.179	0.053
Pbdc1	2.21788e-115	5.30339e-111	114.654	110.275	0.612407	0.662	0.417
Sgpl1	2.5187e-115	6.02272e-111	114.599	110.22	0.45873	0.904	0.744
Tcirg1	3.00421e-115	7.18366e-111	114.522	110.144	0.506417	0.839	0.641
Eepd1	4.30756e-115	1.03002e-110	114.366	109.987	0.717146	0.515	0.293
Stx16	9.49511e-115	2.27047e-110	114.023	109.644	-1.09313	0.578	0.656
Nfic	1.06272e-114	2.54118e-110	113.974	109.595	0.530345	0.838	0.629
Wwp1	1.07199e-114	2.56334e-110	113.97	109.591	0.338038	0.802	0.579
Lyst	1.975e-114	4.72261e-110	113.704	109.326	0.547425	0.733	0.497
I830077J02Rik	2.58254e-114	6.17537e-110	113.588	109.209	-1.75157	0.145	0.331
Rbx1	3.89487e-114	9.31342e-110	113.41	109.031	0.35324	0.954	0.899
Aga	5.07143e-114	1.21268e-109	113.295	108.916	0.679157	0.617	0.386
Ugp2	7.67196e-114	1.83452e-109	113.115	108.736	0.631511	0.782	0.572
Ybx1	1.00283e-113	2.39797e-109	112.999	108.62	0.305165	0.968	0.948
Rnase6	1.17151e-113	2.80131e-109	112.931	108.553	-3.72057	0.036	0.194
Tmem165	1.53021e-113	3.65904e-109	112.815	108.437	0.625953	0.749	0.535
Clec12a	2.17582e-113	5.20281e-109	112.662	108.284	-2.15892	0.188	0.372
Gnptab	2.4865e-113	5.94571e-109	112.604	108.226	0.632383	0.671	0.437
Ldlrad4	4.67591e-113	1.1181e-108	112.33	107.952	-1.04013	0.568	0.652
Atp5j2	5.2381e-113	1.25253e-108	112.281	107.902	0.296655	0.973	0.941
Plekhm1	5.25227e-113	1.25592e-108	112.28	107.901	0.791868	0.486	0.274
Rbpj	6.71835e-113	1.60649e-108	112.173	107.794	-1.2683	0.775	0.802
Evi2b	8.24083e-113	1.97055e-108	112.084	107.705	-1.18253	0.509	0.62
Ywhah	1.27772e-112	3.05528e-108	111.894	107.515	-0.657836	0.873	0.84
Il18bp	1.46944e-112	3.51372e-108	111.833	107.454	1.12284	0.352	0.17
Aftph	5.22693e-112	1.24986e-107	111.282	106.903	-0.985536	0.549	0.642
Arl6ip1	7.0254e-112	1.67991e-107	111.153	106.775	0.372856	0.95	0.876
Lrrk1	9.69699e-112	2.31874e-107	111.013	106.635	-1.21526	0.406	0.546
Tspan13	1.07005e-111	2.55871e-107	110.971	106.592	-1.94252	0.16	0.34
Ccl9	1.99834e-111	4.77844e-107	110.699	106.321	-0.967094	0.467	0.625
Yif1b	5.1003e-111	1.21958e-106	110.292	105.914	0.553378	0.741	0.51
Htr7	1.08551e-110	2.59568e-106	109.964	105.586	-5.89554	0.007	0.143
Herc6	1.39251e-110	3.32977e-106	109.856	105.478	-1.98495	0.233	0.408
Dennd4a	2.21234e-110	5.29015e-106	109.655	105.277	-1.16753	0.408	0.537
Vim	2.3146e-110	5.53467e-106	109.636	105.257	0.295157	0.951	0.867
Gm47428	3.0486e-110	7.28981e-106	109.516	105.137	1.28755	0.232	0.086
Atp1a3	3.21533e-110	7.68849e-106	109.493	105.114	0.582228	0.589	0.355
Rab7b	3.33601e-110	7.97708e-106	109.477	105.098	0.544583	0.688	0.449
Gm20658	5.17803e-110	1.23817e-105	109.286	104.907	2.21606	0.126	0.028
Fuom	1.52387e-109	3.64387e-105	108.817	104.438	0.931027	0.447	0.247
Inpp4b	1.80178e-109	4.30841e-105	108.744	104.366	-1.20935	0.483	0.587
Rab5if	2.82691e-109	6.75972e-105	108.549	104.17	0.421201	0.907	0.788
Uqcrq	2.99936e-109	7.17207e-105	108.523	104.144	0.317149	0.964	0.919
Bsg	3.5813e-109	8.5636e-105	108.446	104.067	0.423259	0.949	0.851
Galnt6	8.27853e-109	1.97956e-104	108.082	103.703	0.7369	0.421	0.221
Fyn	1.25982e-108	3.01249e-104	107.9	103.521	-2.10917	0.196	0.375
Ednrb	1.27891e-108	3.05814e-104	107.893	103.515	0.689762	0.313	0.139
Bnip3	1.65725e-108	3.96281e-104	107.781	103.402	0.964531	0.528	0.325
Pde7b	1.96141e-108	4.69012e-104	107.707	103.329	-2.33856	0.267	0.433
Slc41a2	2.13245e-108	5.09912e-104	107.671	103.293	1.02816	0.288	0.123
Gsto1	2.40036e-108	5.73975e-104	107.62	103.241	0.575619	0.723	0.507
Mtln	8.04156e-108	1.9229e-103	107.095	102.716	0.557287	0.747	0.533
Nus1	8.06842e-108	1.92932e-103	107.093	102.715	0.624526	0.665	0.446
Epas1	8.68508e-108	2.07678e-103	107.061	102.683	1.89506	0.147	0.039
Bnip3l	2.71836e-107	6.50014e-103	106.566	102.187	0.597494	0.818	0.631
Fnbp1	3.52262e-107	8.4233e-103	106.453	102.075	-0.749152	0.77	0.79
Bola3	3.90981e-107	9.34914e-103	106.408	102.029	0.603348	0.681	0.445
Plcl2	4.27264e-107	1.02167e-102	106.369	101.991	-0.765021	0.697	0.739
Srp14	5.59328e-107	1.33747e-102	106.252	101.874	0.385544	0.936	0.842
Emilin1	7.51034e-107	1.79587e-102	106.124	101.746	0.870699	0.369	0.184
Wnk1	9.90609e-107	2.36875e-102	106.004	101.625	-0.553584	0.868	0.858
Olfm1	1.01044e-106	2.41617e-102	105.995	101.617	-2.08675	0.181	0.357
Mcoln3	2.41344e-106	5.77101e-102	105.617	101.239	2.08402	0.143	0.037
Gba	7.27417e-106	1.7394e-101	105.138	100.76	0.614998	0.705	0.477
Selenos	8.07288e-106	1.93039e-101	105.093	100.714	0.445917	0.899	0.736
Tatdn2	2.10545e-105	5.03455e-101	104.677	100.298	0.871918	0.4	0.211
Gaa	2.86649e-105	6.85434e-101	104.543	100.164	0.666836	0.61	0.388
Tgfbi	4.17116e-105	9.97407e-101	104.38	100.001	-0.820164	0.849	0.887
Oas2	8.57173e-105	2.04967e-100	104.067	99.6883	-2.87422	0.053	0.211
Cask	1.04772e-104	2.50532e-100	103.98	99.6011	-1.37129	0.343	0.497
Tln1	1.28743e-104	3.0785e-100	103.89	99.5117	-0.415973	0.94	0.933
Ifit3	1.429e-104	3.41702e-100	103.845	99.4664	-3.07169	0.08	0.243
Psmd7	1.49123e-104	3.56584e-100	103.826	99.4478	0.549216	0.816	0.604
Bhlhe40	2.19309e-104	5.24412e-100	103.659	99.2803	0.620962	0.426	0.224
Gm20559	2.27156e-104	5.43176e-100	103.644	99.2651	-2.71576	0.058	0.217
Slfn8	2.48739e-104	5.94784e-100	103.604	99.2256	-1.57762	0.242	0.42
Cd244a	1.27504e-103	3.04888e-99	102.894	98.5159	-2.32376	0.121	0.293
Coq7	1.49344e-103	3.5711e-99	102.826	98.4472	0.79225	0.489	0.283
Ccdc12	1.5424e-103	3.68818e-99	102.812	98.4332	-0.639049	0.846	0.836
Mcee	1.64243e-103	3.92739e-99	102.785	98.4059	0.58929	0.704	0.477
Ifi27	1.90267e-103	4.54967e-99	102.721	98.342	0.707574	0.719	0.51
Bach2os	2.41546e-103	5.77584e-99	102.617	98.2384	0.66152	0.578	0.362
Rpl29	3.76416e-103	9.00086e-99	102.424	98.0457	-0.279231	0.972	0.97
Kdm7a	3.85106e-103	9.20866e-99	102.414	98.0358	-0.91384	0.62	0.688
Spint1	5.42182e-103	1.29647e-98	102.266	97.8872	-2.08652	0.137	0.308
Gga2	6.02201e-103	1.43998e-98	102.22	97.8416	0.7311	0.492	0.288
Sgms2	6.77563e-103	1.62019e-98	102.169	97.7904	0.972541	0.217	0.08
Mindy1	1.12245e-102	2.68401e-98	101.95	97.5712	0.761238	0.392	0.203
Enpp1	1.21158e-102	2.89713e-98	101.917	97.538	0.686901	0.543	0.328
Rpl35	1.61241e-102	3.8556e-98	101.793	97.4139	-0.293893	0.975	0.968
Rxra	1.86952e-102	4.47041e-98	101.728	97.3497	0.661148	0.461	0.261
Ndufa5	2.23915e-102	5.35426e-98	101.65	97.2713	0.457486	0.878	0.718
Ifi47	4.71411e-102	1.12724e-97	101.327	96.948	-2.71363	0.079	0.239
St8sia4	1.26165e-101	3.01687e-97	100.899	96.5204	-2.12855	0.183	0.357
Cttnbp2nl	1.33658e-101	3.19604e-97	100.874	96.4954	-0.759953	0.652	0.69
Prdx5	1.82585e-101	4.36597e-97	100.739	96.3599	0.263727	0.957	0.926
Ap5s1	1.94699e-101	4.65565e-97	100.711	96.332	0.905889	0.338	0.167
Zranb3	2.01473e-101	4.81762e-97	100.696	96.3172	1.12508	0.315	0.153
Vapa	3.83007e-101	9.15847e-97	100.417	96.0382	0.402753	0.933	0.821
Ly6a	6.14172e-101	1.46861e-96	100.212	95.8331	-3.78604	0.079	0.237
Lgmn	7.15095e-101	1.70993e-96	100.146	95.767	0.304102	0.986	0.97
Niban2	9.10874e-101	2.17808e-96	100.041	95.6619	0.478576	0.634	0.398
Cbfa2t3	1.06189e-100	2.53918e-96	99.9739	95.5953	-2.52884	0.116	0.281
Prkce	3.25702e-100	7.78818e-96	99.4872	95.1086	-1.85053	0.182	0.353
Gm15943	4.07986e-100	9.75575e-96	99.3894	95.0107	1.83042	0.147	0.041
Il7r	6.6707e-100	1.5951e-95	99.1758	94.7972	1.0495	0.427	0.243
Bmp2k	8.12286e-100	1.94234e-95	99.0903	94.7117	-0.656502	0.793	0.772
Slc3a2	1.16484e-99	2.78535e-95	98.9337	94.5551	0.46588	0.896	0.721
Limd2	3.52259e-99	8.42322e-95	98.4531	94.0745	-0.902643	0.587	0.645
Cd300lf	4.45048e-99	1.0642e-94	98.3516	93.973	0.520216	0.703	0.473
Atp6v1f	5.79746e-99	1.38629e-94	98.2368	93.8581	0.320888	0.961	0.913
Oaz1	7.32776e-99	1.75221e-94	98.135	93.7564	0.242424	0.977	0.958
Serf2	7.9191e-99	1.89362e-94	98.1013	93.7227	0.199888	0.984	0.978
Ubb	1.24085e-98	2.96713e-94	97.9063	93.5277	0.271745	0.979	0.958
Pros1	2.87359e-98	6.87133e-94	97.5416	93.163	-1.20499	0.356	0.483
Mocos	4.14322e-98	9.90728e-94	97.3827	93.004	1.12638	0.243	0.099
Flt3	5.53205e-98	1.32282e-93	97.2571	92.8785	-5.23108	0.005	0.125
Dhrs9	7.02461e-98	1.67972e-93	97.1534	92.7748	1.88843	0.146	0.042
Snx27	7.14975e-98	1.70965e-93	97.1457	92.7671	0.62023	0.667	0.445
Tuba1c	7.54302e-98	1.80369e-93	97.1225	92.7438	0.524841	0.761	0.542
Hint1	9.42778e-98	2.25437e-93	97.0256	92.647	0.305713	0.967	0.931
Nrip1	1.09763e-97	2.62465e-93	96.9595	92.5809	-1.03325	0.47	0.575
Tbcb	1.52465e-97	3.64573e-93	96.8168	92.4382	0.41432	0.906	0.759
Ifit2	1.53444e-97	3.66914e-93	96.8141	92.4354	-3.5134	0.054	0.202
Creb5	1.64297e-97	3.92868e-93	96.7844	92.4058	-2.73027	0.053	0.203
Tmem87b	1.88922e-97	4.5175e-93	96.7237	92.3451	0.519382	0.693	0.456
Wdr91	2.19601e-97	5.25111e-93	96.6584	92.2797	0.807009	0.383	0.202
Bhlhe41	4.84153e-97	1.15771e-92	96.315	91.9364	0.685019	0.581	0.368
Ndufb9	5.08658e-97	1.2163e-92	96.2936	91.915	0.361739	0.945	0.872
Mrps36	5.45268e-97	1.30384e-92	96.2634	91.8848	0.502649	0.787	0.582
Ptrh1	5.8008e-97	1.38709e-92	96.2365	91.8579	1.63972	0.178	0.061
Timp2	6.3673e-97	1.52255e-92	96.196	91.8174	0.429084	0.931	0.801
Ube2l3	7.3179e-97	1.74986e-92	96.1356	91.757	0.358145	0.933	0.838
Mrps28	7.5602e-97	1.80779e-92	96.1215	91.7429	0.494748	0.739	0.514
Spon1	1.12965e-96	2.70122e-92	95.9471	91.5684	-4.47185	0.012	0.137
Slco2b1	1.14631e-96	2.74106e-92	95.9407	91.5621	-1.24603	0.349	0.485
Ap2s1	1.39654e-96	3.33941e-92	95.8549	91.4763	0.37008	0.918	0.788
Mrpl51	1.42982e-96	3.41898e-92	95.8447	91.4661	0.479233	0.84	0.636
Atp5g3	1.48136e-96	3.54223e-92	95.8293	91.4507	0.418096	0.917	0.778
Picalm	1.53324e-96	3.66629e-92	95.8144	91.4358	-0.430065	0.93	0.92
Stmp1	3.00818e-96	7.19317e-92	95.5217	91.1431	0.451378	0.859	0.695
Surf4	3.44219e-96	8.23096e-92	95.4632	91.0845	0.494409	0.831	0.642
Ap1s1	4.1116e-96	9.83167e-92	95.386	91.0074	0.541443	0.684	0.468
Rreb1	6.3608e-96	1.52099e-91	95.1965	90.8179	-0.588546	0.894	0.863
Slc37a2	8.33072e-96	1.99204e-91	95.0793	90.7007	0.543465	0.746	0.526
Jmjd1c	9.80637e-96	2.3449e-91	95.0085	90.6299	-0.678788	0.758	0.758
Zfas1	1.03172e-95	2.46705e-91	94.9864	90.6078	-1.43507	0.311	0.458
Aldh3b1	1.32262e-95	3.16265e-91	94.8786	90.4999	0.527754	0.605	0.383
Psmd2	3.74906e-95	8.96476e-91	94.4261	90.0475	0.469984	0.834	0.65
Ppib	4.7635e-95	1.13905e-90	94.3221	89.9435	0.297273	0.96	0.926
Casp4	6.10366e-95	1.45951e-90	94.2144	89.8358	-2.12436	0.122	0.286
Stk17b	6.67831e-95	1.59692e-90	94.1753	89.7967	-1.41947	0.363	0.502
Itgb7	7.81792e-95	1.86942e-90	94.1069	89.7283	-2.29997	0.089	0.248
Igsf8	1.02565e-94	2.45252e-90	93.989	89.6104	0.586701	0.624	0.414
Zswim6	1.37994e-94	3.29971e-90	93.8601	89.4815	-0.792192	0.786	0.789
Lamtor5	2.00999e-94	4.80628e-90	93.6968	89.3182	0.404061	0.896	0.744
Spcs2	2.32737e-94	5.5652e-90	93.6331	89.2545	0.350887	0.943	0.86
Ostf1	3.039e-94	7.26686e-90	93.5173	89.1387	0.308063	0.952	0.905
Plxdc2	3.11176e-94	7.44083e-90	93.507	89.1284	-1.22366	0.565	0.628
Tacc1	3.8345e-94	9.16906e-90	93.4163	89.0377	-0.684863	0.732	0.751
Kmo	4.14983e-94	9.92307e-90	93.382	89.0034	-5.56813	0.005	0.122
Smagp	4.55697e-94	1.08966e-89	93.3413	88.9627	-1.96311	0.155	0.322
Ptgfrn	5.03256e-94	1.20338e-89	93.2982	88.9196	0.773761	0.393	0.215
Tmed2	9.94968e-94	2.37917e-89	93.0022	88.6236	0.394475	0.906	0.766
Slc25a51	1.50032e-93	3.58757e-89	92.8238	88.4452	0.585686	0.522	0.315
Tubb6	1.6871e-93	4.03419e-89	92.7729	88.3942	0.672303	0.517	0.315
Rusc2	2.05866e-93	4.92267e-89	92.6864	88.3078	0.978977	0.325	0.164
Zbp1	4.70479e-93	1.12501e-88	92.3275	87.9488	-1.56455	0.343	0.487
Sod2	6.49452e-93	1.55297e-88	92.1875	87.8088	0.466312	0.793	0.588
H2-Oa	7.77546e-93	1.85927e-88	92.1093	87.7307	-3.51155	0.038	0.174
Samsn1	1.38179e-92	3.30414e-88	91.8596	87.4809	-1.15226	0.434	0.535
Gnai2	3.06305e-92	7.32437e-88	91.5138	87.1352	-0.248807	0.967	0.955
Cox6b1	3.72038e-92	8.89618e-88	91.4294	87.0508	0.254456	0.973	0.952
Smap2	5.58579e-92	1.33567e-87	91.2529	86.8743	-0.713975	0.716	0.715
Pygl	6.02073e-92	1.43968e-87	91.2204	86.8417	0.5595	0.59	0.377
Cfl1	6.27296e-92	1.49999e-87	91.2025	86.8239	0.228299	0.979	0.969
Tomm6	6.29253e-92	1.50467e-87	91.2012	86.8226	0.346443	0.947	0.864
Pag1	7.66511e-92	1.83288e-87	91.1155	86.7369	-0.930238	0.566	0.63
Cox6a1	1.93776e-91	4.63358e-87	90.7127	86.3341	0.334907	0.94	0.867
Eif2ak2	2.20208e-91	5.26562e-87	90.6572	86.2786	-1.1906	0.389	0.515
Lnpep	2.3871e-91	5.70803e-87	90.6221	86.2435	-0.763596	0.689	0.723
Psma2	2.81287e-91	6.72612e-87	90.5509	86.1722	0.381641	0.925	0.82
Impdh1	5.68343e-91	1.35902e-86	90.2454	85.8668	1.21455	0.217	0.087
BC031181	6.53486e-91	1.56262e-86	90.1848	85.8061	0.466518	0.85	0.669
Ufm1	7.81146e-91	1.86788e-86	90.1073	85.7287	0.465657	0.784	0.576
Siglece	8.53858e-91	2.04175e-86	90.0686	85.69	-2.34305	0.054	0.197
Pik3ap1	9.72221e-91	2.32478e-86	90.0122	85.6336	-0.673391	0.741	0.742
Nherf1	9.74831e-91	2.33102e-86	90.0111	85.6325	0.568018	0.612	0.396
Psmd12	1.01064e-90	2.41665e-86	89.9954	85.6168	0.503663	0.835	0.634
Pan3	1.06676e-90	2.55084e-86	89.9719	85.5933	-0.860712	0.584	0.645
Rpl38	2.25042e-90	5.38121e-86	89.6477	85.2691	-0.223148	0.991	0.989
Ivns1abp	4.19481e-90	1.00306e-85	89.3773	84.9987	-0.860125	0.52	0.599
AW112010	4.2481e-90	1.01581e-85	89.3718	84.9932	-2.09374	0.22	0.377
Arid4a	5.89375e-90	1.40931e-85	89.2296	84.851	-0.998005	0.48	0.579
Cd84	6.03932e-90	1.44412e-85	89.219	84.8404	0.351336	0.933	0.787
2810001A02Rik	1.25868e-89	3.00976e-85	88.9001	84.5215	0.486753	0.812	0.606
Pak1	1.28595e-89	3.07497e-85	88.8908	84.5122	-1.52281	0.24	0.396
Traf1	1.93851e-89	4.63537e-85	88.7125	84.3339	-5.02472	0.007	0.12
Nop53	2.52763e-89	6.04407e-85	88.5973	84.2187	-0.909401	0.598	0.657
Rap2b	3.13852e-89	7.50483e-85	88.5033	84.1247	0.413519	0.833	0.633
Pebp1	3.29904e-89	7.88867e-85	88.4816	84.103	0.425828	0.91	0.762
Gclc	3.38434e-89	8.09264e-85	88.4705	84.0919	0.816965	0.5	0.311
Ttyh2	7.47684e-89	1.78786e-84	88.1263	83.7477	1.12545	0.278	0.133
Bin2	8.35634e-89	1.99817e-84	88.078	83.6994	-0.691622	0.708	0.715
Gramd1b	8.93544e-89	2.13664e-84	88.0489	83.6703	0.544018	0.651	0.435
Cerk	9.93304e-89	2.37519e-84	88.0029	83.6243	0.380797	0.903	0.725
Fli1	1.00949e-88	2.4139e-84	87.9959	83.6173	-0.577379	0.856	0.825
Klrb1b	1.24555e-88	2.97835e-84	87.9046	83.526	-6.60165	0.003	0.112
Coprs	1.2655e-88	3.02607e-84	87.8977	83.5191	0.760752	0.4	0.224
Trem2	1.55945e-88	3.72896e-84	87.807	83.4284	0.322188	0.975	0.921
Fchsd2	1.58965e-88	3.80116e-84	87.7987	83.4201	-1.16771	0.397	0.51
Retreg1	1.63827e-88	3.91742e-84	87.7856	83.407	-0.785708	0.614	0.667
AU022793	2.2868e-88	5.46819e-84	87.6408	83.2622	1.21242	0.251	0.114
Ndufs6	3.12552e-88	7.47374e-84	87.5051	83.1265	0.360157	0.907	0.789
Clec2d	3.49794e-88	8.36428e-84	87.4562	83.0776	-1.95937	0.135	0.293
Mx1	3.65086e-88	8.72994e-84	87.4376	83.059	-3.12367	0.062	0.203
Lbr	3.93661e-88	9.41323e-84	87.4049	83.0263	-1.78991	0.138	0.298
Sec24d	9.54926e-88	2.28342e-83	87.02	82.6414	0.724244	0.44	0.256
Rps6ka5	1.3531e-87	3.23554e-83	86.8687	82.4901	-1.64372	0.146	0.307
Clec4n	1.36609e-87	3.26658e-83	86.8645	82.4859	1.03929	0.618	0.464
Gpr157	1.52112e-87	3.63731e-83	86.8178	82.4392	0.980277	0.327	0.17
Lat2	1.77373e-87	4.24134e-83	86.7511	82.3725	0.451349	0.865	0.697
Ndufv3	2.1462e-87	5.13199e-83	86.6683	82.2897	0.3649	0.926	0.822
Bcar3	2.21254e-87	5.29063e-83	86.6551	82.2765	0.69137	0.439	0.255
Cd209a	3.23216e-87	7.72873e-83	86.4905	82.1119	-7.04282	0.007	0.118
Naa20	3.73791e-87	8.93809e-83	86.4274	82.0488	0.46762	0.782	0.563
Man1a	6.2285e-87	1.48936e-82	86.2056	81.827	-0.973255	0.557	0.615
Cers6	6.32207e-87	1.51173e-82	86.1991	81.8205	-1.10087	0.591	0.661
Pdcd5	7.68854e-87	1.83848e-82	86.1142	81.7355	0.411827	0.907	0.765
Mydgf	9.49691e-87	2.2709e-82	86.0224	81.6438	0.415629	0.867	0.704
Lair1	1.02982e-86	2.46251e-82	85.9872	81.6086	-0.829176	0.66	0.675
Otulinl	1.31323e-86	3.1402e-82	85.8817	81.503	-0.44542	0.882	0.866
Cers2	3.07387e-86	7.35023e-82	85.5123	81.1337	0.470718	0.752	0.542
Dgkd	3.41152e-86	8.15762e-82	85.4671	81.0884	-1.01322	0.461	0.563
Il1r2	4.10225e-86	9.8093e-82	85.387	81.0084	-4.11177	0.013	0.127
Snrpg	5.1432e-86	1.22984e-81	85.2888	80.9102	-0.356779	0.942	0.916
Tmem14c	5.84226e-86	1.397e-81	85.2334	80.8548	0.307483	0.942	0.866
Nr1h3	6.62411e-86	1.58396e-81	85.1789	80.8003	0.673191	0.347	0.179
Capn2	1.03808e-85	2.48227e-81	84.9838	80.6052	0.48687	0.544	0.334
Znhit1	1.14671e-85	2.74201e-81	84.9405	80.5619	0.452711	0.772	0.567
Slc12a6	2.00166e-85	4.78638e-81	84.6986	80.32	-0.791472	0.667	0.706
Ntpcr	2.21481e-85	5.29606e-81	84.6547	80.276	-0.771469	0.682	0.687
Zup1	2.47167e-85	5.91026e-81	84.607	80.2284	-1.14783	0.415	0.533
Ifih1	2.54935e-85	6.09602e-81	84.5936	80.215	-1.62254	0.227	0.381
Arhgap19	2.62752e-85	6.28293e-81	84.5805	80.2018	0.41875	0.576	0.363
Mrpl20	4.75964e-85	1.13813e-80	84.3224	79.9438	0.394129	0.877	0.721
Itpr1	5.04673e-85	1.20677e-80	84.297	79.9184	-1.85709	0.204	0.359
Naa50	5.39455e-85	1.28995e-80	84.268	79.8894	0.489674	0.785	0.577
Scamp2	1.38995e-84	3.32364e-80	83.857	79.4784	-0.647726	0.747	0.73
Uqcr10	2.00139e-84	4.78573e-80	83.6987	79.3201	0.341346	0.947	0.878
Stap1	2.07622e-84	4.96467e-80	83.6827	79.3041	-2.92571	0.053	0.187
H2-T23	2.45268e-84	5.86486e-80	83.6104	79.2317	-0.834658	0.65	0.714
Ldlrad3	2.71805e-84	6.4994e-80	83.5657	79.1871	0.418991	0.475	0.275
Cd200r1	3.60206e-84	8.61324e-80	83.4434	79.0648	0.433776	0.589	0.384
Acta2	3.71757e-84	8.88944e-80	83.4297	79.0511	1.7702	0.116	0.031
Arl8a	5.79497e-84	1.38569e-79	83.2369	78.8583	0.46235	0.754	0.539
Cd22	6.53904e-84	1.56362e-79	83.1845	78.8059	0.897779	0.326	0.171
Gabarapl1	6.98059e-84	1.6692e-79	83.1561	78.7775	0.799128	0.416	0.243
Gsn	7.00615e-84	1.67531e-79	83.1545	78.7759	0.418894	0.828	0.642
Tanc2	7.04647e-84	1.68495e-79	83.152	78.7734	-1.1174	0.527	0.601
Pik3cd	7.9276e-84	1.89565e-79	83.1009	78.7222	-0.894088	0.499	0.592
Emc7	1.11005e-83	2.65434e-79	82.9547	78.576	0.431692	0.84	0.659
Rps6ka3	1.7654e-83	4.22143e-79	82.7532	78.3745	-0.879648	0.559	0.625
Cd81	2.00982e-83	4.80589e-79	82.6968	78.3182	-0.957573	0.761	0.745
Mfsd11	4.78999e-83	1.14538e-78	82.3197	77.941	0.49078	0.642	0.43
Ywhag	8.73442e-83	2.08858e-78	82.0588	77.6801	0.445459	0.825	0.633
Myl6	1.11314e-82	2.66174e-78	81.9535	77.5748	0.201542	0.978	0.967
Tomm20	1.15661e-82	2.76569e-78	81.9368	77.5582	0.347104	0.936	0.843
Pfdn5	2.38973e-82	5.71433e-78	81.6217	77.243	-0.285905	0.96	0.946
Arhgap18	2.97135e-82	7.10509e-78	81.527	77.1484	-1.13753	0.512	0.603
Gm2a	3.25607e-82	7.78592e-78	81.4873	77.1087	-0.694563	0.837	0.828
Psmc1	3.92001e-82	9.37353e-78	81.4067	77.0281	0.486634	0.764	0.562
Ly6c2	5.24645e-82	1.25453e-77	81.2801	76.9015	-3.3961	0.111	0.254
Selenow	5.81327e-82	1.39007e-77	81.2356	76.857	0.313298	0.934	0.846
Sh3glb1	7.1176e-82	1.70196e-77	81.1477	76.7691	0.297274	0.964	0.925
Sptssa	7.57099e-82	1.81037e-77	81.1208	76.7422	0.443949	0.858	0.722
Arfgef2	7.72602e-82	1.84745e-77	81.112	76.7334	0.622788	0.514	0.323
Vegfb	9.70295e-82	2.32017e-77	81.0131	76.6345	0.574793	0.61	0.402
Ssu72	1.03033e-81	2.46372e-77	80.987	76.6084	0.378798	0.888	0.749
Atp6v1b2	1.15023e-81	2.75044e-77	80.9392	76.5606	0.401789	0.852	0.665
Ext1	1.59387e-81	3.81127e-77	80.7975	76.4189	-0.98509	0.672	0.724
S100a4	2.09584e-81	5.01157e-77	80.6786	76.3	-1.45502	0.709	0.722
Cxcr4	2.27952e-81	5.4508e-77	80.6422	76.2635	0.432806	0.576	0.362
Dbi	2.33403e-81	5.58113e-77	80.6319	76.2533	0.390076	0.951	0.893
Nampt	2.61362e-81	6.24968e-77	80.5828	76.2041	0.386318	0.817	0.616
S100a1	3.88824e-81	9.29756e-77	80.4102	76.0316	0.62651	0.678	0.486
Vdac2	4.31264e-81	1.03124e-76	80.3653	75.9866	0.331528	0.933	0.838
Rap1a	5.23839e-81	1.2526e-76	80.2808	75.9022	-0.428307	0.906	0.888
Capns1	5.31245e-81	1.27031e-76	80.2747	75.8961	0.320885	0.915	0.803
Slc43a2	6.34168e-81	1.51642e-76	80.1978	75.8192	0.412332	0.843	0.656
Ppp1r12a	6.72233e-81	1.60744e-76	80.1725	75.7939	-0.614798	0.737	0.745
Slc66a1	6.80592e-81	1.62743e-76	80.1671	75.7885	0.616872	0.469	0.288
Scpep1	1.28942e-80	3.08326e-76	79.8896	75.511	0.406064	0.859	0.7
Gpr132	1.44321e-80	3.45101e-76	79.8407	75.4621	-3.19751	0.043	0.168
Calr	2.09168e-80	5.00162e-76	79.6795	75.3009	0.285311	0.969	0.95
Manf	2.17758e-80	5.20702e-76	79.662	75.2834	0.358424	0.92	0.818
S1pr2	2.4074e-80	5.75657e-76	79.6185	75.2398	0.584954	0.398	0.224
Oas3	2.98479e-80	7.13724e-76	79.5251	75.1465	-2.86608	0.052	0.181
Dennd4c	4.10382e-80	9.81305e-76	79.3868	75.0082	0.476338	0.641	0.439
Hk3	4.38306e-80	1.04808e-75	79.3582	74.9796	0.5497	0.578	0.378
Man2a1	4.65054e-80	1.11204e-75	79.3325	74.9539	0.395572	0.861	0.692
Rgcc	5.03655e-80	1.20434e-75	79.2979	74.9193	1.69467	0.117	0.032
Rpl3	6.66555e-80	1.59387e-75	79.1762	74.7975	-0.224349	0.983	0.977
Plxna4	8.8096e-80	2.10655e-75	79.055	74.6764	-1.67577	0.126	0.275
Gm5086	1.18244e-79	2.82746e-75	78.9272	74.5486	-1.19903	0.393	0.516
Ipcef1	1.27207e-79	3.04178e-75	78.8955	74.5169	-2.85592	0.048	0.174
Parp9	1.41547e-79	3.38468e-75	78.8491	74.4705	-1.28584	0.318	0.452
Arf1	1.56457e-79	3.74121e-75	78.8056	74.427	0.322421	0.935	0.847
Atp6v1h	1.64957e-79	3.94446e-75	78.7826	74.404	0.487218	0.696	0.483
Sypl	1.73598e-79	4.15107e-75	78.7605	74.3818	0.44766	0.778	0.573
Gadd45b	2.47126e-79	5.90928e-75	78.6071	74.2285	1.0929	0.245	0.113
St3gal6	2.50508e-79	5.99015e-75	78.6012	74.2226	-1.47849	0.188	0.334
Hspa5	2.81555e-79	6.73255e-75	78.5504	74.1718	0.294799	0.964	0.948
Pam	3.17306e-79	7.58741e-75	78.4985	74.1199	0.476331	0.472	0.283
Uba52	3.18692e-79	7.62057e-75	78.4966	74.118	-0.346918	0.931	0.926
Mien1	3.32985e-79	7.96235e-75	78.4776	74.099	0.426748	0.82	0.639
Dock10	4.06761e-79	9.72647e-75	78.3907	74.012	-0.569342	0.851	0.845
Dclre1c	7.1464e-79	1.70885e-74	78.1459	73.7673	-1.20607	0.382	0.506
Med13l	7.2012e-79	1.72195e-74	78.1426	73.764	-0.97298	0.486	0.577
0610040J01Rik	1.65857e-78	3.96597e-74	77.7803	73.4017	-1.21619	0.294	0.426
Ptpmt1	1.9018e-78	4.54758e-74	77.7208	73.3422	0.461751	0.704	0.499
Rai14	1.90858e-78	4.5638e-74	77.7193	73.3407	0.354633	0.696	0.476
Clcn7	2.30397e-78	5.50925e-74	77.6375	73.2589	0.60284	0.444	0.268
Trim12a	2.97142e-78	7.10526e-74	77.527	73.1484	-1.39775	0.245	0.389
Tmem86a	4.11968e-78	9.85098e-74	77.3851	73.0065	0.383358	0.808	0.608
Atg5	4.4291e-78	1.05909e-73	77.3537	72.9751	0.497756	0.716	0.519
5033421B08Rik	4.87346e-78	1.16534e-73	77.3122	72.9335	0.766644	0.296	0.15
Frmd4a	4.93719e-78	1.18058e-73	77.3065	72.9279	-1.04358	0.42	0.517
Etv6	5.63266e-78	1.34688e-73	77.2493	72.8707	-0.590791	0.89	0.883
Usp18	8.0907e-78	1.93465e-73	77.092	72.7134	-2.28152	0.1	0.24
Crtap	8.28454e-78	1.981e-73	77.0817	72.7031	0.751139	0.38	0.219
Ostc	1.06418e-77	2.54468e-73	76.973	72.5944	0.392304	0.878	0.741
Spsb2	1.19467e-77	2.8567e-73	76.9228	72.5441	0.517995	0.511	0.319
Tm6sf1	1.28578e-77	3.07457e-73	76.8908	72.5122	-0.665244	0.736	0.742
Pwwp2b	1.28685e-77	3.07712e-73	76.8905	72.5119	0.975916	0.26	0.125
Atp5l	2.82891e-77	6.76448e-73	76.5484	72.1698	0.225692	0.973	0.949
Trerf1	3.75607e-77	8.98152e-73	76.4253	72.0467	-1.88041	0.254	0.396
Atp5e	3.83218e-77	9.16351e-73	76.4166	72.0379	0.190469	0.978	0.968
Sirpb1b	4.0022e-77	9.57006e-73	76.3977	72.0191	-2.06526	0.171	0.313
Pfdn1	4.24445e-77	1.01493e-72	76.3722	71.9936	0.405415	0.822	0.622
Cyc1	4.64344e-77	1.11034e-72	76.3332	71.9545	0.425776	0.785	0.59
Ltb4r1	5.48796e-77	1.31228e-72	76.2606	71.882	-2.67495	0.056	0.184
Skap2	6.33154e-77	1.514e-72	76.1985	71.8199	-0.351933	0.949	0.929
Arsb	1.02616e-76	2.45374e-72	75.9888	71.6102	-1.22724	0.418	0.504
Dnase2a	1.05477e-76	2.52216e-72	75.9768	71.5982	0.364486	0.831	0.636
Echs1	1.05969e-76	2.53394e-72	75.9748	71.5962	0.485564	0.735	0.535
Rpn1	1.77296e-76	4.23949e-72	75.7513	71.3727	0.423799	0.87	0.713
Ctsh	1.81229e-76	4.33356e-72	75.7418	71.3632	0.22118	0.972	0.964
Wipf1	2.27701e-76	5.44478e-72	75.6426	71.264	-0.541875	0.842	0.838
Nipbl	2.38336e-76	5.69908e-72	75.6228	71.2442	-0.525535	0.81	0.806
Gpr171	2.57237e-76	6.15106e-72	75.5897	71.211	-3.2174	0.042	0.161
Tecpr1	2.94931e-76	7.05238e-72	75.5303	71.1517	0.761293	0.392	0.231
Ubc	3.14735e-76	7.52594e-72	75.5021	71.1234	0.337168	0.939	0.85
Fam219a	3.64686e-76	8.72037e-72	75.4381	71.0595	0.588401	0.517	0.332
Cox8a	4.00005e-76	9.56493e-72	75.3979	71.0193	0.212265	0.978	0.962
Mrps14	4.05086e-76	9.68641e-72	75.3925	71.0138	0.389195	0.884	0.736
Stat4	5.53435e-76	1.32337e-71	75.2569	70.8783	-3.08243	0.045	0.166
Phf11d	1.54451e-75	3.69324e-71	74.8112	70.4326	-2.07881	0.131	0.272
Galc	1.66335e-75	3.97739e-71	74.779	70.4004	0.390937	0.657	0.448
Prex1	2.2018e-75	5.26494e-71	74.6572	70.2786	-0.700057	0.652	0.673
Gnl3	2.74991e-75	6.57559e-71	74.5607	70.1821	0.58796	0.548	0.356
Phf21a	3.04894e-75	7.29063e-71	74.5159	70.1372	-0.799374	0.603	0.656
Lacc1	3.13555e-75	7.49773e-71	74.5037	70.1251	-1.16556	0.324	0.446
Pef1	5.1446e-75	1.23018e-70	74.2886	69.91	0.7419	0.363	0.205
Dusp16	5.38913e-75	1.28865e-70	74.2685	69.8899	-2.09954	0.08	0.215
Tor1aip1	5.90209e-75	1.41131e-70	74.229	69.8504	-0.600889	0.783	0.771
Ptger2	6.87091e-75	1.64297e-70	74.163	69.7844	0.955122	0.192	0.079
Fbxo22	7.55234e-75	1.80592e-70	74.1219	69.7433	0.568006	0.491	0.309
Glipr1	7.99974e-75	1.9129e-70	74.0969	69.7183	0.521988	0.592	0.399
Rasgrp3	9.55515e-75	2.28483e-70	74.0198	69.6411	-1.16617	0.253	0.386
Snap47	9.56124e-75	2.28628e-70	74.0195	69.6409	0.888358	0.306	0.164
Ccr1	1.23325e-74	2.94895e-70	73.9089	69.5303	-0.959216	0.466	0.592
Lmo2	1.28589e-74	3.07482e-70	73.8908	69.5122	-0.697642	0.623	0.655
Stxbp6	1.71638e-74	4.10422e-70	73.7654	69.3868	-3.53407	0.031	0.144
Phactr2	1.74709e-74	4.17765e-70	73.7577	69.3791	-1.08756	0.482	0.575
Tbc1d2	2.52953e-74	6.04861e-70	73.597	69.2183	1.3731	0.133	0.043
Timm23	3.35923e-74	8.0326e-70	73.4738	69.0951	0.412091	0.831	0.649
Dusp3	3.62853e-74	8.67655e-70	73.4403	69.0617	0.416498	0.76	0.564
Luc7l2	3.88034e-74	9.27867e-70	73.4111	69.0325	-0.483326	0.867	0.837
Arhgap39	3.97271e-74	9.49953e-70	73.4009	69.0223	-1.08708	0.356	0.475
Ezr	4.09567e-74	9.79356e-70	73.3877	69.0091	0.479086	0.612	0.409
Cyp27a1	4.18353e-74	1.00037e-69	73.3785	68.9998	-1.88275	0.116	0.256
Neurl3	4.53099e-74	1.08345e-69	73.3438	68.9652	-1.18831	0.427	0.534
Rit1	4.62004e-74	1.10474e-69	73.3354	68.9567	0.628262	0.47	0.295
Uqcrh	5.33069e-74	1.27468e-69	73.2732	68.8946	-0.280671	0.957	0.945
Nhp2	6.53314e-74	1.5622e-69	73.1849	68.8063	0.405406	0.789	0.583
Nucb1	6.90106e-74	1.65018e-69	73.1611	68.7825	0.407657	0.843	0.658
Ltc4s	7.06548e-74	1.6895e-69	73.1509	68.7722	-1.1333	0.539	0.583
Egln3	8.40707e-74	2.0103e-69	73.0754	68.6967	1.38415	0.166	0.064
Prcp	1.21275e-73	2.89992e-69	72.9162	68.5376	-0.945801	0.534	0.6
Sh3pxd2a	1.36797e-73	3.2711e-69	72.8639	68.4853	-1.38307	0.228	0.367
Mgat4a	1.54228e-73	3.6879e-69	72.8118	68.4332	-1.05382	0.387	0.49
Ccl12	2.07497e-73	4.96167e-69	72.683	68.3044	-1.83695	0.457	0.537
Tmcc1	2.17544e-73	5.20191e-69	72.6625	68.2838	-1.05217	0.598	0.65
Tnrc6b	2.28944e-73	5.4745e-69	72.6403	68.2617	-0.791974	0.543	0.609
Rps27l	2.69592e-73	6.44648e-69	72.5693	68.1907	0.287457	0.958	0.925
Eif3e	3.28101e-73	7.84554e-69	72.484	68.1054	-0.53686	0.81	0.791
Rgs2	3.53022e-73	8.44145e-69	72.4522	68.0736	-0.91754	0.505	0.58
Ttc28	4.52461e-73	1.08193e-68	72.3444	67.9658	-1.25781	0.303	0.428
Ints6l	5.0314e-73	1.20311e-68	72.2983	67.9197	-1.13166	0.315	0.438
Pdia6	6.00184e-73	1.43516e-68	72.2217	67.8431	0.294053	0.944	0.88
Xdh	6.00813e-73	1.43666e-68	72.2213	67.8426	0.297627	0.619	0.403
Shtn1	8.1351e-73	1.94527e-68	72.0896	67.711	0.417902	0.56	0.367
Cyb5r3	8.48063e-73	2.02789e-68	72.0716	67.693	0.490769	0.612	0.417
Sell	9.58384e-73	2.29169e-68	72.0185	67.6398	-5.52467	0.007	0.102
Cib1	1.3293e-72	3.17862e-68	71.8764	67.4978	0.384145	0.762	0.569
Agpat5	1.43274e-72	3.42596e-68	71.8438	67.4652	0.479315	0.672	0.467
Hadh	1.51291e-72	3.61766e-68	71.8202	67.4416	0.575837	0.495	0.317
Vcp	1.72262e-72	4.11914e-68	71.7638	67.3852	0.359257	0.913	0.775
Cd14	1.97332e-72	4.71861e-68	71.7048	67.3262	-1.0019	0.409	0.531
Srp9	2.62828e-72	6.28475e-68	71.5803	67.2017	0.313171	0.918	0.812
Adh5	3.57106e-72	8.53912e-68	71.4472	67.0686	0.412968	0.8	0.608
Dnmt1	3.92072e-72	9.37522e-68	71.4066	67.028	0.494548	0.59	0.395
Grk3	4.49267e-72	1.07429e-67	71.3475	66.9689	-2.04055	0.134	0.273
Cux1	4.52679e-72	1.08245e-67	71.3442	66.9656	-0.477284	0.887	0.85
Mospd1	4.65179e-72	1.11234e-67	71.3324	66.9538	0.876194	0.291	0.153
Psen2	5.93054e-72	1.41811e-67	71.2269	66.8483	0.436438	0.589	0.396
Agmo	5.93798e-72	1.41989e-67	71.2264	66.8477	-1.51555	0.167	0.308
Smchd1	5.9686e-72	1.42721e-67	71.2241	66.8455	-0.772642	0.628	0.667
Cd300a	7.11235e-72	1.70071e-67	71.148	66.7694	0.316352	0.849	0.693
Entpd1	8.0357e-72	1.9215e-67	71.095	66.7164	-0.686505	0.685	0.702
Qki	8.42068e-72	2.01355e-67	71.0747	66.696	-0.35135	0.95	0.916
Fam234a	8.43057e-72	2.01592e-67	71.0741	66.6955	0.375827	0.585	0.389
Rsrp1	8.93537e-72	2.13662e-67	71.0489	66.6703	-0.440265	0.896	0.889
Ssbp2	9.2716e-72	2.21702e-67	71.0328	66.6542	-1.37659	0.167	0.31
Adgrl2	1.03359e-71	2.47152e-67	70.9857	66.607	0.739998	0.389	0.234
Lman1	1.12764e-71	2.69642e-67	70.9478	66.5692	0.388455	0.788	0.581
Get3	1.21508e-71	2.90549e-67	70.9154	66.5368	0.487377	0.63	0.432
Srgap3	1.25844e-71	3.00918e-67	70.9002	66.5216	-3.00159	0.021	0.126
Ifit1	1.81148e-71	4.33161e-67	70.742	66.3634	-2.89895	0.068	0.192
H3f3b	1.9883e-71	4.75443e-67	70.7015	66.3229	-0.312709	0.978	0.973
Synj1	2.02189e-71	4.83474e-67	70.6942	66.3156	-0.892736	0.512	0.592
Chpt1	2.03231e-71	4.85965e-67	70.692	66.3134	0.524524	0.499	0.321
Glis3	2.354e-71	5.62889e-67	70.6282	66.2496	0.471871	0.463	0.289
Son	2.56799e-71	6.14057e-67	70.5904	66.2118	-0.295456	0.954	0.94
Mrps18b	3.22223e-71	7.705e-67	70.4918	66.1132	0.646043	0.446	0.276
Cycs	4.23007e-71	1.0115e-66	70.3737	65.995	0.361542	0.873	0.71
Eea1	4.816e-71	1.1516e-66	70.3173	65.9387	0.416171	0.829	0.633
Timm17a	5.30921e-71	1.26954e-66	70.275	65.8964	0.46066	0.672	0.47
Rragd	6.2317e-71	1.49012e-66	70.2054	65.8268	1.8944	0.118	0.037
Acadl	6.29821e-71	1.50603e-66	70.2008	65.8222	0.470542	0.718	0.522
Tmem104	8.14764e-71	1.94826e-66	70.089	65.7104	0.434965	0.637	0.436
Eif3h	1.06519e-70	2.54709e-66	69.9726	65.594	-0.394933	0.9	0.877
Gvin2	1.06925e-70	2.55679e-66	69.9709	65.5923	-2.68228	0.047	0.163
Marchf8	1.1276e-70	2.69631e-66	69.9478	65.5692	0.523804	0.514	0.334
Misp3	1.592e-70	3.80678e-66	69.7981	65.4194	1.6754	0.115	0.035
Bag1	1.7075e-70	4.08297e-66	69.7676	65.389	0.310135	0.929	0.811
Fam111a	2.00122e-70	4.78532e-66	69.6987	65.3201	-0.949695	0.51	0.578
Ube2a	3.33972e-70	7.98594e-66	69.4763	65.0977	0.372041	0.808	0.622
Rabac1	4.56764e-70	1.09221e-65	69.3403	64.9617	0.337577	0.912	0.801
Scarb2	4.59056e-70	1.0977e-65	69.3381	64.9595	0.34725	0.891	0.759
Phlpp1	5.7293e-70	1.36999e-65	69.2419	64.8633	-1.52226	0.179	0.323
Ubxn8	6.37474e-70	1.52433e-65	69.1955	64.8169	0.754877	0.327	0.181
Spata13	8.45758e-70	2.02238e-65	69.0728	64.6941	-1.49619	0.149	0.286
Mapk14	9.63011e-70	2.30275e-65	69.0164	64.6378	-0.813683	0.56	0.617
Vegfa	1.00522e-69	2.40367e-65	68.9977	64.6191	0.653357	0.245	0.118
Ddx39a	1.0787e-69	2.57938e-65	68.9671	64.5885	0.49656	0.588	0.392
Coro1c	1.21211e-69	2.8984e-65	68.9165	64.5378	0.40691	0.794	0.599
Prnp	1.34752e-69	3.22219e-65	68.8705	64.4918	1.6186	0.21	0.095
AU020206	1.66579e-69	3.98325e-65	68.7784	64.3998	-0.62913	0.77	0.751
Rps19bp1	1.8652e-69	4.46006e-65	68.7293	64.3507	0.535074	0.597	0.409
Syne1	1.90502e-69	4.55528e-65	68.7201	64.3415	1.51703	0.182	0.076
Stx7	2.55939e-69	6.12002e-65	68.5919	64.2132	-0.480876	0.818	0.803
Sema4d	2.76657e-69	6.61542e-65	68.5581	64.1794	-0.900148	0.502	0.574
Ogfrl1	2.79934e-69	6.69378e-65	68.5529	64.1743	-0.874118	0.475	0.552
F13a1	5.80184e-69	1.38734e-64	68.2364	63.8578	0.175985	0.852	0.675
Sla	6.27868e-69	1.50136e-64	68.2021	63.8235	-0.932294	0.47	0.551
Srsf5	7.40575e-69	1.77086e-64	68.1304	63.7518	-0.644337	0.745	0.752
Glrx5	9.61801e-69	2.29986e-64	68.0169	63.6383	0.462563	0.701	0.503
Metrnl	9.83421e-69	2.35156e-64	68.0073	63.6286	0.325631	0.774	0.577
Bank1	1.01484e-68	2.42669e-64	67.9936	63.615	-2.25428	0.111	0.242
Washc5	1.28151e-68	3.06435e-64	67.8923	63.5137	0.462105	0.603	0.41
Vdac1	1.57294e-68	3.76122e-64	67.8033	63.4247	0.420315	0.824	0.642
Eps8	2.3242e-68	5.55763e-64	67.6337	63.2551	-1.2128	0.364	0.487
H2-Q7	2.93503e-68	7.01824e-64	67.5324	63.1538	-2.31884	0.06	0.18
Stk10	3.34022e-68	7.98714e-64	67.4762	63.0976	-1.2136	0.351	0.464
Lmnb1	4.02736e-68	9.63021e-64	67.395	63.0164	-1.36432	0.3	0.423
Txnl1	4.32773e-68	1.03485e-63	67.3637	62.9851	0.417298	0.837	0.653
Nsd3	4.66884e-68	1.11641e-63	67.3308	62.9522	-0.725552	0.654	0.681
Bmyc	6.04155e-68	1.44466e-63	67.2189	62.8402	-0.97241	0.452	0.531
Tmem160	7.83861e-68	1.87437e-63	67.1058	62.7271	0.314814	0.911	0.8
Abi1	8.63386e-68	2.06453e-63	67.0638	62.6852	-0.471859	0.831	0.814
Snhg8	1.01128e-67	2.41817e-63	66.9951	62.6165	-0.785449	0.507	0.577
Stx4a	1.31608e-67	3.147e-63	66.8807	62.5021	0.398342	0.767	0.568
Plxnd1	1.61507e-67	3.86195e-63	66.7918	62.4132	0.481023	0.471	0.295
Kcnab2	1.91601e-67	4.58157e-63	66.7176	62.339	0.528223	0.353	0.198
Gyg	2.05372e-67	4.91085e-63	66.6875	62.3088	0.418852	0.639	0.442
Atrx	2.35134e-67	5.62253e-63	66.6287	62.2501	-0.548815	0.766	0.754
Lrmda	2.48436e-67	5.9406e-63	66.6048	62.2262	0.284214	0.97	0.918
Man2b1	2.61304e-67	6.2483e-63	66.5829	62.2042	-0.429236	0.88	0.855
Scamp3	3.56275e-67	8.51926e-63	66.4482	62.0696	0.482264	0.61	0.423
Sppl2a	5.22149e-67	1.24856e-62	66.2822	61.9036	-0.560879	0.802	0.775
Rcsd1	6.34654e-67	1.51759e-62	66.1975	61.8188	-1.10295	0.322	0.443
Plgrkt	6.55588e-67	1.56764e-62	66.1834	61.8048	0.372614	0.832	0.644
Ubl4a	7.63177e-67	1.82491e-62	66.1174	61.7388	0.439247	0.632	0.429
Pdgfb	7.70001e-67	1.84123e-62	66.1135	61.7349	-1.35502	0.167	0.3
Spcs1	7.73739e-67	1.85017e-62	66.1114	61.7328	0.337028	0.899	0.768
Gm47754	7.73981e-67	1.85074e-62	66.1113	61.7327	-2.01125	0.08	0.204
mt-Atp6	8.22994e-67	1.96794e-62	66.0846	61.706	-0.208126	0.994	0.999
Dek	8.90165e-67	2.12856e-62	66.0505	61.6719	-0.604886	0.785	0.755
Cdv3	9.84547e-67	2.35425e-62	66.0068	61.6281	0.379078	0.816	0.631
Cope	1.24044e-66	2.96615e-62	65.9064	61.5278	0.376364	0.85	0.698
Slc35b1	1.30594e-66	3.12277e-62	65.8841	61.5055	0.438097	0.694	0.491
Ccdc125	1.86699e-66	4.46436e-62	65.7289	61.3502	0.865758	0.211	0.097
Gm37168	1.97956e-66	4.73351e-62	65.7034	61.3248	0.988659	0.26	0.136
Scd2	2.50736e-66	5.99561e-62	65.6008	61.2222	0.842028	0.546	0.369
Eif5a	2.55789e-66	6.11643e-62	65.5921	61.2135	0.267844	0.945	0.869
Pot1b	2.9644e-66	7.08848e-62	65.5281	61.1494	-1.52133	0.204	0.338
Procr	3.15675e-66	7.54842e-62	65.5008	61.1221	1.54287	0.151	0.058
Hacd1	3.42251e-66	8.18391e-62	65.4657	61.087	0.839965	0.298	0.165
Mrpl12	4.05479e-66	9.69581e-62	65.392	61.0134	0.437466	0.753	0.559
Card11	5.03074e-66	1.20295e-61	65.2984	60.9198	-2.3172	0.065	0.183
Tmem208	5.96367e-66	1.42603e-61	65.2245	60.8459	0.376028	0.83	0.665
Gdi2	6.03099e-66	1.44213e-61	65.2196	60.841	-0.317111	0.944	0.92
Lonrf3	7.9565e-66	1.90256e-61	65.0993	60.7207	0.727466	0.363	0.214
Hcls1	8.58276e-66	2.05231e-61	65.0664	60.6878	-0.549402	0.774	0.773
D17H6S56E-5	1.22662e-65	2.93311e-61	64.9113	60.5327	-1.57402	0.152	0.281
Gm35154	1.38688e-65	3.31631e-61	64.858	60.4793	-1.54786	0.172	0.307
Tap1	1.4715e-65	3.51865e-61	64.8322	60.4536	-1.33259	0.283	0.408
Akt3	1.55487e-65	3.718e-61	64.8083	60.4297	-1.51389	0.306	0.428
Slc35f6	2.4573e-65	5.8759e-61	64.6095	60.2309	0.436757	0.535	0.352
Timm8b	2.8859e-65	6.90076e-61	64.5397	60.1611	0.382261	0.833	0.665
Eif5	3.10498e-65	7.42462e-61	64.5079	60.1293	0.412807	0.864	0.717
Aurkaip1	3.29291e-65	7.874e-61	64.4824	60.1038	0.356654	0.853	0.705
Mtm1	3.50995e-65	8.393e-61	64.4547	60.0761	0.489114	0.483	0.314
Lrp8	4.14224e-65	9.90494e-61	64.3828	60.0041	1.46757	0.129	0.045
Mrc1	6.48715e-65	1.55121e-60	64.1879	59.8093	-2.77921	0.396	0.484
Arhgap24	7.5044e-65	1.79445e-60	64.1247	59.7461	0.276069	0.934	0.779
Cd302	8.15505e-65	1.95004e-60	64.0886	59.71	0.416726	0.779	0.615
Trim12c	1.00789e-64	2.41007e-60	63.9966	59.618	-1.31207	0.285	0.408
Ldlrap1	1.12316e-64	2.68571e-60	63.9496	59.5709	0.397803	0.55	0.362
Agtrap	1.13737e-64	2.71967e-60	63.9441	59.5655	0.468161	0.442	0.275
Camk2d	1.32707e-64	3.17329e-60	63.8771	59.4985	-0.535327	0.831	0.8
Psmd14	1.41039e-64	3.37253e-60	63.8507	59.472	0.395156	0.801	0.619
Gm26569	1.57286e-64	3.76102e-60	63.8033	59.4247	1.16089	0.135	0.048
Ifrd1	1.95788e-64	4.68169e-60	63.7082	59.3296	0.769941	0.378	0.233
Tmem82	2.04129e-64	4.88114e-60	63.6901	59.3115	1.53903	0.118	0.039
Ncbp2as2	2.87063e-64	6.86425e-60	63.542	59.1634	0.361032	0.866	0.704
Dhrs7	2.96867e-64	7.09869e-60	63.5274	59.1488	0.388993	0.692	0.492
Gm50020	3.26601e-64	7.80968e-60	63.486	59.1074	1.2425	0.165	0.068
Crlf3	4.12052e-64	9.853e-60	63.385	59.0064	-0.849244	0.532	0.595
Mr1	4.74413e-64	1.13442e-59	63.3238	58.9452	0.864532	0.26	0.137
St3gal4	5.28157e-64	1.26293e-59	63.2772	58.8986	-1.60739	0.297	0.414
Il10ra	6.02575e-64	1.44088e-59	63.22	58.8414	-0.93416	0.452	0.54
Tmem119	6.45869e-64	1.5444e-59	63.1899	58.8112	-0.998494	0.508	0.559
Rps6ka1	6.97959e-64	1.66896e-59	63.1562	58.7776	-0.80347	0.491	0.552
Klhl6	7.69745e-64	1.84061e-59	63.1137	58.735	-1.02662	0.365	0.463
Rap2a	8.87023e-64	2.12105e-59	63.0521	58.6734	0.366916	0.814	0.624
Gypc	8.99846e-64	2.15171e-59	63.0458	58.6672	1.34803	0.119	0.04
Itch	1.0514e-63	2.5141e-59	62.9782	58.5996	-0.739359	0.634	0.664
4933406I18Rik	1.08583e-63	2.59645e-59	62.9642	58.5856	-1.07694	0.322	0.432
Kif13b	1.28953e-63	3.08352e-59	62.8896	58.511	0.348717	0.752	0.559
Lcp2	1.2956e-63	3.09804e-59	62.8875	58.5089	-0.752184	0.577	0.616
Tgm2	1.65206e-63	3.9504e-59	62.782	58.4034	0.132339	0.676	0.472
2210408F21Rik	2.39428e-63	5.72521e-59	62.6208	58.2422	0.499393	0.476	0.307
Txndc5	3.07774e-63	7.3595e-59	62.5118	58.1332	0.445836	0.531	0.35
Mafg	3.59299e-63	8.59156e-59	62.4445	58.0659	0.374247	0.73	0.523
Disc1	4.52887e-63	1.08294e-58	62.344	57.9654	-1.2523	0.243	0.374
Gbp3	5.11527e-63	1.22316e-58	62.2911	57.9125	-2.18223	0.084	0.204
Prkcb	5.38167e-63	1.28687e-58	62.2691	57.8905	-0.608238	0.788	0.76
Ifi35	5.78176e-63	1.38254e-58	62.2379	57.8593	-1.0952	0.408	0.507
Acss1	8.28371e-63	1.9808e-58	62.0818	57.7032	-1.46235	0.171	0.301
Mrps18a	8.57003e-63	2.04926e-58	62.067	57.6884	0.407778	0.722	0.522
Kcnip3	8.99074e-63	2.14987e-58	62.0462	57.6676	-2.77033	0.039	0.142
Tmem37	9.09112e-63	2.17387e-58	62.0414	57.6628	0.303081	0.795	0.597
Tmem251	9.88718e-63	2.36422e-58	62.0049	57.6263	0.530215	0.416	0.258
Ndufa11	1.06891e-62	2.55598e-58	61.9711	57.5924	0.338617	0.9	0.774
Stard5	1.13203e-62	2.7069e-58	61.9461	57.5675	0.488512	0.374	0.222
Erp29	1.19637e-62	2.86075e-58	61.9221	57.5435	-0.252893	0.955	0.944
Grpel1	1.33206e-62	3.18522e-58	61.8755	57.4969	0.414326	0.769	0.594
Snx2	1.56336e-62	3.73831e-58	61.8059	57.4273	-0.695006	0.837	0.8
Prkar2b	2.03517e-62	4.8665e-58	61.6914	57.3128	0.727975	0.217	0.103
Gtf2h1	2.06328e-62	4.93371e-58	61.6854	57.3068	0.467496	0.503	0.328
Fdx2	2.12094e-62	5.0716e-58	61.6735	57.2949	0.429585	0.612	0.428
Cmip	2.31443e-62	5.53425e-58	61.6356	57.2569	-0.571681	0.828	0.819
Siglech	2.51769e-62	6.02029e-58	61.599	57.2204	-1.23966	0.448	0.518
Eif3b	2.60773e-62	6.2356e-58	61.5837	57.2051	0.390844	0.696	0.491
Dck	3.03923e-62	7.26741e-58	61.5172	57.1386	-1.5234	0.192	0.322
Gm1673	3.22721e-62	7.7169e-58	61.4912	57.1126	0.835797	0.431	0.287
Gm2629	3.51878e-62	8.41411e-58	61.4536	57.075	-1.04053	0.288	0.402
C3ar1	3.67317e-62	8.78329e-58	61.435	57.0563	0.278924	0.916	0.742
Sipa1l1	3.81451e-62	9.12125e-58	61.4186	57.0399	-1.26368	0.31	0.426
P3h2	5.17413e-62	1.23724e-57	61.2862	56.9075	-1.41254	0.127	0.254
Hspa9	5.22629e-62	1.24971e-57	61.2818	56.9032	0.452371	0.731	0.539
Zcchc7	5.66697e-62	1.35509e-57	61.2466	56.868	-0.65379	0.73	0.733
Scimp	5.75696e-62	1.3766e-57	61.2398	56.8612	-2.60135	0.046	0.152
Ran	5.87687e-62	1.40528e-57	61.2309	56.8522	0.282906	0.933	0.824
Pdzd11	8.16951e-62	1.95349e-57	61.0878	56.7092	0.494822	0.501	0.33
Zfand3	9.81278e-62	2.34643e-57	61.0082	56.6296	-0.568208	0.778	0.766
Ndufb4	1.32445e-61	3.16702e-57	60.878	56.4993	0.399947	0.638	0.447
2610203C22Rik	1.43366e-61	3.42816e-57	60.8436	56.4649	-1.54418	0.155	0.28
Bscl2	1.82596e-61	4.36623e-57	60.7385	56.3599	0.385655	0.684	0.499
Tra2a	2.46544e-61	5.89535e-57	60.6081	56.2295	-0.796435	0.56	0.603
Eif4g3	2.66465e-61	6.37172e-57	60.5744	56.1957	-0.527002	0.768	0.771
Abhd5	2.87449e-61	6.87349e-57	60.5414	56.1628	0.584117	0.388	0.239
Ctnnb1	3.38394e-61	8.09167e-57	60.4706	56.092	0.428155	0.811	0.655
Syngr2	3.4788e-61	8.31851e-57	60.4586	56.08	-0.874976	0.671	0.666
Ptbp3	3.49498e-61	8.35719e-57	60.4566	56.0779	-0.37901	0.882	0.856
Fcgrt	3.57961e-61	8.55957e-57	60.4462	56.0675	-1.73548	0.312	0.422
Nr2c2ap	3.61097e-61	8.63455e-57	60.4424	56.0638	0.540582	0.388	0.235
Ndufa4	3.70835e-61	8.86741e-57	60.4308	56.0522	0.332089	0.955	0.897
Commd3	4.26472e-61	1.01978e-56	60.3701	55.9915	0.381611	0.784	0.609
Themis2	6.0267e-61	1.4411e-56	60.2199	55.8413	-1.2815	0.195	0.325
Phf11a	6.51882e-61	1.55878e-56	60.1858	55.8072	-2.8925	0.034	0.133
Ipo5	8.85199e-61	2.11669e-56	60.053	55.6743	0.456956	0.577	0.396
Arl1	1.67691e-60	4.00983e-56	59.7755	55.3969	0.390712	0.776	0.607
Cd1d1	2.03261e-60	4.86037e-56	59.6919	55.3133	1.1676	0.151	0.062
Phf14	2.0433e-60	4.88593e-56	59.6897	55.3111	-0.626554	0.632	0.651
Nipsnap3b	2.52858e-60	6.04635e-56	59.5971	55.2185	0.437872	0.586	0.406
Gm19705	3.25287e-60	7.77827e-56	59.4877	55.1091	1.1291	0.159	0.066
Sat1	3.80145e-60	9.09002e-56	59.4201	55.0414	-0.372811	0.925	0.914
Ppp1r9a	4.44716e-60	1.06341e-55	59.3519	54.9733	-1.2111	0.221	0.343
Sdf2l1	4.84023e-60	1.1574e-55	59.3151	54.9365	0.345191	0.879	0.727
Lamtor1	5.13185e-60	1.22713e-55	59.2897	54.9111	0.303559	0.929	0.832
Fmnl1	5.27118e-60	1.26044e-55	59.2781	54.8995	-0.918253	0.48	0.55
Sar1b	5.65731e-60	1.35278e-55	59.2474	54.8688	0.364088	0.754	0.567
Mcoln2	5.97919e-60	1.42974e-55	59.2234	54.8447	0.946117	0.167	0.071
Peli1	7.47386e-60	1.78715e-55	59.1265	54.7478	-0.825708	0.524	0.583
Tmed9	8.50292e-60	2.03322e-55	59.0704	54.6918	0.290099	0.914	0.81
Higd1a	8.71632e-60	2.08425e-55	59.0597	54.6811	0.34504	0.849	0.673
Cox4i1	9.52794e-60	2.27832e-55	59.021	54.6424	0.166201	0.985	0.973
Slc39a7	1.09448e-59	2.61711e-55	58.9608	54.5822	0.446536	0.559	0.381
A330040F15Rik	1.21113e-59	2.89605e-55	58.9168	54.5382	-3.19201	0.044	0.145
Fam162a	1.21734e-59	2.91091e-55	58.9146	54.536	0.472217	0.681	0.496
Il18	1.32189e-59	3.16089e-55	58.8788	54.5002	-1.32564	0.25	0.371
Git2	1.34208e-59	3.20918e-55	58.8722	54.4936	-0.790154	0.532	0.58
Eid1	1.3887e-59	3.32067e-55	58.8574	54.4788	-0.659898	0.648	0.665
Gm26626	1.45203e-59	3.4721e-55	58.838	54.4594	1.65966	0.101	0.032
Peds1	1.46791e-59	3.51007e-55	58.8333	54.4547	0.386903	0.68	0.492
Psd3	1.54087e-59	3.68452e-55	58.8122	54.4336	-2.36913	0.124	0.244
Sparc	1.65018e-59	3.94592e-55	58.7825	54.4039	-1.1542	0.674	0.667
Dnajb11	1.87064e-59	4.47307e-55	58.728	54.3494	0.324356	0.873	0.719
Pard3b	2.0004e-59	4.78336e-55	58.6989	54.3203	-1.15704	0.101	0.222
Sec11c	2.11971e-59	5.06865e-55	58.6737	54.2951	0.30612	0.928	0.826
Ostm1	2.41317e-59	5.77036e-55	58.6174	54.2388	0.457874	0.54	0.367
Homer3	2.48886e-59	5.95137e-55	58.604	54.2254	0.713583	0.333	0.198
Myo1e	2.63066e-59	6.29042e-55	58.5799	54.2013	0.430688	0.687	0.509
Itga4	2.65247e-59	6.34259e-55	58.5763	54.1977	-1.11364	0.539	0.602
Eif2s2	2.7228e-59	6.51076e-55	58.565	54.1864	0.244855	0.95	0.879
Insl6	2.86873e-59	6.85971e-55	58.5423	54.1637	1.30089	0.122	0.044
Klc4	3.70868e-59	8.8682e-55	58.4308	54.0522	0.60257	0.393	0.246
Ikbke	3.9933e-59	9.54877e-55	58.3987	54.0201	0.548827	0.313	0.176
Cdc34	4.49996e-59	1.07603e-54	58.3468	53.9682	0.440347	0.578	0.395
Cebpd	4.50562e-59	1.07738e-54	58.3462	53.9676	-1.19727	0.307	0.421
Jag1	4.90223e-59	1.17222e-54	58.3096	53.931	1.29191	0.153	0.064
Emc4	5.12558e-59	1.22563e-54	58.2903	53.9116	0.435447	0.563	0.387
Vrk1	5.23949e-59	1.25287e-54	58.2807	53.9021	-1.04766	0.343	0.451
Gm12185	5.82697e-59	1.39334e-54	58.2346	53.8559	-1.41713	0.159	0.285
Psmb10	5.93191e-59	1.41844e-54	58.2268	53.8482	-0.63186	0.717	0.723
Fcor	6.26661e-59	1.49847e-54	58.203	53.8244	0.488726	0.234	0.117
Sec61b	6.61844e-59	1.5826e-54	58.1792	53.8006	0.20696	0.963	0.932
Trim30c	7.71673e-59	1.84522e-54	58.1126	53.734	-2.98606	0.024	0.115
Slc8a1	1.02689e-58	2.45549e-54	57.9885	53.6099	-0.405457	0.947	0.937
Mdh1	1.10005e-58	2.63045e-54	57.9586	53.58	0.376841	0.838	0.669
Zfp704	1.42921e-58	3.41754e-54	57.8449	53.4663	0.303985	0.618	0.428
Selenok	1.47265e-58	3.5214e-54	57.8319	53.4533	0.242999	0.936	0.866
Creg2	1.73549e-58	4.14992e-54	57.7606	53.382	0.844587	0.188	0.087
Arl8b	1.99998e-58	4.78234e-54	57.699	53.3204	0.349866	0.824	0.648
Cd28	2.28711e-58	5.46895e-54	57.6407	53.2621	1.24121	0.126	0.047
Rapgef5	2.33805e-58	5.59073e-54	57.6311	53.2525	-1.17691	0.214	0.332
Cdk14	2.42238e-58	5.79239e-54	57.6158	53.2371	-0.881438	0.526	0.592
M6pr	2.68149e-58	6.41197e-54	57.5716	53.193	0.304682	0.883	0.736
Rasgrp4	3.04752e-58	7.28722e-54	57.5161	53.1374	-1.61208	0.16	0.284
Mrpl28	3.55789e-58	8.50761e-54	57.4488	53.0702	0.375682	0.729	0.541
Ndufa8	3.7891e-58	9.06049e-54	57.4215	53.0428	0.340715	0.877	0.729
Vps35	3.84999e-58	9.20609e-54	57.4145	53.0359	0.320808	0.898	0.754
Edf1	3.89538e-58	9.31464e-54	57.4094	53.0308	0.256923	0.941	0.87
Vti1b	3.96044e-58	9.4702e-54	57.4023	53.0236	0.358784	0.752	0.564
Ppp1r14b	4.45461e-58	1.06519e-53	57.3512	52.9726	0.304081	0.905	0.754
BC035044	5.73677e-58	1.37178e-53	57.2413	52.8627	-1.30415	0.104	0.224
Acp1	6.31675e-58	1.51046e-53	57.1995	52.8209	0.371113	0.678	0.489
Smad3	6.37211e-58	1.5237e-53	57.1957	52.8171	-1.2443	0.212	0.337
Selenom	7.1799e-58	1.71686e-53	57.1439	52.7653	0.71513	0.365	0.229
Rhobtb1	8.02234e-58	1.9183e-53	57.0957	52.7171	-1.74384	0.081	0.194
Polr2g	8.24595e-58	1.97177e-53	57.0838	52.7051	0.387775	0.762	0.574
Atp5o	8.75862e-58	2.09436e-53	57.0576	52.6789	0.279064	0.931	0.844
Zbtb20	8.79848e-58	2.10389e-53	57.0556	52.677	-0.734508	0.682	0.688
Ccl2	9.43008e-58	2.25492e-53	57.0255	52.6469	0.513369	0.58	0.407
Galk1	1.11458e-57	2.66519e-53	56.9529	52.5743	0.500708	0.442	0.285
Fgr	1.31967e-57	3.15559e-53	56.8795	52.5009	-1.28417	0.443	0.517
Pgap6	1.39814e-57	3.34322e-53	56.8545	52.4758	0.545177	0.321	0.185
Acads	1.43168e-57	3.42343e-53	56.8442	52.4655	0.445531	0.561	0.384
Samd8	1.57047e-57	3.75531e-53	56.804	52.4254	0.483919	0.452	0.294
Gbp2	1.64944e-57	3.94414e-53	56.7827	52.404	-2.78154	0.046	0.146
Cdk4	2.13918e-57	5.1152e-53	56.6698	52.2911	0.373848	0.707	0.506
Glrx2	2.55918e-57	6.1195e-53	56.5919	52.2133	0.368706	0.727	0.534
Rtn4rl1	3.05581e-57	7.30706e-53	56.5149	52.1363	-1.18112	0.132	0.251
Tceal8	3.30051e-57	7.89217e-53	56.4814	52.1028	0.517933	0.454	0.299
H2-Ob	3.58096e-57	8.5628e-53	56.446	52.0674	-2.8384	0.037	0.132
Cpne2	4.2859e-57	1.02485e-52	56.368	51.9893	0.337713	0.527	0.348
Pdxk	4.48054e-57	1.07139e-52	56.3487	51.9701	0.371429	0.521	0.348
Sod1	4.73379e-57	1.13194e-52	56.3248	51.9462	0.400699	0.803	0.654
Cyfip2	4.9262e-57	1.17795e-52	56.3075	51.9289	0.573582	0.298	0.167
Kdm3b	5.80248e-57	1.38749e-52	56.2364	51.8578	-0.916639	0.333	0.442
Mpeg1	6.06901e-57	1.45122e-52	56.2169	51.8383	0.238047	0.971	0.943
Kat6a	6.8415e-57	1.63594e-52	56.1648	51.7862	-0.74	0.525	0.581
Myo5a	7.67537e-57	1.83533e-52	56.1149	51.7363	0.218317	0.887	0.743
Acap2	9.47213e-57	2.26498e-52	56.0236	51.6449	-0.550166	0.711	0.703
Afg3l2	9.88401e-57	2.36346e-52	56.0051	51.6265	0.536712	0.437	0.285
Hcfc1r1	1.09282e-56	2.61316e-52	55.9615	51.5828	0.359231	0.814	0.659
Golm1	1.23079e-56	2.94307e-52	55.9098	51.5312	-0.963781	0.493	0.527
H2az2	1.49235e-56	3.56851e-52	55.8261	51.4475	-0.781244	0.511	0.567
Ophn1	1.6954e-56	4.05405e-52	55.7707	51.3921	-0.711044	0.76	0.701
Ero1a	1.8111e-56	4.3307e-52	55.7421	51.3634	0.439584	0.52	0.352
Dhrs3	1.89751e-56	4.53732e-52	55.7218	51.3432	0.294823	0.876	0.704
Scly	2.25067e-56	5.3818e-52	55.6477	51.2691	0.650735	0.351	0.216
St18	2.3369e-56	5.588e-52	55.6314	51.2527	0.311527	0.344	0.202
Cuta	2.43596e-56	5.82486e-52	55.6133	51.2347	0.317113	0.886	0.737
Sirpb1a	2.59343e-56	6.20142e-52	55.5861	51.2075	-3.191	0.036	0.13
Frmd4b	2.61896e-56	6.26245e-52	55.5819	51.2033	-0.74246	0.724	0.702
Mrpl41	3.3128e-56	7.92157e-52	55.4798	51.1012	0.431455	0.607	0.43
Mmp14	3.33732e-56	7.9802e-52	55.4766	51.098	0.282097	0.72	0.522
Mthfsl	3.68557e-56	8.81294e-52	55.4335	51.0549	0.378616	0.628	0.443
Mtch2	4.20496e-56	1.00549e-51	55.3762	50.9976	0.393104	0.717	0.524
Epb41l4aos	4.28048e-56	1.02355e-51	55.3685	50.9899	-1.57284	0.183	0.304
Tln2	4.86192e-56	1.16258e-51	55.3132	50.9346	-1.73007	0.078	0.188
Gm36172	5.39212e-56	1.28936e-51	55.2682	50.8896	1.12062	0.127	0.048
Pnp	5.63672e-56	1.34785e-51	55.249	50.8704	-0.496485	0.867	0.831
Gas7	6.20807e-56	1.48447e-51	55.207	50.8284	-2.15485	0.104	0.217
Adi1	6.23661e-56	1.4913e-51	55.2051	50.8264	0.542271	0.4	0.254
Taok3	8.19983e-56	1.96074e-51	55.0862	50.7076	-0.599703	0.737	0.729
Vcan	8.21943e-56	1.96543e-51	55.0852	50.7065	-3.67431	0.055	0.154
Dgcr6	8.57555e-56	2.05058e-51	55.0667	50.6881	0.549649	0.404	0.257
Rp2	9.70186e-56	2.31991e-51	55.0131	50.6345	-0.893637	0.42	0.505
Mrpl52	1.06402e-55	2.54429e-51	54.973	50.5944	-0.336759	0.949	0.921
Ccdc124	1.06894e-55	2.55606e-51	54.971	50.5924	0.33756	0.691	0.493
Atxn7l1	1.08488e-55	2.59417e-51	54.9646	50.586	-0.817767	0.541	0.596
Ampd3	1.093e-55	2.61357e-51	54.9614	50.5828	0.709331	0.305	0.179
Pin1	1.261e-55	3.01531e-51	54.8993	50.5207	0.413079	0.667	0.477
Carnmt1	1.34573e-55	3.21791e-51	54.871	50.4924	0.482063	0.452	0.297
Chpf2	1.44267e-55	3.44971e-51	54.8408	50.4622	0.574476	0.332	0.199
Mrpl27	1.6474e-55	3.93925e-51	54.7832	50.4046	0.36259	0.648	0.468
Tmem140	1.78311e-55	4.26378e-51	54.7488	50.3702	0.477244	0.397	0.251
Agl	1.9571e-55	4.67981e-51	54.7084	50.3298	0.481192	0.407	0.259
Fgl2	2.13912e-55	5.11505e-51	54.6698	50.2911	-1.68381	0.24	0.353
Cyth1	2.78587e-55	6.66157e-51	54.555	50.1764	0.280424	0.768	0.585
Mpv17	2.90342e-55	6.94265e-51	54.5371	50.1585	0.515796	0.443	0.288
Slc4a7	3.11933e-55	7.45894e-51	54.5059	50.1273	-1.11084	0.298	0.408
Tmem154	3.33507e-55	7.97483e-51	54.4769	50.0983	0.940622	0.195	0.094
Micos10	3.43101e-55	8.20423e-51	54.4646	50.086	0.267833	0.934	0.847
Pole4	3.4918e-55	8.34959e-51	54.457	50.0783	0.417524	0.643	0.456
Tbc1d4	3.50311e-55	8.37663e-51	54.4555	50.0769	-1.46464	0.202	0.322
Spred1	3.53309e-55	8.44832e-51	54.4518	50.0732	-1.0225	0.401	0.489
Gm10790	3.53448e-55	8.45164e-51	54.4517	50.0731	-1.2656	0.157	0.277
Evl	3.63524e-55	8.69259e-51	54.4395	50.0609	-0.823042	0.507	0.555
Cpt1a	5.3379e-55	1.2764e-50	54.2726	49.894	0.36754	0.594	0.415
Ddx60	5.42973e-55	1.29836e-50	54.2652	49.8866	-1.60283	0.201	0.321
Ank2	5.61396e-55	1.34241e-50	54.2507	49.8721	-1.1415	0.165	0.284
Dock11	6.04861e-55	1.44634e-50	54.2183	49.8397	-0.802149	0.563	0.601
Hnrnpu	7.27231e-55	1.73895e-50	54.1383	49.7597	-0.302468	0.918	0.886
Slc25a39	8.28789e-55	1.9818e-50	54.0816	49.7029	0.405791	0.688	0.509
Lamc1	8.82222e-55	2.10957e-50	54.0544	49.6758	0.572203	0.309	0.18
Stag2	9.27038e-55	2.21673e-50	54.0329	49.6543	-0.536073	0.711	0.711
Hdac9	1.10735e-54	2.6479e-50	53.9557	49.5771	-1.08954	0.516	0.574
Mpp1	1.13751e-54	2.72002e-50	53.944	49.5654	0.248842	0.841	0.639
Gns	1.56769e-54	3.74866e-50	53.8047	49.4261	0.256493	0.938	0.838
Igfbp4	1.7677e-54	4.22693e-50	53.7526	49.374	-2.59948	0.111	0.222
Fgf13	2.15161e-54	5.14492e-50	53.6672	49.2886	-1.35649	0.156	0.275
Gatm	2.15295e-54	5.14812e-50	53.667	49.2884	-0.977413	0.41	0.485
Clasp2	2.20282e-54	5.26737e-50	53.657	49.2784	-0.867908	0.452	0.516
Map3k14	2.23442e-54	5.34295e-50	53.6508	49.2722	-1.43936	0.173	0.295
Fgd6	2.2616e-54	5.40793e-50	53.6456	49.267	0.489172	0.284	0.16
Ahr	2.35016e-54	5.61969e-50	53.6289	49.2503	-2.90338	0.034	0.125
Rsad2	2.39229e-54	5.72044e-50	53.6212	49.2426	-3.08559	0.069	0.172
Snx12	2.49848e-54	5.97437e-50	53.6023	49.2237	0.378651	0.632	0.446
Ass1	2.53752e-54	6.06772e-50	53.5956	49.217	-2.55408	0.06	0.161
Xiap	2.90873e-54	6.95536e-50	53.5363	49.1577	-0.662376	0.648	0.66
Myo1f	3.10911e-54	7.43451e-50	53.5074	49.1287	-0.359851	0.9	0.867
Nav3	3.15486e-54	7.54391e-50	53.501	49.1224	-1.33396	0.308	0.406
Twf1	3.18796e-54	7.62306e-50	53.4965	49.1179	0.311092	0.679	0.487
Napa	3.22914e-54	7.72151e-50	53.4909	49.1123	0.325492	0.72	0.534
Cyb5r1	3.27951e-54	7.84197e-50	53.4842	49.1056	0.404155	0.458	0.299
Ccdc50	3.3802e-54	8.08272e-50	53.4711	49.0924	-0.650197	0.684	0.675
Nrbf2	4.05051e-54	9.68558e-50	53.3925	49.0139	0.382487	0.614	0.435
Uvrag	4.89817e-54	1.17125e-49	53.31	48.9313	-0.653516	0.745	0.736
Cass4	6.73974e-54	1.61161e-49	53.1714	48.7927	-2.67394	0.019	0.102
Padi2	7.18648e-54	1.71843e-49	53.1435	48.7649	-1.694	0.109	0.223
Slc25a24	7.64665e-54	1.82847e-49	53.1165	48.7379	0.436062	0.332	0.195
Mroh1	1.03658e-53	2.47866e-49	52.9844	48.6058	0.41025	0.57	0.398
Csk	1.12865e-53	2.69883e-49	52.9474	48.5688	-0.701043	0.575	0.602
Ggh	1.20015e-53	2.86979e-49	52.9208	48.5422	0.328797	0.77	0.595
Trim30b	1.65628e-53	3.9605e-49	52.7809	48.4023	-2.75432	0.029	0.117
Sh2b2	1.68898e-53	4.03869e-49	52.7724	48.3938	0.370479	0.472	0.315
Ivd	1.85755e-53	4.44178e-49	52.7311	48.3524	0.690311	0.334	0.207
Birc3	2.06963e-53	4.9489e-49	52.6841	48.3055	-1.4662	0.195	0.313
Fundc2	2.12185e-53	5.07377e-49	52.6733	48.2947	0.362253	0.783	0.597
Btbd9	2.31638e-53	5.53894e-49	52.6352	48.2566	-0.626761	0.702	0.705
Hnrnpc	2.93281e-53	7.01293e-49	52.5327	48.1541	-0.434712	0.808	0.78
Slc36a1	2.97371e-53	7.11073e-49	52.5267	48.1481	0.384202	0.554	0.381
Arhgap26	3.07643e-53	7.35637e-49	52.512	48.1333	-1.58497	0.377	0.463
Nfat5	3.23178e-53	7.72782e-49	52.4906	48.1119	-0.900684	0.415	0.495
Plcg2	3.79791e-53	9.08155e-49	52.4205	48.0418	-0.547006	0.747	0.737
Tet2	3.82924e-53	9.15647e-49	52.4169	48.0383	-0.972626	0.386	0.48
Tbl1xr1	3.89846e-53	9.322e-49	52.4091	48.0305	-0.720739	0.563	0.604
Mrpl53	4.36725e-53	1.0443e-48	52.3598	47.9812	0.43291	0.605	0.431
Uba5	4.7605e-53	1.13833e-48	52.3223	47.9437	0.340663	0.631	0.45
Nmi	5.13029e-53	1.22676e-48	52.2899	47.9112	-1.09175	0.367	0.463
Plxnc1	5.89222e-53	1.40895e-48	52.2297	47.8511	0.324111	0.678	0.485
Pnisr	5.92611e-53	1.41705e-48	52.2272	47.8486	-0.590978	0.662	0.676
Pgpep1	6.47603e-53	1.54855e-48	52.1887	47.8101	0.669255	0.301	0.179
Notch2	7.59068e-53	1.81508e-48	52.1197	47.7411	-0.985403	0.461	0.536
Steap3	9.4544e-53	2.26074e-48	52.0244	47.6457	0.692006	0.221	0.113
Zfand2a	1.08636e-52	2.5977e-48	51.964	47.5854	0.728404	0.235	0.125
Atf6	1.24475e-52	2.97645e-48	51.9049	47.5263	-0.926009	0.479	0.545
Bcap31	1.25604e-52	3.00344e-48	51.901	47.5224	0.31243	0.859	0.722
Rmc1	1.42744e-52	3.41329e-48	51.8454	47.4668	0.618156	0.28	0.159
Atxn10	1.44114e-52	3.44606e-48	51.8413	47.4627	0.370102	0.741	0.553
Rogdi	1.53905e-52	3.68017e-48	51.8127	47.4341	-1.29447	0.169	0.286
Sdhb	1.56245e-52	3.73614e-48	51.8062	47.4276	0.295576	0.863	0.731
Vasp	1.56731e-52	3.74774e-48	51.8048	47.4262	-0.810281	0.568	0.602
Dctn3	1.68609e-52	4.03177e-48	51.7731	47.3945	0.311563	0.858	0.712
Aoah	2.10431e-52	5.03184e-48	51.6769	47.2983	-1.60908	0.297	0.399
Relb	2.23324e-52	5.34012e-48	51.6511	47.2724	-1.53537	0.131	0.246
Nckap1l	2.61806e-52	6.26031e-48	51.582	47.2034	-0.46444	0.777	0.743
Nat9	2.71908e-52	6.50187e-48	51.5656	47.187	0.44997	0.458	0.308
Hsd17b12	3.01383e-52	7.20668e-48	51.5209	47.1423	0.302374	0.81	0.634
Zdhhc12	3.07577e-52	7.35478e-48	51.512	47.1334	0.574222	0.323	0.193
Atp2a2	3.11443e-52	7.44722e-48	51.5066	47.128	0.330552	0.859	0.683
Dusp23	3.1431e-52	7.51577e-48	51.5026	47.124	0.797266	0.247	0.136
Akr1c13	3.31934e-52	7.9372e-48	51.4789	47.1003	0.774385	0.204	0.102
Csf3r	3.38153e-52	8.08591e-48	51.4709	47.0923	-0.501996	0.581	0.605
Creb1	3.48256e-52	8.32749e-48	51.4581	47.0795	-0.851816	0.474	0.536
Gpr155	3.53999e-52	8.46481e-48	51.451	47.0724	-1.46559	0.13	0.243
Ttc39c	3.56764e-52	8.53093e-48	51.4476	47.069	0.453358	0.24	0.126
Srprb	3.68264e-52	8.80594e-48	51.4338	47.0552	0.444056	0.435	0.284
Jtb	4.57327e-52	1.09356e-47	51.3398	46.9612	0.351141	0.762	0.584
Gng5	4.88608e-52	1.16836e-47	51.311	46.9324	0.164731	0.98	0.972
Panx1	6.40526e-52	1.53163e-47	51.1935	46.8148	0.902266	0.218	0.114
Mtss1	6.55299e-52	1.56695e-47	51.1836	46.8049	0.285131	0.679	0.502
Ramp1	6.69324e-52	1.60049e-47	51.1744	46.7957	-0.876216	0.444	0.515
Dtx3l	6.84191e-52	1.63604e-47	51.1648	46.7862	-1.16979	0.287	0.395
Actn1	7.93969e-52	1.89854e-47	51.1002	46.7216	0.401384	0.366	0.229
Zdhhc14	1.08686e-51	2.59891e-47	50.9638	46.5852	0.35405	0.68	0.505
Tcp11l1	1.0878e-51	2.60115e-47	50.9635	46.5848	0.420926	0.487	0.331
Pwp1	1.10206e-51	2.63526e-47	50.9578	46.5792	0.452625	0.376	0.237
Exoc4	1.10601e-51	2.6447e-47	50.9562	46.5776	-0.53431	0.773	0.748
Nfkbiz	1.27578e-51	3.05064e-47	50.8942	46.5156	-1.78435	0.047	0.141
Cpeb4	1.3429e-51	3.21115e-47	50.872	46.4933	0.465335	0.574	0.404
Prmt2	1.65366e-51	3.95423e-47	50.7816	46.4029	0.59663	0.305	0.182
Rps27rt	1.67689e-51	4.00978e-47	50.7755	46.3969	-0.717444	0.569	0.613
Ubash3b	1.70725e-51	4.08239e-47	50.7677	46.3891	-0.612521	0.728	0.712
Slc38a7	1.84078e-51	4.40167e-47	50.735	46.3564	0.477577	0.45	0.301
Etnk1	1.86894e-51	4.46902e-47	50.7284	46.3498	-0.993345	0.408	0.492
Tomm5	1.90682e-51	4.5596e-47	50.7197	46.3411	0.345903	0.812	0.639
Tgfbr2	1.90786e-51	4.56208e-47	50.7195	46.3408	-0.595603	0.743	0.701
Pold4	2.66515e-51	6.37289e-47	50.5743	46.1957	-0.605971	0.724	0.717
Mpdu1	2.74193e-51	6.5565e-47	50.5619	46.1833	0.485386	0.499	0.338
Psmd6	2.91303e-51	6.96563e-47	50.5357	46.157	0.34642	0.788	0.604
Slc31a1	3.50969e-51	8.39237e-47	50.4547	46.0761	0.375661	0.593	0.419
Ifi30	3.72642e-51	8.91061e-47	50.4287	46.0501	-0.444665	0.961	0.951
Tmem199	3.88911e-51	9.29964e-47	50.4101	46.0315	0.540709	0.392	0.254
Itgam	4.0279e-51	9.63151e-47	50.3949	46.0163	-0.405197	0.933	0.894
Vapb	4.43179e-51	1.05973e-46	50.3534	45.9748	0.328323	0.719	0.544
Isg20	4.55963e-51	1.0903e-46	50.3411	45.9625	-2.18146	0.098	0.203
Nfam1	4.57882e-51	1.09489e-46	50.3392	45.9606	-0.791619	0.545	0.591
Dennd1b	4.89808e-51	1.17123e-46	50.31	45.9314	-0.955355	0.433	0.515
Rars	5.08036e-51	1.21482e-46	50.2941	45.9155	0.34884	0.694	0.507
Smc1a	5.44702e-51	1.30249e-46	50.2638	45.8852	-0.623535	0.63	0.643
Nr3c1	5.51499e-51	1.31875e-46	50.2585	45.8798	-0.754448	0.588	0.61
Tnrc18	5.92604e-51	1.41703e-46	50.2272	45.8486	-0.796389	0.472	0.537
Sfpq	6.01254e-51	1.43772e-46	50.2209	45.8423	-0.43591	0.809	0.772
Ppdpf	6.15826e-51	1.47256e-46	50.2105	45.8319	0.324368	0.697	0.53
Psmb3	6.27629e-51	1.50079e-46	50.2023	45.8237	0.28959	0.924	0.83
Pnpla2	6.78913e-51	1.62342e-46	50.1682	45.7896	0.401652	0.438	0.287
Ccni	8.81261e-51	2.10727e-46	50.0549	45.6763	-0.686297	0.529	0.563
H2-DMb2	9.18149e-51	2.19548e-46	50.0371	45.6585	-3.16606	0.03	0.115
Tep1	1.07256e-50	2.5647e-46	49.9696	45.591	-0.762399	0.532	0.587
Cisd1	1.21007e-50	2.89352e-46	49.9172	45.5386	0.448866	0.569	0.4
Gtf2b	1.21135e-50	2.89658e-46	49.9167	45.5381	0.399351	0.56	0.397
Macf1	1.27259e-50	3.04303e-46	49.8953	45.5167	-0.320397	0.922	0.893
Fam136a	1.31108e-50	3.13505e-46	49.8824	45.5038	0.542588	0.318	0.191
Cadm1	1.36512e-50	3.26429e-46	49.8648	45.4862	-0.956178	0.235	0.343
Fzd7	1.54868e-50	3.70321e-46	49.81	45.4314	0.805677	0.202	0.102
Mbtd1	1.82052e-50	4.35324e-46	49.7398	45.3612	-1.00972	0.359	0.453
Ankrd12	2.01782e-50	4.82502e-46	49.6951	45.3165	0.342651	0.828	0.652
Klhdc4	2.28054e-50	5.45323e-46	49.642	45.2633	0.611495	0.361	0.229
Pxdc1	2.37344e-50	5.67537e-46	49.6246	45.246	-1.98725	0.05	0.143
Ppp2r1a	2.63749e-50	6.30677e-46	49.5788	45.2002	0.391898	0.659	0.479
Rftn1	2.81937e-50	6.74167e-46	49.5498	45.1712	0.224865	0.851	0.677
Ndufa13	3.18114e-50	7.60674e-46	49.4974	45.1188	0.212552	0.958	0.923
Ncapg2	3.37562e-50	8.07179e-46	49.4716	45.093	0.253605	0.586	0.402
Tnfrsf11a	3.77327e-50	9.02265e-46	49.4233	45.0447	-0.760939	0.562	0.592
Kmt2e	4.15689e-50	9.93996e-46	49.3812	45.0026	-0.634867	0.632	0.648
Arhgap5	4.21419e-50	1.0077e-45	49.3753	44.9967	-0.863039	0.503	0.542
Metap2	4.80491e-50	1.14895e-45	49.3183	44.9397	0.287829	0.902	0.76
Stx3	4.88349e-50	1.16774e-45	49.3113	44.9327	0.473241	0.29	0.166
C4b	4.96799e-50	1.18795e-45	49.3038	44.9252	-3.67787	0.041	0.13
Naaa	5.48935e-50	1.31261e-45	49.2605	44.8819	-1.33317	0.24	0.351
Znfx1	5.63388e-50	1.34717e-45	49.2492	44.8706	-1.10474	0.346	0.44
Cep170	5.88161e-50	1.40641e-45	49.2305	44.8519	-0.780937	0.488	0.542
Pik3cg	5.89363e-50	1.40929e-45	49.2296	44.851	-0.902426	0.417	0.49
Arhgef6	6.34807e-50	1.51795e-45	49.1974	44.8187	-0.92743	0.423	0.495
Hmbs	7.30995e-50	1.74796e-45	49.1361	44.7575	0.472064	0.433	0.284
Ap1s2	7.55328e-50	1.80614e-45	49.1219	44.7432	-0.688161	0.673	0.692
Nlrp3	8.93935e-50	2.13758e-45	49.0487	44.6701	-1.32242	0.147	0.263
Gmip	9.31332e-50	2.227e-45	49.0309	44.6523	-0.713524	0.499	0.556
Eaf1	1.09541e-49	2.61933e-45	48.9604	44.5818	0.606772	0.306	0.185
Arhgap4	1.10068e-49	2.63195e-45	48.9583	44.5797	-1.05955	0.194	0.312
Itgb5	1.11768e-49	2.67261e-45	48.9517	44.5731	-0.354727	0.929	0.862
Sh3bgrl2	1.1842e-49	2.83165e-45	48.9266	44.548	0.843305	0.138	0.059
Lims1	1.32106e-49	3.15893e-45	48.8791	44.5005	-0.535607	0.748	0.721
Srrm2	1.33637e-49	3.19553e-45	48.8741	44.4955	-0.299708	0.925	0.89
Elovl1	1.4029e-49	3.35461e-45	48.853	44.4744	0.374828	0.584	0.414
Extl3	1.45779e-49	3.48586e-45	48.8363	44.4577	-0.830366	0.456	0.523
Derl2	1.76272e-49	4.21501e-45	48.7538	44.3752	0.336252	0.723	0.547
Kansl1	2.41589e-49	5.77688e-45	48.6169	44.2383	-0.471226	0.77	0.747
Gnptg	2.8553e-49	6.82759e-45	48.5443	44.1657	0.427154	0.497	0.342
Pias1	3.14787e-49	7.52718e-45	48.502	44.1234	-0.795182	0.513	0.566
Clint1	3.30021e-49	7.89145e-45	48.4815	44.1028	-0.451332	0.822	0.773
Spg21	3.3615e-49	8.03802e-45	48.4735	44.0949	0.330753	0.77	0.592
Akip1	3.93242e-49	9.40321e-45	48.4053	44.0267	0.54798	0.308	0.187
Cyb561d2	4.17859e-49	9.99184e-45	48.379	44.0004	0.431053	0.44	0.294
Elof1	4.26763e-49	1.02048e-44	48.3698	43.9912	0.349439	0.729	0.547
Tbc1d20	4.98857e-49	1.19287e-44	48.302	43.9234	0.336102	0.574	0.41
Ppp2cb	5.02105e-49	1.20063e-44	48.2992	43.9206	0.415506	0.472	0.322
Kmt2c	5.47807e-49	1.30992e-44	48.2614	43.8828	-0.636063	0.599	0.622
Sh2d1b1	5.87853e-49	1.40567e-44	48.2307	43.8521	-1.95404	0.064	0.16
Mbd3	6.39334e-49	1.52878e-44	48.1943	43.8157	0.364008	0.664	0.479
Timm10	6.40831e-49	1.53236e-44	48.1933	43.8146	0.438873	0.497	0.34
Pitpna	6.99772e-49	1.67329e-44	48.155	43.7764	-0.388185	0.954	0.943
Pi4k2a	7.45263e-49	1.78207e-44	48.1277	43.7491	0.352898	0.521	0.359
Tyrobp	1.05457e-48	2.52168e-44	47.9769	43.5983	0.144353	0.994	0.996
Plk3	1.49274e-48	3.56945e-44	47.826	43.4474	0.492902	0.376	0.242
Cuedc2	1.55326e-48	3.71417e-44	47.8088	43.4301	0.320651	0.82	0.66
Pcbp2	1.60796e-48	3.84495e-44	47.7937	43.4151	-0.302779	0.895	0.859
Clpp	1.72957e-48	4.13574e-44	47.7621	43.3834	0.44729	0.43	0.283
Gcsh	1.76628e-48	4.22353e-44	47.7529	43.3743	0.266296	0.547	0.374
Hif1a	2.13229e-48	5.09874e-44	47.6712	43.2925	0.273975	0.906	0.793
Plekha5	2.7011e-48	6.45886e-44	47.5685	43.1898	-1.9867	0.079	0.179
Arl2	4.26462e-48	1.01976e-43	47.3701	42.9915	0.461441	0.452	0.308
Mrpl18	4.33095e-48	1.03562e-43	47.3634	42.9848	0.347489	0.803	0.629
Pon3	4.6083e-48	1.10194e-43	47.3365	42.9578	0.362905	0.597	0.421
Snx3	4.89863e-48	1.17136e-43	47.3099	42.9313	0.212044	0.937	0.857
Odc1	5.88755e-48	1.40783e-43	47.2301	42.8514	0.451162	0.436	0.291
Kat2b	5.9887e-48	1.43202e-43	47.2227	42.8441	-1.17791	0.293	0.396
Map2k2	6.42239e-48	1.53572e-43	47.1923	42.8137	0.324525	0.835	0.659
Stag1	6.78803e-48	1.62315e-43	47.1683	42.7896	-0.48529	0.76	0.746
Timm8a1	6.84329e-48	1.63637e-43	47.1647	42.7861	0.537056	0.368	0.234
Dip2b	7.01514e-48	1.67746e-43	47.154	42.7753	-0.581112	0.683	0.671
Mfsd1	7.09634e-48	1.69688e-43	47.149	42.7703	0.262333	0.863	0.69
Cept1	7.38204e-48	1.76519e-43	47.1318	42.7532	-0.717069	0.573	0.601
Psmc3	8.40969e-48	2.01093e-43	47.0752	42.6966	0.309286	0.876	0.738
P2ry6	8.42565e-48	2.01474e-43	47.0744	42.6958	-0.513479	0.758	0.732
Rgs7bp	9.67247e-48	2.31288e-43	47.0145	42.6358	-2.03479	0.049	0.139
Nek7	1.06449e-47	2.5454e-43	46.9729	42.5942	-0.558771	0.655	0.649
Rab21	1.06795e-47	2.55369e-43	46.9714	42.5928	0.288023	0.82	0.644
Tmem126b	1.30084e-47	3.11058e-43	46.8858	42.5072	0.4397	0.364	0.232
Blvra	1.58913e-47	3.79993e-43	46.7988	42.4202	0.255767	0.765	0.583
Lsr	1.66569e-47	3.98299e-43	46.7784	42.3998	-1.96612	0.07	0.165
Commd1	1.68397e-47	4.0267e-43	46.7737	42.3951	0.312797	0.852	0.683
Stard9	1.81315e-47	4.3356e-43	46.7416	42.363	-0.741353	0.49	0.552
Fam172a	1.84775e-47	4.41834e-43	46.7334	42.3547	-0.558937	0.774	0.753
Pdp1	2.0554e-47	4.91488e-43	46.6871	42.3085	1.12505	0.12	0.048
Oasl1	2.50019e-47	5.97844e-43	46.602	42.2234	-2.79507	0.044	0.13
Stat2	2.69458e-47	6.44328e-43	46.5695	42.1909	-1.43933	0.219	0.329
Sco2	2.84462e-47	6.80207e-43	46.546	42.1674	0.517355	0.33	0.204
Psma6	2.91654e-47	6.97403e-43	46.5351	42.1565	0.310817	0.856	0.724
Uhrf1bp1l	3.8457e-47	9.19584e-43	46.415	42.0364	0.290501	0.554	0.39
Ptprm	3.92537e-47	9.38634e-43	46.4061	42.0275	-0.983723	0.141	0.247
Aim2	3.94708e-47	9.43825e-43	46.4037	42.0251	-0.781336	0.484	0.529
Smyd2	4.70408e-47	1.12484e-42	46.3275	41.9489	0.862676	0.196	0.103
Rrad	4.71299e-47	1.12697e-42	46.3267	41.9481	-1.95516	0.043	0.129
Phb	5.64944e-47	1.35089e-42	46.248	41.8694	0.392718	0.403	0.262
Slc24a3	5.78142e-47	1.38245e-42	46.238	41.8593	-1.13842	0.14	0.247
Gnaq	6.04417e-47	1.44528e-42	46.2187	41.84	-0.369727	0.915	0.883
Fmnl2	6.32804e-47	1.51316e-42	46.1987	41.8201	0.224573	0.725	0.55
Irgm1	6.53135e-47	1.56178e-42	46.185	41.8064	-1.38036	0.213	0.318
P2ry13	6.65566e-47	1.5915e-42	46.1768	41.7982	-1.0399	0.299	0.39
Car13	7.3312e-47	1.75304e-42	46.1348	41.7562	0.745956	0.174	0.085
Gmppb	9.82631e-47	2.34967e-42	46.0076	41.629	0.452687	0.361	0.227
Abcg1	1.28347e-46	3.06903e-42	45.8916	41.513	0.299616	0.771	0.597
Gm38335	1.73168e-46	4.14078e-42	45.7615	41.3829	1.32861	0.118	0.048
Orai1	1.94364e-46	4.64764e-42	45.7114	41.3328	-0.765836	0.549	0.573
Fat3	1.99716e-46	4.77561e-42	45.6996	41.321	-1.29542	0.16	0.264
Reep5	2.12454e-46	5.0802e-42	45.6727	41.2941	0.214411	0.943	0.885
Slc6a6	2.31367e-46	5.53245e-42	45.6357	41.2571	0.256133	0.889	0.778
St13	2.55995e-46	6.12134e-42	45.5918	41.2132	0.265171	0.933	0.827
B4galt7	2.72101e-46	6.50647e-42	45.5653	41.1867	0.623297	0.267	0.156
Stub1	3.03714e-46	7.26242e-42	45.5175	41.1389	0.316399	0.725	0.539
Ddx17	3.15276e-46	7.53889e-42	45.5013	41.1227	-0.477375	0.743	0.728
Rnf180	3.27719e-46	7.83642e-42	45.4845	41.1059	-0.809367	0.435	0.507
Cd101	3.43769e-46	8.22021e-42	45.4637	41.0851	-1.99937	0.091	0.19
Heca	3.47705e-46	8.31433e-42	45.4588	41.0802	-1.22372	0.187	0.296
Prxl2a	3.70524e-46	8.85996e-42	45.4312	41.0526	0.707584	0.273	0.16
Chchd4	3.83582e-46	9.17222e-42	45.4161	41.0375	0.523277	0.367	0.237
Nudcd2	4.0598e-46	9.7078e-42	45.3915	41.0129	0.423829	0.518	0.36
Ddt	4.4122e-46	1.05505e-41	45.3553	40.9767	0.298213	0.674	0.498
Ifngr2	4.60695e-46	1.10161e-41	45.3366	40.958	-0.442402	0.792	0.761
Psmb4	4.6579e-46	1.1138e-41	45.3318	40.9532	0.268212	0.919	0.818
Rab43	4.76115e-46	1.13849e-41	45.3223	40.9437	-1.13313	0.358	0.444
Arhgef40	4.78962e-46	1.1453e-41	45.3197	40.9411	-1.33818	0.111	0.214
Adrm1	4.82866e-46	1.15463e-41	45.3162	40.9376	0.45433	0.458	0.313
Wbp2	5.80771e-46	1.38874e-41	45.236	40.8574	0.34633	0.644	0.469
Capn3	5.80787e-46	1.38878e-41	45.236	40.8574	-1.01128	0.17	0.275
E230032D23Rik	7.00981e-46	1.67619e-41	45.1543	40.7757	1.54789	0.131	0.058
Psmc5	1.02755e-45	2.45709e-41	44.9882	40.6096	0.307269	0.824	0.658
Cln8	1.30465e-45	3.11969e-41	44.8845	40.5059	0.309216	0.552	0.387
Herc4	1.48011e-45	3.53924e-41	44.8297	40.4511	-0.966775	0.459	0.52
Nras	1.51685e-45	3.6271e-41	44.8191	40.4404	0.333507	0.715	0.531
Casp8	1.61555e-45	3.8631e-41	44.7917	40.4131	-0.584288	0.66	0.667
Actn4	1.75017e-45	4.185e-41	44.7569	40.3783	0.31471	0.742	0.553
Fam50a	2.23151e-45	5.33598e-41	44.6514	40.2728	0.312292	0.748	0.578
Mrps15	2.44004e-45	5.83463e-41	44.6126	40.234	0.319685	0.772	0.605
Mfge8	2.51457e-45	6.01284e-41	44.5995	40.2209	1.55005	0.215	0.121
Tent5a	2.55653e-45	6.11318e-41	44.5923	40.2137	-0.968354	0.41	0.484
Slc12a9	2.61008e-45	6.24123e-41	44.5833	40.2047	-1.34494	0.214	0.317
Smarca2	2.63359e-45	6.29743e-41	44.5795	40.2008	-0.753149	0.394	0.47
Znrf2	2.65191e-45	6.34125e-41	44.5764	40.1978	-0.686825	0.535	0.567
Hspd1	2.87372e-45	6.87165e-41	44.5416	40.1629	0.285758	0.867	0.711
Aph1c	2.99055e-45	7.15101e-41	44.5242	40.1456	0.327956	0.464	0.314
Septin9	3.2538e-45	7.78048e-41	44.4876	40.109	0.300588	0.572	0.4
Sec14l1	3.45469e-45	8.26085e-41	44.4616	40.083	0.283596	0.769	0.579
Magi1	3.70601e-45	8.86181e-41	44.4311	40.0525	-1.02624	0.143	0.249
Sgce	3.71586e-45	8.88536e-41	44.4299	40.0513	-1.39848	0.106	0.207
Gpatch11	3.76643e-45	9.0063e-41	44.4241	40.0455	0.468475	0.404	0.266
Acot13	4.32415e-45	1.03399e-40	44.3641	39.9855	0.302397	0.685	0.5
Il21r	4.48195e-45	1.07172e-40	44.3485	39.9699	-0.900514	0.394	0.474
Nap1l1	4.65226e-45	1.11245e-40	44.3323	39.9537	-0.409532	0.835	0.797
Il13ra1	4.78909e-45	1.14517e-40	44.3197	39.9411	-0.935546	0.38	0.461
Gusb	5.15003e-45	1.23148e-40	44.2882	39.9096	0.250856	0.914	0.788
Trappc3	5.46754e-45	1.3074e-40	44.2622	39.8836	0.317319	0.7	0.519
Vma21	5.54614e-45	1.32619e-40	44.256	39.8774	0.345282	0.662	0.491
H6pd	5.85381e-45	1.39976e-40	44.2326	39.8539	0.547226	0.279	0.167
Cebpb	5.90578e-45	1.41219e-40	44.2287	39.8501	0.119826	0.905	0.78
Myo1b	6.12272e-45	1.46407e-40	44.2131	39.8344	-1.6372	0.061	0.153
Tomm40	8.14678e-45	1.94806e-40	44.089	39.7104	0.349703	0.536	0.376
Arfgap3	8.61969e-45	2.06114e-40	44.0645	39.6859	0.437066	0.357	0.229
Csmd3	8.8611e-45	2.11887e-40	44.0525	39.6739	-1.23771	0.31	0.401
Sort1	9.129e-45	2.18293e-40	44.0396	39.661	0.434787	0.508	0.35
Mrpl34	9.90548e-45	2.3686e-40	44.0041	39.6255	0.313922	0.786	0.627
Irs2	1.08324e-44	2.59025e-40	43.9653	39.5867	0.640767	0.266	0.157
Akna	1.2835e-44	3.0691e-40	43.8916	39.513	-1.15819	0.208	0.315
Actb	1.29689e-44	3.10113e-40	43.8871	39.5085	-0.175785	0.997	0.999
Pbx3	1.31784e-44	3.15121e-40	43.8801	39.5015	-1.27139	0.239	0.344
Pusl1	1.33256e-44	3.18643e-40	43.8753	39.4967	0.776852	0.24	0.139
Antkmt	1.46877e-44	3.51213e-40	43.833	39.4544	0.30527	0.787	0.612
Susd6	1.4817e-44	3.54304e-40	43.8292	39.4506	-0.652131	0.652	0.654
Slc36a4	1.58405e-44	3.78779e-40	43.8002	39.4216	0.563869	0.252	0.147
Aldh9a1	1.79735e-44	4.29783e-40	43.7454	39.3668	0.310962	0.528	0.37
Nfe2l2	1.92183e-44	4.59548e-40	43.7163	39.3377	-0.457854	0.828	0.795
Slc25a33	1.98926e-44	4.75671e-40	43.7013	39.3227	0.730954	0.244	0.14
Mpc2	3.06538e-44	7.32994e-40	43.5135	39.1349	0.264395	0.874	0.738
Naa12	3.22186e-44	7.70412e-40	43.4919	39.1133	0.300216	0.705	0.532
Cd34	3.24982e-44	7.77096e-40	43.4881	39.1095	-1.22789	0.149	0.251
Inf2	3.56277e-44	8.5193e-40	43.4482	39.0696	0.28219	0.331	0.203
Rfx3	3.82515e-44	9.1467e-40	43.4174	39.0387	-1.26809	0.192	0.3
Mrpl55	4.80248e-44	1.14837e-39	43.3185	38.9399	0.346717	0.518	0.362
Skil	4.83585e-44	1.15635e-39	43.3155	38.9369	-0.612263	0.606	0.624
Ubac2	5.29573e-44	1.26632e-39	43.2761	38.8975	-0.94894	0.462	0.519
Traf3ip3	5.45135e-44	1.30353e-39	43.2635	38.8849	-1.2874	0.185	0.289
Mtus1	5.51357e-44	1.3184e-39	43.2586	38.88	-0.694747	0.473	0.524
Psmb7	5.68538e-44	1.35949e-39	43.2452	38.8666	0.306017	0.818	0.657
Vps26a	6.92129e-44	1.65502e-39	43.1598	38.7812	0.299771	0.789	0.616
Msr1	7.09022e-44	1.69541e-39	43.1493	38.7707	0.184845	0.806	0.636
Mphosph10	7.29448e-44	1.74426e-39	43.137	38.7584	0.348332	0.553	0.39
Steep1	7.47397e-44	1.78718e-39	43.1264	38.7478	0.360006	0.486	0.337
Zcrb1	8.21505e-44	1.96438e-39	43.0854	38.7068	0.29534	0.842	0.678
Sap18	8.4435e-44	2.01901e-39	43.0735	38.6949	0.320412	0.688	0.514
Pdcd6	9.1251e-44	2.182e-39	43.0398	38.6611	0.307795	0.785	0.625
Cops9	9.7134e-44	2.32267e-39	43.0126	38.634	0.226498	0.928	0.862
Bex3	9.97985e-44	2.38638e-39	43.0009	38.6223	0.514009	0.508	0.362
Macroh2a1	1.01809e-43	2.43445e-39	42.9922	38.6136	-0.455211	0.86	0.814
Hspa13	1.06698e-43	2.55136e-39	42.9718	38.5932	0.379619	0.413	0.276
Csad	1.07651e-43	2.57416e-39	42.968	38.5894	-1.09603	0.227	0.332
Wdfy4	1.339e-43	3.20181e-39	42.8732	38.4946	-0.781515	0.521	0.563
Avpi1	1.35526e-43	3.24069e-39	42.868	38.4894	-1.86569	0.102	0.198
Ripor2	1.41601e-43	3.38596e-39	42.8489	38.4703	-1.51183	0.133	0.235
Alg5	1.9655e-43	4.6999e-39	42.7065	38.3279	0.323396	0.662	0.491
Ubfd1	1.97922e-43	4.7327e-39	42.7035	38.3249	0.363456	0.489	0.34
Uba7	2.17383e-43	5.19805e-39	42.6628	38.2842	-1.26945	0.157	0.263
Xlr	2.24826e-43	5.37604e-39	42.6482	38.2695	-0.968359	0.185	0.29
Plbd2	2.46275e-43	5.88893e-39	42.6086	38.23	0.27196	0.67	0.495
Katnbl1	2.49784e-43	5.97283e-39	42.6024	38.2238	0.361782	0.405	0.274
Psmd11	2.71564e-43	6.49365e-39	42.5661	38.1875	0.346089	0.729	0.558
Ap2m1	2.83236e-43	6.77274e-39	42.5479	38.1692	0.236265	0.853	0.684
mt-Nd4	3.0392e-43	7.26733e-39	42.5172	38.1386	-0.181419	0.98	0.992
Tusc2	3.1952e-43	7.64036e-39	42.4955	38.1169	0.497886	0.355	0.229
Atad2b	3.57107e-43	8.53914e-39	42.4472	38.0686	-0.753373	0.553	0.583
Kdelr2	3.721e-43	8.89766e-39	42.4293	38.0507	0.314109	0.671	0.492
Psmc4	4.84411e-43	1.15832e-38	42.3148	37.9362	0.325568	0.738	0.567
Klf12	5.03823e-43	1.20474e-38	42.2977	37.9191	-1.20211	0.121	0.221
Lrrfip2	5.44638e-43	1.30234e-38	42.2639	37.8853	0.279038	0.7	0.536
Cxxc5	6.54461e-43	1.56495e-38	42.1841	37.8055	-1.10507	0.13	0.23
Aco2	6.56341e-43	1.56944e-38	42.1829	37.8043	0.337217	0.707	0.536
Cacnb2	6.59871e-43	1.57788e-38	42.1805	37.8019	-1.55984	0.114	0.212
Map3k1	6.89726e-43	1.64927e-38	42.1613	37.7827	-0.797526	0.499	0.555
Pdcd4	6.99678e-43	1.67307e-38	42.1551	37.7765	-1.18883	0.197	0.3
Eml4	7.40172e-43	1.7699e-38	42.1307	37.7521	-0.664048	0.526	0.559
Tbc1d16	7.60239e-43	1.81788e-38	42.119	37.7404	-1.12048	0.223	0.32
Trim5	7.87517e-43	1.88311e-38	42.1037	37.7251	-1.45412	0.124	0.225
Sdccag8	8.02281e-43	1.91841e-38	42.0957	37.7171	-0.815921	0.451	0.513
Gss	8.63016e-43	2.06364e-38	42.064	37.6854	0.859388	0.218	0.124
Mob3b	8.80811e-43	2.1062e-38	42.0551	37.6765	-1.44468	0.203	0.306
Etfrf1	9.38983e-43	2.2453e-38	42.0273	37.6487	0.603815	0.268	0.16
Irgm2	1.0783e-42	2.57844e-38	41.9673	37.5886	-1.81686	0.095	0.191
Tmem243	1.09626e-42	2.62137e-38	41.9601	37.5815	-0.912739	0.374	0.454
Gtf2h5	1.22698e-42	2.93395e-38	41.9112	37.5325	0.287201	0.847	0.689
Selenop	1.28501e-42	3.0727e-38	41.8911	37.5125	-0.669491	0.934	0.885
Serpine2	1.30582e-42	3.12247e-38	41.8841	37.5055	-1.00711	0.337	0.408
Sf3b1	1.34103e-42	3.20667e-38	41.8726	37.4939	-0.346751	0.879	0.839
Ms4a7	1.38426e-42	3.31005e-38	41.8588	37.4802	0.0763825	0.938	0.738
Rock1	1.45399e-42	3.47679e-38	41.8374	37.4588	-0.405727	0.811	0.775
Malat1	1.5061e-42	3.60139e-38	41.8221	37.4435	-0.248344	0.996	0.996
Sh3kbp1	2.24152e-42	5.35993e-38	41.6495	37.2708	-0.454622	0.81	0.772
Srp19	2.32889e-42	5.56885e-38	41.6329	37.2542	0.2813	0.827	0.668
Far1	2.50284e-42	5.98479e-38	41.6016	37.223	-0.741169	0.523	0.568
Ash1l	2.54064e-42	6.07517e-38	41.5951	37.2164	-0.586924	0.562	0.596
Chmp3	2.6073e-42	6.23458e-38	41.5838	37.2052	0.291906	0.832	0.673
Cmas	2.92209e-42	6.9873e-38	41.5343	37.1557	0.325195	0.578	0.42
Rac2	3.046e-42	7.28358e-38	41.5163	37.1377	-0.428595	0.804	0.773
G6pdx	3.09031e-42	7.38955e-38	41.51	37.1314	0.358707	0.547	0.396
Il10rb	3.15694e-42	7.54888e-38	41.5007	37.1221	0.210817	0.904	0.77
Chchd6	3.18337e-42	7.61209e-38	41.4971	37.1185	0.786336	0.245	0.145
Wtip	3.34588e-42	8.00067e-38	41.4755	37.0969	-1.83329	0.048	0.13
Ndufaf4	3.36729e-42	8.05187e-38	41.4727	37.0941	0.423307	0.36	0.234
Utp18	3.67924e-42	8.7978e-38	41.4342	37.0556	0.354621	0.496	0.344
Itpr2	3.78177e-42	9.04298e-38	41.4223	37.0437	-0.483511	0.512	0.55
Ggt5	4.00783e-42	9.58353e-38	41.3971	37.0185	-1.5996	0.068	0.156
Rnf169	4.6606e-42	1.11444e-37	41.3316	36.9529	-0.84502	0.467	0.523
Dynlrb1	4.72734e-42	1.1304e-37	41.3254	36.9468	0.25659	0.895	0.774
Arid1a	4.79546e-42	1.14669e-37	41.3192	36.9406	-0.628619	0.573	0.582
Mettl1	5.30509e-42	1.26855e-37	41.2753	36.8967	0.475685	0.337	0.218
Ubxn6	7.05765e-42	1.68763e-37	41.1513	36.7727	0.334067	0.534	0.38
Dph3	7.44768e-42	1.78089e-37	41.128	36.7494	0.330297	0.683	0.508
Mdfic	7.58747e-42	1.81432e-37	41.1199	36.7413	0.192363	0.884	0.725
Nme6	7.6773e-42	1.8358e-37	41.1148	36.7362	0.634206	0.274	0.169
Cpd	7.71209e-42	1.84412e-37	41.1128	36.7342	0.240852	0.759	0.548
Pde8a	9.04322e-42	2.16241e-37	41.0437	36.6651	0.355933	0.364	0.236
Neat1	1.01677e-41	2.43131e-37	40.9928	36.6142	0.276591	0.916	0.837
Ankrd24	1.04435e-41	2.49726e-37	40.9812	36.6025	0.851277	0.199	0.11
Cd83	1.06686e-41	2.55109e-37	40.9719	36.5933	-1.45432	0.169	0.27
Tor3a	1.11851e-41	2.67458e-37	40.9514	36.5727	-1.33217	0.252	0.347
Sfxn1	1.14899e-41	2.74746e-37	40.9397	36.5611	0.419102	0.427	0.29
Mia2	1.17952e-41	2.82047e-37	40.9283	36.5497	-0.478933	0.763	0.73
Rrp7a	1.28674e-41	3.07686e-37	40.8905	36.5119	0.443247	0.422	0.286
Mrps10	1.31626e-41	3.14744e-37	40.8807	36.502	0.361119	0.454	0.31
Golt1b	1.36736e-41	3.26962e-37	40.8641	36.4855	0.408176	0.387	0.257
Clec10a	1.52191e-41	3.63919e-37	40.8176	36.439	-2.65807	0.127	0.219
4930455G09Rik	1.58827e-41	3.79787e-37	40.7991	36.4205	0.45937	0.251	0.147
Tigd2	1.60486e-41	3.83755e-37	40.7946	36.4159	0.403993	0.427	0.292
Glb1	1.77863e-41	4.25306e-37	40.7499	36.3713	0.253317	0.628	0.458
Alpk1	1.7944e-41	4.29077e-37	40.7461	36.3675	-1.39823	0.214	0.314
Abhd15	1.88491e-41	4.50719e-37	40.7247	36.3461	-1.28392	0.121	0.221
Cyp4v3	1.92036e-41	4.59196e-37	40.7166	36.338	0.322389	0.491	0.346
Dstn	2.18662e-41	5.22864e-37	40.6602	36.2816	0.265838	0.88	0.728
Il3ra	2.36965e-41	5.66631e-37	40.6253	36.2467	0.345727	0.386	0.257
Zwint	2.41249e-41	5.76874e-37	40.6175	36.2389	0.340389	0.531	0.379
Atp11c	2.94798e-41	7.04922e-37	40.5305	36.1519	-0.885213	0.363	0.447
Fam78b	2.96651e-41	7.09351e-37	40.5278	36.1491	0.503526	0.206	0.113
Nbea	3.21872e-41	7.6966e-37	40.4923	36.1137	-1.19663	0.084	0.177
Tsfm	3.45487e-41	8.26128e-37	40.4616	36.083	0.37359	0.374	0.247
Erp44	3.61511e-41	8.64446e-37	40.4419	36.0633	0.278631	0.749	0.58
Rapgef2	3.9597e-41	9.46842e-37	40.4023	36.0237	-0.850424	0.449	0.514
Cfb	4.40701e-41	1.0538e-36	40.3559	35.9772	-1.96398	0.051	0.132
Gvin1	4.74064e-41	1.13358e-36	40.3242	35.9455	-2.56718	0.028	0.1
Ptpn22	5.18069e-41	1.23881e-36	40.2856	35.907	-1.98734	0.06	0.143
Yif1a	5.85081e-41	1.39905e-36	40.2328	35.8542	0.290279	0.549	0.393
Klf3	6.2403e-41	1.49218e-36	40.2048	35.8262	-0.73814	0.515	0.553
Mpst	6.28485e-41	1.50283e-36	40.2017	35.8231	0.456694	0.333	0.216
Sdc4	6.33032e-41	1.51371e-36	40.1986	35.82	0.232145	0.496	0.346
Crebrf	6.58969e-41	1.57573e-36	40.1811	35.8025	-0.879423	0.35	0.438
Slamf7	6.70235e-41	1.60267e-36	40.1738	35.7952	0.237634	0.476	0.328
Trim34a	6.74207e-41	1.61216e-36	40.1712	35.7926	-1.30161	0.164	0.264
Srm	6.81059e-41	1.62855e-36	40.1668	35.7882	0.425626	0.402	0.273
Pip4k2c	8.11895e-41	1.9414e-36	40.0905	35.7119	0.46335	0.338	0.219
Tbc1d8	8.13339e-41	1.94486e-36	40.0897	35.7111	-1.25814	0.188	0.287
Imp4	9.13714e-41	2.18487e-36	40.0392	35.6606	0.318428	0.547	0.386
Cryba4	9.32775e-41	2.23045e-36	40.0302	35.6516	-0.884913	0.19	0.291
Crtc3	9.67873e-41	2.31438e-36	40.0142	35.6356	-1.0683	0.342	0.428
Mvb12a	9.98327e-41	2.3872e-36	40.0007	35.6221	0.259241	0.728	0.556
Gzf1	1.07745e-40	2.57639e-36	39.9676	35.589	0.543563	0.251	0.15
Atf5	1.15725e-40	2.76721e-36	39.9366	35.558	0.613044	0.196	0.107
Eef1e1	1.19325e-40	2.8533e-36	39.9233	35.5447	0.412434	0.426	0.292
Vrk2	1.21363e-40	2.90204e-36	39.9159	35.5373	-0.776249	0.511	0.553
Glo1	1.27281e-40	3.04353e-36	39.8952	35.5166	0.329872	0.551	0.393
Med12l	1.38246e-40	3.30573e-36	39.8593	35.4807	-0.995145	0.115	0.213
Pdap1	1.38865e-40	3.32055e-36	39.8574	35.4788	0.271994	0.885	0.753
Alkbh7	1.45613e-40	3.4819e-36	39.8368	35.4582	0.44318	0.324	0.206
Coa3	1.68554e-40	4.03047e-36	39.7733	35.3946	0.278649	0.815	0.652
Zfp638	1.7027e-40	4.0715e-36	39.7689	35.3902	-0.598332	0.624	0.627
Tiam1	1.7302e-40	4.13726e-36	39.7619	35.3833	-1.30668	0.136	0.236
Apoc4	1.80319e-40	4.31178e-36	39.744	35.3653	1.00349	0.166	0.085
Rubcnl	1.8796e-40	4.4945e-36	39.7259	35.3473	-1.43995	0.108	0.203
Rel	2.0934e-40	5.00574e-36	39.6791	35.3005	-0.870512	0.469	0.52
Ecscr	2.09743e-40	5.01536e-36	39.6783	35.2997	-1.07855	0.231	0.32
Nf1	2.28323e-40	5.45967e-36	39.6414	35.2628	-0.671294	0.536	0.569
Parp12	2.38521e-40	5.70351e-36	39.6225	35.2439	-1.16762	0.277	0.368
Nlrp1c-ps	2.60728e-40	6.23452e-36	39.5838	35.2052	-1.20849	0.171	0.274
Ctsf	2.77041e-40	6.6246e-36	39.5575	35.1788	-1.12372	0.161	0.26
Tubgcp5	2.99927e-40	7.17185e-36	39.523	35.1444	-0.89939	0.354	0.424
Sgsh	3.07217e-40	7.34617e-36	39.5126	35.1339	0.413283	0.271	0.163
Smo	3.17361e-40	7.58873e-36	39.4984	35.1198	-1.52986	0.069	0.156
Grn	3.50514e-40	8.3815e-36	39.4553	35.0767	0.17664	0.978	0.968
Smim29	3.79055e-40	9.06396e-36	39.4213	35.0427	0.258935	0.796	0.631
Tut7	4.24982e-40	1.01622e-35	39.3716	34.993	-0.559548	0.652	0.652
Npnt	5.87269e-40	1.40428e-35	39.2312	34.8525	-1.36027	0.11	0.203
Nudt2	6.15495e-40	1.47177e-35	39.2108	34.8322	0.397536	0.398	0.268
Vac14	6.64738e-40	1.58952e-35	39.1773	34.7987	0.348517	0.5	0.355
Ndufs7	7.02694e-40	1.68028e-35	39.1532	34.7746	0.283851	0.865	0.729
Yipf5	7.12963e-40	1.70484e-35	39.1469	34.7683	0.290503	0.552	0.397
Hypk	7.25887e-40	1.73574e-35	39.1391	34.7605	0.29337	0.649	0.482
Add3	7.60527e-40	1.81857e-35	39.1189	34.7403	-1.22733	0.274	0.367
Pgm1	8.48438e-40	2.02878e-35	39.0714	34.6928	0.50072	0.367	0.245
Nfia	9.00049e-40	2.1522e-35	39.0457	34.6671	-0.891412	0.334	0.411
Irf9	9.28625e-40	2.22053e-35	39.0322	34.6535	-0.932525	0.348	0.438
Calu	9.88123e-40	2.3628e-35	39.0052	34.6266	0.326893	0.586	0.428
Timm10b	1.00941e-39	2.4137e-35	38.9959	34.6173	-0.341175	0.893	0.861
Phf23	1.05122e-39	2.51367e-35	38.9783	34.5997	0.303372	0.481	0.34
Slc16a3	1.07281e-39	2.5653e-35	38.9695	34.5909	0.22577	0.472	0.331
Adipor1	1.11978e-39	2.67761e-35	38.9509	34.5723	0.28709	0.812	0.637
Tapt1	1.18165e-39	2.82556e-35	38.9275	34.5489	0.531393	0.253	0.152
Septin8	1.25317e-39	2.99657e-35	38.902	34.5234	0.379161	0.392	0.266
Tsc22d1	1.29892e-39	3.10598e-35	38.8864	34.5078	0.29918	0.465	0.32
Sec61a1	1.39304e-39	3.33103e-35	38.856	34.4774	0.265373	0.651	0.48
Tnfsf13os	1.43821e-39	3.43906e-35	38.8422	34.4636	0.460354	0.208	0.114
Tapbp	1.5244e-39	3.64516e-35	38.8169	34.4383	-0.541456	0.733	0.717
Aldoc	1.6099e-39	3.8496e-35	38.7932	34.4146	1.97328	0.109	0.046
Gbp9	1.62011e-39	3.87402e-35	38.7905	34.4118	-2.32165	0.033	0.105
Dera	1.64049e-39	3.92274e-35	38.785	34.4064	0.277794	0.504	0.353
Vis1	1.69345e-39	4.04938e-35	38.7712	34.3926	-1.13326	0.222	0.322
Rab9	1.78916e-39	4.27823e-35	38.7474	34.3687	0.39371	0.509	0.364
Pdia3	1.79642e-39	4.29561e-35	38.7456	34.367	0.176733	0.962	0.947
Gm56768	1.83355e-39	4.38439e-35	38.7367	34.3581	0.361182	0.435	0.299
Creld2	1.92195e-39	4.59577e-35	38.7163	34.3376	0.258116	0.628	0.46
1700037H04Rik	2.19932e-39	5.25903e-35	38.6577	34.2791	0.505629	0.279	0.174
Isyna1	2.32193e-39	5.55221e-35	38.6342	34.2555	0.42186	0.405	0.276
Slfn9	2.45095e-39	5.8607e-35	38.6107	34.2321	-2.01963	0.064	0.148
C3	2.71842e-39	6.50029e-35	38.5657	34.1871	-1.82621	0.075	0.16
Dennd1a	2.87318e-39	6.87034e-35	38.5416	34.163	-0.504	0.857	0.826
Socs6	2.98156e-39	7.1295e-35	38.5256	34.1469	0.394302	0.466	0.328
Stt3b	3.02332e-39	7.22937e-35	38.5195	34.1409	0.263331	0.666	0.5
Zc3hav1	3.1921e-39	7.63296e-35	38.4959	34.1173	-0.769243	0.49	0.544
Mbd5	4.23232e-39	1.01203e-34	38.3734	33.9948	-0.712978	0.563	0.589
Crybb1	4.3267e-39	1.0346e-34	38.3638	33.9852	-1.0475	0.283	0.367
Fhit	4.84795e-39	1.15924e-34	38.3144	33.9358	-1.23802	0.121	0.215
Fbxl20	4.8961e-39	1.17075e-34	38.3102	33.9315	-1.01196	0.282	0.373
Ppm1h	4.9344e-39	1.17991e-34	38.3068	33.9281	-0.37358	0.885	0.839
Pfn1	5.30184e-39	1.26778e-34	38.2756	33.897	0.149327	0.979	0.967
Stat3	5.39564e-39	1.29021e-34	38.268	33.8893	-0.584906	0.655	0.66
Psmc6	5.81815e-39	1.39124e-34	38.2352	33.8566	0.328344	0.824	0.667
Fnbp1l	6.78282e-39	1.62191e-34	38.1686	33.79	-1.38672	0.076	0.163
Thoc6	7.20469e-39	1.72279e-34	38.1424	33.7638	0.338484	0.426	0.29
Lcp1	7.25403e-39	1.73458e-34	38.1394	33.7608	-0.234031	0.964	0.96
Tmem150b	7.58972e-39	1.81485e-34	38.1198	33.7412	-2.42772	0.043	0.117
Glrx3	8.55988e-39	2.04684e-34	38.0675	33.6889	0.277909	0.814	0.662
Dennd1c	8.7997e-39	2.10418e-34	38.0555	33.6769	-1.13367	0.233	0.329
Pik3r1	8.84245e-39	2.11441e-34	38.0534	33.6748	-0.636191	0.515	0.548
Sub1	1.02725e-38	2.45636e-34	37.9883	33.6097	-0.369873	0.926	0.897
Kitl	1.06052e-38	2.53591e-34	37.9745	33.5959	-1.58741	0.052	0.131
Cnpy2	1.14125e-38	2.72895e-34	37.9426	33.564	0.251785	0.851	0.701
Sp140	1.17291e-38	2.80467e-34	37.9307	33.5521	-1.017	0.409	0.471
Rab1a	1.19593e-38	2.85972e-34	37.9223	33.5437	0.228764	0.891	0.745
Mxi1	1.26092e-38	3.01511e-34	37.8993	33.5207	0.345633	0.543	0.395
Immp2l	1.59542e-38	3.81497e-34	37.7971	33.4185	-1.24242	0.32	0.404
Arhgap17	1.69302e-38	4.04834e-34	37.7713	33.3927	-0.636473	0.595	0.606
Irag2	1.70673e-38	4.08113e-34	37.7678	33.3892	-1.11465	0.26	0.351
Slc12a2	1.76555e-38	4.22179e-34	37.7531	33.3745	-1.02267	0.171	0.266
Pten	1.83021e-38	4.37639e-34	37.7375	33.3589	-0.512826	0.713	0.687
Pi4k2b	1.87168e-38	4.47555e-34	37.7278	33.3492	0.393261	0.2	0.109
Mapk6	1.97651e-38	4.72623e-34	37.7041	33.3255	0.319841	0.479	0.338
Dubr	1.98888e-38	4.75581e-34	37.7014	33.3228	0.508103	0.228	0.134
Tmem167	2.07408e-38	4.95954e-34	37.6832	33.3046	0.214508	0.881	0.752
Mrps7	2.12987e-38	5.09294e-34	37.6716	33.293	0.312207	0.587	0.433
Dnpep	2.1755e-38	5.20206e-34	37.6624	33.2838	0.300311	0.425	0.289
C1qa	2.39011e-38	5.71524e-34	37.6216	33.243	-0.351864	0.989	0.979
Dnajc3	2.41015e-38	5.76315e-34	37.618	33.2393	0.251883	0.858	0.729
Ppa1	2.48104e-38	5.93266e-34	37.6054	33.2268	0.36684	0.464	0.326
Susd3	2.93265e-38	7.01254e-34	37.5327	33.1541	-0.706213	0.476	0.519
Gmppa	3.03643e-38	7.26071e-34	37.5176	33.139	0.398547	0.351	0.231
Twf2	3.32987e-38	7.96238e-34	37.4776	33.099	-0.541547	0.633	0.63
Batf3	3.62931e-38	8.6784e-34	37.4402	33.0616	-1.53441	0.098	0.188
Ebpl	3.93115e-38	9.40017e-34	37.4055	33.0269	0.343274	0.483	0.344
Snx16	4.18907e-38	1.00169e-33	37.3779	32.9993	0.56966	0.215	0.124
Pgrmc1	4.38604e-38	1.04879e-33	37.3579	32.9793	0.369224	0.474	0.333
Calhm6	4.42079e-38	1.0571e-33	37.3545	32.9759	-2.10929	0.075	0.158
Cert1	4.46886e-38	1.06859e-33	37.3498	32.9712	0.261512	0.694	0.528
Mrpl42	4.49774e-38	1.0755e-33	37.347	32.9684	0.283349	0.779	0.611
Phyhd1	4.65073e-38	1.11208e-33	37.3325	32.9539	-0.854916	0.369	0.432
Adcy7	4.91951e-38	1.17635e-33	37.3081	32.9295	-0.859505	0.47	0.518
Trp53inp2	4.95212e-38	1.18415e-33	37.3052	32.9266	0.512175	0.257	0.158
Alkbh5	5.49389e-38	1.3137e-33	37.2601	32.8815	0.345842	0.53	0.38
Rps2	5.79312e-38	1.38525e-33	37.2371	32.8585	0.136085	0.985	0.982
Arrb2	6.38626e-38	1.52708e-33	37.1948	32.8161	-0.456851	0.736	0.703
Tle5	6.4084e-38	1.53238e-33	37.1933	32.8146	0.258053	0.861	0.747
Tma7	7.1259e-38	1.70394e-33	37.1472	32.7685	0.172848	0.961	0.921
Arid5b	7.16369e-38	1.71298e-33	37.1449	32.7662	0.205535	0.883	0.739
Sdhd	7.87059e-38	1.88202e-33	37.104	32.7254	0.304722	0.715	0.553
Nhsl2	8.04356e-38	1.92338e-33	37.0946	32.7159	-2.00505	0.054	0.132
Snrnp27	8.1265e-38	1.94321e-33	37.0901	32.7115	0.282477	0.802	0.63
Hikeshi	8.18917e-38	1.95819e-33	37.0868	32.7081	0.26737	0.589	0.434
Eif4g2	8.26718e-38	1.97685e-33	37.0826	32.704	0.226506	0.947	0.854
Padi4	8.40967e-38	2.01092e-33	37.0752	32.6966	0.841583	0.103	0.043
Dda1	8.45312e-38	2.02131e-33	37.073	32.6944	0.276235	0.509	0.36
Parl	8.62475e-38	2.06235e-33	37.0643	32.6856	0.268585	0.567	0.411
Hexb	9.4453e-38	2.25856e-33	37.0248	32.6462	-0.442299	0.993	0.983
Mrpl58	1.01709e-37	2.43206e-33	36.9926	32.614	0.262221	0.638	0.47
Rock2	1.09034e-37	2.60723e-33	36.9624	32.5838	-0.486688	0.695	0.663
8030442B05Rik	1.13292e-37	2.70903e-33	36.9458	32.5672	-0.99644	0.106	0.199
Gfus	1.14049e-37	2.72714e-33	36.9429	32.5643	0.343295	0.43	0.298
Agfg2	1.30157e-37	3.11232e-33	36.8855	32.5069	0.382265	0.346	0.229
Hvcn1	1.31947e-37	3.15512e-33	36.8796	32.501	0.4033	0.463	0.33
Stt3a	1.40194e-37	3.35231e-33	36.8533	32.4747	0.264735	0.67	0.509
Ssr4	1.67568e-37	4.0069e-33	36.7758	32.3972	0.188187	0.961	0.932
Pdlim4	2.00992e-37	4.80612e-33	36.6968	32.3182	0.42311	0.522	0.382
Atp8a2	2.0817e-37	4.97777e-33	36.6816	32.303	-1.02673	0.177	0.271
Ogt	2.13874e-37	5.11415e-33	36.6698	32.2912	-0.696317	0.589	0.611
Cnn2	2.15086e-37	5.14313e-33	36.6674	32.2888	-1.17009	0.311	0.392
Nek6	2.54709e-37	6.0906e-33	36.594	32.2153	0.289544	0.634	0.467
Arl10	2.71501e-37	6.49212e-33	36.5662	32.1876	-1.31192	0.116	0.208
Ergic1	2.96758e-37	7.09607e-33	36.5276	32.149	0.408932	0.454	0.32
Sptbn1	3.21613e-37	7.69041e-33	36.4927	32.1141	0.193438	0.552	0.395
Arap3	3.40462e-37	8.14113e-33	36.4679	32.0893	-1.07465	0.137	0.231
Napsa	3.84984e-37	9.20574e-33	36.4146	32.0359	-1.53854	0.493	0.511
H4c4	3.85683e-37	9.22245e-33	36.4138	32.0352	-0.901122	0.279	0.369
Rac1	4.04388e-37	9.66973e-33	36.3932	32.0146	-0.216383	0.94	0.903
Crip1	4.11863e-37	9.84848e-33	36.3852	32.0066	-0.995319	0.904	0.867
Cdk2ap2	4.13478e-37	9.88709e-33	36.3835	32.0049	-0.679486	0.667	0.665
H3f3a	4.1626e-37	9.95362e-33	36.3806	32.002	-0.244816	0.983	0.975
Hps3	4.23451e-37	1.01256e-32	36.3732	31.9946	-0.887411	0.371	0.441
Gm26542	4.44004e-37	1.0617e-32	36.3526	31.974	-1.1712	0.164	0.259
Uchl3	4.48195e-37	1.07172e-32	36.3485	31.9699	0.295718	0.587	0.424
Sult1a1	5.02214e-37	1.2009e-32	36.2991	31.9205	-2.25946	0.038	0.109
Ncf1	5.10247e-37	1.2201e-32	36.2922	31.9136	-0.37624	0.818	0.782
Kcnma1	5.487e-37	1.31205e-32	36.2607	31.882	-0.942451	0.124	0.215
Ndufa6	5.60079e-37	1.33926e-32	36.2518	31.8731	-0.344445	0.902	0.875
Pip4p2	5.93997e-37	1.42037e-32	36.2262	31.8476	0.328139	0.433	0.304
Cdkn1b	6.32838e-37	1.51324e-32	36.1987	31.8201	-1.06618	0.284	0.37
Gm36220	6.6265e-37	1.58453e-32	36.1787	31.8001	-1.06244	0.249	0.341
Ost4	7.83641e-37	1.87384e-32	36.1059	31.7273	0.186017	0.936	0.881
Azin1	7.98843e-37	1.91019e-32	36.0975	31.7189	0.318799	0.6	0.444
Map3k5	1.00048e-36	2.39236e-32	35.9998	31.6212	-0.819845	0.451	0.504
Nfatc1	1.01235e-36	2.42073e-32	35.9947	31.6161	-0.973214	0.335	0.412
Rab6b	1.01501e-36	2.42709e-32	35.9935	31.6149	-1.23219	0.101	0.19
Vps13b	1.04369e-36	2.49568e-32	35.9814	31.6028	-0.611048	0.622	0.631
Dynlt3	1.07065e-36	2.56015e-32	35.9704	31.5917	0.326308	0.59	0.436
Clic1	1.30293e-36	3.11556e-32	35.8851	31.5065	-0.179449	0.967	0.96
Rnf141	1.32662e-36	3.17222e-32	35.8773	31.4986	-1.31975	0.218	0.309
Hpgds	1.32811e-36	3.17577e-32	35.8768	31.4982	-0.456353	0.829	0.749
Suclg1	1.33864e-36	3.20096e-32	35.8733	31.4947	0.286834	0.713	0.552
Rpl22l1	1.3967e-36	3.33979e-32	35.8549	31.4763	-0.282612	0.892	0.867
Sars	1.41294e-36	3.37863e-32	35.8499	31.4713	0.291495	0.711	0.547
Zfand5	1.44579e-36	3.45716e-32	35.8399	31.4613	0.24674	0.81	0.65
Edem2	1.63597e-36	3.91194e-32	35.7862	31.4076	0.278082	0.634	0.467
Lgals3bp	1.64557e-36	3.93488e-32	35.7837	31.4051	-0.552394	0.741	0.714
Tpra1	1.67342e-36	4.00148e-32	35.7764	31.3978	0.44477	0.27	0.169
Gm31814	1.84335e-36	4.40781e-32	35.7344	31.3558	0.635569	0.109	0.048
Morrbid	1.86948e-36	4.4703e-32	35.7283	31.3497	0.0751406	0.614	0.453
Cyria	1.90226e-36	4.54869e-32	35.7207	31.3421	-1.47107	0.159	0.251
Hras	2.19997e-36	5.26057e-32	35.6576	31.279	0.294287	0.667	0.502
Ndufa7	2.22088e-36	5.31056e-32	35.6535	31.2749	0.189842	0.948	0.894
Mea1	2.3639e-36	5.65257e-32	35.6264	31.2478	0.248233	0.639	0.471
Tlr3	2.74245e-36	6.55775e-32	35.5619	31.1832	-1.15849	0.126	0.217
Spns1	3.11333e-36	7.44459e-32	35.5068	31.1282	0.446487	0.342	0.229
Atp5h	3.11736e-36	7.45423e-32	35.5062	31.1276	0.160022	0.967	0.941
Tm2d3	3.42376e-36	8.18691e-32	35.4655	31.0869	0.330909	0.507	0.366
[truncated: 6,979 more rows]
