# Supplementary material for: Inhibition of autophagy-lysosomal function exacerbates microglial and monocyte lipid metabolism reprograming and dysfunction after brain injury
Source: bioRxiv preprint, doi:10.1101/2025.09.04.674092, version 1 (2025-09-08)
Supplement: Table_S7 [file 674092_file02.xlsx]

## Sheet: All proteins
Table S7. LC-MS/MS based proteomic analyses of lysosomes isolated from TBI (day 1 and day 3) vs sham ipsilateral mouse cortex.
Accession	Protein name	Gene name	Abundances (Normalized): F1: Sample, D1	Abundances (Normalized): F2: Sample, D1	Abundances (Normalized): F3: Sample, D1	Abundances (Normalized): F4: Sample, D1	Abundances (Normalized): F5: Sample, D3	Abundances (Normalized): F6: Sample, D3	Abundances (Normalized): F7: Sample, D3	Abundances (Normalized): F8: Sample, D3	Abundances (Normalized): F9: Sample, Sham	Abundances (Normalized): F10: Sample, Sham	Abundances (Normalized): F11: Sample, Sham	Abundances (Normalized): F12: Sample, Sham
P16546	Spectrin alpha chain, non-erythrocytic 1 [OS=Mus musculus]	Sptan1	1275090587	1186597880	1214545462	1131802769	1054829153	1010662501	1104612675	1098088585	1171755742	1199710227	1314790614	1298306226
Q9JHU4	Cytoplasmic dynein 1 heavy chain 1 [OS=Mus musculus]	Dync1h1	4.63357e+08	4.45372e+08	4.58932e+08	4.46486e+08	4.65276e+08	4.6141e+08	4.5984e+08	4.40833e+08	4.70875e+08	4.79383e+08	4.59443e+08	4.60319e+08
Q62261	Spectrin beta chain, non-erythrocytic 1 [OS=Mus musculus]	Sptbn1	8.82004e+08	8.16558e+08	8.2701e+08	7.82439e+08	7.51967e+08	7.42539e+08	7.57012e+08	7.63075e+08	8.54603e+08	878394794	9.02906e+08	9.10768e+08
Q68FD5	Clathrin heavy chain 1 [OS=Mus musculus]	Cltc	1338984841	1324596970	1384865284	1415056174	1409538127	1302445685	1389432449	1599848466	1427552009	1356288853	1411872824	1489740859
Q8C8R3	Ankyrin-2 [OS=Mus musculus]	Ank2	3.39664e+08	3.63013e+08	3.65846e+08	3.33045e+08	3.1361e+08	3.25684e+08	3.50433e+08	3.68728e+08	309438246	3.11429e+08	2.95747e+08	3.0168e+08
O88737	Protein bassoon [OS=Mus musculus]	Bsn	1.5696e+08	158150017	1.59073e+08	1.66049e+08	1.2579e+08	1.15366e+08	1.37084e+08	1.24543e+08	1.57903e+08	1.58358e+08	186787934	1.82972e+08
Q9QXS1	Plectin [OS=Mus musculus]	Plec	9.89046e+07	9.20052e+07	1.02662e+08	104018768	9.55689e+07	7.7516e+07	9.45204e+07	9.73774e+07	8.07072e+07	8.39223e+07	1.05358e+08	9.70128e+07
Q6PIC6	Sodium/potassium-transporting ATPase subunit alpha-3 [OS=Mus musculus]	Atp1a3	3852900521	3689547278	3914729984	3663478444	3693573191	3900988333	3513959005	3366639246	3956680788	3869829849	3499324683	3537397201
Q9QYX7	Protein piccolo [OS=Mus musculus]	Pclo	6.98461e+07	6.37459e+07	6.69707e+07	6.70559e+07	5.51287e+07	5.25852e+07	5.78198e+07	5.52697e+07	6.94837e+07	6.91573e+07	7.47479e+07	7.46779e+07
Q61879	Myosin-10 [OS=Mus musculus]	Myh10	1.31894e+08	1.23994e+08	1.26688e+08	1.46323e+08	1.32477e+08	138174773	1.39262e+08	1.30212e+08	1.21288e+08	1.18979e+08	1.2571e+08	120623671
Q8BPN8	DmX-like protein 2 [OS=Mus musculus]	Dmxl2	1.53581e+08	1.55089e+08	1.4547e+08	1.5888e+08	1.46537e+08	1.55113e+08	1.47721e+08	1.59033e+08	1.46231e+08	1.52725e+08	152226731	1.53354e+08
Q99104	Unconventional myosin-Va [OS=Mus musculus]	Myo5a	1.39606e+08	1.37195e+08	1.43234e+08	141201950	1.42873e+08	1.30934e+08	1.41762e+08	1.42321e+08	1.35714e+08	1.37877e+08	1.39618e+08	1.46848e+08
Q6PIE5	Sodium/potassium-transporting ATPase subunit alpha-2 [OS=Mus musculus]	Atp1a2	6.03929e+08	5.8553e+08	5.85334e+08	5.82722e+08	6.04799e+08	6.46036e+08	5.60764e+08	5.34728e+08	625255061	6.07669e+08	5.60414e+08	5.83915e+08
Q9QYR6	Microtubule-associated protein 1A [OS=Mus musculus]	Map1a	1.16553e+08	1.1176e+08	1.16051e+08	1.05163e+08	1.09953e+08	1.05664e+08	1.09028e+08	1.03393e+08	1.05672e+08	1.03825e+08	1.13816e+08	1.10384e+08
Q8VDN2	Sodium/potassium-transporting ATPase subunit alpha-1 [OS=Mus musculus]	Atp1a1	7.04823e+08	637083237	6.68639e+08	7.42243e+08	6.74251e+08	6.46682e+08	7.01145e+08	6.668e+08	5.69103e+08	5.32637e+08	5.2719e+08	550531146
O08599	Syntaxin-binding protein 1 [OS=Mus musculus]	Stxbp1	1756867592	1605428133	1552503014	1732488616	1633974683	1665451207	1618769078	1707685309	1621249685	1621448999	1462289944	1705397373
P14873	Microtubule-associated protein 1B [OS=Mus musculus]	Map1b	9.80331e+07	9.69602e+07	1.18006e+08	9.44301e+07	1.14569e+08	9.81215e+07	9.75134e+07	104388847	1.07737e+08	1.09586e+08	1.11421e+08	1.16779e+08
Q9DBG3	AP-2 complex subunit beta [OS=Mus musculus]	Ap2b1	309006426	3.15894e+08	3.03445e+08	3.11832e+08	2.96617e+08	2.9035e+08	3.03748e+08	3.48647e+08	357225562	3.57466e+08	3.48447e+08	3.59323e+08
P39053	Dynamin-1 [OS=Mus musculus]	Dnm1	6.68931e+08	6.85626e+08	6.69531e+08	7.03771e+08	6.66609e+08	6.7331e+08	6.49603e+08	705783182	693389108	6.72727e+08	7.17564e+08	7.48437e+08
P20357	Microtubule-associated protein 2 [OS=Mus musculus]	Map2	1.19389e+08	1.21112e+08	1.26614e+08	1.13208e+08	1.09099e+08	1.14713e+08	1.15344e+08	1.05748e+08	1.4418e+08	1.44984e+08	1.50127e+08	1.33479e+08
P46460	Vesicle-fusing ATPase [OS=Mus musculus]	Nsf	8.00717e+08	8.19003e+08	8.09102e+08	7.88559e+08	7.83771e+08	8.33944e+08	7.88969e+08	8.07509e+08	8.8834e+08	8.13331e+08	8.69806e+08	8.43588e+08
P17427	AP-2 complex subunit alpha-2 [OS=Mus musculus]	Ap2a2	151174148	1.60389e+08	1.49189e+08	155871604	1.54298e+08	1.54685e+08	1.52793e+08	173022115	1.89003e+08	1.88536e+08	1.93975e+08	1.89495e+08
P19096	Fatty acid synthase [OS=Mus musculus]	Fasn	8.94455e+07	9.19244e+07	8.47326e+07	8.56328e+07	9.58369e+07	9.92278e+07	9.50098e+07	9.63646e+07	1.0855e+08	1.00395e+08	1.01422e+08	1.02971e+08
Q9QXZ0	Microtubule-actin cross-linking factor 1, isoforms 1/2/3/4 [OS=Mus musculus]	Macf1	2.92927e+07	2.9015e+07	2.83935e+07	2.84742e+07	2.60975e+07	2.31947e+07	2.89031e+07	28531939	2.9364e+07	3.0469e+07	3.39702e+07	3.00279e+07
E9Q3L2	Phosphatidylinositol 4-kinase alpha [OS=Mus musculus]	Pi4ka	1.50075e+08	1.27518e+08	1.45013e+08	1.44587e+08	1.69399e+08	1.36845e+08	1.48805e+08	1.37346e+08	1.11519e+08	1.37164e+08	1.18769e+08	129940049
Q9R0K7	Plasma membrane calcium-transporting ATPase 2 [OS=Mus musculus]	Atp2b2	536805670	4.34631e+08	4.81819e+08	472457135	5.09588e+08	4.80895e+08	5.07129e+08	4.46284e+08	420754836	3.48902e+08	3.61693e+08	3.40138e+08
P12960	Contactin-1 [OS=Mus musculus]	Cntn1	3.76515e+08	3.68254e+08	3.68649e+08	3.48732e+08	3.41244e+08	3.9154e+08	3.4718e+08	3.61414e+08	3.972e+08	4.13848e+08	3.43962e+08	3.88024e+08
P17426	AP-2 complex subunit alpha-1 [OS=Mus musculus]	Ap2a1	294017331	3.0028e+08	3.03217e+08	3.04532e+08	3.04657e+08	2.86213e+08	2.99298e+08	3.11734e+08	3.24663e+08	3.20005e+08	3.17348e+08	3.24188e+08
G5E829	Plasma membrane calcium-transporting ATPase 1 [OS=Mus musculus]	Atp2b1	4.80952e+08	5.41776e+08	5.02644e+08	4.92862e+08	5.05091e+08	5.69512e+08	4.89822e+08	5.0157e+08	4.59377e+08	4.77639e+08	4.62147e+08	4.30136e+08
Q8VDD5	Myosin-9 [OS=Mus musculus]	Myh9	4.1321e+07	3.50978e+07	2.65695e+07	2.72071e+07	5.96183e+07	6.56958e+07	7.1859e+07	4.74648e+07	2.47768e+07	2.31906e+07	2.57119e+07	1.94762e+07
Q7TSJ2	Microtubule-associated protein 6 [OS=Mus musculus]	Map6	2.56313e+08	2.43022e+08	2.62882e+08	2.38861e+08	2.16205e+08	2.45721e+08	2.24216e+08	2.12436e+08	2.84714e+08	2.958e+08	266792437	2.81283e+08
Q9Z1B3	1-phosphatidylinositol 4,5-bisphosphate phosphodiesterase beta-1 [OS=Mus musculus]	Plcb1	9.2275e+07	8.23355e+07	8.18103e+07	9.07371e+07	8.20702e+07	9.22289e+07	8.91621e+07	8.55704e+07	9.28049e+07	8.80239e+07	8.37573e+07	8.78081e+07
Q7TPR4	Alpha-actinin-1 [OS=Mus musculus]	Actn1	155082633	1.45363e+08	1.43288e+08	1.65427e+08	1.43437e+08	1.1448e+08	1.50292e+08	1.55507e+08	1.42233e+08	1.29924e+08	148188538	1.46746e+08
O08553	Dihydropyrimidinase-related protein 2 [OS=Mus musculus]	Dpysl2	1125402166	1244545272	1187289832	1250017614	1227009779	1221504219	1186836663	1222851440	1206318991	1263230985	1222384176	1269491800
Q80TJ1	Calcium-dependent secretion activator 1 [OS=Mus musculus]	Cadps	1.0588e+08	110891496	1.04393e+08	1.13631e+08	1.04823e+08	1.02131e+08	1.03192e+08	1.11313e+08	1.03346e+08	1.01502e+08	1.14415e+08	1.07276e+08
P07724	Albumin [OS=Mus musculus]	Alb	834095708	7.98728e+08	6.52682e+08	8.13448e+08	7.55815e+08	7.56651e+08	8.15921e+08	6.38643e+08	4.04748e+07	3.67996e+07	2.20935e+07	1.98052e+07
E9Q401	Ryanodine receptor 2 [OS=Mus musculus]	Ryr2	1.92133e+07	1.68429e+07	1.73613e+07	1.73012e+07	1.72425e+07	1.50014e+07	1.78705e+07	1.74121e+07	1.66666e+07	1.49719e+07	1.79213e+07	1.58669e+07
P56480	ATP synthase subunit beta, mitochondrial [OS=Mus musculus]	Atp5f1b	4.86267e+08	5.30784e+08	5.10404e+08	5.51435e+08	4.7764e+08	3.5023e+08	4.95481e+08	4.86684e+08	4.23728e+08	4.2049e+08	5.54623e+08	5.25552e+08
Q8CHC4	Synaptojanin-1 [OS=Mus musculus]	Synj1	1.53851e+08	1.52868e+08	1.43125e+08	1.58994e+08	1.68355e+08	1.63539e+08	160078628	1.44095e+08	1.58835e+08	1.62255e+08	1.53446e+08	1.56149e+08
Q71LX4	Talin-2 [OS=Mus musculus]	Tln2	9.99871e+07	9.18924e+07	9.93835e+07	9.53692e+07	9.05811e+07	1.11637e+08	1.00858e+08	9.06968e+07	1.04754e+08	1.00021e+08	9.75347e+07	8.94595e+07
P50516	V-type proton ATPase catalytic subunit A [OS=Mus musculus]	Atp6v1a	3.52102e+08	3.57512e+08	3.33589e+08	3.60202e+08	3.50575e+08	3.84629e+08	3.54869e+08	3.95502e+08	3.84909e+08	3.58942e+08	3.70127e+08	4.0969e+08
O88935	Synapsin-1 [OS=Mus musculus]	Syn1	8.61564e+08	909407449	8.51268e+08	9.08875e+08	7.91998e+08	8.59926e+08	7.91432e+08	8.99787e+08	8.74437e+08	8.80147e+08	8.91416e+08	9.86388e+08
Q99P72	Reticulon-4 [OS=Mus musculus]	Rtn4	1.31416e+08	1.37557e+08	1.42743e+08	1.26476e+08	1.36499e+08	1.42173e+08	1.3401e+08	129629850	1.36657e+08	1.42384e+08	1.3886e+08	1.3537e+08
P28660	Nck-associated protein 1 [OS=Mus musculus]	Nckap1	1.28631e+08	123956497	123548629	124696781	1.26384e+08	1.28879e+08	1.27255e+08	1.25125e+08	1.41761e+08	1.36782e+08	1.39542e+08	1.35987e+08
Q5SQX6	Cytoplasmic FMR1-interacting protein 2 [OS=Mus musculus]	Cyfip2	135612455	135397797	1.31389e+08	135409244	1.28325e+08	1.41512e+08	1.26549e+08	1.40938e+08	1.53937e+08	1.45534e+08	149896603	1.5158e+08
F6SEU4	Ras/Rap GTPase-activating protein SynGAP [OS=Mus musculus]	Syngap1	1.81526e+08	1.93378e+08	1.87837e+08	1.67407e+08	1.57063e+08	1.59163e+08	1.62835e+08	1.69744e+08	2.02197e+08	1.83022e+08	2.01261e+08	1.98786e+08
O35643	AP-1 complex subunit beta-1 [OS=Mus musculus]	Ap1b1	4.83526e+07	4.71374e+07	4.90255e+07	5.21732e+07	4.94577e+07	3.82654e+07	4.8431e+07	5.1867e+07	4.61139e+07	4.68228e+07	4.6423e+07	5.14746e+07
P13595	Neural cell adhesion molecule 1 [OS=Mus musculus]	Ncam1	4.11976e+08	4.10917e+08	3.99884e+08	3.67031e+08	3.5387e+08	4.28648e+08	3.72663e+08	3.87963e+08	4.84528e+08	5.03801e+08	4.10016e+08	433090477
P63017	Heat shock cognate 71 kDa protein [OS=Mus musculus]	Hspa8	5.99002e+08	6.12416e+08	6.07299e+08	6.35385e+08	5.95272e+08	6.35497e+08	6.16793e+08	6.39792e+08	6.21397e+08	6.44087e+08	6.48452e+08	6.67056e+08
Q7TMM9	Tubulin beta-2A chain [OS=Mus musculus]	Tubb2a	2668524547	2765717663	2908558453	2769120725	2643385257	2621401167	2468790729	2875201917	2943636616	3151436564	2924914774	3492265042
P60710	Actin, cytoplasmic 1 [OS=Mus musculus]	Actb	2533326666	3022962420	2756157424	2646557160	2771494100	2769730154	2911194069	2963733772	2718018203	2933907646	2899909971	3015458094
O08788	Dynactin subunit 1 [OS=Mus musculus]	Dctn1	4.43861e+07	4.43433e+07	5.11694e+07	5.38238e+07	4.82453e+07	5.44251e+07	4.96753e+07	5.20697e+07	4.6935e+07	5.28254e+07	4.74523e+07	4.86153e+07
P68369	Tubulin alpha-1A chain [OS=Mus musculus]	Tuba1a	3418524205	3740383704	3698967751	3845261474	3491594379	3498692807	3470892231	3480686671	3850060254	3645635426	3945446962	3668446368
Q9CWF2	Tubulin beta-2B chain [OS=Mus musculus]	Tubb2b	1.60579e+07	1.31808e+07	1.07534e+07	1.26146e+07	1.43784e+07	1.15383e+07	1.20157e+07	1.21732e+07	1.3415e+07	1.83282e+07	1.41298e+07	1.50774e+07
P68372	Tubulin beta-4B chain [OS=Mus musculus]	Tubb4b	6.49362e+08	6.78543e+08	7.4369e+08	6.99929e+08	6.6331e+08	6.12841e+08	6.42141e+08	7.16154e+08	6.75585e+08	6.95495e+08	6.6459e+08	7.04953e+08
Q8K1M6	Dynamin-1-like protein [OS=Mus musculus]	Dnm1l	6.97079e+07	7.02632e+07	6.58824e+07	6.95462e+07	6.85114e+07	7.75794e+07	6.88717e+07	7.53821e+07	7.86912e+07	7.69023e+07	7.72937e+07	7.49899e+07
Q9D6F9	Tubulin beta-4A chain [OS=Mus musculus]	Tubb4a	1.86971e+08	1.7786e+08	1.91134e+08	1.93513e+08	1.86708e+08	1.72466e+08	1.71983e+08	2.33684e+08	1.90751e+08	1.73694e+08	1.64573e+08	1.99407e+08
P99024	Tubulin beta-5 chain [OS=Mus musculus]	Tubb5	2.33184e+08	2.28885e+08	2.60708e+08	2.61759e+08	283800931	3.02871e+08	2.6625e+08	2.18532e+08	2.58415e+08	2.7814e+08	258436278	3.08745e+08
Q3UHJ0	AP2-associated protein kinase 1 [OS=Mus musculus]	Aak1	6.0566e+07	5.99248e+07	5.71768e+07	5.95228e+07	6.08088e+07	6.37801e+07	6.32525e+07	5.79705e+07	6.78937e+07	7.00678e+07	7.08033e+07	7.01751e+07
P16330	2',3'-cyclic-nucleotide 3'-phosphodiesterase [OS=Mus musculus]	Cnp	9.38423e+08	7.30192e+08	7.65703e+08	811903246	1097721009	7.43116e+08	8.91144e+08	7.60684e+08	5.43448e+08	7.139e+08	6.35376e+08	6.81506e+08
Q9QWI6	SRC kinase signaling inhibitor 1 [OS=Mus musculus]	Srcin1	134576489	1.38665e+08	1.35823e+08	1.46472e+08	120100948	1.20448e+08	1.37317e+08	1.21342e+08	1.40202e+08	1.36818e+08	1.55978e+08	1.38916e+08
P52480	Pyruvate kinase PKM [OS=Mus musculus]	Pkm	5.37094e+08	5.60602e+08	5.97399e+08	561312178	5.7814e+08	6.28266e+08	605499590	5.81314e+08	6.48778e+08	6.18328e+08	6.18091e+08	5.98494e+08
Q6ZQ38	Cullin-associated NEDD8-dissociated protein 1 [OS=Mus musculus]	Cand1	8.64568e+07	5.27002e+07	8.40214e+07	9.24401e+07	9.56484e+07	9.48277e+07	8.71885e+07	9.20456e+07	6.40271e+07	6.3648e+07	5.83718e+07	8.68125e+07
Q9WV92	Band 4.1-like protein 3 [OS=Mus musculus]	Epb41l3	1.61345e+08	1.42608e+08	1.51739e+08	1.47026e+08	1.63416e+08	169975690	1.73286e+08	1.46202e+08	1.5101e+08	1.76892e+08	1.56043e+08	1.58699e+08
P57780	Alpha-actinin-4 [OS=Mus musculus]	Actn4	3.67057e+07	3.62713e+07	3.63246e+07	3.905e+07	3.67264e+07	3.33613e+07	3.88169e+07	3.79936e+07	3.21862e+07	3.51211e+07	4.12136e+07	3.87441e+07
Q02053	Ubiquitin-like modifier-activating enzyme 1 [OS=Mus musculus]	Uba1	8.61437e+07	9.35505e+07	8.70056e+07	8.76479e+07	9.36554e+07	1.13384e+08	9.03076e+07	9.53873e+07	9.48196e+07	9.59305e+07	8.81093e+07	9.30648e+07
P43006	Excitatory amino acid transporter 2 [OS=Mus musculus]	Slc1a2	1121030204	8.97867e+08	1051977966	8.68738e+08	9.60626e+08	8.92175e+08	966319682	7.62338e+08	1153684475	994279017	1079323742	9.10044e+08
Q9ERD7	Tubulin beta-3 chain [OS=Mus musculus]	Tubb3	1.8134e+08	188935774	2.0859e+08	2.13486e+08	1.71898e+08	1.7471e+08	1.82481e+08	2.23397e+08	1.87527e+08	1.82056e+08	1.75317e+08	2.22922e+08
G5E8K5	Ankyrin-3 [OS=Mus musculus]	Ank3	2.88224e+07	2.61633e+07	2.71424e+07	2.75729e+07	2.40465e+07	2.13712e+07	2.4386e+07	2.1729e+07	2.05171e+07	2.03155e+07	2.32715e+07	2.33075e+07
Q810U3	Neurofascin [OS=Mus musculus]	Nfasc	1.3178e+08	1.24191e+08	1.24149e+08	1.22696e+08	1.21324e+08	1.32826e+08	1.13956e+08	1.29308e+08	1.34704e+08	1.34066e+08	1.13947e+08	1.32309e+08
Q01853	Transitional endoplasmic reticulum ATPase [OS=Mus musculus]	Vcp	1.02762e+08	105742202	9.82915e+07	1.01108e+08	1.12872e+08	1.22893e+08	113973254	1.18041e+08	1.14543e+08	1.15147e+08	1.11362e+08	1.12899e+08
O55143	Sarcoplasmic/endoplasmic reticulum calcium ATPase 2 [OS=Mus musculus]	Atp2a2	1.3577e+08	138013267	1.31945e+08	1.42436e+08	1.31109e+08	1.33596e+08	1.47087e+08	1.32766e+08	1.00703e+08	9.63062e+07	116169288	1.02662e+08
Q99KI0	Aconitate hydratase, mitochondrial [OS=Mus musculus]	Aco2	249416870	2.9366e+08	2.69159e+08	2.78484e+08	2.48978e+08	1.82699e+08	2.61439e+08	2.44555e+08	2.13953e+08	2.20629e+08	2.90006e+08	2.612e+08
Q920I9	WD repeat-containing protein 7 [OS=Mus musculus]	Wdr7	6.08256e+07	5.58428e+07	5.61382e+07	6.04054e+07	5.65297e+07	5.42498e+07	5.83715e+07	6.32851e+07	5.80774e+07	5.93113e+07	6.38369e+07	6.28366e+07
P07901	Heat shock protein HSP 90-alpha [OS=Mus musculus]	Hsp90aa1	2.65843e+08	2.96135e+08	2.90152e+08	2.9774e+08	2.97596e+08	2.96543e+08	3.30543e+08	2.97745e+08	3.23131e+08	3.06421e+08	3.29855e+08	2.94095e+08
P62814	V-type proton ATPase subunit B, brain isoform [OS=Mus musculus]	Atp6v1b2	3.69501e+08	4.4092e+08	3.80286e+08	3.93698e+08	3.97518e+08	4.23257e+08	3.84832e+08	4.33981e+08	4.49136e+08	4.20258e+08	4.31486e+08	4.82683e+08
Q9JMH9	Unconventional myosin-XVIIIa [OS=Mus musculus]	Myo18a	1.47674e+08	153455758	1.83826e+08	203315519	2.4214e+08	1.40155e+08	2.06051e+08	1.86206e+08	1.17755e+08	1.75888e+08	1.53817e+08	1.48618e+08
Q61301	Catenin alpha-2 [OS=Mus musculus]	Ctnna2	6.00931e+07	5.50911e+07	5.56506e+07	5.39513e+07	4.62394e+07	4.96626e+07	5.22635e+07	5.1027e+07	6.67865e+07	6.2137e+07	6.51777e+07	6.32625e+07
Q04447	Creatine kinase B-type [OS=Mus musculus]	Ckb	7.61619e+08	7.28396e+08	7.68862e+08	8.50554e+08	7.47935e+08	748902477	7.18037e+08	7.66555e+08	6.87775e+08	7.12572e+08	6.64833e+08	6.92333e+08
P11499	Heat shock protein HSP 90-beta [OS=Mus musculus]	Hsp90ab1	1.70199e+08	1.74302e+08	184555916	1.56296e+08	1.64691e+08	1.68382e+08	1.88199e+08	1.58818e+08	1.87949e+08	1.74909e+08	1.82676e+08	1.67946e+08
P17710	Hexokinase-1 [OS=Mus musculus]	Hk1	2.24366e+08	250812138	2.27814e+08	2.50714e+08	2.17697e+08	184096637	224998020	2.3489e+08	2.18588e+08	2.17791e+08	2.66295e+08	2.40849e+08
P63038	60 kDa heat shock protein, mitochondrial [OS=Mus musculus]	Hspd1	152207304	1.73415e+08	1.59629e+08	1.71556e+08	1.5325e+08	1.31672e+08	1.58793e+08	1.4928e+08	1.49102e+08	1.55598e+08	192926906	1.60026e+08
P46096	Synaptotagmin-1 [OS=Mus musculus]	Syt1	7.54482e+08	7.29886e+08	7.76573e+08	7.40805e+08	6.74833e+08	7.24637e+08	6.72342e+08	7.34116e+08	730377438	663064007	6.89386e+08	7.37359e+08
Q91ZX7	Prolow-density lipoprotein receptor-related protein 1 [OS=Mus musculus]	Lrp1	2.37825e+07	2.47829e+07	2.3821e+07	2.20135e+07	28632148	3.09995e+07	3.33794e+07	3.07128e+07	3.05349e+07	2.7449e+07	3.06979e+07	2.8368e+07
Q8CI94	Glycogen phosphorylase, brain form [OS=Mus musculus]	Pygb	7.40796e+07	9.29811e+07	8.84844e+07	7.9618e+07	7.71012e+07	9.56361e+07	8.33998e+07	9.45578e+07	1.24651e+08	1.08435e+08	1.15741e+08	1.05488e+08
P68368	Tubulin alpha-4A chain [OS=Mus musculus]	Tuba4a	3.76138e+08	4.34575e+08	4.2808e+08	4.64234e+08	4.47111e+08	4.31636e+08	4.27696e+08	4.69645e+08	3.96174e+08	396249582	3.57994e+08	4.11682e+08
Q80UG2	Plexin-A4 [OS=Mus musculus]	Plxna4	3.5144e+07	3.21026e+07	3.07795e+07	3.2825e+07	3.15807e+07	3.61822e+07	3.13181e+07	3.28424e+07	3.72926e+07	3.57257e+07	3.17642e+07	3.47148e+07
P97427	Dihydropyrimidinase-related protein 1 [OS=Mus musculus]	Crmp1	1.53879e+08	1.5357e+08	1.51918e+08	1.43615e+08	1.37294e+08	1.40871e+08	1.28566e+08	1.47046e+08	168688765	173403146	1.70108e+08	1.78778e+08
Q9ES97	Reticulon-3 [OS=Mus musculus]	Rtn3	1.27427e+08	1.2483e+08	1.24396e+08	1.25548e+08	1.26396e+08	1.22119e+08	1.24999e+08	1.16267e+08	1.36208e+08	1.29548e+08	133386217	1.25563e+08
P50396	Rab GDP dissociation inhibitor alpha [OS=Mus musculus]	Gdi1	1.23794e+08	1.21939e+08	1.08557e+08	1.16123e+08	1.2629e+08	1.46929e+08	1.17738e+08	1.19388e+08	1.41975e+08	1.50368e+08	1.2596e+08	1.22546e+08
Q8BH59	Calcium-binding mitochondrial carrier protein Aralar1 [OS=Mus musculus]	Slc25a12	7.17274e+07	8.02716e+07	7.7508e+07	8.27048e+07	6.90209e+07	4.82984e+07	7.09126e+07	7.6086e+07	6.49762e+07	6.43819e+07	7.81733e+07	8.02273e+07
Q8K596	Sodium/calcium exchanger 2 [OS=Mus musculus]	Slc8a2	1.03159e+08	8.98268e+07	9.40692e+07	9.01979e+07	8.5544e+07	8.58819e+07	7.92355e+07	9.16505e+07	1.00762e+08	9.21765e+07	9.3358e+07	1.00935e+08
Q64332	Synapsin-2 [OS=Mus musculus]	Syn2	2.80724e+08	2.90659e+08	2.85137e+08	2.32543e+08	2.31696e+08	2.54009e+08	2.31987e+08	2.84363e+08	360743308	3.69928e+08	380256033	4.24623e+08
P58252	Elongation factor 2 [OS=Mus musculus]	Eef2	7.16748e+07	6.98405e+07	7.42328e+07	7.39383e+07	8.67895e+07	8.66316e+07	9.52249e+07	9.05469e+07	7.38195e+07	7.28923e+07	7.1469e+07	7.81104e+07
Q02248	Catenin beta-1 [OS=Mus musculus]	Ctnnb1	5.07038e+07	4.94585e+07	4.62995e+07	4.52424e+07	4.36639e+07	4.63085e+07	4.39417e+07	5.1383e+07	5.65313e+07	5.97526e+07	5.43275e+07	5.92761e+07
Q7TMB8	Cytoplasmic FMR1-interacting protein 1 [OS=Mus musculus]	Cyfip1	1.08712e+07	1.15231e+07	1.09862e+07	1.04962e+07	1.11076e+07	1.34862e+07	1.19527e+07	1.15622e+07	1.37308e+07	1.27567e+07	1.2913e+07	1.22996e+07
P47857	ATP-dependent 6-phosphofructokinase, muscle type [OS=Mus musculus]	Pfkm	1.22602e+08	1.25633e+08	1.01497e+08	9.81981e+07	1.01516e+08	100914225	1.10097e+08	1.12147e+08	1.05965e+08	9.70965e+07	1.00424e+08	1.25861e+08
Q64487	Receptor-type tyrosine-protein phosphatase delta [OS=Mus musculus]	Ptprd	2.61177e+07	2.61106e+07	2.50629e+07	2.82801e+07	2.42671e+07	2.47273e+07	2.35026e+07	2.36155e+07	2.6277e+07	2.62477e+07	2.71968e+07	2.84669e+07
P09411	Phosphoglycerate kinase 1 [OS=Mus musculus]	Pgk1	2.11193e+08	2.12787e+08	2.26458e+08	2.23772e+08	2.32678e+08	2.37549e+08	260544010	2.36039e+08	2.43373e+08	2.16838e+08	2.27295e+08	2.06129e+08
Q921I1	Serotransferrin [OS=Mus musculus]	Tf	9.47469e+07	8.49308e+07	7.26175e+07	9.48378e+07	1.1908e+08	8.87057e+07	1.19649e+08	8.87689e+07	1.70145e+07	1.94905e+07	1.63429e+07	1.61058e+07
B1AWN6	Sodium channel protein type 2 subunit alpha [OS=Mus musculus]	Scn2a	6.5193e+07	5.62344e+07	6.20852e+07	5.29914e+07	4.91151e+07	5.23517e+07	4.70331e+07	5.28832e+07	6.58915e+07	5.71577e+07	5.64834e+07	6.0785e+07
P61264	Syntaxin-1B [OS=Mus musculus]	Stx1b	5.31512e+08	4.75478e+08	5.0006e+08	482395219	4.50381e+08	5.36107e+08	4.57096e+08	4.63296e+08	4.85934e+08	451630424	4.32635e+08	4.64989e+08
Q61316	Heat shock 70 kDa protein 4 [OS=Mus musculus]	Hspa4	6.01957e+07	5.8265e+07	5.59438e+07	5.74201e+07	6.40361e+07	5.83335e+07	6.22056e+07	5.43339e+07	6.09856e+07	64007731	5.8114e+07	5.80048e+07
P11798	Calcium/calmodulin-dependent protein kinase type II subunit alpha [OS=Mus musculus]	Camk2a	1067586641	1041116438	9.65855e+08	9.55857e+08	9.07231e+08	8.99993e+08	8.81377e+08	1126737780	1003236256	9.52934e+08	1111790024	1095251492
Q9EQH3	Vacuolar protein sorting-associated protein 35 [OS=Mus musculus]	Vps35	82570156	8.09113e+07	7.6901e+07	8.01307e+07	7.93384e+07	8.25867e+07	8.43576e+07	85639734	9.09911e+07	8.41188e+07	9.27674e+07	8.27943e+07
P63318	Protein kinase C gamma type [OS=Mus musculus]	Prkcg	8.14552e+07	9.62013e+07	8.74258e+07	6.70828e+07	6.64242e+07	8.34931e+07	6.66139e+07	7.60729e+07	1.31881e+08	1.31565e+08	128137386	1.18017e+08
P18872	Guanine nucleotide-binding protein G(o) subunit alpha [OS=Mus musculus]	Gnao1	1087751867	1010160389	1077910625	1007114828	9.73757e+08	1158979024	9.95468e+08	1022804335	1194687781	1129306270	1024454110	1092289800
Q9WUA3	ATP-dependent 6-phosphofructokinase, platelet type [OS=Mus musculus]	Pfkp	6.10823e+07	5.92889e+07	5.92756e+07	6.38466e+07	6.3867e+07	6.57367e+07	6.97742e+07	6.85758e+07	6.96995e+07	6.46952e+07	6.56064e+07	6.5348e+07
P48722	Heat shock 70 kDa protein 4L [OS=Mus musculus]	Hspa4l	4.44546e+07	4.25196e+07	4.379e+07	4.30861e+07	4.54212e+07	4.38228e+07	4.59547e+07	3.92978e+07	4.30339e+07	4.50605e+07	4.05216e+07	3.58482e+07
P17183	Gamma-enolase [OS=Mus musculus]	Eno2	271061581	2.87891e+08	2.83918e+08	2.94173e+08	2.97151e+08	2.98862e+08	2.74955e+08	3.04937e+08	3.13434e+08	282487990	3.07468e+08	2.89443e+08
B0V2N1	Receptor-type tyrosine-protein phosphatase S [OS=Mus musculus]	Ptprs	3.27137e+07	3.46709e+07	3.19712e+07	3.12812e+07	2.94223e+07	2.85721e+07	2.80072e+07	2.90125e+07	3.32374e+07	3.44812e+07	3.32907e+07	3.31997e+07
Q6ZPE2	Myotubularin-related protein 5 [OS=Mus musculus]	Sbf1	7.86693e+07	6.49365e+07	9.42833e+07	7.83125e+07	6.28466e+07	6.1169e+07	5.62786e+07	6.42276e+07	9.04169e+07	8.24787e+07	6.9427e+07	7.25893e+07
Q9Z0E0	Neurochondrin [OS=Mus musculus]	Ncdn	6.85523e+07	7.62853e+07	6.63472e+07	6.30773e+07	6.41696e+07	7.47455e+07	6.89242e+07	7.18905e+07	8.71768e+07	8.27867e+07	7.90456e+07	7.08838e+07
Q9Z2H5	Band 4.1-like protein 1 [OS=Mus musculus]	Epb41l1	5.95884e+07	5.91272e+07	6.04152e+07	5.99202e+07	5.81051e+07	6.79047e+07	5.92818e+07	5.10708e+07	7.55509e+07	8.42409e+07	8.0085e+07	7.47602e+07
Q9JME5	AP-3 complex subunit beta-2 [OS=Mus musculus]	Ap3b2	3.06049e+07	3.41198e+07	3.06427e+07	3.30925e+07	3.22933e+07	3.01279e+07	3.49977e+07	3.44204e+07	3.01691e+07	3.36799e+07	3.14614e+07	3.44415e+07
Q922S4	cGMP-dependent 3',5'-cyclic phosphodiesterase [OS=Mus musculus]	Pde2a	4.01834e+07	4.10497e+07	3.74117e+07	3.95433e+07	3.81212e+07	4.07198e+07	3.68083e+07	4.16341e+07	5.16856e+07	5.73726e+07	5.06646e+07	5.30673e+07
Q76MZ3	Serine/threonine-protein phosphatase 2A 65 kDa regulatory subunit A alpha isoform [OS=Mus musculus]	Ppp2r1a	1.15751e+08	1.20481e+08	1.145e+08	1.2335e+08	1.25579e+08	1.45267e+08	140401077	1.18281e+08	1.24557e+08	1.24801e+08	1.4334e+08	1.25145e+08
Q9Z1G4	V-type proton ATPase 116 kDa subunit a 1 [OS=Mus musculus]	Atp6v0a1	2.6489e+08	2.70162e+08	2.66929e+08	2.67034e+08	2.55253e+08	2.54025e+08	2.46315e+08	2.81054e+08	2.72384e+08	253469451	2.66041e+08	2.64619e+08
E9Q912	Rap1 GTPase-GDP dissociation stimulator 1 [OS=Mus musculus]	Rap1gds1	7.45419e+07	7.36113e+07	7.45306e+07	7.41233e+07	7.62064e+07	7.37897e+07	7.75494e+07	7.42934e+07	7.19331e+07	6.87365e+07	6.75349e+07	66098592
Q91V14	Solute carrier family 12 member 5 [OS=Mus musculus]	Slc12a5	1.58144e+08	1.43039e+08	161354355	1.64311e+08	1.51344e+08	1.46294e+08	1.52827e+08	1.64018e+08	1.45576e+08	1.31164e+08	1.34571e+08	144957543
Q6Q477	Plasma membrane calcium-transporting ATPase 4 [OS=Mus musculus]	Atp2b4	6.38162e+07	6.02799e+07	6.54771e+07	6.53829e+07	6.1341e+07	7.15277e+07	6.39689e+07	6.80965e+07	9.36353e+07	9.5384e+07	9.1056e+07	9.65985e+07
Q91V92	ATP-citrate synthase [OS=Mus musculus]	Acly	3.71114e+07	3.01353e+07	34069863	8.99434e+07	3.61343e+07	3.58904e+07	3.62468e+07	3.75209e+07	3.2831e+07	3.33994e+07	3.15841e+07	3.51576e+07
P28738	Kinesin heavy chain isoform 5C [OS=Mus musculus]	Kif5c	3.64632e+07	3.63896e+07	3.70782e+07	3.66402e+07	3.70908e+07	3.65617e+07	3.5621e+07	3.63766e+07	3.76952e+07	3.90087e+07	3.82104e+07	3.53696e+07
O35927	Catenin delta-2 [OS=Mus musculus]	Ctnnd2	2.858e+07	2.46926e+07	2.81497e+07	2.53611e+07	2.55914e+07	2.63836e+07	2.50825e+07	2.30036e+07	3.28808e+07	3.33508e+07	3.14597e+07	3.19248e+07
P58281	Dynamin-like 120 kDa protein, mitochondrial [OS=Mus musculus]	Opa1	4.93192e+07	5.32242e+07	62744570	5.24327e+07	4.71832e+07	3.91985e+07	4.85404e+07	5.04136e+07	5.16958e+07	4.48311e+07	6.00032e+07	4.9696e+07
Q9CS84	Neurexin-1 [OS=Mus musculus]	Nrxn1	4.61937e+07	4.32835e+07	4.4245e+07	4.35121e+07	5.03326e+07	4.49631e+07	4.47832e+07	4.38581e+07	4.59249e+07	4.66064e+07	4.09721e+07	4.43943e+07
Q6NXK7	Inactive dipeptidyl peptidase 10 [OS=Mus musculus]	Dpp10	7.85442e+07	6.72333e+07	6.98993e+07	7.59215e+07	7.14914e+07	7.66359e+07	7.00484e+07	8.12676e+07	7.69537e+07	8.34614e+07	7.31396e+07	8.2673e+07
Q9Z218	Dipeptidyl aminopeptidase-like protein 6 [OS=Mus musculus]	Dpp6	1.1294e+08	109032671	1.08485e+08	9.18166e+07	1.02376e+08	9.75007e+07	9.1939e+07	1.00484e+08	1.11677e+08	1.17534e+08	1.02938e+08	1.15107e+08
Q03265	ATP synthase subunit alpha, mitochondrial [OS=Mus musculus]	Atp5f1a	4.43085e+08	4.84164e+08	4.54836e+08	4.84584e+08	4.38254e+08	3.12541e+08	4.60588e+08	4.43867e+08	3.80501e+08	3.90845e+08	4.98443e+08	4.71851e+08
Q8BVE3	V-type proton ATPase subunit H [OS=Mus musculus]	Atp6v1h	2.24213e+08	2.50565e+08	2.34665e+08	2.74367e+08	2.61344e+08	2.50262e+08	2.6742e+08	2.43779e+08	2.50638e+08	236477810	2.56334e+08	2.44596e+08
Q61699	Heat shock protein 105 kDa [OS=Mus musculus]	Hsph1	4.60045e+07	4.33133e+07	4.13278e+07	4.58043e+07	4.65951e+07	4.33866e+07	4.6284e+07	3.84879e+07	4.3647e+07	4.40705e+07	4.23946e+07	3.80178e+07
Q60597	2-oxoglutarate dehydrogenase complex component E1 [OS=Mus musculus]	Ogdh	4.4523e+07	5.17557e+07	4.83453e+07	5.55318e+07	5.12744e+07	3.31596e+07	5.30875e+07	4.7369e+07	3.24883e+07	3.40178e+07	4.45177e+07	4.48627e+07
Q8BYI9	Tenascin-R [OS=Mus musculus]	Tnr	9.25243e+07	8.79649e+07	8.4823e+07	8.84962e+07	100943285	9.77523e+07	9.41993e+07	8.92327e+07	7.3358e+07	9.31905e+07	8.05935e+07	8.68019e+07
P23819	Glutamate receptor 2 [OS=Mus musculus]	Gria2	7.1751e+07	7.3403e+07	6.71666e+07	6.73738e+07	6.12652e+07	7.06557e+07	6.28292e+07	6.38197e+07	6.58134e+07	6.40909e+07	7.04799e+07	6.82924e+07
Q8BZ98	Dynamin-3 [OS=Mus musculus]	Dnm3	3.36133e+07	3.36701e+07	3.49637e+07	3.6833e+07	3.60271e+07	3.65989e+07	3.64263e+07	3.97325e+07	3.4577e+07	3.5432e+07	3.64961e+07	3.75498e+07
Q11011	Puromycin-sensitive aminopeptidase [OS=Mus musculus]	Npepps	8.0935e+07	8.29605e+07	8.23289e+07	7.67648e+07	8.10409e+07	8.82344e+07	7.83782e+07	8.15421e+07	9.64668e+07	9.01427e+07	9.68545e+07	9.41423e+07
Q61598	Rab GDP dissociation inhibitor beta [OS=Mus musculus]	Gdi2	9.46811e+07	1.02627e+08	9.04483e+07	9.62203e+07	1.04494e+08	1.05872e+08	9.79067e+07	1.22861e+08	1.14418e+08	1.16956e+08	1.08359e+08	1.35887e+08
O35526	Syntaxin-1A [OS=Mus musculus]	Stx1a	314589005	2.56815e+08	2.84694e+08	2.99607e+08	2.22282e+08	3.18747e+08	2.34704e+08	2.70635e+08	232249512	275682366	2.14094e+08	234591597
P14824	Annexin A6 [OS=Mus musculus]	Anxa6	8.67846e+07	8.63094e+07	8.30572e+07	8.60889e+07	9.93037e+07	1.05023e+08	9.79061e+07	9.74843e+07	8.41939e+07	8.34142e+07	9.32162e+07	9.22749e+07
O88343	Electrogenic sodium bicarbonate cotransporter 1 [OS=Mus musculus]	Slc4a4	5.49697e+07	5.70468e+07	5.59178e+07	5.35605e+07	5.34366e+07	6.3203e+07	5.05531e+07	5.5371e+07	6.99259e+07	6.24368e+07	5.98355e+07	6.36762e+07
Q9QXY6	EH domain-containing protein 3 [OS=Mus musculus]	Ehd3	3.99327e+07	4.40127e+07	4.39864e+07	4.30383e+07	4.48093e+07	4.68564e+07	4.61855e+07	4.86794e+07	4.41049e+07	4.74471e+07	4.61373e+07	5.04168e+07
Q62108	Disks large homolog 4 [OS=Mus musculus]	Dlg4	1.15532e+08	1.1329e+08	1.16672e+08	1.15033e+08	9.34905e+07	9.7895e+07	1.07113e+08	1.03894e+08	1.20075e+08	1.17603e+08	1.2839e+08	1.19614e+08
P70398	Probable ubiquitin carboxyl-terminal hydrolase FAF-X [OS=Mus musculus]	Usp9x	2.43436e+07	1.78385e+07	2.48401e+07	1.43707e+07	2.63247e+07	1.62531e+07	2.62021e+07	1.5882e+07	2.62923e+07	1.50148e+07	2.72455e+07	13837653
O70318	Band 4.1-like protein 2 [OS=Mus musculus]	Epb41l2	1.50896e+08	1.49026e+08	1.85629e+08	1.48633e+08	1.3913e+08	1.87995e+08	1.69621e+08	1.52604e+08	1.82699e+08	167223813	1.57443e+08	1.61231e+08
P11881	Inositol 1,4,5-trisphosphate receptor type 1 [OS=Mus musculus]	Itpr1	1.63391e+07	1.41332e+07	1.68398e+07	1.84792e+07	1.55081e+07	1.46291e+07	1.78123e+07	1.92132e+07	1.5219e+07	1.28585e+07	1.4492e+07	1.4741e+07
P56399	Ubiquitin carboxyl-terminal hydrolase 5 [OS=Mus musculus]	Usp5	4.90651e+07	4.89814e+07	5.1513e+07	4.96801e+07	4.91996e+07	5.07833e+07	4.94191e+07	5.38907e+07	5.4126e+07	5.35432e+07	4.95394e+07	4.97969e+07
P16858	Glyceraldehyde-3-phosphate dehydrogenase [OS=Mus musculus]	Gapdh	6.67076e+08	7.59675e+08	8.22075e+08	839276027	8.72232e+08	7.70532e+08	8.01003e+08	1023738282	8.87271e+08	9.44232e+08	848334652	9.84154e+08
Q61548	Clathrin coat assembly protein AP180 [OS=Mus musculus]	Snap91	1.25108e+08	132241206	1.31069e+08	1.5316e+08	1.20878e+08	1.25621e+08	1.18916e+08	1.50366e+08	1.41261e+08	1.59366e+08	1.47554e+08	1.78743e+08
P08553	Neurofilament medium polypeptide [OS=Mus musculus]	Nefm	1.17285e+08	8.15767e+07	9.7787e+07	8.42439e+07	8.65093e+07	5.15208e+07	8.03635e+07	6.63418e+07	6.02929e+07	5.08444e+07	8.17853e+07	6.89573e+07
Q3UNH4	G protein-regulated inducer of neurite outgrowth 1 [OS=Mus musculus]	Gprin1	5.33733e+07	4.97525e+07	5.27128e+07	4.19306e+07	45862537	5.6666e+07	4.92968e+07	4.3991e+07	7.71617e+07	7.13246e+07	6.72088e+07	6.38891e+07
P28663	Beta-soluble NSF attachment protein [OS=Mus musculus]	Napb	1.41849e+08	1.34024e+08	1.36408e+08	1.31642e+08	128829861	1.38353e+08	1.22511e+08	131903663	1.4669e+08	1.53756e+08	1.40908e+08	1.49992e+08
P84091	AP-2 complex subunit mu [OS=Mus musculus]	Ap2m1	1.92545e+08	179805805	2.02058e+08	187456313	1.89667e+08	1.79528e+08	1.90843e+08	1.8476e+08	180403516	1.75137e+08	1.75182e+08	1.78352e+08
P17182	Alpha-enolase [OS=Mus musculus]	Eno1	6.81037e+08	6.85333e+08	7.44508e+08	6.48909e+08	7.03162e+08	7.21083e+08	7.01416e+08	7.40489e+08	7.98732e+08	7.36184e+08	8.14142e+08	7.20053e+08
O54774	AP-3 complex subunit delta-1 [OS=Mus musculus]	Ap3d1	4.84558e+07	4.56794e+07	4.38179e+07	4.75007e+07	4.6019e+07	4.45811e+07	4.66991e+07	5.13518e+07	4.90532e+07	4.88934e+07	4.05802e+07	5.07527e+07
P28652	Calcium/calmodulin-dependent protein kinase type II subunit beta [OS=Mus musculus]	Camk2b	1.27898e+08	1.32085e+08	1.18662e+08	1.1515e+08	1.02709e+08	1.03126e+08	1.07712e+08	1.13298e+08	1.27187e+08	1.25995e+08	1.48588e+08	1.4561e+08
Q64521	Glycerol-3-phosphate dehydrogenase, mitochondrial [OS=Mus musculus]	Gpd2	4.9044e+07	6.29296e+07	5.49672e+07	5.43414e+07	5.10943e+07	4.10261e+07	5.16572e+07	5.25227e+07	4.78651e+07	5.40252e+07	6.21305e+07	6.24403e+07
O35098	Dihydropyrimidinase-related protein 4 [OS=Mus musculus]	Dpysl4	6.49692e+07	7.12772e+07	6.25446e+07	6.26091e+07	6.30704e+07	7.05627e+07	6.32072e+07	6.34502e+07	8.35367e+07	8.02083e+07	7.64765e+07	7.58091e+07
Q80U28	MAP kinase-activating death domain protein [OS=Mus musculus]	Madd	1.93778e+07	1.86592e+07	1.80647e+07	1.93181e+07	1.7017e+07	1.85747e+07	2.02629e+07	1.91111e+07	1.90558e+07	1.86239e+07	1.93789e+07	1.76719e+07
D3YZU1	SH3 and multiple ankyrin repeat domains protein 1 [OS=Mus musculus]	Shank1	2.39908e+07	2.01501e+07	2.1291e+07	2.07133e+07	1.58839e+07	1.548e+07	2.22547e+07	1.7915e+07	2.21113e+07	2.0331e+07	2.34062e+07	2.29049e+07
Q91XM9	Disks large homolog 2 [OS=Mus musculus]	Dlg2	5.01999e+07	4.48923e+07	4.64634e+07	4.80774e+07	3.91082e+07	3.66593e+07	4.38574e+07	4.99617e+07	4.92511e+07	4.7891e+07	5.61306e+07	5.99744e+07
Q8C419	Probable G-protein coupled receptor 158 [OS=Mus musculus]	Gpr158	5.54441e+07	5.11819e+07	5.15175e+07	5.45499e+07	4.88368e+07	5.77096e+07	4.96391e+07	4.8426e+07	5.42026e+07	5.16457e+07	4.77173e+07	4.98848e+07
Q91VD9	NADH-ubiquinone oxidoreductase 75 kDa subunit, mitochondrial [OS=Mus musculus]	Ndufs1	8.24787e+07	7.96597e+07	7.82916e+07	8.56731e+07	8.19477e+07	6.32848e+07	8.11954e+07	7.45195e+07	6.62519e+07	7.25699e+07	8.61536e+07	8.39765e+07
P06745	Glucose-6-phosphate isomerase [OS=Mus musculus]	Gpi	1.26994e+08	1.28508e+08	1.15958e+08	1.25415e+08	1.29982e+08	1.31079e+08	1.22693e+08	1.52964e+08	1.46147e+08	1.46375e+08	1.4767e+08	167804299
P16125	L-lactate dehydrogenase B chain [OS=Mus musculus]	Ldhb	1.89106e+08	2.0002e+08	1.95996e+08	2.173e+08	2.00118e+08	2.27826e+08	2.10792e+08	2.17014e+08	1.93367e+08	1.92129e+08	1.93269e+08	1.80772e+08
P05064	Fructose-bisphosphate aldolase A [OS=Mus musculus]	Aldoa	6.54155e+08	6.88704e+08	6.64401e+08	6.6184e+08	6.61585e+08	7.0954e+08	7.21413e+08	7.0853e+08	8.48809e+08	7.80441e+08	8.07172e+08	824020323
O08532	Voltage-dependent calcium channel subunit alpha-2/delta-1 [OS=Mus musculus]	Cacna2d1	7.87098e+07	7.48592e+07	7.19572e+07	7.49985e+07	6.81095e+07	7.83271e+07	7.06058e+07	7.23713e+07	8.42643e+07	8.75124e+07	8.00101e+07	8.35571e+07
Q62188	Dihydropyrimidinase-related protein 3 [OS=Mus musculus]	Dpysl3	6.1613e+07	6.92496e+07	5.20193e+07	5.64396e+07	5.76866e+07	6.19639e+07	5.29144e+07	5.55584e+07	7.73723e+07	7.69099e+07	6.51953e+07	6.73792e+07
P70206	Plexin-A1 [OS=Mus musculus]	Plxna1	6.6046e+07	5.95318e+07	5.97703e+07	6.27719e+07	5.69946e+07	6.18653e+07	5.61609e+07	5.07132e+07	4.68788e+07	5.48843e+07	4.92552e+07	4.89667e+07
P68404	Protein kinase C beta type [OS=Mus musculus]	Prkcb	8.13417e+07	7.91913e+07	7.5818e+07	7.67228e+07	7.55172e+07	7.84551e+07	8.46366e+07	7.94401e+07	7.3631e+07	7.4466e+07	6.60109e+07	6.79823e+07
Q9EPN1	Neurobeachin [OS=Mus musculus]	Nbea	1.36515e+07	1.09372e+07	1.15719e+07	1.15905e+07	1.29017e+07	1.05161e+07	1.45583e+07	1.44159e+07	1.35853e+07	1.23862e+07	1.56995e+07	1.59129e+07
Q6P9K9	Neurexin-3 [OS=Mus musculus]	Nrxn3	7.52516e+07	6.03124e+07	5.74396e+07	5.61599e+07	6.36071e+07	8.19193e+07	7.01825e+07	6.32499e+07	5.90852e+07	6.44622e+07	5.23262e+07	5.78213e+07
Q8BRT1	CLIP-associating protein 2 [OS=Mus musculus]	Clasp2	1.61607e+07	1.70541e+07	1.52595e+07	1.41524e+07	1.4045e+07	1.45462e+07	1.54753e+07	1.60267e+07	1.80603e+07	1.72771e+07	1.72554e+07	1.88903e+07
P08113	Endoplasmin [OS=Mus musculus]	Hsp90b1	2.6325e+07	3.14737e+07	3.10087e+07	3.2223e+07	4.15967e+07	4.20054e+07	5.07689e+07	4.14425e+07	3.2399e+07	2.31912e+07	3.95215e+07	2.45088e+07
Q4KMM3	Oxidation resistance protein 1 [OS=Mus musculus]	Oxr1	7.59853e+07	8.50371e+07	7.8773e+07	8.14505e+07	7.85584e+07	7.60084e+07	7.91178e+07	7.739e+07	7.88713e+07	7.63683e+07	8.04114e+07	7.79416e+07
P63328	Protein phosphatase 3 catalytic subunit alpha [OS=Mus musculus]	Ppp3ca	2.65716e+08	2.50415e+08	2.50481e+08	2.27974e+08	2.36582e+08	2.59437e+08	2.38836e+08	2.33578e+08	2.3411e+08	221401623	2.3672e+08	2.3e+08
O55131	Septin-7 [OS=Mus musculus]	Septin7	2.05242e+08	1.8094e+08	2.01281e+08	2.12042e+08	1.95294e+08	1.80385e+08	181937509	2.25241e+08	1.95496e+08	2.00175e+08	1.96393e+08	2.16478e+08
P70336	Rho-associated protein kinase 2 [OS=Mus musculus]	Rock2	3.82705e+07	4.38162e+07	4.15129e+07	4.20567e+07	4.13092e+07	4.43997e+07	4.30694e+07	3.92079e+07	4.50416e+07	3.97747e+07	4.28135e+07	3.78682e+07
D3Z7P3	Glutaminase kidney isoform, mitochondrial [OS=Mus musculus]	Gls	3.40102e+07	3.27715e+07	3.18329e+07	3.76958e+07	3.06354e+07	2.05954e+07	3.24394e+07	3.19436e+07	2.9068e+07	2.88091e+07	3.69728e+07	3.38359e+07
Q8VD37	SH3-containing GRB2-like protein 3-interacting protein 1 [OS=Mus musculus]	Sgip1	2.82236e+07	3.08294e+07	2.99569e+07	3.04046e+07	3.33177e+07	3.04267e+07	3.40336e+07	2.72288e+07	3.7279e+07	3.42202e+07	3.19631e+07	3.65249e+07
Q9WUB3	Glycogen phosphorylase, muscle form [OS=Mus musculus]	Pygm	1.21858e+07	1.34854e+07	1.35749e+07	1.28399e+07	1.43521e+07	1.51984e+07	1.49528e+07	1.39117e+07	1.49859e+07	1.46227e+07	1.44511e+07	1.29363e+07
Q80Z38	SH3 and multiple ankyrin repeat domains protein 2 [OS=Mus musculus]	Shank2	1.88139e+07	2.0012e+07	2.01215e+07	20316324	1.458e+07	1.76823e+07	1.79739e+07	1.53834e+07	2.25044e+07	1.9002e+07	2.57763e+07	2.43592e+07
Q5DTL9	Sodium-driven chloride bicarbonate exchanger [OS=Mus musculus]	Slc4a10	5.03378e+07	4.72614e+07	4.86566e+07	5.04772e+07	4.67024e+07	4.63348e+07	4.91449e+07	4.68292e+07	4.40791e+07	4.13902e+07	4.10357e+07	4.39871e+07
P62259	14-3-3 protein epsilon [OS=Mus musculus]	Ywhae	5.40573e+08	5.11537e+08	4.82955e+08	5.01649e+08	497443073	5.47795e+08	5.49885e+08	5.28802e+08	5.01669e+08	5.48437e+08	5.23756e+08	5.03615e+08
Q91WC3	Long-chain-fatty-acid--CoA ligase 6 [OS=Mus musculus]	Acsl6	5.84986e+07	4.93047e+07	5.75682e+07	5.13712e+07	5.73763e+07	4.76997e+07	6.08593e+07	4.69451e+07	5.28396e+07	4.25118e+07	5.40238e+07	3.94109e+07
P63085	Mitogen-activated protein kinase 1 [OS=Mus musculus]	Mapk1	6.07403e+07	6.48573e+07	6.30932e+07	5.62777e+07	6.27998e+07	6.0627e+07	6.10798e+07	6.01523e+07	7.84398e+07	8.75042e+07	92372545	8.20642e+07
P40142	Transketolase [OS=Mus musculus]	Tkt	4.35183e+07	4.06115e+07	4.44961e+07	3.99273e+07	4.73062e+07	4.86054e+07	4.73898e+07	4.51243e+07	5.38793e+07	4.45923e+07	5.52028e+07	4.52411e+07
Q4ACU6	SH3 and multiple ankyrin repeat domains protein 3 [OS=Mus musculus]	Shank3	2.92652e+07	2.77217e+07	2.7895e+07	2.68826e+07	2.49975e+07	2.56971e+07	2.69371e+07	2.96086e+07	2.72541e+07	2.67239e+07	2.98841e+07	3.10186e+07
P11983	T-complex protein 1 subunit alpha [OS=Mus musculus]	Tcp1	2.54742e+07	2.76723e+07	2.81688e+07	2.49568e+07	2.99505e+07	2.72858e+07	3.08906e+07	2.85477e+07	2.81058e+07	2.84988e+07	2.82984e+07	2.7337e+07
P70704	Phospholipid-transporting ATPase IA [OS=Mus musculus]	Atp8a1	5.42955e+07	5.54735e+07	5.02857e+07	4.64203e+07	5.16811e+07	5.93359e+07	5.26861e+07	5.61968e+07	5.71763e+07	6.07653e+07	6.02214e+07	5.78825e+07
Q8K0T0	Reticulon-1 [OS=Mus musculus]	Rtn1	1.06237e+08	1.00191e+08	1.28592e+08	9.8433e+07	9.52672e+07	1.05233e+08	9.55289e+07	1.03402e+08	1.37741e+08	1.18009e+08	1.41439e+08	1.16206e+08
P56564	Excitatory amino acid transporter 1 [OS=Mus musculus]	Slc1a3	2.17055e+08	195565169	2.01674e+08	1.88016e+08	1.92666e+08	1.85176e+08	2.06304e+08	1.87122e+08	2.658e+08	262765251	2.40207e+08	236391572
P80314	T-complex protein 1 subunit beta [OS=Mus musculus]	Cct2	3.20037e+07	3.35712e+07	3.23364e+07	3.14894e+07	3.52128e+07	3.3224e+07	3.54702e+07	3.32214e+07	3.60046e+07	3.34246e+07	3.45517e+07	3.35569e+07
Q8K0U4	Heat shock 70 kDa protein 12A [OS=Mus musculus]	Hspa12a	7.74668e+07	7.81929e+07	7.65454e+07	7.88968e+07	7.59905e+07	7.26069e+07	7.30049e+07	7.59416e+07	7.47896e+07	7.90407e+07	7.2841e+07	7.31617e+07
Q9QXL2	Kinesin-like protein KIF21A [OS=Mus musculus]	Kif21a	1.40827e+07	1.40013e+07	1.42516e+07	1.64605e+07	1.60432e+07	1.42479e+07	1.55934e+07	1.61942e+07	1.63293e+07	1.59555e+07	1.49261e+07	1.62619e+07
P10126	Elongation factor 1-alpha 1 [OS=Mus musculus]	Eef1a1	1.71965e+08	1.87275e+08	1.85315e+08	1.76614e+08	2.17243e+08	210135272	240749137	2.31237e+08	1.74558e+08	1.89631e+08	2.02686e+08	1.92839e+08
P47708	Rabphilin-3A [OS=Mus musculus]	Rph3a	6.24638e+07	5.77374e+07	5.70777e+07	5.70325e+07	4.84533e+07	5.00619e+07	4.71197e+07	4.4672e+07	4.56439e+07	4.41134e+07	5.13575e+07	5.00805e+07
Q9Z268	RasGAP-activating-like protein 1 [OS=Mus musculus]	Rasal1	4.75187e+07	5.35495e+07	5.07879e+07	4.63604e+07	4.62554e+07	6.20292e+07	4.8325e+07	4.25813e+07	5.26506e+07	6.02877e+07	5.37782e+07	4.53048e+07
O88342	WD repeat-containing protein 1 [OS=Mus musculus]	Wdr1	1.19902e+08	1.51529e+08	1.2792e+08	1.19074e+08	135999597	1.86205e+08	1.53933e+08	1.4614e+08	143529222	1.30287e+08	132946331	136833475
Q9QYB8	Beta-adducin [OS=Mus musculus]	Add2	5.86759e+07	8.78777e+07	5.25092e+07	5.30177e+07	4.90041e+07	8.74801e+07	5.28973e+07	7.84667e+07	8.15234e+07	8.98019e+07	8.76505e+07	5.93792e+07
Q0KL02	Triple functional domain protein [OS=Mus musculus]	Trio	1.28772e+07	1.13976e+07	9.4995e+06	1.11953e+07	1.0036e+07	1.12285e+07	1.14202e+07	1.14324e+07	1.21363e+07	1.13997e+07	1.05605e+07	1.43209e+07
Q01097	Glutamate receptor ionotropic, NMDA 2B [OS=Mus musculus]	Grin2b	2.03099e+07	1.96793e+07	1.77057e+07	1.70409e+07	1.69312e+07	1.66275e+07	1.69324e+07	1.94335e+07	2.48589e+07	2.29902e+07	2.57255e+07	2.35313e+07
Q80TZ3	Putative tyrosine-protein phosphatase auxilin [OS=Mus musculus]	Dnajc6	4.36422e+07	4.91731e+07	4.9229e+07	5.13279e+07	4.31156e+07	4.35367e+07	4.75469e+07	4.9501e+07	4.92392e+07	5.013e+07	5.30484e+07	57054566
Q9JLM8	Serine/threonine-protein kinase DCLK1 [OS=Mus musculus]	Dclk1	3.82258e+07	3.60044e+07	3.88169e+07	3.68502e+07	3.14749e+07	3.20008e+07	3.37006e+07	3.46304e+07	4.05635e+07	4.10604e+07	4.442e+07	4.39084e+07
P05202	Aspartate aminotransferase, mitochondrial [OS=Mus musculus]	Got2	1.79618e+08	2.13416e+08	2.01039e+08	2.15181e+08	1.93635e+08	1.45609e+08	1.85399e+08	1.87773e+08	1.58614e+08	1.68222e+08	2.00444e+08	1.96973e+08
P63101	14-3-3 protein zeta/delta [OS=Mus musculus]	Ywhaz	510472532	5.60511e+08	5.08181e+08	5.35488e+08	5.18498e+08	5.84004e+08	4.93897e+08	5.51705e+08	5.63932e+08	5.65292e+08	5.35849e+08	5.32693e+08
O54991	Contactin-associated protein 1 [OS=Mus musculus]	Cntnap1	1.05926e+08	3.90819e+07	3.8254e+07	3.58498e+07	3.84673e+07	3.97248e+07	3.25235e+07	3.6757e+07	3.34151e+07	3.37934e+07	2.98836e+07	3.37968e+07
Q9DB05	Alpha-soluble NSF attachment protein [OS=Mus musculus]	Napa	4.39457e+07	4.15246e+07	3.80842e+07	4.03125e+07	4.19316e+07	4.14812e+07	4.03076e+07	3.83045e+07	3.65826e+07	3.55429e+07	3.40429e+07	3.65283e+07
Q9QYC0	Alpha-adducin [OS=Mus musculus]	Add1	1.27818e+08	1.23519e+08	1.19735e+08	122906543	1.42216e+08	1.47211e+08	1.38089e+08	1.30114e+08	1.29552e+08	1.30417e+08	1.33699e+08	1.09505e+08
P10852	4F2 cell-surface antigen heavy chain [OS=Mus musculus]	Slc3a2	130852991	1.29859e+08	1.46185e+08	1.30716e+08	1.39171e+08	1.59164e+08	1.32226e+08	1.41883e+08	1.59285e+08	1.44487e+08	1.3804e+08	1.34788e+08
P12382	ATP-dependent 6-phosphofructokinase, liver type [OS=Mus musculus]	Pfkl	2.83551e+07	3.33276e+07	3.18819e+07	3.10492e+07	3.23627e+07	3.15497e+07	3.24336e+07	3.70152e+07	3.33531e+07	3.28375e+07	3.72793e+07	3.31597e+07
Q9JJK2	LanC-like protein 2 [OS=Mus musculus]	Lancl2	3.84377e+07	39251765	3.76186e+07	3.77805e+07	3.87403e+07	4.01138e+07	4.21906e+07	4.059e+07	4.73561e+07	4.59466e+07	4.40311e+07	4.47151e+07
Q9CPW0	Contactin-associated protein-like 2 [OS=Mus musculus]	Cntnap2	3.36877e+07	3.16951e+07	3.17464e+07	3.40748e+07	3.34405e+07	4.18213e+07	3.30422e+07	3.15665e+07	2.86407e+07	2.96091e+07	2.80026e+07	2.54252e+07
Q9QXS6	Drebrin [OS=Mus musculus]	Dbn1	4.17517e+07	4.09952e+07	3.93824e+07	3.54794e+07	3.33486e+07	3.2679e+07	3.5646e+07	3.33239e+07	4.296e+07	4.24501e+07	5.15119e+07	4.48759e+07
O70589	Peripheral plasma membrane protein CASK [OS=Mus musculus]	Cask	2.98316e+07	2.7658e+07	2.95455e+07	2.94345e+07	2.71172e+07	3.42447e+07	2.87314e+07	3.02982e+07	3.08929e+07	3.30764e+07	3.00235e+07	2.87851e+07
P70168	Importin subunit beta-1 [OS=Mus musculus]	Kpnb1	6.29504e+07	5.37625e+07	4.82742e+07	5.20492e+07	4.59356e+07	5.25316e+07	5.87841e+07	5.0668e+07	6.67083e+07	6.0433e+07	5.15625e+07	5.96676e+07
Q61137	Astrotactin-1 [OS=Mus musculus]	Astn1	1.16573e+08	101332893	1.12462e+08	1.0347e+08	9.7168e+07	1.22567e+08	1.11754e+08	1.12362e+08	1.1575e+08	1.23836e+08	1.03977e+08	1.07915e+08
Q9JIS5	Synaptic vesicle glycoprotein 2A [OS=Mus musculus]	Sv2a	1.31221e+08	1.24472e+08	1.31644e+08	1.34046e+08	130636286	1.23592e+08	1.27552e+08	1.28985e+08	1.27734e+08	119968723	1.31617e+08	1.23746e+08
Q922F4	Tubulin beta-6 chain [OS=Mus musculus]	Tubb6	9.51963e+07	8.44389e+07	8.89466e+07	9.59194e+07	8.78099e+07	8.04894e+07	7.9384e+07	131572432	1.17093e+08	9.55934e+07	9.72501e+07	1.13351e+08
Q3UHL1	CaM kinase-like vesicle-associated protein [OS=Mus musculus]	Camkv	8.50776e+07	8.31443e+07	7.97218e+07	7.58335e+07	6.78273e+07	7.71411e+07	7.47244e+07	7.80841e+07	109136996	1.13049e+08	1.07956e+08	1.00675e+08
Q7TQF7	Amphiphysin [OS=Mus musculus]	Amph	8.90115e+07	9.74142e+07	9.0531e+07	9.59967e+07	8.69847e+07	9.1747e+07	8.44074e+07	8.62656e+07	9.20844e+07	9.69142e+07	9.29015e+07	9.70254e+07
Q810U4	Neuronal cell adhesion molecule [OS=Mus musculus]	Nrcam	2.43901e+07	2.23466e+07	2.41075e+07	2.26084e+07	2.20848e+07	2.58516e+07	2.32384e+07	2.56615e+07	2.65391e+07	2.46247e+07	2.27965e+07	2.74796e+07
Q5SSL4	Active breakpoint cluster region-related protein [OS=Mus musculus]	Abr	2.03352e+07	1.86244e+07	1.89735e+07	2.08752e+07	1.74713e+07	1.92304e+07	1.725e+07	2.09626e+07	2.22187e+07	2.33828e+07	2.31909e+07	2.45573e+07
P11627	Neural cell adhesion molecule L1 [OS=Mus musculus]	L1cam	4.02267e+07	4.33342e+07	4.02221e+07	3.93949e+07	3.95938e+07	4.93681e+07	3.74868e+07	4.23261e+07	5.64185e+07	5.68181e+07	4.65765e+07	5.77312e+07
P20029	Endoplasmic reticulum chaperone BiP [OS=Mus musculus]	Hspa5	3.39696e+07	3.94623e+07	3.71826e+07	3.92657e+07	4.941e+07	5.59658e+07	6.36233e+07	5.27028e+07	3.84533e+07	2.9299e+07	4.8862e+07	3.20707e+07
Q9DBJ1	Phosphoglycerate mutase 1 [OS=Mus musculus]	Pgam1	137565423	1.49124e+08	1.4068e+08	1.42563e+08	1.47103e+08	1.43197e+08	1.39248e+08	1.44353e+08	1.47899e+08	1.44385e+08	1.79354e+08	184411630
Q91XV3	Brain acid soluble protein 1 [OS=Mus musculus]	Basp1	2.92554e+08	2.63987e+08	2.6463e+08	265650904	3.84313e+08	4.74654e+08	2.30952e+08	1.75953e+08	3.40975e+08	2.41954e+08	197054253	2.48515e+08
Q9EQF6	Dihydropyrimidinase-related protein 5 [OS=Mus musculus]	Dpysl5	5.01736e+07	5.90646e+07	4.96776e+07	4.77796e+07	4.1746e+07	4.64647e+07	3.92608e+07	4.03985e+07	6.7723e+07	7.56328e+07	6.03767e+07	6.41972e+07
P17156	Heat shock-related 70 kDa protein 2 [OS=Mus musculus]	Hspa2	1.10248e+07	9.31648e+06	8.34542e+06	8.41528e+06	9.40949e+06	9.12921e+06	8.97685e+06	9.04648e+06	13654294	1.42842e+07	1.35938e+07	1.37259e+07
Q9R111	Guanine deaminase [OS=Mus musculus]	Gda	6.48293e+07	6.05248e+07	6.34227e+07	6.38221e+07	6.09466e+07	6.32655e+07	6.14425e+07	6.55587e+07	8.39737e+07	8.28389e+07	8.39319e+07	7.8875e+07
Q9JJZ2	Tubulin alpha-8 chain [OS=Mus musculus]	Tuba8	2.75391e+06	3.3079e+06	2.73593e+06	3.90676e+06	3.79011e+06	4.07404e+06	3.59741e+06	3.40289e+06	1.99776e+06	2.1643e+06	2.92133e+06	2.16486e+06
P68033	Actin, alpha cardiac muscle 1 [OS=Mus musculus]	Actc1	4.14896e+08	4.04067e+08	4.50031e+08	3.44193e+08	3.93748e+08	3.9279e+08	3.97647e+08	4.58599e+08	4.34509e+08	4.1001e+08	4.86021e+08	4.18416e+08
Q9Z1G3	V-type proton ATPase subunit C 1 [OS=Mus musculus]	Atp6v1c1	7.78666e+07	7.25076e+07	7.45517e+07	7.33203e+07	7.57097e+07	7.71556e+07	7.51517e+07	7.70723e+07	7.92847e+07	7.76215e+07	7.88139e+07	7.41276e+07
O08539	Myc box-dependent-interacting protein 1 [OS=Mus musculus]	Bin1	1.10537e+08	9.86818e+07	1.07498e+08	1.07529e+08	1.05646e+08	1.17686e+08	1.05894e+08	1.06776e+08	1.04004e+08	1.01089e+08	9.76178e+07	110392454
Q148V7	RAB11-binding protein RELCH [OS=Mus musculus]	Relch	1.33584e+07	1.32138e+07	1.34903e+07	1.31714e+07	1.30167e+07	1.19697e+07	1.2272e+07	1.37688e+07	1.51114e+07	1.37466e+07	1.31135e+07	1.47754e+07
Q6P9K8	Caskin-1 [OS=Mus musculus]	Caskin1	2.03117e+07	2.12186e+07	2.07218e+07	1.87384e+07	1.79221e+07	2.06994e+07	1.93413e+07	1.82591e+07	2.51631e+07	2.40254e+07	2.61635e+07	2.39646e+07
Q68FF6	ARF GTPase-activating protein GIT1 [OS=Mus musculus]	Git1	3.5004e+07	3.61536e+07	3.03738e+07	3.21269e+07	3.49605e+07	3.75498e+07	3.58821e+07	3.84675e+07	3.26458e+07	3.26388e+07	3.4723e+07	3.49494e+07
Q8BH66	Atlastin-1 [OS=Mus musculus]	Atl1	1.36271e+08	114696084	1.30177e+08	1.29125e+08	1.67625e+08	1.47214e+08	1.37965e+08	1.35467e+08	1.15118e+08	1.26308e+08	1.17165e+08	1.11246e+08
P70175	Disks large homolog 3 [OS=Mus musculus]	Dlg3	2.12813e+07	1.99349e+07	1.94169e+07	1.88754e+07	1.93698e+07	1.71983e+07	1.69271e+07	1.54582e+07	2.58613e+07	2.30028e+07	2.56029e+07	2.37609e+07
Q9Z0H8	CAP-Gly domain-containing linker protein 2 [OS=Mus musculus]	Clip2	7.88759e+07	7.92227e+07	8.99286e+07	9.665e+07	7.11645e+07	7.24569e+07	6.98938e+07	8.32887e+07	7.0487e+07	7.68016e+07	7.30622e+07	9.56211e+07
Q80SW1	S-adenosylhomocysteine hydrolase-like protein 1 [OS=Mus musculus]	Ahcyl1	8.01416e+07	7.79014e+07	8.15464e+07	7.23343e+07	6.52212e+07	8.61122e+07	7.47863e+07	6.4859e+07	9.5595e+07	9.07011e+07	8.86798e+07	7.79358e+07
Q8CHH9	Septin-8 [OS=Mus musculus]	Septin8	1.29202e+08	1.2823e+08	1.35044e+08	1.34007e+08	1.23148e+08	1.29059e+08	1.27e+08	1.24573e+08	134102444	1.34233e+08	1.3925e+08	1.38658e+08
P46660	Alpha-internexin [OS=Mus musculus]	Ina	6.91498e+07	5.04363e+07	6.0188e+07	5.24598e+07	5.23192e+07	3.3368e+07	4.61637e+07	4.39114e+07	2.89904e+07	3.4534e+07	4.38027e+07	5.14677e+07
Q8CAQ8	MICOS complex subunit Mic60 [OS=Mus musculus]	Immt	6.73023e+07	6.2961e+07	6.77172e+07	7.27691e+07	7.16812e+07	5.79658e+07	7.02602e+07	7.03841e+07	5.58586e+07	5.82176e+07	6.52092e+07	6.38967e+07
Q8VDM4	26S proteasome non-ATPase regulatory subunit 2 [OS=Mus musculus]	Psmd2	9.46528e+06	9.84752e+06	9.41274e+06	9.11463e+06	9.84325e+06	9.75133e+06	1.04698e+07	1.12115e+07	1.10021e+07	1.05718e+07	9.82978e+06	1.0307e+07
P10637	Microtubule-associated protein tau [OS=Mus musculus]	Mapt	1.59848e+08	1.75418e+08	1.64612e+08	1.81304e+08	1.41059e+08	1.88553e+08	1.45926e+08	1.3936e+08	2.09251e+08	2.10452e+08	2.09486e+08	2.06499e+08
O08917	Flotillin-1 [OS=Mus musculus]	Flot1	3.51603e+07	3.23665e+07	3.4919e+07	3.31413e+07	3.49635e+07	4.06144e+07	3.72415e+07	3.88721e+07	4.22927e+07	4.36901e+07	4.12492e+07	4.47782e+07
Q811D0	Disks large homolog 1 [OS=Mus musculus]	Dlg1	3.24115e+07	3.38191e+07	3.56794e+07	4.2863e+07	3.64854e+07	3.23979e+07	3.65483e+07	3.17438e+07	3.17272e+07	2.94481e+07	3.65114e+07	3.29519e+07
P61922	4-aminobutyrate aminotransferase, mitochondrial [OS=Mus musculus]	Abat	3.10511e+07	3.59849e+07	3.44602e+07	3.53996e+07	3.91046e+07	1.99566e+07	3.00441e+07	3.03562e+07	2.59668e+07	3.04406e+07	3.93471e+07	3.64464e+07
P42932	T-complex protein 1 subunit theta [OS=Mus musculus]	Cct8	4.74152e+07	5.35461e+07	4.68641e+07	4.41247e+07	5.30787e+07	4.86362e+07	5.44743e+07	5.23167e+07	5.90841e+07	5.54455e+07	4.779e+07	5.26177e+07
P60879	Synaptosomal-associated protein 25 [OS=Mus musculus]	Snap25	3.98779e+08	3.62974e+08	3.78584e+08	4.18388e+08	339581345	3.35286e+08	3.49461e+08	2.90579e+08	3.16639e+08	3.22322e+08	3.09883e+08	3.39967e+08
P08752	Guanine nucleotide-binding protein G(i) subunit alpha-2 [OS=Mus musculus]	Gnai2	9.51218e+07	8.41349e+07	8.6913e+07	8.34919e+07	9.60353e+07	1.02042e+08	9.40284e+07	9.3056e+07	1.09454e+08	1.08066e+08	9.81251e+07	1.02576e+08
P06151	L-lactate dehydrogenase A chain [OS=Mus musculus]	Ldha	1.13241e+08	1.1129e+08	1.11149e+08	1.13215e+08	1.18554e+08	1.30813e+08	1.15878e+08	1.23681e+08	1.34817e+08	1.20894e+08	1.21031e+08	1.15951e+08
P35564	Calnexin [OS=Mus musculus]	Canx	6.33506e+07	6.22372e+07	6.85248e+07	6.75255e+07	6.69149e+07	7.16535e+07	7.18017e+07	6.88291e+07	6.05191e+07	5.81919e+07	7.30942e+07	6.15016e+07
D3YVF0	A-kinase anchor protein 5 [OS=Mus musculus]	Akap5	9.16877e+07	7.54255e+07	9.10019e+07	7.1785e+07	7.59959e+07	9.76605e+07	8.44442e+07	7.82727e+07	8.21468e+07	1.00104e+08	7.95846e+07	7.58838e+07
P06837	Neuromodulin [OS=Mus musculus]	Gap43	1.23749e+08	1.07296e+08	1.16809e+08	1.00024e+08	9.70734e+07	127399423	8.89022e+07	6.44111e+07	1.84307e+08	1.97085e+08	1.56708e+08	1.36283e+08
P60469	Liprin-alpha-3 [OS=Mus musculus]	Ppfia3	2.36316e+07	2.64238e+07	2.29115e+07	2.26597e+07	2.09489e+07	2.24943e+07	2.21189e+07	2.14144e+07	2.50424e+07	2.6344e+07	2.54753e+07	2.4436e+07
Q6PHZ2	Calcium/calmodulin-dependent protein kinase type II subunit delta [OS=Mus musculus]	Camk2d	4.00169e+07	4.07186e+07	3.81984e+07	3.78464e+07	3.23002e+07	3.71262e+07	3.24459e+07	3.3702e+07	5.66613e+07	6.44516e+07	6.24331e+07	6.17342e+07
Q8BG39	Synaptic vesicle glycoprotein 2B [OS=Mus musculus]	Sv2b	9.13004e+07	9.11864e+07	8.64684e+07	9.52365e+07	9.28145e+07	1.01051e+08	1.02256e+08	1.08069e+08	1.02352e+08	8.96262e+07	1.06192e+08	9.9514e+07
Q8BFR5	Elongation factor Tu, mitochondrial [OS=Mus musculus]	Tufm	3.04937e+07	3.35471e+07	3.27578e+07	3.53456e+07	3.12814e+07	2.2959e+07	3.51848e+07	3.19023e+07	2.80825e+07	3.12917e+07	3.73477e+07	3.46758e+07
Q80TE7	Leucine-rich repeat-containing protein 7 [OS=Mus musculus]	Lrrc7	3.39013e+07	1.8961e+07	1.68709e+07	3.39009e+07	1.73323e+07	1.51933e+07	1.74748e+07	1.64085e+07	1.56153e+07	1.81732e+07	1.7852e+07	2.07606e+07
Q9CQV8	14-3-3 protein beta/alpha [OS=Mus musculus]	Ywhab	8.56719e+07	9.016e+07	8.50205e+07	8.64647e+07	8.28616e+07	1.00117e+08	8.68552e+07	9.09464e+07	1.02665e+08	9.9563e+07	9.19001e+07	9.32205e+07
Q8K400	Syntaxin-binding protein 5 [OS=Mus musculus]	Stxbp5	2.65332e+07	2.7837e+07	2.66074e+07	2.40923e+07	2.48016e+07	3.01732e+07	2.66967e+07	2.45807e+07	2.94091e+07	2.57869e+07	2.98867e+07	2.84822e+07
P05063	Fructose-bisphosphate aldolase C [OS=Mus musculus]	Aldoc	6.88309e+07	8.58724e+07	8.47763e+07	8.6332e+07	6.20063e+07	8.42914e+07	7.11202e+07	79222483	1.1753e+08	1.0764e+08	115002206	9.92548e+07
P27773	Protein disulfide-isomerase A3 [OS=Mus musculus]	Pdia3	6.5215e+07	6.59263e+07	7.05442e+07	6.34817e+07	6.98389e+07	8.04927e+07	8.8231e+07	7.53545e+07	6.38416e+07	5.21509e+07	7.59037e+07	6.00108e+07
Q61644	Protein kinase C and casein kinase substrate in neurons protein 1 [OS=Mus musculus]	Pacsin1	1.42595e+08	1.08026e+08	1.27362e+08	1.00383e+08	1.27976e+08	1.14351e+08	1.37789e+08	9.99163e+07	1.40672e+08	1.13379e+08	1.41822e+08	1.05664e+08
P62880	Guanine nucleotide-binding protein G(I)/G(S)/G(T) subunit beta-2 [OS=Mus musculus]	Gnb2	7.17945e+07	5.92494e+07	4.8942e+07	5.61519e+07	6.0333e+07	8.21873e+07	6.74699e+07	5.6075e+07	8.36806e+07	7.91928e+07	6.12748e+07	6.46416e+07
P40124	Adenylyl cyclase-associated protein 1 [OS=Mus musculus]	Cap1	1.64611e+08	1.79864e+08	1.79897e+08	166136441	1.79834e+08	2.33572e+08	1.80344e+08	1.85941e+08	2.04892e+08	2.04947e+08	2.03132e+08	160664780
P62631	Elongation factor 1-alpha 2 [OS=Mus musculus]	Eef1a2	3.90393e+07	4.21795e+07	4.25855e+07	4.4573e+07	3.90755e+07	3.66895e+07	4.16097e+07	4.65019e+07	4.0801e+07	4.24107e+07	4.24744e+07	5.64413e+07
P62874	Guanine nucleotide-binding protein G(I)/G(S)/G(T) subunit beta-1 [OS=Mus musculus]	Gnb1	498796519	4.33274e+08	4.19496e+08	4.17765e+08	4.10062e+08	4.87807e+08	4.24699e+08	4.38096e+08	4.88587e+08	5.3832e+08	4.57043e+08	4.98748e+08
O35136	Neural cell adhesion molecule 2 [OS=Mus musculus]	Ncam2	4.98438e+07	4.4896e+07	5.08223e+07	5.03767e+07	5.18417e+07	5.36736e+07	5.1041e+07	4.92863e+07	6.72823e+07	6.9141e+07	6.51848e+07	6.68181e+07
Q5DQR4	Syntaxin-binding protein 5-like [OS=Mus musculus]	Stxbp5l	2.266e+07	1.95513e+07	2.19518e+07	2.24407e+07	1.94357e+07	1.82627e+07	1.78304e+07	2.04673e+07	2.13782e+07	2.46296e+07	2.11092e+07	2.2429e+07
A2CG49	Kalirin [OS=Mus musculus]	Kalrn	8.15264e+06	7.25877e+06	7.21909e+06	6.47986e+06	5.67071e+06	6.10241e+06	5.55844e+06	5.60614e+06	6.70331e+06	6.93756e+06	7.92998e+06	8.49455e+06
Q61553	Fascin [OS=Mus musculus]	Fscn1	6.16543e+07	5.61479e+07	5.93245e+07	6.55019e+07	7.23306e+07	6.10503e+07	7.1981e+07	6.4301e+07	6.95295e+07	5.98132e+07	6.87836e+07	6.0734e+07
Q04690	Neurofibromin [OS=Mus musculus]	Nf1	1.028e+07	9.61435e+06	9.419e+06	9.34658e+06	1.06021e+07	1.07674e+07	1.00884e+07	1.00769e+07	11350795	1.04999e+07	1.1364e+07	1.02497e+07
Q3TXX4	Vesicular glutamate transporter 1 [OS=Mus musculus]	Slc17a7	1.00885e+08	8.96808e+07	9.77506e+07	8.21285e+07	9.26443e+07	9.18021e+07	9.40663e+07	8.91544e+07	9.77306e+07	8.79512e+07	8.94588e+07	9.18917e+07
P14094	Sodium/potassium-transporting ATPase subunit beta-1 [OS=Mus musculus]	Atp1b1	8.92372e+08	9.33421e+08	9.45148e+08	9.07377e+08	9.43648e+08	9.56395e+08	8.57006e+08	8.97467e+08	9.38815e+08	9.07361e+08	7.84512e+08	8.95809e+08
Q4KUS2	Protein unc-13 homolog A [OS=Mus musculus]	Unc13a	1.01894e+07	8.72052e+06	9.03945e+06	1.08175e+07	8.04385e+06	7.80046e+06	8.0729e+06	9.35743e+06	9.32023e+06	8.97756e+06	9.86137e+06	1.07262e+07
P61982	14-3-3 protein gamma [OS=Mus musculus]	Ywhag	1.99465e+08	1.8876e+08	1.9019e+08	1.7857e+08	1.87749e+08	2.00784e+08	197509911	1.68451e+08	2.21871e+08	2.05626e+08	185150524	1.63159e+08
O70161	Phosphatidylinositol 4-phosphate 5-kinase type-1 gamma [OS=Mus musculus]	Pip5k1c	2.31561e+07	2.6099e+07	2.44429e+07	2.60208e+07	2.43236e+07	2.30179e+07	2.5543e+07	2.62147e+07	2.44346e+07	2.9575e+07	2.63447e+07	3.21297e+07
Q99NE5	Regulating synaptic membrane exocytosis protein 1 [OS=Mus musculus]	Rims1	2.14527e+07	2.1058e+07	2.10628e+07	2.06e+07	1.79123e+07	1.85434e+07	1.97183e+07	1.86332e+07	1.83861e+07	2.15579e+07	2.30458e+07	2.19696e+07
P80318	T-complex protein 1 subunit gamma [OS=Mus musculus]	Cct3	3.21809e+07	3.41853e+07	3.32187e+07	3.28505e+07	3.53195e+07	3.58802e+07	3.72778e+07	3.89206e+07	4.12773e+07	3.8482e+07	3.59571e+07	3.45308e+07
P51830	Adenylate cyclase type 9 [OS=Mus musculus]	Adcy9	2.22275e+07	2.35491e+07	2.18808e+07	2.18649e+07	2.12403e+07	2.06413e+07	2.11946e+07	2.16853e+07	1.83024e+07	1.86855e+07	1.77565e+07	1.89366e+07
Q9R1V6	Disintegrin and metalloproteinase domain-containing protein 22 [OS=Mus musculus]	Adam22	6.19104e+07	5.78486e+07	5.98062e+07	6.57146e+07	5.67187e+07	6.39326e+07	6.25628e+07	6.07447e+07	6.38137e+07	6.354e+07	6.17903e+07	5.84631e+07
Q8C1B7	Septin-11 [OS=Mus musculus]	Septin11	9.22685e+07	9.00971e+07	9.92934e+07	1.03523e+08	8.98533e+07	1.02005e+08	9.60169e+07	9.54447e+07	9.94439e+07	9.75689e+07	9.26399e+07	9.34296e+07
Q9QYS2	Metabotropic glutamate receptor 3 [OS=Mus musculus]	Grm3	5.19379e+07	4.57277e+07	4.76131e+07	5.19848e+07	4.42961e+07	4.91036e+07	4.56079e+07	5.54251e+07	4.87449e+07	4.52688e+07	4.26692e+07	4.93597e+07
Q8BHN3	Neutral alpha-glucosidase AB [OS=Mus musculus]	Ganab	1.31875e+07	1.3352e+07	1.25498e+07	1.24112e+07	1.45626e+07	1.51334e+07	1.7833e+07	1.54348e+07	1.41219e+07	1.26557e+07	1.66201e+07	1.24089e+07
Q99PU5	Long-chain-fatty-acid--CoA ligase ACSBG1 [OS=Mus musculus]	Acsbg1	3.8169e+07	4.06361e+07	3.67789e+07	3.96148e+07	3.92821e+07	4.3666e+07	3.90014e+07	3.9045e+07	3.84032e+07	3.65923e+07	3.86985e+07	3.87468e+07
Q9WV34	MAGUK p55 subfamily member 2 [OS=Mus musculus]	Mpp2	4.33545e+07	3.92122e+07	4.04149e+07	3.98719e+07	4.05598e+07	4.2042e+07	4.36846e+07	4.26022e+07	4.25791e+07	4.15174e+07	4.21245e+07	4.05301e+07
P02088	Hemoglobin subunit beta-1 [OS=Mus musculus]	Hbb-b1	7.27323e+08	8.58958e+08	8.17253e+08	8.9298e+08	8.39393e+08	8.53011e+08	9.43877e+08	1142989569	1.53806e+08	1.64274e+08	5.39373e+07	4.78982e+07
P15508	Spectrin beta chain, erythrocytic [OS=Mus musculus]	Sptb	4.29558e+06	4.28105e+06	5.38964e+06	4.99612e+06	3.82933e+06	2.67509e+06	5.41362e+06	4.5822e+06	2.20959e+06	2.72891e+06	3.22566e+06	2.33311e+06
B2RSH2	Guanine nucleotide-binding protein G(i) subunit alpha-1 [OS=Mus musculus]	Gnai1	3.68215e+07	3.70937e+07	3.51453e+07	3.65117e+07	3.63762e+07	38746995	3.26621e+07	4.09378e+07	4.39047e+07	4.32119e+07	3.69771e+07	4.28764e+07
Q8BUV3	Gephyrin [OS=Mus musculus]	Gphn	3.6632e+07	4.00393e+07	3.97977e+07	4.26938e+07	3.80694e+07	3.43648e+07	3.73757e+07	3.61332e+07	3.34661e+07	3.13693e+07	3.85744e+07	3.5681e+07
Q60932	Voltage-dependent anion-selective channel protein 1 [OS=Mus musculus]	Vdac1	2.27594e+08	2.62564e+08	2.44673e+08	2.53054e+08	2.39587e+08	1.67894e+08	2.21558e+08	2.33948e+08	2.01764e+08	1.9851e+08	2.75101e+08	2.47927e+08
Q9D0K2	Succinyl-CoA:3-ketoacid coenzyme A transferase 1, mitochondrial [OS=Mus musculus]	Oxct1	4.37905e+07	4.71028e+07	4.4242e+07	4.53198e+07	3.8311e+07	3.28918e+07	3.83407e+07	3.7749e+07	3.88208e+07	4.02745e+07	4.60589e+07	4.45297e+07
Q9JI91	Alpha-actinin-2 [OS=Mus musculus]	Actn2	6.03045e+06	7.88991e+06	6.65497e+06	6.80173e+06	6.00873e+06	5.21837e+06	5.75464e+06	7.47492e+06	5.40518e+06	5.96963e+06	6.86764e+06	7.07988e+06
P14211	Calreticulin [OS=Mus musculus]	Calr	3.97128e+07	4.38438e+07	4.4116e+07	4.18578e+07	4.84718e+07	5.02704e+07	6.13858e+07	5.23839e+07	4.29812e+07	3.65826e+07	5.42728e+07	3.93615e+07
Q9Z2Q6	Septin-5 [OS=Mus musculus]	Septin5	1.71384e+08	1.59418e+08	1.64101e+08	1.82456e+08	1.5759e+08	1.70058e+08	1.68e+08	1.61002e+08	1.75347e+08	1.74446e+08	1.67071e+08	1.73434e+08
Q8BGQ7	Alanine--tRNA ligase, cytoplasmic [OS=Mus musculus]	Aars1	2.43876e+07	2.53852e+07	2.53411e+07	2.4498e+07	2.52934e+07	2.84896e+07	2.7061e+07	2.68493e+07	2.12685e+07	2.13225e+07	2.24542e+07	1.99422e+07
P26040	Ezrin [OS=Mus musculus]	Ezr	2.0161e+07	2.09605e+07	2.03206e+07	1.92597e+07	2.11995e+07	2.6387e+07	2.36391e+07	2.06283e+07	2.27188e+07	1.90595e+07	2.2874e+07	1.71278e+07
Q9Z1L5	Voltage-dependent calcium channel subunit alpha-2/delta-3 [OS=Mus musculus]	Cacna2d3	1.90918e+07	1.66787e+07	1.70179e+07	1.62676e+07	1.57072e+07	1.74488e+07	1.56499e+07	1.47407e+07	1.55401e+07	1.49831e+07	1.54913e+07	1.64311e+07
Q61543	Golgi apparatus protein 1 [OS=Mus musculus]	Glg1	1.77714e+07	1.31942e+07	1.53975e+07	1.27697e+07	1.60254e+07	1.61605e+07	2.13079e+07	1.16801e+07	1.65353e+07	1.22078e+07	1.6427e+07	1.01761e+07
Q9Z2W9	Glutamate receptor 3 [OS=Mus musculus]	Gria3	2.23665e+07	21587874	2.20037e+07	2.3643e+07	2.042e+07	1.66811e+07	1.92208e+07	2.06157e+07	1.67333e+07	1.5098e+07	2.20893e+07	20412649
P80313	T-complex protein 1 subunit eta [OS=Mus musculus]	Cct7	4.56138e+07	4.61542e+07	4.52597e+07	4.99448e+07	5.55887e+07	6.09293e+07	5.81996e+07	5.02513e+07	5.22594e+07	4.86161e+07	5.06137e+07	3.68298e+07
P21279	Guanine nucleotide-binding protein G(q) subunit alpha [OS=Mus musculus]	Gnaq	8.92846e+07	8.52505e+07	8.33817e+07	7.99617e+07	7.79339e+07	9.8008e+07	8.24679e+07	8.59149e+07	9.99536e+07	9.65089e+07	8.84268e+07	9.14472e+07
Q9R1T4	Septin-6 [OS=Mus musculus]	Septin6	4.68559e+07	5.80049e+07	5.38341e+07	5.0692e+07	5.18537e+07	5.3933e+07	5.03186e+07	5.43076e+07	4.94288e+07	4.41797e+07	4.75521e+07	5.01556e+07
Q61768	Kinesin-1 heavy chain [OS=Mus musculus]	Kif5b	7.27344e+06	6.98237e+06	6.39057e+06	6.52349e+06	7.39107e+06	7.86344e+06	7.55095e+06	7.31542e+06	7.70045e+06	7.96911e+06	7.65122e+06	6.83556e+06
P15105	Glutamine synthetase [OS=Mus musculus]	Glul	1.73869e+08	192476070	1.85565e+08	1.73137e+08	1.64433e+08	1.94476e+08	1.76127e+08	1.88667e+08	2.12204e+08	229077809	2.22346e+08	2.09321e+08
O88643	Serine/threonine-protein kinase PAK 1 [OS=Mus musculus]	Pak1	5.23672e+07	4.93379e+07	5.28843e+07	5.50777e+07	5.19415e+07	5.75442e+07	5.14953e+07	5.07457e+07	5.30167e+07	5.41522e+07	5.0698e+07	5.31856e+07
P31324	cAMP-dependent protein kinase type II-beta regulatory subunit [OS=Mus musculus]	Prkar2b	7.85463e+07	6.39465e+07	6.76995e+07	7.31258e+07	7.08943e+07	8.01135e+07	6.93061e+07	7.77042e+07	7.99583e+07	8.45886e+07	7.18083e+07	7.86241e+07
P38647	Stress-70 protein, mitochondrial [OS=Mus musculus]	Hspa9	2.71295e+07	3.20994e+07	3.03339e+07	3.09291e+07	2.87291e+07	1.91998e+07	3.05893e+07	2.64435e+07	2.38341e+07	2.49245e+07	3.25813e+07	2.75533e+07
Q9CZ13	Cytochrome b-c1 complex subunit 1, mitochondrial [OS=Mus musculus]	Uqcrc1	6.46666e+07	7.69538e+07	7.18086e+07	7.45129e+07	6.6136e+07	4.79028e+07	7.05062e+07	6.60098e+07	5.68302e+07	6.14645e+07	7.57701e+07	6.77375e+07
P68254	14-3-3 protein theta [OS=Mus musculus]	Ywhaq	7.16357e+07	6.64582e+07	6.39471e+07	6.46919e+07	7.22258e+07	7.2103e+07	6.69892e+07	6.44911e+07	7.30851e+07	7.43938e+07	6.98258e+07	6.47969e+07
Q60864	Stress-induced-phosphoprotein 1 [OS=Mus musculus]	Stip1	1.29676e+08	1.24011e+08	1.09296e+08	1.45913e+08	1.26271e+08	1.37101e+08	1.29722e+08	1.19169e+08	1.24611e+08	1.27392e+08	1.3913e+08	1.10668e+08
Q8R0Y6	Cytosolic 10-formyltetrahydrofolate dehydrogenase [OS=Mus musculus]	Aldh1l1	1.2438e+07	1.56482e+07	1.4237e+07	1.36144e+07	2.36441e+07	1.67006e+07	2.54657e+07	1.72609e+07	1.96165e+07	1.8945e+07	1.85301e+07	1.77042e+07
Q99JY9	Actin-related protein 3 [OS=Mus musculus]	Actr3	4.78657e+07	5.49385e+07	4.82926e+07	5.28679e+07	5.26224e+07	5.85504e+07	5.23545e+07	5.05784e+07	6.36341e+07	6.10327e+07	5.97968e+07	6.24353e+07
Q923T9	Calcium/calmodulin-dependent protein kinase type II subunit gamma [OS=Mus musculus]	Camk2g	2.56166e+07	2.2203e+07	2.37401e+07	2.77189e+07	2.35727e+07	2.40325e+07	2.15256e+07	2.613e+07	1.99784e+07	2.13432e+07	1.8741e+07	2.30222e+07
Q00897	Alpha-1-antitrypsin 1-4 [OS=Mus musculus]	Serpina1d	3.93703e+07	4.70076e+07	4.52354e+07	6.20464e+07	5.6502e+07	3.64379e+07	3.35304e+07	4.5897e+07	1.02227e+06	849591	630395	789179
P97797	Tyrosine-protein phosphatase non-receptor type substrate 1 [OS=Mus musculus]	Sirpa	1.08931e+08	1.04732e+08	1.10068e+08	1.07367e+08	1.22206e+08	133196614	1.28901e+08	1.32732e+08	1.42404e+08	1.46063e+08	1.21571e+08	1.47154e+08
Q60902	Epidermal growth factor receptor substrate 15-like 1 [OS=Mus musculus]	Eps15l1	1.04754e+07	1.11348e+07	1.23676e+07	1.29169e+07	1.13907e+07	1.16954e+07	1.08664e+07	1.15645e+07	1.22515e+07	1.28074e+07	1.45003e+07	1.37623e+07
P05201	Aspartate aminotransferase, cytoplasmic [OS=Mus musculus]	Got1	1.45772e+08	1.45421e+08	153335060	1.55841e+08	1.61235e+08	1.57329e+08	1.55672e+08	1.57289e+08	1.55896e+08	1.52971e+08	1.51456e+08	1.55057e+08
P21278	Guanine nucleotide-binding protein subunit alpha-11 [OS=Mus musculus]	Gna11	1.07731e+08	9.45121e+07	1.06926e+08	8.57727e+07	8.57157e+07	9.67089e+07	8.90128e+07	9.12817e+07	100088068	1.15753e+08	8.91774e+07	1.01602e+08
P26443	Glutamate dehydrogenase 1, mitochondrial [OS=Mus musculus]	Glud1	3.47231e+07	4.72751e+07	4.18882e+07	4.09472e+07	3.73695e+07	2.74506e+07	4.36484e+07	3.99622e+07	3.25394e+07	3.56475e+07	4.93528e+07	4.14062e+07
Q8R0S2	IQ motif and SEC7 domain-containing protein 1 [OS=Mus musculus]	Iqsec1	3.90543e+07	3.93602e+07	3.92504e+07	4.28438e+07	3.81629e+07	3.84767e+07	3.88189e+07	3.76258e+07	4.33428e+07	4.00098e+07	3.83873e+07	3.87334e+07
Q6PH08	ERC protein 2 [OS=Mus musculus]	Erc2	3.3316e+07	2.98863e+07	3.20654e+07	3.28089e+07	2.94041e+07	3.00281e+07	2.9944e+07	2.91103e+07	3.56007e+07	3.43372e+07	3.6917e+07	3.30894e+07
P08551	Neurofilament light polypeptide [OS=Mus musculus]	Nefl	9.08354e+07	7.13845e+07	8.08511e+07	7.32614e+07	7.35e+07	5.58042e+07	7.02301e+07	5.89599e+07	5.60594e+07	5.88541e+07	6.54789e+07	6.17822e+07
A2APX8	Sodium channel protein type 1 subunit alpha [OS=Mus musculus]	Scn1a	4.53606e+06	3.43506e+06	3.85715e+06	4.78762e+06	5.1241e+06	4.02764e+06	4.54465e+06	3.58795e+06	2.35257e+06	2.22743e+06	2.3578e+06	2.61012e+06
Q9Z140	Copine-6 [OS=Mus musculus]	Cpne6	2.48746e+07	3.47635e+07	2.59848e+07	1.65936e+07	2.02713e+07	2.83591e+07	2.01866e+07	2.23498e+07	3.83923e+07	3.91342e+07	4.37869e+07	3.91011e+07
P26041	Moesin [OS=Mus musculus]	Msn	3.3268e+07	3.38875e+07	3.34937e+07	3.35483e+07	4.47327e+07	5.20759e+07	5.36161e+07	5.09588e+07	2.97462e+07	3.12869e+07	3.85962e+07	2.90204e+07
Q9WVK4	EH domain-containing protein 1 [OS=Mus musculus]	Ehd1	1.03719e+07	9.58895e+06	8.52243e+06	8.93586e+06	8.83418e+06	1.0697e+07	1.02034e+07	8.93619e+06	9.42331e+06	9.6486e+06	7.78265e+06	9.37734e+06
P42859	Huntingtin [OS=Mus musculus]	Htt	7.76785e+06	8.42051e+06	6.98818e+06	7.6496e+06	8.35516e+06	9.57665e+06	7.94863e+06	9.20131e+06	8.73653e+06	6.95745e+06	7.03009e+06	6.95175e+06
Q8CHG7	Rap guanine nucleotide exchange factor 2 [OS=Mus musculus]	Rapgef2	8.22911e+06	8.14894e+06	7.27623e+06	7.70207e+06	6.36762e+06	6.85627e+06	6.83738e+06	7.33487e+06	1.10063e+07	1.06149e+07	1.06072e+07	1.0556e+07
Q8K2B3	Succinate dehydrogenase [ubiquinone] flavoprotein subunit, mitochondrial [OS=Mus musculus]	Sdha	4.9488e+07	5.20791e+07	4.12567e+07	4.15348e+07	4.32998e+07	3.40551e+07	4.17786e+07	3.74493e+07	3.59757e+07	3.68225e+07	5.04799e+07	4.26033e+07
P08249	Malate dehydrogenase, mitochondrial [OS=Mus musculus]	Mdh2	287344108	3.22741e+08	2.83897e+08	3.06678e+08	2.81215e+08	2.22746e+08	2.94122e+08	2.88929e+08	2.46715e+08	2.64945e+08	3.1796e+08	2.76047e+08
P80315	T-complex protein 1 subunit delta [OS=Mus musculus]	Cct4	3.17579e+07	2.87702e+07	2.75248e+07	2.67559e+07	3.68601e+07	3.47567e+07	3.66129e+07	2.77962e+07	3.45683e+07	3.26772e+07	3.19409e+07	3.20234e+07
P80316	T-complex protein 1 subunit epsilon [OS=Mus musculus]	Cct5	2.49912e+07	2.72578e+07	2.67025e+07	2.87726e+07	2.75599e+07	3.13252e+07	33136452	3.04614e+07	31184199	3.36784e+07	2.78538e+07	3.03004e+07
Q9R0P9	Ubiquitin carboxyl-terminal hydrolase isozyme L1 [OS=Mus musculus]	Uchl1	8.62196e+07	9.76967e+07	9.22206e+07	9.3622e+07	1.00014e+08	1.10534e+08	1.01898e+08	9.75227e+07	1.08544e+08	1.15045e+08	115495937	1.02633e+08
Q8VDQ8	NAD-dependent protein deacetylase sirtuin-2 [OS=Mus musculus]	Sirt2	8.20743e+07	7.0202e+07	6.93737e+07	7.07163e+07	8.84653e+07	6.29687e+07	7.71792e+07	6.68982e+07	5.07318e+07	6.65541e+07	5.82206e+07	5.80311e+07
Q6ZQ18	Protein EFR3 homolog B [OS=Mus musculus]	Efr3b	1.54473e+07	1.44923e+07	1.46801e+07	1.37734e+07	1.59866e+07	1.47823e+07	1.47923e+07	1.35868e+07	1.21677e+07	1.6147e+07	1.2727e+07	1.304e+07
P22599	Alpha-1-antitrypsin 1-2 [OS=Mus musculus]	Serpina1b	4.2773e+06	4.66784e+06	4.136e+06	6.96975e+06	5.50399e+06	3.36777e+06	4.65025e+06	4.89635e+06	188859	180899	183988	189636
Q60625	Intercellular adhesion molecule 5 [OS=Mus musculus]	Icam5	6.02978e+07	5.83015e+07	5.86788e+07	5.09244e+07	5.45178e+07	6.01722e+07	5.55001e+07	5.33821e+07	8.88978e+07	8.17129e+07	8.61981e+07	7.45852e+07
Q80TR1	Adhesion G protein-coupled receptor L1 [OS=Mus musculus]	Adgrl1	1.34884e+07	1.14503e+07	1.19037e+07	1.24345e+07	1.06575e+07	1.22009e+07	1.14032e+07	1.19517e+07	1.28122e+07	1.15503e+07	1.13992e+07	1.22366e+07
Q9JKR6	Hypoxia up-regulated protein 1 [OS=Mus musculus]	Hyou1	1.00708e+07	1.09336e+07	8.7666e+06	1.06645e+07	1.04795e+07	1.10927e+07	1.19909e+07	1.088e+07	8.64771e+06	7.03794e+06	1.16201e+07	9.20975e+06
P48962	ADP/ATP translocase 1 [OS=Mus musculus]	Slc25a4	3.29601e+08	3.59303e+08	3.43145e+08	3.76374e+08	3.28482e+08	2.33862e+08	3.44855e+08	3.57817e+08	2.87768e+08	2.73939e+08	3.81738e+08	3.43417e+08
P01027	Complement C3 [OS=Mus musculus]	C3	3.92256e+07	3.63797e+07	3.97809e+07	4.04679e+07	3.67691e+07	2.8039e+07	3.434e+07	3.73619e+07	2.40617e+07	2.86793e+07	2.72728e+07	2.79804e+07
P62482	Voltage-gated potassium channel subunit beta-2 [OS=Mus musculus]	Kcnab2	4.18572e+07	3.80196e+07	4.04865e+07	4.25887e+07	3.6774e+07	3.47342e+07	3.65428e+07	4.19942e+07	3.60395e+07	3.2663e+07	3.11804e+07	3.92313e+07
Q9CZU6	Citrate synthase, mitochondrial [OS=Mus musculus]	Cs	9.04393e+07	9.64123e+07	9.97849e+07	9.78494e+07	8.47333e+07	5.73027e+07	8.25512e+07	8.60465e+07	7.85921e+07	8.60346e+07	1.07588e+08	1.00668e+08
P80317	T-complex protein 1 subunit zeta [OS=Mus musculus]	Cct6a	2.41751e+07	2.43295e+07	2.42126e+07	2.29553e+07	2.54325e+07	2.39137e+07	2.55207e+07	2.61776e+07	2.66782e+07	2.56384e+07	2.32532e+07	2.41643e+07
Q6R891	Neurabin-2 [OS=Mus musculus]	Ppp1r9b	3.98575e+07	3.50397e+07	3.68206e+07	3.35959e+07	3.33349e+07	3.03522e+07	4.06887e+07	2.76964e+07	3.29135e+07	3.73983e+07	4.40994e+07	3.96859e+07
Q9JLN9	Serine/threonine-protein kinase mTOR [OS=Mus musculus]	Mtor	5.28881e+06	4.28349e+06	4.26427e+06	4.8291e+06	5.57205e+06	3.98774e+06	4.48354e+06	3.97275e+06	5.81786e+06	6.21592e+06	4.66755e+06	4.53717e+06
Q9ERK4	Exportin-2 [OS=Mus musculus]	Cse1l	7.22399e+06	7.52631e+06	6.08223e+06	7.70466e+06	8.73891e+06	9.55042e+06	8.22346e+06	8.53915e+06	9.27715e+06	9.38015e+06	6.39337e+06	5.7218e+06
Q9DC69	NADH dehydrogenase [ubiquinone] 1 alpha subcomplex subunit 9, mitochondrial [OS=Mus musculus]	Ndufa9	1.9297e+07	2.30016e+07	2.38879e+07	2.30148e+07	2.21877e+07	1.41877e+07	2.06237e+07	2.03631e+07	2.12515e+07	2.15427e+07	2.37055e+07	2.31352e+07
E9Q6P5	Tetratricopeptide repeat protein 7B [OS=Mus musculus]	Ttc7b	3.91067e+07	3.43586e+07	3.52511e+07	3.67084e+07	4.05581e+07	4.36451e+07	4.19633e+07	3.6706e+07	4.28495e+07	4.45764e+07	4.11457e+07	3.76476e+07
Q8BFZ3	Beta-actin-like protein 2 [OS=Mus musculus]	Actbl2	3.58848e+08	4.94806e+08	4.60952e+08	3.88076e+08	5.11282e+08	4.76709e+08	6.43601e+08	5.00854e+08	4.46805e+08	4.18715e+08	4.49522e+08	4.43041e+08
Q8BKX1	Brain-specific angiogenesis inhibitor 1-associated protein 2 [OS=Mus musculus]	Baiap2	4.68075e+07	4.73747e+07	3.94571e+07	4.31009e+07	3.79118e+07	3.94946e+07	4.6095e+07	5.44241e+07	4.65202e+07	4.62309e+07	5.1161e+07	5.32418e+07
Q05920	Pyruvate carboxylase, mitochondrial [OS=Mus musculus]	Pc	2.30902e+07	2.92777e+07	2.64394e+07	2.90426e+07	2.31295e+07	1.6375e+07	2.50282e+07	2.89151e+07	2.22612e+07	2.15338e+07	2.5041e+07	3.13757e+07
Q8BKC5	Importin-5 [OS=Mus musculus]	Ipo5	8.78719e+06	1.11373e+07	1.06929e+07	1.30969e+07	1.19672e+07	1.17963e+07	1.19172e+07	1.24369e+07	1.00477e+07	1.1653e+07	1.12486e+07	1.12442e+07
Q9QYG0	Protein NDRG2 [OS=Mus musculus]	Ndrg2	3.57168e+07	4.08989e+07	3.83148e+07	4.1717e+07	3.81527e+07	4.06499e+07	3.27077e+07	4.75048e+07	5.31818e+07	5.81167e+07	5.35684e+07	6.58823e+07
P68510	14-3-3 protein eta [OS=Mus musculus]	Ywhah	1.98163e+08	1.70796e+08	1.89835e+08	1.53458e+08	1.90146e+08	1.88244e+08	214382446	1.68271e+08	1.92144e+08	1.63287e+08	1.87197e+08	1.42364e+08
Q8CGY8	UDP-N-acetylglucosamine--peptide N-acetylglucosaminyltransferase 110 kDa subunit [OS=Mus musculus]	Ogt	1.63002e+07	1.66898e+07	1.517e+07	1.73367e+07	1.57529e+07	1.59896e+07	1.89712e+07	1.72491e+07	1.70431e+07	1.50774e+07	1.85796e+07	1.65251e+07
P07758	Alpha-1-antitrypsin 1-1 [OS=Mus musculus]	Serpina1a	2.32184e+07	4.14433e+07	2.56753e+07	3.51483e+07	2.97658e+07	1.9737e+07	2.631e+07	2.46232e+07	279334		137797	224559
Q62277	Synaptophysin [OS=Mus musculus]	Syp	1.20807e+08	1.24721e+08	1.11627e+08	102873790	1.16909e+08	1.26593e+08	1.13089e+08	1.16067e+08	1.23577e+08	1.25432e+08	1.18373e+08	1.08806e+08
Q9CZW5	Mitochondrial import receptor subunit TOM70 [OS=Mus musculus]	Tomm70	1.96718e+07	2.43897e+07	2.4489e+07	2.25947e+07	1.90966e+07	1.66571e+07	2.15622e+07	2.78446e+07	1.90097e+07	2.15814e+07	24270875	3.33577e+07
Q8BLE7	Vesicular glutamate transporter 2 [OS=Mus musculus]	Slc17a6	1.15483e+07	1.15955e+07	1.40419e+07	1.13441e+07	9.88441e+06	1.03251e+07	1.01336e+07	9.2356e+06	1.19181e+07	1.20137e+07	1.08917e+07	1.14303e+07
A2AGT5	Cytoskeleton-associated protein 5 [OS=Mus musculus]	Ckap5	2.89561e+07	3.40745e+07	2.94968e+07	2.99386e+07	3.36467e+07	3.33377e+07	3.31652e+07	3.55206e+07	3.1599e+07	3.12328e+07	3.27247e+07	3.35492e+07
P26638	Serine--tRNA ligase, cytoplasmic [OS=Mus musculus]	Sars1	1.3141e+07	1.39545e+07	1.24238e+07	1.27485e+07	1.46893e+07	1.49492e+07	1.53548e+07	1.47865e+07	1.49833e+07	1.31048e+07	1.30462e+07	1.27115e+07
Q8R5H6	Wiskott-Aldrich syndrome protein family member 1 [OS=Mus musculus]	Wasf1	3.73109e+07	3.41555e+07	3.46007e+07	3.38906e+07	3.15597e+07	3.34915e+07	3.25903e+07	3.03864e+07	3.37746e+07	3.42939e+07	4.12263e+07	3.88146e+07
P31938	Dual specificity mitogen-activated protein kinase kinase 1 [OS=Mus musculus]	Map2k1	3.45097e+07	4.13873e+07	3.7477e+07	3.68112e+07	3.99278e+07	4.13955e+07	3.78572e+07	4.08517e+07	4.09949e+07	4.54627e+07	4.29313e+07	4.0931e+07
P51863	V-type proton ATPase subunit d 1 [OS=Mus musculus]	Atp6v0d1	1.404e+08	1.2663e+08	1.33662e+08	1.31211e+08	1.32686e+08	1.20582e+08	1.30441e+08	1.2456e+08	1.14973e+08	1.08335e+08	9.5642e+07	1.19504e+08
O08749	Dihydrolipoyl dehydrogenase, mitochondrial [OS=Mus musculus]	Dld	4.42222e+07	4.67623e+07	4.3668e+07	3.9896e+07	4.0013e+07	3.14942e+07	4.53146e+07	4.10441e+07	3.92751e+07	3.95664e+07	4.37558e+07	4.38276e+07
P61164	Alpha-centractin [OS=Mus musculus]	Actr1a	4.69429e+07	4.41592e+07	4.29951e+07	4.47043e+07	4.97516e+07	4.99536e+07	4.97113e+07	4.71968e+07	5.44361e+07	5.29216e+07	4.74898e+07	4.77591e+07
P97300	Neuroplastin [OS=Mus musculus]	Nptn	1.88804e+08	1.66756e+08	181880184	1.91708e+08	1.66631e+08	170231837	1.78029e+08	1.87776e+08	1.76447e+08	1.65428e+08	1.68117e+08	1.78281e+08
O70443	Guanine nucleotide-binding protein G(z) subunit alpha [OS=Mus musculus]	Gnaz	5.61293e+07	5.31309e+07	5.43298e+07	5.3097e+07	4.95935e+07	5.70533e+07	5.23407e+07	5.5843e+07	6.19689e+07	5.90097e+07	5.64541e+07	6.0683e+07
Q8C8N2	Protein SCAI [OS=Mus musculus]	Scai	1.5395e+07	1.68477e+07	1.48512e+07	1.64537e+07	1.57725e+07	1.70173e+07	1.62387e+07	1.74409e+07	2.49719e+07	1.42083e+07	1.42119e+07	1.40846e+07
P26645	Myristoylated alanine-rich C-kinase substrate [OS=Mus musculus]	Marcks	4.50667e+07	4.70359e+07	3.96876e+07	4.47831e+07	4.94993e+07	5.78365e+07	4.68395e+07	4.53371e+07	6.0313e+07	6.7982e+07	6.06381e+07	5.89187e+07
O89053	Coronin-1A [OS=Mus musculus]	Coro1a	7.59827e+07	7.11022e+07	7.07365e+07	7.20892e+07	7.07487e+07	6.66123e+07	7.38809e+07	6.85722e+07	7.99286e+07	7.08628e+07	8.11216e+07	7.37602e+07
P10630	Eukaryotic initiation factor 4A-II [OS=Mus musculus]	Eif4a2	4.55336e+07	4.27174e+07	4.58509e+07	4.11591e+07	4.21977e+07	4.23796e+07	4.72626e+07	4.43085e+07	4.21785e+07	4.25997e+07	4.54095e+07	4.25316e+07
Q8R1Q8	Cytoplasmic dynein 1 light intermediate chain 1 [OS=Mus musculus]	Dync1li1	2.01456e+07	2.05705e+07	1.91311e+07	1.97108e+07	2.39581e+07	2.47622e+07	2.06531e+07	1.84875e+07	2.46595e+07	2.31585e+07	2.38408e+07	2.26815e+07
Q9CYT6	Adenylyl cyclase-associated protein 2 [OS=Mus musculus]	Cap2	3.14634e+07	3.26737e+07	3.21268e+07	3.33617e+07	3.15323e+07	3.2961e+07	3.21632e+07	3.28846e+07	3.34139e+07	3.27416e+07	3.20872e+07	3.43354e+07
Q80YA9	Connector enhancer of kinase suppressor of ras 2 [OS=Mus musculus]	Cnksr2	9.85936e+06	9.51303e+06	8.91649e+06	9.01326e+06	7.63804e+06	7.36699e+06	8.72244e+06	8.8267e+06	1.03901e+07	9.7173e+06	1.23335e+07	1.21643e+07
Q62420	Endophilin-A1 [OS=Mus musculus]	Sh3gl2	1.50064e+08	1.61438e+08	1.53076e+08	1.67394e+08	1.52463e+08	1.59372e+08	150481662	1.54938e+08	1.45451e+08	1.44783e+08	149948630	1.43959e+08
P30275	Creatine kinase U-type, mitochondrial [OS=Mus musculus]	Ckmt1	5.82649e+07	6.91293e+07	6.21499e+07	6.12216e+07	6.026e+07	4.60619e+07	5.64982e+07	5.92401e+07	5.66477e+07	6.28831e+07	6.51918e+07	6.22037e+07
Q9Z2Y3	Homer protein homolog 1 [OS=Mus musculus]	Homer1	5.36644e+07	5.05682e+07	5.11019e+07	5.80774e+07	4.38392e+07	4.54962e+07	5.14961e+07	4.90013e+07	4.92563e+07	4.72786e+07	5.59335e+07	5.09574e+07
P33173	Kinesin-like protein KIF1A [OS=Mus musculus]	Kif1a	9.8109e+06	9.94426e+06	1.02852e+07	9.53924e+06	1.04558e+07	1.03327e+07	9.86914e+06	1.14784e+07	1.09001e+07	1.07272e+07	1.01215e+07	1.09339e+07
P50518	V-type proton ATPase subunit E 1 [OS=Mus musculus]	Atp6v1e1	1.33802e+08	1.33215e+08	1.3138e+08	1.3554e+08	1.38018e+08	1.38981e+08	1.4385e+08	1.42352e+08	1.41521e+08	1.32445e+08	1.54574e+08	1.4318e+08
Q9DB77	Cytochrome b-c1 complex subunit 2, mitochondrial [OS=Mus musculus]	Uqcrc2	7.41025e+07	9.1815e+07	8.70529e+07	8.88456e+07	8.7114e+07	5.9135e+07	8.57e+07	8.51541e+07	7.32429e+07	7.52512e+07	9.6761e+07	8.50477e+07
Q9WV27	Sodium/potassium-transporting ATPase subunit alpha-4 [OS=Mus musculus]	Atp1a4				409585	544224		233001	385097
Q8R366	Immunoglobulin superfamily member 8 [OS=Mus musculus]	Igsf8	5.08319e+07	4.50703e+07	5.7344e+07	5.44163e+07	4.86566e+07	5.4172e+07	4.42872e+07	5.02845e+07	5.30992e+07	5.51128e+07	4.79473e+07	6.0759e+07
Q2PFD7	PH and SEC7 domain-containing protein 3 [OS=Mus musculus]	Psd3	4.05645e+07	3.93582e+07	4.15744e+07	3.62838e+07	3.77194e+07	3.73817e+07	3.97879e+07	3.6114e+07	4.38506e+07	4.84395e+07	4.5621e+07	4.34513e+07
P62141	Serine/threonine-protein phosphatase PP1-beta catalytic subunit [OS=Mus musculus]	Ppp1cb	7.79422e+06	7.44586e+06	7.31141e+06	7.59952e+06	6.81304e+06	6.8565e+06	6.9865e+06	6.82942e+06	8.1551e+06	7.0722e+06	8.66869e+06	8.14662e+06
Q3UHD9	Arf-GAP with GTPase, ANK repeat and PH domain-containing protein 2 [OS=Mus musculus]	Agap2	2.76719e+07	2.92853e+07	3.0039e+07	2.71256e+07	2.97646e+07	2.53671e+07	3.0335e+07	3.03315e+07	2.4127e+07	2.79317e+07	2.70206e+07	3.37068e+07
Q80TL4	PHD finger protein 24 [OS=Mus musculus]	Phf24	5.02257e+07	4.38478e+07	4.37996e+07	4.54734e+07	5.00859e+07	5.71985e+07	5.70548e+07	4.23483e+07	5.3318e+07	4.99423e+07	4.28857e+07	4.08695e+07
P46097	Synaptotagmin-2 [OS=Mus musculus]	Syt2	1.17761e+07	1.14131e+07	1.34958e+07	1.4083e+07	1.151e+07	1.13842e+07	1.12377e+07	1.16342e+07	7.9532e+06	7.19311e+06	5.78599e+06	6.86817e+06
P63087	Serine/threonine-protein phosphatase PP1-gamma catalytic subunit [OS=Mus musculus]	Ppp1cc	4.37788e+07	4.26743e+07	3.77811e+07	3.78053e+07	4.13307e+07	4.58982e+07	4.59549e+07	3.90861e+07	4.37016e+07	4.49566e+07	4.44627e+07	3.99198e+07
P17751	Triosephosphate isomerase [OS=Mus musculus]	Tpi1	2.01338e+08	2.04822e+08	1.83246e+08	2.01894e+08	1.97049e+08	2.12986e+08	1.92285e+08	2.12091e+08	2.09634e+08	2.14502e+08	2.06536e+08	2.09237e+08
P35486	Pyruvate dehydrogenase E1 component subunit alpha, somatic form, mitochondrial [OS=Mus musculus]	Pdha1	1.68937e+08	1.57968e+08	1.44183e+08	1.56678e+08	1.7931e+08	1.67096e+08	1.48089e+08	1.18639e+08	1.15109e+08	1.62971e+08	1.48898e+08	1.03898e+08
Q14BI2	Metabotropic glutamate receptor 2 [OS=Mus musculus]	Grm2	2.14651e+07	2.11759e+07	2.20515e+07	2.12653e+07	2.09512e+07	2.30482e+07	1.89482e+07	2.32613e+07	2.66539e+07	2.02569e+07	1.6028e+07	1.94202e+07
O35382	Exocyst complex component 4 [OS=Mus musculus]	Exoc4	1.13289e+07	1.03791e+07	9.88567e+06	1.16388e+07	9.6937e+06	1.08341e+07	1.13852e+07	9.02367e+06	1.16023e+07	1.18426e+07	1.18819e+07	1.15421e+07
Q9Z1S5	Neuronal-specific septin-3 [OS=Mus musculus]	Septin3	7.31957e+07	7.52105e+07	7.55918e+07	7.41821e+07	7.56341e+07	7.09133e+07	6.83724e+07	7.5566e+07	7.41911e+07	7.32339e+07	7.33653e+07	7.4047e+07
Q03137	Ephrin type-A receptor 4 [OS=Mus musculus]	Epha4	2.14917e+07	2.07867e+07	1.60571e+07	1.52348e+07	1.76847e+07	1.94312e+07	1.62079e+07	1.74324e+07	1.70632e+07	1.40635e+07	1.60699e+07	1.66287e+07
Q8R5C5	Beta-centractin [OS=Mus musculus]	Actr1b	1.1649e+07	1.08407e+07	1.07328e+07	1.1058e+07	1.13078e+07	1.02703e+07	9.63227e+06	1.10533e+07	1.22343e+07	1.22619e+07	1.24732e+07	1.13545e+07
Q9CWZ7	Gamma-soluble NSF attachment protein [OS=Mus musculus]	Napg	7.81911e+07	8.35815e+07	8.44819e+07	84270844	7.7808e+07	8.56258e+07	7.39731e+07	7.60671e+07	8.70364e+07	8.41898e+07	7.97716e+07	8.53246e+07
Q9Z2I0	Mitochondrial proton/calcium exchanger protein [OS=Mus musculus]	Letm1	2.84888e+07	2.60986e+07	2.4414e+07	2.54968e+07	2.18277e+07	2.20143e+07	2.25958e+07	2.63467e+07	2.92563e+07	3.04692e+07	2.73018e+07	3.58153e+07
Q812A2	SLIT-ROBO Rho GTPase-activating protein 3 [OS=Mus musculus]	Srgap3	1.17901e+07	1.18806e+07	1.21201e+07	1.2132e+07	1.17408e+07	1.09295e+07	1.13018e+07	1.0817e+07	1.40388e+07	1.1948e+07	1.46846e+07	1.45547e+07
Q8BLQ9	Cell adhesion molecule 2 [OS=Mus musculus]	Cadm2	109918298	9.54274e+07	1.03246e+08	9.47852e+07	9.21787e+07	1.1235e+08	9.18868e+07	9.57063e+07	9.29798e+07	8.59766e+07	8.18017e+07	8.93222e+07
P62761	Visinin-like protein 1 [OS=Mus musculus]	Vsnl1	2.5209e+08	2.27976e+08	2.33048e+08	2.41365e+08	2.11076e+08	2.52807e+08	2.20149e+08	2.22443e+08	2.46154e+08	2.42653e+08	2.23419e+08	2.40378e+08
Q8K212	Phosphofurin acidic cluster sorting protein 1 [OS=Mus musculus]	Pacs1	2.34482e+07	2.32159e+07	2.51345e+07	2.90096e+07	2.31067e+07	2.50691e+07	2.51527e+07	2.38404e+07	3.18824e+07	2.91354e+07	3.10097e+07	3.23514e+07
Q9D0F9	Phosphoglucomutase-1 [OS=Mus musculus]	Pgm1	1.16807e+07	1.31436e+07	1.39021e+07	1.20356e+07	1.1971e+07	1.44906e+07	1.07764e+07	1.31325e+07	1.72399e+07	1.74843e+07	1.737e+07	1.69268e+07
P68181	cAMP-dependent protein kinase catalytic subunit beta [OS=Mus musculus]	Prkacb	5.18809e+07	4.80277e+07	5.1382e+07	5.05501e+07	5.08249e+07	5.72082e+07	5.55792e+07	5.71279e+07	5.57606e+07	5.56287e+07	5.01718e+07	5.6454e+07
P20444	Protein kinase C alpha type [OS=Mus musculus]	Prkca	1.06633e+07	9.8985e+06	7.89054e+06	7.68493e+06	9.91813e+06	8.40919e+06	9.20333e+06	9.2533e+06	9.44303e+06	9.1747e+06	9.32981e+06	8.26214e+06
Q9D6R2	Isocitrate dehydrogenase [NAD] subunit alpha, mitochondrial [OS=Mus musculus]	Idh3a	1.18835e+08	1.2406e+08	1.2543e+08	1.35509e+08	1.18849e+08	9.0848e+07	119864720	1.15547e+08	9.88447e+07	1.10242e+08	1.24588e+08	1.15514e+08
Q3UVX5	Metabotropic glutamate receptor 5 [OS=Mus musculus]	Grm5	1.55323e+07	1.35511e+07	1.35782e+07	1.2479e+07	1.0985e+07	1.35617e+07	1.23625e+07	1.08541e+07	1.65205e+07	1.681e+07	1.52735e+07	1.45588e+07
P26043	Radixin [OS=Mus musculus]	Rdx	6.03257e+06	5.45079e+06	5.77061e+06	6.50416e+06	6.4453e+06	7.2954e+06	6.10381e+06	5.82606e+06	6.46966e+06	7.32483e+06	6.40347e+06	6.34343e+06
Q9EPL8	Importin-7 [OS=Mus musculus]	Ipo7	7.41144e+06	7.74129e+06	7.228e+06	8.12433e+06	6.42647e+06	6.42815e+06	8.00533e+06	8.32254e+06	1.03033e+07	8.81441e+06	8.17061e+06	8.17995e+06
P35438	Glutamate receptor ionotropic, NMDA 1 [OS=Mus musculus]	Grin1	2.64943e+07	2.98561e+07	2.85566e+07	2.60401e+07	2.54492e+07	2.23556e+07	2.60156e+07	2.53243e+07	3.2598e+07	2.94904e+07	3.42848e+07	3.10135e+07
Q8BGZ1	Hippocalcin-like protein 4 [OS=Mus musculus]	Hpcal4	4.13323e+07	4.07642e+07	3.61013e+07	4.03135e+07	4.19858e+07	4.51883e+07	4.21637e+07	4.3468e+07	5.70949e+07	5.57938e+07	5.48639e+07	5.31168e+07
Q9R0Q6	Actin-related protein 2/3 complex subunit 1A [OS=Mus musculus]	Arpc1a	4.53924e+07	4.59478e+07	4.31461e+07	4.17983e+07	4.58593e+07	4.29889e+07	4.04904e+07	4.35556e+07	5.41602e+07	4.69578e+07	4.80421e+07	4.62374e+07
P48453	Serine/threonine-protein phosphatase 2B catalytic subunit beta isoform [OS=Mus musculus]	Ppp3cb	1.79604e+07	1.91759e+07	1.70575e+07	1.72714e+07	1.67788e+07	1.87708e+07	1.90239e+07	1.76242e+07	2.04624e+07	2.02225e+07	2.12748e+07	1.87248e+07
P35802	Neuronal membrane glycoprotein M6-a [OS=Mus musculus]	Gpm6a	8.71807e+08	8.73378e+08	833004175	7.32812e+08	7.66828e+08	1038822285	7.93404e+08	7.5064e+08	1026985645	9.47493e+08	8.19446e+08	7.84637e+08
Q3TXS7	26S proteasome non-ATPase regulatory subunit 1 [OS=Mus musculus]	Psmd1	1.01774e+07	1.05604e+07	1.00406e+07	1.06116e+07	1.18514e+07	1.25315e+07	1.25063e+07	1.09941e+07	9.42473e+06	8.83406e+06	8.96427e+06	8.95648e+06
P23818	Glutamate receptor 1 [OS=Mus musculus]	Gria1	1.40573e+07	1.57024e+07	1.32347e+07	8.63739e+06	9.62846e+06	1.14887e+07	1.0295e+07	1.00058e+07	1.18406e+07	1.16337e+07	1.48016e+07	1.30747e+07
Q9Z0R4	Intersectin-1 [OS=Mus musculus]	Itsn1	1.123e+07	1.03065e+07	1.14022e+07	1.11031e+07	1.14283e+07	1.14269e+07	1.18806e+07	1.07685e+07	1.19852e+07	1.22208e+07	1.31439e+07	1.13647e+07
Q9WU78	Programmed cell death 6-interacting protein [OS=Mus musculus]	Pdcd6ip	1.57359e+07	1.65361e+07	1.52773e+07	1.52648e+07	1.67316e+07	1.8022e+07	1.74025e+07	1.56411e+07	1.68408e+07	1.70437e+07	1.86656e+07	1.65355e+07
Q91X97	Neurocalcin-delta [OS=Mus musculus]	Ncald	4.2287e+07	3.69993e+07	4.03612e+07	3.99904e+07	3.28609e+07	3.36672e+07	3.28646e+07	3.87123e+07	5.24243e+07	4.91811e+07	4.62546e+07	4.84479e+07
Q8BJI1	Sodium-dependent neutral amino acid transporter SLC6A17 [OS=Mus musculus]	Slc6a17	2.7019e+07	2.89087e+07	2.62246e+07	2.37863e+07	2.50375e+07	2.74689e+07	2.91918e+07	2.88122e+07	2.88682e+07	2.76984e+07	2.78501e+07	2.69746e+07
Q9QYF9	Protein NDRG3 [OS=Mus musculus]	Ndrg3	2.60471e+07	2.58005e+07	2.43453e+07	2.43229e+07	2.57113e+07	2.60046e+07	2.4314e+07	2.33931e+07	2.73539e+07	2.71596e+07	2.79314e+07	2.89106e+07
Q5DU25	IQ motif and SEC7 domain-containing protein 2 [OS=Mus musculus]	Iqsec2	1.07556e+07	1.10313e+07	1.19198e+07	1.03142e+07	1.09871e+07	7.7686e+06	1.00807e+07	8.19623e+06	9.27722e+06	1.01041e+07	1.0979e+07	1.15185e+07
Q9Z0P4	Paralemmin-1 [OS=Mus musculus]	Palm	8.52745e+07	8.29636e+07	8.57589e+07	7.989e+07	6.02731e+07	8.28957e+07	6.36004e+07	5.5535e+07	8.85167e+07	9.62282e+07	9.21726e+07	9.05054e+07
P70392	Ras-specific guanine nucleotide-releasing factor 2 [OS=Mus musculus]	Rasgrf2	4.87365e+06	4.50078e+06	5.43e+06	5.92557e+06	5.00414e+06	6.20733e+06	1.00125e+07	7.17781e+06	6.51397e+06	5.27813e+06	6.133e+06	5.75476e+06
P09103	Protein disulfide-isomerase [OS=Mus musculus]	P4hb	1.38025e+07	1.59702e+07	1.46625e+07	1.4356e+07	2.0481e+07	2.08657e+07	2.47489e+07	2.06725e+07	1.37618e+07	1.10171e+07	1.46182e+07	1.23896e+07
Q8R570	Synaptosomal-associated protein 47 [OS=Mus musculus]	Snap47	1.26066e+07	1.29191e+07	1.29713e+07	12540688	1.26148e+07	1.2418e+07	1.33426e+07	1.2597e+07	1.46829e+07	1.41993e+07	1.58304e+07	1.52789e+07
Q9DC51	Guanine nucleotide-binding protein G(i) subunit alpha-3 [OS=Mus musculus]	Gnai3	4.49286e+06	5.0587e+06	5.00875e+06	4.61496e+06	5.09671e+06	5.40148e+06	5.13435e+06	5.02568e+06	4.87603e+06	5.10284e+06	4.66426e+06	5.0264e+06
Q63844	Mitogen-activated protein kinase 3 [OS=Mus musculus]	Mapk3	4.89058e+06	4.81777e+06	4.76807e+06	4.35558e+06	5.67378e+06	6.65055e+06	6.03335e+06	6.39656e+06	7.59057e+06	8.70444e+06	8.28848e+06	7.9817e+06
Q8BWF0	Succinate-semialdehyde dehydrogenase, mitochondrial [OS=Mus musculus]	Aldh5a1	4.33932e+07	5.10839e+07	4.55268e+07	4.31052e+07	6.03772e+07	5.16645e+07	4.54129e+07	4.37133e+07	5.36081e+07	4.12491e+07	2.27818e+07	3.10966e+07
Q8CAA7	Glucose 1,6-bisphosphate synthase [OS=Mus musculus]	Pgm2l1	4.30665e+07	4.29972e+07	4.02722e+07	4.52203e+07	3.66755e+07	4.55295e+07	4.10424e+07	4.07446e+07	4.38912e+07	4.42028e+07	4.21818e+07	3.64145e+07
Q68FL4	Putative adenosylhomocysteinase 3 [OS=Mus musculus]	Ahcyl2	9.62782e+06	8.75235e+06	8.3165e+06	8.00897e+06	8.51301e+06	1.1908e+07	9.31394e+06	7.46496e+06	1.15751e+07	1.06649e+07	1.05629e+07	7.80574e+06
Q9D051	Pyruvate dehydrogenase E1 component subunit beta, mitochondrial [OS=Mus musculus]	Pdhb	4.23028e+07	5.08186e+07	4.42996e+07	4.59193e+07	4.9421e+07	3.27701e+07	4.79963e+07	4.47047e+07	3.36181e+07	3.84558e+07	4.79335e+07	3.99591e+07
Q9CWS0	N(G),N(G)-dimethylarginine dimethylaminohydrolase 1 [OS=Mus musculus]	Ddah1	2.99951e+07	2.91592e+07	3.14569e+07	2.99696e+07	2.79399e+07	3.48742e+07	2.95672e+07	2.9938e+07	3.65159e+07	3.88369e+07	3.56828e+07	3.4548e+07
P14152	Malate dehydrogenase, cytoplasmic [OS=Mus musculus]	Mdh1	2.40873e+08	2.44785e+08	2.43338e+08	2.55464e+08	2.4451e+08	2.54586e+08	2.38012e+08	2.44802e+08	2.41565e+08	2.50653e+08	2.5328e+08	2.31359e+08
P63094	Guanine nucleotide-binding protein G(s) subunit alpha isoforms short [OS=Mus musculus]	Gnas	3.37639e+07	3.39069e+07	3.1553e+07	3.41505e+07	3.1044e+07	3.83169e+07	3.57397e+07	3.59899e+07	3.43954e+07	3.34623e+07	2.96375e+07	3.04509e+07
Q8VEM8	Phosphate carrier protein, mitochondrial [OS=Mus musculus]	Slc25a3	7.8965e+07	9.94168e+07	9.666e+07	9.86711e+07	9.84226e+07	6.25746e+07	1.01334e+08	9.49352e+07	7.99509e+07	8.05993e+07	1.02515e+08	9.62634e+07
Q8CHT1	Ephexin-1 [OS=Mus musculus]	Ngef	1.02256e+07	1.06217e+07	9.21438e+06	1.31687e+07	8.87419e+06	8.86967e+06	1.02486e+07	1.04893e+07	1.048e+07	9.30183e+06	1.04027e+07	9.87665e+06
Q99KJ8	Dynactin subunit 2 [OS=Mus musculus]	Dctn2	3.184e+07	2.81764e+07	3.25016e+07	3.18179e+07	3.29611e+07	3.2058e+07	3.27396e+07	2.92687e+07	3.49481e+07	3.35696e+07	3.28314e+07	3.03564e+07
P15209	BDNF/NT-3 growth factors receptor [OS=Mus musculus]	Ntrk2	1.3758e+07	1.35234e+07	1.4451e+07	1.33136e+07	1.18583e+07	1.29624e+07	1.28261e+07	1.13349e+07	1.46299e+07	1.50995e+07	1.3313e+07	1.32197e+07
P55012	Solute carrier family 12 member 2 [OS=Mus musculus]	Slc12a2	4.10117e+07	3.70485e+07	4.10714e+07	3.90711e+07	4.62987e+07	4.74166e+07	4.51681e+07	4.45594e+07	4.26267e+07	3.98786e+07	4.85385e+07	4.15709e+07
Q61838	Pregnancy zone protein [OS=Mus musculus]	Pzp	1.18282e+07	1.46009e+07	1.2318e+07	1.46658e+07	1.78889e+07	1.48843e+07	1.9811e+07	2.23265e+07	7.98931e+06	9.45119e+06	1.1422e+07	8.62634e+06
Q9D1A2	Cytosolic non-specific dipeptidase [OS=Mus musculus]	Cndp2	2.19328e+07	1.86068e+07	2.08158e+07	2.13539e+07	2.35742e+07	2.56715e+07	2.40619e+07	2.35851e+07	2.13995e+07	1.69431e+07	2.02263e+07	1.99343e+07
Q61330	Contactin-2 [OS=Mus musculus]	Cntn2	5.26136e+07	5.39761e+07	5.09958e+07	6.14765e+07	5.98974e+07	5.70134e+07	6.39467e+07	5.92091e+07	4.52068e+07	5.00979e+07	5.85231e+07	4.96907e+07
Q91WD5	NADH dehydrogenase [ubiquinone] iron-sulfur protein 2, mitochondrial [OS=Mus musculus]	Ndufs2	2.33456e+07	2.66584e+07	2.56923e+07	2.57799e+07	2.37616e+07	1.65794e+07	2.47998e+07	2.35457e+07	1.81225e+07	20795659	26153988	2.45096e+07
P16054	Protein kinase C epsilon type [OS=Mus musculus]	Prkce	1.87467e+07	1.9674e+07	1.88069e+07	1.95946e+07	1.63026e+07	1.65696e+07	17973736	1.67257e+07	2.09065e+07	2.24467e+07	2.12348e+07	1.99653e+07
Q9JIA1	Leucine-rich glioma-inactivated protein 1 [OS=Mus musculus]	Lgi1	9.69086e+07	9.44394e+07	9.88472e+07	9.88093e+07	9.80396e+07	1.09441e+08	9.9637e+07	1.02736e+08	9.83653e+07	9.67732e+07	9.07139e+07	8.91744e+07
P60843	Eukaryotic initiation factor 4A-I [OS=Mus musculus]	Eif4a1	4.63134e+06	5.34136e+06	5.15132e+06	6.32568e+06	8.07933e+06	7.75059e+06	9.66286e+06	8.48251e+06	5.04899e+06	4.98724e+06	5.24152e+06	3.67711e+06
Q3UM45	Protein phosphatase 1 regulatory subunit 7 [OS=Mus musculus]	Ppp1r7	1.51314e+07	1.64917e+07	1.49875e+07	1.70927e+07	1.62772e+07	1.77702e+07	1.40528e+07	1.52059e+07	1.7316e+07	1.60982e+07	1.65187e+07	1.85928e+07
Q08460	Calcium-activated potassium channel subunit alpha-1 [OS=Mus musculus]	Kcnma1	2.1766e+07	2.22823e+07	2.21079e+07	2.10267e+07	2.02236e+07	2.21357e+07	2.0996e+07	1.99542e+07	2.17696e+07	2.13321e+07	2.03024e+07	2.14738e+07
Q91YT0	NADH dehydrogenase [ubiquinone] flavoprotein 1, mitochondrial [OS=Mus musculus]	Ndufv1	5.45839e+07	5.10261e+07	4.85974e+07	5.06834e+07	5.08785e+07	45247620	5.19431e+07	4.34166e+07	4.75863e+07	5.25657e+07	5.46115e+07	5.14064e+07
Q60875	Rho guanine nucleotide exchange factor 2 [OS=Mus musculus]	Arhgef2	2.11605e+07	2.17052e+07	2.14567e+07	2.6125e+07	1.98304e+07	1.84085e+07	2.20824e+07	2.05114e+07	1.9729e+07	1.95803e+07	2.51064e+07	2.12507e+07
Q9Z2I9	Succinate--CoA ligase [ADP-forming] subunit beta, mitochondrial [OS=Mus musculus]	Sucla2	3.72156e+07	4.20039e+07	49781650	4.14396e+07	4.03544e+07	3.02575e+07	3.92879e+07	3.49266e+07	3.76424e+07	3.46909e+07	4.31275e+07	3.48384e+07
Q00898	Alpha-1-antitrypsin 1-5 [OS=Mus musculus]	Serpina1e	1.06266e+07	1.12649e+07	1.14821e+07	1.4925e+07	1.18957e+07	7.69513e+06	9.79878e+06	9.55241e+06	3.26014e+06	3.10227e+06	4.49477e+06	3.93485e+06
Q8CJH3	Plexin-B1 [OS=Mus musculus]	Plxnb1	1.17155e+07	1.34221e+07	1.3399e+07	1.17951e+07	1.26788e+07	1.39466e+07	1.48525e+07	1.45706e+07	1.47521e+07	1.48971e+07	1.44699e+07	1.37897e+07
P62137	Serine/threonine-protein phosphatase PP1-alpha catalytic subunit [OS=Mus musculus]	Ppp1ca	3.02003e+06	2.74933e+06	2.58899e+06	2.67736e+06	2.38462e+06	1.87839e+06	1967155	2.76692e+06	2.75346e+06	2.72902e+06	2.72076e+06	3.79909e+06
P18760	Cofilin-1 [OS=Mus musculus]	Cfl1	1.56186e+08	1.4965e+08	1.67335e+08	160217016	1.5198e+08	1.51132e+08	1.64737e+08	1.63266e+08	1.93883e+08	1.5204e+08	1.86531e+08	1.79517e+08
O08709	Peroxiredoxin-6 [OS=Mus musculus]	Prdx6	3.91541e+07	3.81837e+07	4.02055e+07	3.91184e+07	3.74556e+07	4.8755e+07	3.969e+07	4.90607e+07	5.36672e+07	5.01178e+07	5.73973e+07	5.52086e+07
P00920	Carbonic anhydrase 2 [OS=Mus musculus]	Ca2	5.79054e+07	6.61668e+07	6.58522e+07	7.14697e+07	9.45766e+07	6.52097e+07	7.7453e+07	7.04793e+07	5.59622e+07	6.38806e+07	6.49092e+07	6.72129e+07
A2AN08	E3 ubiquitin-protein ligase UBR4 [OS=Mus musculus]	Ubr4	2.25275e+06	2.36716e+06	2.31399e+06	2.74206e+06	2.86989e+06	2.05641e+06	2.06981e+06	2.7064e+06	2803967	3.05161e+06	2.28611e+06	2.91398e+06
P97807	Fumarate hydratase, mitochondrial [OS=Mus musculus]	Fh	2.74263e+07	3.22427e+07	2.75796e+07	3.25608e+07	2.88478e+07	1.96601e+07	2.84628e+07	2.7034e+07	2.35295e+07	2.35192e+07	3.24598e+07	3.08674e+07
Q9CZC8	Secernin-1 [OS=Mus musculus]	Scrn1	2.20061e+07	2.11813e+07	2.02435e+07	2.09479e+07	2.03175e+07	2.42131e+07	2.0351e+07	1.938e+07	2.14302e+07	1.97801e+07	1.88872e+07	1.76708e+07
P70404	Isocitrate dehydrogenase [NAD] subunit gamma 1, mitochondrial [OS=Mus musculus]	Idh3g	4.52782e+07	5.10377e+07	4.68454e+07	5.20482e+07	4.5571e+07	4.06117e+07	4.79213e+07	5.01788e+07	4.46116e+07	4.53077e+07	4.90999e+07	4.7945e+07
P20917	Myelin-associated glycoprotein [OS=Mus musculus]	Mag	4.34004e+07	3.0828e+07	3.94145e+07	4.20823e+07	5.79886e+07	3.37391e+07	4.1441e+07	3.58981e+07	2.72171e+07	3.53189e+07	3.55581e+07	3.40566e+07
Q80UG5	Septin-9 [OS=Mus musculus]	Septin9	2.17351e+07	2.12399e+07	2.33034e+07	2.14419e+07	2.0925e+07	2.47763e+07	2.19603e+07	2.03935e+07	3.16787e+07	2.45425e+07	2.85373e+07	2.34035e+07
Q8BX70	Intermembrane lipid transfer protein VPS13C [OS=Mus musculus]	Vps13c	5.8068e+06	5.13938e+06	5.30938e+06	4.64731e+06	5.35935e+06	4.7036e+06	5.12007e+06	5.84818e+06	4.90925e+06	6.03884e+06	6.44423e+06	6.09481e+06
Q8R5M8	Cell adhesion molecule 1 [OS=Mus musculus]	Cadm1	3.36877e+07	3.11274e+07	3.39298e+07	2.70674e+07	3.31964e+07	3.52538e+07	2.85828e+07	3.0277e+07	5.20008e+07	4.90296e+07	4.23296e+07	4.71417e+07
P51150	Ras-related protein Rab-7a [OS=Mus musculus]	Rab7a	5.82352e+07	5.81587e+07	5.48064e+07	5.53937e+07	6.13339e+07	62359274	6.64236e+07	6.13907e+07	6.07038e+07	6.03021e+07	5.62688e+07	6.13284e+07
Q91V61	Sideroflexin-3 [OS=Mus musculus]	Sfxn3	3.59423e+07	4.56315e+07	3.99046e+07	4.1774e+07	4.19494e+07	3.19974e+07	4.04497e+07	4.18481e+07	3.37951e+07	3.48189e+07	4.27127e+07	4.37701e+07
Q7TT50	Serine/threonine-protein kinase MRCK beta [OS=Mus musculus]	Cdc42bpb	1.41606e+07	1.38394e+07	1.30938e+07	1.24268e+07	1.43101e+07	1.57748e+07	1.435e+07	1.15136e+07	1.52576e+07	1.64832e+07	1.304e+07	1.31009e+07
P70414	Sodium/calcium exchanger 1 [OS=Mus musculus]	Slc8a1	2.60216e+07	2.90282e+07	2.65826e+07	2.75318e+07	2.62336e+07	2.60726e+07	2.34767e+07	2.52428e+07	3.88813e+07	3.58852e+07	3.26004e+07	3.24108e+07
Q61490	CD166 antigen [OS=Mus musculus]	Alcam	3.08913e+07	2.8829e+07	3.0113e+07	3.01136e+07	2.92202e+07	2.80675e+07	2.85816e+07	3.20453e+07	3.87555e+07	4.17748e+07	3.50267e+07	3.74592e+07
Q60634	Flotillin-2 [OS=Mus musculus]	Flot2	5.64924e+07	5.68643e+07	5.98007e+07	5.85093e+07	5.51592e+07	6.40198e+07	5.5604e+07	5.83946e+07	6.48292e+07	6.29025e+07	6.48685e+07	6.48233e+07
P47757	F-actin-capping protein subunit beta [OS=Mus musculus]	Capzb	1.61512e+08	1.62167e+08	1.59072e+08	1.58089e+08	142411914	1.65363e+08	1.6935e+08	1.48582e+08	1.7264e+08	1.65131e+08	1.62321e+08	1.44764e+08
P70207	Plexin-A2 [OS=Mus musculus]	Plxna2	4.53898e+06	4.55256e+06	4.95274e+06	4.92298e+06	4.68659e+06	5.36251e+06	4.68783e+06	4.92793e+06	5.21741e+06	4.53272e+06	4.1782e+06	4.89156e+06
Q9EQZ6	Rap guanine nucleotide exchange factor 4 [OS=Mus musculus]	Rapgef4	8.3344e+06	8.47131e+06	9.26429e+06	8.64039e+06	6.57612e+06	6.57919e+06	8.15323e+06	6.8485e+06	8.2161e+06	8.25413e+06	8.88963e+06	8.99413e+06
Q9CPY7	Cytosol aminopeptidase [OS=Mus musculus]	Lap3	8.18871e+06	8.56912e+06	8.46745e+06	8.45944e+06	1.13052e+07	9.6274e+06	1.05916e+07	1.05185e+07	9.14261e+06	1.05701e+07	1.00835e+07	9.68732e+06
Q02357	Ankyrin-1 [OS=Mus musculus]	Ank1	3.0843e+06	3.36091e+06	4.76123e+06	4.97982e+06	3.2473e+06	2.66824e+06	4.0068e+06	5.10408e+06	1.92327e+06	1.94949e+06	1.60616e+06	1.73851e+06
O08529	Calpain-2 catalytic subunit [OS=Mus musculus]	Capn2	8.15551e+06	8.86644e+06	1.01343e+07	7.53227e+06	9.26082e+06	8.14247e+06	1.00026e+07	8.96529e+06	1.12882e+07	7.71182e+06	1.07002e+07	9.41997e+06
P13707	Glycerol-3-phosphate dehydrogenase [NAD(+)], cytoplasmic [OS=Mus musculus]	Gpd1	1.64618e+07	1.65994e+07	1.40662e+07	1.65787e+07	2.06679e+07	2.12707e+07	2.18253e+07	2.08888e+07	1.39531e+07	1.30693e+07	1.1601e+07	1.25974e+07
P61205	ADP-ribosylation factor 3 [OS=Mus musculus]	Arf3	4.0418e+08	417349384	398249895	4.52851e+08	4.37975e+08	4.56059e+08	3.95265e+08	4.46891e+08	4.45486e+08	4.37707e+08	4.50041e+08	3.80069e+08
Q9JKK7	Tropomodulin-2 [OS=Mus musculus]	Tmod2	2.31978e+07	2.48872e+07	2.3875e+07	2.2125e+07	2.31839e+07	2.47933e+07	20917096	2.36443e+07	2.40333e+07	2.76298e+07	2.50318e+07	2.42744e+07
Q61696	Heat shock 70 kDa protein 1A [OS=Mus musculus]	Hspa1a	6.3353e+06	6.91207e+06	5.74557e+06	7.19394e+06	6.60111e+06	6.70816e+06	6.79794e+06	7.39961e+06	4.59925e+06	6.29829e+06	6.47444e+06	7.147e+06
P84078	ADP-ribosylation factor 1 [OS=Mus musculus]	Arf1		39699.3	31904.6	22757.4			27283.5		98490.9			115797
P30999	Catenin delta-1 [OS=Mus musculus]	Ctnnd1	2.03193e+07	2.00534e+07	1.81918e+07	2.32853e+07	2.26405e+07	1.57548e+07	2.06626e+07	2.98805e+07	2.43993e+07	2.05121e+07	1.91244e+07	2.39056e+07
Q9R0Y5	Adenylate kinase isoenzyme 1 [OS=Mus musculus]	Ak1	2.51698e+07	2.70492e+07	2.91724e+07	2.71223e+07	2.94714e+07	2.91545e+07	3.08984e+07	3.2478e+07	2.80827e+07	2.7274e+07	2.63433e+07	2.59373e+07
O54829	Regulator of G-protein signaling 7 [OS=Mus musculus]	Rgs7	3.89504e+07	3.59056e+07	3.57387e+07	3.63816e+07	3.53615e+07	3.75945e+07	3.73066e+07	3.90292e+07	3.85327e+07	3.67009e+07	3.34288e+07	3.71219e+07
Q9JLB0	Protein PALS2 [OS=Mus musculus]	Pals2	1.72227e+07	1.4079e+07	1.37562e+07	1.23553e+07	1.30822e+07	1.56943e+07	1.28956e+07	1.32904e+07	1.53361e+07	1.53487e+07	1.44232e+07	1.54878e+07
P47754	F-actin-capping protein subunit alpha-2 [OS=Mus musculus]	Capza2	4.09551e+07	4.56004e+07	4.08404e+07	4.02631e+07	4.20182e+07	4.03076e+07	3.98852e+07	4.42894e+07	4.33924e+07	4.70442e+07	5.00871e+07	4.63207e+07
Q91V41	Ras-related protein Rab-14 [OS=Mus musculus]	Rab14	5.873e+07	6.19919e+07	6.12247e+07	5.99402e+07	6.53367e+07	5.69114e+07	6.12937e+07	6.33158e+07	6.27907e+07	5.51121e+07	6.14935e+07	6.39345e+07
Q00493	Carboxypeptidase E [OS=Mus musculus]	Cpe	1.31287e+07	1.50209e+07	1.33861e+07	1.1103e+07	1.23132e+07	1.56056e+07	1.57299e+07	1.40906e+07	1.68571e+07	1.68069e+07	1.88421e+07	1.40985e+07
Q8CGF6	WD repeat-containing protein 47 [OS=Mus musculus]	Wdr47	9.53349e+06	8.77507e+06	9.92885e+06	7.97555e+06	8.61566e+06	1.0705e+07	9.64013e+06	8.01099e+06	1.34427e+07	1.19399e+07	1.15557e+07	1.14841e+07
Q6NZL0	Protein SOGA3 [OS=Mus musculus]	Soga3	6.10531e+07	6.52336e+07	6.53926e+07	5.93526e+07	6.4513e+07	6.63198e+07	6.67715e+07	5.73017e+07	7.44492e+07	6.17059e+07	6.32419e+07	5.96196e+07
P61161	Actin-related protein 2 [OS=Mus musculus]	Actr2	3.76099e+07	4.51104e+07	3.94529e+07	3.87161e+07	3.80975e+07	4.33212e+07	4.17083e+07	4.34896e+07	4.2902e+07	4.58147e+07	4.71808e+07	4.53662e+07
Q8QZT1	Acetyl-CoA acetyltransferase, mitochondrial [OS=Mus musculus]	Acat1	3.76471e+07	4.53415e+07	3.97647e+07	3.88528e+07	3.64453e+07	2.65872e+07	3.61713e+07	3.4499e+07	3.5561e+07	3.82215e+07	4.03495e+07	4.0928e+07
Q8BYR5	Calcium-dependent secretion activator 2 [OS=Mus musculus]	Cadps2	5.43239e+06	5.00694e+06	5.35799e+06	6.39646e+06	5.83268e+06	5569369	5.7545e+06	6.12584e+06	4.33946e+06	5.25915e+06	4.602e+06	4.49793e+06
P48320	Glutamate decarboxylase 2 [OS=Mus musculus]	Gad2	1.87104e+07	2.13718e+07	2.11903e+07	2.06883e+07	2.78272e+07	2.17069e+07	2.02164e+07	2.68518e+07	2.22968e+07	1.82757e+07	2.10835e+07	2.13747e+07
P13020	Gelsolin [OS=Mus musculus]	Gsn	2.83611e+07	3.26349e+07	2.98295e+07	3.07413e+07	3.76379e+07	3.12968e+07	3.23444e+07	3.33463e+07	2.75506e+07	2.4376e+07	3.02323e+07	2.70272e+07
P63005	Platelet-activating factor acetylhydrolase IB subunit beta [OS=Mus musculus]	Pafah1b1	3.33793e+07	3.14674e+07	3.20432e+07	3.26283e+07	3.40325e+07	3.54005e+07	3.67148e+07	3.38016e+07	3.17537e+07	3.59531e+07	3.52706e+07	3.04122e+07
Q6NS60	F-box only protein 41 [OS=Mus musculus]	Fbxo41	1.64979e+07	1.2553e+07	1.42615e+07	1.37813e+07	1.37067e+07	1.29021e+07	1.52713e+07	1.58388e+07	1.45088e+07	1.42891e+07	1.52337e+07	1.57716e+07
Q99J85	Neuronal pentraxin receptor [OS=Mus musculus]	Nptxr	7.91586e+06	7.00489e+06	7.6584e+06	6.57157e+06	5.29429e+06	6.80193e+06	6.76469e+06	6.22605e+06	1.07262e+07	1.0261e+07	1.40753e+07	1.12398e+07
Q9D394	Protein RUFY3 [OS=Mus musculus]	Rufy3	1.88371e+07	1.92218e+07	1.80794e+07	1.89735e+07	20145095	2.03204e+07	1.96793e+07	1.98694e+07	2.11634e+07	2.0729e+07	2.10993e+07	1.83006e+07
P07759	Serine protease inhibitor A3K [OS=Mus musculus]	Serpina3k	3.82886e+07	4.20598e+07	3.59575e+07	5.45431e+07	4.29306e+07	3.32458e+07	3.93869e+07	3.5839e+07	1.42366e+06	1.71792e+06	1.50264e+06	1.44514e+06
Q9CR62	Mitochondrial 2-oxoglutarate/malate carrier protein [OS=Mus musculus]	Slc25a11	2.34609e+07	2.64072e+07	2.6602e+07	2.94616e+07	2.6664e+07	1.72273e+07	2.64736e+07	3.11923e+07	2.40148e+07	2.14049e+07	3.13251e+07	2.75676e+07
P28740	Kinesin-like protein KIF2A [OS=Mus musculus]	Kif2a	2.04206e+07	2.10495e+07	2.12256e+07	1.96027e+07	2.06274e+07	1.93469e+07	2.02268e+07	1.96659e+07	2.23176e+07	2.2454e+07	2.39068e+07	2.09946e+07
Q9CQQ7	ATP synthase F(0) complex subunit B1, mitochondrial [OS=Mus musculus]	Atp5pb	5.13075e+07	5.53264e+07	5.46763e+07	5.63338e+07	5.19602e+07	3.69648e+07	5.28921e+07	5.09118e+07	4.66064e+07	4.79297e+07	5.20126e+07	4.78129e+07
P53994	Ras-related protein Rab-2A [OS=Mus musculus]	Rab2a	5.9444e+07	6.6433e+07	6.37668e+07	6.19006e+07	6.2278e+07	6.60801e+07	5.87936e+07	61013282	6.49772e+07	6.4218e+07	70544946	7.05797e+07
Q80T41	Gamma-aminobutyric acid type B receptor subunit 2 [OS=Mus musculus]	Gabbr2	1.87079e+07	1.84781e+07	2.37809e+07	1.82662e+07	2.43523e+07	2.27314e+07	1.86198e+07	1.99138e+07	1.843e+07	1.77735e+07	1.81095e+07	1.81998e+07
P51881	ADP/ATP translocase 2 [OS=Mus musculus]	Slc25a5	9.98902e+07	1.00607e+08	9.87034e+07	1.07032e+08	1.01462e+08	7.90339e+07	9.77767e+07	8.60555e+07	7.17148e+07	7.74067e+07	1.00657e+08	8.06738e+07
Q8BMF4	Dihydrolipoyllysine-residue acetyltransferase component of pyruvate dehydrogenase complex, mitochondrial [OS=Mus musculus]	Dlat	4.87223e+07	5.66969e+07	4.99427e+07	5.14731e+07	5.28158e+07	3.74897e+07	5.01486e+07	4.50694e+07	4.38159e+07	4.72568e+07	5.59062e+07	5.06325e+07
Q61481	Dual specificity calcium/calmodulin-dependent 3',5'-cyclic nucleotide phosphodiesterase 1A [OS=Mus musculus]	Pde1a	5.35145e+06	5.69206e+06	6.23399e+06	7.72755e+06	6.26502e+06	7.57062e+06	7.106e+06	7.76706e+06	8.84814e+06	7.53389e+06	8.33569e+06	8.02702e+06
Q9QZF2	Glypican-1 [OS=Mus musculus]	Gpc1	8.2637e+06	8.18378e+06	6.76684e+06	5.85971e+06	7.46211e+06	1.11818e+07	7.94507e+06	5.1737e+06	6.24438e+06	9.35446e+06	1.64815e+07	6.15713e+06
P84075	Neuron-specific calcium-binding protein hippocalcin [OS=Mus musculus]	Hpca	1.04618e+08	1.00437e+08	8.37699e+07	7.75116e+07	8.22683e+07	9.62808e+07	8.10506e+07	7.89602e+07	8.41945e+07	8.50153e+07	8.72813e+07	8.42048e+07
F8VPU2	FERM, ARHGEF and pleckstrin domain-containing protein 1 [OS=Mus musculus]	Farp1	1.218e+07	1.17169e+07	1.15565e+07	1.02794e+07	1.08229e+07	1.27119e+07	1.11469e+07	1.12438e+07	1.53135e+07	1.4353e+07	1.36173e+07	1.43461e+07
Q9WV55	Vesicle-associated membrane protein-associated protein A [OS=Mus musculus]	Vapa	3.39549e+07	3.43396e+07	3.39026e+07	3.51799e+07	3.39023e+07	3.79659e+07	3.59983e+07	3.6761e+07	3.44317e+07	3.2029e+07	3.68042e+07	3.54482e+07
Q6P1F6	Serine/threonine-protein phosphatase 2A 55 kDa regulatory subunit B alpha isoform [OS=Mus musculus]	Ppp2r2a	1.91179e+07	1.96121e+07	2.05435e+07	2.05073e+07	1.93764e+07	2.00763e+07	1.97005e+07	2.08964e+07	1.92358e+07	1.97935e+07	2.13537e+07	2.10534e+07
Q9EP69	Phosphatidylinositol-3-phosphatase SAC1 [OS=Mus musculus]	Sacm1l	2.78831e+07	2.61334e+07	2.8134e+07	2.58346e+07	2.52997e+07	2.9285e+07	2.75088e+07	2.67254e+07	2.32099e+07	2.1972e+07	2.39715e+07	2.46927e+07
P63011	Ras-related protein Rab-3A [OS=Mus musculus]	Rab3a	2.47586e+08	2.50397e+08	2.41694e+08	247686459	2.38669e+08	2.39399e+08	2.39031e+08	2.29226e+08	2.24551e+08	2.29428e+08	2.32113e+08	230515992
Q9DCX2	ATP synthase subunit d, mitochondrial [OS=Mus musculus]	Atp5pd	4.31515e+07	5.1407e+07	5.10008e+07	5.40141e+07	4.48583e+07	3.01357e+07	4.31018e+07	4.19173e+07	4.03603e+07	4.19407e+07	4.95146e+07	4.9302e+07
P70232	Neural cell adhesion molecule L1-like protein [OS=Mus musculus]	Chl1	2.34717e+07	1.29093e+07	2.37132e+07	1.14215e+07	6.43615e+06	2.0162e+07	7.86321e+06	8.9788e+06	3.30905e+07	1.58603e+07	2.78533e+07	1.31214e+07
Q61290	Voltage-dependent R-type calcium channel subunit alpha-1E [OS=Mus musculus]	Cacna1e	8.25658e+06	7.97027e+06	7.52892e+06	9.04096e+06	6.42688e+06	6.90509e+06	7.12016e+06	6.19694e+06	8.31881e+06	9.13348e+06	9.74213e+06	7.30001e+06
P70296	Phosphatidylethanolamine-binding protein 1 [OS=Mus musculus]	Pebp1	8.92897e+07	9.44239e+07	8.46319e+07	8.61064e+07	8.45189e+07	9.73114e+07	8.60427e+07	9.38382e+07	9.17195e+07	9.50437e+07	1.01286e+08	1.12313e+08
P39054	Dynamin-2 [OS=Mus musculus]	Dnm2	1.05792e+06	1.0673e+06	1.0048e+06	1.05971e+06	1.49161e+06	1.22632e+06	1841249	1.55563e+06	1.35272e+06	1.39902e+06	1.53075e+06	1.04741e+06
Q61151	Serine/threonine-protein phosphatase 2A 56 kDa regulatory subunit epsilon isoform [OS=Mus musculus]	Ppp2r5e	1.275e+07	1.45557e+07	1.27073e+07	1.37203e+07	1.19822e+07	1.33362e+07	1.26072e+07	1.27749e+07	1.27669e+07	1.33116e+07	1.35121e+07	1.32839e+07
O35678	Monoglyceride lipase [OS=Mus musculus]	Mgll	2.17402e+07	2.07127e+07	2.05568e+07	2.22251e+07	2.12687e+07	1.98266e+07	2.08103e+07	2.3933e+07	1.51201e+07	1.62644e+07	1.82105e+07	1.99178e+07
P24527	Leukotriene A-4 hydrolase [OS=Mus musculus]	Lta4h	2.21255e+07	2.12415e+07	2.43199e+07	2.47669e+07	2.58839e+07	2.31351e+07	2.43404e+07	1.94908e+07	2.10443e+07	2.16285e+07	2.01795e+07	1.84104e+07
Q3UYC0	Protein phosphatase 1H [OS=Mus musculus]	Ppm1h	1.72521e+07	1.36253e+07	1.62554e+07	1.67085e+07	1.489e+07	1.29367e+07	1.78526e+07	1.79296e+07	1.40925e+07	1.20675e+07	1.37274e+07	1.38506e+07
P26039	Talin-1 [OS=Mus musculus]	Tln1	1.31346e+06	1.53146e+06	837781	1.18424e+06	2.24478e+06	2.28177e+06	2.57195e+06	3.13803e+06	995641	1.21897e+06	1.05625e+06	1.05514e+06
P57746	V-type proton ATPase subunit D [OS=Mus musculus]	Atp6v1d	4.35784e+07	4.94799e+07	4.5842e+07	5.20063e+07	4.72615e+07	5.19489e+07	4.4909e+07	5.20406e+07	5.09378e+07	4.21121e+07	4.83668e+07	49646750
P35585	AP-1 complex subunit mu-1 [OS=Mus musculus]	Ap1m1	1.13378e+07	1.20645e+07	1.27511e+07	1.31981e+07	1.48362e+07	1.34544e+07	1.36835e+07	1.53839e+07	1.32705e+07	1.41718e+07	1.28379e+07	1.27944e+07
P62748	Hippocalcin-like protein 1 [OS=Mus musculus]	Hpcal1	5.74364e+06	6.49115e+06	6.5641e+06	4.46572e+06	4.88026e+06	5.85034e+06	5.06598e+06	3.6786e+06	1.18629e+07	1.45969e+07	1.45741e+07	1.14208e+07
P62715	Serine/threonine-protein phosphatase 2A catalytic subunit beta isoform [OS=Mus musculus]	Ppp2cb	3.84224e+07	4.1962e+07	3.55925e+07	3.96088e+07	3.85206e+07	4.12243e+07	4.04474e+07	3.63099e+07	4.40213e+07	4.15262e+07	4.52843e+07	4.10271e+07
Q99JP7	Glutathione hydrolase 7 [OS=Mus musculus]	Ggt7	8.75436e+06	7.79466e+06	8.17651e+06	9.07363e+06	8.44866e+06	8.28907e+06	7.99149e+06	9.61839e+06	8.81075e+06	8.02922e+06	7.8056e+06	8.10042e+06
P06801	NADP-dependent malic enzyme [OS=Mus musculus]	Me1	1.34595e+07	5.75475e+06	1.10166e+07	5.27838e+06	1.54461e+07	5.14862e+06	1.57979e+07	5.16979e+06	1.42939e+07	5.50094e+06	1.4762e+07	6.05588e+06
Q8BYM5	Neuroligin-3 [OS=Mus musculus]	Nlgn3	3.75793e+07	3.09345e+07	3.2412e+07	3.89121e+07	3.91675e+07	3.11015e+07	3.40607e+07	3.70829e+07	4.38205e+07	3.58033e+07	4.18238e+07	3.82718e+07
P05132	cAMP-dependent protein kinase catalytic subunit alpha [OS=Mus musculus]	Prkaca	9.20312e+06	7.96328e+06	9.85411e+06	8.32086e+06	8.15481e+06	9.29926e+06	8.40192e+06	8.95672e+06	1.08482e+07	1.11501e+07	1.01374e+07	9.4695e+06
P61750	ADP-ribosylation factor 4 [OS=Mus musculus]	Arf4	3.39495e+06	3.99045e+06	3.67235e+06	3.63375e+06	4.43511e+06	4.6222e+06	4.5862e+06	4.37767e+06	3.96737e+06	4.20983e+06	3.49808e+06	3.46097e+06
P43406	Integrin alpha-V [OS=Mus musculus]	Itgav	6.74242e+06	7.85462e+06	5.5667e+06	6.21976e+06	6.95763e+06	8.9687e+06	9.46048e+06	7.97792e+06	7.55399e+06	6.45239e+06	6.98091e+06	6.93387e+06
Q60737	Casein kinase II subunit alpha [OS=Mus musculus]	Csnk2a1	1.19052e+08	1.11325e+08	9.80641e+07	1.00857e+08	1.06354e+08	1.27104e+08	128872223	9.71959e+07	1.0294e+08	1.17705e+08	1.00675e+08	8.05098e+07
Q99K51	Plastin-3 [OS=Mus musculus]	Pls3	9.93949e+06	1.08537e+07	1.10065e+07	9.82315e+06	1.09429e+07	1.09703e+07	1.11649e+07	1.21996e+07	1.15718e+07	1.20479e+07	1.21195e+07	9.75069e+06
P37040	NADPH--cytochrome P450 reductase [OS=Mus musculus]	Por	1.11522e+07	9.6795e+06	1.18897e+07	1.15507e+07	1.17409e+07	1.11966e+07	1.23619e+07	1.0719e+07	1.12499e+07	1.1149e+07	9.57216e+06	9.79131e+06
Q3UHK6	Teneurin-4 [OS=Mus musculus]	Tenm4	7.24979e+06	7.25928e+06	7.73401e+06	6.62919e+06	7.47384e+06	8.42752e+06	8.72078e+06	8.01154e+06	8.34793e+06	6.68704e+06	7.4451e+06	8.03658e+06
P0DP27	Calmodulin-2 [OS=Mus musculus]	Calm2	2.61584e+08	2.42639e+08	1.9391e+08	2.57877e+08	2.79162e+08	2.56504e+08	2.10513e+08	1.76715e+08	1.55484e+08	1.8315e+08	1.2835e+08	2.05051e+08
P15116	Cadherin-2 [OS=Mus musculus]	Cdh2	1.72596e+07	1.89587e+07	1.68263e+07	1.55518e+07	1.59177e+07	1.54393e+07	1.49496e+07	1.73177e+07	2.0492e+07	2.09066e+07	2.33448e+07	2.27168e+07
P63330	Serine/threonine-protein phosphatase 2A catalytic subunit alpha isoform [OS=Mus musculus]	Ppp2ca	1.80812e+06	1.81951e+06	1.74102e+06	1.61222e+06	1.91832e+06	1.81156e+06	2.10698e+06	1.52896e+06	1.8472e+06	2.10643e+06	1.79594e+06	1.98011e+06
Q9CVB6	Actin-related protein 2/3 complex subunit 2 [OS=Mus musculus]	Arpc2	4.43163e+07	4.69299e+07	4.44526e+07	4.15478e+07	4.42101e+07	4.83593e+07	4.47563e+07	4.60747e+07	4.7649e+07	5.09824e+07	5.21201e+07	5.17113e+07
Q9Z2H2	Regulator of G-protein signaling 6 [OS=Mus musculus]	Rgs6	1.12303e+07	9.12656e+06	1.0415e+07	1.26493e+07	1.02695e+07	1.05545e+07	1.12431e+07	1.46785e+07	7.43765e+06	7.05334e+06	7.71168e+06	9.08646e+06
Q8CI71	Syndetin [OS=Mus musculus]	Vps50	7.22581e+06	7.31157e+06	6.40215e+06	7.46345e+06	7.81995e+06	7.08547e+06	7.44424e+06	6.64101e+06	7.21296e+06	6.57852e+06	7.41781e+06	6.35726e+06
Q9D0M3	Cytochrome c1, heme protein, mitochondrial [OS=Mus musculus]	Cyc1	2.66927e+07	2.64011e+07	2.79191e+07	2.67964e+07	2.74428e+07	1.86169e+07	2.805e+07	2.44267e+07	2.08545e+07	2.3714e+07	3.06888e+07	2.90577e+07
P27601	Guanine nucleotide-binding protein subunit alpha-13 [OS=Mus musculus]	Gna13	1.46096e+07	1.57535e+07	1.54425e+07	1.42126e+07	1.61259e+07	1.76052e+07	1.6418e+07	1.7626e+07	1.77995e+07	1.97004e+07	1.64711e+07	1.95849e+07
P05480	Proto-oncogene tyrosine-protein kinase Src [OS=Mus musculus]	Src	1.88924e+07	1.7982e+07	1.77413e+07	1.61165e+07	1.65114e+07	1.71219e+07	1.63096e+07	1.72557e+07	1.86233e+07	1.92581e+07	1.8636e+07	1.8881e+07
Q921M7	CYFIP-related Rac1 interactor B [OS=Mus musculus]	Cyrib	3.67146e+07	3.71967e+07	3.408e+07	3.64733e+07	4.09574e+07	3.92128e+07	3.85134e+07	4.01497e+07	4.14001e+07	3.86164e+07	3.68459e+07	3.22669e+07
P19221	Prothrombin [OS=Mus musculus]	F2	2.93294e+07	3.15243e+07	2.71049e+07	2.89464e+07	3.26912e+07	3.43471e+07	3.23532e+07	3.90757e+07	2.74018e+07	2.64737e+07	2.45333e+07	2.71971e+07
Q9WV18	Gamma-aminobutyric acid type B receptor subunit 1 [OS=Mus musculus]	Gabbr1	1.36514e+07	1.19657e+07	1.30113e+07	1.32508e+07	1.21883e+07	1.31904e+07	1.25882e+07	1.44515e+07	1.21271e+07	1.49916e+07	1.32828e+07	1.3645e+07
Q9QYB5	Gamma-adducin [OS=Mus musculus]	Add3	2.5972e+07	2.62276e+07	2.74428e+07	2.76056e+07	2.55487e+07	2.56517e+07	2.54404e+07	2.56032e+07	2.8368e+07	2.96789e+07	2.91483e+07	2.91978e+07
Q80TS3	Adhesion G protein-coupled receptor L3 [OS=Mus musculus]	Adgrl3	6.62963e+06	6.1977e+06	6.53359e+06	6.27311e+06	6.89022e+06	7.24026e+06	7.25806e+06	5.60806e+06	7.75898e+06	7.09264e+06	6.80053e+06	6.62309e+06
Q9D1T0	Leucine-rich repeat and immunoglobulin-like domain-containing nogo receptor-interacting protein 1 [OS=Mus musculus]	Lingo1	3.69361e+07	3.76367e+07	3.31012e+07	3.09174e+07	2.95611e+07	2.98249e+07	3.07321e+07	2.89906e+07	3.34357e+07	3.40231e+07	3.27891e+07	3.17432e+07
P60335	Poly(rC)-binding protein 1 [OS=Mus musculus]	Pcbp1	2.24921e+07	2.59019e+07	2.15672e+07	2.9063e+07	2.69446e+07	2.52244e+07	2.70332e+07	2.67566e+07	2.46262e+07	2.53405e+07	2.53715e+07	2.4103e+07
Q9JM52	Misshapen-like kinase 1 [OS=Mus musculus]	Mink1	2.77524e+07	2.55283e+07	2.59353e+07	1.92275e+07	2.80791e+07	2.76903e+07	2.77723e+07	2.30135e+07	2.95553e+07	2.71045e+07	2.96656e+07	2.47759e+07
P39688	Tyrosine-protein kinase Fyn [OS=Mus musculus]	Fyn	1.5209e+07	1.39246e+07	1.37813e+07	1.33644e+07	1.32206e+07	1.46366e+07	1.37492e+07	1.51695e+07	1.82169e+07	1.87949e+07	1.6727e+07	1.74078e+07
P26231	Catenin alpha-1 [OS=Mus musculus]	Ctnna1	3.97559e+06	2.78997e+06	2.95418e+06	3.38375e+06	4.22733e+06	4.01305e+06	4.12877e+06	4.15454e+06	4.18691e+06	3.84299e+06	3.83786e+06	3.72749e+06
Q80VP0	Tectonin beta-propeller repeat-containing protein 1 [OS=Mus musculus]	Tecpr1	6.46717e+06	5.96527e+06	6.32187e+06	6.00622e+06	5.90141e+06	7.20994e+06	6.68494e+06	5.50543e+06	5.80595e+06	5.21638e+06	5.58502e+06	5.7685e+06
Q5RJI5	Serine/threonine-protein kinase BRSK1 [OS=Mus musculus]	Brsk1	1.26636e+07	1.24447e+07	1.20875e+07	1.22786e+07	1.27522e+07	1.10759e+07	1.24663e+07	1.09946e+07	1.45772e+07	1.30056e+07	1.29086e+07	1.35346e+07
O35633	Vesicular inhibitory amino acid transporter [OS=Mus musculus]	Slc32a1	2.19189e+07	2.44781e+07	24079523	2.36549e+07	2.10131e+07	2.40427e+07	2.22858e+07	2.45445e+07	2.61436e+07	2.53868e+07	2.90326e+07	2.22191e+07
O35874	Neutral amino acid transporter A [OS=Mus musculus]	Slc1a4	1.81102e+07	1.80039e+07	17560869	1.59967e+07	1.97274e+07	2.32965e+07	1.98764e+07	1.97958e+07	2.29788e+07	2.08338e+07	2.17155e+07	1.84962e+07
Q9QZM0	Ubiquilin-2 [OS=Mus musculus]	Ubqln2	5.54468e+06	6.42311e+06	5.57837e+06	4.86545e+06	6.91685e+06	8.6217e+06	5.29444e+06	4.86038e+06	9.88778e+06	8.75189e+06	8.49556e+06	8.11688e+06
P35235	Tyrosine-protein phosphatase non-receptor type 11 [OS=Mus musculus]	Ptpn11	6.58484e+06	7.10192e+06	7.65842e+06	6.9356e+06	6.52211e+06	5.84906e+06	6.46874e+06	7.79206e+06	7.5023e+06	8.07111e+06	8.13306e+06	9.64031e+06
Q8BMS1	Trifunctional enzyme subunit alpha, mitochondrial [OS=Mus musculus]	Hadha	4.4051e+06	4.51371e+06	4.13124e+06	4.49305e+06	4.05547e+06	2.62934e+06	4.45852e+06	4.6647e+06	3.45367e+06	4.45624e+06	4.85191e+06	4.90756e+06
Q8R3V5	Endophilin-B2 [OS=Mus musculus]	Sh3glb2	2.63365e+07	2.51528e+07	2.48423e+07	2.76305e+07	2.41434e+07	2.35446e+07	24645920	2.69129e+07	2.40788e+07	2.46633e+07	2.64448e+07	2.60328e+07
Q9R1V7	Disintegrin and metalloproteinase domain-containing protein 23 [OS=Mus musculus]	Adam23	1.7104e+07	1.39907e+07	1.59854e+07	1.57429e+07	1.71316e+07	1.90078e+07	1.58072e+07	1.54731e+07	1.4111e+07	1.3953e+07	1.1812e+07	1.43915e+07
P51660	Peroxisomal multifunctional enzyme type 2 [OS=Mus musculus]	Hsd17b4	1.16319e+07	1.09915e+07	1.01377e+07	1.21021e+07	1.34001e+07	2.04456e+07	1.53876e+07	1.23526e+07	1.19228e+07	1.08323e+07	1.10312e+07	9.93476e+06
P12367	cAMP-dependent protein kinase type II-alpha regulatory subunit [OS=Mus musculus]	Prkar2a	1.89756e+07	1.68289e+07	1.81699e+07	1.9269e+07	1.75174e+07	2.02979e+07	1.8947e+07	1.6959e+07	2.04903e+07	2.1062e+07	1.83667e+07	2.19004e+07
Q8BMF3	NADP-dependent malic enzyme, mitochondrial [OS=Mus musculus]	Me3	3.383e+06	3.71275e+06	3.10167e+06	4.20289e+06	2.85099e+06	1.8546e+06	2.61337e+06	3.31427e+06	2.79413e+06	2.65068e+06	3.46062e+06	3.55804e+06
P18052	Receptor-type tyrosine-protein phosphatase alpha [OS=Mus musculus]	Ptpra	8.67984e+06	8.58664e+06	9.43184e+06	9.24599e+06	8.43941e+06	1.04904e+07	9.0981e+06	9.09262e+06	1.28253e+07	1.15858e+07	1.05323e+07	1.06658e+07
Q8JZS0	Protein lin-7 homolog A [OS=Mus musculus]	Lin7a	3.65209e+07	3.17242e+07	3.65101e+07	3.56516e+07	3.26777e+07	3.49833e+07	3.48683e+07	3.62676e+07	3.59252e+07	3.2992e+07	3.00321e+07	3.34453e+07
Q9JLV5	Cullin-3 [OS=Mus musculus]	Cul3	1.1957e+07	1.37638e+07	1.14884e+07	1.23847e+07	1.26135e+07	1.15715e+07	1.17809e+07	1.28222e+07	1.23922e+07	1.32479e+07	1.52379e+07	1.475e+07
P67778	Prohibitin 1 [OS=Mus musculus]	Phb1	3.35288e+07	3.77952e+07	3.70829e+07	3.76604e+07	3.74007e+07	3.04779e+07	3.68792e+07	4.26814e+07	2.83902e+07	3.2058e+07	3.38735e+07	3.41875e+07
Q8BIZ1	Ankyrin repeat and sterile alpha motif domain-containing protein 1B [OS=Mus musculus]	Anks1b	2.35297e+07	2.25014e+07	2.14573e+07	2.11931e+07	1.67468e+07	1.77242e+07	1.89972e+07	2.3008e+07	2.40907e+07	2.39545e+07	2.88991e+07	2.93996e+07
P33175	Kinesin heavy chain isoform 5A [OS=Mus musculus]	Kif5a
Q8JZR6	Electroneutral sodium bicarbonate exchanger 1 [OS=Mus musculus]	Slc4a8	2.18228e+06	2.32372e+06	1.94689e+06	4.14607e+06	2.88817e+06	2.36759e+06	2.17884e+06	1.8127e+06	2.71131e+06	2.17895e+06	2.20864e+06	2.49442e+06
Q9QVP9	Protein-tyrosine kinase 2-beta [OS=Mus musculus]	Ptk2b	5.91331e+06	5.87108e+06	6.395e+06	5.29516e+06	6.1289e+06	7.37661e+06	7.40125e+06	7.046e+06	7.44933e+06	8.25335e+06	8.64279e+06	6.8107e+06
P22892	AP-1 complex subunit gamma-1 [OS=Mus musculus]	Ap1g1	1.01306e+07	9.19959e+06	8.09248e+06	1.03275e+07	9.62029e+06	9.83722e+06	9.84406e+06	1.18883e+07	1.11113e+07	1.02814e+07	1.04453e+07	1.02013e+07
Q9WUM4	Coronin-1C [OS=Mus musculus]	Coro1c	1.73114e+07	1.66457e+07	1.73647e+07	1.55942e+07	1.62653e+07	1.51458e+07	1.79947e+07	1.75791e+07	1.8552e+07	1.90682e+07	2.13906e+07	2.15168e+07
Q8BSL7	ADP-ribosylation factor 2 [OS=Mus musculus]	Arf2	432368	304988	441341	504162	372726	262925	310156	338467	586679	460732	422320	484114
Q63810	Calcineurin subunit B type 1 [OS=Mus musculus]	Ppp3r1	7.78455e+07	8.52571e+07	6.50934e+07	7.41654e+07	6.8316e+07	7.52078e+07	6.31092e+07	7.11363e+07	7.16987e+07	7.17768e+07	6.73785e+07	7.42632e+07
Q5SRX1	TOM1-like protein 2 [OS=Mus musculus]	Tom1l2	1.73922e+07	1.76275e+07	1.68216e+07	1.83285e+07	1.4797e+07	1.5695e+07	1.68383e+07	1.80689e+07	1.81721e+07	1.68664e+07	1.65224e+07	1.64397e+07
Q8K183	Pyridoxal kinase [OS=Mus musculus]	Pdxk	8.2305e+07	64967256	6.43656e+07	6.09049e+07	1.00154e+08	8.98135e+07	1.28814e+08	5.93616e+07	9.00298e+07	9.94829e+07	6.76287e+07	6.1453e+07
Q01768	Nucleoside diphosphate kinase B [OS=Mus musculus]	Nme2	1.46834e+07	1.51732e+07	1.48239e+07	1.72274e+07	1.65575e+07	1.67456e+07	1.64838e+07	1.8723e+07	1.69672e+07	1.65877e+07	1.77839e+07	1.75668e+07
Q9R1R2	Tripartite motif-containing protein 3 [OS=Mus musculus]	Trim3	1.28069e+07	1.19105e+07	1.21872e+07	1.14445e+07	1.23372e+07	1.20584e+07	1.22503e+07	1.32905e+07	1.13827e+07	1.37314e+07	1.28739e+07	1.38148e+07
Q9DBE8	Alpha-1,3/1,6-mannosyltransferase ALG2 [OS=Mus musculus]	Alg2	8.83204e+06	8.58382e+06	8.09215e+06	8.21665e+06	8.66271e+06	9.73378e+06	9.88794e+06	8.66027e+06	8.4006e+06	8.06796e+06	9.6355e+06	8.51854e+06
Q5SSM3	Rho GTPase-activating protein 44 [OS=Mus musculus]	Arhgap44	8.5167e+06	5.30458e+06	9.37099e+06	5.22673e+06	8.16156e+06	5.35086e+06	9.31065e+06	5.37406e+06	9.74743e+06	6.76343e+06	1.05134e+07	6.52525e+06
Q3UH60	Disco-interacting protein 2 homolog B [OS=Mus musculus]	Dip2b	4.29379e+06	4.55543e+06	5.0716e+06	4.75656e+06	4.79888e+06	5.21459e+06	5.32037e+06	4.9875e+06	5.33163e+06	4.7696e+06	4.38792e+06	5.34281e+06
Q9QUP5	Hyaluronan and proteoglycan link protein 1 [OS=Mus musculus]	Hapln1	1.68224e+07	1.55727e+07	1.62884e+07	1.3834e+07	1.36807e+07	1.6983e+07	13869592	1.37348e+07	1.4752e+07	1.51029e+07	1.3239e+07	1.55063e+07
Q6P5F9	Exportin-1 [OS=Mus musculus]	Xpo1	2.7023e+06	2.72523e+06	2.77881e+06	3.20727e+06	2.18632e+06	2.02009e+06	2.78654e+06	3.53651e+06	2.97032e+07	3.14151e+06	3.35264e+06	3.48527e+06
P29387	Guanine nucleotide-binding protein subunit beta-4 [OS=Mus musculus]	Gnb4	6.40292e+06	6.04654e+06	7.67717e+06	6.05738e+06	6.3537e+06	6.25382e+06	6.43013e+06	5.74432e+06	6.85458e+06	6.76375e+06	6.63074e+06	5.64923e+06
O35129	Prohibitin-2 [OS=Mus musculus]	Phb2	2.20368e+07	2.47803e+07	2.37775e+07	2.47404e+07	2.15633e+07	1.77288e+07	2.45699e+07	2.47017e+07	2.06923e+07	2.0301e+07	2.73375e+07	2.46529e+07
Q9QWY8	Arf-GAP with SH3 domain, ANK repeat and PH domain-containing protein 1 [OS=Mus musculus]	Asap1	2.03353e+07	1.81761e+07	1.91868e+07	2.08164e+07	1.85741e+07	1.90713e+07	1.92633e+07	2.14774e+07	2.02452e+07	2.21515e+07	1.92228e+07	2.01693e+07
Q9R1Q8	Transgelin-3 [OS=Mus musculus]	Tagln3	6.55785e+07	6.61138e+07	6.9093e+07	7.07374e+07	6.25251e+07	6.59197e+07	6.64727e+07	6.59223e+07	6.77456e+07	7.48085e+07	6.88873e+07	7.11133e+07
Q9Z0P5	Twinfilin-2 [OS=Mus musculus]	Twf2	7.97588e+06	7.59787e+06	1.09921e+07	1.09402e+07	1.03903e+07	1.03372e+07	9.62577e+06	1.15221e+07	8.13182e+06	7.95227e+06	8.00452e+06	8.27998e+06
P62821	Ras-related protein Rab-1A [OS=Mus musculus]	Rab1A	7.00083e+07	5.6982e+07	7.22271e+07	5.85242e+07	6.89857e+07	5.4965e+07	7.28074e+07	5.50338e+07	7.2063e+07	6.15307e+07	7.46017e+07	5.83286e+07
Q8C0T5	Signal-induced proliferation-associated 1-like protein 1 [OS=Mus musculus]	Sipa1l1	3.31082e+06	3.80576e+06	4.73823e+06	3.16487e+06	5.37221e+06	2.0274e+06	3.13998e+06	5.22803e+06	3.16798e+06	3.40001e+06	6.78774e+06	5.98347e+06
Q61171	Peroxiredoxin-2 [OS=Mus musculus]	Prdx2	6.03739e+07	6.01554e+07	58362154	5.98762e+07	6.26496e+07	6.34924e+07	6.20321e+07	6.27386e+07	6.81655e+07	6.21411e+07	6.71061e+07	6.04764e+07
Q99N28	Cell adhesion molecule 3 [OS=Mus musculus]	Cadm3	5.07752e+07	4.64901e+07	4.81723e+07	4.4506e+07	4.32805e+07	4.86178e+07	4.24002e+07	5.64519e+07	5.62336e+07	5.77235e+07	4.6305e+07	6.13005e+07
Q6DFV3	Rho GTPase-activating protein 21 [OS=Mus musculus]		6.59551e+06	5.32644e+06	6.2151e+06	5.46952e+06	6.03309e+06	6.62491e+06	6.65596e+06	5.33508e+06	7.89013e+06	7.21142e+06	6.89201e+06	6.43051e+06
P60487	Chronophin [OS=Mus musculus]	Pdxp	2.48989e+07	2.77686e+07	2.89024e+07	2.65905e+07	2.53624e+07	2.79742e+07	2.67389e+07	2.81475e+07	3.32869e+07	3.26865e+07	3.35654e+07	3.13849e+07
Q9QZQ1	Afadin [OS=Mus musculus]	Afdn	3.49037e+06	4.31336e+06	4.33936e+06	4.00179e+06	3.96446e+06	3.36365e+06	4.07823e+06	3.04596e+06	4.43817e+06	5.4232e+06	6.03381e+06	4.8609e+06
O88704	Potassium/sodium hyperpolarization-activated cyclic nucleotide-gated channel 1 [OS=Mus musculus]	Hcn1	9.99693e+06	7.93873e+06	9.68084e+06	8.20263e+06	8.81707e+06	8.39103e+06	9.07593e+06	6.36981e+06	1.03426e+07	9.33259e+06	8.95672e+06	8.1272e+06
P04370	Myelin basic protein [OS=Mus musculus]	Mbp	1062967679	8.75472e+08	1035113057	1013283874	1392619014	8.43888e+08	1140498112	8.98569e+08	6.9825e+08	1091967182	1091140447	9.84824e+08
Q8BP47	Asparagine--tRNA ligase, cytoplasmic [OS=Mus musculus]	NARS1	1.06852e+07	1.03612e+07	9.50095e+06	1.21631e+07	1.48516e+07	1.23391e+07	1.25023e+07	1.44061e+07	1.36684e+07	1.20289e+07	1.45916e+07	1.41263e+07
Q9D819	Inorganic pyrophosphatase [OS=Mus musculus]	Ppa1	2.42809e+07	2.67075e+07	2.18872e+07	2.66795e+07	2.82143e+07	2.72169e+07	2.76459e+07	2.17029e+07	2.57843e+07	2.58932e+07	2.88815e+07	2.28472e+07
Q9EPJ9	ADP-ribosylation factor GTPase-activating protein 1 [OS=Mus musculus]	Arfgap1	1.00168e+07	1.09802e+07	1.04057e+07	1.06184e+07	8.05998e+06	9.86697e+06	8.39686e+06	9.41449e+06	8.71523e+06	9.27343e+06	1.09443e+07	1.11749e+07
Q99PT1	Rho GDP-dissociation inhibitor 1 [OS=Mus musculus]	Arhgdia	3.27251e+07	3.6407e+07	3.3765e+07	3.3399e+07	3.51279e+07	3.56646e+07	3.56527e+07	3.52478e+07	3.81942e+07	3.80978e+07	3.62296e+07	3.46506e+07
P97315	Cysteine and glycine-rich protein 1 [OS=Mus musculus]	Csrp1	2.63859e+07	2.23719e+07	2.38784e+07	1.92508e+07	2.83231e+07	2.69927e+07	2.59583e+07	1.57931e+07	2.96015e+07	2.58292e+07	2.76013e+07	2.06106e+07
A2A5R2	Brefeldin A-inhibited guanine nucleotide-exchange protein 2 [OS=Mus musculus]	Arfgef2	3.02507e+06	3.40388e+06	3.23201e+06	3.50072e+06	3.25052e+06	2.99715e+06	2.93171e+06	3.13978e+06	3.67408e+06	3.17459e+06	3.0232e+06	3.61106e+06
O88485	Cytoplasmic dynein 1 intermediate chain 1 [OS=Mus musculus]	Dync1i1	1.08499e+07	1.07422e+07	1.12531e+07	1.08787e+07	9.92374e+06	7.86774e+06	1.01017e+07	8.86482e+06	1.10529e+07	1.18192e+07	1.16094e+07	1.16718e+07
P59764	Dedicator of cytokinesis protein 4 [OS=Mus musculus]	Dock4	2.3393e+06	1.27529e+06	1.66954e+06	1.46286e+06	2.06256e+06	2.04148e+06	1.98081e+06	2.19988e+06	2.53334e+06	2.54941e+06	2.09446e+06	2.06866e+06
Q8CC35	Synaptopodin [OS=Mus musculus]	Synpo	1.97671e+07	2.02741e+07	1.89957e+07	2.15436e+07	1.6182e+07	1.69622e+07	2.24375e+07	2.01579e+07	1.83387e+07	1.8158e+07	2.48418e+07	2.22185e+07
Q8VHI6	Wiskott-Aldrich syndrome protein family member 3 [OS=Mus musculus]	Wasf3	5.79079e+06	6.57346e+06	6.0449e+06	6.79181e+06	5.00512e+06	6.03778e+06	5.43299e+06	5.80168e+06	9.72235e+06	8.5378e+06	8.02322e+06	8.49001e+06
O88910	MAGUK p55 subfamily member 3 [OS=Mus musculus]	Mpp3	7.346e+06	5.33588e+06	6.17599e+06	6.69579e+06	6.72767e+06	5.836e+06	6.18682e+06	5.50489e+06	9.15665e+06	7.8426e+06	7.29141e+06	4.98113e+06
B1AZP2	Disks large-associated protein 4 [OS=Mus musculus]	Dlgap4	9.60406e+06	1.22704e+07	1.19217e+07	1.1375e+07	9.41492e+06	8.81089e+06	9.14023e+06	9.4013e+06	8.86586e+06	9.99108e+06	1.278e+07	1.108e+07
P10649	Glutathione S-transferase Mu 1 [OS=Mus musculus]	Gstm1	4.89458e+07	5.80107e+07	6.20659e+07	5.0788e+07	4.95957e+07	6.17146e+07	5.56972e+07	6.30062e+07	9.243e+07	8.60056e+07	1.03301e+08	9.26881e+07
Q8BVI4	Dihydropteridine reductase [OS=Mus musculus]	Qdpr	2.37087e+07	2.80078e+07	2.61694e+07	2.7126e+07	3.32303e+07	2.68102e+07	2.99693e+07	2.6126e+07	2.29641e+07	2.71314e+07	2.55329e+07	2.65679e+07
Q80XI4	Phosphatidylinositol 5-phosphate 4-kinase type-2 beta [OS=Mus musculus]	Pip4k2b	2.09124e+07	2.17095e+07	2.19539e+07	2.26215e+07	2.14097e+07	2.15893e+07	2.15417e+07	2.03814e+07	20573625	2.28842e+07	2.27865e+07	2.27289e+07
Q9CZ44	NSFL1 cofactor p47 [OS=Mus musculus]	Nsfl1c	1.32495e+07	1.63208e+07	1.54069e+07	1.57482e+07	14652287	1.66264e+07	1.52387e+07	1.39479e+07	1.6694e+07	1.82952e+07	1.7203e+07	1.79796e+07
Q9JL04	Formin-2 [OS=Mus musculus]	Fmn2	3.00979e+06	2.97516e+06	3.05389e+06	2.85184e+06	2.08349e+06	2.79012e+06	2.19525e+06	2.97312e+06	4.58827e+06	4.29994e+06	3.3461e+06	4.27341e+06
P62823	Ras-related protein Rab-3C [OS=Mus musculus]	Rab3c	7.79073e+07	8.18356e+07	8.88772e+07	7.64796e+07	7.32406e+07	6.93139e+07	6.8728e+07	9.58311e+07	9.65041e+07	8.6941e+07	9.15807e+07	1.0833e+08
P48774	Glutathione S-transferase Mu 5 [OS=Mus musculus]	Gstm5	2.61121e+07	2.8998e+07	2.72233e+07	2.57731e+07	2.20951e+07	2.89866e+07	2.93151e+07	2.88447e+07	3.50972e+07	3.31509e+07	3.44972e+07	2.7611e+07
Q9ESN6	Tripartite motif-containing protein 2 [OS=Mus musculus]	Trim2	1.786e+07	1.63924e+07	1.67716e+07	1.55986e+07	1.49612e+07	1.63013e+07	1.57758e+07	1.37472e+07	1.82963e+07	1.82608e+07	1.7555e+07	1.73822e+07
Q99LC3	NADH dehydrogenase [ubiquinone] 1 alpha subcomplex subunit 10, mitochondrial [OS=Mus musculus]	Ndufa10	2.63477e+07	2.62857e+07	2.52694e+07	3.0537e+07	2.52347e+07	1.69299e+07	25077670	2.51014e+07	1.99647e+07	2.34804e+07	2.43609e+07	2.61536e+07
P84084	ADP-ribosylation factor 5 [OS=Mus musculus]	Arf5	1.25676e+07	1.36035e+07	1.17082e+07	1.36548e+07	13482356	1.53438e+07	1.42028e+07	1.38244e+07	1.07407e+07	1.14344e+07	1.101e+07	1.00021e+07
Q9D5V5	Cullin-5 [OS=Mus musculus]	Cul5	6.6453e+06	7.26829e+06	6.48097e+06	6.60331e+06	6.08833e+06	6.88827e+06	6.57669e+06	6.97933e+06	7.78752e+06	7.81345e+06	7.53231e+06	7.42034e+06
Q8C0E2	Vacuolar protein sorting-associated protein 26B [OS=Mus musculus]	Vps26b	1.4166e+07	1.44383e+07	1.57114e+07	1.33446e+07	1.3633e+07	1.43043e+07	1.58643e+07	1.23338e+07	1.53788e+07	1.55577e+07	1.62022e+07	1.50131e+07
Q6PER3	Microtubule-associated protein RP/EB family member 3 [OS=Mus musculus]	Mapre3	3.88885e+07	3.88566e+07	4.25448e+07	4.05014e+07	3.50628e+07	3.68211e+07	3.74743e+07	3.67993e+07	4.53635e+07	4.35692e+07	4.31496e+07	4.49549e+07
O88844	Isocitrate dehydrogenase [NADP] cytoplasmic [OS=Mus musculus]	Idh1	1.79799e+07	1.65358e+07	1.83368e+07	1.7661e+07	1.83983e+07	1.98284e+07	1.86299e+07	16918692	2.27015e+07	2.22986e+07	2.04325e+07	2.07654e+07
P23506	Protein-L-isoaspartate(D-aspartate) O-methyltransferase [OS=Mus musculus]	Pcmt1	2.72554e+07	2.59933e+07	2.47036e+07	2.9311e+07	2.74715e+07	2.91096e+07	2.68519e+07	2.94071e+07	2.43925e+07	2.55611e+07	2.55455e+07	2.46084e+07
P19157	Glutathione S-transferase P 1 [OS=Mus musculus]	Gstp1	3.11886e+07	3.69554e+07	3.02368e+07	3.46986e+07	3.91945e+07	3.4754e+07	3.86937e+07	4.23481e+07	3.20351e+07	3.27524e+07	3.41738e+07	3.91369e+07
P62196	26S proteasome regulatory subunit 8 [OS=Mus musculus]	Psmc5	9.94979e+06	1.04139e+07	9.59798e+06	8.99043e+06	1.08662e+07	1.02352e+07	1.2195e+07	1.12154e+07	9.21504e+06	9.34441e+06	9.58699e+06	7.15014e+06
P48036	Annexin A5 [OS=Mus musculus]	Anxa5	1.90623e+07	2.00328e+07	2.08976e+07	2.17805e+07	2.8452e+07	2.66477e+07	2.9304e+07	2.83149e+07	1.66839e+07	1.63556e+07	1.76441e+07	1.4774e+07
Q8K0S0	Phytanoyl-CoA hydroxylase-interacting protein [OS=Mus musculus]	Phyhip	2.60164e+07	2.66207e+07	2.32149e+07	2.57716e+07	2.80753e+07	3.31772e+07	3.14687e+07	3.03564e+07	3.04964e+07	2.53787e+07	2.61162e+07	2.06832e+07
Q9ESN9	C-Jun-amino-terminal kinase-interacting protein 3 [OS=Mus musculus]	Mapk8ip3	7.00484e+06	7.25036e+06	7.51166e+06	7.11511e+06	7.85832e+06	7.14355e+06	7.97476e+06	7.46351e+06	6.06229e+06	6.26969e+06	7.13933e+06	6.45717e+06
Q8BGN3	Glycerophosphocholine cholinephosphodiesterase ENPP6 [OS=Mus musculus]	Enpp6	7.36252e+06	6.43676e+06	6.62983e+06	7.1801e+06	9.399e+06	7.03739e+06	8.01475e+06	6.92399e+06	5.06094e+06	6.74635e+06	5.26821e+06	6.15557e+06
Q80ZJ1	Ras-related protein Rap-2a [OS=Mus musculus]	Rap2a	1.16666e+07	9.37254e+06	1.01637e+07	1.02227e+07	1.11253e+07	1.33939e+07	1.06983e+07	1.11366e+07	1.60891e+07	1.47748e+07	1.17167e+07	1.51558e+07
Q62167	ATP-dependent RNA helicase DDX3X [OS=Mus musculus]	Ddx3x	7.04766e+06	7.15171e+06	6.67116e+06	7.22649e+06	7.36791e+06	7.29369e+06	7.7535e+06	8.24816e+06	6.58688e+06	6.65684e+06	7.4141e+06	7.21996e+06
Q9QYB1	Chloride intracellular channel protein 4 [OS=Mus musculus]	Clic4	7.495e+06	6.97114e+06	6.81185e+06	6.59209e+06	1.02365e+07	8.50722e+06	9.05038e+06	7.63699e+06	4.57057e+06	5.90221e+06	5.10075e+06	5.62316e+06
P62881	Guanine nucleotide-binding protein subunit beta-5 [OS=Mus musculus]	Gnb5	3.12768e+07	2.76836e+07	2.83774e+07	2.95022e+07	2.91363e+07	3.31284e+07	3.15345e+07	3.13148e+07	2.62083e+07	26891077	2.39923e+07	2.81358e+07
Q9R0N7	Synaptotagmin-7 [OS=Mus musculus]	Syt7	2.18777e+07	18849298	2.12893e+07	1.87527e+07	1.57413e+07	1.86222e+07	1.55564e+07	1.91662e+07	2.47011e+07	2.36444e+07	2.16924e+07	2.35526e+07
Q80UW2	F-box only protein 2 [OS=Mus musculus]	Fbxo2	1.35575e+07	1.28491e+07	1.29338e+07	1.234e+07	1.36805e+07	1.30237e+07	1.20892e+07	1.06966e+07	1.30955e+07	1.42508e+07	1.25834e+07	1.22828e+07
Q8C522	Endonuclease domain-containing 1 protein [OS=Mus musculus]	Endod1	1.2645e+07	1.20552e+07	1.14868e+07	1.22585e+07	1.41811e+07	1.32885e+07	1.19739e+07	1.1403e+07	1.0519e+07	1.15123e+07	1.22593e+07	1.19519e+07
P70441	Na(+)/H(+) exchange regulatory cofactor NHE-RF1 [OS=Mus musculus]	Nherf1	2.97666e+07	2.92588e+07	2.85688e+07	2.74545e+07	2.79939e+07	3.86614e+07	3.22746e+07	3.34115e+07	3.26249e+07	3.16904e+07	3.1008e+07	3.05999e+07
Q9QZX7	Serine racemase [OS=Mus musculus]	Srr	1.09414e+07	1.28351e+07	1.12344e+07	1.40358e+07	1.34194e+07	1.44502e+07	1.38021e+07	1.55758e+07	1.365e+07	1.22852e+07	1.36727e+07	1.30949e+07
Q8CBE3	WD repeat-containing protein 37 [OS=Mus musculus]	Wdr37	6.17744e+07	6.75373e+07	7.51535e+07	6.54521e+07	6.91877e+07	6.68092e+07	5.7703e+07	5.10392e+07	7.12079e+07	5.89232e+07	6.86932e+07	5.32004e+07
P35436	Glutamate receptor ionotropic, NMDA 2A [OS=Mus musculus]	Grin2a	1.63759e+07	1.67129e+07	1.62575e+07	1.4966e+07	1.52774e+07	1.5492e+07	1.45405e+07	1.44748e+07	1.75371e+07	1.59019e+07	1.73626e+07	1.53122e+07
P15532	Nucleoside diphosphate kinase A [OS=Mus musculus]	Nme1	7.90771e+07	6.86653e+07	7.23258e+07	7.64906e+07	8.5777e+07	8.36618e+07	8.73381e+07	7.76983e+07	8.10451e+07	8.33016e+07	8.38376e+07	7.66476e+07
Q9ESJ4	NCK-interacting protein with SH3 domain [OS=Mus musculus]	Nckipsd	1.26577e+07	1.18894e+07	1.09379e+07	1.13844e+07	9.56463e+06	1.096e+07	1.10892e+07	1.00994e+07	1.18864e+07	1.29935e+07	1.27685e+07	1.05059e+07
Q9D6M3	Mitochondrial glutamate carrier 1 [OS=Mus musculus]	Slc25a22	2.65868e+07	3.60628e+07	2.93377e+07	32486905	3.03491e+07	23714520	3.14997e+07	2.70901e+07	2.93528e+07	3.0248e+07	3.69697e+07	3.45219e+07
P20918	Plasminogen [OS=Mus musculus]	Plg	1.31371e+07	1.11015e+07	7.14965e+06	1.07387e+07	1.58118e+07	1.32142e+07	2.20998e+07	1.19473e+07	4.9959e+06	4.20793e+06	4.14605e+06	4.31775e+06
Q2M3X8	Phosphatase and actin regulator 1 [OS=Mus musculus]	Phactr1	3.68944e+07	3.87861e+07	4.04144e+07	4.07145e+07	3.7375e+07	4.02706e+07	3.66977e+07	3.59115e+07	3.8559e+07	3.84054e+07	4.04096e+07	3.73266e+07
P63037	DnaJ homolog subfamily A member 1 [OS=Mus musculus]	Dnaja1	1.24554e+07	1.30057e+07	1.22336e+07	1.21616e+07	1.42072e+07	1.34142e+07	1.34776e+07	1.14246e+07	1.5854e+07	1.32666e+07	1.46781e+07	1.34304e+07
Q7TQI3	Ubiquitin thioesterase OTUB1 [OS=Mus musculus]	Otub1	2.25935e+07	2.29204e+07	2.18641e+07	2.26298e+07	2.30365e+07	2.39263e+07	2.31963e+07	2.49666e+07	2.41934e+07	2.22774e+07	2.43955e+07	2.34562e+07
Q61411	GTPase HRas [OS=Mus musculus]	Hras	3.25123e+07	2.79836e+07	2.97045e+07	3.15019e+07	2.93473e+07	3.105e+07	2.76865e+07	2.92452e+07	3.99671e+07	3.86287e+07	2.89651e+07	4.06007e+07
Q69ZK9	Neuroligin-2 [OS=Mus musculus]	Nlgn2	1.87056e+07	1.98381e+07	1.77806e+07	2.13986e+07	1.79267e+07	2.0257e+07	2.15323e+07	1.85892e+07	1.83749e+07	1.82933e+07	2.18541e+07	1.70389e+07
P61027	Ras-related protein Rab-10 [OS=Mus musculus]	Rab10	2.29887e+08	2.10441e+08	1.97634e+08	2.18532e+08	2.09084e+08	223641547	2.18969e+08	2.16583e+08	2.33205e+08	2.14429e+08	2.22312e+08	2.26587e+08
Q3ULJ0	Glycerol-3-phosphate dehydrogenase 1-like protein [OS=Mus musculus]	Gpd1l	1.45096e+07	1.7419e+07	1.60289e+07	1.64996e+07	1.60065e+07	1.99083e+07	1.56736e+07	1.78531e+07	1.66369e+07	1.73883e+07	1.55255e+07	1.68174e+07
Q9QYJ0	DnaJ homolog subfamily A member 2 [OS=Mus musculus]	Dnaja2	2.1007e+07	1.66958e+07	2.1165e+07	1.69582e+07	2.34466e+07	1.87057e+07	2.47903e+07	1.94697e+07	2.47494e+07	1.72095e+07	2.27901e+07	1.64948e+07
Q8C437	PEX5-related protein [OS=Mus musculus]	Pex5l	1.08924e+07	1.16135e+07	1.33358e+07	1.2877e+07	1.29602e+07	1.13035e+07	1.32127e+07	1.15893e+07	1.15497e+07	12130338	1.10276e+07	1.24548e+07
P12658	Calbindin [OS=Mus musculus]	Calb1	1.56024e+07	1.33745e+07	1.38359e+07	15623239	1.43423e+07	1.57738e+07	1.49619e+07	1.46094e+07	1.69197e+07	1.84854e+07	1.72832e+07	1.75911e+07
Q99K85	Phosphoserine aminotransferase [OS=Mus musculus]	Psat1	1.19139e+07	1.22659e+07	1.31492e+07	1.4573e+07	1.55423e+07	1.27789e+07	1.3966e+07	1.38512e+07	1.30733e+07	1.37402e+07	1.40151e+07	1.45495e+07
Q9QZB7	Actin-related protein 10 [OS=Mus musculus]	Actr10	4.84689e+06	4.8237e+06	4.64483e+06	5.50343e+06	4.11179e+06	5.45895e+06	4.75412e+06	5.18507e+06	5.28269e+06	4.08872e+06	4.60885e+06	4.97317e+06
Q641P0	Actin-related protein 3B [OS=Mus musculus]	Actr3b	9.80368e+06	9.95027e+06	7.77183e+06	9.50085e+06	9.27908e+06	9.66092e+06	1.06092e+07	9.40197e+06	1.02059e+07	9.47684e+06	9.59098e+06	9.4577e+06
Q9CQF9	Prenylcysteine oxidase 1 [OS=Mus musculus]	Pcyox1	5.03049e+06	5.23003e+06	5.48644e+06	5.20491e+06	5.73577e+06	5.52392e+06	6.8474e+06	6.82461e+06	4.87038e+06	4.67408e+06	5.76873e+06	5.11671e+06
O55042	Alpha-synuclein [OS=Mus musculus]	Snca	2.37665e+08	1.81946e+08	2.29448e+08	188300253	2.1988e+08	2.18333e+08	2.1268e+08	1.61148e+08	2.70874e+08	215101599	2.45071e+08	2.10181e+08
B9EJA2	Cortactin-binding protein 2 [OS=Mus musculus]	Cttnbp2	1.71595e+07	1.38878e+07	1.53219e+07	2.16203e+07	1.69395e+07	1.54833e+07	1.67225e+07	1.83246e+07	1.89e+07	2.07044e+07	1.68721e+07	1.89943e+07
P48318	Glutamate decarboxylase 1 [OS=Mus musculus]	Gad1	1.41421e+07	1.22169e+07	1.27951e+07	1.18434e+07	1.24935e+07	5.84389e+07	1.22384e+07	1.15331e+07	1.26949e+07	1.1002e+07	1.22369e+07	1.48826e+07
P63242	Eukaryotic translation initiation factor 5A-1 [OS=Mus musculus]	Eif5a	1.89028e+07	1.77382e+07	1.75593e+07	1.73861e+07	2.11849e+07	1.88205e+07	2.20404e+07	1.97301e+07	1.97084e+07	1.96055e+07	2.05355e+07	1.83134e+07
Q9ER00	Syntaxin-12 [OS=Mus musculus]	Stx12	1.48072e+07	1.50964e+07	1.508e+07	1.30099e+07	1.44349e+07	1.72298e+07	1.56458e+07	1.49757e+07	1.627e+07	1.50364e+07	1.60441e+07	1.65753e+07
Q61233	Plastin-2 [OS=Mus musculus]	Lcp1	863406	2.23453e+06	1.93761e+06	1.50853e+06	2.54421e+06	1.79743e+06	3.97157e+06	4.15699e+06	1.17476e+06	1.30717e+06	1.98536e+06	813946
P27546	Microtubule-associated protein 4 [OS=Mus musculus]	Map4	268388119	2.50779e+08	249041283	2.01014e+08	1.96987e+08	2.33516e+08	264417046	2.17446e+08	2.7512e+08	2.8366e+08	2.20463e+08	1.999e+08
Q8R2R9	AP-3 complex subunit mu-2 [OS=Mus musculus]	Ap3m2	1.1379e+07	1.23716e+07	1.22994e+07	1.11779e+07	1.10663e+07	1.13405e+07	1.2007e+07	1.30925e+07	1.28886e+07	1.21218e+07	1.3024e+07	1.32662e+07
O88487	Cytoplasmic dynein 1 intermediate chain 2 [OS=Mus musculus]	Dync1i2	2.76313e+07	2.54424e+07	2.34556e+07	3.30517e+07	3.16067e+07	3.81906e+07	3.1345e+07	2.48842e+07	2.50671e+07	2.79165e+07	2.33297e+07	2.13913e+07
Q8R0S4	Voltage-dependent L-type calcium channel subunit beta-4 [OS=Mus musculus]	Cacnb4	1.69139e+07	1.63924e+07	1.59368e+07	1.57987e+07	1.58629e+07	1.58631e+07	1.51846e+07	1.63998e+07	1.51599e+07	1.63298e+07	1.53222e+07	1.60137e+07
Q9WV69	Dematin [OS=Mus musculus]	Dmtn	2.34593e+07	2.07475e+07	2.19429e+07	2.18406e+07	1.84422e+07	1.92545e+07	2.1669e+07	1.97624e+07	2.09075e+07	2.30045e+07	2.458e+07	2.47166e+07
Q91ZU6	Dystonin [OS=Mus musculus]	Dst	3.98728e+06	2.63678e+06	3.36678e+06	3.31673e+06	2.90185e+06	2.39304e+06	3.88526e+06	2.24301e+06	3.61923e+06	2.81635e+06	4.02319e+06	3.33176e+06
Q8BIJ6	Isoleucine--tRNA ligase, mitochondrial [OS=Mus musculus]	Iars2	1.52465e+07	1.76084e+07	1.66611e+07	1.68531e+07	1.73096e+07	1.594e+07	1.74599e+07	1.91289e+07	1.89936e+07	1.50705e+07	1.89146e+07	1.76161e+07
Q91X72	Hemopexin [OS=Mus musculus]	Hpx	1.84263e+07	1.74874e+07	1.36335e+07	1.74958e+07	2.41962e+07	1.74997e+07	2.25978e+07	1.6804e+07	5.19696e+06	3.9516e+06	4.04043e+06	4.01597e+06
Q8BNW9	Kelch repeat and BTB domain-containing protein 11 [OS=Mus musculus]	Kbtbd11	8.41076e+06	8.34092e+06	8.50352e+06	8.44632e+06	8.23206e+06	9.7294e+06	9.59414e+06	7.72678e+06	9.4911e+06	9.84662e+06	1.09492e+07	8.93737e+06
Q5SVL6	Rap1 GTPase-activating protein 2 [OS=Mus musculus]	Rap1gap2	9.39876e+06	8.34353e+06	8.9126e+06	8.48663e+06	1.06675e+07	8.81669e+06	1.16044e+07	9.14486e+06	9.58859e+06	8.47915e+06	7.81336e+06	6.76998e+06
O88447	Kinesin light chain 1 [OS=Mus musculus]	Klc1	7.00781e+06	7.4764e+06	7.10233e+06	7.85258e+06	7.54234e+06	7.19979e+06	8.10863e+06	8.4742e+06	9.94196e+06	8.63317e+06	9.12065e+06	1.04129e+07
P61202	COP9 signalosome complex subunit 2 [OS=Mus musculus]	Cops2	1.18151e+07	1.5381e+07	1.37432e+07	1.30934e+07	1.32689e+07	1.17439e+07	1.46283e+07	2.11026e+07	1.53468e+07	1.42885e+07	1.58226e+07	1.70545e+07
O88544	COP9 signalosome complex subunit 4 [OS=Mus musculus]	Cops4	1.03375e+07	1.18602e+07	1.12089e+07	1.06187e+07	1.1604e+07	1.24981e+07	1.18328e+07	1.13729e+07	1.16319e+07	1.31294e+07	1.26457e+07	1.12442e+07
Q9DBP5	UMP-CMP kinase [OS=Mus musculus]	Cmpk1	1.37485e+07	1.51002e+07	1.36595e+07	1.62282e+07	1.51406e+07	1.59111e+07	1.48759e+07	1.69285e+07	1.6171e+07	1.59313e+07	1.46439e+07	1.55473e+07
P35700	Peroxiredoxin-1 [OS=Mus musculus]	Prdx1	5.61858e+07	5.62132e+07	5.01769e+07	5.41449e+07	6.49639e+07	6.25952e+07	6.71974e+07	7.04233e+07	6.36392e+07	6.50286e+07	6.83016e+07	6.55577e+07
Q3TPX4	Exocyst complex component 5 [OS=Mus musculus]	Exoc5	7.96279e+06	8.43013e+06	9.06813e+06	8.24113e+06	8.54007e+06	8.27268e+06	8.18888e+06	8.79265e+06	9.24017e+06	9.70686e+06	9.79025e+06	8.12065e+06
Q91YQ5	Dolichyl-diphosphooligosaccharide--protein glycosyltransferase subunit 1 [OS=Mus musculus]	Rpn1	7.09157e+06	7.59564e+06	7.7033e+06	7.29141e+06	9.07648e+06	7.02676e+06	9.53336e+06	8.47804e+06	7.17571e+06	6.4448e+06	7.66845e+06	1.00656e+07
Q62433	Protein NDRG1 [OS=Mus musculus]	Ndrg1	1.44211e+07	1.36554e+07	1.64523e+07	1.4382e+07	1.91567e+07	1.29579e+07	1.88314e+07	1.47806e+07	1.25778e+07	1.65857e+07	1.41732e+07	1.55281e+07
O54983	Ketimine reductase mu-crystallin [OS=Mus musculus]	Crym	2.21538e+07	3.6178e+07	2.95678e+07	1.70698e+07	2.27757e+07	2.70368e+07	1.8766e+07	2.12158e+07	5.23435e+07	5.29979e+07	5.40411e+07	4.63563e+07
Q9D1G1	Ras-related protein Rab-1B [OS=Mus musculus]	Rab1b	1.61326e+07	1.65152e+07	1.40659e+07	1.42278e+07	1.45193e+07	1.45429e+07	1.58827e+07	1.60209e+07	1.70958e+07	1.65407e+07	1.6511e+07	1.74842e+07
P35278	Ras-related protein Rab-5C [OS=Mus musculus]	Rab5c	3.67352e+07	3.9898e+07	3.82784e+07	3.91824e+07	3.88869e+07	3.90974e+07	4.47902e+07	4.50935e+07	3.93165e+07	3.90412e+07	3.99535e+07	4.16727e+07
P53810	Phosphatidylinositol transfer protein alpha isoform [OS=Mus musculus]	Pitpna	2.7524e+07	2.6764e+07	3.57187e+07	2.78833e+07	3.09592e+07	2.9898e+07	2.96024e+07	4.07244e+07	2.67346e+07	2.99236e+07	2.97013e+07	3.10606e+07
Q68FH0	Plakophilin-4 [OS=Mus musculus]	Pkp4	3.01878e+06	2.79289e+06	2.90945e+06	2.63474e+06	2.65685e+06	2.54535e+06	2.74856e+06	2.29922e+06	3.49476e+06	3.60591e+06	3.43211e+06	3.46036e+06
O54833	Casein kinase II subunit alpha' [OS=Mus musculus]	Csnk2a2	1.00949e+07	9.47697e+06	1.01996e+07	1.10388e+07	9.16504e+06	1.03296e+07	1.00108e+07	1.00579e+07	1.01304e+07	9.38135e+06	1.13225e+07	1.03276e+07
Q80Z24	Neuronal growth regulator 1 [OS=Mus musculus]	Negr1	4.49295e+07	4.35745e+07	4.24036e+07	4.45313e+07	4.39737e+07	4.94718e+07	4.21045e+07	5.19459e+07	5.66415e+07	6.44891e+07	5.58062e+07	6.16468e+07
Q3UUG6	TBC1 domain family member 24 [OS=Mus musculus]	Tbc1d24	3.542e+07	3.3709e+07	3.41631e+07	3.12491e+07	3.21454e+07	3.51394e+07	3.39374e+07	3.21219e+07	3.66455e+07	3.36326e+07	3.16104e+07	3.08661e+07
P56695	Wolframin [OS=Mus musculus]	Wfs1	6.55347e+06	6.88532e+06	8.10123e+06	4.76634e+06	6.13849e+06	6.89249e+06	7.47257e+06	6.5022e+06	1.09221e+07	1.05623e+07	1.08359e+07	8.26353e+06
Q61753	D-3-phosphoglycerate dehydrogenase [OS=Mus musculus]	Phgdh	2.81942e+07	3.31199e+07	3.23143e+07	3.17671e+07	3.35493e+07	4.06539e+07	3.98736e+07	3.56214e+07	3.92788e+07	3.77349e+07	3.76021e+07	3.61888e+07
Q3UVL4	Vacuolar protein sorting-associated protein 51 homolog [OS=Mus musculus]	Vps51	3.59962e+06	3.19171e+06	3.48728e+06	3.58493e+06	3.79742e+06	3.47142e+06	3.5376e+06	4.16832e+06	4.38899e+06	4.12089e+06	3.7574e+06	3.75228e+06
E9PUL5	Proline-rich transmembrane protein 2 [OS=Mus musculus]	Prrt2	7.22733e+07	4.61031e+07	6.67115e+07	5.41775e+07	6.70563e+07	5.64911e+07	6.47815e+07	4.78832e+07	5.1141e+07	4.35287e+07	5.17465e+07	4.41306e+07
Q69Z98	Serine/threonine-protein kinase BRSK2 [OS=Mus musculus]	Brsk2	2.5227e+06	3.30496e+06	2.53321e+06	3.51163e+06	3.01277e+06	2.78071e+06	2.42728e+06	2.98714e+06	3.19893e+06	2.82125e+06	3.20669e+06	3.24652e+06
Q791V5	Mitochondrial carrier homolog 2 [OS=Mus musculus]	Mtch2	1.50572e+07	1.53908e+07	1.56134e+07	1.62958e+07	1.65945e+07	1.10527e+07	1.52747e+07	1.53842e+07	1.54212e+07	1.42547e+07	1.61463e+07	1.60458e+07
Q9DCN2	NADH-cytochrome b5 reductase 3 [OS=Mus musculus]	Cyb5r3	4.56918e+07	4.34276e+07	4.18289e+07	3.8457e+07	3.7768e+07	4.355e+07	4.18094e+07	3.78678e+07	4.63282e+07	4.891e+07	4.37752e+07	4.25181e+07
Q62418	Drebrin-like protein [OS=Mus musculus]	Dbnl	9.36215e+06	1.18188e+07	1.05221e+07	1.08157e+07	1.09818e+07	1.12879e+07	1.11333e+07	1.19076e+07	1.35101e+07	1.41712e+07	1.54368e+07	1.40135e+07
Q6ZPJ3	(E3-independent) E2 ubiquitin-conjugating enzyme UBE2O [OS=Mus musculus]	Ube2o	7.71931e+06	9.07137e+06	5.63196e+06	7.13608e+06	6.88688e+06	7.86723e+06	7.51634e+06	6.31721e+06	7.61189e+06	7.80438e+06	7.16974e+06	7.47155e+06
Q9CZ30	Obg-like ATPase 1 [OS=Mus musculus]	Ola1	9.4268e+06	1.07755e+07	9.15931e+06	9.9023e+06	9.80674e+06	1.17731e+07	9.21213e+06	1.0354e+07	1.23778e+07	1.27767e+07	1.14404e+07	1.09698e+07
Q91ZJ5	UTP--glucose-1-phosphate uridylyltransferase [OS=Mus musculus]	Ugp2	6.20366e+06	7.08504e+06	6.60557e+06	7.44346e+06	6.89246e+06	7.45672e+06	7.53819e+06	7.33724e+06	9.16147e+06	7.96859e+06	9.22913e+06	8.00825e+06
P58404	Striatin-4 [OS=Mus musculus]	Strn4	3.04209e+06	3.12871e+06	3.15815e+06	2.53364e+06	2.94137e+06	2.79021e+06	2.9554e+06	2.94354e+06	4.00667e+06	3.85924e+06	4.3784e+06	3.8766e+06
P61226	Ras-related protein Rap-2b [OS=Mus musculus]	Rap2b	3.52445e+07	32155711	3.31666e+07	3.2363e+07	3.08931e+07	3.57924e+07	3.23847e+07	3.56663e+07	5.07664e+07	4.25641e+07	3.998e+07	4.3809e+07
Q9WTX6	Cullin-1 [OS=Mus musculus]	Cul1	3.5807e+06	4.10783e+06	4.69346e+06	3.81245e+06	4.74375e+06	3.74755e+06	3.84436e+06	3.88035e+06	3.77319e+06	4.48527e+06	3.77731e+06	3.70043e+06
Q8BTG7	Protein NDRG4 [OS=Mus musculus]	Ndrg4	1.70151e+07	1.85481e+07	1.98895e+07	1.63585e+07	1.79491e+07	2.11328e+07	2.21658e+07	1.9241e+07	1.79103e+07	1.61598e+07	1.62504e+07	1.57235e+07
Q99JI6	Ras-related protein Rap-1b [OS=Mus musculus]	Rap1b	4.07442e+07	3.84232e+07	3.64284e+07	3.54891e+07	3.83766e+07	3.91842e+07	3.94792e+07	4.09229e+07	3.37392e+07	3.68596e+07	3.53357e+07	3.8435e+07
Q62443	Neuronal pentraxin-1 [OS=Mus musculus]	Nptx1	3.76739e+07	3.47646e+07	4.07436e+07	4.25099e+07	4.86065e+07	4.20906e+07	4.11457e+07	4.32533e+07	3.39924e+07	4.09116e+07	3.67129e+07	3.70367e+07
A2A690	Protein TANC2 [OS=Mus musculus]	Tanc2	9.14527e+06	8.07034e+06	8.67466e+06	9.32632e+06	8.8458e+06	9.14623e+06	8307615	9.39895e+06	1.04746e+07	9.04488e+06	1.14506e+07	1.13886e+07
P42208	Septin-2 [OS=Mus musculus]	Septin2	7.40458e+06	7.1298e+06	6.05962e+06	7.37102e+06	7.49548e+06	7.84962e+06	8.92926e+06	6.86425e+06	9.87586e+06	9.13656e+06	8.87478e+06	8.4659e+06
Q6ZPQ6	Membrane-associated phosphatidylinositol transfer protein 2 [OS=Mus musculus]	Pitpnm2	1.67411e+07	1.57353e+07	1.5061e+07	1.64518e+07	1.54592e+07	1.82401e+07	1.73949e+07	1.50452e+07	1.51593e+07	1.5612e+07	1.47848e+07	1.35439e+07
Q9CZT8	Ras-related protein Rab-3B [OS=Mus musculus]	Rab3b	1.18252e+07	1.2432e+07	1.29986e+07	1.05643e+07	1.03398e+07	1.19412e+07	9.33597e+06	1.04025e+07	1.57887e+07	1.89982e+07	1.52677e+07	1.51394e+07
Q6PE13	Proline-rich transmembrane protein 3 [OS=Mus musculus]	Prrt3	1.01441e+07	1.08053e+07	1.01538e+07	1.11093e+07	9.31949e+06	1.11767e+07	9.36022e+06	9.45493e+06	1.15911e+07	1.08077e+07	9.71654e+06	1.13354e+07
Q8R0A7	Uncharacterized protein KIAA0513 [OS=Mus musculus]	Kiaa0513	1.96923e+07	2.0463e+07	1.74194e+07	2.19525e+07	2.08156e+07	2.14791e+07	2.19581e+07	2.0782e+07	1.88489e+07	1.73484e+07	1.85279e+07	1.80344e+07
Q9Z1Z0	General vesicular transport factor p115 [OS=Mus musculus]	Uso1	4.59107e+06	4.85286e+06	4.37485e+06	4.12287e+06	5.27377e+06	5.07198e+06	5.33815e+06	4.99383e+06	4.6728e+06	4.79394e+06	4.62543e+06	3.9375e+06
O70503	Very-long-chain 3-oxoacyl-CoA reductase [OS=Mus musculus]	Hsd17b12	5.19086e+07	4.06679e+07	4.16483e+07	3.69389e+07	4.09262e+07	4.96835e+07	3.97359e+07	4.34727e+07	4.58404e+07	4.20167e+07	4.10209e+07	3.51694e+07
O88448	Kinesin light chain 2 [OS=Mus musculus]	Klc2	1.19465e+07	1.28592e+07	1.245e+07	1.10311e+07	1.00537e+07	1.33219e+07	1.26371e+07	1.37928e+07	1.14211e+07	1.20411e+07	1.24674e+07	1.25758e+07
P09671	Superoxide dismutase [Mn], mitochondrial [OS=Mus musculus]	Sod2	2.49032e+07	3.04491e+07	3.02994e+07	3.47625e+07	3.66151e+07	2.06149e+07	2.89832e+07	2.85256e+07	2.55724e+07	2.48133e+07	3.41069e+07	3.20133e+07
Q06890	Clusterin [OS=Mus musculus]	Clu	1.94522e+07	2.44089e+07	2.07378e+07	2.29041e+07	3.87184e+07	3.90922e+07	3.36308e+07	3.59264e+07	1.71629e+07	1.47192e+07	1.55295e+07	1.52116e+07
P46638	Ras-related protein Rab-11B [OS=Mus musculus]	Rab11b	5.32661e+07	5.90819e+07	5.80531e+07	5.6979e+07	5.71013e+07	5.92859e+07	5.98274e+07	5.54879e+07	5.90182e+07	6.10414e+07	6.27868e+07	5.97151e+07
Q6PDL0	Cytoplasmic dynein 1 light intermediate chain 2 [OS=Mus musculus]	Dync1li2	1.17125e+07	7.85236e+06	1.16071e+07	8.68978e+06	1.45357e+07	1.68227e+07	1.34503e+07	1.27422e+07	1.39938e+07	1.24042e+07	1.25299e+07	1.0578e+07
Q8BH57	WD repeat-containing protein 48 [OS=Mus musculus]	Wdr48	8.1957e+06	7.46647e+06	7.55586e+06	7.2183e+06	7.1719e+06	6.1576e+06	7.70634e+06	6.57647e+06	8.0142e+06	7.13322e+06	6.88869e+06	7.12689e+06
O54865	Guanylate cyclase soluble subunit beta-1 [OS=Mus musculus]	Gucy1b1	1.01317e+07	9.33408e+06	9.50456e+06	9.44734e+06	9.35756e+06	9.62703e+06	9.03182e+06	9.94479e+06	1.13071e+07	1.06007e+07	9.71626e+06	1.16717e+07
Q9CR16	Peptidyl-prolyl cis-trans isomerase D [OS=Mus musculus]	Ppid	1.23239e+07	1.25275e+07	1.33476e+07	1.22612e+07	1.34688e+07	1.48368e+07	1.49e+07	1.4455e+07	1.68624e+07	1.51851e+07	1.68461e+07	1.52363e+07
Q5FWK3	Rho GTPase-activating protein 1 [OS=Mus musculus]	Arhgap1	1.00748e+07	1.04846e+07	9.98405e+06	1.25864e+07	10434907	2.60826e+07	9.86313e+06	1.17296e+07	1.03401e+07	1.00788e+07	1.07443e+07	1.04947e+07
Q8CJ19	[F-actin]-monooxygenase MICAL3 [OS=Mus musculus]	Mical3	8.08367e+06	8.19576e+06	7.48276e+06	8.39789e+06	8.42286e+06	6.44127e+06	8.26054e+06	8.15822e+06	9.34199e+06	8.86397e+06	7.90177e+06	9.49708e+06
Q7M6Y3	Phosphatidylinositol-binding clathrin assembly protein [OS=Mus musculus]	Picalm	7.92625e+06	6.64053e+06	8.36735e+06	8.74981e+06	7.16963e+06	7.40957e+06	7.18845e+06	9.02439e+06	8.13426e+06	8.0932e+06	7.93604e+06	8.90858e+06
P23242	Gap junction alpha-1 protein [OS=Mus musculus]	Gja1	1.45442e+07	1.93152e+07	1.34484e+07	1.14784e+07	1.68472e+07	2.35757e+07	1.53877e+07	1.33023e+07	2.06987e+07	1.97689e+07	1.89346e+07	1.57827e+07
P00405	Cytochrome c oxidase subunit 2 [OS=Mus musculus]	Mtco2	6.37516e+07	7.11887e+07	6.20695e+07	7.0679e+07	6.5226e+07	4.56036e+07	6.80825e+07	6.65564e+07	5.24768e+07	5.7517e+07	6.94367e+07	6.34937e+07
Q03734	Serine protease inhibitor A3M [OS=Mus musculus]	Serpina3m	1.04202e+06	1.25598e+06	1.49711e+06	2.79305e+06	1.43965e+06	694994	925825	2.69626e+06	58861.3	50395.5	5394.47
Q9CQD1	Ras-related protein Rab-5A [OS=Mus musculus]	Rab5a	1.15313e+07	9.50748e+06	1.00114e+07	1.0286e+07	1.02333e+07	7.80528e+06	1.04961e+07	9.38652e+06	1.18298e+07	1.05576e+07	1.20039e+07	9.6172e+06
A2RT62	F-box/LRR-repeat protein 16 [OS=Mus musculus]	Fbxl16	9.98944e+06	1.0512e+07	8.32455e+06	1.12831e+07	8.24243e+06	7.31941e+06	8.39829e+06	8.79743e+06	9.8963e+06	9.82047e+06	1.11859e+07	1.01374e+07
Q60931	Voltage-dependent anion-selective channel protein 3 [OS=Mus musculus]	Vdac3	3.46358e+07	3.971e+07	3.89926e+07	4.00975e+07	3.81941e+07	2.23944e+07	3.46518e+07	4.14793e+07	3.12713e+07	3.43035e+07	4.66658e+07	4.86717e+07
Q3TY60	Protein FAM131B [OS=Mus musculus]	Fam131b	7.43318e+06	7.18107e+06	7.25413e+06	7.50561e+06	6.43528e+06	8.19871e+06	6.57734e+06	6.76863e+06	7.34854e+06	7.37422e+06	7.22923e+06	7.21602e+06
Q8JZP2	Synapsin-3 [OS=Mus musculus]	Syn3	6.90613e+06	7.05128e+06	6.03253e+06	8.28184e+06	6.15513e+06	6.70543e+06	4.87957e+06	6.75168e+06	7.31315e+06	8.43789e+06	1.01947e+07	8.96303e+06
A2ALS5	Rap1 GTPase-activating protein 1 [OS=Mus musculus]	Rap1gap	4.53464e+06	3.84115e+06	5.28758e+06	4.05275e+06	4.86394e+06	3.92881e+06	6.74473e+06	4.34778e+06	5.81634e+06	5.16218e+06	4.74044e+06	4.56005e+06
Q80VC9	Calmodulin-regulated spectrin-associated protein 3 [OS=Mus musculus]	Camsap3	3.57342e+06	4.02309e+06	3.78289e+06	3.04926e+06	2.1866e+06	3.60778e+06	3.42412e+06	3.10586e+06	5.70242e+06	5.93406e+06	5.05982e+06	5.90389e+06
Q3U1J4	DNA damage-binding protein 1 [OS=Mus musculus]	Ddb1	5.97912e+06	5.39058e+06	4.89333e+06	5.68719e+06	5.5433e+06	6.13534e+06	6.56603e+06	6.14643e+06	6.45631e+06	6.5734e+06	6.40673e+06	6.42355e+06
Q8VE33	Ganglioside-induced differentiation-associated protein 1-like 1 [OS=Mus musculus]	Gdap1l1	6.29707e+06	7.50603e+06	6.21359e+06	6.80678e+06	6.71936e+06	5.21278e+06	7.23657e+06	6.93522e+06	7.70335e+06	7.22482e+06	8.02357e+06	7.49144e+06
Q99KY4	Cyclin-G-associated kinase [OS=Mus musculus]	Gak	2.43589e+06	2.81499e+06	2.64651e+06	2.8571e+06	3.08223e+06	2.7261e+06	2.81097e+06	3.22148e+06	3.01245e+06	3.4633e+06	3.25962e+06	3.51213e+06
Q8BLK3	Limbic system-associated membrane protein [OS=Mus musculus]	Lsamp	1.12069e+08	9.75352e+07	1.09402e+08	8.89514e+07	9.66314e+07	111533973	8.84882e+07	1.06927e+08	1.16204e+08	1.24266e+08	1.15187e+08	1.27562e+08
Q60780	Growth arrest-specific protein 7 [OS=Mus musculus]	Gas7	1.06993e+07	1.13144e+07	1.06501e+07	1.06069e+07	9.19055e+06	1.18885e+07	1.03204e+07	1.06825e+07	1.25854e+07	1.32628e+07	1.11214e+07	1.74001e+07
P32921	Tryptophan--tRNA ligase, cytoplasmic [OS=Mus musculus]	Wars1	3.82457e+06	4.21907e+06	3.83939e+06	4.44759e+06	4.58757e+06	4.75551e+06	4.72095e+06	4.71324e+06	4.32539e+06	4.90289e+06	5.1365e+06	4.72329e+06
Q8BGT8	Phytanoyl-CoA hydroxylase-interacting protein-like [OS=Mus musculus]	Phyhipl	9.50467e+06	1.23634e+07	1.13882e+07	9.90108e+06	1.23932e+07	1.13449e+07	1.2073e+07	1.111e+07	1.46091e+07	1.4252e+07	1.51278e+07	1.36423e+07
Q8R071	Inositol-trisphosphate 3-kinase A [OS=Mus musculus]	Itpka	9.61047e+06	1.09255e+07	9.03612e+06	8.72425e+06	8.12237e+06	7.60759e+06	7.37174e+06	9.06824e+06	9.55669e+06	9.70699e+06	9.57008e+06	9.47561e+06
Q6PHN9	Ras-related protein Rab-35 [OS=Mus musculus]	Rab35	1.78746e+07	1.64574e+07	1.7099e+07	1.55123e+07	1.71177e+07	1.65376e+07	1.78848e+07	1.68198e+07	1.82989e+07	1.87206e+07	1.56268e+07	1.82859e+07
Q64514	Tripeptidyl-peptidase 2 [OS=Mus musculus]	Tpp2	6.40927e+06	8.45097e+06	6.94089e+06	8.14027e+06	7.46567e+06	6.99664e+06	7.43262e+06	6.96131e+06	7.09455e+06	6.71797e+06	6.37713e+06	5.79566e+06
P61979	Heterogeneous nuclear ribonucleoprotein K [OS=Mus musculus]	Hnrnpk	1.21454e+07	1.07872e+07	1.15881e+07	1.04328e+07	1.24789e+07	1.50997e+07	1.57385e+07	1.2167e+07	1.00014e+07	9.97908e+06	9.79383e+06	8.2976e+06
Q9D8W5	26S proteasome non-ATPase regulatory subunit 12 [OS=Mus musculus]	Psmd12	3.87429e+06	7.80298e+06	4.45368e+06	3.85688e+06	3.92372e+06	3.56417e+06	4.6567e+06	4.26099e+06	4.16653e+06	4.24939e+06	3.66397e+06	3.86163e+06
Q8JZW4	Copine-5 [OS=Mus musculus]	Cpne5	8.89839e+06	7.72711e+06	5.67717e+06	1.01696e+07	6.75842e+06	9.17011e+06	8.59174e+06	1.00005e+07	7.94844e+06	6.97032e+06	6.80765e+06	9.6028e+06
B9EKR1	Receptor-type tyrosine-protein phosphatase zeta [OS=Mus musculus]	Ptprz1	2.18348e+07	2.31223e+07	2.07087e+07	1.71493e+07	2.1173e+07	2.29489e+07	1.88784e+07	1.74301e+07	1.92148e+07	2.52853e+07	1.8635e+07	2.26614e+07
Q8BH44	Coronin-2B [OS=Mus musculus]	Coro2b	4.4416e+07	4.57162e+07	4.23974e+07	4.60431e+07	4.84367e+07	4.87575e+07	4.45733e+07	3.95809e+07	5.29881e+07	4.50937e+07	4.22429e+07	4.21475e+07
P48758	Carbonyl reductase [NADPH] 1 [OS=Mus musculus]	Cbr1	8.90085e+07	8.67384e+07	7.00204e+07	9.05822e+07	8.77453e+07	9.50746e+07	7.81494e+07	8.74598e+07	7.68951e+07	7.40431e+07	6.87204e+07	8.07211e+07
Q9DCT2	NADH dehydrogenase [ubiquinone] iron-sulfur protein 3, mitochondrial [OS=Mus musculus]	Ndufs3	1.91241e+07	2.30719e+07	2.10694e+07	2.15363e+07	2.03496e+07	1.66124e+07	2.12441e+07	2.03818e+07	1.7466e+07	1.77645e+07	2.25688e+07	2.03193e+07
Q80XN0	D-beta-hydroxybutyrate dehydrogenase, mitochondrial [OS=Mus musculus]	Bdh1	1.88696e+07	1.87325e+07	1.62886e+07	1.82609e+07	1.76614e+07	1.15068e+07	1.71454e+07	1.70144e+07	1.42291e+07	1.48724e+07	1.95874e+07	1.65135e+07
P09528	Ferritin heavy chain [OS=Mus musculus]	Fth1	1.5516e+07	1.51671e+07	1.51492e+07	1.58971e+07	2.04256e+07	1.63337e+07	1.99794e+07	1.66043e+07	1.12313e+07	9.67031e+06	7.90783e+06	1.38718e+07
Q91VI7	Ribonuclease inhibitor [OS=Mus musculus]	Rnh1	2.71095e+07	2.41211e+07	2.48309e+07	2.45533e+07	2.51147e+07	2.57493e+07	2.67564e+07	2.52415e+07	2.14316e+07	2.22076e+07	1.82378e+07	2.18157e+07
Q3THK7	GMP synthase [glutamine-hydrolyzing] [OS=Mus musculus]	Gmps	5.44036e+06	4.9599e+06	4.20684e+06	5.0327e+06	5.07863e+06	5.29293e+06	5.14664e+06	5.30444e+06	5.12713e+06	5.55594e+06	5.42797e+06	5.93869e+06
Q8R001	Microtubule-associated protein RP/EB family member 2 [OS=Mus musculus]	Mapre2	1.6002e+07	1.51443e+07	1.50051e+07	1.56716e+07	1.64909e+07	1.93856e+07	1.51481e+07	14146956	1.79419e+07	1.67213e+07	1.7104e+07	1.62363e+07
P50247	Adenosylhomocysteinase [OS=Mus musculus]	Ahcy	6.42216e+06	7.28307e+06	6.90392e+06	6.99712e+06	7.8394e+06	8.16789e+06	8.30547e+06	8.25839e+06	7.97494e+06	7.81437e+06	7.67609e+06	7.15774e+06
Q8R464	Cell adhesion molecule 4 [OS=Mus musculus]	Cadm4	1.41845e+07	1.20309e+07	1.3154e+07	1.1563e+07	1.34097e+07	1.31122e+07	1.28899e+07	1.14713e+07	1.28065e+07	1.20191e+07	1.11076e+07	1.14103e+07
Q8K021	Secretory carrier-associated membrane protein 1 [OS=Mus musculus]	Scamp1	1.94068e+07	1.83089e+07	2.00967e+07	1.68274e+07	1.87648e+07	1.78548e+07	2.01552e+07	1.74558e+07	2.22644e+07	1.95121e+07	2.48036e+07	1.91311e+07
Q7TMY8	E3 ubiquitin-protein ligase HUWE1 [OS=Mus musculus]	Huwe1	1.04695e+06	1.10486e+06	836348	868466	789564	998499	1.22147e+06	988667	1.63034e+06	1.31216e+06	1.12251e+06	1.66664e+06
Q80TK0	AP2-interacting clathrin-endocytosis protein [OS=Mus musculus]		5.10961e+06	5.22237e+06	5.63534e+06	5.85872e+06	5.91272e+06	4.92853e+06	5.87647e+06	5.07312e+06	4.84103e+06	5.01358e+06	6.19069e+06	4.71439e+06
Q8C754	Vacuolar protein sorting-associated protein 52 homolog [OS=Mus musculus]	Vps52	1.78003e+06	1.99409e+06	1.91391e+06	1.93033e+06	1.91269e+06	1.52968e+06	1.9778e+06	2.30167e+06	1.84523e+06	1.89256e+06	1.77015e+06	2.21549e+06
P59999	Actin-related protein 2/3 complex subunit 4 [OS=Mus musculus]	Arpc4	3.20554e+07	3.18529e+07	2.98449e+07	2.79082e+07	2.86623e+07	2.8113e+07	2.76624e+07	2.87023e+07	3.36636e+07	3.32111e+07	3.39075e+07	3.41424e+07
P99029	Peroxiredoxin-5, mitochondrial [OS=Mus musculus]	Prdx5	1.01615e+08	9.28688e+07	8.92719e+07	9.82756e+07	8.44719e+07	8.07014e+07	8.51409e+07	1.00163e+08	8.83715e+07	8.22566e+07	1.05739e+08	9.44036e+07
Q9CWJ9	Bifunctional purine biosynthesis protein ATIC [OS=Mus musculus]	Atic	6.45787e+06	6.27658e+06	6.57032e+06	6.0051e+06	6.49095e+06	5.46731e+06	7.97775e+06	6.96723e+06	6.57977e+06	7.06211e+06	7.02252e+06	6.40795e+06
Q99LG2	Transportin-2 [OS=Mus musculus]	Tnpo2	2.88886e+06	3.01227e+06	2.8646e+06	3.15942e+06	2.56069e+06	2.8342e+06	2.83692e+06	3.32022e+06	2.68599e+06	2.8041e+06	3.00503e+06	2.79057e+06
A2AQ25	Sickle tail protein [OS=Mus musculus]	Skt	6.22281e+06	6.8388e+06	6.26461e+06	5.84259e+06	5.38905e+06	4.95501e+06	5.94627e+06	5.53191e+06	7.08935e+06	7.57213e+06	6.95031e+06	7.07339e+06
Q9QUI0	Transforming protein RhoA [OS=Mus musculus]	Rhoa	2.28222e+07	1.97553e+07	1.79926e+07	2.08484e+07	1.95436e+07	2.50071e+07	2.34045e+07	2.32446e+07	2.52006e+07	2.49211e+07	2.06284e+07	2.51757e+07
Q8BLF1	Neutral cholesterol ester hydrolase 1 [OS=Mus musculus]	Nceh1	1.25029e+07	12279567	1.33021e+07	1.55761e+07	1.33967e+07	1.52731e+07	1.46243e+07	1.39419e+07	1.22111e+07	1.22037e+07	1.33518e+07	1.16367e+07
Q8BVQ5	Protein phosphatase methylesterase 1 [OS=Mus musculus]	Ppme1	1.19556e+07	1.28198e+07	1.19574e+07	1.36533e+07	1.11381e+07	1.19549e+07	1.22824e+07	1.50746e+07	1.1797e+07	1.07609e+07	1.13287e+07	1.45187e+07
Q640R3	Hepatocyte cell adhesion molecule [OS=Mus musculus]	Hepacam	1.83229e+07	1.67951e+07	1.71978e+07	1.62254e+07	1.92299e+07	2.12066e+07	1.84097e+07	1.87921e+07	1.96288e+07	2.00286e+07	2.03068e+07	1.99551e+07
P19246	Neurofilament heavy polypeptide [OS=Mus musculus]	Nefh	8.37572e+06	7.38761e+06	9.34606e+06	6.55247e+06	7.101e+06	5.45839e+06	7.14355e+06	5.50833e+06	4.88749e+06	5.52567e+06	6.65002e+06	7.14096e+06
P46471	26S proteasome regulatory subunit 7 [OS=Mus musculus]	Psmc2	1.43425e+07	1.75266e+07	1.80709e+07	1.56143e+07	1.37897e+07	1.68223e+07	1.48843e+07	1.55338e+07	1.99986e+07	1.9233e+07	1.8983e+07	1.80007e+07
P62484	Abl interactor 2 [OS=Mus musculus]	Abi2	1.07358e+07	1.10884e+07	1.12432e+07	1.01318e+07	9.86528e+06	1.16369e+07	1.02234e+07	1.16253e+07	1.3009e+07	1.2428e+07	1.26101e+07	1.35737e+07
Q99JR1	Sideroflexin-1 [OS=Mus musculus]	Sfxn1	4.74308e+06	5.53435e+06	5.15537e+06	6.26583e+06	5.02934e+06	3.69738e+06	5.29892e+06	5.32151e+06	5.022e+06	5.65559e+06	6.69e+06	5.67571e+06
P54775	26S proteasome regulatory subunit 6B [OS=Mus musculus]	Psmc4	4.24892e+06	4.18811e+06	3.41795e+06	3.95047e+06	4.16007e+06	4.4958e+06	4.94021e+06	4.17084e+06	4.97925e+06	4.74379e+06	4.23883e+06	4.71572e+06
Q02257	Junction plakoglobin [OS=Mus musculus]	Jup	954715	583281	531173	313508	485447	678907	1.2846e+06	822924	1.04149e+06	767670	732287	780906
P60904	DnaJ homolog subfamily C member 5 [OS=Mus musculus]	Dnajc5	6.92636e+07	6.79726e+07	7.41318e+07	7.14001e+07	6.03071e+07	7.1296e+07	6.52329e+07	6.95999e+07	6.93686e+07	7.04304e+07	6.87665e+07	6.89372e+07
Q60598	Src substrate cortactin [OS=Mus musculus]	Cttn	2.04872e+07	1.94864e+07	1.86982e+07	1.93989e+07	1.67235e+07	1.96174e+07	1.91548e+07	1.50338e+07	2.3149e+07	2.24286e+07	2.66696e+07	2.30871e+07
P12023	Amyloid-beta precursor protein [OS=Mus musculus]	App	1.33157e+07	1.25834e+07	1.23875e+07	1.15214e+07	1.34557e+07	1.29394e+07	1.30233e+07	1.17789e+07	8.2183e+06	8.22735e+06	9.83202e+06	8.10076e+06
P63141	Potassium voltage-gated channel subfamily A member 2 [OS=Mus musculus]	Kcna2	2.14095e+07	1.7429e+07	2.10764e+07	2.25781e+07	2.17022e+07	1.85538e+07	1.85275e+07	2.1064e+07	1.75664e+07	1.4549e+07	1.42995e+07	1.64598e+07
Q9JII6	Aldo-keto reductase family 1 member A1 [OS=Mus musculus]	Akr1a1	1.42701e+07	1.53254e+07	1.45226e+07	1.45242e+07	1.46298e+07	1.59509e+07	1.48347e+07	1.52566e+07	1.45964e+07	1.63048e+07	1.56297e+07	1.43592e+07
Q9R0P5	Destrin [OS=Mus musculus]	Dstn	3.71911e+07	3.9961e+07	3.97735e+07	3.67293e+07	3.77557e+07	4.60393e+07	4.44622e+07	3.61348e+07	4.25332e+07	3.87114e+07	4.30924e+07	3.45466e+07
Q99LX0	Parkinson disease protein 7 homolog [OS=Mus musculus]	Park7	2.0054e+07	2.28483e+07	1.98791e+07	1.97061e+07	2.0251e+07	2.38769e+07	2.23345e+07	1.99597e+07	2.66876e+07	2.334e+07	2.91726e+07	2.45014e+07
Q9DBF1	Alpha-aminoadipic semialdehyde dehydrogenase [OS=Mus musculus]	Aldh7a1	5.55774e+06	5.59507e+06	5.59173e+06	6.20451e+06	5.2778e+06	5.67474e+06	5.3593e+06	5.41352e+06	7.89438e+06	7.90194e+06	8.39314e+06	8.11974e+06
P35803	Neuronal membrane glycoprotein M6-b [OS=Mus musculus]	Gpm6b	9.76137e+07	9.07025e+07	8.30801e+07	8.38252e+07	7.70278e+07	9.50121e+07	8.24023e+07	8.94978e+07	1.00915e+08	1.02442e+08	8.41782e+07	9.88207e+07
O88685	26S proteasome regulatory subunit 6A [OS=Mus musculus]	Psmc3	5.65467e+06	5.75118e+06	5.80349e+06	5.78077e+06	5.94855e+06	5.87254e+06	6.56369e+06	6.19202e+06	5.5238e+06	6.07166e+06	5.3283e+06	5.32823e+06
Q99MK8	Beta-adrenergic receptor kinase 1 [OS=Mus musculus]	Grk2	3.24742e+06	4.0541e+06	3.32588e+06	3.15056e+06	3.06601e+06	3.8633e+07	4.82366e+06	2.81858e+07	3.79803e+06	4.80168e+06	4.46287e+06	3.91021e+06
Q9WV60	Glycogen synthase kinase-3 beta [OS=Mus musculus]	Gsk3b	1.0937e+07	1.03792e+07	1.13875e+07	8.85446e+06	1.02288e+07	8.91219e+06	9.35831e+06	1.08869e+07	1.03243e+07	1.01632e+07	1.15467e+07	1.35112e+07
Q9DB20	ATP synthase subunit O, mitochondrial [OS=Mus musculus]	Atp5po	2.53867e+07	2.96305e+07	2.65719e+07	3.35785e+07	2.90556e+07	1.60515e+07	2.65184e+07	2.84208e+07	2.58884e+07	2.43903e+07	3.68274e+07	3.59129e+07
Q99PL6	UBX domain-containing protein 6 [OS=Mus musculus]	Ubxn6	6.55839e+06	7.24283e+06	6.64795e+06	7.1482e+06	6.96798e+06	6.83168e+06	5.69361e+06	6.93327e+06	7.88692e+06	7.30459e+06	6.71761e+06	8.86006e+06
O08914	Fatty-acid amide hydrolase 1 [OS=Mus musculus]	Faah	4.68696e+06	3.94769e+06	3.13176e+06	4.43554e+06	4.3063e+06	4.32221e+06	3.57376e+06	4.24552e+06	3.32817e+06	4.00537e+06	3.55731e+06	4.08145e+06
Q9CQW2	ADP-ribosylation factor-like protein 8B [OS=Mus musculus]	Arl8b	2.87916e+07	3.13645e+07	2.59066e+07	2.74443e+07	3.52514e+07	2.9251e+07	3.61916e+07	4.00472e+07	2.70586e+07	2.59773e+07	2.75517e+07	2.72628e+07
Q5SYD0	Unconventional myosin-Id [OS=Mus musculus]	Myo1d	6.6441e+06	5.59644e+06	6.07741e+06	6.94883e+06	8.0857e+06	6.80308e+06	6.87095e+06	6.24097e+06	4.50532e+06	5.64393e+06	4.85523e+06	4.67111e+06
P08226	Apolipoprotein E [OS=Mus musculus]	Apoe	1.20983e+07	1.23392e+07	1.05966e+07	1.06823e+07	2.0055e+07	2.2343e+07	2.05499e+07	2.38614e+07	1.05899e+07	1.08088e+07	1.17106e+07	9.3441e+06
O35954	Membrane-associated phosphatidylinositol transfer protein 1 [OS=Mus musculus]	Pitpnm1	3.52404e+06	3.7222e+06	3.50422e+06	3.44302e+06	2.49145e+06	4.00543e+06	3.58205e+06	3.48896e+06	4.03766e+06	2.80354e+06	3.51399e+06	4.30079e+06
Q60930	Voltage-dependent anion-selective channel protein 2 [OS=Mus musculus]	Vdac2	1.001e+08	1.09756e+08	1.09642e+08	116587433	1.06754e+08	7.66228e+07	1.00718e+08	1.08401e+08	8.52264e+07	8.42698e+07	1.17624e+08	1.1729e+08
P01831	Thy-1 membrane glycoprotein [OS=Mus musculus]	Thy1	3.83018e+08	3.86369e+08	3.99291e+08	4.10929e+08	3.88215e+08	4.79919e+08	3.83964e+08	4.3231e+08	4.66127e+08	4.35088e+08	3.91552e+08	4.4884e+08
P26883	Peptidyl-prolyl cis-trans isomerase FKBP1A [OS=Mus musculus]	Fkbp1a	1.44341e+07	1.52136e+07	1.13435e+07	1.27769e+07	1.18658e+07	1.28523e+07	1.19462e+07	1.37739e+07	1.47283e+07	1.73822e+07	1.60487e+07	1.67826e+07
Q8BU31	Ras-related protein Rap-2c [OS=Mus musculus]	Rap2c	2.00524e+06	1.66501e+06	1.59898e+06	1.47405e+06	1913309	3.61451e+06	1.84098e+06	1.57596e+06	1.88834e+06	1.98408e+06	1.81742e+06	1.4214e+06
P61021	Ras-related protein Rab-5B [OS=Mus musculus]	Rab5b	9.46211e+06	8.55492e+06	9.2452e+06	1.01681e+07	8.82963e+06	7.37457e+06	9.3382e+06	9.31011e+06	1.03028e+07	9.65401e+06	1.00986e+07	9.65436e+06
Q9CPV4	Glyoxalase domain-containing protein 4 [OS=Mus musculus]	Glod4	1.00238e+07	1.03715e+07	1.00768e+07	1.07477e+07	9.92804e+06	9.96771e+06	9.9013e+06	9.27236e+06	8.24139e+06	9.2315e+06	1.04147e+07	9.47017e+06
Q80WG5	Volume-regulated anion channel subunit LRRC8A [OS=Mus musculus]	Lrrc8a	3.45789e+06	4.2244e+06	3.89591e+06	4.25679e+06	4.20577e+06	4.22486e+06	4.14506e+06	3.92112e+06	4.42804e+06	3.61414e+06	3.76903e+06	4.01606e+06
P32261	Antithrombin-III [OS=Mus musculus]	Serpinc1	5.29147e+06	7.77446e+06	3.54728e+06	6.37096e+06	7.21118e+06	5.31925e+06	7.15682e+06	6.02667e+06	150829
P47809	Dual specificity mitogen-activated protein kinase kinase 4 [OS=Mus musculus]	Map2k4	7.56773e+06	7.83384e+06	6.98954e+06	6.71398e+06	7.63639e+06	6.57863e+06	7.66856e+06	8.07806e+06	7.63454e+06	7.36755e+06	7.63868e+06	8.04822e+06
O55017	Voltage-dependent N-type calcium channel subunit alpha-1B [OS=Mus musculus]	Cacna1b	3.64326e+06	3.79342e+06	3.52302e+06	3.49304e+06	3.18552e+06	2.21576e+06	3.15555e+06	3.59725e+06	2.95703e+06	3.82384e+06	3.40432e+06	3.80054e+06
B2RXS4	Plexin-B2 [OS=Mus musculus]	Plxnb2	2.53258e+06	3.05194e+06	2.12535e+06	2.10101e+06	3.27604e+06	4.36753e+06	4.76039e+06	4.68808e+06	4.22264e+06	3.81192e+06	3.28573e+06	3.81476e+06
Q8VHH5	Arf-GAP with GTPase, ANK repeat and PH domain-containing protein 3 [OS=Mus musculus]	Agap3	7.27094e+06	8.4919e+06	7.78411e+06	6.89116e+06	6.50677e+06	6.39841e+06	6.87224e+06	6.29579e+06	9.43873e+06	9.64249e+06	9.07586e+06	9.69446e+06
Q91Z67	SLIT-ROBO Rho GTPase-activating protein 2 [OS=Mus musculus]	Srgap2	3.43169e+06	3.44267e+06	4.88697e+06	3.97229e+06	2.98843e+06	5.45373e+06	3.47584e+06	3.05712e+06	5.32787e+06	5.09749e+06	4.35509e+06	4.88871e+06
Q99PJ0	Neurotrimin [OS=Mus musculus]	Ntm	1.70675e+08	1.57784e+08	1.70322e+08	1.29672e+08	1.36072e+08	189246558	1.34425e+08	1.66256e+08	1.37247e+08	1.628e+08	1.18835e+08	1.5011e+08
Q60676	Serine/threonine-protein phosphatase 5 [OS=Mus musculus]	Ppp5c	9.32837e+06	9.98495e+06	8.87802e+06	9.58197e+06	1.00247e+07	9.54093e+06	9.80689e+06	8.28138e+06	1.01646e+07	9.09083e+06	9.96838e+06	9.53826e+06
O70252	Heme oxygenase 2 [OS=Mus musculus]	Hmox2	6.53762e+06	5.7983e+06	6.39071e+06	5.88774e+06	6.4407e+06	6.24825e+06	7.24986e+06	6.37538e+06	5.60224e+06	6.11683e+06	6.64791e+06	6.05785e+06
Q9D8N0	Elongation factor 1-gamma [OS=Mus musculus]	Eef1g	1.44041e+07	1.53484e+07	1.67385e+07	1.56054e+07	1.52773e+07	1.69336e+07	1.73087e+07	1.71137e+07	1.53885e+07	1.48013e+07	1.5354e+07	1.60489e+07
Q811P8	Rho GTPase-activating protein 32 [OS=Mus musculus]	Arhgap32	5.17116e+06	4.74133e+06	5.54525e+06	5.43818e+06	4.12057e+06	3.67492e+06	4.82183e+06	4.39713e+06	6.20821e+06	5.32438e+06	5.43286e+06	5.93564e+06
Q91VR2	ATP synthase subunit gamma, mitochondrial [OS=Mus musculus]	Atp5f1c	4.85904e+07	5.41745e+07	5.2397e+07	5.89712e+07	5.05402e+07	3.75873e+07	5.31038e+07	4.9308e+07	4.01877e+07	4.41208e+07	5.85843e+07	4.92278e+07
Q80X80	Phospholipid transfer protein C2CD2L [OS=Mus musculus]	C2cd2l	4.74081e+06	4.56313e+06	5.02569e+06	4.6073e+06	3.97495e+06	3.59836e+06	4.18468e+06	4.32368e+06	5.56006e+06	5.19253e+06	6.91441e+06	5.77545e+06
Q7TPM6	Fibronectin type III and SPRY domain-containing protein 1 [OS=Mus musculus]	Fsd1	8.2111e+06	7.45966e+06	7.47055e+06	6.83363e+06	8.14646e+06	7.78707e+06	7.45025e+06	6.89635e+06	8.85802e+06	7.50738e+06	7.34291e+06	7.26993e+06
P03911	NADH-ubiquinone oxidoreductase chain 4 [OS=Mus musculus]	Mtnd4	2.52202e+06	2.97669e+06	2.88069e+06	3.50423e+06	2.47243e+06	1.54897e+06	2.369e+06	4.34357e+06	3.49462e+06	2.95592e+06	2.7813e+06	3.40933e+06
P45376	Aldo-keto reductase family 1 member B1 [OS=Mus musculus]	Akr1b1	2.36241e+07	2.45891e+07	2.49576e+07	2.68767e+07	2.61718e+07	2.50047e+07	2.68691e+07	2.78941e+07	2.4003e+07	2.42413e+07	2.66306e+07	2.53157e+07
Q6P5E4	UDP-glucose:glycoprotein glucosyltransferase 1 [OS=Mus musculus]	Uggt1	2.04309e+06	2.11303e+06	2.30445e+06	1.8287e+06	2.3082e+06	1.83176e+06	3.0599e+06	2.37645e+06	1.86346e+06	2.00512e+06	1.87394e+06	2.0776e+06
Q9D8Y0	EF-hand domain-containing protein D2 [OS=Mus musculus]	Efhd2	4.3876e+07	3.45207e+07	4.71162e+07	4.34885e+07	5.53823e+07	6.17413e+07	6.31103e+07	3.7756e+07	3.52901e+07	4.10805e+07	4.50519e+07	3.98294e+07
Q9ES28	Rho guanine nucleotide exchange factor 7 [OS=Mus musculus]	Arhgef7	6.61829e+06	5.70748e+06	6.50255e+06	5.89786e+06	6.19802e+06	6.65951e+06	6.54184e+06	5.77101e+06	6.69735e+06	7.33271e+06	6.9453e+06	6.37008e+06
P36916	Guanine nucleotide-binding protein-like 1 [OS=Mus musculus]	Gnl1	4.28894e+06	4.96912e+06	4.43338e+06	5.24947e+06	4.67286e+06	4.63571e+06	4.50763e+06	5.05265e+06	4.79242e+06	4.76035e+06	4.65656e+06	5.08234e+06
O88712	C-terminal-binding protein 1 [OS=Mus musculus]	Ctbp1	2.4203e+07	2.45078e+07	2.42499e+07	2.56012e+07	2.29377e+07	2.55291e+07	2.39447e+07	2.32631e+07	2.22689e+07	2.50195e+07	2.67221e+07	2.28856e+07
Q7TNR6	Immunoglobulin superfamily member 21 [OS=Mus musculus]	Igsf21	6.37198e+06	7.36798e+06	7.02317e+06	6.76461e+06	7.66567e+06	7.42711e+06	5.963e+06	6.66779e+06	1.08777e+07	1.02561e+07	8.50894e+06	8.53822e+06
Q60996	Serine/threonine-protein phosphatase 2A 56 kDa regulatory subunit gamma isoform [OS=Mus musculus]	Ppp2r5c	3.47585e+06	3.02282e+06	3.05778e+06	3.42078e+06	2.72228e+06	2.67596e+06	2.87839e+06	3.83535e+06	4.44768e+06	3.80852e+06	3.52396e+06	4.27321e+06
P17742	Peptidyl-prolyl cis-trans isomerase A [OS=Mus musculus]	Ppia	279615350	2.68716e+08	2.70771e+08	2.54246e+08	2.60963e+08	2.82041e+08	2.47717e+08	2.75746e+08	2.94689e+08	2.9387e+08	2.78413e+08	2.69499e+08
P63082	V-type proton ATPase 16 kDa proteolipid subunit c [OS=Mus musculus]	Atp6v0c	9.05763e+06	1.41346e+07	1.47482e+07	1.13575e+07	1.15404e+07	1.06396e+07	9.73675e+06	2.69988e+07	2.39617e+07	1.43111e+07	1.78973e+07	2.20205e+07
Q9WTX5	S-phase kinase-associated protein 1 [OS=Mus musculus]	Skp1	1.16617e+07	1.02146e+07	9.72302e+06	1.03324e+07	1.0024e+07	9.31085e+06	9.89225e+06	8.00636e+06	9.90434e+06	9.8838e+06	8.5906e+06	9.83273e+06
Q99LR1	Lysophosphatidylserine lipase ABHD12 [OS=Mus musculus]	Abhd12	7.1064e+06	7.39467e+06	7.59442e+06	8.17796e+06	8.36064e+06	7.55771e+06	9.76891e+06	8.9074e+06	5.47886e+06	5.62347e+06	6.98409e+06	6.52447e+06
P63080	Gamma-aminobutyric acid receptor subunit beta-3 [OS=Mus musculus]	Gabrb3	1.2046e+07	1.10513e+07	9.49033e+06	1.14861e+07	1.22352e+07	1.12313e+07	1.01122e+07	1.52474e+07	1.46916e+07	1.34487e+07	1.49467e+07	1.71919e+07
Q8CBW3	Abl interactor 1 [OS=Mus musculus]	Abi1	3.12738e+07	3.13758e+07	3.1088e+07	2.8862e+07	2.88432e+07	3.28059e+07	3.22143e+07	2.86161e+07	3.72473e+07	3.35233e+07	3.86895e+07	3.28601e+07
P39447	Tight junction protein ZO-1 [OS=Mus musculus]	Tjp1	2.66204e+06	2.44287e+06	2.69014e+06	2.17949e+06	2.9815e+06	3.18448e+06	3.48732e+06	3.48611e+06	2.39339e+06	2.41857e+06	2.85707e+06	2.8483e+06
Q6WQJ1	Diacylglycerol lipase-alpha [OS=Mus musculus]	Dagla	3.3032e+06	3.33668e+06	2.29312e+06	2.65256e+06	3.10615e+06	3.13658e+06	3.22234e+06	2.41877e+06	1.77412e+06	1.67481e+06	2.11504e+06	1.76218e+06
Q7TME0	Phospholipid phosphatase-related protein type 4 [OS=Mus musculus]	Plppr4	8.1327e+06	9.86925e+06	8.93824e+06	9.19811e+06	7.68871e+06	1.00194e+07	8.22722e+06	8.54858e+06	1.0916e+07	1.11893e+07	1.03879e+07	1.11439e+07
P83510	Traf2 and NCK-interacting protein kinase [OS=Mus musculus]	Tnik	2.55864e+06	3.07362e+06	2.31436e+06	2.89782e+06	2.43877e+06	2.5741e+06	2.34033e+06	1.96047e+06	2.9898e+06	3.91157e+06	2.92736e+06	4.04791e+06
P63321	Ras-related protein Ral-A [OS=Mus musculus]	Rala	1.53064e+07	1.78267e+07	14759639	1.56469e+07	1.57342e+07	1.33937e+07	1.47452e+07	1.45931e+07	1.68391e+07	1.61226e+07	1.75048e+07	2.04728e+07
P04919	Band 3 anion transport protein [OS=Mus musculus]	Slc4a1	4.25931e+06	6.95009e+06	8.66633e+06	7.6233e+06	5.67719e+06	3.8904e+06	8.74477e+06	9.19343e+06	1.53749e+06	1.41857e+06	1.85498e+06	1.37657e+06
Q922D8	C-1-tetrahydrofolate synthase, cytoplasmic [OS=Mus musculus]	Mthfd1	4.00729e+06	5.40795e+06	3.74922e+06	4.07453e+06	4.18506e+06	4.14571e+06	4.46438e+06	5.49215e+06	5.96362e+06	4.51027e+06	3.83232e+06	5.87944e+06
P01942	Hemoglobin subunit alpha [OS=Mus musculus]	Hba	6.32499e+08	8.35606e+08	7.8346e+08	8.06693e+08	7.73591e+08	8.60431e+08	8.32417e+08	9.4639e+08	1.5672e+08	1.50001e+08	6.38831e+07	4.95368e+07
Q8BHE3	Caytaxin [OS=Mus musculus]	Atcay	14613575	1.51837e+07	1.20282e+07	1.5614e+07	1.50789e+07	1.61092e+07	1.33528e+07	1.39351e+07	1.55342e+07	1.42181e+07	1.59817e+07	1.49905e+07
Q99LI8	Hepatocyte growth factor-regulated tyrosine kinase substrate [OS=Mus musculus]	Hgs	4.87999e+06	4.10379e+06	4.05636e+06	3.40869e+06	4.3232e+06	4.5425e+06	5.07094e+06	4.14142e+06	5.30041e+06	5.41888e+06	4.35485e+06	3.75618e+06
P16388	Potassium voltage-gated channel subfamily A member 1 [OS=Mus musculus]	Kcna1	4.61944e+06	4.91169e+06	5.12046e+06	5.04084e+06	5.44589e+06	5.3783e+06	4.6826e+06	5.34926e+06	3.51007e+06	3.51858e+06	2.75415e+06	2.7572e+06
Q9DBR7	Protein phosphatase 1 regulatory subunit 12A [OS=Mus musculus]	Ppp1r12a	6.14824e+06	6.29735e+06	5.17851e+06	5.77205e+06	5.65498e+06	5.11878e+06	6.51786e+06	6.15251e+06	6.10805e+06	5.92943e+06	6.8645e+06	6.91045e+06
Q8BKZ9	Pyruvate dehydrogenase protein X component, mitochondrial [OS=Mus musculus]	Pdhx	9.20226e+06	1.03932e+07	7797168	9.77481e+06	8.39172e+06	7.65028e+06	8.63607e+06	8.41667e+06	7.18322e+06	8.64584e+06	8.75134e+06	9.79285e+06
Q5DTY9	BTB/POZ domain-containing protein KCTD16 [OS=Mus musculus]	Kctd16	1.68428e+07	1.38552e+07	1.57854e+07	1.45358e+07	1.34778e+07	1.58935e+07	1.47377e+07	1.66601e+07	1.47214e+07	1.48425e+07	1.57048e+07	1.57104e+07
O88990	Alpha-actinin-3 [OS=Mus musculus]	Actn3
O89112	Glutathione S-transferase LANCL1 [OS=Mus musculus]	Lancl1	1.12289e+07	1.14244e+07	9.99089e+06	1.10848e+07	1.22147e+07	1.08817e+07	1.24609e+07	1.16162e+07	1.41061e+07	1.25144e+07	1.16702e+07	1.18708e+07
P32883	GTPase KRas [OS=Mus musculus]	Kras	3.27612e+06	3.36684e+06	3.07882e+06	3.26804e+06	3.60084e+06	4.06778e+06	3.67231e+06	3.14561e+06	3.16439e+06	3.61423e+06	3.05097e+06	3.28175e+06
Q91V12	Cytosolic acyl coenzyme A thioester hydrolase [OS=Mus musculus]	Acot7	6.83323e+07	7.02604e+07	7.06892e+07	7.72151e+07	6.84348e+07	7.65939e+07	7.84701e+07	6.07592e+07	7.72333e+07	7.77279e+07	7.94942e+07	6.42143e+07
Q78ZA7	Nucleosome assembly protein 1-like 4 [OS=Mus musculus]	Nap1l4	8.80064e+06	9.98127e+06	1.00553e+07	9.52196e+06	9.98954e+06	1.13028e+07	8.57671e+06	8.89726e+06	1.07365e+07	1.00341e+07	1.07395e+07	9.74796e+06
Q9DC07	LIM zinc-binding domain-containing Nebulette [OS=Mus musculus]	Nebl	2.37161e+07	2.18985e+07	2.07674e+07	1.97262e+07	2.16336e+07	2.28107e+07	2.39776e+07	2.12387e+07	2.85631e+07	2.73667e+07	2.66285e+07	2.27961e+07
P08556	GTPase NRas [OS=Mus musculus]	Nras	823156	833931	848487	826287	887117	1.16951e+06	929929	951998	979232	977068	645446	980558
Q920Q4	Vacuolar protein sorting-associated protein 16 homolog [OS=Mus musculus]	Vps16	2.46328e+06	2.60527e+06	2.11273e+06	2.90357e+06	3.17744e+06	2.57545e+06	2.82986e+06	2.86753e+06	2.66688e+06	1.96977e+06	2.15457e+06	3.0121e+06
P62331	ADP-ribosylation factor 6 [OS=Mus musculus]	Arf6	1.33962e+07	1.14162e+07	1.12336e+07	1.15656e+07	1.23962e+07	1.40398e+07	1.18876e+07	1.38648e+07	1.18342e+07	1.17177e+07	1.10201e+07	1.26836e+07
Q91Z53	Glyoxylate reductase/hydroxypyruvate reductase [OS=Mus musculus]	Grhpr	5.8522e+06	5.8219e+06	5.69486e+06	6.31369e+06	6.09689e+06	6.22814e+06	6.68486e+06	6.22894e+06	6.52772e+06	5.57123e+06	5.79311e+06	5.55973e+06
P14685	26S proteasome non-ATPase regulatory subunit 3 [OS=Mus musculus]	Psmd3	7.95709e+06	7.82647e+06	6.76985e+06	7.22599e+06	8.84737e+06	7.19772e+06	7.74945e+06	8.37482e+06	8.64217e+06	7.91794e+06	6.63854e+06	8.82386e+06
Q8CGK3	Lon protease homolog, mitochondrial [OS=Mus musculus]	Lonp1	2.60017e+07	2.67356e+07	2.54365e+07	26628897	2.55653e+07	2.83228e+07	2.74054e+07	2.77293e+07	2.43988e+07	2.51944e+07	2.33202e+07	1.94246e+07
Q62095	ATP-dependent RNA helicase DDX3Y [OS=Mus musculus]	Ddx3y	43176.6	46599.8	87173	82394.3	71094	36141.8	34390.4	117603	104084	87505.4	75330.5	63248.2
O88456	Calpain small subunit 1 [OS=Mus musculus]	Capns1	5.20456e+06	5.02891e+06	4.16942e+06	4.36711e+06	5.06269e+06	4.32522e+06	4.47468e+06	4.83835e+06	4.97977e+06	5.48443e+06	5.15217e+06	4.50423e+06
P31650	Sodium- and chloride-dependent GABA transporter 3 [OS=Mus musculus]	Slc6a11	4.24183e+07	3.69459e+07	4.22536e+07	3.57226e+07	3.68187e+07	5.41693e+07	3.55407e+07	3.53944e+07	4.74214e+07	4.65889e+07	4.39137e+07	3.9886e+07
P84096	Rho-related GTP-binding protein RhoG [OS=Mus musculus]	Rhog	2.8497e+07	2.5714e+07	2.46686e+07	2.27646e+07	3.08289e+07	3.47439e+07	3.41258e+07	2.65221e+07	2.98167e+07	3.36214e+07	2.66799e+07	2.22774e+07
Q80TB8	Synaptic vesicle membrane protein VAT-1 homolog-like [OS=Mus musculus]	Vat1l	4.64339e+06	5.02518e+06	5.06151e+06	5.55307e+06	4.67076e+06	4.87955e+06	4.38568e+06	5.57512e+06	8.65089e+06	1.00804e+07	1.00662e+07	1.03463e+07
Q8CBY8	Dynactin subunit 4 [OS=Mus musculus]	Dctn4	4.5833e+06	4.13185e+06	2.79197e+06	4.37209e+06	5.72299e+06	5.12218e+06	5.67221e+06	6.56121e+06	5.64385e+06	4.32801e+06	5.10543e+06	5.9774e+06
P97390	Vacuolar protein sorting-associated protein 45 [OS=Mus musculus]	Vps45	1.10581e+07	1.20509e+07	1.2261e+07	1.07531e+07	1.21629e+07	1.2643e+07	1.30527e+07	1.21452e+07	1.2045e+07	1.27152e+07	1.32288e+07	1.07358e+07
P14231	Sodium/potassium-transporting ATPase subunit beta-2 [OS=Mus musculus]	Atp1b2	8.00047e+07	8.20228e+07	8.44536e+07	7.86062e+07	8.22078e+07	1.0491e+08	7.86747e+07	7.81134e+07	9.86552e+07	9.36335e+07	7.75188e+07	8.49341e+07
P62746	Rho-related GTP-binding protein RhoB [OS=Mus musculus]	Rhob	4.02092e+07	3.80674e+07	3.64527e+07	3.79753e+07	3.75307e+07	4.37752e+07	3.73745e+07	3.47978e+07	4.79292e+07	4.75813e+07	3.91391e+07	3.88176e+07
Q9JIW9	Ras-related protein Ral-B [OS=Mus musculus]	Ralb	1.85453e+07	1.36766e+07	1.61294e+07	1.37212e+07	1.47779e+07	1.55188e+07	1.62422e+07	1.67145e+07	1.59825e+07	1.67173e+07	1.49849e+07	1.70239e+07
Q9DCD0	6-phosphogluconate dehydrogenase, decarboxylating [OS=Mus musculus]	Pgd	6.38991e+06	7.35601e+06	5.74607e+06	8.07015e+06	9.71635e+06	9.87749e+06	9.74459e+06	9.81035e+06	6.00388e+06	6.2004e+06	6.54045e+06	4.85699e+06
Q80UJ7	Rab3 GTPase-activating protein catalytic subunit [OS=Mus musculus]	Rab3gap1	4.87551e+06	4.72566e+06	4.44295e+06	4.72209e+06	5.00716e+06	4.19888e+06	4.79346e+06	3.9779e+06	4.17055e+06	4.7535e+06	4.89805e+06	3.99847e+06
Q8BSS9	Liprin-alpha-2 [OS=Mus musculus]	Ppfia2	7.47584e+06	7.03147e+06	7.54784e+06	6.95668e+06	6.86741e+06	8.2175e+06	7.89743e+06	5.8754e+06	6.89477e+06	7.08881e+06	8.55654e+06	6.33614e+06
P26516	26S proteasome non-ATPase regulatory subunit 7 [OS=Mus musculus]	Psmd7	3.46842e+06	3.24685e+06	3.56673e+06	3.73528e+06	4.22543e+06	3.58068e+06	4.08358e+06	4.31927e+06	4.462e+06	3.78839e+06	3.86911e+06	4.49342e+06
Q8R574	Phosphoribosyl pyrophosphate synthase-associated protein 2 [OS=Mus musculus]	Prpsap2	8.87393e+06	1.00284e+07	8.60393e+06	9.7087e+06	9.50023e+06	1.08937e+07	9.00916e+06	1.01799e+07	1.02431e+07	1.06104e+07	1.10912e+07	1.12488e+07
P07356	Annexin A2 [OS=Mus musculus]	Anxa2	4.81606e+06	5.01592e+06	5.73687e+06	4.47302e+06	9.92387e+06	9.01617e+06	9.48757e+06	1.05408e+07	5.47212e+06	5.2324e+06	5.16119e+06	4.86496e+06
P60766	Cell division control protein 42 homolog [OS=Mus musculus]	Cdc42	4.68488e+07	3.80682e+07	4.60893e+07	3.95611e+07	5.16966e+07	4.5993e+07	4.88189e+07	3.93635e+07	4.99392e+07	4.19647e+07	4.68325e+07	4.0547e+07
O35250	Exocyst complex component 7 [OS=Mus musculus]	Exoc7	3.07432e+06	3.07391e+06	3.47748e+06	2.94503e+06	3.02141e+06	3.32614e+06	3.08058e+06	3.686e+06	3.64368e+06	3.87656e+06	3.29164e+06	3.31363e+06
Q8CFI0	E3 ubiquitin-protein ligase NEDD4-like [OS=Mus musculus]	Nedd4l	2.80534e+06	3.30262e+06	3.06272e+06	3.24033e+06	2.90535e+06	2.38586e+06	3.54982e+06	3.56243e+06	2.88227e+06	2.46039e+06	2.53886e+06	2.95255e+06
Q6PAK3	Protein arginine N-methyltransferase 8 [OS=Mus musculus]	Prmt8	3.23088e+07	2.86088e+07	3.02519e+07	2.99328e+07	3.11707e+07	3.13699e+07	3.44155e+07	3.2675e+07	3.25563e+07	2.58496e+07	2.98902e+07	2.2947e+07
Q99L43	Phosphatidate cytidylyltransferase 2 [OS=Mus musculus]	Cds2	1.05385e+07	1.11441e+07	1.16265e+07	1.05733e+07	9.58373e+06	1.0225e+07	1.0548e+07	1.12446e+07	1.12271e+07	9.56533e+06	1.21053e+07	1.16304e+07
Q8C729	Protein FAM126B [OS=Mus musculus]	Hycc2	1.09609e+07	9.9937e+06	1.06148e+07	1.02177e+07	9.83015e+06	1.21724e+07	1.08925e+07	1.07702e+07	1.28163e+07	1.05286e+07	1.05677e+07	9.75623e+06
Q91ZZ3	Beta-synuclein [OS=Mus musculus]	Sncb	5.83931e+07	6.60497e+07	6.89485e+07	6.36919e+07	6.10711e+07	6.85654e+07	5.16077e+07	5.62088e+07	9.01396e+07	7.65598e+07	7.3132e+07	7.80466e+07
Q05512	Serine/threonine-protein kinase MARK2 [OS=Mus musculus]	Mark2	7.75314e+06	8.0535e+06	7.62237e+06	8.08646e+06	7.45277e+06	7.49671e+06	7.29219e+06	7.27482e+06	8.14266e+06	7.95799e+06	8.46839e+06	8.12129e+06
Q60631	Growth factor receptor-bound protein 2 [OS=Mus musculus]	Grb2	1.55093e+07	1.45674e+07	1.27797e+07	1.25636e+07	1.21141e+07	1.36625e+07	1.50115e+07	1.26366e+07	1.65495e+07	1.55224e+07	1.75727e+07	1.48982e+07
Q8BHL5	Engulfment and cell motility protein 2 [OS=Mus musculus]	Elmo2	4.72738e+06	4.6453e+06	2.97999e+06	3.492e+06	4.01591e+06	3.70996e+06	3.53431e+06	3.88661e+06	3.40872e+06	3.83345e+06	4.13321e+06	3.66764e+06
Q8VEH3	ADP-ribosylation factor-like protein 8A [OS=Mus musculus]	Arl8a	3.29993e+06	3.13735e+06	3.02968e+06	2.98317e+06	3.39225e+06	2.5528e+06	3.12907e+06	3.1588e+06	2.96545e+06	3.02091e+06	2.8646e+06	2.72693e+06
O88952	Protein lin-7 homolog C [OS=Mus musculus]	Lin7c	8.60762e+06	8.6437e+06	8.43339e+06	8.35076e+06	7.51116e+06	9.07242e+06	7663497	7.26474e+06	1.04011e+07	1.1882e+07	1.01497e+07	1.02515e+07
O88543	COP9 signalosome complex subunit 3 [OS=Mus musculus]	Cops3	5.60461e+06	5.34863e+06	4.71321e+06	5.44587e+06	5.41977e+06	5.6956e+06	6.01397e+06	5.78739e+06	5.6784e+06	5.82824e+06	5.98464e+06	5.97279e+06
Q8K0E8	Fibrinogen beta chain [OS=Mus musculus]	Fgb	4.17455e+06	5.87014e+06	3.92762e+06	9.68056e+06	7.20529e+06	3.14753e+06	7.80286e+06	6.48843e+06				284578
Q8BG32	26S proteasome non-ATPase regulatory subunit 11 [OS=Mus musculus]	Psmd11	7.21869e+06	6.3868e+06	6.74306e+06	6.67523e+06	2.32874e+07	7.28488e+06	1.02745e+07	8.0328e+06	7.69045e+06	6.37678e+06	7.66805e+06	7.30598e+06
Q8BGU5	Cyclin-Y [OS=Mus musculus]	Ccny	6.51993e+06	6.07064e+06	5.7851e+06	6.13492e+06	5.54945e+06	6.94303e+06	6.09868e+06	6.34599e+06	8.29291e+06	7.30021e+06	6.64607e+06	7.72958e+06
P63001	Ras-related C3 botulinum toxin substrate 1 [OS=Mus musculus]	Rac1	1.10563e+08	9.74571e+07	1.04663e+08	9.93249e+07	1.01289e+08	1.10391e+08	1.01831e+08	9.19484e+07	1.08475e+08	1.21428e+08	1.06165e+08	1.13426e+08
Q91WS0	CDGSH iron-sulfur domain-containing protein 1 [OS=Mus musculus]	Cisd1	4.27047e+07	4.42762e+07	4.50929e+07	5.10614e+07	4.65727e+07	4.16524e+07	4.96361e+07	4.13879e+07	4.22574e+07	4.46316e+07	4.75806e+07	4.41673e+07
P62192	26S proteasome regulatory subunit 4 [OS=Mus musculus]	Psmc1	7.33752e+06	7.61091e+06	7.67691e+06	7.64141e+06	7.0594e+06	7.62877e+06	8.09555e+06	7.45277e+06	8.67876e+06	8.16995e+06	8.83162e+06	6.66459e+06
Q80YN3	Breast carcinoma-amplified sequence 1 homolog [OS=Mus musculus]	Bcas1	2.40332e+07	1.85829e+07	1.76049e+07	1.96725e+07	2.7031e+07	2.04774e+07	2.49381e+07	1.76614e+07	1.33394e+07	2.0285e+07	1.73356e+07	1.71733e+07
P97441	Zinc transporter 3 [OS=Mus musculus]	Slc30a3	2.54883e+07	2.10497e+07	2.41783e+07	2.32664e+07	2.28457e+07	2.16429e+07	1.96524e+07	2.2588e+07	2.29943e+07	2.28088e+07	2.57021e+07	2.35523e+07
A2A699	Protein FAM171A2 [OS=Mus musculus]	Fam171a2	3.76042e+06	3.55526e+06	3.77797e+06	3.34471e+06	3.90765e+06	3.81353e+06	3.36905e+06	4.10585e+06	4.86115e+06	4.54556e+06	4.04306e+06	5.67364e+06
O88703	Potassium/sodium hyperpolarization-activated cyclic nucleotide-gated channel 2 [OS=Mus musculus]	Hcn2	2.28596e+06	2.14725e+06	2.34402e+06	2.48875e+06	2.41661e+06	2.18241e+06	2.37617e+06	2.41475e+06	2.25469e+06	2.09571e+06	1.8619e+06	2.16668e+06
P62897	Cytochrome c, somatic [OS=Mus musculus]	Cycs	4.06922e+07	4.31053e+07	3.87607e+07	4.58239e+07	3.79488e+07	2.93511e+07	3.50849e+07	3.72658e+07	3.15918e+07	3.44303e+07	4.53699e+07	4.39095e+07
Q6A065	Centrosomal protein of 170 kDa [OS=Mus musculus]	Cep170	2.59637e+07	2.36354e+07	2.12373e+07	1.84037e+07	2.35448e+07	2.69116e+07	2.54724e+07	2.00906e+07	1.8139e+07	2.37632e+07	2.33018e+07	2.37597e+07
Q80VP1	Epsin-1 [OS=Mus musculus]	Epn1	1.21882e+07	1.26335e+07	1.30558e+07	1.22955e+07	1.27106e+07	1.31188e+07	1.26895e+07	9.40038e+06	1.37014e+07	1.34851e+07	1.34896e+07	1.18424e+07
Q9CX34	Protein SGT1 homolog [OS=Mus musculus]	Sugt1	7.94046e+06	7.88426e+06	7.48287e+06	7.68336e+06	7.81943e+06	9.42262e+06	9.56112e+06	7.61902e+06	7.80211e+06	9.14303e+06	9.1455e+06	7.50199e+06
Q8BHZ0	CYFIP-related Rac1 interactor A [OS=Mus musculus]	Cyria	37781118	4.24095e+07	4.35584e+07	4.75352e+07	4.31535e+07	4.56331e+07	4.68698e+07	4.36288e+07	5.097e+07	4.13583e+07	4.54682e+07	4.26541e+07
P62492	Ras-related protein Rab-11A [OS=Mus musculus]	Rab11a												24005.1
Q71M36	Chondroitin sulfate proteoglycan 5 [OS=Mus musculus]	Cspg5	1.32935e+07	1.48665e+07	1.41742e+07	1.28137e+07	1.20453e+07	1.74829e+07	1.38699e+07	1.23551e+07	2.09181e+07	1.73006e+07	1.782e+07	1.54975e+07
O88507	Ciliary neurotrophic factor receptor subunit alpha [OS=Mus musculus]	Cntfr	7.01583e+06	6.82582e+06	7.49393e+06	7.32246e+06	6.29449e+06	6.55735e+06	5.71733e+06	6.78554e+06	8.43598e+06	8.52876e+06	7.45799e+06	8.67927e+06
Q8BUN9	Sodium/potassium/calcium exchanger 2 [OS=Mus musculus]	Slc24a2	1.26445e+07	1.20573e+07	1.05794e+07	1.12131e+07	1.23338e+07	1.09711e+07	1.0192e+07	1.03679e+07	9.70379e+06	7.67878e+06	7.30572e+06	7.33638e+06
Q8R016	Bleomycin hydrolase [OS=Mus musculus]	Blmh	5.55394e+06	5.42476e+06	5.23318e+06	5.85546e+06	6.12547e+06	5.32677e+06	4.91834e+06	5.73506e+06	5.55297e+06	5.9091e+06	5.57616e+06	5.74842e+06
Q6X893	Choline transporter-like protein 1 [OS=Mus musculus]	Slc44a1	7.50575e+06	5.2735e+06	5.76402e+06	4.54138e+06	7.60284e+06	6.29964e+06	7.04582e+06	6.20509e+06	5.19454e+06	5.73984e+06	5.50447e+06	5.9879e+06
Q9R0P3	S-formylglutathione hydrolase [OS=Mus musculus]	Esd	1.00534e+07	1.1204e+07	1.08757e+07	1.12672e+07	1.22011e+07	1.27346e+07	1.26821e+07	1.44077e+07	1.16108e+07	1.13794e+07	1.1893e+07	1.0962e+07
A2AJA9	Apical junction component 1 homolog [OS=Mus musculus]	Ajm1	4.40698e+06	3.40428e+06	3.16813e+06	4.66636e+06	3.66973e+06	3.27203e+06	3.43735e+06	3.39502e+06	2.81792e+06	3.72109e+06	3.57612e+06	3.65544e+06
Q8BP92	Reticulocalbin-2 [OS=Mus musculus]	Rcn2	1.07292e+07	1.06484e+07	9.46063e+06	1.12787e+07	1.46133e+07	1.73223e+07	1.27428e+07	9.24196e+06	9.33978e+06	9.09953e+06	8.30156e+06	8.83577e+06
P59279	Ras-related protein Rab-2B [OS=Mus musculus]	Rab2b	1.0258e+06	1.10786e+06	1.10949e+06	851052	967665	1.09758e+06	1.0023e+06	1.06247e+06	1.04042e+06	1.06975e+06	1.17349e+06	1.03398e+06
Q9WUM5	Succinate--CoA ligase [ADP/GDP-forming] subunit alpha, mitochondrial [OS=Mus musculus]	Suclg1	1.33805e+07	1.46812e+07	1.31758e+07	1.59206e+07	1.45376e+07	1.09792e+07	1.39004e+07	1.62053e+07	1.17641e+07	1.33519e+07	1.71062e+07	1.60917e+07
Q9JKY5	Huntingtin-interacting protein 1-related protein [OS=Mus musculus]	Hip1r	3.728e+06	3.39738e+06	4.05755e+06	4.30729e+06	4.22612e+06	3.61118e+06	4.81203e+06	3.34887e+06	3.63515e+06	3.89663e+06	3.84126e+06	3.96108e+06
Q8BNY6	Neuronal calcium sensor 1 [OS=Mus musculus]	Ncs1	1.40549e+07	1.39188e+07	1.34344e+07	1.23579e+07	1.18842e+07	1.36739e+07	1.37248e+07	1.30531e+07	1.48981e+07	1.44318e+07	1.22303e+07	1.16351e+07
P60202	Myelin proteolipid protein [OS=Mus musculus]	Plp1	6.80928e+08	5.86224e+08	6.6847e+08	7.13137e+08	1005121168	6.03554e+08	8.78882e+08	6.56956e+08	4.93407e+08	7.17266e+08	6.16291e+08	5.54342e+08
O35864	COP9 signalosome complex subunit 5 [OS=Mus musculus]	Cops5	7.79069e+06	8.30744e+06	7.80805e+06	8.20063e+06	7.19643e+06	5.37596e+06	7.5854e+06	8.83616e+06	8.84465e+06	8.34691e+06	9.36183e+06	8.38289e+06
Q06138	Calcium-binding protein 39 [OS=Mus musculus]	Cab39	7.3846e+06	6.67473e+06	7.06375e+06	7.39395e+06	6.75637e+06	7.6013e+06	6.82834e+06	7.53246e+06	8.42127e+06	7.99246e+06	7.3729e+06	8.03067e+06
Q8BG67	Protein EFR3 homolog A [OS=Mus musculus]	Efr3a	1.62848e+06	1.6355e+06	1.28075e+06	1.6045e+06	1.43815e+06	1.63328e+06	1.39164e+06	1.7941e+06	2.21696e+06	1.74175e+06	1.39033e+06	1.78775e+06
P62835	Ras-related protein Rap-1A [OS=Mus musculus]	Rap1a	2.94687e+06	2.48593e+06	2.2522e+06	3.16018e+06	2.19364e+06	2.24221e+06	1.96604e+06	2.65252e+06	3.96833e+06	3.02047e+06	3.24167e+06	3.10609e+06
A2A8L5	Receptor-type tyrosine-protein phosphatase F [OS=Mus musculus]	Ptprf	139890	511029	196378	268936	500179	405358	423140	414334	368535	506595	458269	355807
Q924N4	Solute carrier family 12 member 6 [OS=Mus musculus]	Slc12a6	4.00031e+06	3.55106e+06	3.70176e+06	3.83182e+06	3.78567e+06	2.99005e+06	3.26508e+06	3.14977e+06	3.70075e+06	3.57793e+06	3.78697e+06	3.91598e+06
P58389	Serine/threonine-protein phosphatase 2A activator [OS=Mus musculus]	Ptpa	1.17758e+07	1.36141e+07	1.29301e+07	1.39588e+07	1.60798e+07	1.66982e+07	1.6111e+07	1.49882e+07	1.40945e+07	1.41866e+07	1.21996e+07	1.33203e+07
Q61036	Serine/threonine-protein kinase PAK 3 [OS=Mus musculus]	Pak3	667779	981528	1.10943e+06	1.20502e+06	922536	1.49197e+06	1.16653e+06	1.43521e+06	1.66885e+06	2.49959e+06	1.95466e+06	1.70838e+06
Q8BGH2	Sorting and assembly machinery component 50 homolog [OS=Mus musculus]	Samm50	9.47033e+06	1.06788e+07	8.72083e+06	9.69759e+06	8.77169e+06	6.43209e+06	8.57448e+06	9.53166e+06	8.9254e+06	9.60395e+06	1.09956e+07	1.29738e+07
Q91YM2	Rho GTPase-activating protein 35 [OS=Mus musculus]	Arhgap35	2.14678e+06	2.96762e+06	2.7841e+06	2.62867e+06	1.74842e+06	2.15037e+06	1.91827e+06	2.7217e+06	2.46783e+06	2.91168e+06	2.8846e+06	3.47093e+06
Q61885	Myelin-oligodendrocyte glycoprotein [OS=Mus musculus]	Mog	7.88667e+07	5.7811e+07	6.22493e+07	70434409	9.69505e+07	5.17217e+07	9.21267e+07	5.59516e+07	4.11347e+07	5.63003e+07	6.58678e+07	4.21596e+07
Q9WV80	Sorting nexin-1 [OS=Mus musculus]	Snx1	6.03337e+06	6.25111e+06	6.12766e+06	6.7955e+06	7.26885e+06	6.86054e+06	7.52256e+06	7.45189e+06	6.18331e+06	5.82172e+06	6.94472e+06	5.37481e+06
Q01065	Dual specificity calcium/calmodulin-dependent 3',5'-cyclic nucleotide phosphodiesterase 1B [OS=Mus musculus]	Pde1b	4.74177e+06	4.9404e+06	5.52549e+06	5.12858e+06	7.10903e+06	6.46444e+06	6.86958e+06	6.05445e+06	5.73181e+06	5.71493e+06	5.6717e+06	5.25098e+06
Q8BLR2	Copine-4 [OS=Mus musculus]	Cpne4	5.62609e+06	5.15592e+06	4.57472e+06	3.99838e+06	3.86668e+06	3.98777e+06	4.44246e+06	3.95285e+06	6.00543e+06	6.30989e+06	6.60657e+06	5.94006e+06
Q9DBS2	Tumor protein p63-regulated gene 1-like protein [OS=Mus musculus]	Tprg1l	8.91168e+06	1.00147e+07	8.61224e+06	7.43804e+06	8.80789e+06	7.70881e+06	8.10729e+06	8.84079e+06	1.06184e+07	1.06267e+07	1.21428e+07	1.16128e+07
Q64010	Adapter molecule crk [OS=Mus musculus]	Crk	1.11763e+07	1.16333e+07	1.13845e+07	1.26472e+07	1.29351e+07	1.33247e+07	1.26831e+07	1.2227e+07	1.29004e+07	1.29088e+07	1.36166e+07	1.25716e+07
P32037	Solute carrier family 2, facilitated glucose transporter member 3 [OS=Mus musculus]	Slc2a3	4.77532e+07	4.4408e+07	4.51781e+07	3.93339e+07	4.15668e+07	4.36527e+07	4.37558e+07	4.39223e+07	4.78859e+07	4.68116e+07	4.26548e+07	4.7838e+07
Q8K4G5	Actin-binding LIM protein 1 [OS=Mus musculus]	Ablim1	9.16281e+06	7.84207e+06	8.45412e+06	8.74669e+06	6.49528e+06	7.39785e+06	7.61536e+06	7254167	8.69062e+06	8.47358e+06	9.07905e+06	8.60689e+06
O08919	Numb-like protein [OS=Mus musculus]	Numbl	1.7913e+07	1.99451e+07	1.84886e+07	1.93178e+07	1.89499e+07	2.05857e+07	1.87468e+07	1.60516e+07	1.91932e+07	1.95842e+07	1.93575e+07	2.04957e+07
Q9CZD3	Glycine--tRNA ligase [OS=Mus musculus]	Gars1	1.7808e+07	1.975e+07	1.95303e+07	2.01176e+07	2.01746e+07	2.07461e+07	2.14505e+07	1.87386e+07	2.13801e+07	1.91398e+07	1.97321e+07	1.8038e+07
Q8BMG7	Rab3 GTPase-activating protein non-catalytic subunit [OS=Mus musculus]	Rab3gap2	4.37363e+06	5.04383e+06	4.37967e+06	5.0401e+06	4.75081e+06	3.86378e+06	5.16371e+06	4.21253e+06	4.61349e+06	4.66429e+06	5.19125e+06	4.47959e+06
P46935	E3 ubiquitin-protein ligase NEDD4 [OS=Mus musculus]	Nedd4	4.18742e+07	3.16378e+07	3.39239e+07	4.05307e+07	3.84158e+07	4.59812e+07	3.75586e+07	2.72025e+07	3.40668e+07	3.50421e+07	3.6364e+07	2.88863e+07
Q9WUC3	Lymphocyte antigen 6H [OS=Mus musculus]	Ly6h	2.37068e+07	1.4875e+07	1.17224e+07	9.48244e+06	1.68239e+07	3.79229e+07	2.80722e+07	1.0165e+07	6.3259e+07	5.16445e+07	2.65115e+07	2.40193e+07
Q922J3	CAP-Gly domain-containing linker protein 1 [OS=Mus musculus]	Clip1	3.90214e+06	3.70568e+06	4.29867e+06	4.78858e+06	4.01427e+06	3.3874e+06	4.05946e+06	4.99198e+06	3.49327e+06	3.9568e+06	4.05211e+06	3.79026e+06
E9Q7X7	Neurexin-2 [OS=Mus musculus]	Nrxn2	2.12897e+06	2.37259e+06	1.90908e+06	2.56708e+06	4.11942e+06	2.07909e+06	2.16482e+06	1.94494e+06	2.29894e+06	2.52199e+06	2.40282e+06	2.38257e+06
Q922R8	Protein disulfide-isomerase A6 [OS=Mus musculus]	Pdia6	6.58051e+06	7.44842e+06	7.2687e+06	6.54826e+06	1.08104e+07	1.072e+07	1.07872e+07	1.02967e+07	6.5204e+06	6.69915e+06	8.99358e+06	6.33419e+06
Q3UGR5	Haloacid dehalogenase-like hydrolase domain-containing protein 2 [OS=Mus musculus]	Hdhd2	5.55662e+06	6.03714e+06	6.03796e+06	6.2672e+06	6.1632e+06	4.60864e+06	5.65556e+06	7.18867e+06	7.01258e+06	6.23785e+06	6.70942e+06	6.83818e+06
Q99LC5	Electron transfer flavoprotein subunit alpha, mitochondrial [OS=Mus musculus]	Etfa	3.1342e+06	3.37572e+06	3.48314e+06	3.5308e+06	3.5027e+06	2.90441e+06	4.09131e+06	3.16784e+06	3.1204e+06	2.83401e+06	4.01037e+06	3.0341e+06
Q01063	cAMP-specific 3',5'-cyclic phosphodiesterase 4D [OS=Mus musculus]	Pde4d	6.89867e+06	8.45008e+06	8.15138e+06	7.44272e+06	6.5248e+06	7.04378e+06	6.66837e+06	7.05678e+06	7.49308e+06	7.59237e+06	6.7007e+06	7.27398e+06
Q61792	LIM and SH3 domain protein 1 [OS=Mus musculus]	Lasp1	3.59501e+07	3.35855e+07	3.65933e+07	3.66593e+07	3.25452e+07	3.86287e+07	3.46637e+07	2.8413e+07	4.44759e+07	4.24048e+07	4.56371e+07	3.72167e+07
P47738	Aldehyde dehydrogenase, mitochondrial [OS=Mus musculus]	Aldh2	1.54607e+07	1.45338e+07	1.23709e+07	1.61775e+07	1.72558e+07	1.84837e+07	2.08614e+07	1.76667e+07	1.35647e+07	1.53846e+07	1.49428e+07	1.38431e+07
Q99JI4	26S proteasome non-ATPase regulatory subunit 6 [OS=Mus musculus]	Psmd6	3.61604e+06	3.65312e+06	3.19234e+06	3.5367e+06	3.83473e+06	3.6444e+06	4.14367e+06	3.89668e+06	3.62772e+06	3.78023e+06	3.84183e+06	3.30843e+06
Q56A07	Sodium channel subunit beta-2 [OS=Mus musculus]	Scn2b	2.10677e+07	2.20217e+07	2.0205e+07	2.04029e+07	1.79342e+07	1.7888e+07	1.92964e+07	2.50426e+07	25893908	2.22087e+07	2.14425e+07	2.38898e+07
P28661	Septin-4 [OS=Mus musculus]	Septin4	2.74134e+07	2.60633e+07	2.90553e+07	3.28488e+07	3.47566e+07	2.19145e+07	2.79313e+07	2.91073e+07	2.58609e+07	2.68712e+07	3.1385e+07	2.81374e+07
Q99L04	Dehydrogenase/reductase SDR family member 1 [OS=Mus musculus]	Dhrs1	2.68501e+06	2.54405e+06	2.4059e+06	2.95474e+06	5.69296e+06	5.10259e+06	6.25639e+06	5.21521e+06	2.85922e+06	2.78596e+06	2.8699e+06	2.56668e+06
P55066	Neurocan core protein [OS=Mus musculus]	Ncan	1.47415e+07	1.68637e+07	1.81776e+07	1.61108e+07	1.65821e+07	1.57372e+07	1.56523e+07	1.43266e+07	1.56092e+07	1.59357e+07	1.73106e+07	1.70465e+07
Q8CDG3	Deubiquitinating protein VCPIP1 [OS=Mus musculus]	Vcpip1	3.39459e+06	6.86744e+06	5.41758e+06	4.26724e+06	3.12753e+06	3.9645e+06	3.73944e+06	7.16542e+06	3.71764e+06	7.93109e+06	6.10504e+06	9.78788e+06
Q9ESW4	Acylglycerol kinase, mitochondrial [OS=Mus musculus]	Agk	14118605	1.28936e+07	1.3034e+07	1.1863e+07	1.24955e+07	1.43839e+07	1.1447e+07	1.15369e+07	1.42533e+07	1.43718e+07	1.46751e+07	1.77541e+07
P18572	Basigin [OS=Mus musculus]	Bsg	3.60714e+07	3.35942e+07	3.88474e+07	3.36299e+07	3.36239e+07	4.57633e+07	3.9059e+07	3.41582e+07	3.44189e+07	2.83961e+07	2.75935e+07	2.83063e+07
P35293	Ras-related protein Rab-18 [OS=Mus musculus]	Rab18	1.49236e+07	1.48474e+07	1.20672e+07	1.19156e+07	1.36337e+07	1.43308e+07	1.47527e+07	1.37428e+07	1.07636e+07	1.33954e+07	1.42046e+07	1.20336e+07
Q05816	Fatty acid-binding protein 5 [OS=Mus musculus]	Fabp5	1.63726e+07	1.92423e+07	1.66225e+07	1.40521e+07	2.14417e+07	2.68274e+07	2.63888e+07	2.08199e+07	2.26212e+07	2.19215e+07	1.84858e+07	1.71547e+07
P18242	Cathepsin D [OS=Mus musculus]	Ctsd	6.24133e+06	6.21816e+06	6.78899e+06	6.52456e+06	1.2118e+07	1.44076e+07	1.74068e+07	1.24896e+07	6.60174e+06	8.4184e+06	1.02686e+07	6.42277e+06
Q9R1P4	Proteasome subunit alpha type-1 [OS=Mus musculus]	Psma1	6.99824e+06	7.99583e+06	7.09379e+06	7.22001e+06	7.39198e+06	7.87267e+06	8.47733e+06	8.36367e+06	8.22438e+06	8.62339e+06	7.70932e+06	7.99695e+06
Q9Z2C4	Myotubularin-related protein 1 [OS=Mus musculus]	Mtmr1	2.91504e+06	2.76949e+06	2.92228e+06	3.37568e+06	2.71413e+06	2.89483e+06	2.71361e+06	3.29841e+06	3.54296e+06	3.83727e+06	3.29762e+06	3.59494e+06
Q61166	Microtubule-associated protein RP/EB family member 1 [OS=Mus musculus]	Mapre1	6.68748e+06	4.48059e+06	4.52301e+06	4.73803e+06	3.99726e+06	4.33738e+06	3.94731e+06	5.57238e+06	6.06365e+06	5.84811e+06	5.86635e+06	9.45851e+06
P28474	Alcohol dehydrogenase class-3 [OS=Mus musculus]	Adh5	5.54303e+06	5.48336e+06	5.78768e+06	5.7397e+06	6.08444e+06	7.54435e+06	6.38237e+06	6.42458e+06	7.33931e+06	7.54588e+06	7.64522e+06	6.20734e+06
P62827	GTP-binding nuclear protein Ran [OS=Mus musculus]	Ran	1.91472e+07	1.8101e+07	1.81307e+07	1.9552e+07	2.27898e+07	2.05679e+07	2.30533e+07	1.91511e+07	1.75713e+07	2.02965e+07	2.05267e+07	1.93585e+07
Q3THE2	Myosin regulatory light chain 12B [OS=Mus musculus]	Myl12b	2.19146e+07	2.28765e+07	2.26277e+07	2.27724e+07	2.55131e+07	2.34796e+07	2.75097e+07	2.68714e+07	2.48792e+07	2.25824e+07	2.41903e+07	2.46784e+07
Q6WVG3	BTB/POZ domain-containing protein KCTD12 [OS=Mus musculus]	Kctd12	8.74171e+06	1.1137e+07	8.82047e+06	7.11518e+06	7.66183e+06	10412559	8.67763e+06	8.7831e+06	1.07263e+07	1.17914e+07	1.22996e+07	9.92701e+06
Q3UPL0	Protein transport protein Sec31A [OS=Mus musculus]	Sec31a	1.63979e+06	2.71272e+06	1.98092e+06	3.45733e+06	3.32553e+06	2.61893e+06	2.69949e+06	4.12375e+06	2.82064e+06	2.63836e+06	2.89813e+06	3.67844e+06
O88444	Adenylate cyclase type 1 [OS=Mus musculus]	Adcy1	1.5236e+07	1.91372e+06	1.88774e+06	1.75431e+06	1.78453e+06	2.11119e+06	1.33167e+06	2.09074e+06	2.77834e+06	2.27785e+06	1.32463e+06	2.28998e+06
Q8CGK7	Guanine nucleotide-binding protein G(olf) subunit alpha [OS=Mus musculus]	Gnal	1.28851e+06	1.06273e+06	1.14286e+06	1.95534e+06	1.20856e+06	958574	1.38075e+06	2.09469e+06	1.55835e+06	1.05136e+06	1.03747e+06	1.45392e+06
Q62465	Synaptic vesicle membrane protein VAT-1 homolog [OS=Mus musculus]	Vat1	7.2591e+06	7.03939e+06	6.96188e+06	7.1977e+06	7.40998e+06	7.92055e+06	7.09666e+06	7.3674e+06	7.8979e+06	8.93493e+06	1.05457e+07	1.12045e+07
Q9CQW1	Synaptobrevin homolog YKT6 [OS=Mus musculus]	Ykt6	4.02801e+07	5.2032e+07	4.28145e+07	4.35187e+07	4.30004e+07	4.71586e+07	4.08884e+07	4.26501e+07	4.52062e+07	5.3764e+07	4.18733e+07	4.66316e+07
Q64105	Sepiapterin reductase [OS=Mus musculus]	Spr	4.79606e+06	6.17432e+06	7.13477e+06	6.25297e+06	8.46561e+06	6.51693e+06	6.9988e+06	7.76592e+06	8.69895e+06	7.31179e+06	6.98016e+06	7.02898e+06
Q9CWK8	Sorting nexin-2 [OS=Mus musculus]	Snx2	5.1524e+06	4.58323e+06	5.4247e+06	6.0401e+06	5.43486e+06	5.69403e+06	6.64792e+06	6.24808e+06	5.15465e+06	5.90985e+06	6.34687e+06	5.72991e+06
O09061	Proteasome subunit beta type-1 [OS=Mus musculus]	Psmb1	7.2131e+07	6.6825e+07	7.29585e+07	5.96199e+07	6.24865e+07	6.6019e+07	6.4665e+07	6.46516e+07	5.93325e+07	6.9753e+07	6.58933e+07	6.46973e+07
Q6PFD5	Disks large-associated protein 3 [OS=Mus musculus]	Dlgap3	7.59091e+06	8.3227e+06	8.60684e+06	8.76368e+06	7.04383e+06	9.58532e+06	8.83419e+06	7.85636e+06	8.49002e+06	7.23711e+06	1.00181e+07	8.00748e+06
Q9WVJ2	26S proteasome non-ATPase regulatory subunit 13 [OS=Mus musculus]	Psmd13	6.63471e+06	7.14613e+06	7.23103e+06	6.55868e+06	6.88532e+06	7.38754e+06	8.01789e+06	8.26304e+06	8.9487e+06	7.95812e+06	7.23223e+06	7.74895e+06
Q99K10	Neuroligin-1 [OS=Mus musculus]	Nlgn1	1.00247e+06	965506	671878	909106	423368	551073	640352	421738	1.22912e+06	943383	879287	724630
Q8K394	Inactive phospholipase C-like protein 2 [OS=Mus musculus]	Plcl2	6.45361e+06	6.46704e+06	7.01899e+06	6.83228e+06	6.73544e+06	6.63219e+06	6.83439e+06	5.79922e+06	7.44984e+06	6.16237e+06	6.38814e+06	6.10201e+06
Q99KB8	Hydroxyacylglutathione hydrolase, mitochondrial [OS=Mus musculus]	Hagh	6.23206e+06	7.38665e+06	8.50436e+06	7.86098e+06	7.54091e+06	7.58421e+06	8.46753e+06	6.73526e+06	6.63959e+06	7.70199e+06	7.13033e+06	7.08781e+06
Q04736	Tyrosine-protein kinase Yes [OS=Mus musculus]	Yes1	346980	79790.3	221090	247710	254572	284424	96055.2	511165	557427	360264	424069	173610
P63137	Gamma-aminobutyric acid receptor subunit beta-2 [OS=Mus musculus]	Gabrb2	1.11284e+07	1.14546e+07	1.2906e+07	1.16836e+07	9.31921e+06	1.00894e+07	1.12697e+07	1.17481e+07	1.23953e+07	1.08155e+07	1.11546e+07	1.14758e+07
Q80TL0	Protein phosphatase 1E [OS=Mus musculus]	Ppm1e	7.45845e+06	7.02446e+06	5.81254e+06	5.54436e+06	6.14169e+06	6.64151e+06	6.06853e+06	6.48974e+06	8.48631e+06	7.16696e+06	7.67978e+06	6.7281e+06
P28665	Murinoglobulin-1 [OS=Mus musculus]	Mug1	5.4017e+06	6.05756e+06	5.33981e+06	6.08106e+06	7.00821e+06	5.36618e+06	5.70339e+06	6.97793e+06	4.3152e+06	4.55453e+06	4.37817e+06	3.37918e+06
P62743	AP-2 complex subunit sigma [OS=Mus musculus]	Ap2s1	5.8929e+07	5.73625e+07	6.12655e+07	6.59467e+07	6.08533e+07	6.09796e+07	5.85576e+07	6.79282e+07	6.2059e+07	5.82628e+07	6.2502e+07	6.57015e+07
P49025	Citron Rho-interacting kinase [OS=Mus musculus]	Cit	3.22242e+06	3.06084e+06	2.89434e+06	3.5917e+06	2.68135e+06	1.93406e+06	4.28401e+06	3.19223e+06	2.49994e+06	3.03521e+06	3.92906e+06	3.75344e+06
P62334	26S proteasome regulatory subunit 10B [OS=Mus musculus]	Psmc6	1.19077e+07	1.19952e+07	1.2423e+07	1.22842e+07	1.46844e+07	1.46982e+07	1.37419e+07	1.32472e+07	1.32946e+07	1.25605e+07	1.26742e+07	1.00559e+07
P42669	Transcriptional activator protein Pur-alpha [OS=Mus musculus]	Pura	9.42751e+06	9.4175e+06	1.27885e+07	9.72535e+06	9.83363e+06	8.15846e+06	9.23019e+06	9.21029e+06	7.4335e+06	9.53946e+06	9.90939e+06	1.00997e+07
Q8C0M9	Isoaspartyl peptidase/L-asparaginase [OS=Mus musculus]	Asrgl1	9.72628e+06	1.04992e+07	1.1145e+07	9.70611e+06	1.02479e+07	1.15564e+07	1.05173e+07	1.06205e+07	1.5062e+07	1.45989e+07	1.50316e+07	1.44738e+07
Q01405	Protein transport protein Sec23A [OS=Mus musculus]	Sec23a	5.27732e+06	4.48945e+06	4.38859e+06	3.95958e+06	5.50837e+06	4.35492e+06	5.11044e+06	4.79814e+06	5.5216e+06	4.28677e+06	5.88539e+06	4.98465e+06
P31648	Sodium- and chloride-dependent GABA transporter 1 [OS=Mus musculus]	Slc6a1	43982165	5.20577e+07	4.96529e+07	4.55565e+07	4.22394e+07	4.94309e+07	4.87161e+07	4.46598e+07	5.68756e+07	5.24617e+07	5.4242e+07	4.44447e+07
Q9D7G0	Ribose-phosphate pyrophosphokinase 1 [OS=Mus musculus]	Prps1	9.06983e+06	8.93736e+06	9.31179e+06	9.86113e+06	1.07304e+07	9.8967e+06	1.22131e+07	1.18009e+07	1.28627e+07	1.10205e+07	1.26603e+07	1.11626e+07
Q9JLF6	Protein-glutamine gamma-glutamyltransferase K [OS=Mus musculus]	Tgm1	728752	154687	709009	143422	5.78296e+06	6.52969e+06	6.33981e+06	4.47424e+06				130058
Q9D4H8	Cullin-2 [OS=Mus musculus]	Cul2	3.13946e+06	3.14351e+06	2.43967e+06	3.16117e+06	2.79807e+06	3.35295e+06	3.47831e+06	3.27633e+06	3.97602e+06	3.89608e+06	4.05258e+06	3.70763e+06
Q3UGY8	Brefeldin A-inhibited guanine nucleotide-exchange protein 3 [OS=Mus musculus]	Arfgef3	2.06087e+06	1.90712e+06	1.4872e+06	1.80966e+06	1.71478e+06	1.50558e+06	5.34012e+06	1.93577e+06	1.8001e+06	1.54816e+06	1.78754e+06	2.08495e+06
Q8VCM7	Fibrinogen gamma chain [OS=Mus musculus]	Fgg	3.44761e+06	4.59479e+06	3.00923e+06	4.22343e+06	5.83487e+06	3.14455e+06	6.18574e+06	4.77681e+06	360042	378155	369596	513231
O55125	Protein NipSnap homolog 1 [OS=Mus musculus]	Nipsnap1	7.27773e+06	1.01812e+07	8.65984e+06	1.05198e+07	8.26538e+06	5.01174e+06	8.23424e+06	7.88318e+06	7.60477e+06	8.4974e+06	1.18179e+07	1.08199e+07
Q6A4J8	Ubiquitin carboxyl-terminal hydrolase 7 [OS=Mus musculus]	Usp7	2.50023e+06	2.98336e+06	2.40039e+06	3.22163e+06	3.07788e+06	3.78481e+06	3.40868e+06	2.4518e+06	3.49283e+06	3.40773e+06	3.2265e+06	3.15711e+06
Q9EPW0	Inositol polyphosphate-4-phosphatase type I A [OS=Mus musculus]	Inpp4a	6.99789e+06	5.90191e+06	6.33529e+06	5.4122e+06	6.43294e+06	5.36674e+06	7.1591e+06	5.38183e+06	7.33823e+06	5.71435e+06	7.54783e+06	5.12722e+06
P80560	Receptor-type tyrosine-protein phosphatase N2 [OS=Mus musculus]	Ptprn2	3.29516e+06	3.00623e+06	3.40808e+06	2.92678e+06	3.61113e+06	3.28364e+06	3.45536e+06	2.73736e+06	4.43653e+06	4.11121e+06	4.57789e+06	4.11913e+06
Q2NL51	Glycogen synthase kinase-3 alpha [OS=Mus musculus]	Gsk3a	4.18766e+06	4.56608e+06	3.67659e+06	4.68813e+06	4.4437e+06	3.98994e+06	4.07917e+06	4.62321e+06	4.36017e+06	4.22638e+06	4.33543e+06	4.99714e+06
P28656	Nucleosome assembly protein 1-like 1 [OS=Mus musculus]	Nap1l1	1.0219e+07	8.63683e+06	8.41712e+06	1.16992e+07	8.95128e+06	9.15018e+06	1.04473e+07	1.01079e+07	1.06944e+07	1.06268e+07	1.10987e+07	1.15971e+07
P55264	Adenosine kinase [OS=Mus musculus]	Adk	5.75818e+06	5.91563e+06	6.31929e+06	5.59228e+06	5.97965e+06	6.75186e+06	5.99411e+06	8.40276e+06	7.46322e+06	7.56929e+06	6.59173e+06	6.85215e+06
E9PV24	Fibrinogen alpha chain [OS=Mus musculus]	Fga	3.89503e+06	5.64539e+06	4.6366e+06	5.73725e+06	8.93374e+06	5.37872e+06	8.89885e+06	8.05885e+06	134390	59355.5	296470
Q6PB66	Leucine-rich PPR motif-containing protein, mitochondrial [OS=Mus musculus]	Lrpprc	1.54945e+07	1.27562e+07	1.32307e+07	1.55759e+07	1.18062e+07	1.00707e+07	1.32214e+07	1.15186e+07	1.42677e+07	1.33619e+07	1.6867e+07	1.45371e+07
Q8BPM0	Disheveled-associated activator of morphogenesis 1 [OS=Mus musculus]	Daam1	5.01629e+06	5.30522e+06	4.13183e+06	4.90549e+06	4.64221e+06	5.41263e+06	5.57294e+06	4.86381e+06	5.04733e+06	4.73542e+06	4.43532e+06	4.68396e+06
Q7TQD2	Tubulin polymerization-promoting protein [OS=Mus musculus]	Tppp	9.36886e+07	7.81042e+07	8.74778e+07	8.53705e+07	7.16541e+07	7.97062e+07	7.71133e+07	7.51986e+07	103118606	8.44072e+07	9.18693e+07	1.0342e+08
Q8CIQ7	Dedicator of cytokinesis protein 3 [OS=Mus musculus]	Dock3	1.19492e+06	1.22766e+06	1.09927e+06	1.28345e+06	1.244e+06	666596	990812	1.19896e+06	1.84703e+06	1.54385e+06	1.50726e+06	1.65339e+06
Q80U63	Mitofusin-2 [OS=Mus musculus]	Mfn2	1.04228e+07	1.07859e+07	9.16782e+06	1.21276e+07	1.02607e+07	1.12311e+07	1.21381e+07	1.02838e+07	1.06642e+07	1.01326e+07	1.18162e+07	1.22052e+07
P00493	Hypoxanthine-guanine phosphoribosyltransferase [OS=Mus musculus]	Hprt1	1.02904e+07	1.09409e+07	1.02992e+07	1.03851e+07	1.06503e+07	1.31559e+07	1.02694e+07	1.163e+07	1.32867e+07	1.23989e+07	1.28391e+07	1.15604e+07
Q9DCL9	Bifunctional phosphoribosylaminoimidazole carboxylase/phosphoribosylaminoimidazole succinocarboxamide synthetase [OS=Mus musculus]	Paics	1.94216e+07	1.66971e+07	2.31423e+07	2.72652e+07	1.92637e+07	1.98794e+07	2.05999e+07	2.11394e+07	1.62915e+07	1.45758e+07	1.54235e+07	1.56169e+07
Q9DCJ5	NADH dehydrogenase [ubiquinone] 1 alpha subcomplex subunit 8 [OS=Mus musculus]	Ndufa8	1.38631e+07	1.40793e+07	1.43355e+07	1.59416e+07	1.41173e+07	1.01949e+07	1.45637e+07	1.30306e+07	1.22243e+07	1.14608e+07	1.48463e+07	1.43878e+07
O70228	Probable phospholipid-transporting ATPase IIA [OS=Mus musculus]	Atp9a	4.99801e+06	4.57133e+06	3.32652e+06	4.51935e+06	5.05885e+06	4.6594e+06	4.97046e+06	5.01079e+06	3.95688e+06	3.50115e+06	4.04593e+06	3.54946e+06
Q9Z0S1	3'(2'),5'-bisphosphate nucleotidase 1 [OS=Mus musculus]	Bpnt1	4.80712e+06	5.02758e+06	4.33688e+06	4.9632e+06	5.42142e+06	5.2229e+06	5.38203e+06	4.93172e+06	5.27799e+06	5.74505e+06	5.09885e+06	4.86422e+06
Q68FD9	UPF0606 protein KIAA1549 [OS=Mus musculus]	Kiaa1549	1.25343e+07	9.51273e+06	1.04192e+07	1.06059e+07	1.11742e+07	1.00127e+07	1.14718e+07	1.18789e+07	1.20598e+07	1.18891e+07	1.29147e+07	1.4098e+07
O70172	Phosphatidylinositol 5-phosphate 4-kinase type-2 alpha [OS=Mus musculus]	Pip4k2a	5.40801e+06	5.28522e+06	4.94582e+06	6.44892e+06	5.41929e+06	4.91634e+06	5.60296e+06	5.06494e+06	4.8503e+06	5.5897e+06	5.26182e+06	5.77467e+06
Q7SIG6	Arf-GAP with SH3 domain, ANK repeat and PH domain-containing protein 2 [OS=Mus musculus]	Asap2	8.18414e+06	4.33369e+06	7.25799e+06	6.60705e+06	5.88266e+06	9.56661e+06	7.97994e+06	7.35143e+06	5.4862e+06	5.87928e+06	5.79687e+06	8.47852e+06
P97370	Sodium/potassium-transporting ATPase subunit beta-3 [OS=Mus musculus]	Atp1b3	1.7387e+07	1.64456e+07	1.97598e+07	1.76455e+07	2.14839e+07	1.90639e+07	2.12007e+07	1.93341e+07	1.88246e+07	2.09909e+07	1.79241e+07	1.75697e+07
Q8BJ42	Disks large-associated protein 2 [OS=Mus musculus]	Dlgap2	6.56078e+06	7.68748e+06	6.63827e+06	6.68159e+06	6.60327e+06	6.69984e+06	7.10229e+06	6.73037e+06	5.8195e+06	6.10225e+06	6.58916e+06	6.16776e+06
Q91YE6	Importin-9 [OS=Mus musculus]	Ipo9	1.00193e+06	1.69198e+06	862357	1.94583e+06	1.15324e+06	1.19623e+06	1.14928e+06	1.38367e+06	1.50894e+06	1.18671e+06	1.31334e+06	955034
P09405	Nucleolin [OS=Mus musculus]	Ncl	5.43915e+06	5.69587e+06	6.05645e+06	5.01268e+06	4.23533e+06	4.75453e+06	7.35877e+06	5.87788e+06	3.71058e+06	3.81944e+06	6.0322e+06	5.17229e+06
P70663	SPARC-like protein 1 [OS=Mus musculus]	Sparcl1	6.24104e+06	5.93726e+06	6.57839e+06	4.96785e+06	4.86293e+06	6.35516e+06	5.08259e+06	6.56336e+06	7.84182e+06	7.11167e+06	6.78199e+06	7.63107e+06
Q9CY64	Biliverdin reductase A [OS=Mus musculus]	Blvra	8.03582e+06	8.94182e+06	8.80051e+06	8.37338e+06	1.01955e+07	1.06505e+07	1.06596e+07	8.90441e+06	9.58968e+06	9.48861e+06	9.57327e+06	9.72462e+06
Q08331	Calretinin [OS=Mus musculus]	Calb2	1.27244e+07	1.26043e+07	1.45675e+07	1.514e+07	1.37274e+07	9.66145e+06	1.26564e+07	9.4877e+06	1.26393e+07	1.53791e+07	1.29346e+07	1.45125e+07
P19783	Cytochrome c oxidase subunit 4 isoform 1, mitochondrial [OS=Mus musculus]	Cox4i1	5.20082e+07	64490020	6.27511e+07	5.9812e+07	6.17449e+07	4.00887e+07	5.90002e+07	5.67407e+07	4.89052e+07	4.83167e+07	5.86612e+07	5.50834e+07
P61294	Ras-related protein Rab-6B [OS=Mus musculus]	Rab6b	9.44992e+06	1.00594e+07	1.04581e+07	1.04751e+07	6.5441e+06	7.1826e+06	9.01409e+06	8.45303e+06	7.39671e+06	6.67717e+06	9.30027e+06	8.7326e+06
Q5EBJ4	Ermin [OS=Mus musculus]	Ermn	1.00975e+07	8.57562e+06	9.61278e+06	7.76466e+06	1.37397e+07	9.72631e+06	1.16774e+07	8.67858e+06	6.86531e+06	8.25478e+06	7.15211e+06	7.82472e+06
P10605	Cathepsin B [OS=Mus musculus]	Ctsb	1.11145e+07	1.00412e+07	1.01517e+07	1.33831e+07	1.47918e+07	1.30413e+07	1.7049e+07	1.89614e+07	1.02524e+07	8.80256e+06	8.90059e+06	1.13695e+07
Q3UHB8	Coiled-coil domain-containing protein 177 [OS=Mus musculus]	Ccdc177	7.00668e+06	6.92953e+06	6.87563e+06	6.35049e+06	6.8972e+06	6.01331e+06	6.75851e+06	5.7109e+06	7.18734e+06	7.7468e+06	6.67413e+06	6.13254e+06
P30416	Peptidyl-prolyl cis-trans isomerase FKBP4 [OS=Mus musculus]	Fkbp4	4.70452e+06	4.12097e+06	5.65268e+06	5.49948e+06	5.71283e+06	5.81836e+06	6.52711e+06	5.30613e+06	6.20215e+06	3.5554e+06	4.86439e+06	3.94842e+06
P20108	Thioredoxin-dependent peroxide reductase, mitochondrial [OS=Mus musculus]	Prdx3	1.9231e+07	1.81872e+07	1.89902e+07	1.30173e+07	1.5747e+07	1.38829e+07	1.31832e+07	1.18996e+07	1.25031e+07	1.446e+07	1.79998e+07	1.39215e+07
Q9QZC2	Plexin-C1 [OS=Mus musculus]	Plxnc1	2.09313e+06	1.95826e+06	1.57396e+06	1.40097e+06	1.40726e+06	1.70723e+06	1.1345e+06	1.48241e+06	2.95539e+06	3.58684e+06	3.1436e+06	3.46324e+06
Q8BK64	Activator of 90 kDa heat shock protein ATPase homolog 1 [OS=Mus musculus]	Ahsa1	6.16068e+06	7.66395e+06	6.94122e+06	6.85363e+06	7.9937e+06	6.51637e+06	8.65809e+06	7.22707e+06	8.58566e+06	8.31459e+06	8.81143e+06	8.40623e+06
Q920P3	BMP/retinoic acid-inducible neural-specific protein 1 [OS=Mus musculus]	Brinp1	5.35895e+06	4.67113e+06	5.22014e+06	4.82259e+06	4.87149e+06	4.96024e+06	4.69138e+06	4.38539e+06	5.47531e+06	4.53086e+06	4.15692e+06	4.57739e+06
Q9JL26	Formin-like protein 1 [OS=Mus musculus]	Fmnl1	4.12623e+06	3.84924e+06	3.76076e+06	4.48656e+06	5.25725e+06	5.49423e+06	4.54259e+06	5.5598e+06	4.21565e+06	4.27227e+06	4.36723e+06	4.18569e+06
P54285	Voltage-dependent L-type calcium channel subunit beta-3 [OS=Mus musculus]	Cacnb3	3.10226e+06	2.87477e+06	3.04495e+06	2.9665e+06	3.32005e+06	2.39286e+06	2547359	3.51055e+06	3.04422e+06	1.91523e+06	3.62241e+06	3.92424e+06
Q3UH93	Plexin-D1 [OS=Mus musculus]	Plxnd1	5.41312e+06	4.60819e+06	4.74132e+06	4.10652e+06	4.11588e+06	5.14441e+06	4.14649e+06	4.0626e+06	7.77215e+06	8.17058e+06	5.44389e+06	5.87493e+06
Q9DBC7	cAMP-dependent protein kinase type I-alpha regulatory subunit [OS=Mus musculus]	Prkar1a	9.85265e+06	9.65256e+06	1.12857e+07	1.02969e+07	1.08395e+07	1.10015e+07	1.05657e+07	9.65997e+06	8.80347e+06	1.00477e+07	8.60971e+06	9.12553e+06
Q99MN9	Propionyl-CoA carboxylase beta chain, mitochondrial [OS=Mus musculus]	Pccb	2.1122e+06	2.13852e+06	1.76872e+06	2.06335e+06	1.61088e+06	859190	2.10464e+06	1.44552e+06	1.37231e+06	1.67437e+06	2.06511e+06	1.77205e+06
O35681	Synaptotagmin-3 [OS=Mus musculus]	Syt3	2.86698e+06	3.12219e+06	3.58833e+06	2.8793e+06	2.49112e+06	2.34101e+06	2.40006e+06	2.92847e+06	3.53966e+06	3.31844e+06	3.20432e+06	3.07296e+06
Q91YJ2	Sorting nexin-4 [OS=Mus musculus]	Snx4	4.14332e+06	4.46274e+06	3.98356e+06	4.46121e+06	4.18565e+06	3.28372e+06	4.51036e+06	4.53552e+06	4.30215e+06	4.24234e+06	4.85588e+06	4.26207e+06
Q921H8	3-ketoacyl-CoA thiolase A, peroxisomal [OS=Mus musculus]	Acaa1a	3.21552e+06	3.5567e+06	4.46354e+06	3.31442e+06	4.20599e+06	3.78944e+06	4.61964e+06	4.51362e+06	3.7014e+06	3.42011e+06	3.76732e+06	3.85766e+06
Q9R1P0	Proteasome subunit alpha type-4 [OS=Mus musculus]	Psma4	6.20577e+06	6.47464e+06	5.95132e+06	6.2507e+06	6.66869e+06	9.45768e+06	7.10815e+06	6.74506e+06	7.82334e+06	7.04351e+06	7.05099e+06	5.7285e+06
Q9WTQ5	A-kinase anchor protein 12 [OS=Mus musculus]	Akap12	1.16734e+06	886257	974092	728229	1.64846e+06	1.75861e+06	1.41851e+06	1.12371e+06	823670	758853	962291	1.29802e+06
Q6URW6	Myosin-14 [OS=Mus musculus]	Myh14	2.04996e+07	1.05422e+06	2.39993e+07	1.16724e+06	1.53211e+06	1.92027e+07	2.2463e+07	1.16963e+06	2.20882e+07	1.98827e+07	2.40898e+07	2.38254e+07
P58021	Transmembrane 9 superfamily member 2 [OS=Mus musculus]	Tm9sf2	3.50048e+06	4.21251e+06	3.00871e+06	3.19146e+06	3.96385e+06	5.06078e+06	5.49208e+06	2.95059e+06	3.75471e+06	3.26272e+06	4.31498e+06	1.57942e+06
Q61361	Brevican core protein [OS=Mus musculus]	Bcan	3.20059e+07	3.26343e+07	3.19307e+07	2.49301e+07	2.9041e+07	3.1266e+07	2.94068e+07	2.60745e+07	3.65105e+07	3.27751e+07	3.50638e+07	3.11699e+07
Q9D1P4	Cysteine and histidine-rich domain-containing protein 1 [OS=Mus musculus]	Chordc1	2.09792e+07	2.30354e+07	2.16194e+07	2.60228e+07	2.15182e+07	2.65781e+07	2.42214e+07	2.43653e+07	2.31139e+07	2.19483e+07	2.40839e+07	1.87802e+07
Q8CHP8	Glycerol-3-phosphate phosphatase [OS=Mus musculus]	Pgp	5.39904e+06	5.64495e+06	5.29515e+06	6.11086e+06	5.90373e+06	6.48733e+06	6.73508e+06	5.96336e+06	6.07754e+06	6.47125e+06	5.47759e+06	4.98321e+06
P40336	Vacuolar protein sorting-associated protein 26A [OS=Mus musculus]	Vps26a	1.05872e+07	9.95126e+06	9.01149e+06	9.26932e+06	1.00293e+07	1.03718e+07	1.05908e+07	1.07831e+07	9.89522e+06	1.08227e+07	9.65541e+06	9.47497e+06
P49443	Protein phosphatase 1A [OS=Mus musculus]	Ppm1a	1.00662e+07	9.09806e+06	8.93422e+06	9.25444e+06	1.09572e+07	1.2803e+07	1.13702e+07	9.08859e+06	1.34554e+07	1.21699e+07	1.02884e+07	8.67331e+06
Q3TDK6	Protein rogdi homolog [OS=Mus musculus]	Rogdi	6.16007e+06	6.87436e+06	6.97894e+06	6.46742e+06	6.6214e+06	5.83965e+06	6.51542e+06	6.78218e+06	6.68017e+06	5.87965e+06	7.01754e+06	7.45555e+06
Q8BW96	Calcium/calmodulin-dependent protein kinase type 1D [OS=Mus musculus]	Camk1d	1.57638e+07	2.29607e+07	20402405	1.98459e+07	1.73582e+07	2.22546e+07	1.97526e+07	2.57408e+07	2.15528e+07	1.70088e+07	2.188e+07	2.25861e+07
Q64737	Trifunctional purine biosynthetic protein adenosine-3 [OS=Mus musculus]	Gart	9.09852e+06	9.56128e+06	7.65285e+06	1.02379e+07	1.01341e+07	1.07064e+07	1.15193e+07	9.72612e+06	6.65154e+06	7.53133e+06	8.61036e+06	8.76027e+06
Q9D2N4	Dystrobrevin alpha [OS=Mus musculus]	Dtna	4.25326e+06	3.4968e+06	3.78874e+06	3.32575e+06	3.59249e+06	2.90831e+06	3.57121e+06	3.54683e+06	4.24475e+06	3.79112e+06	3.68471e+06	3.77351e+06
Q91WQ3	Tyrosine--tRNA ligase, cytoplasmic [OS=Mus musculus]	Yars1	6.48125e+06	5.48507e+06	6.38592e+06	6.35202e+06	6.45195e+06	6.66018e+06	6.55049e+06	6.15936e+06	5.86771e+06	5.55995e+06	6.35702e+06	5.14225e+06
A6H5Z3	Exocyst complex component 6B [OS=Mus musculus]	Exoc6b	2.87895e+06	3.0062e+06	2.71196e+06	3.07164e+06	2.77365e+06	2.93088e+06	2.94302e+06	3.16097e+06	3.398e+06	3.03692e+06	3.17118e+06	3.55111e+06
Q9QZ88	Vacuolar protein sorting-associated protein 29 [OS=Mus musculus]	Vps29	7.80398e+06	8.19231e+06	7.56095e+06	9.01643e+06	7.13773e+06	7.62584e+06	7.90262e+06	9.44487e+06	8.29902e+06	8.37612e+06	8.74038e+06	7.5543e+06
P61028	Ras-related protein Rab-8B [OS=Mus musculus]	Rab8b	8.76428e+06	7.71008e+06	8.03066e+06	7.98893e+06	7.89113e+06	7.07593e+06	7.83544e+06	7.68658e+06	7.2647e+06	9.02428e+06	7.779e+06	7.47123e+06
Q8C166	Copine-1 [OS=Mus musculus]	Cpne1	2.74142e+06	3.01175e+06	2.71175e+06	2.82327e+06	3.32773e+06	3.78645e+06	3.20859e+06	4.17061e+06	2.88813e+06	2.6056e+06	2.53492e+06	2.75688e+06
P03995	Glial fibrillary acidic protein [OS=Mus musculus]	Gfap	5.82909e+06	5.45546e+06	6.59546e+06	6.6238e+06	7.95461e+06	8.57599e+06	1.1547e+07	7.11767e+06	4.20709e+06	6.35946e+06	6.40234e+06	6.26404e+06
Q9R1V4	Disintegrin and metalloproteinase domain-containing protein 11 [OS=Mus musculus]	Adam11	4.50909e+06	3.47701e+06	3.19041e+06	3.34349e+06	2.94197e+06	3.79291e+06	3.52255e+06	3.03398e+06	4.56621e+06	4.29068e+06	3.75251e+06	3.35536e+06
Q8CCB4	Vacuolar protein sorting-associated protein 53 homolog [OS=Mus musculus]	Vps53	2.93526e+06	3.01109e+06	3.01504e+06	3.25591e+06	2.93642e+06	2.6938e+06	3.55077e+06	3.86069e+06	3.71434e+06	3.34866e+06	2.94715e+06	2.91924e+06
Q9D892	Inosine triphosphate pyrophosphatase [OS=Mus musculus]	Itpa	4.93283e+06	5.33671e+06	5.06599e+06	5.18093e+06	6.39156e+06	5.51673e+06	5.92841e+06	5.63108e+06	6.08001e+06	5.81703e+06	5.21159e+06	5.82594e+06
Q6KAR6	Exocyst complex component 3 [OS=Mus musculus]	Exoc3	3.22159e+06	3.44227e+06	2.60541e+06	2.48123e+06	2.28348e+06	2.9257e+06	3.21672e+06	2.62565e+06	3.32721e+06	2.9944e+06	2.61934e+06	3.3042e+06
Q8CAY6	Acetyl-CoA acetyltransferase, cytosolic [OS=Mus musculus]	Acat2	3.28059e+06	4.47526e+06	4.2065e+06	4.76159e+06	4.7549e+06	5.53634e+06	5.7218e+06	5.67746e+06	5.88398e+06	5.79464e+06	5.73946e+06	5.31781e+06
Q8K3H0	DCC-interacting protein 13-alpha [OS=Mus musculus]	Appl1	5.09142e+06	5.07291e+06	5.60228e+06	5.35817e+06	4.64251e+06	5.39297e+06	5.67304e+06	6.05324e+06	6.73611e+06	6.70783e+06	5.77456e+06	5.62106e+06
Q91ZR1	Ras-related protein Rab-4B [OS=Mus musculus]	Rab4b	1.33178e+07	1.2006e+07	1.36342e+07	1.41803e+07	1.26879e+07	1.23272e+07	1.41574e+07	1.32585e+07	1.38549e+07	1.44419e+07	1.44898e+07	1.40677e+07
Q8C1A5	Thimet oligopeptidase [OS=Mus musculus]	Thop1	3.44355e+06	4.05049e+06	2.68503e+06	3.02185e+06	3.42183e+06	3.40093e+06	3.39357e+06	2.70112e+06	3.63204e+06	3.96489e+06	3.63909e+06	2.63279e+06
Q99L47	Hsc70-interacting protein [OS=Mus musculus]	St13	2.21399e+07	1.94362e+07	1.78294e+07	1.94966e+07	2.05979e+07	2.15413e+07	2.07829e+07	1.98852e+07	1.81255e+07	2.03897e+07	2.01419e+07	1.8356e+07
O88746	Target of Myb protein 1 [OS=Mus musculus]	Tom1	1.27076e+06	1.80243e+06	1.57782e+06	1.19597e+06	1.29226e+06	1.63132e+06	1.28174e+06	1.93348e+06	2.07425e+06	1.97148e+06	2.11901e+06	2.56294e+06
P54763	Ephrin type-B receptor 2 [OS=Mus musculus]	Ephb2	3.38663e+06	2.41116e+06	2.19506e+06	2.82089e+06	2.1522e+06	1.43055e+06	2.88576e+06	2.41274e+06	3.21386e+06	1.91572e+06	2.16714e+06	2.44515e+06
P63044	Vesicle-associated membrane protein 2 [OS=Mus musculus]	Vamp2	1.75561e+08	1.78744e+08	1.79837e+08	1.66303e+08	1.51811e+08	1.60872e+08	1.58976e+08	157625744	1.6232e+08	1.79021e+08	1.90148e+08	1.71021e+08
Q8BW75	Amine oxidase [flavin-containing] B [OS=Mus musculus]	Maob	2.75193e+06	2.96082e+06	3.56019e+06	3.48448e+06	2.69463e+06	1.79496e+06	2.94405e+06	2.76674e+06	2.95816e+06	2.50131e+06	3.7723e+06	2.88413e+06
Q9EQP2	EH domain-containing protein 4 [OS=Mus musculus]	Ehd4	2.16871e+06	2.71152e+06	1.5228e+06	2.03719e+06	3.75712e+06	3.72164e+06	3.8695e+06	4.41296e+06	2.53306e+06	3.84312e+06	2.78076e+06	3.48564e+06
Q9JJY3	Sphingomyelin phosphodiesterase 3 [OS=Mus musculus]	Smpd3	5.05443e+06	5.01233e+06	4.79692e+06	4.57469e+06	4.66557e+06	4.52049e+06	4.36013e+06	4.89174e+06	5.80063e+06	5.54417e+06	4.63733e+06	5.55702e+06
Q80TV8	CLIP-associating protein 1 [OS=Mus musculus]	Clasp1	806088	558640	1.0794e+06	657916	630587	422874	658923	700638	703392	718259	811264	726046
Q80U40	RIMS-binding protein 2 [OS=Mus musculus]	Rimbp2	9.95954e+06	9.68065e+06	9.90145e+06	7.65029e+06	8.49127e+06	8.00939e+06	8.22569e+06	6.50667e+06	7.73168e+06	9.28348e+06	8.45146e+06	8.02072e+06
P35279	Ras-related protein Rab-6A [OS=Mus musculus]	Rab6a	2.6862e+07	2.56812e+07	2.75831e+07	2.68588e+07	2.66461e+07	2.98914e+07	2.615e+07	2.57799e+07	2.65176e+07	2.3485e+07	2.57522e+07	22991945
Q8CHX7	Raftlin-2 [OS=Mus musculus]	Rftn2	1.24786e+07	1.06025e+07	4.41016e+06	1.02925e+07	1.18204e+07	1.38947e+07	1.20356e+07	1.04725e+07	1.21601e+07	1.28796e+07	1.05057e+07	10096782
P43024	Cytochrome c oxidase subunit 6A1, mitochondrial [OS=Mus musculus]	Cox6a1	1.79729e+07	2.06323e+07	2.30519e+07	1.95442e+07	1.52667e+07	3.11003e+06	1.07207e+07	1.68874e+07	1.43802e+07	1.81587e+07	1.90211e+07	2.73373e+07
Q80WM4	Hyaluronan and proteoglycan link protein 4 [OS=Mus musculus]	Hapln4	3.69304e+06	3.73838e+06	4.13372e+06	4.27265e+06	3.48266e+06	5.10837e+06	3.95776e+06	3.37616e+06	2.4899e+06	2.02517e+06	1.50136e+06	2.04525e+06
P29788	Vitronectin [OS=Mus musculus]	Vtn	4.19596e+06	6.24369e+06	4.52223e+06	4.44553e+06	1.40725e+07	7.36233e+06	1.23358e+07	8.70301e+06	310123	145637	432315	318190
P49615	Cyclin-dependent kinase 5 [OS=Mus musculus]	Cdk5	1.0581e+07	1.14471e+07	1.05944e+07	1.05936e+07	1.11625e+07	9.56352e+06	1.09801e+07	1.13425e+07	1.14743e+07	1.15512e+07	1.23851e+07	1.18593e+07
P62812	Gamma-aminobutyric acid receptor subunit alpha-1 [OS=Mus musculus]	Gabra1	2.13718e+07	2.09717e+07	2.24405e+07	2.12868e+07	1.90728e+07	2.09619e+07	1.97076e+07	1.91553e+07	2.08653e+07	2.09133e+07	1.9259e+07	2.00636e+07
Q9Z0X1	Apoptosis-inducing factor 1, mitochondrial [OS=Mus musculus]	Aifm1	2.5574e+06	6.3221e+06	5.48468e+06	5.80128e+06	6.20422e+06	4.90009e+06	6.32061e+06	5.32894e+06	5.04745e+06	5.78918e+06	6.16425e+06	4.32622e+06
P68037	Ubiquitin-conjugating enzyme E2 L3 [OS=Mus musculus]	Ube2l3	7.88876e+06	8.48484e+06	6.55039e+06	8.79144e+06	8.40216e+06	9.95146e+06	7.68481e+06	8.6311e+06	8.41057e+06	9.96479e+06	8.95535e+06	8.71846e+06
Q6P2B1	Transportin-3 [OS=Mus musculus]	Tnpo3	2.17606e+06	2.27463e+06	2.0614e+06	2.43062e+06	2.19454e+06	2.25134e+06	2.30311e+06	2.87161e+06	2.69002e+06	2.26778e+06	2.70035e+06	2.37042e+06
Q6NS52	Diacylglycerol kinase beta [OS=Mus musculus]	Dgkb	5.77407e+06	3.05556e+06	3.05308e+06	3.32684e+06	3.05302e+06	6.06894e+06	2.90953e+06	3.66835e+06	6.40138e+06	7.60871e+06	5.3917e+06	5.58919e+06
Q9JKF6	Nectin-1 [OS=Mus musculus]	Nectin1	1.37209e+07	1.71036e+07	1.72248e+07	1.69606e+07	1.35378e+07	1.9933e+07	1.40425e+07	1.39455e+07	2.03802e+07	1.73946e+07	1.86559e+07	1.75884e+07
Q6P5F6	Zinc transporter ZIP10 [OS=Mus musculus]	Slc39a10	5.24757e+06	4.95735e+06	5.56035e+06	4.521e+06	4.73235e+06	5.18832e+06	5.00163e+06	4.57429e+06	5.98711e+06	5.51394e+06	4.9321e+06	5.09149e+06
O35239	Tyrosine-protein phosphatase non-receptor type 9 [OS=Mus musculus]	Ptpn9	4.43135e+06	3.9074e+06	4.25963e+06	3.80798e+06	3.98782e+06	4.10703e+06	3.59111e+06	4.46885e+06	3.79696e+06	4.34388e+06	4.10159e+06	4.01679e+06
O08756	3-hydroxyacyl-CoA dehydrogenase type-2 [OS=Mus musculus]	Hsd17b10	3.74622e+06	4.14772e+06	4.27509e+06	3.75463e+06	3.74825e+06	3.04563e+06	3.83513e+06	4.23222e+06	3.77384e+06	3.47789e+06	4.18285e+06	4.48552e+06
Q9CQA3	Succinate dehydrogenase [ubiquinone] iron-sulfur subunit, mitochondrial [OS=Mus musculus]	Sdhb	3.33666e+07	3.26684e+07	3.22436e+07	2.95892e+07	3.29937e+07	3.00842e+07	3.12187e+07	2.83062e+07	2.89524e+07	3.6272e+07	3.27446e+07	3.39405e+07
P50571	Gamma-aminobutyric acid receptor subunit beta-1 [OS=Mus musculus]	Gabrb1	2.94223e+06	3.01325e+06	3.07722e+06	3.41828e+06	2.30404e+06	2.77061e+06	2.80428e+06	2.42697e+06	3.48929e+06	3.24039e+06	3.78405e+06	3.10838e+06
P97445	Voltage-dependent P/Q-type calcium channel subunit alpha-1A [OS=Mus musculus]	Cacna1a	3.79784e+06	3.27216e+06	3.63894e+06	3.70731e+06	3.28029e+06	3.11014e+06	3.20463e+06	3.1713e+06	2.98332e+06	2.23837e+06	2.71111e+06	2.95011e+06
Q6PB44	Tyrosine-protein phosphatase non-receptor type 23 [OS=Mus musculus]	Ptpn23	1.48569e+06	1.40702e+06	1.3885e+06	1.07475e+06	1.57281e+06	1.57415e+06	1.84972e+06	1.74365e+06	1.49636e+06	1.55734e+06	1.94134e+06	1.34802e+06
Q61831	Mitogen-activated protein kinase 10 [OS=Mus musculus]	Mapk10	1.61692e+07	1.66283e+07	1.51312e+07	1.64941e+07	1.62741e+07	1.29558e+07	1.81493e+07	1.44901e+07	1.38713e+07	1.4238e+07	1.80715e+07	1.49186e+07
Q9ERE2	Keratin, type II cuticular Hb1 [OS=Mus musculus]	Krt81	386705	47694.6	342521	24404.7		41619.4		9.34561e+06
P70349	Adenosine 5'-monophosphoramidase HINT1 [OS=Mus musculus]	Hint1	2.02619e+07	1.97116e+07	1.99238e+07	2.17561e+07	1.95604e+07	2.01322e+07	2.1982e+07	2.11203e+07	2.13087e+07	2.29741e+07	2.24657e+07	2.11676e+07
P23953	Carboxylesterase 1C [OS=Mus musculus]	Ces1c	6.87217e+06	6.70986e+06	6.12646e+06	6.13227e+06	6.28873e+06	5.27457e+06	5.7862e+06	6.18643e+06	3.14898e+06	2.22792e+06	1.74305e+06	2.26274e+06
Q5F2E8	Serine/threonine-protein kinase TAO1 [OS=Mus musculus]	Taok1	7.40021e+06	7.07831e+06	6.52883e+06	7.1801e+06	7.99776e+06	7.97726e+06	7.82629e+06	7.0402e+06	7.17458e+06	7.36396e+06	7.82734e+06	7.26121e+06
Q8CGC7	Bifunctional glutamate/proline--tRNA ligase [OS=Mus musculus]	Eprs1	2.27232e+06	2.62789e+06	1.71654e+06	2.2516e+06	2.35246e+06	2.22458e+06	2.5827e+06	3.44324e+06	1.92519e+06	3.41315e+06	2.28126e+06	1.75802e+06
Q07076	Annexin A7 [OS=Mus musculus]	Anxa7	9.95249e+06	1.15778e+07	1.02647e+07	1.00989e+07	1.2314e+07	1.49925e+07	1.33781e+07	1.06801e+07	9.64792e+06	1.01646e+07	1.05024e+07	8.80316e+06
Q8BL65	Actin-binding LIM protein 2 [OS=Mus musculus]	Ablim2	6.3302e+06	6.81924e+06	6.88405e+06	5.24764e+06	6.28303e+06	6.38119e+06	6.11713e+06	6.02283e+06	5.14822e+06	5.78632e+06	6.65792e+06	7.11956e+06
Q9D3A9	Protein tweety homolog 1 [OS=Mus musculus]	Ttyh1	2.1593e+07	2.31924e+07	2.02434e+07	2.13381e+07	1.67794e+07	1.89834e+07	1.82809e+07	2.08252e+07	24273075	2.37897e+07	2.35429e+07	2.46734e+07
Q9D7X3	Dual specificity protein phosphatase 3 [OS=Mus musculus]	Dusp3	1.05488e+07	1.16101e+07	9.55602e+06	1.12125e+07	1.54724e+07	1.28919e+07	1.26062e+07	1.19505e+07	1.00083e+07	9.19604e+06	9.45194e+06	9.55576e+06
P29391	Ferritin light chain 1 [OS=Mus musculus]	Ftl1	2.582e+06	3.01671e+06	3.58597e+06	2.81463e+06	8.07145e+06	1.04879e+07	9.18502e+06	8.99128e+06	2.65264e+06	3.82564e+06	3.26967e+06	3.28004e+06
Q9D1G5	Leucine-rich repeat-containing protein 57 [OS=Mus musculus]	Lrrc57	1.2976e+07	1.45561e+07	1.26692e+07	1.35047e+07	1.38493e+07	1.58236e+07	1.37856e+07	1.45444e+07	1.29748e+07	1.51157e+07	1.39626e+07	1.34822e+07
Q3V3R1	Monofunctional C1-tetrahydrofolate synthase, mitochondrial [OS=Mus musculus]	Mthfd1l	1.69864e+06	1.44143e+06	1.50995e+06	1.51492e+06	1.65873e+06	1.00189e+06	1.74011e+06	1.18809e+06	1.09863e+06	621220	1.14521e+06	1.20988e+06
Q68ED2	Metabotropic glutamate receptor 7 [OS=Mus musculus]	Grm7	6.02298e+06	5.59032e+06	5.82134e+06	5.34086e+06	5.0574e+06	5.46072e+06	5.79946e+06	5.72124e+06	6.5095e+06	5.67612e+06	3.59548e+06	6.09053e+06
Q9D2G2	Dihydrolipoyllysine-residue succinyltransferase component of 2-oxoglutarate dehydrogenase complex, mitochondrial [OS=Mus musculus]	Dlst	1.74262e+07	1.82313e+07	1.87092e+07	1.90871e+07	1.5576e+07	1.20086e+07	1.66985e+07	1.67599e+07	1.4059e+07	1.69152e+07	1.79348e+07	1.6103e+07
A2APV2	Formin-like protein 2 [OS=Mus musculus]	Fmnl2	1.1138e+07	1.10729e+07	1.08381e+07	1.21994e+07	1.27898e+07	1.33186e+07	1.26878e+07	1.40412e+07	1.0992e+07	9.54834e+06	9.64967e+06	9.02759e+06
O55234	Proteasome subunit beta type-5 [OS=Mus musculus]	Psmb5	7.60535e+06	7.31092e+06	6.98726e+06	7.96212e+06	7.64841e+06	7.66704e+06	7.62701e+06	8.55937e+06	8.92343e+06	8.66542e+06	8.75941e+06	9.36434e+06
Q8BXZ1	Protein disulfide-isomerase TMX3 [OS=Mus musculus]	Tmx3	7.23891e+06	8.08729e+06	8.58813e+06	6.92011e+06	6.95463e+06	8.31082e+06	7.97348e+06	6.41991e+06	8.05982e+06	8.50982e+06	6.64881e+06	7.1084e+06
Q8CCN5	BCAS3 microtubule associated cell migration factor [OS=Mus musculus]	Bcas3	2.31849e+07	2.35336e+07	2.44512e+07	2.29223e+07	2.01657e+07	2.16983e+07	2.11137e+07	2.22346e+07	2.28651e+07	2.44818e+07	2.28974e+07	1.99371e+07
Q8BVI5	Syntaxin-16 [OS=Mus musculus]	Stx16	2.99836e+06	2.07203e+06	2.12341e+06	2.15292e+06	1.83707e+06	2.25493e+06	2.55722e+06	2.632e+06	2.59208e+06	2.84635e+06	2.80898e+06	2.30236e+06
P62069	Ubiquitin carboxyl-terminal hydrolase 46 [OS=Mus musculus]	Usp46	1.53167e+06	1.10021e+06	1.29976e+06	1.42519e+06	1.19659e+06	1.0223e+06	1.11516e+06	1.30031e+06	1.58552e+06	1.45336e+06	1.44481e+06	1.9267e+06
Q8R3S6	Exocyst complex component 1 [OS=Mus musculus]	Exoc1	1.09353e+07	9.40162e+06	1.09632e+07	8.30186e+06	9.71485e+06	1.02124e+07	1.36135e+07	9.09683e+06	1.20847e+07	5.36283e+06	7.69034e+06	8.10014e+06
Q9Z1Z2	Serine-threonine kinase receptor-associated protein [OS=Mus musculus]	Strap	8.4726e+06	8.16881e+06	7.10353e+06	6.80911e+06	8.37977e+06	7.76475e+06	8.9865e+06	6.47649e+06	6.73469e+06	8.65615e+06	7.13466e+06	6.47649e+06
Q9WVK8	Cholesterol 24-hydroxylase [OS=Mus musculus]	Cyp46a1	1.03714e+07	8.54879e+06	1.14941e+07	1.06994e+07	8.83118e+06	9.07899e+06	1.04044e+07	1.18149e+07	1.48237e+07	1.03926e+07	1.24672e+07	9.76571e+06
Q8VEK0	Cell cycle control protein 50A [OS=Mus musculus]	Tmem30a	7.16674e+06	8.23254e+06	8.03023e+06	7.92376e+06	7.61226e+06	8.23371e+06	6.7903e+06	7.24278e+06	8.84064e+06	7.8346e+06	8.51607e+06	9.42457e+06
Q9R0N5	Synaptotagmin-5 [OS=Mus musculus]	Syt5	1.02988e+07	1.17675e+07	1.14191e+07	1.133e+07	9.79706e+06	1.19562e+07	1.0032e+07	9.60569e+06	1.279e+07	1.06427e+07	1.02004e+07	1.08822e+07
O88998	Noelin [OS=Mus musculus]	Olfm1	1.17041e+07	1.01566e+07	1.16358e+07	1.22312e+07	1.04349e+07	1.12356e+07	1.0284e+07	1.04695e+07	1.13614e+07	1.11821e+07	1.14848e+07	1.32604e+07
Q7TNC9	Inositol polyphosphate-5-phosphatase A [OS=Mus musculus]	Inpp5a	8.35757e+06	5.56801e+06	7.31302e+06	7.81347e+06	6.6741e+06	6.64768e+06	7.01559e+06	6.00844e+06	7.42191e+06	6.58046e+06	7.84139e+06	5.47194e+06
Q9QUR6	Prolyl endopeptidase [OS=Mus musculus]	Prep	3.15322e+06	2.57059e+06	3.13788e+06	3.1802e+06	5.54858e+06	2.45321e+06	5.00285e+06	4.78425e+06	2.47281e+06	2.99514e+06	2.7426e+06	2.674e+06
Q8VHJ5	Serine/threonine-protein kinase MARK1 [OS=Mus musculus]	Mark1	3.0846e+06	3.15327e+06	3.58102e+06	3.70349e+06	2.99058e+06	3.9762e+06	3.60625e+06	3.04436e+06	2.83847e+06	3.11776e+06	2.75684e+06	2.76422e+06
Q62419	Endophilin-A2 [OS=Mus musculus]	Sh3gl1	4.29848e+06	4.24374e+06	3.86739e+06	4.42982e+06	3.94658e+06	3.36096e+06	4.2538e+06	3.7302e+06	3.91566e+06	4.20646e+06	3.86831e+06	4.07925e+06
P97798	Neogenin [OS=Mus musculus]		2.70874e+06	2.37963e+06	2.55044e+06	2.25546e+06	1.94135e+06	2.47399e+06	2.49722e+06	3.23132e+06	2.77543e+06	2.91842e+06	3.74381e+06	3.23065e+06
P29699	Alpha-2-HS-glycoprotein [OS=Mus musculus]	Ahsg	1.01558e+07	9.32303e+06	9.0761e+06	1.3595e+07	1.07007e+07	8.64285e+06	9.88315e+06	6.92349e+06	95727.3	47343.9	87796.3	25997.9
Q7TMF3	NADH dehydrogenase [ubiquinone] 1 alpha subcomplex subunit 12 [OS=Mus musculus]	Ndufa12	1.15285e+07	1.26377e+07	1.17556e+07	1.17925e+07	1.13457e+07	7.80101e+06	1.17964e+07	1.09625e+07	9.07614e+06	1.07652e+07	1.25304e+07	1.15702e+07
P53986	Monocarboxylate transporter 1 [OS=Mus musculus]	Slc16a1	6.97634e+06	7.12606e+06	6.85642e+06	3.71045e+06	7.87538e+06	8.59004e+06	7.50317e+06	7.39568e+06	7.61876e+06	7.15325e+06	6.69501e+06	3.03129e+06
Q9Z1R2	Large proline-rich protein BAG6 [OS=Mus musculus]	Bag6	7.30998e+06	8.08129e+06	7.37331e+06	8.09763e+06	7.3522e+06	9.84111e+06	6.66816e+06	7.30716e+06	8.26559e+06	7.99293e+06	7.87399e+06	7.1959e+06
P67871	Casein kinase II subunit beta [OS=Mus musculus]	Csnk2b	9.83084e+06	8.69033e+06	1.04261e+07	8.47351e+06	9.0957e+06	1.08012e+07	1.10233e+07	7.61771e+06	9.03859e+06	1.08571e+07	1.13543e+07	8.46601e+06
Q91VZ6	Stromal membrane-associated protein 1 [OS=Mus musculus]	Smap1	7.41071e+06	6.83654e+06	7.22356e+06	7.57871e+06	6.5339e+06	6.89102e+06	6.97588e+06	7.91126e+06	7.46111e+06	6.80933e+06	7.99828e+06	8.75499e+06
Q5H8C4	Intermembrane lipid transfer protein VPS13A [OS=Mus musculus]	Vps13a	828900	564182	645592	349370	730688	332065	997192	650684	553530	499387	892431	489518
Q0VGU4	Neurosecretory protein VGF [OS=Mus musculus]	Vgf	4.57569e+06	4.24307e+06	4.98671e+06	3.76564e+06	4.51492e+06	3.6625e+06	5.03658e+06	3.13446e+06	3.83338e+06	4.44542e+06	4.39575e+06	3.21622e+06
Q8BR92	Paralemmin-2 [OS=Mus musculus]	Palm2	7.77726e+06	7.29895e+06	7.36372e+06	7.78439e+06	4.84595e+06	6.37498e+06	5.66097e+06	5.0847e+06	7.52965e+06	8.62324e+06	7.75314e+06	7.84685e+06
P27612	Phospholipase A-2-activating protein [OS=Mus musculus]	Plaa	6.13168e+06	6.81597e+06	7.1205e+06	7.0825e+06	7.81923e+06	7.83597e+06	7.50271e+06	8.80893e+06	5.9546e+06	8.43201e+06	6.87927e+06	6.40675e+06
Q93092	Transaldolase [OS=Mus musculus]	Taldo1	1.4507e+07	1.39954e+07	1.36901e+07	1.52675e+07	1.60281e+07	1.4595e+07	1.54157e+07	1.47475e+07	1.20663e+07	1.37637e+07	1.45698e+07	1.49761e+07
Q1RLL3	Copine-9 [OS=Mus musculus]	Cpne9	609483	65197.7	444795	120935	632949	939617	668321	154666	42846.8		33627.3	57608.9
P45591	Cofilin-2 [OS=Mus musculus]	Cfl2	8.27372e+06	7.94663e+06	9.70645e+06	9.16183e+06	8.38997e+06	8.66569e+06	8.68924e+06	9.66652e+06	8.92219e+06	8.91716e+06	8.67525e+06	9.63622e+06
Q3UHK1	Proton myo-inositol cotransporter [OS=Mus musculus]	Slc2a13	5.01939e+06	6.47676e+06	5.11279e+06	7.14168e+06	7.31134e+06	7.43067e+06	7.53568e+06	5.32881e+06	6.01948e+06	5.86012e+06	6.41027e+06	5657548
O55106	Striatin [OS=Mus musculus]	Strn	5.20112e+06	5.62415e+06	5.31526e+06	5.34269e+06	5.09503e+06	4.61149e+06	5317312	4.86705e+06	5.904e+06	5.08241e+06	6.93554e+06	6.25859e+06
Q9DBG6	Dolichyl-diphosphooligosaccharide--protein glycosyltransferase subunit 2 [OS=Mus musculus]	Rpn2	2.11677e+06	2.27603e+06	1.72959e+06	2.84132e+06	2.80875e+06	2.69795e+06	3.02928e+06	2.39445e+06	1.80201e+06	1.50537e+06	2.56556e+06	1.77988e+06
Q61206	Platelet-activating factor acetylhydrolase IB subunit alpha2 [OS=Mus musculus]	Pafah1b2	1.07024e+07	1.15626e+07	1.17522e+07	1.24893e+07	1.1702e+07	1.14232e+07	1.18491e+07	1.67808e+07	1.34805e+07	1.17099e+07	9.69877e+06	1.19815e+07
Q8VCT3	Aminopeptidase B [OS=Mus musculus]	Rnpep	1.04952e+07	1.31948e+07	1.27013e+07	1.18623e+07	1.1158e+07	8.29386e+06	1.0425e+07	1.05183e+07	1.0273e+07	1.12432e+07	1.23686e+07	1.12548e+07
Q63739	Protein tyrosine phosphatase type IVA 1 [OS=Mus musculus]	Ptp4a1	1.84653e+07	2.09022e+07	2.06035e+07	2.24239e+07	2.20191e+07	2.01161e+07	2.08569e+07	2.45259e+07	7.04769e+06	7.22898e+06	4.60118e+06	5.42091e+06
Q9CR68	Cytochrome b-c1 complex subunit Rieske, mitochondrial [OS=Mus musculus]	Uqcrfs1	1.69176e+07	1.61447e+07	1.72274e+07	1.71955e+07	1.82325e+07	1.14558e+07	1.86795e+07	1.30948e+07	1.36945e+07	1.14974e+07	1.84752e+07	1.23955e+07
Q80U23	Syntaphilin [OS=Mus musculus]	Snph	1.23463e+07	1.13346e+07	9.61771e+06	1.10975e+07	1.22537e+07	1.45318e+07	1.42586e+07	1.17538e+07	9.6746e+06	9.95564e+06	1.30738e+07	7.93636e+06
Q60854	Serpin B6 [OS=Mus musculus]	Serpinb6	3.15601e+06	3.10671e+06	3.03231e+06	3.22195e+06	2.98779e+06	3.74212e+06	3.6217e+06	3.21849e+06	3.5124e+06	3.1635e+06	3.24652e+06	3.48635e+06
Q6PA06	Atlastin-2 [OS=Mus musculus]	Atl2	1.3998e+06	1.64461e+06	1.51308e+06	1.4052e+06	1.26025e+06	1.45201e+06	1.3849e+06	1.6211e+06	1.31495e+06	1.33e+06	1.6434e+06	1.50574e+06
Q6P5F7	Protein tweety homolog 3 [OS=Mus musculus]	Ttyh3	2.82866e+06	2.77361e+06	2.46366e+06	2.37613e+06	1.89951e+06	2.56727e+06	2.22041e+06	2.8426e+06	3.85235e+06	3.05319e+06	3.03287e+06	3.36539e+06
Q8VD65	Phosphoinositide 3-kinase regulatory subunit 4 [OS=Mus musculus]	Pik3r4	1.94232e+06	1.93072e+06	1.94672e+06	1.9242e+06	2.36002e+06	2.17903e+06	2.23499e+06	2.16036e+06	2.10606e+06	1.89275e+06	1.76517e+06	1.71848e+06
Q920N7	Synaptotagmin-12 [OS=Mus musculus]	Syt12	7.30323e+06	6.62463e+06	7.60209e+06	6.27552e+06	6.66578e+06	5.96446e+06	6.31065e+06	6.38795e+06	5.42242e+06	5.31999e+06	4.87421e+06	8.84627e+06
Q9JHK4	Geranylgeranyl transferase type-2 subunit alpha [OS=Mus musculus]	Rabggta	4.19127e+06	5.65698e+06	4.33772e+06	5.02087e+06	4.56362e+06	6.21698e+06	5.71865e+06	5.17692e+06	5.30098e+06	5.59543e+06	5.88349e+06	4.68187e+06
Q9R1P3	Proteasome subunit beta type-2 [OS=Mus musculus]	Psmb2	3.61154e+06	3.5682e+06	3.59656e+06	3.36045e+06	4.26036e+06	3.49076e+06	3.75378e+06	4.43184e+06	4.89354e+06	4.62604e+06	4.07254e+06	4.27037e+06
Q922B2	Aspartate--tRNA ligase, cytoplasmic [OS=Mus musculus]	Dars1	2.0241e+07	2.3776e+07	1.88552e+07	2.04611e+07	2.23658e+07	2.75391e+07	2.20863e+07	2.52032e+07	1.94851e+07	2.39466e+07	2.46756e+07	2.28543e+07
Q9D0R2	Threonine--tRNA ligase 1, cytoplasmic [OS=Mus musculus]	Tars1	1.86812e+06	2.84112e+06	2.25349e+06	2.61143e+06	2.52155e+06	2.60432e+06	2.3567e+06	2.86211e+06	2.81289e+06	2.34343e+06	2.66107e+06	2.42178e+06
P29341	Polyadenylate-binding protein 1 [OS=Mus musculus]	Pabpc1	4.76311e+06	7.16109e+06	4.21884e+06	4.3693e+06	4.88369e+06	4.56825e+06	4.9907e+06	5.07685e+06	5.29812e+06	5.61008e+06	4.60478e+06	8.45843e+06
P35282	Ras-related protein Rab-21 [OS=Mus musculus]	Rab21	4.01104e+07	3.92289e+07	3.30739e+07	4.65476e+07	4.27847e+07	4.61314e+07	4.07731e+07	4.65421e+07	3.21078e+07	35167130	2.92024e+07	3.34765e+07
Q9JJV2	Profilin-2 [OS=Mus musculus]	Pfn2	2.30666e+07	2.85506e+07	2.46908e+07	2.62554e+07	2.5387e+07	2.38581e+07	2.3147e+07	2.93271e+07	3.16861e+07	2.53051e+07	2.98531e+07	3.28975e+07
Q61081	Hsp90 co-chaperone Cdc37 [OS=Mus musculus]	Cdc37	5.91192e+06	8.39309e+06	6.84258e+06	6.23148e+06	5.17585e+06	6.9813e+06	6.25712e+06	9.02219e+06	8662138	8.95706e+06	7.85787e+06	1.28814e+07
O35887	Calumenin [OS=Mus musculus]	Calu	2.5573e+06	2.39529e+06	2.18427e+06	3.69112e+06	3.0425e+06	3.55123e+06	3.68743e+06	2.861e+06	2.49286e+06	3.72548e+06	4.21297e+06	2.01067e+06
P24369	Peptidyl-prolyl cis-trans isomerase B [OS=Mus musculus]	Ppib	8.25874e+06	9.47442e+06	8.19897e+06	1.17772e+07	9.99348e+06	1.36049e+07	1.39011e+07	1.16055e+07	1.14346e+07	8.05083e+06	1.11031e+07	1.33661e+07
Q6PD03	Serine/threonine-protein phosphatase 2A 56 kDa regulatory subunit alpha isoform [OS=Mus musculus]	Ppp2r5a	5.21842e+06	4.62079e+06	5.70261e+06	4.7718e+06	6.20284e+06	5.47757e+06	5.37198e+06	5.98526e+06	6.47556e+06	6.31485e+06	5.83231e+06	6.13185e+06
Q9R0H0	Peroxisomal acyl-coenzyme A oxidase 1 [OS=Mus musculus]	Acox1	1.87157e+07	2.03142e+07	1.97362e+07	1.78741e+07	1.80704e+07	2.29233e+07	1.96029e+07	2.06699e+07	2.03722e+07	1.98305e+07	1.55146e+07	1.84741e+07
Q9DB27	Malignant T-cell-amplified sequence 1 [OS=Mus musculus]	Mcts1	2.08275e+07	1.70003e+07	2.11055e+07	2.17908e+07	2.14117e+07	1.96474e+07	1.80471e+07	1.85036e+07	1.90558e+07	1.63656e+07	1.70905e+07	1.57104e+07
P62962	Profilin-1 [OS=Mus musculus]	Pfn1	2.68748e+07	3.00168e+07	2.75377e+07	2.46268e+07	2.89933e+07	3.00441e+07	3.12116e+07	3.51876e+07	3.10807e+07	2.80999e+07	3.21364e+07	3.00304e+07
Q9WTR5	Cadherin-13 [OS=Mus musculus]	Cdh13	8.32778e+06	9.71164e+06	9.13965e+06	9.4434e+06	8.68044e+06	12357664	8.01622e+06	8.87269e+06	1.47457e+07	1.77143e+07	1.55792e+07	1.70244e+07
Q61990	Poly(rC)-binding protein 2 [OS=Mus musculus]	Pcbp2	4.54359e+06	5.38454e+06	4.25223e+06	4.48531e+06	5.16059e+06	5.23247e+06	5.25051e+06	5.01657e+06	4.97853e+06	4.99924e+06	5.49402e+06	5.04535e+06
Q8VHW2	Voltage-dependent calcium channel gamma-8 subunit [OS=Mus musculus]	Cacng8	1.39655e+07	1.40366e+07	1.08645e+07	1.06689e+07	9.05592e+06	1.19377e+07	1.14347e+07	1.07432e+07	1.25182e+07	1.10454e+07	1.52297e+07	1.45881e+07
Q9Z2W8	Glutamate receptor 4 [OS=Mus musculus]	Gria4	532577	725364	928754	796957	586224	617729	772498	541184	792376	489459	672450	716097
Q62059	Versican core protein [OS=Mus musculus]	Vcan	5.86538e+06	4.78e+06	3.51768e+06	4.41707e+06	4.62814e+06	5.66369e+06	3.60298e+06	4.30114e+06	3.54714e+06	4.58789e+06	3.15377e+06	3.97289e+06
Q8VED9	Galectin-related protein [OS=Mus musculus]	Lgalsl	7.55207e+06	7.59889e+06	8.62538e+06	8.45511e+06	7.56641e+06	1.28258e+07	8.30913e+06	1.13545e+07	6.80966e+06	9.39626e+06	1.06113e+07	7.13126e+06
Q3UHD6	Sorting nexin-27 [OS=Mus musculus]	Snx27	3.77112e+06	4.53452e+06	4.32374e+06	3.77526e+06	4.4407e+06	4.60908e+06	4.5672e+06	4.51908e+06	5.10879e+06	3.73042e+06	5.25817e+06	4.27484e+06
O55023	Inositol monophosphatase 1 [OS=Mus musculus]	Impa1	1.09936e+07	1.54634e+07	1.49007e+07	1.61107e+07	1.15744e+07	1.39398e+07	1.24726e+07	1.26564e+07	1.03719e+07	1.15346e+07	1.12364e+07	1.03374e+07
Q8BHL3	TBC1 domain family member 10B [OS=Mus musculus]	Tbc1d10b	6.67285e+06	6.82296e+06	6.69113e+06	6.93157e+06	6.00414e+06	6.82303e+06	7.14326e+06	5.59403e+06	7.17493e+06	8.29437e+06	7.5454e+06	7.4629e+06
Q8BIG7	Catechol O-methyltransferase domain-containing protein 1 [OS=Mus musculus]	Comtd1	1.45343e+06	1.50719e+06	1.62605e+06	1.70676e+06	1.25211e+06	1.10831e+06	1.52307e+06	1.48312e+06	1.60246e+06	1.66997e+06	1.69556e+06	1.83829e+06
Q99JY8	Phospholipid phosphatase 3 [OS=Mus musculus]	Plpp3	1.83948e+07	1.88128e+07	1.50001e+07	1.55942e+07	1.52249e+07	1.8229e+07	1.63408e+07	1.59199e+07	2.60863e+07	2.27878e+07	2.23055e+07	2.1418e+07
P22723	Gamma-aminobutyric acid receptor subunit gamma-2 [OS=Mus musculus]	Gabrg2	5.22686e+06	4.47944e+06	4.93161e+06	4.91166e+06	4.16e+06	3.7724e+06	4.07599e+06	4.54389e+06	6.27863e+06	5.43303e+06	5.01059e+06	5.63329e+06
Q9WTL7	Acyl-protein thioesterase 2 [OS=Mus musculus]	Lypla2	5.29547e+06	5.62371e+06	5.31586e+06	5.72944e+06	5.5574e+06	5.9678e+06	6.40542e+06	6.19779e+06	5.72004e+06	5.63024e+06	4.80763e+06	6.44941e+06
Q61037	Tuberin [OS=Mus musculus]	Tsc2	1.23366e+06	1.31923e+06	1.43658e+06	1.65392e+06	1.42098e+06	1.08997e+06	1.48764e+06	1.81844e+06	1.62482e+06	1.7183e+06	1.67528e+06	1.65288e+06
P46664	Adenylosuccinate synthetase isozyme 2 [OS=Mus musculus]	Adss2	4.05255e+06	4.95238e+06	4.56032e+06	4.87223e+06	5.16039e+06	4.81141e+06	5.31543e+06	4.68273e+06	4.66479e+06	5.59791e+06	5.32426e+06	4.91513e+06
Q9D7N9	Adipocyte plasma membrane-associated protein [OS=Mus musculus]	Apmap	3.50961e+06	3.73951e+06	3.4202e+06	4.45416e+06	3.62216e+06	3.59919e+06	3.67423e+06	4.72006e+06	3.28661e+06	2.95824e+06	3.82497e+06	3.60867e+06
Q62421	Endophilin-A3 [OS=Mus musculus]	Sh3gl3	3.95992e+06	4.30692e+06	4.21434e+06	4.705e+06	4.05549e+06	4.01104e+06	4.04603e+06	4.08258e+06	4.37309e+06	4.5819e+06	5.17248e+06	4.57497e+06
P70297	Signal transducing adapter molecule 1 [OS=Mus musculus]	Stam	6.49177e+07	6.05718e+07	7.16929e+07	6.55316e+07	6.12227e+07	6.69534e+07	6.03609e+07	6.39588e+07	6.58801e+07	8.73652e+07	6.34544e+07	7.00615e+07
Q80TQ2	Ubiquitin carboxyl-terminal hydrolase CYLD [OS=Mus musculus]	Cyld	3.9766e+06	4.00686e+06	4.30273e+06	4.52119e+06	4.15e+06	5.3648e+06	4.77409e+06	4.02286e+06	4.85925e+06	4.30723e+06	5.71133e+06	3.95893e+06
Q5M8N0	CB1 cannabinoid receptor-interacting protein 1 [OS=Mus musculus]	Cnrip1	1.3298e+07	1.33712e+07	1.37269e+07	1.22655e+07	1.20319e+07	1.49417e+07	1.19798e+07	1.59093e+07	1.5691e+07	1.7825e+07	1.78902e+07	2.15184e+07
Q9JM14	5'(3')-deoxyribonucleotidase, cytosolic type [OS=Mus musculus]	Nt5c	8.24913e+06	7.06837e+06	7.60849e+06	9.56572e+06	5.61346e+06	5.74352e+06	4.92734e+06	8.13929e+06	1.12848e+07	1.04423e+07	8.6561e+06	1.26718e+07
Q9D415	Disks large-associated protein 1 [OS=Mus musculus]	Dlgap1	5.10017e+06	4.46125e+06	4.52844e+06	3.79192e+06	4.33195e+06	2.99845e+06	4.7569e+06	4.06438e+06	6.06263e+06	4.97239e+06	6.67469e+06	4.68883e+06
Q8BIK4	Dedicator of cytokinesis protein 9 [OS=Mus musculus]	Dock9	820036	865356	589032	514854	446243	705497	441394	597678	920460	860639	1.12251e+06	910656
Q9D1K2	V-type proton ATPase subunit F [OS=Mus musculus]	Atp6v1f	2.14527e+07	1.99637e+07	1.94544e+07	2.02651e+07	2.18936e+07	1.81668e+07	1.86151e+07	1.56423e+07	1.62202e+07	1.70647e+07	1.4925e+07	1.98143e+07
Q6PGF7	Exocyst complex component 8 [OS=Mus musculus]	Exoc8	3.56673e+06	3.65159e+06	3.40978e+06	3.52242e+06	3.18365e+06	3.75866e+06	4.45432e+06	3.43674e+06	3.92432e+06	3.94869e+06	3.52668e+06	4.02553e+06
Q9CPU0	Lactoylglutathione lyase [OS=Mus musculus]	Glo1	3.00123e+08	3.35537e+08	2.79172e+08	3.05705e+08	3.28471e+08	3.30346e+08	295987460	2.74328e+08	2.71655e+08	350781649	2.81004e+08	2.84457e+08
O55026	Ectonucleoside triphosphate diphosphohydrolase 2 [OS=Mus musculus]	Entpd2	5.06287e+06	3.40878e+06	3.29269e+06	2.95517e+06	4.71434e+06	5.58257e+06	5.44633e+06	5.68911e+06	7.52578e+06	8.29796e+06	7.16132e+06	6.49811e+06
P35283	Ras-related protein Rab-12 [OS=Mus musculus]	Rab12	3.36312e+06	3.75776e+06	3.64772e+06	3.50675e+06	3.71433e+06	4.05477e+06	3.88214e+06	3.77635e+06	4.11021e+06	3.72246e+06	3.32353e+06	3.68802e+06
Q99MI1	ELKS/Rab6-interacting/CAST family member 1 [OS=Mus musculus]	Erc1	2.94332e+06	3.57806e+06	3.10486e+06	2.39997e+06	2.19147e+06	3.02162e+06	4.125e+06	6.4535e+06	2.58836e+06	3.32154e+06	2.91713e+06	4.99357e+06
Q91XU3	Phosphatidylinositol 5-phosphate 4-kinase type-2 gamma [OS=Mus musculus]	Pip4k2c	3.70414e+06	3.30736e+06	3.47163e+06	3.37277e+06	4.28449e+06	3.37433e+06	3.80127e+06	3.54457e+06	3.61807e+06	2.98801e+06	3.14064e+06	3.56915e+06
P99026	Proteasome subunit beta type-4 [OS=Mus musculus]	Psmb4	5.40109e+06	5.64751e+06	5.46439e+06	6.01837e+06	5.95874e+06	6.47772e+06	6.09096e+06	6.50368e+06	6.73212e+06	6.45903e+06	6.19013e+06	5.84694e+06
Q9CRY7	Lysophospholipase D GDPD1 [OS=Mus musculus]	Gdpd1	2.23864e+07	2.06553e+07	1.96278e+07	2.588e+07	2.52005e+07	26957957	2.56147e+07	1.65459e+07	2.46396e+07	2.02435e+07	2.1567e+07	1.86507e+07
P35762	CD81 antigen [OS=Mus musculus]	Cd81	3.98098e+07	3.14094e+07	2.78925e+07	2.40608e+07	3.6267e+07	4.07077e+07	3.26118e+07	2.80809e+07	4.24818e+07	4.28959e+07	3.32037e+07	2.99868e+07
P49722	Proteasome subunit alpha type-2 [OS=Mus musculus]	Psma2	3.4379e+06	3.0808e+06	3.14495e+06	3.85059e+06	3.54765e+06	2.94656e+06	3.00969e+06	3.92435e+06	3.97681e+06	3.39456e+06	3.61188e+06	4.08461e+06
Q8BQP9	Regulator of G-protein signaling 7-binding protein [OS=Mus musculus]	Rgs7bp	5.08387e+06	5.70261e+06	5.59606e+06	6.7094e+06	5.01598e+06	5.10464e+06	5.56409e+06	5.80221e+06	6.05096e+06	6.05488e+06	4.44722e+06	5.70752e+06
P08003	Protein disulfide-isomerase A4 [OS=Mus musculus]	Pdia4	5.65682e+06	6.51366e+06	6.29634e+06	6.16098e+06	7.94563e+06	8.40424e+06	9.51807e+06	7.80481e+06	6.71947e+06	5.42907e+06	7.21554e+06	6.22812e+06
Q9QZ06	Toll-interacting protein [OS=Mus musculus]	Tollip	9.27435e+06	8.92962e+06	8.64025e+06	8.91399e+06	8.3171e+06	9.32251e+06	9.15303e+06	9.49713e+06	8.32227e+06	8.28266e+06	9.56067e+06	9.20766e+06
Q9QY76	Vesicle-associated membrane protein-associated protein B [OS=Mus musculus]	Vapb	5.31678e+07	4.96705e+07	5.21322e+07	5.11849e+07	4.99386e+07	4.86248e+07	4.96972e+07	4.79182e+07	4.84985e+07	4.80192e+07	4.39582e+07	4.73244e+07
O08795	Glucosidase 2 subunit beta [OS=Mus musculus]	Prkcsh	4.13366e+06	3.7705e+06	4.15294e+06	4.22327e+06	5.5997e+06	6.29942e+06	6.16406e+06	5.18234e+06	4.33053e+06	3.86106e+06	5.61313e+06	3.36729e+06
Q8C7M3	E3 ubiquitin-protein ligase TRIM9 [OS=Mus musculus]	Trim9	3.60163e+06	3.50422e+06	3.82976e+06	3.21923e+06	3.19333e+06	2.93971e+06	3.27444e+06	3.4755e+06	3.50245e+06	3.61747e+06	3.76309e+06	3.7856e+06
Q68FM6	Protein phosphatase 1 regulatory subunit 29 [OS=Mus musculus]	Elfn2	4.65369e+06	5.49951e+06	5.37466e+06	4.37346e+06	4.52642e+06	4.19555e+06	4.59665e+06	4.90593e+06	5.16583e+06	5.4075e+06	6.39325e+06	5.73356e+06
Q9D9M2	Ubiquitin carboxyl-terminal hydrolase 12 [OS=Mus musculus]	Usp12	303801	255275	242054	303128			383285	343234	275468	206271	201939	169944
Q3UHB1	5'-nucleotidase domain-containing protein 3 [OS=Mus musculus]	Nt5dc3	5.5139e+06	6.79265e+06	6.29591e+06	5.15799e+06	4.151e+06	4.01561e+06	4.62668e+06	4.61064e+06	5.25173e+06	5.37834e+06	7.3535e+06	6.33788e+06
P55258	Ras-related protein Rab-8A [OS=Mus musculus]	Rab8a	3.0709e+06	1.70441e+06	3.06642e+06	1.9289e+06	3.71759e+06	1.50035e+06	3.51364e+06	2.14554e+06	2.74955e+06	2.28781e+06	3.14134e+06	2.25958e+06
O88741	Ganglioside-induced differentiation-associated protein 1 [OS=Mus musculus]	Gdap1	1.69295e+07	3.77917e+07	4.15719e+07	5.40439e+07	3.75062e+07	6.87205e+06	1.69146e+07	5.39657e+07	8.99118e+06	1.08972e+07	3.57573e+07	3.66633e+07
Q8R127	Saccharopine dehydrogenase-like oxidoreductase [OS=Mus musculus]	Sccpdh	1.51239e+06	1.09796e+06	1.33408e+06	1.72512e+06	1.83893e+06	812028	1.78942e+06	1.68116e+06	1.61105e+06	1.22734e+06	2.08658e+06	1.85475e+06
Q64133	Amine oxidase [flavin-containing] A [OS=Mus musculus]	Maoa	4.27399e+06	3.79322e+06	4.60693e+06	3.8158e+06	4.15906e+06	3.0053e+06	4.67173e+06	2.83066e+06	4.72214e+06	4.3487e+06	4.72111e+06	4.55042e+06
Q9WTT4	V-type proton ATPase subunit G 2 [OS=Mus musculus]	Atp6v1g2	2.83197e+07	2.43918e+07	2.39873e+07	2.43768e+07	2.84939e+07	2.9662e+07	32069514	2.482e+07	2.44229e+07	1.96728e+07	2.26305e+07	1.87758e+07
Q8C3W1	Uncharacterized protein C1orf198 homolog [OS=Mus musculus]		1.36723e+07	1.37915e+07	1.37099e+07	1.37441e+07	1.33559e+07	1.46818e+07	1.17904e+07	1.1851e+07	18191770	1.69336e+07	1.56607e+07	1.41791e+07
Q9EPK7	Exportin-7 [OS=Mus musculus]	Xpo7	1.93433e+06	2.37602e+06	2.13292e+06	1.85671e+06	2.37928e+06	2.1842e+06	2.23449e+06	2.57177e+06	1.86653e+06	1.9325e+06	2.44302e+06	2.20177e+06
Q3UTJ2	Sorbin and SH3 domain-containing protein 2 [OS=Mus musculus]	Sorbs2	3.90209e+06	4.04036e+06	4.52456e+06	5.15588e+06	3.40813e+06	2.6773e+06	4.33835e+06	4.71878e+06	3.6865e+06	3.71291e+06	5.78948e+06	5.89876e+06
Q8BJU0	Small glutamine-rich tetratricopeptide repeat-containing protein alpha [OS=Mus musculus]	Sgta	3.68499e+06	3.80555e+06	3.63965e+06	3.87821e+06	4.47562e+06	4.04112e+06	3.90381e+06	3.39688e+06	4.80206e+06	5.20932e+06	4.25659e+06	4.26965e+06
Q9JIF7	Coatomer subunit beta [OS=Mus musculus]	Copb1	1.95829e+06	1.85026e+06	1.84361e+06	1.73168e+06	2.02243e+06	1.94468e+06	2.67939e+06	2.07612e+06	1.74338e+06	1.26835e+06	1.99328e+06	2.20093e+06
O88587	Catechol O-methyltransferase [OS=Mus musculus]	Comt	1.95741e+06	1.55503e+06	1.67375e+06	1.90413e+06	1.44988e+06	1.71381e+06	1.82619e+06	2.19401e+06	1.71052e+06	1.50067e+06	1.63228e+06	1.93582e+06
P98203	Armadillo repeat protein deleted in velo-cardio-facial syndrome homolog [OS=Mus musculus]	Arvcf	1.45887e+06	1.4343e+06	1.46766e+06	1.70051e+06	1.58403e+06	1.29027e+06	1.05098e+06	1.28862e+06	1.23392e+06	1.34755e+06	1.3637e+06	2.10909e+06
Q64727	Vinculin [OS=Mus musculus]	Vcl	2.49515e+06	2.48786e+06	2.38805e+06	1.67484e+06	2.46282e+06	3.14762e+06	3.12712e+06	4.17731e+06	2.40793e+06	2.80289e+06	2.10504e+06	1.84751e+06
Q62048	Astrocytic phosphoprotein PEA-15 [OS=Mus musculus]	Pea15	1.02164e+07	8.23949e+06	8.93624e+06	8.21738e+06	8.9065e+06	6.63851e+06	8.64864e+06	8.02235e+06	9.36064e+06	1.26739e+07	9.88372e+06	1.28076e+07
P54822	Adenylosuccinate lyase [OS=Mus musculus]	Adsl	3.75675e+06	4.14538e+06	4.31788e+06	4.20857e+06	4.15592e+06	4.47645e+06	4.73688e+06	4.7109e+06	3.6199e+06	3.89956e+06	4.08714e+06	4.07543e+06
P08228	Superoxide dismutase [Cu-Zn] [OS=Mus musculus]	Sod1	5.5795e+07	5.77747e+07	5.63215e+07	6.50411e+07	7.11401e+07	7.68992e+07	6.02443e+07	6.51521e+07	6.53339e+07	6.87168e+07	6.25538e+07	5.79554e+07
Q6P1B1	Xaa-Pro aminopeptidase 1 [OS=Mus musculus]	Xpnpep1	2.19601e+07	17527216	2.14011e+07	2.3529e+07	2.43098e+07	1.97425e+07	2.4595e+07	2.26879e+07	1.77236e+07	1.92994e+07	1.61056e+07	2.03181e+07
Q8R3Z5	Voltage-dependent L-type calcium channel subunit beta-1 [OS=Mus musculus]	Cacnb1	1.72594e+06	1.09362e+06	1.63036e+06	1.45115e+06	1.61022e+06	1.12667e+06	1.14074e+06	1.32684e+06	1.21337e+06	1.29139e+06	1.85278e+06	1.68485e+06
Q64674	Spermidine synthase [OS=Mus musculus]	Srm	2.10842e+06	2.23668e+06	1.67077e+06	2.31408e+06	2.70599e+06	2.7729e+06	3.04571e+06	2.54467e+06	2.08543e+06	2.07803e+06	2.15452e+06	2.16478e+06
P28271	Cytoplasmic aconitate hydratase [OS=Mus musculus]	Aco1	2.35643e+06	2.3756e+06	2.39224e+06	2.40134e+06	2.12029e+06	2.19028e+06	2.13324e+06	2.28204e+06	2.59342e+06	2.92953e+06	2.83593e+06	1.5936e+06
Q8VBZ3	Cleft lip and palate transmembrane protein 1 homolog [OS=Mus musculus]	Clptm1	1.72462e+06	2.16667e+06	3.04799e+06	1.51248e+06	2.12661e+06	2.38597e+06	2.15505e+06	2.5283e+06	3.44637e+06	2.22399e+06	3.64817e+06	1.69302e+06
Q3UH66	Serine/threonine-protein kinase WNK2 [OS=Mus musculus]	Wnk2	1.81454e+06	1.82323e+06	2.18243e+06	1.49584e+06	1.81061e+06	1.97841e+06	1.84192e+06	2.04268e+06	2.438e+06	2.45298e+06	2.10938e+06	2.30769e+06
Q91VE0	Long-chain fatty acid transport protein 4 [OS=Mus musculus]	Slc27a4	3.15585e+06	2.40159e+06	3.71583e+06	3.02847e+06	3.16966e+06	2.66633e+06	2.83293e+06	4.92102e+06	3.05588e+06	2.96461e+06	3.0961e+06	2.83198e+06
Q8JZQ2	AFG3-like protein 2 [OS=Mus musculus]	Afg3l2	2.8586e+06	2.90341e+06	3.15395e+06	2.80358e+06	3.51073e+06	2.23231e+06	3.05173e+06	2.32495e+06	2.32316e+06	2.95999e+06	3.26749e+06	2.26337e+06
D3YZI9	PiggyBac transposable element-derived protein 5 [OS=Mus musculus]	Pgbd5	2.02452e+06	1.83085e+06	1.69512e+06	2.06209e+06	2.05894e+06	2.09346e+06	1.4407e+06	2.01247e+06	2.33387e+06	1.31142e+06	1.90198e+06	2.07361e+06
P14869	60S acidic ribosomal protein P0 [OS=Mus musculus]	Rplp0	2.39908e+07	4.54904e+06	2.6833e+07	4.83864e+06	5.42349e+06	2.27672e+07	2.73601e+07	6.13951e+06	2.40563e+07	2.28193e+07	2.68273e+07	2.72235e+07
Q9D4H1	Exocyst complex component 2 [OS=Mus musculus]	Exoc2	3.58872e+06	3.59462e+06	2.95046e+06	2.85557e+06	3.34182e+06	3.2918e+06	3.28359e+06	3.68465e+06	3.60167e+06	3.18717e+06	2.86018e+06	3.81736e+06
Q80U49	Centrosomal protein of 170 kDa protein B [OS=Mus musculus]	Cep170b	2.16607e+06	2.39545e+06	2.80803e+06	2.71143e+06	1.33685e+06	1.72619e+06	2.69611e+06	1.88586e+06	2.91602e+06	3.16487e+06	3.06126e+06	3.14676e+06
Q9D6J6	NADH dehydrogenase [ubiquinone] flavoprotein 2, mitochondrial [OS=Mus musculus]	Ndufv2	1.27737e+07	1.40828e+07	1.1414e+07	1.34589e+07	1.31082e+07	9.63284e+06	1.26789e+07	1.10068e+07	1.09431e+07	1.14143e+07	1.39795e+07	1.13899e+07
P30677	Guanine nucleotide-binding protein subunit alpha-14 [OS=Mus musculus]	Gna14	622915	681176	478210	647170	609430	568743	685955	760614	495591	712282	563062	616913
Q9CQX2	Cytochrome b5 type B [OS=Mus musculus]	Cyb5b	1.36913e+07	1.38057e+07	1.07481e+07	1.31603e+07	1.26955e+07	1.06847e+07	1.21725e+07	1.01735e+07	1.07934e+07	1.12419e+07	1.19031e+07	1.20771e+07
Q9CQI6	Coactosin-like protein [OS=Mus musculus]	Cotl1	1.34046e+07	1.59031e+07	1.45885e+07	1.41072e+07	1.40191e+07	1.55171e+07	14919088	1.54955e+07	1.54464e+07	1.51973e+07	1.64821e+07	1.64833e+07
Q8BPQ7	Small G protein signaling modulator 1 [OS=Mus musculus]	Sgsm1	1.42551e+06	1.3352e+06	1.27541e+06	1.30689e+06	1.11276e+06	1.27314e+06	1.46878e+06	1.67656e+06	1.89023e+06	1.79255e+06	1.8846e+06	1.52529e+06
Q91VM9	Inorganic pyrophosphatase 2, mitochondrial [OS=Mus musculus]	Ppa2	9.733e+06	8.94681e+06	9.80906e+06	1.0021e+07	9.88751e+06	9.08935e+06	1.14191e+07	1.03615e+07	1.05984e+07	9.28902e+06	1.02745e+07	1.05835e+07
P24270	Catalase [OS=Mus musculus]	Cat	3.90804e+06	4.48119e+06	4.01803e+06	4.30688e+06	5.62116e+06	5.64843e+06	5.39354e+06	5.17753e+06	3.05842e+06	4.26914e+06	4.03537e+06	3.19053e+06
Q9EQQ9	Protein O-GlcNAcase [OS=Mus musculus]	Oga	1.77437e+06	1.63712e+06	1.69442e+06	1.38191e+06	1.0216e+06	1.47258e+06	1.89548e+06	1.65591e+06	1.89816e+06	1.64669e+06	2.63352e+06	1.69581e+06
Q9WUM3	Coronin-1B [OS=Mus musculus]	Coro1b	7.50276e+06	7.54672e+06	7.41329e+06	7.9952e+06	8.2189e+06	8.12803e+06	8.69442e+06	6.8689e+06	8.33968e+06	7.61551e+06	7.99458e+06	7.09292e+06
Q61702	Inter-alpha-trypsin inhibitor heavy chain H1 [OS=Mus musculus]	Itih1	2.39415e+06	2.94066e+06	2.22662e+06	3.17441e+06	3.57459e+06	2.73392e+06	3.28161e+06	2.81381e+06	1.67545e+06	2.29803e+06	1.95779e+06	1.97626e+06
Q5U3K5	Rab-like protein 6 [OS=Mus musculus]	Rabl6	2.94537e+06	2.72971e+06	1.70679e+06	3.18098e+06	2.80418e+06	2.83546e+06	3.06115e+06	2.6375e+06	3.46365e+06	3.55583e+06	3.62154e+06	3.16006e+06
Q8K386	Ras-related protein Rab-15 [OS=Mus musculus]	Rab15	3.67863e+06	3.8834e+06	4.06948e+06	3.24304e+06	3.5287e+06	3.87701e+06	3.59185e+06	3.77478e+06	4.33211e+06	3.94575e+06	3.83355e+06	3.97812e+06
Q91W86	Vacuolar protein sorting-associated protein 11 homolog [OS=Mus musculus]	Vps11	3.40709e+06	4.41779e+06	3.60276e+06	3.52125e+06	3.36833e+06	3.98446e+06	3.5617e+06	3.45975e+06	3.42569e+06	3.53277e+06	3.35138e+06	3.44046e+06
Q62351	Transferrin receptor protein 1 [OS=Mus musculus]	Tfrc	3.33867e+06	3.01568e+06	3.55509e+06	3.1531e+06	2.53644e+06	2.27917e+06	3.16372e+06	3.2346e+06	2.2168e+06	1.99143e+06	2.42393e+06	1.89917e+06
Q9WTR1	Transient receptor potential cation channel subfamily V member 2 [OS=Mus musculus]	Trpv2	3.47825e+06	1.53399e+06	1.48213e+06	1.83231e+06	1.26202e+06	1.37969e+06	1.61764e+06	1.48347e+06	1.49994e+06	1.39611e+06	1.31521e+06	1.62408e+06
O88545	COP9 signalosome complex subunit 6 [OS=Mus musculus]	Cops6	1.87881e+07	1.54021e+07	1.41258e+07	1.32751e+07	1.52743e+07	1.62302e+07	1.52854e+07	1.54738e+07	1.74731e+07	2.30311e+07	1.46608e+07	18851831
Q9JMA1	Ubiquitin carboxyl-terminal hydrolase 14 [OS=Mus musculus]	Usp14	3.32199e+06	3.56653e+06	3.41694e+06	3.62095e+06	2.50754e+06	4.25878e+06	3.5812e+06	3.80875e+06	3.6578e+06	3.66829e+06	3.67586e+06	3.11374e+06
Q9CR61	NADH dehydrogenase [ubiquinone] 1 beta subcomplex subunit 7 [OS=Mus musculus]	Ndufb7	8.01908e+06	7.54008e+06	7.00863e+06	7.41204e+06	6.36876e+06	4.50347e+06	7.31866e+06	4.98167e+06	4.57112e+06	5.78568e+06	7.33615e+06	5.98229e+06
Q9ERG2	Striatin-3 [OS=Mus musculus]	Strn3	2.23022e+06	2.35219e+06	2.60632e+06	2.01152e+06	1.51403e+06	2.17062e+06	2.46448e+06	1.99714e+06	2.8422e+06	3.00456e+06	3.02923e+06	2.56102e+06
Q5PR73	GTP-binding protein Di-Ras2 [OS=Mus musculus]	Diras2	1.92127e+07	2.04727e+07	1.99078e+07	1.98403e+07	1.96769e+07	2.02541e+07	1.89211e+07	1.6635e+07	1.65804e+07	1.61832e+07	1.51998e+07	1.563e+07
Q60605	Myosin light polypeptide 6 [OS=Mus musculus]	Myl6	1.59964e+07	1.55491e+07	1.50102e+07	1.7038e+07	1.95169e+07	1.68184e+07	1.83667e+07	1.59045e+07	1.35161e+07	14832546	1.28205e+07	1.46486e+07
Q80U56	Late secretory pathway protein AVL9 homolog [OS=Mus musculus]	Avl9	2.70291e+06	2.6228e+06	2.17915e+06	2.72081e+06	3.15251e+06	1.95129e+06	2.51465e+06	2.66115e+06	2.82191e+06	2.59178e+06	2.92593e+06	2.42229e+06
Q61923	Potassium voltage-gated channel subfamily A member 6 [OS=Mus musculus]	Kcna6	1.23252e+06	1.07729e+06	1.30421e+06	1.36722e+06	1.00525e+06	956964	1.22145e+06	1.23486e+06	1.14361e+06	1.41442e+06	1.34618e+06	1.35764e+06
P16460	Argininosuccinate synthase [OS=Mus musculus]	Ass1	4905216	5.40431e+06	5.4824e+06	5.03118e+06	4.97496e+06	4.57626e+06	4.3726e+06	5.1092e+06	7.15147e+06	7.81713e+06	6.12182e+06	6.11118e+06
Q8K2C9	Very-long-chain (3R)-3-hydroxyacyl-CoA dehydratase 3 [OS=Mus musculus]	Hacd3	1.19652e+07	1.231e+07	1.18643e+07	1.32355e+07	1.07969e+07	1.11001e+07	1.2345e+07	1.25395e+07	1.16763e+07	1.19487e+07	1.33677e+07	1.15292e+07
Q62159	Rho-related GTP-binding protein RhoC [OS=Mus musculus]	Rhoc								27700.2	44537.7	57100.5		13676.9
Q99LD4	COP9 signalosome complex subunit 1 [OS=Mus musculus]	Gps1	1.46258e+07	2.04572e+07	1.5939e+07	1.51031e+07	1.59841e+07	1.60007e+07	1.71728e+07	1.63493e+07	1.69588e+07	1.757e+07	1.60214e+07	2.05565e+07
Q06335	Amyloid beta precursor like protein 2 [OS=Mus musculus]	Aplp2	2.31738e+06	2.14963e+06	2.51869e+06	2.2978e+06	2.54411e+06	2.42515e+06	2.62203e+06	2.61702e+06	1.96861e+06	2.36123e+06	2.15194e+06	1.65252e+06
Q925E7	Serine/threonine-protein phosphatase 2A 55 kDa regulatory subunit B delta isoform [OS=Mus musculus]	Ppp2r2d	266077	253451	234260	243638	278103	234439	242722	346025	362934	244185	284399	330424
Q9R0X4	Acyl-coenzyme A thioesterase 9, mitochondrial [OS=Mus musculus]	Acot9	6.51905e+06	6.10068e+06	6.40768e+06	6.99575e+06	5.25584e+06	4.63361e+06	6.02545e+06	5.08769e+06	2.65312e+06	2.62155e+06	6.21793e+06	3.66801e+06
Q9QZE5	Coatomer subunit gamma-1 [OS=Mus musculus]	Copg1	606246	598582	818807	766258	947052	768223	996881	1.31951e+06	1.35106e+06	759422	989910	982943
Q8BMI3	ADP-ribosylation factor-binding protein GGA3 [OS=Mus musculus]	Gga3	1.61697e+06	1.62575e+06	1.52138e+06	2.01568e+06	1.75989e+06	1.7423e+06	1.87972e+06	2.07373e+06	1.97958e+06	1.73142e+06	1.87715e+06	1.66717e+06
Q80W21	Glutathione S-transferase Mu 7 [OS=Mus musculus]	Gstm7	667892	846873	679057	653404	719688	559371	594000	190838	384683	559276	749699	568382
Q8BGD9	Eukaryotic translation initiation factor 4B [OS=Mus musculus]	Eif4b	3.35345e+06	2.9468e+06	3.1087e+06	6.08128e+06	3.16787e+06	3.18424e+06	3.50271e+06	2.52557e+06	3.75493e+06	3.11377e+06	3.32197e+06	2.81563e+06
Q8VD04	GRIP1-associated protein 1 [OS=Mus musculus]	Gripap1	3.12005e+06	3.63054e+06	4.17287e+06	4.51281e+06	3.11671e+06	4.19696e+06	3.77511e+06	3.05442e+06	4.33127e+06	3.97409e+06	4.07398e+06	3.36822e+06
O70439	Syntaxin-7 [OS=Mus musculus]	Stx7	7.76101e+06	7.53677e+06	7.66001e+06	7.77207e+06	8.41113e+06	8.05471e+06	8.40267e+06	7.77391e+06	9.80769e+06	1.10609e+07	9.10793e+06	9.0021e+06
Q14CH0	Protein FAM171B [OS=Mus musculus]	Fam171b	1.25381e+07	1.02133e+07	1.06575e+07	1.06728e+07	1.18008e+07	1.02985e+07	1e+07	8.74815e+06	5.92866e+06	8.00293e+06	6.41279e+06	1.2008e+07
Q91VR5	ATP-dependent RNA helicase DDX1 [OS=Mus musculus]	Ddx1	3.1263e+06	3.90926e+06	3.87045e+06	3.13189e+06	2.75769e+06	4.02274e+06	3.03163e+06	3.09727e+06	4.03929e+06	3.32235e+06	4.38326e+06	4.49443e+06
Q9CZ42	ATP-dependent (S)-NAD(P)H-hydrate dehydratase [OS=Mus musculus]	Naxd	3.50862e+06	4.59857e+06	4.11234e+06	3.88996e+06	4.38681e+06	3.36724e+06	3.93528e+06	4.48119e+06	4.726e+06	4.19511e+06	4.59535e+06	4.5663e+06
P55096	ATP-binding cassette sub-family D member 3 [OS=Mus musculus]	Abcd3	2.35249e+06	2.49787e+06	2.1444e+06	2.03637e+06	2.85139e+06	2.83274e+06	2.83999e+06	2.81054e+06	2.17681e+06	2.17993e+06	2.0896e+06	1.79471e+06
O08989	Ras-related protein M-Ras [OS=Mus musculus]	Mras	8.05765e+06	7.09146e+06	7.28912e+06	8.35233e+06	8.04901e+06	8.06332e+06	8.32144e+06	8.10304e+06	8.55821e+06	8.80316e+06	7.59498e+06	8.49825e+06
Q69ZS6	Synaptic vesicle glycoprotein 2C [OS=Mus musculus]	Sv2c	619521	537956	598603	648180	792926	505341	688547	711307	739993	534885	329435	556361
Q91XL9	Oxysterol-binding protein-related protein 1 [OS=Mus musculus]	Osbpl1a	2.42196e+06	2.27089e+06	1.88885e+06	2.53042e+06	2.00483e+06	2.06359e+06	2.20586e+06	2.11703e+06	2.56863e+06	2.27152e+06	1.94866e+06	3.50565e+06
Q03141	MAP/microtubule affinity-regulating kinase 3 [OS=Mus musculus]	Mark3	692889	982918	521241	847953	652264	919132	1.04091e+06	767666	983156	617465	288756	558443
Q63932	Dual specificity mitogen-activated protein kinase kinase 2 [OS=Mus musculus]	Map2k2	445234	413533	352065	371801	429004	359421	419240	403532	385937	403300	322090	511594
Q3UHD1	Adhesion G protein-coupled receptor B1 [OS=Mus musculus]	Adgrb1	3.55466e+06	2.81624e+06	3.07107e+06	3.81838e+06	2.21418e+06	3.0528e+06	2.7647e+06	2.78095e+06	2.85084e+06	2.87319e+06	3.2709e+06	3.46303e+06
Q9CYZ2	Tumor protein D54 [OS=Mus musculus]	Tpd52l2	6.38699e+06	6.15189e+06	5.86784e+06	6.88003e+06	6.86221e+06	6.24363e+06	6.71043e+06	5.52432e+06	5.51708e+06	5.38028e+06	7.03015e+06	6.88953e+06
P70195	Proteasome subunit beta type-7 [OS=Mus musculus]	Psmb7	4.68867e+06	4.67843e+06	4.35869e+06	4.04553e+06	3.53777e+06	5.30225e+06	4.88045e+06	5.39016e+06	4.58981e+06	5.30774e+06	4.56023e+06	3.57872e+06
Q80TL1	Adenylate cyclase type 2 [OS=Mus musculus]	Adcy2	1.26724e+06	1.18359e+06	1.15839e+06	1.25159e+06	1.25805e+06	1.0971e+06	1.15274e+06	1.63689e+06	1.28677e+06	1.24834e+06	1.20382e+06	1.47782e+06
Q9WV54	Acid ceramidase [OS=Mus musculus]	Asah1	2.38821e+06	2.60572e+06	2.284e+06	3.07294e+06	3.67493e+06	2.00281e+06	3.14924e+06	4.3565e+06	2.33891e+06	2.03865e+06	2.8506e+06	2.46177e+06
B1AXV0	DOMON domain-containing protein FRRS1L [OS=Mus musculus]	Frrs1l	7.18071e+06	7.05744e+06	6.15914e+06	5.14832e+06	5.39019e+06	6.33097e+06	6.3045e+06	5.66759e+06	6.24331e+06	7.17137e+06	6.74894e+06	6.96089e+06
P62774	Myotrophin [OS=Mus musculus]	Mtpn	1.27492e+07	8.81448e+06	9.55455e+06	9.2726e+06	1.13692e+07	8.02376e+06	1.21733e+07	8.84571e+06	9.16504e+06	8.84573e+06	8.66972e+06	1.0478e+07
P70699	Lysosomal alpha-glucosidase [OS=Mus musculus]	Gaa	5.81486e+06	5.97152e+06	4.9986e+06	5.32615e+06	5.9166e+06	6.00823e+06	6.61477e+06	5.48085e+06	7.00835e+06	5.91632e+06	6.75053e+06	4.73323e+06
B2RUJ5	Amyloid-beta A4 precursor protein-binding family A member 1 [OS=Mus musculus]	Apba1	1.65651e+06	1.93689e+06	1.68088e+06	1.83026e+06	1.8022e+06	1.94728e+06	1.50707e+06	1.80063e+06	1.73218e+06	1.57634e+06	1.62662e+06	2.07953e+06
Q8K221	Arfaptin-2 [OS=Mus musculus]	Arfip2	6.7951e+06	8.3086e+06	6.57711e+06	7.29147e+06	6.78051e+06	7.55622e+06	7.14788e+06	6.48235e+06	7.7377e+06	7.61518e+06	7.36629e+06	8.61443e+06
Q91V09	WD repeat-containing protein 13 [OS=Mus musculus]	Wdr13	4.65355e+06	5.18276e+06	5.23049e+06	5.73091e+06	5.73599e+06	6.9942e+06	6.52863e+06	6.15201e+06	7.81174e+06	7.2676e+06	8.1544e+06	6.04969e+06
Q5SWU9	Acetyl-CoA carboxylase 1 [OS=Mus musculus]	Acaca	428545	547202	552763	941876	655058	474182	212019	427736	795153	634139	753642	704840
P47753	F-actin-capping protein subunit alpha-1 [OS=Mus musculus]	Capza1	2.06005e+06	2.03039e+06	2.41241e+06	1.98487e+06	2.54508e+06	2.29546e+06	2.51761e+06	2.6235e+06	2.65978e+06	2.51072e+06	2.70973e+06	2.38795e+06
Q9Z2U1	Proteasome subunit alpha type-5 [OS=Mus musculus]	Psma5	9.04561e+06	9.31125e+06	8.64253e+06	7.88118e+06	1.00054e+07	8.708e+06	9016966	9.57804e+06	9.67761e+06	9.20465e+06	8.8209e+06	9.41178e+06
Q00623	Apolipoprotein A-I [OS=Mus musculus]	Apoa1	1.52317e+07	1.89849e+07	1.71752e+07	1.89776e+07	1.72391e+07	2.02867e+07	1.70659e+07	1.81468e+07	8.50925e+06	9.07203e+06	7.15689e+06	7.20745e+06
Q61165	Sodium/hydrogen exchanger 1 [OS=Mus musculus]	Slc9a1	4.34572e+06	4.49537e+06	4.40582e+06	4.97704e+06	4.15555e+06	4.53306e+06	4.12567e+06	4.63147e+06	4.53165e+06	4.31774e+06	4.59836e+06	4.57474e+06
Q922P8	Transmembrane protein 132A [OS=Mus musculus]	Tmem132a	2.96457e+06	2.94417e+06	2.68341e+06	2.84387e+06	3.00898e+06	2.97986e+06	3.31338e+06	3.41656e+06	2.50146e+06	2.59776e+06	2.48859e+06	2.80344e+06
Q9D172	Glutamine amidotransferase-like class 1 domain-containing protein 3, mitochondrial [OS=Mus musculus]	Gatd3	1.71228e+07	1.85932e+07	1.81783e+07	2.04224e+07	1.70448e+07	1.36146e+07	1.64096e+07	1.59122e+07	1.36091e+07	1.75974e+07	2.13177e+07	1.71267e+07
Q61423	Potassium voltage-gated channel subfamily A member 4 [OS=Mus musculus]	Kcna4	2.21525e+06	2.35142e+06	1.92107e+06	2.01309e+06	1.73524e+06	1.93469e+06	1.80593e+06	1.70559e+06	2.59652e+06	2.7153e+06	2.31799e+06	2.49101e+06
Q9D0M5	Dynein light chain 2, cytoplasmic [OS=Mus musculus]	Dynll2	3.53136e+07	3.57337e+07	3.09028e+07	3.47296e+07	3.56687e+07	3.24055e+07	3.25173e+07	2.95151e+07	3.4158e+07	3.86163e+07	3.40664e+07	3.3611e+07
Q8R164	Valacyclovir hydrolase [OS=Mus musculus]	Bphl	3.39253e+06	3.47791e+06	3.13312e+06	3.6718e+06	3.05058e+06	2.00944e+06	3.227e+06	3.67511e+06	2.78702e+06	2.88453e+06	3.60249e+06	3.09417e+06
Q8R361	Rab11 family-interacting protein 5 [OS=Mus musculus]	Rab11fip5	1.82085e+06	1.77681e+06	2.32673e+06	2.16921e+06	1.86844e+06	2.49553e+06	2.67605e+06	2.51524e+06	1.37593e+06	1.77682e+06	2.20543e+06	2.30407e+06
Q6VNB8	WD repeat and FYVE domain-containing protein 3 [OS=Mus musculus]	Wdfy3	1.10727e+06	658205	1.25157e+06	1.07475e+06	1.11607e+06	1.34424e+06	1.13543e+06	1.62896e+06	1.35897e+06	941264	1.28842e+06	1.20277e+06
Q925N0	Sideroflexin-5 [OS=Mus musculus]	Sfxn5	4.0517e+06	4.06092e+06	3.77217e+06	3.70745e+06	3.4439e+06	2.15608e+06	3.76302e+06	3.8153e+06	2.48364e+06	3.49969e+06	3.59439e+06	3.31323e+06
Q8BHC1	Ras-related protein Rab-39B [OS=Mus musculus]	Rab39b	3.83644e+06	3.82507e+06	3.72394e+06	4.39646e+06	3.56695e+06	3.96684e+06	4.14553e+06	3.95443e+06	4.56759e+06	4.30629e+06	4.51164e+06	4.49272e+06
Q8CIB5	Fermitin family homolog 2 [OS=Mus musculus]	Fermt2	3.56465e+06	3.47527e+06	3.19545e+06	3.98367e+06	3.47052e+06	2.82746e+06	4.28098e+06	3.02647e+06	2.8263e+06	3.54375e+06	3.39405e+06	2.60862e+06
P62908	40S ribosomal protein S3 [OS=Mus musculus]	Rps3	6.45537e+06	5.87274e+06	5.67403e+06	4.24005e+06	6.82379e+06	5.59043e+06	6.70447e+06	5.54777e+06	4.86356e+06	4.44093e+06	6.08502e+06	4.27909e+06
Q63912	Oligodendrocyte-myelin glycoprotein [OS=Mus musculus]	Omg	3.69685e+07	32541430	3.66732e+07	3.94621e+07	4.02827e+07	4.32997e+07	3.61058e+07	3.88082e+07	50476643	4.37444e+07	3.84764e+07	4.3514e+07
O55091	Protein IMPACT [OS=Mus musculus]	Impact	3.2145e+06	2.94515e+06	3.31724e+06	3.36707e+06	2.96181e+06	3.45852e+06	2.93445e+06	2.89424e+06	5.03803e+06	4.42064e+06	4.13488e+06	3.72175e+06
P10518	Delta-aminolevulinic acid dehydratase [OS=Mus musculus]	Alad	1.62818e+06	1.24671e+06	1.44121e+06	1.64234e+06	1.60685e+06	1.70624e+06	1.01882e+06	2.167e+06	2.01291e+06	1.75793e+06	1.90702e+06	2.07678e+06
Q9D898	Actin-related protein 2/3 complex subunit 5-like protein [OS=Mus musculus]	Arpc5l	7.0154e+06	9.1324e+06	7.95667e+06	8.56188e+06	8.29371e+06	9.81655e+06	8.27997e+06	8.91511e+06	8.45712e+06	8.20137e+06	9.11641e+06	1.00388e+07
P70290	55 kDa erythrocyte membrane protein [OS=Mus musculus]	Mpp1	1.86949e+07	2.40666e+07	2.08384e+07	2.12298e+07	2.04158e+07	2.53011e+07	2.57724e+07	2.15772e+07	2.08303e+07	2.13897e+07	2.48547e+07	1.85812e+07
P12849	cAMP-dependent protein kinase type I-beta regulatory subunit [OS=Mus musculus]	Prkar1b	2.80021e+07	2.40634e+07	3.18175e+07	3.38443e+07	2.66716e+07	1.99107e+07	2.45135e+07	3.37887e+07	3.03729e+07	2.36769e+07	2.6242e+07	3.75132e+07
P63046	Sulfotransferase 4A1 [OS=Mus musculus]	Sult4a1	4.09205e+06	4.10195e+06	3.84842e+06	4.47201e+06	3.72588e+06	3.54597e+06	4.25054e+06	3.5727e+06	4.20216e+06	4.6317e+06	4.2005e+06	4.14664e+06
Q922Q1	Mitochondrial amidoxime reducing component 2 [OS=Mus musculus]	Mtarc2	5.89303e+06	4.86462e+06	5.17885e+06	5.13518e+06	6.5926e+06	5.44289e+06	7.17094e+06	5.47554e+06	6.09534e+06	5.03637e+06	6.24775e+06	4.71437e+06
Q64331	Unconventional myosin-VI [OS=Mus musculus]		4.42844e+06	4.21065e+06	4.31341e+06	3.74726e+06	5.26455e+06	4.75487e+06	4771480	4.50471e+06	4.79599e+06	5.09469e+06	5.64237e+06	4.77729e+06
O35551	Rab GTPase-binding effector protein 1 [OS=Mus musculus]	Rabep1	1.23461e+06	1.24728e+06	1.28048e+06	936202	1.26721e+06	1.32054e+06	1.30834e+06	1.24793e+06	1.61254e+06	981648	1.1223e+06	964213
Q791T5	Mitochondrial carrier homolog 1 [OS=Mus musculus]	Mtch1	4.64038e+06	5.45474e+06	4.65362e+06	5.30935e+06	5.11261e+06	4.28737e+06	5.60472e+06	5.37794e+06	4.48338e+06	4.51857e+06	6.21268e+06	5.07156e+06
Q8BIF0	CD99 antigen-like protein 2 [OS=Mus musculus]	Cd99l2	2.59798e+06	2.06198e+06	2.6985e+06	2.59091e+06	2.64387e+06	2.26987e+06	2.24003e+06	1.73731e+06	3.68476e+06	3.79542e+06	2.30024e+06	3.96348e+06
Q9Z0V2	Potassium voltage-gated channel subfamily D member 2 [OS=Mus musculus]	Kcnd2	6.08731e+06	5.44998e+06	5.39705e+06	5.49128e+06	5.49044e+06	5.55035e+06	4.93018e+06	4.72703e+06	4.70631e+06	4.78105e+06	3.745e+06	4.11744e+06
P85094	Isochorismatase domain-containing protein 2A [OS=Mus musculus]	Isoc2a	468810	406599	377116	501179	337261	146823	481742	382873	249895	458737	591931	405226
Q9Z1W9	STE20/SPS1-related proline-alanine-rich protein kinase [OS=Mus musculus]	Stk39	4.45742e+06	2.84076e+06	3.81054e+06	3.39963e+06	4.963e+06	2.76875e+06	4.77419e+06	3.31889e+06	4.89087e+06	3.67158e+06	4.84688e+06	3.68633e+06
Q3TDN2	FAS-associated factor 2 [OS=Mus musculus]	Faf2	1.73018e+06	1.65493e+06	1.16188e+06	1.51678e+06	1.65266e+06	2.21202e+06	2.70578e+06	1.61539e+06	2.13432e+06	1.71405e+06	1.86408e+06	1.5709e+06
Q8BY89	Choline transporter-like protein 2 [OS=Mus musculus]	Slc44a2	3.41628e+06	2.85227e+06	909994	2.08672e+06	2.79967e+06	3.76365e+06	3.48281e+06	2.89143e+06	4.19986e+06	4.06906e+06	3.05024e+06	3.05897e+06
Q9Z2W0	Aspartyl aminopeptidase [OS=Mus musculus]	Dnpep	2.6357e+06	2.81545e+06	2.47421e+06	3.06048e+06	3.11788e+06	3.02676e+06	3.17995e+06	3.25237e+06	3.34767e+06	2.86196e+06	3.13195e+06	3.04757e+06
Q920E5	Farnesyl pyrophosphate synthase [OS=Mus musculus]	Fdps	4.42387e+06	4.01387e+06	4.13863e+06	3.95276e+06	5.72012e+06	4.65137e+06	6.25414e+06	4.19306e+06	4.42773e+06	4.73314e+06	5.05571e+06	4.31468e+06
Q99J08	SEC14-like protein 2 [OS=Mus musculus]	Sec14l2	2.57089e+06	3.25838e+06	1.99204e+06	2.41467e+06	2.2309e+06	2.29818e+06	2.44979e+06	2.93644e+06	1.94565e+06	3.67928e+06	2.10713e+06	2.4919e+06
Q60738	Zinc transporter 1 [OS=Mus musculus]	Slc30a1	3.72583e+06	5.04422e+06	4.72732e+06	3.73586e+06	4.48611e+06	4.48565e+06	3.92601e+06	4.32205e+06	6.01782e+06	6.39668e+06	4.52774e+06	4.93275e+06
Q9CXW3	Calcyclin-binding protein [OS=Mus musculus]	Cacybp	3.12634e+06	2.72628e+06	2.6115e+06	3.54926e+06	2.45792e+06	3.13046e+06	2.74285e+06	2.55026e+06	3.84897e+06	4.15257e+06	3.99305e+06	4.14833e+06
Q91WP6	Serine protease inhibitor A3N [OS=Mus musculus]	Serpina3n	380092	455232	256170	417265	565351	351052	597888	126756
Q69ZH9	Rho GTPase-activating protein 23 [OS=Mus musculus]	Arhgap23	3.95917e+06	4.07281e+06	3.83106e+06	4.40002e+06	4.26488e+06	4.4467e+06	4.47956e+06	4.76946e+06	3.63467e+06	3.00637e+06	3.38079e+06	2.77822e+06
Q61187	Tumor susceptibility gene 101 protein [OS=Mus musculus]	Tsg101	1.12437e+07	8.91272e+06	1.03437e+07	1.09041e+07	1.26205e+07	9.3068e+06	1.14353e+07	8.30783e+06	8.67402e+06	1.10537e+07	9.66056e+06	8.0088e+06
P23927	Alpha-crystallin B chain [OS=Mus musculus]	Cryab	1.12734e+07	9.72055e+06	1.10253e+07	1.08507e+07	1.48584e+07	1.08003e+07	1.37059e+07	1.13234e+07	9.16044e+06	9.68687e+06	9.07336e+06	1.00715e+07
Q9WVA4	Transgelin-2 [OS=Mus musculus]	Tagln2	902427	742047	917359	898680	2.69331e+06	2.61603e+06	3.41348e+06	2.80681e+06	729460	485872	551737	471074
Q61234	Alpha-1-syntrophin [OS=Mus musculus]	Snta1	2.06092e+06	2.1479e+06	2.15206e+06	2.38382e+06	2.25112e+06	1.85279e+06	2.29646e+06	2.0627e+06	2.35124e+06	2.35645e+06	2.28855e+06	2.30085e+06
Q9CZ04	COP9 signalosome complex subunit 7a [OS=Mus musculus]	Cops7a	5.26823e+06	5.49834e+06	5.14277e+06	5.34039e+06	5.49026e+06	6.58697e+06	5.70413e+06	5.41679e+06	5.59842e+06	4.69572e+06	5.09739e+06	3.91877e+06
Q8K2K6	Arf-GAP domain and FG repeat-containing protein 1 [OS=Mus musculus]	Agfg1	4.4433e+06	4.94727e+06	5.98388e+06	5.28389e+06	4.55675e+06	4.70049e+06	5.2668e+06	5.26383e+06	5.33797e+06	5.30878e+06	6.12781e+06	6.34269e+06
Q9JK48	Endophilin-B1 [OS=Mus musculus]	Sh3glb1	2.75816e+06	2.57209e+06	1.59886e+06	3.25478e+06	3.19115e+06	2.9126e+06	2.60894e+06	2.96289e+06	2.85414e+06	2.95453e+06	3.18912e+06	3.10318e+06
Q9CQM9	Glutaredoxin-3 [OS=Mus musculus]	Glrx3	5.09289e+06	5.59382e+06	5.29102e+06	5.57119e+06	6.01767e+06	2.85065e+07	5.63179e+06	5.33825e+06	5.18173e+06	4.83074e+06	6.82179e+06	5.46245e+06
P29533	Vascular cell adhesion protein 1 [OS=Mus musculus]	Vcam1	3.02685e+06	2.78003e+06	2.46962e+06	2.10922e+06	2.99644e+06	3.89591e+06	2.97261e+06	3.24984e+06	3.42717e+06	3.96683e+06	3.67453e+06	3.12031e+06
Q8C078	Calcium/calmodulin-dependent protein kinase kinase 2 [OS=Mus musculus]	Camkk2	3.43694e+06	2.97493e+06	2.97553e+06	3.44993e+06	2.94397e+06	2.26249e+06	3.16842e+06	2.94591e+06	2.92187e+06	3.01744e+06	2.55561e+06	3.23759e+06
Q9WTU3	Sodium channel protein type 8 subunit alpha [OS=Mus musculus]	Scn8a	91681.5	89674.3	66380.6	104810	61817.3	54308.7	40619	72606.5
Q8C163	Nuclease EXOG, mitochondrial [OS=Mus musculus]	Exog	3.31569e+06	3.66268e+06	2.94356e+06	3.4718e+06	3.73035e+06	3.26139e+06	3.82346e+06	3.28049e+06	2.79049e+06	2.87168e+06	2.99019e+06	3.60561e+06
Q4V9Z5	Seizure 6-like protein 2 [OS=Mus musculus]	Sez6l2	1.97715e+06	3.27304e+06	3.22358e+06	2.2082e+06	2.35862e+06	2.8639e+06	3.37428e+06	3.38825e+06	2.63214e+06	2.33026e+06	2.77963e+06	2.44507e+06
P21107	Tropomyosin alpha-3 chain [OS=Mus musculus]	Tpm3	1.29384e+07	1.10843e+07	1.10615e+07	1.39092e+07	1.45147e+07	1.46743e+07	7.61225e+06	7.4744e+06	1.37662e+07	1.28192e+07	1.49926e+07	1.06269e+07
Q8BH95	Enoyl-CoA hydratase, mitochondrial [OS=Mus musculus]	Echs1	1.10959e+07	5.33538e+06	5.32412e+06	4.73242e+06	4.42341e+06	2.97153e+06	4.90067e+06	3.64442e+06	3.56584e+06	4.82973e+06	5.26108e+06	5.30329e+06
Q8BIW1	Exopolyphosphatase PRUNE1 [OS=Mus musculus]	Prune1	2.40119e+06	2.35273e+06	1.87398e+06	2.60892e+06	2.94532e+06	2.7256e+06	2.5747e+06	3.61685e+06	3.21603e+06	3.01791e+06	2.60449e+06	1.48036e+06
Q8CIE6	Coatomer subunit alpha [OS=Mus musculus]	Copa	3.31098e+06	3.61636e+06	3.11559e+06	2.95781e+06	3.60522e+06	3.44618e+06	4.33066e+06	4.12346e+06	1.31193e+06	1.65286e+06	1.89374e+06	1.51932e+06
Q8BTY2	Sodium bicarbonate cotransporter 3 [OS=Mus musculus]	Slc4a7	416386	399717	491742	384063	370305	357409	331482	436072	434140	458369	336339	438435
Q8BJY1	26S proteasome non-ATPase regulatory subunit 5 [OS=Mus musculus]	Psmd5	3.29037e+06	3.60233e+06	2.35629e+06	2.73586e+06	2.75221e+06	2.72818e+06	3.01001e+06	2.58539e+06	2.98019e+06	3.05536e+06	3.36559e+06	3.23852e+06
Q61035	Histidine--tRNA ligase, cytoplasmic [OS=Mus musculus]	Hars1	2.90916e+06	3.31075e+06	2.41615e+06	3.99154e+06	3.59322e+06	3.46962e+06	2.9106e+06	3.87593e+06	2.97027e+06	4.05583e+06	3.24711e+06	3.45916e+06
O55126	Protein NipSnap homolog 2 [OS=Mus musculus]	Nipsnap2	4.93064e+06	5.88651e+06	6.4021e+06	5.53318e+06	4.31043e+06	3.03238e+06	5.21701e+06	4.35837e+06	3.40853e+06	4.25936e+06	4.79859e+06	5.38098e+06
Q8CG76	Aflatoxin B1 aldehyde reductase member 2 [OS=Mus musculus]	Akr7a2	3.55871e+06	2.72734e+06	3.64841e+06	3.6628e+06	3.29144e+06	3.05673e+06	3.22233e+06	3.4608e+06	4.04911e+06	3.78283e+06	3.85883e+06	3.39198e+06
Q8K4Q0	Regulatory-associated protein of mTOR [OS=Mus musculus]	Rptor	1.21731e+06	1.22446e+06	1.35176e+06	1.42037e+06	1.4561e+06	804936	1.52403e+06	1.49474e+06	1.43714e+06	1.1899e+06	1.21246e+06	1.34269e+06
Q9WVQ1	Membrane-associated guanylate kinase, WW and PDZ domain-containing protein 2 [OS=Mus musculus]	Magi2	3.01939e+06	2.45814e+06	2.48786e+06	2.8477e+06	2.26864e+06	2.33015e+06	2.58635e+06	2.44781e+06	2.52951e+06	2.19956e+06	2.88579e+06	3.40559e+06
P52760	2-iminobutanoate/2-iminopropanoate deaminase [OS=Mus musculus]	Rida	9.73154e+06	9.93099e+06	9.12612e+06	9.45382e+06	1.11351e+07	1.37563e+07	1.25596e+07	1.1261e+07	1.18424e+07	1.37143e+07	1.21399e+07	1.32778e+07
O54984	ATPase GET3 [OS=Mus musculus]	Get3	4.50375e+06	4.56124e+06	4.58282e+06	4.67174e+06	4.7916e+06	4.74474e+06	5.36773e+06	5.11053e+06	4.48437e+06	4.68741e+06	4.76133e+06	4.77743e+06
Q9JJV5	Voltage-dependent calcium channel gamma-3 subunit [OS=Mus musculus]	Cacng3	3.61973e+06	3.55022e+06	2.99452e+06	3.91636e+06	3.20653e+06	3.26215e+06	4.33707e+06	3.87802e+06	3.57947e+06	3.48947e+06	3.18072e+06	3.9948e+06
Q9CQZ5	NADH dehydrogenase [ubiquinone] 1 alpha subcomplex subunit 6 [OS=Mus musculus]	Ndufa6	1.13795e+07	1.27186e+07	1.31836e+07	1.38844e+07	1.31342e+07	7.77795e+06	1.18438e+07	1.33153e+07	1.03948e+07	1.12925e+07	1.22919e+07	1.23055e+07
Q9CR95	Adaptin ear-binding coat-associated protein 1 [OS=Mus musculus]	Necap1	1.87859e+07	1.87072e+07	2.05271e+07	2.02222e+07	1.77475e+07	2.01955e+07	1.98266e+07	1.84686e+07	2.25006e+07	2.41377e+07	2.32848e+07	2.32527e+07
O35295	Transcriptional activator protein Pur-beta [OS=Mus musculus]	Purb	4.42591e+06	4.60242e+06	4.31374e+06	5.24931e+06	4.02966e+06	4.32013e+06	4.3464e+06	4.93557e+06	3.64496e+06	3.96157e+06	4.14129e+06	4.0343e+06
P63168	Dynein light chain 1, cytoplasmic [OS=Mus musculus]	Dynll1	3.26348e+06	3.70518e+06	1.52449e+06	2.0602e+06	2.66223e+06	2.74833e+06	2.16363e+06	1.41823e+06	1.72765e+06	2.47072e+06	2.36853e+06	3.10878e+06
O55022	Membrane-associated progesterone receptor component 1 [OS=Mus musculus]	Pgrmc1	8.27819e+06	8.41555e+06	8.5045e+06	7.84205e+06	7.28403e+06	7.69999e+06	6.62985e+06	6.72418e+06	1.08996e+07	1.01399e+07	1.11324e+07	9.68898e+06
Q6PAJ1	Breakpoint cluster region protein [OS=Mus musculus]	Bcr	3.4789e+06	3.69685e+06	3.81558e+06	3.99569e+06	3.59038e+06	3.90424e+06	3.84002e+06	3.24516e+06	5.01374e+06	4.19967e+06	4.46267e+06	4.08704e+06
Q505F5	Leucine-rich repeat-containing protein 47 [OS=Mus musculus]	Lrrc47	2.40612e+06	2.68252e+06	2.67005e+06	2.89197e+06	2.64917e+06	2.82675e+06	2.41106e+06	2.8454e+06	3.13792e+06	3.02777e+06	2.99306e+06	3.16874e+06
O88951	Protein lin-7 homolog B [OS=Mus musculus]	Lin7b	691527	740253	689060	911503	597149	729014	745204		628368	665726	694166	617810
Q6PGN3	Serine/threonine-protein kinase DCLK2 [OS=Mus musculus]	Dclk2	1.95846e+06	2.34088e+06	5.51891e+06	2.15038e+06	1.78986e+06	1.87717e+06	1.82442e+06	1.757e+06	2.62648e+06	2.63699e+06	2.44895e+06	2.39673e+06
Q9DC53	Copine-8 [OS=Mus musculus]	Cpne8		29690.7					30056.1	49381	42377.4	49973.2		53137
Q8R317	Ubiquilin-1 [OS=Mus musculus]	Ubqln1	217350	479854	489425	604563	761849	616086	622606	701229	668832	674023	624496	626750
Q9CQ60	6-phosphogluconolactonase [OS=Mus musculus]	Pgls	1.27554e+06	971534	774837	1.29201e+06	1.25925e+06	1.24964e+06	1.00669e+06	1.41479e+06	1.50077e+06	978033	1.05615e+06	1.34587e+06
Q80WQ2	Protein VAC14 homolog [OS=Mus musculus]	Vac14	1.42821e+06	1.34312e+06	1.32637e+06	1.73712e+06	1.48151e+06	1.07803e+06	1.38272e+06	1.91515e+06	2.11413e+06	2.22362e+06	1.69166e+06	2.1425e+06
Q62393	Tumor protein D52 [OS=Mus musculus]	Tpd52	6.69306e+06	5.90037e+06	6.92342e+06	5.12258e+06	6.59292e+06	6.07912e+06	7.21951e+06	6.11716e+06	7.60946e+06	6.55997e+06	6.26415e+06	5.86123e+06
Q8VDP6	CDP-diacylglycerol--inositol 3-phosphatidyltransferase [OS=Mus musculus]	Cdipt	7.85008e+06	9.539e+06	8.4087e+06	9.2054e+06	9.13763e+06	1.04479e+07	1.00451e+07	1.10139e+07	1.00912e+07	8.07039e+06	9.62241e+06	7.4963e+06
Q9D0M1	Phosphoribosyl pyrophosphate synthase-associated protein 1 [OS=Mus musculus]	Prpsap1	850779	759378	402926	1.02694e+06	988234	970691	1.14025e+06	1.00657e+06	1.05739e+06	1.07723e+06	945862	952067
P26049	Gamma-aminobutyric acid receptor subunit alpha-3 [OS=Mus musculus]	Gabra3	671630	848235	920171	841409	769428	940930	959873	1.00881e+06	1.30104e+06	1.97821e+06	1.11374e+06	1.08837e+06
O08547	Vesicle-trafficking protein SEC22b [OS=Mus musculus]	Sec22b	7.96265e+06	8.36853e+06	8.93345e+06	8.99951e+06	8.05651e+06	6.81392e+06	9.29165e+06	7.3632e+06	7.26947e+06	6.16633e+06	8.70304e+06	6.37198e+06
B5TVM2	Immunoglobulin-like domain-containing receptor 2 [OS=Mus musculus]	Ildr2	1.34268e+06	1.73367e+06	1.98713e+06	1.80768e+06	1.75455e+06	1.2162e+06	1.60517e+06	1.20769e+06	3.11871e+06	2.19779e+06	2.27565e+06	2.45275e+06
P41216	Long-chain-fatty-acid--CoA ligase 1 [OS=Mus musculus]	Acsl1	4.40399e+06	4.06912e+06	4.49924e+06	4.54973e+06	4.64565e+06	4.08972e+06	4.57552e+06	4.82256e+06	3.77498e+06	3.82272e+06	4.38461e+06	3.53415e+06
P62071	Ras-related protein R-Ras2 [OS=Mus musculus]	Rras2	8.885e+06	8.16374e+06	7.79021e+06	7.44516e+06	8.04048e+06	7.43252e+06	7.55828e+06	7.67758e+06	8.70253e+06	9.551e+06	8.02183e+06	8.50002e+06
Q9QUR8	Semaphorin-7A [OS=Mus musculus]	Sema7a	3.53489e+06	4.03987e+06	3.51807e+06	4.06542e+06	4.36404e+06	5.05461e+06	5.40947e+06	4.07772e+06	3.33166e+06	3.07599e+06	2.96422e+06	3.75554e+06
Q80ZF8	Adhesion G protein-coupled receptor B3 [OS=Mus musculus]	Adgrb3	6.29341e+06	7.89427e+06	6.85757e+06	6.57513e+06	6.57867e+06	4.14341e+06	5.74265e+06	5.01708e+06	6.4511e+06	6.30125e+06	8.70132e+06	6.18784e+06
Q8BXR1	Probable cationic amino acid transporter [OS=Mus musculus]	Slc7a14	8.83959e+06	9.67712e+06	9.9478e+06	7.89662e+06	9.45738e+06	1.06787e+07	9.13358e+06	9.26551e+06	1.02658e+07	1.06776e+07	9.85094e+06	1.02751e+07
Q9DAW9	Calponin-3 [OS=Mus musculus]	Cnn3	6.02859e+06	6.27042e+06	5.70366e+06	5.67705e+06	7.55958e+06	7.68877e+06	8.32798e+06	6.92774e+06	6.53453e+06	8.17554e+06	7.80526e+06	7.04514e+06
O35114	Lysosome membrane protein 2 [OS=Mus musculus]	Scarb2	1.42383e+06	1.40472e+06	1.23947e+06	1.031e+06	1.64692e+06	1.24471e+06	2.04329e+06	1.75507e+06	721129	393083	1.21981e+06	1.26524e+06
Q9CQS4	Mitochondrial outer membrane protein SLC25A46 [OS=Mus musculus]	Slc25a46	1.09182e+06	1.36048e+06	867960	698076	933460	245336	884094	963057	1.04987e+06	1.04159e+06	1.19843e+06	877057
Q60692	Proteasome subunit beta type-6 [OS=Mus musculus]	Psmb6	6.77827e+06	6.70247e+06	6.77007e+06	6.09529e+06	6.8358e+06	7.57978e+06	7.45395e+06	6.42238e+06	7.72818e+06	8.01218e+06	7.76384e+06	6.94933e+06
P63143	Voltage-gated potassium channel subunit beta-1 [OS=Mus musculus]	Kcnab1	4.85576e+06	7.72821e+06	8.47328e+06	9.57576e+06	7.53917e+06	1.23686e+06	2.65048e+06	1.04904e+07	2.63013e+06	3.33437e+06	7.88948e+06	1.18281e+07
P34152	Focal adhesion kinase 1 [OS=Mus musculus]	Ptk2	2.31881e+06	1.7594e+06	2.37597e+06	1.70753e+06	2.47842e+06	1.92854e+06	1.93287e+06	2.15388e+06	2.13411e+06	1.99024e+06	2.49941e+06	1.81577e+06
Q62417	Sorbin and SH3 domain-containing protein 1 [OS=Mus musculus]	Sorbs1	2.89224e+06	4.18886e+06	3.09396e+06	3.31448e+06	2.35922e+06	2.76712e+06	2.96111e+06	3.0882e+06	3.39382e+06	4.67836e+06	3.56436e+06	4.93796e+06
Q8BLJ3	PI-PLC X domain-containing protein 3 [OS=Mus musculus]	Plcxd3	1.6294e+06	2.47674e+06	1.97124e+06	1.95315e+06	1.87924e+06	1.49735e+06	1.16406e+06	1.43136e+06	4.62557e+06	3.82038e+06	4.67125e+06	4.09996e+06
Q9DCS9	NADH dehydrogenase [ubiquinone] 1 beta subcomplex subunit 10 [OS=Mus musculus]	Ndufb10	6.54765e+06	6.01791e+06	5.01075e+06	5.55921e+06	5.7698e+06	4.0804e+06	6.6012e+06	4.24481e+06	5.88987e+06	6.00097e+06	6.47972e+06	5.62135e+06
O35658	Complement component 1 Q subcomponent-binding protein, mitochondrial [OS=Mus musculus]	C1qbp	6.76052e+06	7.41333e+06	7.12241e+06	6.6715e+06	6.85161e+06	4.42734e+06	6.00905e+06	5.36529e+06	5.64873e+06	5.87384e+06	8.48911e+06	6.79909e+06
P70208	Plexin-A3 [OS=Mus musculus]	Plxna3	675781	826110	841391	830411	832991	800634	1.17272e+06	739556	793112	929703	825234	560372
Q7TPS5	C2 domain-containing protein 5 [OS=Mus musculus]	C2cd5	1.62926e+06	1.45895e+06	2.27321e+06	1.40299e+06	1.51292e+06	1.69108e+06	1.67908e+06	1.45341e+06	1.60604e+06	1.62537e+06	1.46742e+06	1.17175e+06
Q99M71	Mammalian ependymin-related protein 1 [OS=Mus musculus]	Epdr1	5.4792e+06	5.32442e+06	6.32823e+06	4.84599e+06	6.12391e+06	4.95508e+06	6.20198e+06	6.67984e+06	4.69392e+06	3.51225e+06	4.07103e+06	4.01601e+06
Q9DCZ4	MICOS complex subunit Mic26 [OS=Mus musculus]	Apoo	7.55509e+07	8.42465e+07	7.87782e+07	8.51643e+07	7.75164e+07	8.68702e+07	7.09345e+07	8.49324e+07	8.52298e+07	8.11897e+07	8.07603e+07	8.04798e+07
Q91Y86	Mitogen-activated protein kinase 8 [OS=Mus musculus]	Mapk8	427931	214102	267757	326592	452676	453020	295874	447667	517926	440918	377441	541918
P55088	Aquaporin-4 [OS=Mus musculus]	Aqp4	8.81017e+06	7.98204e+06	1.03709e+07	1.04346e+07	8.00165e+06	1.20024e+07	8.13022e+06	8.37957e+06	1.26641e+07	1.3796e+07	1.17128e+07	1.36405e+07
Q0GNC1	Inverted formin-2 [OS=Mus musculus]	Inf2	631291	544726	486302	559029	716555	629866	768504	763867	415124	173105	142769	361520
Q8BG51	Mitochondrial Rho GTPase 1 [OS=Mus musculus]	Rhot1	1.29101e+07	1.54978e+07	1.31167e+07	1.2922e+07	1.01827e+07	9.61608e+06	8.51736e+06	1.74297e+07	1.27197e+07	1.53319e+07	1.19121e+07	1.64085e+07
O88441	Metaxin-2 [OS=Mus musculus]	Mtx2	2.275e+06	3.41296e+06	2.85747e+06	2.9798e+06	2.63911e+06	1.90211e+06	2.74944e+06	3.09603e+06	2.39723e+06	2.38904e+06	2.58706e+06	2.53773e+06
P97820	Mitogen-activated protein kinase kinase kinase kinase 4 [OS=Mus musculus]	Map4k4	148967	135573	109947	141429	182165	158737	204038	176058	168436	169546	138347	185930
P47199	Quinone oxidoreductase [OS=Mus musculus]	Cryz	1.96664e+06	2.13233e+06	2.69036e+06	2.71091e+06	1.64956e+06	2.11257e+06	2.62991e+06	2.7807e+06	2.83412e+06	3.80756e+06	2.6381e+06	2.16544e+06
Q9D8W7	OCIA domain-containing protein 2 [OS=Mus musculus]	Ociad2	1.96208e+06	2.7117e+06	2.22612e+06	2.64739e+06	2.62637e+06	1.31078e+06	2.62963e+06	2.71525e+06	2.43921e+06	2.40399e+06	2.24619e+06	2.11829e+06
Q9QUM9	Proteasome subunit alpha type-6 [OS=Mus musculus]	Psma6	9.33883e+06	9.64187e+06	7.34597e+06	8.63506e+06	8.5018e+06	9.05053e+06	8.36345e+06	8.71501e+06	8.20865e+06	8.98487e+06	1.01556e+07	1.04319e+07
Q6IRU5	Clathrin light chain B [OS=Mus musculus]	Cltb	3.64203e+07	3.62058e+07	3.49602e+07	3.76373e+07	3.87975e+07	4.27773e+07	3.74348e+07	2.79089e+07	3.46898e+07	37072172	3.0355e+07	3.14964e+07
Q9WUR9	Adenylate kinase 4, mitochondrial [OS=Mus musculus]	Ak4	1.46154e+06	2.11605e+06	1.69067e+06	1.66083e+06	1.50525e+06	1.06537e+06	1.3838e+06	1.88888e+06	1.55213e+06	1.60296e+06	2.50928e+06	2.80371e+06
Q924M7	Mannose-6-phosphate isomerase [OS=Mus musculus]	Mpi	2.54397e+06	2.43335e+06	2.60928e+06	2.71293e+06	2.47922e+06	3.06546e+06	2.65946e+06	2.68943e+06	2.79105e+06	3.02356e+06	3.11787e+06	2.99981e+06
Q99KK7	Dipeptidyl peptidase 3 [OS=Mus musculus]	Dpp3	1.41757e+06	1.56451e+06	941441	1.71166e+06	1.37046e+06	1.29966e+06	992745	1.36985e+06	1.62004e+06	1.44081e+06	1.41803e+06	1.37536e+06
Q9D710	Thioredoxin-related transmembrane protein 2 [OS=Mus musculus]	Tmx2	4.08332e+06	4.47607e+06	5.12339e+06	4.11383e+06	3.43096e+06	4.31973e+06	4.71913e+06	4.00952e+06	4.62416e+06	4.15784e+06	4.1953e+06	4.17933e+06
P62984	Ubiquitin-60S ribosomal protein L40 [OS=Mus musculus]	Uba52	1.3102e+08	1.35265e+08	1.38299e+08	1.5413e+08	1.49952e+08	1.4108e+08	1.46005e+08	134403136	105498900	1.40131e+08	1.06374e+08	1.21415e+08
Q91WG5	5'-AMP-activated protein kinase subunit gamma-2 [OS=Mus musculus]	Prkag2	2.57994e+06	3.25679e+06	1.97029e+06	2.70712e+06	2.87548e+06	2.73022e+06	2.65321e+06	2.85778e+06	1.31632e+06	2.31358e+06	2.28305e+06	2.401e+06
B0F2B4	Neuroligin 4-like [OS=Mus musculus]	Nlgn4l	2.22833e+06	1.78568e+06	2.12107e+06	1.83878e+06	1.86344e+06	2.06865e+06	2.34508e+06	1.68381e+06	1.69469e+06	2.07921e+06	1.85514e+06	1.51567e+06
P24288	Branched-chain-amino-acid aminotransferase, cytosolic [OS=Mus musculus]	Bcat1	3.63326e+06	3.47462e+06	4.03131e+06	3.56712e+06	3.40495e+06	3.02807e+06	3.4064e+06	3.01978e+06	3.00399e+06	2.41255e+06	2.7077e+06	3.1857e+06
Q8VEH5	EPM2A-interacting protein 1 [OS=Mus musculus]	Epm2aip1	1.94698e+06	1.83323e+06	2.28968e+06	1.83674e+06	2.55937e+06	2.10371e+06	1.9556e+06	2.8405e+06	1.9148e+06	2.44763e+06	1.94068e+06	2.15562e+06
Q9CQC9	GTP-binding protein SAR1b [OS=Mus musculus]	Sar1b	9.15758e+06	8.76062e+06	9.39136e+06	9.55304e+06	1.08742e+07	9.68884e+06	9.28907e+06	1.1528e+07	8.12415e+06	8.28094e+06	1.04613e+07	9.30031e+06
P51655	Glypican-4 [OS=Mus musculus]	Gpc4	1.44227e+06	1.18788e+06	1.62623e+06	898960	1.21037e+06	1.45323e+06	1.0031e+06	826840	3.16601e+06	1.25088e+07	1.14275e+07	2.70142e+06
P11835	Integrin beta-2 [OS=Mus musculus]	Itgb2	1.3199e+06	1.8472e+06	578198	1.14006e+06	2.39249e+06	2.3364e+06	3.85809e+06	3.77614e+06	294865	327435	1.56197e+06	574048
Q62425	Cytochrome c oxidase subunit NDUFA4 [OS=Mus musculus]	Ndufa4	4.3482e+07	5.16266e+07	5.05866e+07	4.91581e+07	4.51176e+07	3.29422e+07	4.92657e+07	4.41424e+07	3.64533e+07	4.0988e+07	5.03167e+07	4.62208e+07
P47911	60S ribosomal protein L6 [OS=Mus musculus]	Rpl6	2.71629e+06	2.49893e+06	2.52625e+06	2.11108e+06	4.09362e+06	2.72767e+06	3.83611e+06	4.42644e+06	2.83354e+06	1.78181e+06	3.22405e+06	2.21315e+06
Q8K3J1	NADH dehydrogenase [ubiquinone] iron-sulfur protein 8, mitochondrial [OS=Mus musculus]	Ndufs8	8.74238e+06	8.93004e+06	8.01092e+06	8.94913e+06	1.01328e+07	7.59102e+06	1.08738e+07	9.52062e+06	7.71914e+06	8.20534e+06	1.10752e+07	8.08252e+06
Q8BH58	TIP41-like protein [OS=Mus musculus]	Tiprl	8.59358e+06	7.34586e+06	7.49388e+06	7.17759e+06	6.59131e+06	8.39115e+06	7.12286e+06	6.92262e+06	8.74697e+06	9.75234e+06	7.81741e+06	8.14137e+06
P60764	Ras-related C3 botulinum toxin substrate 3 [OS=Mus musculus]	Rac3	551158	649370	564265	694205	376581	385516	322117	859721	693661	694522	936042	1.34242e+06
P59017	Bcl-2-like protein 13 [OS=Mus musculus]	Bcl2l13	1.1422e+06	1.38404e+06	1.03543e+06	1.29683e+06	970682	674661	774942	916702	998751	1.31127e+06	1.54611e+06	1.0705e+06
Q6ZQK5	Arf-GAP with coiled-coil, ANK repeat and PH domain-containing protein 2 [OS=Mus musculus]	Acap2	4.23315e+06	4.17757e+06	4.05244e+06	3.96554e+06	4.24604e+06	5.12185e+06	4887546	3.99634e+06	4.06419e+06	4.24016e+06	4.87611e+06	3.5776e+06
P58771	Tropomyosin alpha-1 chain [OS=Mus musculus]	Tpm1	3.90413e+07	4.09504e+07	3.89706e+07	4.22447e+07	4.71311e+07	4.76385e+07	2.99448e+07	3.72645e+07	4.19744e+07	4.27551e+07	5.12559e+07	3.96137e+07
Q61735	Leukocyte surface antigen CD47 [OS=Mus musculus]	Cd47	2.73295e+07	3.10239e+07	2.90072e+07	3.12749e+07	3.42197e+07	3.80751e+07	2.97599e+07	3.79061e+07	3.62625e+07	2.89646e+07	2.65545e+07	3.02393e+07
Q9JL62	Glycolipid transfer protein [OS=Mus musculus]	Gltp	8.13089e+06	7.67942e+06	8.33916e+06	9.93943e+06	1.06098e+07	8.74977e+06	6.77103e+06	6.35411e+06	7.55418e+06	7.4014e+06	7.51641e+06	6.84513e+06
Q8CDN6	Thioredoxin-like protein 1 [OS=Mus musculus]	Txnl1	1.83527e+07	1.41198e+07	1.57876e+07	1.40044e+07	1.33727e+07	1.12294e+07	1.60318e+07	1.20351e+07	1.13837e+07	1.531e+07	1.37919e+07	1.26501e+07
P62869	Elongin-B [OS=Mus musculus]	Elob	5.83671e+06	6.76355e+06	6.40701e+06	6.09491e+06	6.90491e+06	7.07775e+06	7.5889e+06	6.20306e+06	6.96376e+06	6.9956e+06	6.94477e+06	6.15029e+06
Q9CZY3	Ubiquitin-conjugating enzyme E2 variant 1 [OS=Mus musculus]	Ube2v1	2.53047e+07	2.54744e+07	2.53516e+07	2.80535e+07	2.96743e+07	3.43132e+07	2.68582e+07	2.69967e+07	2.71363e+07	2.89291e+07	2.79037e+07	2.28405e+07
P61022	Calcineurin B homologous protein 1 [OS=Mus musculus]	Chp1	5.55211e+06	5.19613e+06	5.17487e+06	5.06099e+06	5.88093e+06	5.95764e+06	5.64327e+06	5.45402e+06	5.95393e+06	6.07182e+06	4.88115e+06	5.42677e+06
Q91VN4	MICOS complex subunit Mic25 [OS=Mus musculus]	Chchd6	1.49827e+07	2.06493e+07	1.71103e+07	1.51083e+07	1.43325e+07	1.7551e+07	1.80863e+07	1.84103e+07	2.65124e+07	1.91236e+07	2.40787e+07	2.84913e+07
P35288	Ras-related protein Rab-23 [OS=Mus musculus]	Rab23	3.78119e+06	3.58853e+06	4.07209e+06	4.00216e+06	4.24893e+06	5.12385e+06	3.52404e+06	4.05271e+06	4.11056e+06	5.50653e+06	4.56653e+06	4.35745e+06
Q6P5U7	NACHT and WD repeat domain-containing protein 2 [OS=Mus musculus]	Nwd2	1.67979e+06	2.22681e+06	2.08126e+06	2.71403e+06	1.94034e+06	2.12223e+06	2.14627e+06	2.02393e+06	2.83682e+06	2.65276e+06	2.73743e+06	2.54302e+06
O54901	OX-2 membrane glycoprotein [OS=Mus musculus]	Cd200	1.64326e+07	1.56875e+07	1.70632e+07	1.23472e+07	1.53065e+07	1.65584e+07	1.35847e+07	1.6265e+07	2.63972e+07	2.58721e+07	2.051e+07	2.29959e+07
Q9CYH2	Peroxiredoxin-like 2A [OS=Mus musculus]	Prxl2a	4.74923e+07	4.64811e+07	4.50225e+07	4.05404e+07	3.5101e+07	4.3915e+07	4.03438e+07	3.60307e+07	4.96344e+07	5.24763e+07	4.51419e+07	4.40675e+07
Q7TN29	Stromal membrane-associated protein 2 [OS=Mus musculus]	Smap2	2.78719e+06	2.29454e+06	2.6257e+06	2.90662e+06	3.00252e+06	2.85263e+06	2.8684e+06	2.896e+06	3.27792e+06	3.92332e+06	3.0657e+06	3.7427e+06
Q8BNU0	Armadillo repeat-containing protein 6 [OS=Mus musculus]	Armc6	1.88474e+06	1.4777e+06	1.45725e+06	1.8204e+06	1.76492e+06	1.44956e+06	1.2591e+06	1.69454e+06	1.97032e+06	1.80133e+06	1.86559e+06	1.89057e+06
Q8K274	Ketosamine-3-kinase [OS=Mus musculus]	Fn3krp	3.22977e+06	2.82894e+06	3.28394e+06	3.7399e+06	3.86504e+06	3.0419e+06	3.06369e+06	8.65902e+06	1.33177e+07	1.12393e+07	3.79709e+06	2.88126e+06
Q00612	Glucose-6-phosphate 1-dehydrogenase X [OS=Mus musculus]	G6pdx	2.42589e+06	2.57867e+06	2.37656e+06	2.39062e+06	2.84065e+06	2.69922e+06	3.47225e+06	3.09858e+06	2.32102e+06	2.62602e+06	2.91665e+06	2.4916e+06
Q3UMR5	Calcium uniporter protein, mitochondrial [OS=Mus musculus]	Mcu	4.82148e+06	6.24919e+06	5.44786e+06	5.32968e+06	4.72158e+06	4.09154e+06	5.20808e+06	5.7647e+06	5.13163e+06	4.5895e+06	6.06732e+06	5.45774e+06
Q99L13	3-hydroxyisobutyrate dehydrogenase, mitochondrial [OS=Mus musculus]	Hibadh	2.71292e+06	2.61544e+06	2.51425e+06	2.84832e+06	2.1586e+06	1.49809e+06	2.11775e+06	2.30677e+06	1.48607e+06	1.74863e+06	2.54545e+06	1.93301e+06
P97492	Regulator of G-protein signaling 14 [OS=Mus musculus]	Rgs14	1.14845e+06	875588	1.1435e+06	850576	783613	1.06876e+06	810214	988577	1.66831e+06	1.72644e+06	1.50909e+06	2.14795e+06
O35737	Heterogeneous nuclear ribonucleoprotein H [OS=Mus musculus]	Hnrnph1	1.97353e+06	2.38437e+06	1.92391e+06	1.73429e+06	2.18641e+06	1.91971e+06	2.39753e+06	2.56052e+06	1.3007e+06	1.77747e+06	1.8102e+06	2.16281e+06
Q9Z2U0	Proteasome subunit alpha type-7 [OS=Mus musculus]	Psma7	2.31935e+07	2.49697e+07	24450317	2.37764e+07	2.2938e+07	2.6622e+07	2.45986e+07	2.51295e+07	2.69956e+07	2.74339e+07	2.39181e+07	2.27106e+07
Q8C3Q5	Protein shisa-7 [OS=Mus musculus]	Shisa7	3.25855e+06	3.082e+06	3.34911e+06	2.73656e+06	2.05151e+06	2.88653e+06	2.73203e+06	2.81298e+06	3.23378e+06	3.70781e+06	4.35881e+06	3.72572e+06
O70310	Glycylpeptide N-tetradecanoyltransferase 1 [OS=Mus musculus]	Nmt1	1.49925e+06	1.57091e+06	1.38023e+06	1.75387e+06	1.67187e+06	1.61587e+06	1.56494e+06	1.86459e+06	1.54949e+06	1.7711e+06	1.5219e+06	1.41496e+06
Q3TES0	IQ motif and SEC7 domain-containing protein 3 [OS=Mus musculus]	Iqsec3	3.39142e+06	3.2042e+06	3.06422e+06	3.18567e+06	2.7945e+06	2.97366e+06	2.88219e+06	3.53833e+06	2.98032e+06	2.88839e+06	3.63888e+06	3.61335e+06
P14148	60S ribosomal protein L7 [OS=Mus musculus]	Rpl7	6.10103e+06	6.42392e+06	5.57088e+06	6.54422e+06	7.96994e+06	7.02477e+06	8.62878e+06	7.82565e+06	5.44663e+06	6.73063e+06	6.03833e+06	5.84426e+06
Q9CPP6	NADH dehydrogenase [ubiquinone] 1 alpha subcomplex subunit 5 [OS=Mus musculus]	Ndufa5	5.93222e+06	7.04368e+06	6.88236e+06	7.17989e+06	6.97094e+06	3.75445e+06	6.55028e+06	5.3761e+06	5.19898e+06	6.7204e+06	7.23665e+06	6.54978e+06
Q8C0L0	Thioredoxin-related transmembrane protein 4 [OS=Mus musculus]	Tmx4	5.40887e+06	5.71077e+06	5.16928e+06	5.0946e+06	5.96069e+06	5.71899e+06	6.48747e+06	5.46644e+06	5.119e+06	4.95568e+06	5.37663e+06	4.78224e+06
Q9WVE8	Protein kinase C and casein kinase substrate in neurons protein 2 [OS=Mus musculus]	Pacsin2	1.01971e+07	7.47515e+06	9.16954e+06	6.92762e+06	8.81758e+06	8.19556e+06	9.57287e+06	7.16395e+06	8.44323e+06	7.66765e+06	9.14671e+06	7.7535e+06
Q8BJH1	Zinc finger C2HC domain-containing protein 1A [OS=Mus musculus]	Zc2hc1a	4.42301e+06	4.83097e+06	4.59271e+06	4.80124e+06	4.07828e+06	4.31415e+06	4.49525e+06	4.34405e+06	5.97308e+06	5.2831e+06	5.1764e+06	5.58913e+06
B9EJ86	Oxysterol-binding protein-related protein 8 [OS=Mus musculus]	Osbpl8	2.94395e+06	2.39026e+06	2.87142e+06	2.51799e+06	2.12408e+06	2.1146e+06	2.64141e+06	2.46957e+06	2.95466e+06	2.8753e+06	2.96201e+06	3.25794e+06
O35405	5'-3' exonuclease PLD3 [OS=Mus musculus]	Pld3	9.56192e+06	5.78342e+06	4.65342e+06	1.40934e+07	1.05873e+07	4.52463e+06	1.01875e+07	1.15271e+07	8.30688e+06	9.10236e+06	4.47989e+06	4.73913e+06
Q9Z351	Potassium voltage-gated channel subfamily KQT member 2 [OS=Mus musculus]	Kcnq2	2.62278e+06	2.63652e+06	2.00801e+06	2.41267e+06	2.27761e+06	2.54481e+06	1.94136e+06	2.29344e+06	2.70159e+06	2.80309e+06	2.69302e+06	2.81804e+06
Q8CIN4	Serine/threonine-protein kinase PAK 2 [OS=Mus musculus]	Pak2	1.00796e+06	1.33674e+06	1.46069e+06	1.47057e+06	1.73894e+06	1.46681e+06	1.31748e+06	1.03572e+06	1.65658e+06	1.53736e+06	1.78343e+06	1.08521e+06
Q8BTM8	Filamin-A [OS=Mus musculus]	Flna	327725	782873	285790	1.3108e+06	4.44058e+06	1.25404e+06	2.50511e+06	1.37082e+06	206464	675481	276681	1.21412e+06
Q9QUR7	Peptidyl-prolyl cis-trans isomerase NIMA-interacting 1 [OS=Mus musculus]	Pin1	4.10293e+06	3.94863e+06	4.01681e+06	4.18507e+06	2.80494e+06	3.73322e+06	3.50933e+06	5.45826e+06	5.37149e+06	4.83848e+06	4.59491e+06	5.04733e+06
O89084	cAMP-specific 3',5'-cyclic phosphodiesterase 4A [OS=Mus musculus]	Pde4a	297029		217491	231667	251965	221298			163531	223538		314791
Q6P9S0	Protein MTSS 2 [OS=Mus musculus]	Mtss2	203530	210712	320210	315916	398585	399598	558916	372109	509487	291206	547307	484564
O54988	STE20-like serine/threonine-protein kinase [OS=Mus musculus]	Slk	5.76267e+06	5.92277e+06	5.21675e+06	4.35146e+06	4.95166e+06	6.83789e+06	5.81418e+06	5.25012e+06	5.15985e+06	4.86384e+06	6.0885e+06	4.65115e+06
Q8BG05	Heterogeneous nuclear ribonucleoprotein A3 [OS=Mus musculus]	Hnrnpa3	2.22164e+06	3.46214e+06	1.95848e+06	2.9201e+06	2.43515e+06	1.23507e+06	3.91886e+06	3.88242e+06	670864	585767	1.3524e+06	1.235e+06
P11404	Fatty acid-binding protein, heart [OS=Mus musculus]	Fabp3	1.10415e+07	1.0917e+07	1.15304e+07	1.25682e+07	1.30061e+07	1.34023e+07	1.20012e+07	1.32132e+07	1.15091e+07	1.03486e+07	1.09414e+07	1.03125e+07
P20152	Vimentin [OS=Mus musculus]	Vim	2.72323e+06	1.7472e+06	2.32438e+06	1.74299e+06	3.57552e+06	2.37663e+06	4916574	4.293e+06	1.8338e+06	2.13702e+06	1.55367e+06	2.15425e+06
Q9EQ20	Methylmalonate-semialdehyde dehydrogenase [acylating], mitochondrial [OS=Mus musculus]	Aldh6a1	1.77028e+06	1.80898e+06	1.89906e+06	2.1683e+06	1.5131e+06	1.28779e+06	2.27137e+06	1.82622e+06	1.73724e+06	1.90125e+06	3.03088e+06	2.27888e+06
P05555	Integrin alpha-M [OS=Mus musculus]	Itgam	1.12459e+06	2.1644e+06	986549	1.58833e+06	2.8346e+06	2.78237e+06	3.31297e+06	3.40728e+06	1.10565e+06	762569	1.51882e+06	889536
Q91YS8	Calcium/calmodulin-dependent protein kinase type 1 [OS=Mus musculus]	Camk1	1.07844e+06	805924	778824	1.04219e+06	1.16811e+06	1.19709e+06	1.05983e+06	1.07991e+06	1.12808e+06	944240	1.26069e+06	884387
P61089	Ubiquitin-conjugating enzyme E2 N [OS=Mus musculus]	Ube2n	2.13171e+07	2.44603e+07	2.27263e+07	2.51902e+07	2.52019e+07	2.65439e+07	2.38513e+07	2.55247e+07	2.38286e+07	2.57436e+07	2.37518e+07	2.36866e+07
P61211	ADP-ribosylation factor-like protein 1 [OS=Mus musculus]	Arl1	1.1543e+06	1.42502e+06	1.46951e+06	1.29761e+06	1.44969e+06	1.2966e+06	1.62777e+06	1.78619e+06	1.67428e+06	1.15791e+06	5.01885e+06	1.27554e+06
P0C0A3	Charged multivesicular body protein 6 [OS=Mus musculus]	Chmp6	2.43503e+06	2.70859e+06	2.09017e+06	2.38953e+06	2.92344e+06	2.24982e+06	2.30053e+06	2.1883e+06	2.56813e+06	2.6556e+06	2.09806e+06	2.27954e+06
Q9D154	Leukocyte elastase inhibitor A [OS=Mus musculus]	Serpinb1a	2.75384e+06	2.23357e+06	2.52118e+06	2.73887e+06	2.86068e+06	2.47531e+06	3.10971e+06	2.13763e+06	2.14576e+06	2.27215e+06	2.37518e+06	2.06659e+06
P63028	Translationally-controlled tumor protein [OS=Mus musculus]	Tpt1	1.0546e+07	9.71148e+06	9.01904e+06	8.39246e+06	9.2945e+06	1.30943e+07	8.6736e+06	9.44501e+06	7.50307e+06	8.07962e+06	7.81709e+06	8.72325e+06
Q8C7X2	ER membrane protein complex subunit 1 [OS=Mus musculus]	Emc1	2.37596e+06	2.64316e+06	2.75715e+06	2.83339e+06	2.77569e+06	2.59798e+06	2.7447e+06	2.57289e+06	2.87812e+06	2.62867e+06	3.0284e+06	2.71994e+06
A2AWA9	Rab GTPase-activating protein 1 [OS=Mus musculus]	Rabgap1	2.64873e+06	3.20004e+06	2.7603e+06	4.10083e+06	3.09879e+06	2.83654e+06	3.79822e+06	3.95628e+06	3.51917e+06	3.6398e+06	4.53881e+06	6.29391e+06
Q68EF6	Brain-enriched guanylate kinase-associated protein [OS=Mus musculus]	Begain	1.21721e+07	1.45968e+07	1.28073e+07	1.13839e+07	1.19981e+07	8.44294e+06	1.3037e+07	1.01367e+07	1.02413e+07	1.172e+07	1.34431e+07	1.23762e+07
P28867	Protein kinase C delta type [OS=Mus musculus]	Prkcd	5.24045e+06	6.1546e+06	5.51686e+06	6.62389e+06	5.70488e+06	7.52454e+06	5.96863e+06	5.83674e+06	4.76254e+06	5.51125e+06	4.62271e+06	3.97578e+06
Q61147	Ceruloplasmin [OS=Mus musculus]	Cp	1.10982e+06	1.07679e+06	725878	976306	1.67827e+06	1.46283e+06	1.27862e+06	1.12802e+06	475036	288887	217707	284527
Q9WTP7	GTP:AMP phosphotransferase AK3, mitochondrial [OS=Mus musculus]	Ak3	1.64303e+06	1.52189e+06	2.81758e+06	1.84053e+06	1.44298e+06	1.1137e+06	1.8476e+06	1.76554e+06	1.14823e+06	1.70868e+06	2.07791e+06	1.35132e+06
P12815	Programmed cell death protein 6 [OS=Mus musculus]	Pdcd6	5.00171e+06	5.42853e+06	5.06384e+06	5.29771e+06	4.69682e+06	4.81796e+06	5.17736e+06	5.69371e+06	4.80139e+06	3.80191e+06	5.3529e+06	5.42581e+06
Q8R191	Synaptogyrin-3 [OS=Mus musculus]	Syngr3	3.7665e+07	3.79417e+07	4.02033e+07	3.51087e+07	3.66862e+07	3.73831e+07	3.71292e+07	4.06469e+07	4.74469e+07	4.25017e+07	5.24604e+07	4.3083e+07
Q9Z2D1	Myotubularin-related protein 2 [OS=Mus musculus]	Mtmr2	5.82898e+06	5.37336e+06	1.50494e+06	1.56169e+06	6.5039e+06	3.83872e+06	1.03894e+06	5.53965e+06	5.47278e+06	2.32123e+06	2.01815e+06	2.01079e+06
Q8VBV7	COP9 signalosome complex subunit 8 [OS=Mus musculus]	Cops8	3.41799e+06	3.96851e+06	3.77059e+06	4.24932e+06	3.62026e+06	3.68192e+06	4.08741e+06	4.60626e+06	4.1798e+06	4.56446e+06	3.76463e+06	4.34757e+06
Q3V3V9	Capping protein, Arp2/3 and myosin-I linker protein 2 [OS=Mus musculus]	Carmil2	2.15627e+06	2.95305e+06	2.6105e+06	2.74531e+06	2.02167e+06	2.78395e+06	3.02761e+06	2.55978e+06	3.39774e+06	1.98457e+06	2.8194e+06	2.37165e+06
O35593	26S proteasome non-ATPase regulatory subunit 14 [OS=Mus musculus]	Psmd14	749966	939998	820468	301795	917045	852843	861510	656164	875774	1.14025e+06	852699	1.2075e+06
P14206	40S ribosomal protein SA [OS=Mus musculus]	Rpsa	2.6452e+06	2.80776e+06	2.0156e+06	1.97239e+06	2.70534e+06	1.82611e+06	3.55862e+06	2.48755e+06	1.58136e+06	1.7828e+06	1.78734e+06	1.77145e+06
Q8C167	Prolyl endopeptidase-like [OS=Mus musculus]	Prepl	1.64778e+06	1.38728e+06	1.72934e+06	1.12439e+06	1.87835e+06	1.81903e+06	1.97473e+06	1.71252e+06	1.70302e+06	2.10623e+06	1.36802e+06	1.59286e+06
Q60829	Protein phosphatase 1 regulatory subunit 1B [OS=Mus musculus]	Ppp1r1b	1.45964e+06	880651	1.56044e+06	1.95415e+06	2.31288e+06	1.56727e+06	2.74555e+06	1.64815e+06	1.12226e+06	1.13986e+06	574071	1.04768e+06
Q8BFY6	Peflin [OS=Mus musculus]	Pef1	6.98892e+06	5.95681e+06	5.98096e+06	5.26266e+06	4.78203e+06	5.56349e+06	5.88025e+06	6.03032e+06	6.47317e+06	5.93271e+06	6.53217e+06	6.23597e+06
O08576	RUN domain-containing protein 3A [OS=Mus musculus]	Rundc3a	1.64399e+06	1.56146e+06	671816	611012	920770	1.37359e+06	1.32363e+06	1.13145e+06	1.47665e+06	1.33533e+06	1.4165e+06	1.36687e+06
Q61207	Prosaposin [OS=Mus musculus]	Psap	3.409e+06	4.85453e+06	2.56924e+06	2.56981e+06	6.17838e+06	4.48542e+06	7.55664e+06	4.67429e+06	4.8439e+06	3.61463e+06	3.38147e+06	2.94088e+06
Q9CQ54	NADH dehydrogenase [ubiquinone] 1 subunit C2 [OS=Mus musculus]	Ndufc2	6.37083e+06	7.75867e+06	7.65897e+06	9.15658e+06	7.08224e+06	4.99962e+06	7.7501e+06	6.91876e+06	5.15276e+06	6.03505e+06	7.15988e+06	7.34663e+06
P27659	60S ribosomal protein L3 [OS=Mus musculus]	Rpl3	3.57478e+06	3.45098e+06	3.43688e+06	2.86957e+06	4.22493e+06	3.75463e+06	4.82568e+06	4.22882e+06	3.32395e+06	2.65223e+06	3.73524e+06	2.85973e+06
Q8BL86	Acyl-coenzyme A thioesterase MBLAC2 [OS=Mus musculus]	Mblac2	2.29354e+06	2.70123e+06	3.18329e+06	2.75601e+06	3.12919e+06	2.06269e+06	2.13606e+06	1.72143e+06	2.77892e+06	3.1403e+06	3.02901e+06	2.42593e+06
Q9D8U8	Sorting nexin-5 [OS=Mus musculus]	Snx5	2.54851e+06	1.36434e+06	2.21119e+06	2.72628e+06	2.61166e+06	2.31831e+06	3.15761e+06	2.67202e+06	1.65392e+06	1.91031e+06	2.26041e+06	1.58522e+06
Q8R5J9	PRA1 family protein 3 [OS=Mus musculus]	Arl6ip5	9.5468e+06	9.9581e+06	9.92468e+06	9.27045e+06	8.35554e+06	9.06049e+06	1.00602e+07	9.50061e+06	9.24573e+06	8.57307e+06	9.8998e+06	9.81709e+06
Q9D517	1-acyl-sn-glycerol-3-phosphate acyltransferase gamma [OS=Mus musculus]	Agpat3	1.50204e+07	1.31247e+07	1.42063e+07	1.38069e+07	1.52179e+07	1.30143e+07	1.39725e+07	1.39608e+07	1.05909e+07	1.25237e+07	1.09948e+07	1.13434e+07
Q9D8E6	60S ribosomal protein L4 [OS=Mus musculus]	Rpl4	2.25746e+06	2.88609e+06	2.66343e+06	2.36433e+06	3.31984e+06	2.9414e+06	3.82127e+06	4.518e+06	2.81739e+06	1.93164e+06	3.29275e+06	3.25835e+06
P54754	Ephrin type-B receptor 3 [OS=Mus musculus]	Ephb3	1.6393e+06	1.16127e+06	1.49082e+06	1.62776e+06	811181	5.38086e+06	1.08334e+06	3.76076e+06	1.52038e+06	1.76627e+06	656357	583075
P52503	NADH dehydrogenase [ubiquinone] iron-sulfur protein 6, mitochondrial [OS=Mus musculus]	Ndufs6	1.12336e+07	9.806e+06	8.11832e+06	1.15726e+07	8.69135e+06	8.10833e+06	9273777	8.59968e+06	1.00129e+07	1.04329e+07	1.21595e+07	9.32081e+06
Q9CQJ8	NADH dehydrogenase [ubiquinone] 1 beta subcomplex subunit 9 [OS=Mus musculus]	Ndufb9	2.89691e+06	3.7068e+06	2.42392e+06	2.55409e+06	2.34713e+06	2.67324e+06	2.88936e+06	1.84717e+06	2.52498e+06	2.76335e+06	3.07637e+06	3.97335e+06
O70251	Elongation factor 1-beta [OS=Mus musculus]	Eef1b	4.51358e+06	5.84259e+06	5.21889e+06	5.36916e+06	5.92891e+06	7.41102e+06	6.10933e+06	6.04575e+06	5.80471e+06	5.36294e+06	5.28956e+06	5.16581e+06
O35215	D-dopachrome decarboxylase [OS=Mus musculus]	Ddt	8.14917e+06	9.1826e+06	7.83766e+06	9.26414e+06	8.78252e+06	1.08913e+07	7.94248e+06	8.17983e+06	7.88601e+06	9.32015e+06	6.9502e+06	7.75092e+06
Q8R0H9	ADP-ribosylation factor-binding protein GGA1 [OS=Mus musculus]	Gga1	677369	631490	772101	692164	690043	644313	602584	493173	827474	733114	874316	665592
Q8C079	Striatin-interacting protein 1 [OS=Mus musculus]	Strip1	1.24777e+06	1.48618e+06	1.36949e+06	1.09414e+06	879564	1.34422e+06	1.49814e+06	1.31538e+06	1.10451e+06	1.63989e+06	1.65283e+06	1.48913e+06
P03921	NADH-ubiquinone oxidoreductase chain 5 [OS=Mus musculus]	Mtnd5	3.55869e+06	3.53867e+06	4.31677e+06	4.23627e+06	3.24884e+06	1.66005e+06	2.74246e+06	4.3961e+06	3.70869e+06	3.31202e+06	4.01951e+06	4.80752e+06
Q9DC70	NADH dehydrogenase [ubiquinone] iron-sulfur protein 7, mitochondrial [OS=Mus musculus]	Ndufs7	6.33317e+06	5.69627e+06	6.7871e+06	6.51515e+06	6.79501e+06	4.11648e+06	6.53026e+06	5.33522e+06	5.68003e+06	4.76388e+06	7.97517e+06	6.406e+06
Q91Z61	GTP-binding protein Di-Ras1 [OS=Mus musculus]	Diras1	4.3924e+06	4.7539e+06	4.34268e+06	3.92644e+06	4.93817e+06	4.53977e+06	4.90756e+06	4.38907e+06	4.11937e+06	4.3953e+06	4.32903e+06	3.5525e+06
Q7TPB0	Phospholipid phosphatase-related protein type 3 [OS=Mus musculus]	Plppr3	1.63523e+06	1.5507e+06	1.68651e+06	925310	850595	1.87234e+06	948821	1.28708e+06	2.60308e+06	3.00699e+06	2.64038e+06	3.00451e+06
Q62192	CD180 antigen [OS=Mus musculus]	Cd180		31949.4		30503.3	549245	336181	674762	779300			39568.2	45044.7
P34022	Ran-specific GTPase-activating protein [OS=Mus musculus]	Ranbp1	6.76314e+06	7.71995e+06	7.96846e+06	7.16317e+06	7.59399e+06	7.75338e+06	8.0581e+06	6.64084e+06	8.38419e+06	7.90953e+06	8.31928e+06	7.24245e+06
Q922H2	[Pyruvate dehydrogenase (acetyl-transferring)] kinase isozyme 3, mitochondrial [OS=Mus musculus]	Pdk3	568828	1.32172e+06	1.17501e+06	883289	740142	656738	929886	842813	789702	1.33605e+06	1.30283e+06	1.51132e+06
Q5RKR3	Immunoglobulin superfamily containing leucine-rich repeat protein 2 [OS=Mus musculus]	Islr2	1.52106e+06	1.46789e+06	1.11504e+06	1.78407e+06	1.77098e+06	1.72783e+06	1.66305e+06	1.70763e+06	831305	1.01306e+06	772037	1.02743e+06
Q62178	Semaphorin-4A [OS=Mus musculus]	Sema4a	1.76963e+06	1.44435e+06	1.83701e+06	1.4686e+06	1.91703e+06	1.73428e+06	2.37381e+06	1.79619e+06	1.17334e+06	918972	1.47742e+06	1.11721e+06
O35639	Annexin A3 [OS=Mus musculus]	Anxa3	2.02887e+06	2.24865e+06	1.67094e+06	1.89627e+06	2.76027e+06	2.98877e+06	3.09948e+06	3.02473e+06	1.49028e+06	1.7347e+06	2.20689e+06	1.49895e+06
Q9DB60	Prostamide/prostaglandin F synthase [OS=Mus musculus]	Prxl2b	2.6314e+06	3.0095e+06	2.4379e+06	2.42916e+06	2.76994e+06	2.4607e+06	2.5967e+06	2.52612e+06	2.68235e+06	3.10536e+06	2.74488e+06	2.55099e+06
P24549	Aldehyde dehydrogenase 1A1 [OS=Mus musculus]	Aldh1a1	1.40589e+06	2.61204e+06	1.93283e+06	2.92557e+06	2.58705e+06	2.42519e+06	2.01022e+06	2.75714e+06	1.8187e+06	2.2081e+06	2.54756e+06	2.07214e+06
Q9JM76	Actin-related protein 2/3 complex subunit 3 [OS=Mus musculus]	Arpc3	1.43119e+07	1.43271e+07	1.36835e+07	1.22197e+07	1.24658e+07	1.22869e+07	1.15651e+07	1.35129e+07	1.47958e+07	1.49055e+07	1.42881e+07	1.77378e+07
O70435	Proteasome subunit alpha type-3 [OS=Mus musculus]	Psma3	9.16224e+06	9.60672e+06	9.53763e+06	1.00906e+07	8.42004e+06	9.55768e+06	1.01772e+07	9.97686e+06	9701393	9.28677e+06	1.04002e+07	1.03097e+07
Q99MX7	Transmembrane protein 121B [OS=Mus musculus]	Tmem121b	2.88209e+06	3.48901e+06	2.90888e+06	3.30362e+06	3.33048e+06	4.26608e+06	3.77983e+06	3.74775e+06	3.52293e+06	2.87302e+06	2.84757e+06	2.99905e+06
Q9CXZ1	NADH dehydrogenase [ubiquinone] iron-sulfur protein 4, mitochondrial [OS=Mus musculus]	Ndufs4	4.59768e+06	5.04951e+06	4.45807e+06	5.24752e+06	4.97452e+06	4.53353e+06	4.35148e+06	4.85406e+06	3.64843e+06	3.76961e+06	5.51346e+06	4.92056e+06
Q9CQX8	Alpha-ketoglutarate dehydrogenase component 4 [OS=Mus musculus]	Mrps36	7.0929e+06	4.16779e+06	3.55354e+06	3.82409e+06	3.29897e+06	5.98619e+06	6.39492e+06	3.16876e+06	2.49564e+06	2.87324e+06	3.15475e+06	3.94021e+06
Q3TY86	Apoptosis-inducing factor 3 [OS=Mus musculus]	Aifm3	4.18988e+06	4.24838e+06	4.26174e+06	4.48721e+06	4.80802e+06	5.40279e+06	4.39212e+06	4.16509e+06	5.32607e+06	5.20192e+06	4.99769e+06	4.33216e+06
Q9DC28	Casein kinase I isoform delta [OS=Mus musculus]	Csnk1d	2.25778e+06	417524	2.22721e+06	2.02372e+06	1.74478e+06	1.73848e+06	1.77145e+06	418879	1.66591e+06	1.82126e+06	1.58977e+06	1.57021e+06
Q9QYA2	Mitochondrial import receptor subunit TOM40 homolog [OS=Mus musculus]	Tomm40	2.06813e+06	2.22308e+06	2.43971e+06	1.95236e+06	2.82596e+06	1.54045e+06	2.37239e+06	1.94167e+06	2.0284e+06	2.15608e+06	2.58484e+06	1.93567e+06
Q8BMJ2	Leucine--tRNA ligase, cytoplasmic [OS=Mus musculus]	Lars1	931649	2.08211e+06	1.47059e+06	1.18294e+06	1.7442e+06	1.6113e+06	1.41065e+06	1.98025e+06	1.69143e+06	1.95591e+06	1.35157e+06	1.66382e+06
P51410	60S ribosomal protein L9 [OS=Mus musculus]	Rpl9	4.14373e+06	4.43034e+06	4.00615e+06	3.66351e+06	3.81226e+06	4.32539e+06	3.85817e+06	4.14128e+06	4.60457e+06	3.90404e+06	3.96407e+06	3.13887e+06
Q8R3P0	Aspartoacylase [OS=Mus musculus]	Aspa	4.08973e+06	5.31611e+06	4.82268e+06	4.21483e+06	6.60259e+06	4.60437e+06	4.7065e+06	4.15216e+06	4.47709e+06	5.29244e+06	3.80103e+06	5.55408e+06
Q8K354	Carbonyl reductase [NADPH] 3 [OS=Mus musculus]	Cbr3	1.86133e+06	3.51946e+06	2.41246e+06	2.98368e+06	2.79801e+06	4.64574e+06	3.39055e+06	4.91866e+06	3.64476e+06	2.84978e+06	3.036e+06	3.96101e+06
Q8CHU3	Epsin-2 [OS=Mus musculus]	Epn2	3.59783e+06	2.91824e+06	3.22468e+06	3.29876e+06	3.4888e+06	4.41965e+06	3.65808e+06	3.36506e+06	2.83572e+06	3.51583e+06	3.47157e+06	3.20108e+06
Q8VCD6	Receptor expression-enhancing protein 2 [OS=Mus musculus]	Reep2	3.48823e+06	3.5033e+06	3.66765e+06	3.70282e+06	3.42847e+06	3.40549e+06	3.49352e+06	3.16518e+06	2.99881e+06	3.21013e+06	2.9631e+06	2.5679e+06
P61329	Fibroblast growth factor 12 [OS=Mus musculus]	Fgf12	4.32694e+06	4.15472e+06	3.94834e+06	4.707e+06	4.44198e+06	4.80737e+06	4.06428e+06	4.35981e+06	4.35761e+06	4.46544e+06	3.88726e+06	4.23559e+06
Q6P4S6	Serine/threonine-protein kinase SIK3 [OS=Mus musculus]	Sik3	3.26495e+06	3.21041e+06	2.98466e+06	3.01959e+06	3.36907e+06	3.00683e+06	3.09177e+06	2.69484e+06	3.3137e+06	3.82608e+06	3.34129e+06	3.32703e+06
Q9QXW9	Large neutral amino acids transporter small subunit 2 [OS=Mus musculus]	Slc7a8	4.18517e+06	5.5238e+06	5.16152e+06	4.73747e+06	4.57054e+06	5.31324e+06	5.09404e+06	5.46052e+06	5.43113e+06	5.27766e+06	4.98269e+06	4.54585e+06
Q0VBD0	Integrin beta-8 [OS=Mus musculus]	Itgb8	2.18381e+06	2.14348e+06	2.02225e+06	2.07433e+06	2.43491e+06	2.43743e+06	1.85532e+06	1.88278e+06	2.32838e+06	2.33126e+06	2.11351e+06	2.39752e+06
Q9JMK2	Casein kinase I isoform epsilon [OS=Mus musculus]	Csnk1e	2.7308e+06	2.98537e+06	3.71741e+06	3.07909e+06	3.78227e+06	2.81809e+06	2.4883e+06	2.97837e+06	3.49521e+06	2.854e+06	2.60402e+06	2.878e+06
Q9D2M8	Ubiquitin-conjugating enzyme E2 variant 2 [OS=Mus musculus]	Ube2v2		326024	246326		240323	281183	198915	494898	303556	225831	286044	466906
P10107	Annexin A1 [OS=Mus musculus]	Anxa1	1.02899e+06	1.76291e+06	453298	879115	1.41096e+06	1.21031e+06	1.40882e+06	1.85095e+06			203159	41614.1
Q9Z127	Large neutral amino acids transporter small subunit 1 [OS=Mus musculus]	Slc7a5	6.52556e+06	7.36059e+06	7.35587e+06	6.86933e+06	7.55718e+06	8.62469e+06	7.08473e+06	7.65571e+06	7.93934e+06	7.53501e+06	6.20828e+06	6.72356e+06
Q8R0A5	Transcription elongation factor A protein-like 3 [OS=Mus musculus]	Tceal3	412889	522730	356688	582898	678922	849607	432561	394349	473931	387795	325805	416457
Q9D1Q6	Endoplasmic reticulum resident protein 44 [OS=Mus musculus]	Erp44	1.28789e+06	1.34621e+06	937628	919590	1.6898e+06	1.0779e+06	2.12109e+06	1.50995e+06	1.19747e+06	1.39254e+06	1.62995e+06	1.49849e+06
Q9D855	Cytochrome b-c1 complex subunit 7 [OS=Mus musculus]	Uqcrb	1.96741e+07	2.43448e+07	2.3203e+07	2.50252e+07	2.12389e+07	1.51736e+07	2.01644e+07	2.01861e+07	1.85643e+07	1.97773e+07	2.44574e+07	2.12125e+07
P28658	Ataxin-10 [OS=Mus musculus]	Atxn10	1.33792e+06	1.24526e+06	1.68516e+06	1.71761e+06	1.5898e+06	1.75904e+06	2.02785e+06	1.78958e+06	1.99603e+06	1.97531e+06	1.80443e+06	1.92331e+06
Q9CPU4	Microsomal glutathione S-transferase 3 [OS=Mus musculus]	Mgst3	5.14662e+06	8.38482e+06	1.02145e+07	1.19465e+07	7.35919e+06	3.75958e+06	6.51535e+06	1.31608e+07	1.30919e+07	8.10022e+06	8.33667e+06	7.04659e+06
Q8CGA0	Protein phosphatase 1F [OS=Mus musculus]	Ppm1f	1.06169e+06	1.26417e+06	1.11955e+06	1.18275e+06	1.39714e+06	1.10028e+06	921836	1.56859e+06	1.25815e+06	1.44395e+06	1.66287e+06	1.40334e+06
Q99JY0	Trifunctional enzyme subunit beta, mitochondrial [OS=Mus musculus]	Hadhb	2.29543e+06	2.25436e+06	2.30134e+06	1.88544e+06	1.90176e+06	1.21826e+06	2.35095e+06	1.77613e+06	1.82961e+06	2.25256e+06	2.52571e+06	2.35284e+06
S4R1M9	Oxysterol-binding protein-related protein 10 [OS=Mus musculus]	Osbpl10	2.59759e+06	2.96149e+06	2.44252e+06	3.09096e+06	2.38851e+06	2.4619e+06	2734471	2.82933e+06	3.06323e+06	3.29422e+06	3.82329e+06	3.45256e+06
Q6GYP7	Ral GTPase-activating protein subunit alpha-1 [OS=Mus musculus]	Ralgapa1	1.35007e+06	1.23515e+06	1.11326e+06	684092	1.0804e+06	1.51727e+06	1.21115e+06	1.542e+06	654641	417137	173373	306428
Q6ZQ82	Rho GTPase-activating protein 26 [OS=Mus musculus]	Arhgap26	2.32781e+06	2.51883e+06	2.4653e+06	2.76864e+06	2.6317e+06	2.92688e+06	2.69049e+06	2.61988e+06	2.8287e+06	2.39182e+06	2.40131e+06	2.43912e+06
O54734	Dolichyl-diphosphooligosaccharide--protein glycosyltransferase 48 kDa subunit [OS=Mus musculus]	Ddost	1.62732e+06	2.12827e+06	2.56117e+06	1.98064e+06	2.78344e+06	2024338	2.56176e+06	2.75674e+06	1.4794e+06	1.62187e+06	2.69689e+06	2.05283e+06
Q8R2Y0	Monoacylglycerol lipase ABHD6 [OS=Mus musculus]	Abhd6	6.54058e+06	6.94071e+06	5.52274e+06	6.89328e+06	6.87112e+06	5.98416e+06	7.15914e+06	7.41348e+06	5.68693e+06	5.51299e+06	5.31502e+06	6.97251e+06
Q7TPD3	Roundabout homolog 2 [OS=Mus musculus]	Robo2	1.22562e+06	1.15903e+06	859845	1.13391e+06	786844	1.25095e+06	838084	1.06376e+06	1.74783e+06	1.39711e+06	1.49781e+06	1.52559e+06
A6X935	Inter alpha-trypsin inhibitor, heavy chain 4 [OS=Mus musculus]	Itih4	1.00252e+06	1.02592e+06	1.1782e+06	1.01287e+06	1.4001e+06	664087	1.2196e+06	1.5252e+06	30966.4	32890.4	18523
Q8C7K6	Prenylcysteine oxidase-like [OS=Mus musculus]	Pcyox1l	1.75924e+06	2.04159e+06	1.73783e+06	1.9817e+06	2.26547e+06	1.41583e+06	2.47974e+06	2.2774e+06	1.78059e+06	1.88938e+06	2.017e+06	1.45464e+06
O35083	1-acyl-sn-glycerol-3-phosphate acyltransferase alpha [OS=Mus musculus]	Agpat1	3.73559e+06	3.94385e+06	3.4327e+06	3.4798e+06	3.73924e+06	3.4379e+06	4.02371e+06	3.89296e+06	4.26233e+06	4.09327e+06	3.59848e+06	2.54045e+06
O55029	Coatomer subunit beta' [OS=Mus musculus]	Copb2	3.92989e+06	4.72864e+06	4.3243e+06	4.43258e+06	4.21433e+06	3.18677e+06	4.87567e+06	4.614e+06	3.42042e+06	3.9101e+06	4.81377e+06	4.13901e+06
Q8BGD5	Carnitine O-palmitoyltransferase 1, brain isoform [OS=Mus musculus]	Cpt1c	1.05157e+06	1.16454e+06	1.04004e+06	1.06029e+06	1.45522e+06	1.15681e+06	1.24439e+06	1.64608e+06	1.66696e+06	1.19241e+06	1.47432e+06	1.37936e+06
O89051	Integral membrane protein 2B [OS=Mus musculus]	Itm2b	3.37635e+06	3.10176e+06	2.60185e+06	2.87114e+06	3.67464e+06	3.81192e+06	4.22551e+06	3.72308e+06	2.82214e+06	2.51864e+06	2.72341e+06	2.59072e+06
Q8BFU3	RING finger protein 214 [OS=Mus musculus]	Rnf214	720999	834269	617205	780929	696902	822660	490888	377316	442072	835964	704192	695645
P32020	Sterol carrier protein 2 [OS=Mus musculus]	Scp2	5.62596e+06	5.26791e+06	5.49141e+06	5.29606e+06	5.807e+06	6.78732e+06	5.76467e+06	6.36289e+06	4.64968e+06	4.91886e+06	4.18393e+06	4.4359e+06
Q3TVA9	Coiled-coil domain-containing protein 136 [OS=Mus musculus]	Ccdc136	1.78693e+06	1.62133e+06	965999	1.22597e+06	651102	2.6895e+06	2.22225e+06	962620	2.08423e+06	2.11322e+06	1.85862e+06	1.34952e+06
Q99KN9	Clathrin interactor 1 [OS=Mus musculus]	Clint1	2.50325e+06	2.30089e+06	2.59682e+06	1.57152e+06	2.73902e+06	2.45271e+06	2.83251e+06	2.30722e+06	2.39989e+06	2.26831e+06	2.25795e+06	2.26848e+06
P56395	Cytochrome b5 [OS=Mus musculus]	Cyb5a	7.45869e+06	6.85246e+06	6.81679e+06	7.23366e+06	7.67014e+06	8.69931e+06	7.74486e+06	6.36286e+06	5.62751e+06	5.74332e+06	5.74827e+06	5.43874e+06
Q3B7Z2	Oxysterol-binding protein 1 [OS=Mus musculus]	Osbp	1.07414e+06	1.57684e+06	1.61887e+06	1.04325e+06	1.80699e+06	1.09904e+06	1.35762e+06	1.0633e+06	3.65538e+06	1.4475e+06	1.62584e+06	1.12099e+06
Q80XR2	Calcium-transporting ATPase type 2C member 1 [OS=Mus musculus]	Atp2c1	529073	1.15662e+06	1.45921e+06	894164	1.01441e+06	616703	1.22001e+06	641466	1.17986e+06	1.50842e+06	1.05813e+06	1.41683e+06
Q91VK4	Integral membrane protein 2C [OS=Mus musculus]	Itm2c	1.90228e+07	2.28442e+07	1.77839e+07	1.60508e+07	1.94213e+07	1.98009e+07	2.06853e+07	1.71604e+07	1.82825e+07	2.09985e+07	1.84066e+07	1.71529e+07
Q60771	Claudin-11 [OS=Mus musculus]	Cldn11	1.98375e+07	2.06849e+07	2.22803e+07	2.54968e+07	3.25363e+07	1.46828e+07	2.4081e+07	2.52897e+07	1.43813e+07	2.90577e+07	2.3504e+07	2.59307e+07
Q9EQ06	Estradiol 17-beta-dehydrogenase 11 [OS=Mus musculus]	Hsd17b11	3.58464e+06	3.28983e+06	3.2755e+06	3.34134e+06	3.46418e+06	2.85848e+06	3.05247e+06	3.1842e+06	3.39513e+06	3.34336e+06	3.55505e+06	3.64279e+06
Q9R0Q7	Prostaglandin E synthase 3 [OS=Mus musculus]	Ptges3	1.08517e+07	1.09066e+07	1.12546e+07	1.01399e+07	1.21806e+07	1.40998e+07	1.21366e+07	1.05169e+07	1.32159e+07	1.23347e+07	1.26863e+07	1.12384e+07
O09044	Synaptosomal-associated protein 23 [OS=Mus musculus]	Snap23	1.08891e+06	826091	780804	893815	1.49295e+06	1.91484e+06	1.64602e+06	1.56127e+06	528263	972158	1.15283e+06	658613
Q80Y24	Prickle-like protein 2 [OS=Mus musculus]	Prickle2	3.00993e+06	2.78557e+06	3.00729e+06	2.56059e+06	3.09808e+06	2.35764e+06	2.68752e+06	2.25822e+06	2.89256e+06	2.99063e+06	3.60187e+06	3.46084e+06
P35979	60S ribosomal protein L12 [OS=Mus musculus]	Rpl12	2.77965e+06	3.31505e+06	2.67374e+06	2.56796e+06	4.25407e+06	3.56632e+06	4.97652e+06	3.98565e+06	2.99012e+06	2.27478e+06	2.85591e+06	2.91943e+06
P97449	Aminopeptidase N [OS=Mus musculus]	Anpep	148370	318971	104078	111101	335991	506371	781164	591463	337439	358096	321975	143849
Q8BWT5	Disco-interacting protein 2 homolog A [OS=Mus musculus]	Dip2a	1.4631e+06	994484	1.24681e+06	1.44119e+06	1.54582e+06	1.54028e+06	1.53137e+06	1.54443e+06	1.51005e+06	1.84688e+06	1.84971e+06	1.87635e+06
Q9JKK1	Syntaxin-6 [OS=Mus musculus]	Stx6	8.90726e+06	9.50757e+06	8.35282e+06	9.24198e+06	8.45257e+06	9.72775e+06	8.66566e+06	9.21746e+06	7.07427e+06	6.76159e+06	9.20082e+06	8.76813e+06
Q9ERR1	Nuclear distribution protein nudE-like 1 [OS=Mus musculus]	Ndel1	2.2319e+06	2.24413e+06	2.19567e+06	2.22727e+06	2.30626e+06	2.42567e+06	1.7153e+06	1.70487e+06	2.1223e+06	2.59685e+06	2.26022e+06	1.98594e+06
P07309	Transthyretin [OS=Mus musculus]	Ttr	1.09391e+07	1.2255e+07	9.0155e+06	1.22484e+07	1.18737e+07	1.0928e+07	8.18693e+06	1.03504e+07	3.84276e+06	887154	3.71588e+06	151190
Q8BXK8	Arf-GAP with GTPase, ANK repeat and PH domain-containing protein 1 [OS=Mus musculus]	Agap1	567483	492490	456560	469741	558850	683632	641309	551844	620382	486392	606711	996556
Q9D164	FXYD domain-containing ion transport regulator 6 [OS=Mus musculus]	Fxyd6	6.92227e+06	7.24104e+06	8.14767e+06	7.22738e+06	5.4694e+06	6.06008e+06	6.39031e+06	7.95058e+06	9.27328e+06	1.11714e+07	1.05505e+07	1.04539e+07
O35343	Importin subunit alpha-3 [OS=Mus musculus]	Kpna4	540333	429822	261016	398471	304652	307166	279540	451259	431243	509721	495792	399747
O35609	Secretory carrier-associated membrane protein 3 [OS=Mus musculus]	Scamp3	9.07689e+06	9.42052e+06	7.99551e+06	8.34636e+06	8.74734e+06	1.01384e+07	8.5041e+06	7.25746e+06	9.39948e+06	9.95489e+06	8.915e+06	7.70559e+06
O35685	Nuclear migration protein nudC [OS=Mus musculus]	Nudc	3.56467e+06	3.67046e+06	2.61845e+06	2.64061e+06	3.39594e+06	3.92221e+06	3.99914e+06	2.89367e+06	4.06672e+06	3.60351e+06	3.73422e+06	4.1047e+06
A2AHC3	Calmodulin-regulated spectrin-associated protein 1 [OS=Mus musculus]	Camsap1	1.19059e+06	1.05922e+06	801876	694051	955534	1.12542e+06	888446	905312	1.14443e+06	1.04702e+06	1.0893e+06	1.25327e+06
Q3UIU2	NADH dehydrogenase [ubiquinone] 1 beta subcomplex subunit 6 [OS=Mus musculus]	Ndufb6	3.32892e+06	3.93399e+06	3.89936e+06	4.56165e+06	3.69446e+06	2.34583e+06	3.56313e+06	4.20384e+06	3.67311e+06	3.51523e+06	4.79587e+06	3.83112e+06
P97384	Annexin A11 [OS=Mus musculus]	Anxa11	6.08641e+06	7.77427e+06	7.56445e+06	7.00195e+06	6.78007e+06	8.04687e+06	7784900	9.67497e+06	5.78438e+06	4.88726e+06	6.45296e+06	7.57422e+06
Q9D023	Mitochondrial pyruvate carrier 2 [OS=Mus musculus]	Mpc2	4.66695e+06	6.25467e+06	5.94095e+06	5.94054e+06	5.84711e+06	3.85639e+06	5.89182e+06	5.87001e+06	4.75799e+06	4.46439e+06	6.07324e+06	5.51382e+06
Q99MR3	Solute carrier family 12 member 9 [OS=Mus musculus]	Slc12a9	667225	829285	534406	598325	1.06538e+06	717582	1.13978e+06	1.42126e+06	645118	570342	964027	726873
Q91W50	Cold shock domain-containing protein E1 [OS=Mus musculus]	Csde1	1.29384e+06	1.72249e+06	2.0045e+06	1.96299e+06	2.09966e+06	2.21858e+06	1.81936e+06	1.79432e+06	1.95474e+06	1.51864e+06	1.87421e+06	1.50635e+06
P59281	Rho GTPase-activating protein 39 [OS=Mus musculus]	Arhgap39	2.10585e+06	2.18422e+06	1.70411e+06	1.65511e+06	1.42156e+06	1.27555e+06	1.46007e+06	1.76458e+06	2.21739e+06	1.31843e+06	1.84403e+06	2.10031e+06
Q9CRB9	MICOS complex subunit Mic19 [OS=Mus musculus]	Chchd3	5.70988e+06	5.4099e+06	5.45573e+06	5.47708e+06	5.31978e+06	4.98456e+06	5.98704e+06	5.08834e+06	4.65566e+06	5.35382e+06	5.87982e+06	4.74651e+06
Q8R307	Vacuolar protein sorting-associated protein 18 homolog [OS=Mus musculus]	Vps18	927321	926722	669922	845957	1.33369e+06	1.22576e+06	1.13677e+06	1.37579e+06	929088	1.07595e+06	965597	1.23984e+06
P20352	Tissue factor [OS=Mus musculus]	F3	2.96159e+06	2.71277e+06	2.41089e+06	2.39267e+06	3.94506e+06	5.39518e+06	3.2944e+06	2.51351e+06	3.10596e+06	3.28136e+06	9.28352e+06	2.6256e+06
Q9DD18	D-aminoacyl-tRNA deacylase 1 [OS=Mus musculus]	Dtd1	3.38384e+06	3.13504e+06	3.34148e+06	3.57832e+06	3.39666e+06	3.7903e+06	3.31235e+06	3.47978e+06	3.00978e+06	3.85901e+06	3.59771e+06	3.37642e+06
Q6ZWR6	Nesprin-1 [OS=Mus musculus]	Syne1	5.01797e+06	4.53938e+06	5.07532e+06	6.67928e+06	5.01234e+06	3.49061e+06	4.89069e+06	3.59399e+06	3.80514e+06	4.27849e+06	5.57112e+06	4.17236e+06
P60521	Gamma-aminobutyric acid receptor-associated protein-like 2 [OS=Mus musculus]	Gabarapl2	8.11432e+06	7.34923e+06	8.53846e+06	7.4237e+06	7.37463e+06	9.31109e+06	7.42986e+06	7.09774e+06	1.05853e+07	9.34398e+06	8.95288e+06	8.36981e+06
Q91ZA3	Propionyl-CoA carboxylase alpha chain, mitochondrial [OS=Mus musculus]	Pcca	1.57165e+06	1.68139e+06	1.63033e+06	1.72749e+06	1.67342e+06	939655	1.4729e+06	1.44722e+06	1.01866e+06	1.61919e+06	1.74377e+06	1.60615e+06
Q8C0P5	Coronin-2A [OS=Mus musculus]	Coro2a	1.79961e+06	2.2457e+06	2.18058e+06	2.41887e+06	2.2487e+06	2.22144e+06	2.80311e+06	2.99075e+06	2.11076e+06	2.38645e+06	2.28467e+06	2.32544e+06
Q6PHS9	Voltage-dependent calcium channel subunit alpha-2/delta-2 [OS=Mus musculus]	Cacna2d2	1.79117e+06	1.21754e+06	1.6977e+06	1.75438e+06	1.53654e+06	1.0538e+06	1.13426e+06	1.67409e+06	1.21588e+06	1.43458e+06	1.18362e+06	1.51143e+06
Q6PCP5	Mitochondrial fission factor [OS=Mus musculus]	Mff	2.43149e+06	2.87368e+06	2.80829e+06	2.76561e+06	2.61594e+06	2.05837e+06	2.44195e+06	2.56933e+06	2.58653e+06	2.57968e+06	3.31537e+06	3.45859e+06
O08585	Clathrin light chain A [OS=Mus musculus]	Clta	4.78084e+07	4.49588e+07	4.67653e+07	4.98392e+07	5.46113e+07	5.0663e+07	5.26737e+07	4.14108e+07	3.68528e+07	3.96293e+07	3.18093e+07	4.13784e+07
Q9QZB0	Regulator of G-protein signaling 17 [OS=Mus musculus]	Rgs17	1.34161e+06	1.34831e+06	1.32563e+06	1.24733e+06	1.19231e+06	1.07335e+06	1.16742e+06	1.54575e+06	1.92171e+06	2.13094e+06	1.32392e+06	2.09411e+06
Q9JI90	E3 ubiquitin-protein ligase RNF14 [OS=Mus musculus]	Rnf14	1.22468e+06	953182	1.11792e+06	1.22228e+06	1.13971e+06	1.32923e+06	1.67646e+06	1.01823e+06	962159	854128	861094	720621
O70493	Sorting nexin-12 [OS=Mus musculus]	Snx12	5.36648e+07	4.11318e+07	4.17016e+07	4.75885e+07	4.17872e+07	4.53874e+07	4.4299e+07	3.50017e+07	4.1649e+07	4.22022e+07	3.81091e+07	4.04614e+07
Q9D6J5	NADH dehydrogenase [ubiquinone] 1 beta subcomplex subunit 8, mitochondrial [OS=Mus musculus]	Ndufb8	4.21246e+06	4.00355e+06	4.84995e+06	5.36559e+06	4.714e+06	2.06943e+06	4.23687e+06	3.95942e+06	3.37991e+06	2.74368e+06	3.43238e+06	4.7075e+06
Q921E2	Ras-related protein Rab-31 [OS=Mus musculus]	Rab31	3.72901e+06	3.43313e+06	4.09376e+06	4.72382e+06	4.02841e+06	3.31819e+06	4.21373e+06	3.77442e+06	3.04925e+06	3.5275e+06	3.96433e+06	3.27771e+06
P04925	Major prion protein [OS=Mus musculus]	Prnp	2.12879e+07	2.02966e+07	2.07767e+07	1.89015e+07	2.5043e+07	2.72599e+07	2.28436e+07	2.49516e+07	2.59591e+07	2.75229e+07	2.36572e+07	2.14538e+07
Q6PDI5	Proteasome adapter and scaffold protein ECM29 [OS=Mus musculus]	Ecpas	299148	237164	228507	260250	301589	308463	274789	308962	277689	263800	294136	301880
P84086	Complexin-2 [OS=Mus musculus]	Cplx2	6.87769e+06	6.71807e+06	5.32119e+06	6.53596e+06	7.73827e+06	7.40426e+06	5.79802e+06	4.26688e+06	4.95817e+06	4.48881e+06	2.93482e+06	6.81615e+06
A2A432	Cullin-4B [OS=Mus musculus]	Cul4b	1.33157e+06	1.58658e+06	1.27198e+06	1.44911e+06	1.31303e+06	1.68249e+06	1.26144e+06	1.40812e+06	1.61002e+06	1.54671e+06	1.47267e+06	1.19445e+06
Q9WTU6	Mitogen-activated protein kinase 9 [OS=Mus musculus]	Mapk9	110577	79602.2	94479.8	101895	57613	100956	94221.2	121881	197236	92430.9
P50153	Guanine nucleotide-binding protein G(I)/G(S)/G(O) subunit gamma-4 [OS=Mus musculus]	Gng4	3.51585e+06	2.69993e+06	3.08617e+06	3.20399e+06	2.78444e+06	1.40055e+06	2.27127e+06	1.4446e+06	2.76083e+06	5.35919e+06	3.30338e+06	5.00918e+06
Q9CQA1	Trafficking protein particle complex subunit 5 [OS=Mus musculus]	Trappc5	1.04134e+07	9.048e+06	8.38377e+06	9.40342e+06	9.72419e+06	1.01339e+07	1.02272e+07	9.75229e+06	9.52245e+06	9.91058e+06	8.9406e+06	1.04655e+07
Q921J2	GTP-binding protein Rheb [OS=Mus musculus]	Rheb	7.46797e+06	8.10239e+06	8.06686e+06	7.59157e+06	8.33826e+06	8.54198e+06	8.94407e+06	8.21768e+06	8.28598e+06	8.26698e+06	7.66662e+06	8.09805e+06
Q8BFT9	Synaptic vesicle 2-related protein [OS=Mus musculus]	Svop	4.00883e+06	6.62771e+06	5.65929e+06	5.12153e+06	5.4261e+06	4.71819e+06	4.75504e+06	6.16707e+06	5.75404e+06	4.51388e+06	5.92583e+06	5.56197e+06
Q9DCW4	Electron transfer flavoprotein subunit beta [OS=Mus musculus]	Etfb	4.89738e+06	5.84233e+06	4.61961e+06	4.95257e+06	4.54406e+06	3.36392e+06	5.4723e+06	4.18966e+06	4.39755e+06	4.4595e+06	5.57201e+06	5.0611e+06
P54728	UV excision repair protein RAD23 homolog B [OS=Mus musculus]	Rad23b	2.89123e+06	2.12614e+06	2.62965e+06	3.13907e+06	3.4983e+06	2.74374e+06	3.02538e+06	3.0488e+06	3.65332e+06	2.74637e+06	3.81255e+06	3.68762e+06
Q8R050	Eukaryotic peptide chain release factor GTP-binding subunit ERF3A [OS=Mus musculus]	Gspt1	3.97897e+06	4.38383e+06	3.92431e+06	3.64186e+06	4.46918e+06	4.75766e+06	5.03563e+06	4.30629e+06	4.51815e+06	4.94517e+06	4.27194e+06	3.36892e+06
Q60960	Importin subunit alpha-5 [OS=Mus musculus]	Kpna1	1.13642e+06	1.12398e+06	1.17953e+06	1.3634e+06	1.31102e+06	1.20498e+06	1.16588e+06	1.22787e+06	1.24226e+06	1.05992e+06	1.06512e+06	1.22107e+06
Q8BGB7	Enolase-phosphatase E1 [OS=Mus musculus]	Enoph1	2.35491e+06	2.11712e+06	2.35096e+06	2.35138e+06	2.294e+06	1.63535e+06	1.82505e+06	2.31211e+06	2.55502e+06	2.79867e+06	2.53762e+06	2.47461e+06
Q8BWY3	Eukaryotic peptide chain release factor subunit 1 [OS=Mus musculus]	Etf1	1.66895e+06	1.74013e+06	1.30105e+06	1.4072e+06	1.89722e+06	1.89435e+06	1.99201e+06	2.12545e+06	1.91471e+06	1.73216e+06	1.92079e+06	1.73374e+06
Q3THS6	S-adenosylmethionine synthase isoform type-2 [OS=Mus musculus]	Mat2a	2.79114e+06	2.33031e+06	2.65151e+06	2.54473e+06	3.47459e+06	3.20997e+06	3.59845e+06	3.15956e+06	4.40472e+06	1.55544e+06	2.21563e+06	2.20095e+06
Q9JMH6	Thioredoxin reductase 1, cytoplasmic [OS=Mus musculus]	Txnrd1	2.06684e+06	1.86309e+06	1.87755e+06	2.13301e+06	2.1771e+06	2.51197e+06	2.22689e+06	2.55391e+06	2.01844e+06	1.99367e+06	2.01014e+06	2.03014e+06
Q9D8B3	Charged multivesicular body protein 4b [OS=Mus musculus]	Chmp4b	7.51145e+06	7.18115e+06	5.73858e+06	6.50939e+06	8.46264e+06	1.01834e+07	6.54728e+06	6.52124e+06	7.45156e+06	7.60893e+06	5.81933e+06	7.44093e+06
Q8VDZ4	Palmitoyltransferase ZDHHC5 [OS=Mus musculus]	Zdhhc5	1.52378e+06	1.0463e+06	1.18479e+06	648198	1.08574e+06	1.06828e+06	653663	1.21312e+06	894599	1.19835e+06	930321	849441
Q8BFZ9	Erlin-2 [OS=Mus musculus]	Erlin2	3.02287e+06	3.84526e+06	3.77075e+06	3.00667e+06	3.43475e+06	4.04148e+06	4.35785e+06	3.88157e+06	3.09742e+06	3.11133e+06	3.07129e+06	3.8623e+06
O08688	Calpain-5 [OS=Mus musculus]	Capn5	5.46619e+06	5.21321e+06	4.56497e+06	4.98309e+06	5.74611e+06	5.92455e+06	5.56204e+06	4.36417e+06	4.86798e+06	5.76283e+06	5.0916e+06	4.13577e+06
Q6PHZ8	Kv channel-interacting protein 4 [OS=Mus musculus]	Kcnip4	7.79666e+06	6.26332e+06	2.5699e+06	1.99974e+06	1.89674e+06	2.17067e+06	1.31393e+06	1.97613e+06	1.96013e+06	2.00169e+06	1.57502e+06	2.0543e+06
Q8R5H1	Ubiquitin carboxyl-terminal hydrolase 15 [OS=Mus musculus]	Usp15	462697	449474	449676	563942	476147	148088	375628	357341	1.26012e+06	434950	433389	2.03782e+06
Q9JMC3	DnaJ homolog subfamily A member 4 [OS=Mus musculus]	Dnaja4	1.95265e+06	2.26226e+06	2.28228e+06	2.52209e+06	2.02558e+06	2.25402e+06	2.07468e+06	2.33084e+06	2.66163e+06	2.77324e+06	2.57076e+06	2.68543e+06
Q9DCT8	Cysteine-rich protein 2 [OS=Mus musculus]	Crip2	5.54757e+06	5.98811e+06	5.0112e+06	5.98958e+06	6.70231e+06	5.90538e+06	6.26995e+06	6.22635e+06	7.72124e+06	7.87553e+06	6.04092e+06	8.08087e+06
P57716	Nicastrin [OS=Mus musculus]	Ncstn	2.37078e+06	2.26099e+06	2.34869e+06	2.25349e+06	2.96961e+06	2.9251e+06	3.0774e+06	2.95718e+06	2.33758e+06	2.0515e+06	2.38148e+06	2.28305e+06
Q9DBL7	Bifunctional coenzyme A synthase [OS=Mus musculus]	Coasy	572489	693410	381659	575445	646343	469608	604328	879501	693017	980097	646637	774172
Q3U0M1	Trafficking protein particle complex subunit 9 [OS=Mus musculus]	Trappc9	1.83928e+06	1.13756e+06	994655	1.19556e+06	1.34158e+06	1.57463e+06	1.91521e+06	1.2251e+06	2.05604e+06	1.73027e+06	1.45407e+06	1.7146e+06
P00397	Cytochrome c oxidase subunit 1 [OS=Mus musculus]	Mtco1	8.54008e+06	7.97101e+06	8.66068e+06	8.66975e+06	7.98916e+06	5.56989e+06	8.16947e+06	8.7276e+06	8.30476e+06	7.56955e+06	8.30295e+06	7.81534e+06
Q91YR1	Twinfilin-1 [OS=Mus musculus]	Twf1	3.04473e+06	3.27478e+06	3.52719e+06	2.98365e+06	3.25642e+06	3.33549e+06	3.13083e+06	2.84243e+06	3.41911e+06	3.29456e+06	3.5134e+06	3.41938e+06
Q9D2N9	Vacuolar protein sorting-associated protein 33A [OS=Mus musculus]	Vps33a	865313	1.03967e+06	911199	1.0308e+06	1.23698e+06	1.31335e+06	1.31976e+06	1.12548e+06	1.45147e+06	1.21961e+06	1.06191e+06	1.04456e+06
Q7TQ95	Endoplasmic reticulum junction formation protein lunapark [OS=Mus musculus]	Lnpk	6.28129e+06	3.47124e+06	6.73254e+06	3.71197e+06	5.68224e+06	4.29251e+06	5.78945e+06	3.99253e+06	6.82837e+06	4.50386e+06	8.92963e+06	4.65003e+06
G3X9K3	Brefeldin A-inhibited guanine nucleotide-exchange protein 1 [OS=Mus musculus]	Arfgef1	166659	118521	178499	225290	143892	130784	188244	251691	158696	175857	147527	209421
Q80TL7	Protein MON2 homolog [OS=Mus musculus]	Mon2	490260	420347	458047	391732	458809	394922	428954	694348	514722	482228	523655	767270
Q8VHL0	Urea transporter 1 [OS=Mus musculus]	Slc14a1	1.1513e+06	702925	942277	136889	1.27671e+06	923610	1.72181e+06	558960	1.01305e+06	731869	844613	353796
P98084	Amyloid-beta A4 precursor protein-binding family A member 2 [OS=Mus musculus]	Apba2	629574	662857	572515	531029	316199	568216	427130	262137	249469	457513	518073	576286
P19324	Serpin H1 [OS=Mus musculus]	Serpinh1	3.40934e+06	3.26074e+06	3.44302e+06	3.21092e+06	4.09919e+06	4.50311e+06	4.06959e+06	8.57473e+06	3.55872e+06	3.29839e+06	4.36414e+06	3.4788e+06
P54071	Isocitrate dehydrogenase [NADP], mitochondrial [OS=Mus musculus]	Idh2	2.05494e+06	3.28561e+06	2.44005e+06	2.70154e+06	1.76301e+06	1.94593e+06	2.2972e+06	2.22281e+06	2.10423e+06	2.5088e+06	3.57535e+06	2.86201e+06
Q6VNS1	NT-3 growth factor receptor [OS=Mus musculus]	Ntrk3	1.01166e+06	1.03337e+06	980216	834317	967334	806895	924145	852810	1.0318e+06	1.0904e+06	1.03694e+06	997834
Q6DFY8	BMP/retinoic acid-inducible neural-specific protein 2 [OS=Mus musculus]	Brinp2	1.54776e+06	1.17484e+06	1.36539e+06	1.28432e+06	1.20558e+06	1.1938e+06	877027	1.45918e+06	1.58047e+06	1.31324e+06	1.24967e+06	1.38732e+06
P49446	Receptor-type tyrosine-protein phosphatase epsilon [OS=Mus musculus]	Ptpre	2.61236e+06	2.56497e+06	2.82047e+06	2.41834e+06	2.1702e+06	2.1978e+06	2.24416e+06	2.08113e+06	2.56774e+06	2.84774e+06	2.6384e+06	2.40895e+06
Q8VE47	Ubiquitin-like modifier-activating enzyme 5 [OS=Mus musculus]	Uba5	917109	1.26968e+06	1.08275e+06	911444	823356	1.16832e+06	1.22452e+06	817864	1.36793e+06	1.13814e+06	1.41193e+06	1.25459e+06
P34914	Bifunctional epoxide hydrolase 2 [OS=Mus musculus]	Ephx2	957556	699246	1.25485e+06	545157	1.02995e+06	850577	1.08457e+06	1.41649e+06	1.9844e+06	1.65853e+06	1.64457e+06	1.6539e+06
Q6PD26	GPI transamidase component PIG-S [OS=Mus musculus]	Pigs	179292	237414	181195	216010	277041	232883	257949	336520	342048	234847	235658	302650
Q8VI75	Importin-4 [OS=Mus musculus]	Ipo4	212253	221177	275563	280693	233590	237156	192593	403514	374322	337862	255367	320610
Q9D832	DnaJ homolog subfamily B member 4 [OS=Mus musculus]	Dnajb4	2.00096e+06	1.81081e+06	1.69558e+06	1.75557e+06	1.51975e+06	1.49494e+06	1.67453e+06	1.65173e+06	1.62532e+06	1.89807e+06	1.78825e+06	2.25322e+06
P63024	Vesicle-associated membrane protein 3 [OS=Mus musculus]	Vamp3	803285	920789	986773	723619	899925	1.20024e+06	354452	715861	812551	806378	361706	847501
Q9Z0G0	PDZ domain-containing protein GIPC1 [OS=Mus musculus]	Gipc1	7.52397e+06	6.50348e+06	7.88157e+06	6.06401e+06	5.1086e+06	5.0228e+06	4.91278e+06	4.78188e+06	6.51394e+06	4.86013e+06	7.70927e+06	4.76735e+06
Q01339	Beta-2-glycoprotein 1 [OS=Mus musculus]	Apoh	5.01466e+06	5.05023e+06	4.66399e+06	4.32646e+06	5.09622e+06	4.97648e+06	5.58679e+06	4.05821e+06	1.51345e+06	1.75448e+06	2.03593e+06	2.15103e+06
Q9CYG7	Mitochondrial import receptor subunit TOM34 [OS=Mus musculus]	Tomm34	1.02033e+07	2.69968e+07	1.18531e+07	1.16488e+07	1.15076e+07	1.71274e+07	2.96337e+07	1.25404e+07	1.17336e+07	1.43183e+07	1.40722e+07	9.84504e+06
P56371	Ras-related protein Rab-4A [OS=Mus musculus]	Rab4a	950765	919987	1.29376e+06	1.1277e+06	896744	1.12509e+06	1.25296e+06	1.31182e+06	1.34069e+06	1.39553e+06	1.41181e+06	1.63068e+06
O70325	Phospholipid hydroperoxide glutathione peroxidase [OS=Mus musculus]	Gpx4	5.84818e+06	5.87309e+06	5.39274e+06	5.64672e+06	7.18896e+06	6.81331e+06	8442024	6.9286e+06	6.08949e+06	5.48322e+06	6.07685e+06	5.37185e+06
Q8K406	Leucine-rich repeat LGI family member 3 [OS=Mus musculus]	Lgi3	3.91581e+06	3.50968e+06	3.93331e+06	3.05451e+06	3.56849e+06	2.55661e+06	3196587	2.68004e+06	3.87607e+06	3.94939e+06	3.30824e+06	3.03697e+06
Q9Z2Y8	Pyridoxal phosphate homeostasis protein [OS=Mus musculus]	Plpbp	3.21161e+06	4.11801e+06	4.54933e+06	4.91428e+06	4.87962e+06	4.40341e+06	4.67032e+06	5.16754e+06	3.99164e+06	3.78116e+06	4.04608e+06	4.65259e+06
P56391	Cytochrome c oxidase subunit 6B1 [OS=Mus musculus]	Cox6b1	4.51261e+07	4.34573e+07	3.77321e+07	3.85775e+07	3.95437e+07	3.32167e+07	4.96668e+07	2.93374e+07	3.86173e+07	3.81451e+07	4.33093e+07	3.51896e+07
Q64433	10 kDa heat shock protein, mitochondrial [OS=Mus musculus]	Hspe1	4.07858e+07	4.22434e+07	4.06335e+07	4.27102e+07	3.75836e+07	3.95088e+07	3.81252e+07	3.77243e+07	3.68016e+07	4.95635e+07	46531409	4.31987e+07
A2ALU4	Protein Shroom2 [OS=Mus musculus]	Shroom2	1.24411e+06	840020	1.06098e+06	894252	1.17952e+06	1.13097e+06	1.15283e+06	795443	1.34676e+06	1.37191e+06	1.19339e+06	1.29389e+06
Q61239	Protein farnesyltransferase/geranylgeranyltransferase type-1 subunit alpha [OS=Mus musculus]	Fnta	302886	237042	295536	256883	197607	274682	161362	285057	436649	333796	257511	346978
Q8BQZ4	Ral GTPase-activating protein subunit beta [OS=Mus musculus]	Ralgapb	301723	495996	328665	463838	363341	268675	320667	426567	1.37666e+06	814696	350141	1.0273e+06
O88602	Voltage-dependent calcium channel gamma-2 subunit [OS=Mus musculus]	Cacng2	1.0907e+06	1.09067e+06	1.57332e+06	1.59458e+06	1.45444e+06	933561	1.39207e+06	1.75197e+06	930711	694796	1.26114e+06	1.07855e+06
Q9R1C6	Diacylglycerol kinase epsilon [OS=Mus musculus]	Dgke	1.43894e+06	1.38884e+06	1.4722e+06	1.48441e+06	1.69387e+06	1.47847e+06	1.51806e+06	1.81709e+06	1.71145e+06	1.64693e+06	1.55917e+06	1.32675e+06
Q3UHX2	28 kDa heat- and acid-stable phosphoprotein [OS=Mus musculus]	Pdap1	2.02304e+06	2.39407e+06	2.49839e+06	2.5924e+06	2.38202e+06	4.20796e+06	2.30359e+06	2.31234e+06	2.47421e+06	2.85315e+06	2.73173e+06	2.24128e+06
Q62442	Vesicle-associated membrane protein 1 [OS=Mus musculus]	Vamp1	7.9089e+06	7.49056e+06	8.73061e+06	8.32142e+06	7.64639e+06	6.47857e+06	8.28196e+06	6.91148e+06	4.038e+06	4.40082e+06	4.73704e+06	4.4868e+06
O08808	Protein diaphanous homolog 1 [OS=Mus musculus]	Diaph1	252865	381653	230830	807188	239758	124222	213531	972683	426224	484709	551378	394948
P36536	GTP-binding protein SAR1a [OS=Mus musculus]	Sar1a	939705	606800	755058	775372	980157	1.14734e+06	906134	1.24451e+06	665408	781178	816812	942810
Q3TC72	Fumarylacetoacetate hydrolase domain-containing protein 2A [OS=Mus musculus]	Fahd2	1.68524e+06	2.0106e+06	1.0444e+06	1.07301e+06	1.75748e+06	1.51669e+06	1.76085e+06	2.11696e+06	1.7412e+06	1.83461e+06	2.60468e+06	1.9709e+06
Q9CZS1	Aldehyde dehydrogenase X, mitochondrial [OS=Mus musculus]	Aldh1b1	1.29913e+07	1.04126e+07	1.15978e+06	1.1561e+07	995730	1.1983e+07	1.8281e+07	9.51495e+06	1.00706e+06	9.92145e+06	1.81578e+06	8.69686e+06
O35344	Importin subunit alpha-4 [OS=Mus musculus]	Kpna3	1.08593e+06	1.0455e+06	900329	1.00272e+06	1.1032e+06	1.08573e+06	1.26542e+06	1.41184e+06	1.27765e+06	1.15652e+06	1.12171e+06	1.51048e+06
Q9WTS5	Teneurin-2 [OS=Mus musculus]	Tenm2	759416	1.08733e+06	702561	230422	556346	581250	653216	664803	1.30847e+06	1.33051e+06	976767	1.05824e+06
P35505	Fumarylacetoacetase [OS=Mus musculus]	Fah	1.11741e+06	1.2328e+06	1.35845e+06	1.32704e+06	1.20627e+06	1.54354e+06	1.15182e+06	1.36148e+06	1.49702e+06	1.75926e+06	1.89617e+06	1.43871e+06
P70333	Heterogeneous nuclear ribonucleoprotein H2 [OS=Mus musculus]	Hnrnph2	124204	97329.7			103769	81467.9	111751	163305		80240.2	103907
P59325	Eukaryotic translation initiation factor 5 [OS=Mus musculus]	Eif5	1.82903e+06	2.09444e+06	2.19975e+06	1.82942e+06	2.39833e+06	2.76238e+06	2.47682e+06	2.1412e+06	2.78758e+06	2.65936e+06	2.32044e+06	1.76417e+06
Q60714	Long-chain fatty acid transport protein 1 [OS=Mus musculus]	Slc27a1	776014	850104	725717	722658	712542	713069	624074	788667	712017	1.18172e+06	780317	918353
Q920P5	Adenylate kinase isoenzyme 5 [OS=Mus musculus]	Ak5	2.20813e+06	2.28936e+06	2.10193e+06	1.7584e+06	2.1709e+06	2.39624e+06	2.66693e+06	2.31621e+06	2.94876e+06	2.44904e+06	3.34012e+06	2.61133e+06
Q8C129	Leucyl-cystinyl aminopeptidase [OS=Mus musculus]	Lnpep	1.60764e+06	1.46826e+06	1.24909e+06	1.14394e+06	1.92147e+06	1.44726e+06	1.92816e+06	1.47714e+06	476910	995752	1.64377e+06	688705
P51432	1-phosphatidylinositol 4,5-bisphosphate phosphodiesterase beta-3 [OS=Mus musculus]	Plcb3	285461	302753	270339	243918	243190	78155	276065	372796	516156	408582	420535	198140
E9Q8I9	Protein furry homolog [OS=Mus musculus]	Fry	383192	153884	559499	341351	292529	251136	243801	434919	488493	623014	387206	488595
P05532	Mast/stem cell growth factor receptor Kit [OS=Mus musculus]	Kit	910217	1.34811e+06	1.13518e+06	286562	693678	1.04768e+06	812481	987794	1.73449e+06	1.75705e+06	1.53072e+06	1.50759e+06
Q80Z10	Astrotactin-2 [OS=Mus musculus]	Astn2	872598	929445	1.21338e+06	1.05073e+06	1.05246e+06	1.14647e+06	962737	940882	1.07624e+06	1.19715e+06	429725	914189
Q9ERS2	NADH dehydrogenase [ubiquinone] 1 alpha subcomplex subunit 13 [OS=Mus musculus]	Ndufa13	8.43313e+06	1.03771e+07	9.48479e+06	9.6906e+06	8.77685e+06	5.91234e+06	9.40578e+06	9.31262e+06	7.99122e+06	8.28031e+06	1.06605e+07	9.72459e+06
Q922E4	Ethanolamine-phosphate cytidylyltransferase [OS=Mus musculus]	Pcyt2	2.41144e+06	2.24488e+06	2.51057e+06	2.33819e+06	3.03494e+06	2.59025e+06	3.01464e+06	2.75233e+06	2.87577e+06	2.3665e+06	2.30873e+06	1.80888e+06
Q8BGR6	ADP-ribosylation factor-like protein 15 [OS=Mus musculus]	Arl15	5.82103e+06	4.8969e+06	5.15685e+06	4.88505e+06	5.3731e+06	5.78254e+06	4.7498e+06	5.2384e+06	6.20185e+06	5.716e+06	5.38042e+06	6.0698e+06
Q8BWG8	Beta-arrestin-1 [OS=Mus musculus]	Arrb1	2.08424e+06	2.62815e+06	1.98802e+06	2.56314e+06	2.59449e+06	2.18031e+06	2.99931e+06	2.55084e+06	2.42204e+06	2.22514e+06	2.17375e+06	2.00513e+06
Q61937	Nucleophosmin [OS=Mus musculus]	Npm1	1.42264e+06	1.83476e+06	1.28764e+06	1.6055e+06	807611	1.53624e+06	1.68957e+06	2.09761e+06	1.1285e+06	1.13901e+06	1.52442e+06	1.58673e+06
Q9EPR5	VPS10 domain-containing receptor SorCS2 [OS=Mus musculus]	Sorcs2	820467	1.02917e+06	1.21082e+06	1.21872e+06	1.21266e+06	1.29933e+06	1.47013e+06	1.65541e+06	1.58405e+06	1.46413e+06	986576	1.36882e+06
Q91YH5	Atlastin-3 [OS=Mus musculus]	Atl3	575569	258642	643759	241191	612659	395536	848385	393666	564681	504976	552100	467708
Q3UHC7	Disabled homolog 2-interacting protein [OS=Mus musculus]	Dab2ip	834721	915633	494609	639181	513828	626833	674879	602904	871854	735520	579691	507867
O35465	Peptidyl-prolyl cis-trans isomerase FKBP8 [OS=Mus musculus]	Fkbp8	1.46665e+06	1.39543e+06	1.32799e+06	1.63311e+06	1.56851e+06	1.41209e+06	1.67408e+06	1.62836e+06	1.47138e+06	1.14867e+06	1.59016e+06	1.36814e+06
Q99J99	3-mercaptopyruvate sulfurtransferase [OS=Mus musculus]	Mpst	1.71259e+06	2.26786e+06	1.48983e+06	1.9843e+06	1.21445e+06	1.33311e+06	1.44248e+06	1.89807e+06	1.83378e+06	1.79515e+06	2.24395e+06	2.13263e+06
Q91YD9	Neural Wiskott-Aldrich syndrome protein [OS=Mus musculus]	Wasl	1.67646e+06	1.90637e+06	2.11428e+06	1.76688e+06	2.34777e+06	1.97003e+06	1.81878e+06	1.86023e+06	2.12059e+06	2.04659e+06	2.69689e+06	2.28657e+06
P70202	Latexin [OS=Mus musculus]	Lxn	6.72693e+06	6.80211e+06	6.4586e+06	5.78845e+06	6.69304e+06	9.59792e+06	6.28894e+06	7.427e+06	1.02337e+07	9.59257e+06	9.22842e+06	8.75283e+06
P0C192	Leucine-rich repeat-containing protein 4B [OS=Mus musculus]	Lrrc4b	1.63413e+06	2.11635e+06	1.6454e+06	1.37379e+06	1.58766e+06	1.57061e+06	1.72447e+06	1.81384e+06	1.61401e+06	1.70377e+06	1.95999e+06	1.01298e+06
Q7M759	Alpha/beta hydrolase domain-containing protein 17B [OS=Mus musculus]	Abhd17b	1.19375e+06	1.09846e+06	1.24403e+06	1.27488e+06	1.10621e+06	769947	994905	1.0832e+06	1.42035e+06	1.38494e+06	1.18052e+06	1.81737e+06
Q64442	Sorbitol dehydrogenase [OS=Mus musculus]	Sord	1.41491e+06	1.48413e+06	1.33294e+06	1.61707e+06	1.84368e+06	2.97853e+06	2.02718e+06	1.5299e+06	1.45152e+06	1.8103e+06	1.72068e+06	1.32892e+06
Q3U7R1	Extended synaptotagmin-1 [OS=Mus musculus]	Esyt1	301576	238501	388739	307178	476496	316924	369653	450761	214593	246030	253345	109688
Q80W47	WD repeat domain phosphoinositide-interacting protein 2 [OS=Mus musculus]	Wipi2	992329	717282	459772	911791	937983	1.41789e+06	947440	934311	937733	1.24635e+06	738002	724124
Q8JZN5	Complex I assembly factor ACAD9, mitochondrial [OS=Mus musculus]	Acad9	707419	2.13552e+06	1.83879e+06	566205	877440	888489	424006	498074	449738	1.16785e+06	1.56629e+06	1.23272e+06
Q99LY9	NADH dehydrogenase [ubiquinone] iron-sulfur protein 5 [OS=Mus musculus]	Ndufs5	7.92013e+06	8.14364e+06	7.60251e+06	7.00559e+06	7.97752e+06	6.14907e+06	9.50943e+06	6.52341e+06	7.58843e+06	7.95386e+06	8.82087e+06	7.44113e+06
Q9R1P1	Proteasome subunit beta type-3 [OS=Mus musculus]	Psmb3	3.51303e+06	4.49475e+06	4.21709e+06	3.96952e+06	4.3528e+06	4.79151e+06	3.67495e+06	4.15691e+06	4.23881e+06	4.68067e+06	4.51045e+06	4.3311e+06
Q9CY27	Very-long-chain enoyl-CoA reductase [OS=Mus musculus]	Tecr	7.22402e+06	8.49515e+06	8.18469e+06	8.64027e+06	7.96635e+06	8.24207e+06	8.27118e+06	9.51243e+06	6.84456e+06	6.64285e+06	6.99226e+06	6.5545e+06
Q61418	H(+)/Cl(-) exchange transporter 4 [OS=Mus musculus]	Clcn4	1.19566e+06	1.38378e+06	861320	1.39508e+06	1.10064e+06	1.28489e+06	1.406e+06	994853	1.13361e+06	1.09361e+06	784165	1.30768e+06
Q9CQR6	Serine/threonine-protein phosphatase 6 catalytic subunit [OS=Mus musculus]	Ppp6c	1.3701e+06	1.47121e+06	1.53419e+06	1.25983e+06	1.3299e+06	1.33822e+06	1.60799e+06	1.9906e+06	1.70043e+06	1.36335e+06	1.61242e+06	1.35496e+06
Q99K70	Ras-related GTP-binding protein C [OS=Mus musculus]	Rragc	1.47077e+06	1.36848e+06	1.01735e+06	1.33333e+06	1.6818e+06	1.4997e+06	2.06136e+06	1.78435e+06	1.50258e+06	1.26606e+06	1.57953e+06	1.22923e+06
Q9DBR3	Armadillo repeat-containing protein 8 [OS=Mus musculus]	Armc8	380823	595270	318764	596854	335156	599139	338437	714202	1.57617e+06	489690	745745	954600
Q9D358	Low molecular weight phosphotyrosine protein phosphatase [OS=Mus musculus]	Acp1	1.41488e+07	1.1991e+07	1.34792e+07	1.53233e+07	1.34613e+07	1.69494e+07	1.3394e+07	1.14801e+07	7.14631e+06	5.87574e+06	5.19881e+06	1.26837e+07
P09055	Integrin beta-1 [OS=Mus musculus]	Itgb1	1.19913e+06	1.57977e+06	1.15541e+06	1.23803e+06	2.40626e+06	2.53878e+06	2.71779e+06	2.50817e+06	1.22722e+06	1.41309e+06	1.26416e+06	1.17941e+06
Q3UX10	Tubulin alpha chain-like 3 [OS=Mus musculus]	Tubal3	1.5986e+07	1.31373e+07	1.03137e+07	1.35325e+07	1.30864e+07	2.09016e+07	15009816	1.34115e+07	1.04596e+07	1.23724e+07	1.64277e+07	7.58177e+06
Q9JKC8	AP-3 complex subunit mu-1 [OS=Mus musculus]	Ap3m1	597665	240840	723343	641754	591235	456555	452139	780789	331801	501449	607582	744439
Q69Z26	Contactin-4 [OS=Mus musculus]	Cntn4	6.19498e+06	5.78098e+06	7.1012e+06	5.44434e+06	6.84546e+06	4.58116e+06	5.1902e+06	5.70933e+06	6.12123e+06	7.04048e+06	6.14635e+06	7.42285e+06
Q8K341	Alpha-tubulin N-acetyltransferase 1 [OS=Mus musculus]	Atat1	2.58878e+06	1.76186e+06	2.28076e+06	1.93945e+06	2.31984e+06	1.96295e+06	2.79975e+06	2.10557e+06	3.31158e+06	2.45867e+06	2.15285e+06	2.02545e+06
Q3UJU9	Regulator of microtubule dynamics protein 3 [OS=Mus musculus]	Rmdn3	1.11959e+06	953610	922830	1.30045e+06	1.01285e+06	915400	1.34392e+06	1.07851e+06	911806	1.14544e+06	1.15205e+06	1.40792e+06
Q9CZR8	Elongation factor Ts, mitochondrial [OS=Mus musculus]	Tsfm	1.91292e+06	1.99436e+06	1.69379e+06	2.59112e+06	1.82186e+06	1.81195e+06	2.24629e+06	1.92062e+06	1.92519e+06	2.18539e+06	2.75926e+06	1.95801e+06
O09126	Semaphorin-4D [OS=Mus musculus]	Sema4d	1.07573e+07	9.76445e+06	8.70092e+06	7.85076e+06	1.12516e+07	1.26827e+07	1.33027e+07	9.77988e+06	1.4517e+07	1.22652e+07	1.3265e+07	1.03569e+07
Q9JHI5	Isovaleryl-CoA dehydrogenase, mitochondrial [OS=Mus musculus]	Ivd	1.91358e+06	2.09312e+06	1.72428e+06	1.73771e+06	1.47034e+06	1.58501e+06	1.63251e+06	1.72611e+06	1.87297e+06	2.08416e+06	9.00417e+06	2.26696e+06
P54227	Stathmin [OS=Mus musculus]	Stmn1	1.56301e+07	1.50129e+07	1.65748e+07	1.79095e+07	2.09916e+07	1.86248e+07	1.64192e+07	1.21567e+07	1.37444e+07	1.40644e+07	9.03085e+06	1.77656e+07
Q9Z1Q2	Phosphatidylserine lipase ABHD16A [OS=Mus musculus]	Abhd16a	2.88764e+06	3.26028e+06	2.99717e+06	3.09892e+06	2.83141e+06	2.08158e+06	2.72407e+06	2.49995e+06	2.29007e+06	2.53263e+06	2.90081e+06	2.3613e+06
Q80ZJ6	Protein zer-1 homolog [OS=Mus musculus]	Zer1	2.83247e+06	3.34749e+06	3.85585e+06	4.4281e+06	2.94126e+06	1.7806e+06	2.26334e+06	6.02588e+06	3.86407e+06	4.07631e+06	3.36712e+06	1.07134e+07
Q9D906	Ubiquitin-like modifier-activating enzyme ATG7 [OS=Mus musculus]	Atg7	1.14349e+06	855597	1.10565e+06	1.08709e+06	857695	1.17208e+06	1.28098e+06	1.28393e+06	875800	587233	1.1551e+06	990962
O89116	Vesicle transport through interaction with t-SNAREs homolog 1A [OS=Mus musculus]	Vti1a	2.02901e+06	1.92713e+06	2.45326e+06	2.07854e+06	1.82719e+06	1.35776e+06	1.81748e+06	1.86506e+06	1.92855e+06	1.81273e+06	1.76585e+06	1.78527e+06
Q80Y17	Lethal(2) giant larvae protein homolog 1 [OS=Mus musculus]	Llgl1	2.1909e+06	923920	1.4426e+06	1.10799e+06	1.61027e+06	1.37081e+06	1.52351e+06	1.38947e+06	1.48845e+06	1.73224e+06	2.00493e+06	1.92618e+06
O88569	Heterogeneous nuclear ribonucleoproteins A2/B1 [OS=Mus musculus]	Hnrnpa2b1	2.15228e+06	3.20733e+06	1.89402e+06	2.53936e+06	1.39128e+06	1.07655e+06	3.39219e+06	2.97693e+06	702986	590584	1.5674e+06	1.09384e+06
Q99KH8	Serine/threonine-protein kinase 24 [OS=Mus musculus]	Stk24	4.19737e+06	5.3104e+06	4.5339e+06	4.60072e+06	4.64603e+06	4.74395e+06	5.17191e+06	4.3085e+06	3.7969e+06	3.6772e+06	5.85893e+06	4.73485e+06
Q9CRB8	Mitochondrial fission process protein 1 [OS=Mus musculus]	Mtfp1	1.03468e+06	1.6398e+06	1.30873e+06	1.48701e+06	1.42448e+06	923052	1.12894e+06	1.36902e+06	1.08983e+06	1.43526e+06	1.80566e+06	1.45784e+06
Q99P58	Ras-related protein Rab-27B [OS=Mus musculus]	Rab27b	2.03554e+06	2.19083e+06	2.59354e+06	2.15456e+06	1.954e+06	2.79806e+06	1.75631e+06	2.42439e+06	2.77986e+06	3.127e+06	2.70698e+06	2.52088e+06
Q9JI46	Diphosphoinositol polyphosphate phosphohydrolase 1 [OS=Mus musculus]	Nudt3	8.74411e+06	6.843e+06	7.35388e+06	6.99283e+06	8.73691e+06	9.74281e+06	8.92427e+06	6.37668e+06	7.45514e+06	6.12728e+06	7.8188e+06	5.78269e+06
Q04899	Cyclin-dependent kinase 18 [OS=Mus musculus]	Cdk18	661200	807810	791628	1.01077e+06	631742	824060	612099	1.04635e+06	1.14741e+06	805279	956509	1.31839e+06
P16045	Galectin-1 [OS=Mus musculus]	Lgals1	1.29187e+06	1.12444e+06	985897	867416	3.56444e+06	4.0132e+06	4.83539e+06	3.29554e+06	1.17895e+06	1.14754e+06	824118	630849
P55302	Alpha-2-macroglobulin receptor-associated protein [OS=Mus musculus]	Lrpap1	1.57174e+06	2.22466e+06	2.04141e+06	2.13848e+06	2.46249e+06	3.06667e+06	2.58657e+06	2.71789e+06	1.76027e+06	1.08296e+06	2.22921e+06	1.85419e+06
Q9D8B4	NADH dehydrogenase [ubiquinone] 1 alpha subcomplex subunit 11 [OS=Mus musculus]	Ndufa11	5.45804e+06	5.96436e+06	6.0469e+06	6.06802e+06	5.29814e+06	3.61001e+06	6.63917e+06	5.12822e+06	5.37617e+06	5.08538e+06	6.80488e+06	5.1039e+06
Q9Z0U1	Tight junction protein ZO-2 [OS=Mus musculus]	Tjp2	1.75744e+06	1.63486e+06	1.45926e+06	1.74738e+06	2.15879e+06	2.00883e+06	1.90228e+06	2.29799e+06	1.63225e+06	2.01991e+06	2.00753e+06	1.70571e+06
Q3TDD9	Protein phosphatase 1 regulatory subunit 21 [OS=Mus musculus]	Ppp1r21	1.12417e+06	1.09456e+06	903108	781743	1.02096e+06	1.01755e+06	695731	942075	1.15086e+06	1.25517e+06	1.17619e+06	1.11327e+06
Q9JM96	Cdc42 effector protein 4 [OS=Mus musculus]	Cdc42ep4	1.73841e+06	1.94717e+06	1.70094e+06	1.42066e+06	1.96599e+06	2.46837e+06	1.87316e+06	2.16295e+06	1.63524e+06	1.97055e+06	1.65495e+06	1.65314e+06
Q6RHR9	Membrane-associated guanylate kinase, WW and PDZ domain-containing protein 1 [OS=Mus musculus]	Magi1	1.74021e+06	1.30564e+06	1.53505e+06	1.48246e+06	1.46303e+06	1.05278e+06	1.71181e+06	1.53911e+06	1.88979e+06	1.77806e+06	1.90844e+06	1.61131e+06
P62702	40S ribosomal protein S4, X isoform [OS=Mus musculus]	Rps4x	1.79696e+06	2.37579e+06	2.04771e+06	2.25125e+06	3.0612e+06	2.79548e+06	2.96725e+06	2.55224e+06	1.75751e+06	1.83311e+06	2.36058e+06	2.71041e+06
Q8BK63	Casein kinase I isoform alpha [OS=Mus musculus]	Csnk1a1	1.14315e+06	1.23285e+06	1.33678e+06	1.77948e+06	1.47562e+06	2.09561e+06	1.89104e+06	1.39053e+06	1.47402e+06	1.26118e+06	1.31287e+06	1.86896e+06
P49442	Inositol polyphosphate 1-phosphatase [OS=Mus musculus]	Inpp1	1.67642e+06	1.48689e+06	1.42543e+06	1.8056e+06	1.87804e+06	1.98925e+06	2.16866e+06	2.32248e+06	2.54713e+06	2.35261e+06	2.19869e+06	2.22692e+06
Q9DAS9	Guanine nucleotide-binding protein G(I)/G(S)/G(O) subunit gamma-12 [OS=Mus musculus]	Gng12	2.15134e+07	15146523	1.64128e+07	1.47346e+07	1.66758e+07	1.12743e+07	1.59142e+07	1.26582e+07	1.28634e+07	2.14689e+07	1.60337e+07	1.88413e+07
P28741	Kinesin-like protein KIF3A [OS=Mus musculus]	Kif3a	789824	709847	648343	727429	712755	901846	643461	608395	1.17189e+06	1.02529e+06	1.12915e+06	736908
Q9WUL7	ADP-ribosylation factor-like protein 3 [OS=Mus musculus]	Arl3	3.9765e+06	4.17385e+06	2.80817e+06	3.50733e+06	4.17312e+06	5.32269e+06	3.98599e+06	4.39502e+06	4.29305e+06	4.47218e+06	4.25251e+06	3.73936e+06
Q8K4Z0	Leucine-rich repeat LGI family member 2 [OS=Mus musculus]	Lgi2	4.04669e+06	3.96633e+06	3.58769e+06	3.74776e+06	3.71842e+06	3.34029e+06	3.80855e+06	3.57651e+06	3.3903e+06	2.89302e+06	2.11296e+06	2.84971e+06
Q9D0L7	Armadillo repeat-containing protein 10 [OS=Mus musculus]	Armc10	1.61234e+06	1.44595e+06	1.23163e+06	1.5276e+06	1.53549e+06	1.36047e+06	1.60169e+06	1.10326e+06	1.4681e+06	1.75283e+06	2.22935e+06	1.69431e+06
Q3UTQ8	Cyclin-dependent kinase-like 5 [OS=Mus musculus]	Cdkl5	937740	804958	671566	610937	773098	191175	671496	415908	834711	515239	690110	645357
Q99JG2	G-protein coupled receptor 37-like 1 [OS=Mus musculus]	Gpr37l1	9.38013e+06	9.80162e+06	9.0101e+06	7.69991e+06	1.1587e+07	1.68482e+07	1.18617e+07	1.02895e+07	1.38692e+07	1.17408e+07	8.46576e+06	8.70138e+06
P12787	Cytochrome c oxidase subunit 5A, mitochondrial [OS=Mus musculus]	Cox5a	1.60635e+07	1.71444e+07	1.70795e+07	2.1788e+07	2.12401e+07	1.07233e+07	1.77041e+07	1.50799e+07	1.13468e+07	1.35591e+07	1.00734e+07	1.93876e+07
Q6PHU5	Sortilin [OS=Mus musculus]	Sort1	5.49335e+06	6.17085e+06	5.36027e+06	4.71131e+06	4.8363e+06	6.60783e+06	5.18591e+06	3.84132e+06	5.26789e+06	4.0754e+06	5.876e+06	4.41432e+06
Q9D2V7	Coronin-7 [OS=Mus musculus]	Coro7	183643	147359	152944	234861	186225	107039	204057	463159		96749.4	114144	132240
P10639	Thioredoxin [OS=Mus musculus]	Txn	1.62252e+07	1.10611e+07	1.3595e+07	8.90233e+06	1.66693e+07	1.49262e+07	1.67426e+07	1.16596e+07	1.67236e+07	1.01101e+07	1.65961e+07	9.4045e+06
P97765	WW domain-binding protein 2 [OS=Mus musculus]	Wbp2	1.86533e+07	2.09109e+07	2.64452e+07	2.1951e+07	1.99288e+07	2.68342e+07	2.40039e+07	2.44292e+07	2.10845e+07	2.01585e+07	2.51547e+07	2.23276e+07
Q8VCY8	Phospholipid phosphatase-related protein type 2 [OS=Mus musculus]	Plppr2	784767	528732	522362	245764	106110	917432	551872	461414	941092	643133	349398	752921
O54950	5'-AMP-activated protein kinase subunit gamma-1 [OS=Mus musculus]	Prkag1	142820	90742.6	289078	199887	331838	291037	323222	446188	176922	347679	255373	156886
P70188	Kinesin-associated protein 3 [OS=Mus musculus]	Kifap3	3.71683e+06	4.06691e+06	5.07764e+06	3.3416e+06	2.98984e+06	2.14892e+06	3.07488e+06	4.1158e+06	3.47656e+06	4.39985e+06	3.53898e+06	6.35474e+06
Q9CQI3	Glia maturation factor beta [OS=Mus musculus]	Gmfb	7.75066e+06	7.55076e+06	6.96959e+06	6.82449e+06	6.48372e+06	7.72072e+06	6.17207e+06	6.95007e+06	8.44308e+06	7.9759e+06	8.41225e+06	8.08389e+06
Q6GQS1	Calcium-binding mitochondrial carrier protein SCaMC-3 [OS=Mus musculus]	Slc25a23	8.28631e+06	1.19773e+07	1.6454e+07	1.27364e+07	1.07959e+07	1.07981e+07	1.03902e+07	1.20888e+07	3.04634e+06	3.18961e+06	2.51397e+06	2.0348e+06
Q9ER60	Sodium channel protein type 4 subunit alpha [OS=Mus musculus]	Scn4a
Q99JB2	Stomatin-like protein 2, mitochondrial [OS=Mus musculus]	Stoml2	751854	905036	794027	921094	533708	730810	868128	751277	766098	678910	930266	920873
P56376	Acylphosphatase-1 [OS=Mus musculus]	Acyp1	4.65824e+06	4.23227e+06	4.34482e+06	4.96446e+06	4.83846e+06	5.03541e+06	4.59106e+06	4.72018e+06	4.50828e+06	4.65755e+06	3.97003e+06	4.59179e+06
O35345	Importin subunit alpha-7 [OS=Mus musculus]	Kpna6	47586.8	37672.9	44562.8	37605.1	24883.7	63612	20765	69758.3	121223	68579.4	43115.4	91469.2
Q9CX56	26S proteasome non-ATPase regulatory subunit 8 [OS=Mus musculus]	Psmd8	3.04068e+06	2.67315e+06	2.72942e+06	2.99289e+06	3.18943e+06	2.82848e+06	2.83263e+06	3.44478e+06	3.40423e+06	2.7644e+06	2.71989e+06	2.70932e+06
Q8VBW6	NEDD8-activating enzyme E1 regulatory subunit [OS=Mus musculus]	Nae1	591040	703191	806636	836959	570315	927399	858968	737760	644839	744388	734895	743697
O70274	Protein tyrosine phosphatase type IVA 2 [OS=Mus musculus]	Ptp4a2		35352.9	39374.6	53875.2	42221.9	45611.4	56178.3			40073.3	44468.6
Q7TMS5	Broad substrate specificity ATP-binding cassette transporter ABCG2 [OS=Mus musculus]	Abcg2	1.65199e+06	1.47199e+06	1.66344e+06	1.06215e+06	1.5196e+06	1.70071e+06	1.18356e+06	1.12555e+06	1.64277e+06	1.56118e+06	1.32663e+06	1.24756e+06
Q6P069	Sorcin [OS=Mus musculus]	Sri	3.53447e+06	4.21714e+06	3.02778e+06	3.51477e+06	4.06744e+06	4.08741e+06	3.79427e+06	3.57493e+06	3.62094e+06	3.98133e+06	3.84923e+06	3.80279e+06
P63034	Cytohesin-2 [OS=Mus musculus]	Cyth2	3.03986e+06	2.99902e+06	2.55548e+06	2.84602e+06	2.88275e+06	2.77438e+06	2.99845e+06	3.01024e+06	3.00247e+06	3.4725e+06	3.02044e+06	3.25016e+06
Q9R0Q3	Transmembrane emp24 domain-containing protein 2 [OS=Mus musculus]	Tmed2	1.32844e+06	1.4849e+06	1.52466e+06	1.52862e+06	1.59283e+06	1.39283e+06	1.79753e+06	1.69999e+06	884346	1.05733e+06	1.43892e+06	1.14069e+06
Q61627	Glutamate receptor ionotropic, delta-1 [OS=Mus musculus]	Grid1	533694	483611	296526	462656	331724	252830	424667	144090	609819	662491	565396	629956
P63216	Guanine nucleotide-binding protein G(I)/G(S)/G(O) subunit gamma-3 [OS=Mus musculus]	Gng3	3.74186e+07	1.30969e+07	1.13556e+07	1.24844e+07	1.14911e+07	2.24525e+07	1.44812e+07	9.43401e+06	1.0511e+07	1.52063e+07	8.97431e+06	1.18207e+07
P35285	Ras-related protein Rab-22A [OS=Mus musculus]	Rab22a	5.95685e+06	5.78471e+06	4.36031e+06	5.72093e+06	4.91481e+06	4.7674e+06	4.94141e+06	4.71716e+06	4.24062e+06	4.83772e+06	4.78338e+06	4.92584e+06
Q80XA6	RalBP1-associated Eps domain-containing protein 2 [OS=Mus musculus]	Reps2	447349	499439	450208	684242	439630	820774	491458	500770	1.05713e+06	943062	701336	910256
O70340	Neuronal pentraxin-2 [OS=Mus musculus]	Nptx2	1.14325e+06	1.08607e+06	1.75264e+06	1.11405e+06	521898	555821	1.11624e+06	742990	61390.9	188845	307242	371126
Q9D1D4	Transmembrane emp24 domain-containing protein 10 [OS=Mus musculus]	Tmed10	2.58953e+06	2.33993e+06	2.18239e+06	2.87134e+06	2.23576e+06	2.23934e+06	3.01593e+06	2.6315e+06	1.69228e+06	1.64622e+06	2.55079e+06	2.05551e+06
Q8C561	G-protein coupled receptor-associated protein LMBRD2 [OS=Mus musculus]	Lmbrd2	1.00848e+06	1.28455e+06	1.18196e+06	1.13022e+06	1.12177e+06	880719	1.3475e+06	1.21735e+06	997801	991247	1.18767e+06	933255
Q922R1	Phagosome assembly factor 1 [OS=Mus musculus]	Phaf1	1.29546e+06	1.01323e+06	814108	852504	504345	725269	831030	896737	1.27339e+06	1.02827e+06	1.30982e+06	1.32522e+06
Q8JZR0	Long-chain-fatty-acid--CoA ligase 5 [OS=Mus musculus]	Acsl5	329988	417715	289776	575482	446600	405991	461991	583818	271899	155282	310942	512094
P97490	Adenylate cyclase type 8 [OS=Mus musculus]	Adcy8	105604	82408.8	97630	137570	96034.1			125099	428057	288110	232651	138657
P21614	Vitamin D-binding protein [OS=Mus musculus]	Gc	2.35812e+06	2.10328e+06	1.64865e+06	2.58998e+06	2.23605e+06	2.25915e+06	1.92124e+06	2.12763e+06	14595.8
Q9CX00	IST1 homolog [OS=Mus musculus]	Ist1	2.57923e+06	3.23482e+06	2.85975e+06	2.5911e+06	5.06991e+06	5.61096e+06	5.90547e+06	2.65611e+06	3.13289e+06	3.22952e+06	2.92637e+06	2.88639e+06
Q3V0K9	Plastin-1 [OS=Mus musculus]	Pls1	76261.6	84552.2	67669.6	102698	112134	86758.9	78666.9	106726	66339.1	67793.2	52435.7	99814.8
Q8C4X2	Casein kinase I isoform gamma-3 [OS=Mus musculus]	Csnk1g3	1.45087e+06	963705	1.24593e+06	1.58382e+06	1.15599e+06	1.28265e+06	737383	1.19369e+06	1.00705e+06	1.42952e+06	637907	1.41391e+06
Q922J6	Tetraspanin-2 [OS=Mus musculus]	Tspan2	9.78971e+06	8.59762e+06	8.03448e+06	8.33407e+06	1.18767e+07	9.45485e+06	1.09811e+07	6.32894e+06	6.42825e+06	9.89693e+06	7.07629e+06	6.37006e+06
Q62283	Tetraspanin-7 [OS=Mus musculus]	Tspan7	8.54016e+06	1.00426e+07	9.51483e+06	8.29805e+06	8.63643e+06	9.34965e+06	7.91331e+06	1.04992e+07	1.15209e+07	9.51587e+06	8.1141e+06	1.05152e+07
P61087	Ubiquitin-conjugating enzyme E2 K [OS=Mus musculus]	Ube2k	4.46832e+06	4.26408e+06	4.91904e+06	4.02703e+06	4.20532e+06	4.06279e+06	4.33427e+06	4.2775e+06	3.31052e+06	4.79133e+06	4.32779e+06	4.21851e+06
P63213	Guanine nucleotide-binding protein G(I)/G(S)/G(O) subunit gamma-2 [OS=Mus musculus]	Gng2	8.67952e+06	6.57186e+06	6.46361e+06	7.22785e+06	5.9917e+06	5.09871e+06	5.57029e+06	4.3086e+06	7.67316e+06	8.029e+06	6.24546e+06	6.51789e+06
Q9JJU8	SH3 domain-binding glutamic acid-rich-like protein [OS=Mus musculus]	Sh3bgrl	3.47669e+06	3.31533e+06	2.66906e+06	2.46634e+06	3.23979e+06	3.18317e+06	3.07131e+06	3.02954e+06	3.00265e+06	3.58047e+06	4.19562e+06	3.06937e+06
Q9D071	MMS19 nucleotide excision repair protein homolog [OS=Mus musculus]	Mms19	247460	203131	210777	249657	280758	191203	222042	373808	340332	219217	240372	228014
P08414	Calcium/calmodulin-dependent protein kinase type IV [OS=Mus musculus]	Camk4	1.64103e+06	1.27353e+06	2.16096e+06	1.6925e+06	1.53224e+06	1.3038e+06	1.69128e+06	662121	1.74936e+06	1.56198e+06	1.67132e+06	1.31071e+06
P17809	Solute carrier family 2, facilitated glucose transporter member 1 [OS=Mus musculus]	Slc2a1	6.1249e+06	6.05903e+06	6.6352e+06	5.74929e+06	7.06387e+06	6.59586e+06	6.70848e+06	6.08618e+06	6.60622e+06	6.51275e+06	6.71206e+06	6.281e+06
Q60770	Syntaxin-binding protein 3 [OS=Mus musculus]	Stxbp3	938805	671950	724687	646998	844799	947582	853361	1.00206e+06	887963	884793	875114	705187
P51906	Excitatory amino acid transporter 3 [OS=Mus musculus]	Slc1a1	3.64531e+06	2.43061e+06	2.41348e+06	2.50164e+06	1.51123e+06	1.7822e+06	1.77501e+06	1.80133e+06	5.49605e+06	3.12116e+06	2.71719e+06	2.55311e+06
P48024	Eukaryotic translation initiation factor 1 [OS=Mus musculus]	Eif1	4.08394e+06	4.03998e+06	4.35747e+06	4.02683e+06	4.50725e+06	5.06836e+06	4.85099e+06	3.76757e+06	4.41982e+06	3.9142e+06	3.87082e+06	3.16622e+06
Q7TMK9	Heterogeneous nuclear ribonucleoprotein Q [OS=Mus musculus]	Syncrip	2.18298e+06	3.07609e+06	2.59501e+06	2.25356e+06	2.46264e+06	2.99813e+06	2.9361e+06	2.79482e+06	1.69703e+06	1.61138e+06	1.64778e+06	962206
O35963	Ras-related protein Rab-33B [OS=Mus musculus]	Rab33b	1.79744e+06	1.7722e+06	1.12528e+06	1.80407e+06	1.16489e+06	1.9285e+06	1.66192e+06	1.55363e+06	1.73913e+06	2.01457e+06	1.1443e+06	1.8116e+06
Q8QZV4	Serine/threonine-protein kinase 32C [OS=Mus musculus]	Stk32c	3.76574e+06	3.45289e+06	4.45216e+06	4.02609e+06	2.9147e+06	4.05546e+06	2.87479e+06	4.49274e+06	2.60457e+06	3.15454e+06	3.60035e+06	3.55523e+06
P45878	Peptidyl-prolyl cis-trans isomerase FKBP2 [OS=Mus musculus]	Fkbp2	6.30613e+06	5.62684e+06	6.66125e+06	6.42591e+06	6.4725e+06	6.7564e+06	6.95286e+06	6.974e+06	7.21379e+06	5.50198e+06	7.13339e+06	5.96541e+06
Q9JKB1	Ubiquitin carboxyl-terminal hydrolase isozyme L3 [OS=Mus musculus]	Uchl3	3.44852e+06	3.91617e+06	2.18644e+06	2.93647e+06	3.3345e+06	2.64116e+06	2.91773e+06	2.24565e+06	2.81008e+06	3.76811e+06	1.71984e+06	3.30239e+06
O09111	NADH dehydrogenase [ubiquinone] 1 beta subcomplex subunit 11, mitochondrial [OS=Mus musculus]	Ndufb11	4.56462e+06	6.48586e+06	4.9633e+06	5.42604e+06	5.03051e+06	3.64034e+06	5.85701e+06	5.38354e+06	4.25908e+06	4.11924e+06	6.46714e+06	4.20623e+06
Q8C7R4	Ubiquitin-like modifier-activating enzyme 6 [OS=Mus musculus]	Uba6	388014	414968	328166	469515	386647	518194	466841	496527	457424	466616	448747	510352
Q8BR63	Protein FAM177A1 [OS=Mus musculus]	Fam177a1	2.2719e+06	1.89254e+06	1.62192e+06	1.5383e+06	2.28803e+06	1.85366e+06	1.95812e+06	1.38629e+06	1.57993e+06	1.39147e+06	1.48506e+06	1.14525e+06
Q8BRK8	5'-AMP-activated protein kinase catalytic subunit alpha-2 [OS=Mus musculus]	Prkaa2	627604	667350	859896	906336	763596	823343	902569	980955	859423	769080	611783	766745
P55288	Cadherin-11 [OS=Mus musculus]	Cdh11	1.78908e+06	2.04678e+06	1.72438e+06	1.54721e+06	1.51608e+06	2.07026e+06	1.37296e+06	1.38485e+06	1.84591e+06	2.27598e+06	1.54058e+06	1.7472e+06
P24472	Glutathione S-transferase A4 [OS=Mus musculus]	Gsta4	1.41051e+06	1.3216e+06	1.52059e+06	1.69421e+06	1.57301e+06	1.92263e+06	1.39669e+06	1.91752e+06	2.41465e+06	2.44722e+06	2.04014e+06	2.16724e+06
Q99KF1	Transmembrane emp24 domain-containing protein 9 [OS=Mus musculus]	Tmed9	8.49469e+06	9.50023e+06	9.34009e+06	7.46456e+06	8.07763e+06	8.11701e+06	8.49406e+06	8.4385e+06	7.81005e+06	8.20682e+06	8.49846e+06	9.31437e+06
Q80UY2	E3 ubiquitin-protein ligase KCMF1 [OS=Mus musculus]	Kcmf1	196372	168823	174367	218831	125001	156292	139611	236705	449035	287726	213524	281461
Q9D967	Magnesium-dependent phosphatase 1 [OS=Mus musculus]	Mdp1	476040	692478	1.11189e+06	1.31267e+06	1.17148e+06	1.46619e+06	1.01507e+06	1.1588e+06	831012	1.32932e+06	1.09452e+06	727544
Q8C878	NEDD8-activating enzyme E1 catalytic subunit [OS=Mus musculus]	Uba3	1.37552e+06	1.49319e+06	1.66691e+06	1.74236e+06	1.17266e+06	1.71977e+06	1.58771e+06	1.46771e+06	1.79405e+06	1.31236e+06	1.52863e+06	1.56331e+06
Q9D3D9	ATP synthase subunit delta, mitochondrial [OS=Mus musculus]	Atp5f1d	1.90454e+07	2.24265e+07	2.21578e+07	2.23201e+07	1.98929e+07	1.52459e+07	1.94023e+07	1.8147e+07	1.61174e+07	1.80464e+07	2.07447e+07	1.89001e+07
Q5HZI2	C2 calcium-dependent domain-containing protein 4C [OS=Mus musculus]	C2cd4c	390057	443094	372232	277817	274809	383777	393078	578036	604860	1.03639e+06	983151	1.11627e+06
Q9WUD1	E3 ubiquitin-protein ligase CHIP [OS=Mus musculus]	Stub1	1.74451e+06	1.35965e+06	1.51009e+06	1.46331e+06	2.01285e+06	2.09654e+06	1.79177e+06	1.70777e+06	2.14355e+06	1.79409e+06	1.97535e+06	1.76557e+06
Q8K4Z3	NAD(P)H-hydrate epimerase [OS=Mus musculus]	Naxe	3.06647e+06	540532	418278	3.27748e+06	3.88236e+06	731954	3.67778e+06	453948	823162	607514	4.31171e+06	789401
P70429	Ena/VASP-like protein [OS=Mus musculus]	Evl	524552	288932	439383	417520	677554	297426	632080	446698	798719	608579	704535	571226
Q6NZJ6	Eukaryotic translation initiation factor 4 gamma 1 [OS=Mus musculus]	Eif4g1	1.01579e+06	1.19916e+06	527493	761512	816536	591618	1.22743e+06	703944	788868	1.12673e+06	553152	840379
P68040	Receptor of activated protein C kinase 1 [OS=Mus musculus]	Rack1	3.38615e+06	1.36473e+06	1.23787e+06	1.2013e+06	1.68237e+06	3.5072e+06	1.73081e+06	1.31453e+06	936255	2.32611e+06	2.29979e+06	740141
Q9CPQ1	Cytochrome c oxidase subunit 6C [OS=Mus musculus]	Cox6c	2.80376e+07	3.26003e+07	3.28554e+07	3.37238e+07	3.0454e+07	2.50665e+07	3.22584e+07	3.18318e+07	2.4583e+07	2.62113e+07	3.23971e+07	2.57797e+07
Q62086	Serum paraoxonase/arylesterase 2 [OS=Mus musculus]	Pon2	507455	465964	730584	1.15953e+06	562030	306661	563871	1.2163e+06	368714	613984	272439	700995
P97372	Proteasome activator complex subunit 2 [OS=Mus musculus]	Psme2	123356	195305	253911	301923	242519	227899	300177	479752	365593	293737	274097	430828
Q9JLJ2	4-trimethylaminobutyraldehyde dehydrogenase [OS=Mus musculus]	Aldh9a1	1.31784e+06	1.56131e+06	1.66763e+06	1.56362e+06	1.67661e+06	2.07667e+06	2.0532e+06	1.73691e+06	1.54519e+06	1.97481e+06	1.89253e+06	1.65941e+06
Q9D8B7	Junctional adhesion molecule C [OS=Mus musculus]	Jam3	1.82758e+06	787025	1.37724e+06	1.40067e+06	2.12361e+06	1.82482e+06	2.21327e+06	840097	1.75434e+06	1.45342e+06	1.4304e+06	1.08202e+06
Q8C052	Microtubule-associated protein 1S [OS=Mus musculus]	Map1s	1.00719e+06	1.08753e+06	1.21958e+06	1.01522e+06	1.11015e+06	1.06321e+06	979917	1.15414e+06	1.50678e+06	1.07181e+06	1.41082e+06	1.36954e+06
P47740	Aldehyde dehydrogenase family 3 member A2 [OS=Mus musculus]	Aldh3a2	1.45412e+06	1.17182e+06	1.18459e+06	1.26581e+06	1.49864e+06	1.49965e+06	1.57874e+06	1.38323e+06	1.48009e+06	1.40815e+06	1.32354e+06	1.26986e+06
Q8BFQ8	Glutamine amidotransferase-like class 1 domain-containing protein 1 [OS=Mus musculus]	Gatd1	2.17013e+06	2.38292e+06	4.87238e+06	1.98494e+06	2.35869e+06	2.44016e+06	2.54961e+06	2.29516e+06	2.93398e+06	2.27377e+06	3.24358e+06	3.02667e+06
P50580	Proliferation-associated protein 2G4 [OS=Mus musculus]	Pa2g4	2.14631e+06	2.46698e+06	2.00368e+06	2.44184e+06	2.58113e+06	2.38119e+06	3.03441e+06	2.46913e+06	1.67507e+06	1.82648e+06	1.81618e+06	1.7417e+06
Q64520	Guanylate kinase [OS=Mus musculus]	Guk1	960283	1.21444e+06	1.20337e+06	975070	1.49324e+06	1.30552e+06	1.43226e+06	981058	1.34217e+06	1.09744e+06	1.39523e+06	1.14768e+06
Q9CQ92	Mitochondrial fission 1 protein [OS=Mus musculus]	Fis1	2.39343e+06	2.48881e+06	2.20981e+06	2.57227e+06	2.90468e+06	2.73042e+06	2.81264e+06	2.26139e+06	2.04194e+06	2.4837e+06	1.92909e+06	2.19552e+06
P57722	Poly(rC)-binding protein 3 [OS=Mus musculus]	Pcbp3	171012		160717	45309.5	299784	80035.9	252444	19554				76008.4
Q8C547	HEAT repeat-containing protein 5B [OS=Mus musculus]	Heatr5b	272910	285499	360188	413239	438525	214907	302122	451106	564396	438154	308876	664418
Q9Z2A0	3-phosphoinositide-dependent protein kinase 1 [OS=Mus musculus]	Pdpk1	1.1706e+06	906330	1.54612e+06	1.30064e+06	1.18541e+06	1.19333e+06	1325625	1.29996e+06	1.4102e+06	1.51779e+06	1.39766e+06	1.54128e+06
Q3TIR3	Synembryn-A [OS=Mus musculus]	Ric8a	1.87058e+06	1.29651e+06	997634	970915	1.15581e+06	2.4175e+06	2.02246e+06	1.29193e+06	2.74986e+06	2.75713e+06	1.72074e+06	1.07708e+06
P47941	Crk-like protein [OS=Mus musculus]	Crkl	1.63687e+06	1.75916e+06	2.02332e+06	1.61994e+06	1.9135e+06	1.81232e+06	1.76827e+06	1.8758e+06	2.4595e+06	1.76145e+06	2.10645e+06	1.96663e+06
Q99LB6	Methionine adenosyltransferase 2 subunit beta [OS=Mus musculus]	Mat2b	1.59001e+06	1.88955e+06	1.59454e+06	1.68456e+06	2.17409e+06	1.8239e+06	1.74667e+06	2.42083e+06	1.71122e+06	1.90534e+06	1.72807e+06	2.10771e+06
Q9CQ69	Cytochrome b-c1 complex subunit 8 [OS=Mus musculus]	Uqcrq	880480	2.12199e+06	954682	1.43603e+06	1.01389e+06	992439	1.19736e+06	2.75709e+06	1.41934e+06	1.54407e+06	1.60332e+06	3.14147e+06
Q14BB9	MAP6 domain-containing protein 1 [OS=Mus musculus]	Map6d1	1.88881e+06	1.74325e+06	1.66728e+06	1.64122e+06	2.04649e+06	1.54259e+06	1.93439e+06	1.70608e+06	1.29471e+06	1.34093e+06	1.56487e+06	1.55064e+06
Q9CQ22	Ragulator complex protein LAMTOR1 [OS=Mus musculus]	Lamtor1	1.7511e+06	1.87391e+06	1.75655e+06	2.37431e+06	2.44162e+06	1.36421e+06	2.28281e+06	1.78331e+06	1.54137e+06	1.58119e+06	2.02957e+06	1.63138e+06
Q810J8	Zinc finger FYVE domain-containing protein 1 [OS=Mus musculus]	Zfyve1	405723	393260	449603	432640	502008	438674	405747	513459	569878	452512	328489	553621
P61082	NEDD8-conjugating enzyme Ubc12 [OS=Mus musculus]	Ube2m	5.05882e+06	5.63345e+06	5.00698e+06	5.30869e+06	5.48182e+06	6.06716e+06	5.57217e+06	5.65993e+06	5.68495e+06	5.50994e+06	5.36757e+06	5.03606e+06
Q8BM65	Neuronal tyrosine-phosphorylated phosphoinositide-3-kinase adapter 2 [OS=Mus musculus]	Nyap2	573027	826230	651883	743969	459395	639433	576806	722760	708481	822290	835822	748529
Q9R0N3	Synaptotagmin-11 [OS=Mus musculus]	Syt11	1.93461e+06	1.84856e+06	1.35859e+06	1.15988e+06	2.16571e+06	2.10523e+06	2.46546e+06	2.19342e+06	1.0996e+06	794807	1.05882e+06	832408
Q62348	Translin [OS=Mus musculus]	Tsn	1.86068e+06	1.85862e+06	1.57449e+06	1.62757e+06	2.05682e+06	2.52065e+06	2.11584e+06	2.31593e+06	2.09708e+06	2.19415e+06	2.72024e+06	1.76918e+06
O35621	Phosphomannomutase 1 [OS=Mus musculus]	Pmm1	1.2476e+06	1.33289e+06	1.46685e+06	1.2571e+06	1.57711e+06	1.52889e+06	1.21413e+06	1.45003e+06	1.70064e+06	1.58453e+06	1.37409e+06	931172
Q9QXB9	Developmentally-regulated GTP-binding protein 2 [OS=Mus musculus]	Drg2	873092	1.05036e+06	875399	813802	955733	706185	758865	1.14947e+06	922560	985396	1.10511e+06	927981
P58871	182 kDa tankyrase-1-binding protein [OS=Mus musculus]	Tnks1bp1	334839	587974	352680	268639	579341	523810	427462	239645	409559	666172	522640	812165
Q8K0Y2	Keratin, type I cuticular Ha3-I [OS=Mus musculus]	Krt33a			39748.6	44584	106983			2.44721e+06		112035		115344
Q9WTR6	Cystine/glutamate transporter [OS=Mus musculus]	Slc7a11	991326	1.52932e+06	1.45647e+06	1.1891e+06	1.48735e+06	1.64824e+06	1.09292e+06	1.99189e+06	2.32015e+06	2.42154e+06	2.58427e+06	2.50522e+06
Q8R5L3	Vam6/Vps39-like protein [OS=Mus musculus]	Vps39	706373	436588	299806	409887	849713	596607	711295	624022	268461	445952	564123	350890
P57776	Elongation factor 1-delta [OS=Mus musculus]	Eef1d	1.25344e+06	1.49449e+06	1.18227e+06	1.17893e+06	2.01749e+06	1.74605e+06	1.82524e+06	1.70374e+06	1.62425e+06	1.51433e+06	1.446e+06	1.30589e+06
Q8VE70	Programmed cell death protein 10 [OS=Mus musculus]	Pdcd10	1.0457e+06	1.94896e+06	1.17246e+06	1.06271e+06	2.85078e+06	3.81578e+06	3.79809e+06	3.23667e+06	1.25734e+06	1.35208e+06	1.43669e+06	1.19939e+06
P59823	Interleukin-1 receptor accessory protein-like 1 [OS=Mus musculus]	Il1rapl1	3.06397e+06	2.62924e+06	2.68132e+06	2.73278e+06	2.62312e+06	3.25525e+06	2.75109e+06	2.31043e+06	3.01635e+06	2.8823e+06	2.57606e+06	2.42716e+06
Q8R3Q2	Serine/threonine-protein phosphatase 6 regulatory subunit 2 [OS=Mus musculus]	Ppp6r2	1.01937e+06	1.55434e+06	1.31957e+06	1.66047e+06	631149	339389	1.08335e+06	1.13006e+06	1.41832e+06	1.13523e+06	1.86446e+06	1.30937e+06
P57759	Endoplasmic reticulum resident protein 29 [OS=Mus musculus]	Erp29	1.37338e+06	1.26153e+06	938647	1.51446e+06	1.46315e+06	1.73977e+06	1.85172e+06	1.24821e+06	1.6464e+06	1.34243e+06	1.88227e+06	1.33711e+06
Q9DC16	Endoplasmic reticulum-Golgi intermediate compartment protein 1 [OS=Mus musculus]	Ergic1	2.10722e+06	1.9654e+06	1.50757e+06	1.80526e+06	1.94457e+06	1.24686e+06	2.13675e+06	1.69115e+06	900579	589691	1.2426e+06	1.08474e+06
Q6ZWX6	Eukaryotic translation initiation factor 2 subunit 1 [OS=Mus musculus]	Eif2s1	988240	1.76742e+06	2.22284e+06	1.7171e+06	1.46826e+06	2.50476e+06	2.7645e+06	2.26464e+06	2.00394e+06	2.09596e+06	1.9174e+06	1.95016e+06
Q64516	Glycerol kinase [OS=Mus musculus]	Gk	1.15659e+06	858244	915993	1.2054e+06	1.22279e+06	93738.3	944061	839518	354219	810004	1.11954e+06	844669
P83887	Tubulin gamma-1 chain [OS=Mus musculus]	Tubg1	711457	624781	615924	632847	620744	533570	520656	709961	894462	859394	905239	824008
P84309	Adenylate cyclase type 5 [OS=Mus musculus]	Adcy5	706966	516238	492853	849616	555821	626814	672698	902616	905288	693225	594952	728037
Q9JKD3	Secretory carrier-associated membrane protein 5 [OS=Mus musculus]	Scamp5	2.14508e+07	3.10088e+07	2.41697e+07	2.86181e+07	2.6956e+07	2.80558e+07	2.28543e+07	2.33146e+07	2.47262e+07	2.1204e+07	2.90242e+07	2.37454e+07
P70280	Vesicle-associated membrane protein 7 [OS=Mus musculus]	Vamp7	3.78917e+06	3.38431e+06	2.29776e+06	2.35153e+06	2.44608e+06	2.32174e+06	3.90573e+06	1.99891e+06	3.92382e+06	1.62739e+06	3.70442e+06	2.10003e+06
Q9CQH3	NADH dehydrogenase [ubiquinone] 1 beta subcomplex subunit 5, mitochondrial [OS=Mus musculus]	Ndufb5	7.54799e+06	8.46491e+06	8.29558e+06	1.08521e+07	7.88246e+06	5.0383e+06	7.36841e+06	7.36703e+06	5.51627e+06	6.44128e+06	8.84421e+06	8.83852e+06
P02535	Keratin, type I cytoskeletal 10 [OS=Mus musculus]	Krt10	1.37651e+07	1.76881e+06	9.96958e+06	7.25558e+06	6.23507e+06	9.30965e+06	9.88305e+06	9.28001e+06	9.00336e+06	7.67407e+06	4.87733e+06	8.83056e+06
Q08274	Dystrophia myotonica WD repeat-containing protein [OS=Mus musculus]	Dmwd	4.22211e+06	4.68402e+06	4.62512e+06	4.87846e+06	3.86228e+06	5.67708e+06	4.41161e+06	5.54633e+06	5.26641e+06	5.40069e+06	5.29797e+06	5.54419e+06
P12970	60S ribosomal protein L7a [OS=Mus musculus]	Rpl7a	4.00232e+06	3.83749e+06	4.61179e+06	4.09988e+06	4.83125e+06	4.28327e+06	5.42906e+06	4.53446e+06	4.52163e+06	3.57503e+06	4.63029e+06	3.22219e+06
Q8CHK3	Lysophospholipid acyltransferase 7 [OS=Mus musculus]	Mboat7	919586	893846	1.11396e+06	1.2326e+06	1.19534e+06	1.04009e+06	1.31672e+06	1.09938e+06	1.54691e+06	1.27879e+06	1.27964e+06	1.56752e+06
O35381	Acidic leucine-rich nuclear phosphoprotein 32 family member A [OS=Mus musculus]	Anp32a	1.40521e+07	1.19294e+07	1.18222e+07	1.30814e+07	1.33015e+07	1.17672e+07	1.27242e+07	1.18639e+07	1.39872e+07	12946076	1.50782e+07	1.43363e+07
Q9D880	Mitochondrial import inner membrane translocase subunit TIM50 [OS=Mus musculus]	Timm50	2.49885e+06	2.07112e+06	2245775	2.20063e+06	2.31112e+06	2.10723e+06	2.13265e+06	2.51708e+06	1.77221e+06	690554	2.04778e+06	1.80987e+06
Q9CY58	Plasminogen activator inhibitor 1 RNA-binding protein [OS=Mus musculus]	Serbp1	805313	482749	668370	515213	1.04821e+06	665510	1.02775e+06	524336	847103	399926	1.00883e+06	617132
P63030	Mitochondrial pyruvate carrier 1 [OS=Mus musculus]	Mpc1	502740	300911	438211	574763	197518	104361	141864	530446	844567	782794	411923	1.03727e+06
Q8VHL1	Histone-lysine N-methyltransferase SETD7 [OS=Mus musculus]	Setd7	2.73833e+06	2.07969e+06	1.92582e+06	2.44836e+06	2.83759e+06	2.59916e+06	2510547	3.18999e+06	2.20904e+06	2.3781e+06	2.58461e+06	2.84004e+06
Q2TBE6	Phosphatidylinositol 4-kinase type 2-alpha [OS=Mus musculus]	Pi4k2a	1.14723e+06	1.21496e+06	1.20995e+06	1.16701e+06	1.23498e+06	1.33907e+06	1.26725e+06	1.44134e+06	1.29174e+06	1.09917e+06	1.40167e+06	1.17353e+06
Q9QZS3	Protein numb homolog [OS=Mus musculus]	Numb	562204	549097	863574	796334	768167	626895	763179	455269	624115	534367	581200	719797
B1AY13	Ubiquitin carboxyl-terminal hydrolase 24 [OS=Mus musculus]	Usp24	46163.9	18544.8	36511.3	25570.3	12110.2		18569.3	56260.3	160378	129323	60553.8	126795
Q9WV32	Actin-related protein 2/3 complex subunit 1B [OS=Mus musculus]	Arpc1b	192255	69226.9				199109	127352	330069	108930	110643	149665	106562
Q9DBT5	AMP deaminase 2 [OS=Mus musculus]		2.38598e+06	2.63799e+06	2.09276e+06	2.40515e+06	2.1088e+06	1.9595e+06	2.64757e+06	2.19578e+06	1.81172e+06	1.80404e+06	2.35324e+06	2.05853e+06
Q80UU9	Membrane-associated progesterone receptor component 2 [OS=Mus musculus]	Pgrmc2	625895	689342	600529	763039	626741	881089	914865	646082	756398	818679	679209	829510
Q8CH72	E3 ubiquitin-protein ligase TRIM32 [OS=Mus musculus]	Trim32	1.49982e+06	1.0852e+06	859298	1.4109e+06	1.43531e+06	1.38493e+06	1.28187e+06	1.28953e+06	1.13441e+06	1.07921e+06	1.09072e+06	1.15042e+06
A2ASZ8	Calcium-binding mitochondrial carrier protein SCaMC-2 [OS=Mus musculus]	Slc25a25	1.42616e+06	1.38539e+06	1.17044e+06	1.13664e+06	1.31629e+06	386980	1.31608e+06	970990	883834	1.17967e+06	1.64436e+06	732558
Q9EPU5	Tumor necrosis factor receptor superfamily member 21 [OS=Mus musculus]	Tnfrsf21	262982	260560	172733	229172	206962	232736	203643	285401	212835	252916	193303	324809
Q9DBS1	Transmembrane protein 43 [OS=Mus musculus]	Tmem43	1.30013e+06	665815	830655	733578	1.47307e+06	1.01024e+06	1.8158e+06	1.42561e+06	879293	889821	918756	993681
P61971	Nuclear transport factor 2 [OS=Mus musculus]	Nutf2	2.32658e+06	2.49423e+06	1.55579e+06	2.90845e+06	2.64185e+06	1.66454e+06	1.98832e+06	3.2179e+06	1.9482e+06	3.20367e+06	1.22688e+06	2.82419e+06
Q9CQR4	Acyl-coenzyme A thioesterase 13 [OS=Mus musculus]	Acot13	4.3758e+06	5.25351e+06	5.76391e+06	4.77047e+06	4.46709e+06	3.25531e+06	5.33547e+06	4.70883e+06	3.77073e+06	3.69503e+06	5.33292e+06	4.9434e+06
P48542	G protein-activated inward rectifier potassium channel 2 [OS=Mus musculus]	Kcnj6	1.33153e+06	1.30482e+06	1.44314e+06	1.37137e+06	1.29673e+06	1.6675e+06	1.18167e+06	1.53695e+06	1.0044e+06	1.41397e+06	1.09092e+06	725975
Q99KQ4	Nicotinamide phosphoribosyltransferase [OS=Mus musculus]	Nampt	1.25141e+06	617271	761379	1.12101e+06	1.26265e+06	908714	1.11552e+06	277293	1.15098e+06	1.16017e+06	1.25475e+06	990537
Q9EPR4	Solute carrier family 23 member 2 [OS=Mus musculus]	Slc23a2	769466	736820	672033	922680	821792	513496	699182	1.10549e+06	862440	674121	543592	653821
Q8CCT4	Transcription elongation factor A protein-like 5 [OS=Mus musculus]	Tceal5	1.39438e+06	603821	1.14627e+06	646135	2.08719e+06	2.10096e+06	1.72522e+06	1.05525e+06	2.09172e+06	1.36444e+06	1.3964e+06	603473
Q6PEB6	MOB-like protein phocein [OS=Mus musculus]	Mob4	1.45644e+06	1.64878e+06	1.33216e+06	1.0059e+06	1.18928e+06	1.13653e+06	1.26571e+06	1.06232e+06	1.46924e+06	1.37582e+06	1.38365e+06	1.49424e+06
Q9R257	Heme-binding protein 1 [OS=Mus musculus]	Hebp1	1.1726e+06	1.9167e+06	1.56765e+06	1.14973e+06	1.93166e+06	1.75632e+06	1.56974e+06	1.70824e+06	1.81484e+06	1.96846e+06	1.66787e+06	1.49309e+06
Q9JL56	Glycerophosphodiester phosphodiesterase 1 [OS=Mus musculus]	Gde1	2.60318e+06	1.90356e+06	2.71907e+06	2.72627e+06	2.78468e+06	3.1483e+06	3.1984e+06	3.3554e+06	2.04522e+06	2.20413e+06	2.23354e+06	1.92277e+06
P25911	Tyrosine-protein kinase Lyn [OS=Mus musculus]	Lyn	154321		101870	133608	171150	286860	560987	543090		173329	139838	115216
Q68FE2	Autophagy-related protein 9A [OS=Mus musculus]	Atg9a	2.04171e+06	1.73858e+06	2.15301e+06	2.11389e+06	1.85575e+06	1.66815e+06	1.69792e+06	1.61441e+06	1.65352e+06	1.31817e+06	1.99407e+06	1.56547e+06
P99027	60S acidic ribosomal protein P2 [OS=Mus musculus]	Rplp2	3.78874e+06	5.10009e+06	4.47612e+06	4.26603e+06	5.17583e+06	4.04178e+06	4.2696e+06	3.64378e+06	3.67063e+06	3.3966e+06	3.74026e+06	3.96774e+06
P97950	Ras-related protein Rab-33A [OS=Mus musculus]	Rab33a	888386	843214	657080	974912	1.01377e+06	915899	1.31935e+06	1.04172e+06	1.16604e+06	869743	921828	1.14907e+06
P24668	Cation-dependent mannose-6-phosphate receptor [OS=Mus musculus]	M6pr	2.76834e+06	3.0669e+06	2.63492e+06	2.28302e+06	3.03535e+06	3.01599e+06	4.30813e+06	3.21025e+06	2.90967e+06	3.75919e+06	3.9937e+06	3.14145e+06
P20060	Beta-hexosaminidase subunit beta [OS=Mus musculus]	Hexb	1.86578e+06	825312	930206	1.06205e+06	2.19755e+06	2.34907e+06	2.5971e+06	2.67422e+06	656853	516726	830088	848955
P47743	Metabotropic glutamate receptor 8 [OS=Mus musculus]	Grm8	426725	181364	250769	262916	257339	194379	209961	195043	106233	570093	290565	285385
Q9JKZ2	Sodium/myo-inositol cotransporter [OS=Mus musculus]	Slc5a3	1.06599e+06	440715	672882	907869	1.24481e+06	1.00292e+06	1.02369e+06	1.73788e+06	1.3082e+06	1.15066e+06	1.14149e+06	1.07161e+06
Q8QZY1	Eukaryotic translation initiation factor 3 subunit L [OS=Mus musculus]	Eif3l	359083	490622	508066	541376	276908	42625.6	689922	820924	538688	448433	559703	596576
P35980	60S ribosomal protein L18 [OS=Mus musculus]	Rpl18	5.14072e+06	5.13951e+06	5.00572e+06	5.27246e+06	6.76801e+06	6.07987e+06	7.0211e+06	6.10623e+06	5.34688e+06	2.31149e+06	5.45022e+06	4.23509e+06
P97952	Sodium channel subunit beta-1 [OS=Mus musculus]	Scn1b	6.15497e+06	5.97625e+06	6.23396e+06	7.03665e+06	6.53683e+06	3.66803e+06	5.67922e+06	4.85588e+06	4.10521e+06	5.86568e+06	4.68191e+06	4.88881e+06
O35474	EGF-like repeat and discoidin I-like domain-containing protein 3 [OS=Mus musculus]	Edil3	2.50209e+06	2.2457e+06	1.82576e+06	2.42761e+06	2.70618e+06	2.05848e+06	3.14598e+06	3.22281e+06	943215	1.83382e+06	1.62715e+06	1.68243e+06
O08842	GDNF family receptor alpha-2 [OS=Mus musculus]	Gfra2	7.29446e+06	6.83644e+06	6.59564e+06	7.89853e+06	8.05804e+06	8.37435e+06	8.93805e+06	7.15327e+06	5.83244e+06	6.54852e+06	6.48574e+06	5.67573e+06
Q80V42	Carboxypeptidase M [OS=Mus musculus]	Cpm	1.22294e+06	1.18346e+06	1.16457e+06	1.42881e+06	1.90165e+06	1.0437e+06	1.19989e+06	1.32798e+06	1.14835e+06	1.16402e+06	1.164e+06	1.22194e+06
Q8C145	Zinc transporter ZIP6 [OS=Mus musculus]	Slc39a6	1.19063e+06	878742	953977	1.36282e+06	1.35944e+06	1.45665e+06	1.18571e+06	791348	1.74752e+06	2.09249e+06	2.11674e+06	851051
Q9CZX7	Type 2 phosphatidylinositol 4,5-bisphosphate 4-phosphatase [OS=Mus musculus]	Pip4p2	683493	542269	1.07811e+06	677864	742416	817653	1.11799e+06	524399	720727	647161	477589	398064
P56812	Programmed cell death protein 5 [OS=Mus musculus]	Pdcd5	1.31584e+06	1.6422e+06	1.62926e+06	1.86086e+06	1.57394e+06	1.73249e+06	1.55321e+06	1.39757e+06	1.94242e+06	2.46821e+06	2.00742e+06	2.07251e+06
Q810B6	Rabankyrin-5 [OS=Mus musculus]	Ankfy1	186484	246561	253451		216368		134938	225296	318675	459636	119270	283899
Q8K1X1	WD repeat-containing protein 11 [OS=Mus musculus]	Wdr11	572148	580874	502221	368839	423280	435803	658105	637408	499913	447317	670291	689230
Q61335	B-cell receptor-associated protein 31 [OS=Mus musculus]	Bcap31	2.20432e+06	2.17099e+06	2.64938e+06	2.28165e+06	2.61039e+06	2.19867e+06	2.47604e+06	2.50975e+06	2.38439e+06	2.08812e+06	2.10256e+06	2.03018e+06
Q8BRF7	Sec1 family domain-containing protein 1 [OS=Mus musculus]	Scfd1	1.30611e+06	944713	1.11936e+06	802423	1.42135e+06	1.43678e+06	1.71049e+06	1.5622e+06	1.45199e+06	1.26689e+06	1.20726e+06	1.33035e+06
P31786	Acyl-CoA-binding protein [OS=Mus musculus]	Dbi	6.87793e+06	6.8538e+06	5.92535e+06	6.19409e+06	8.76677e+06	9.22766e+06	6.92649e+06	5.81463e+06	7.05389e+06	7.7907e+06	6.70375e+06	9560329
Q8K4R4	Cytoplasmic phosphatidylinositol transfer protein 1 [OS=Mus musculus]	Pitpnc1	1.24657e+06	1.23274e+06	809117	1.55172e+06	1.25314e+06	1.40555e+06	1.16447e+06	1.28903e+06	914191	1.08806e+06	905702	647021
Q6P9R2	Serine/threonine-protein kinase OSR1 [OS=Mus musculus]	Oxsr1	1.42322e+06	1.28037e+06	1.07622e+06	1.33726e+06	1.23388e+06	1.44807e+06	1.32327e+06	1.4811e+06	1.52674e+06	1.19983e+06	1.54077e+06	1.23704e+06
Q3TYX3	Histone-lysine N-trimethyltransferase SMYD5 [OS=Mus musculus]	Smyd5	1.03974e+06	768997	1.3092e+06	899463	912152	741747	1.26903e+06	680315	1.12215e+06	1.63461e+06	1.03421e+06	754011
Q8BHW2	Protein OSCP1 [OS=Mus musculus]	Oscp1	602384	566408	334251	592580	300170	659953	515417	1.09875e+06	1.01101e+06	372874	696192	779441
Q8K0G5	EARP and GARP complex-interacting protein 1 [OS=Mus musculus]	Eipr1	2.00736e+06	3.20921e+06	2.01956e+06	1.93166e+06	2.24931e+06	2.20394e+06	2.01426e+06	2.32923e+06	2.2101e+06	2.2448e+06	2.12108e+06	2.1859e+06
Q8BXA0	Leucine-rich repeat and fibronectin type-III domain-containing protein 5 [OS=Mus musculus]	Lrfn5	420149	290473	329290	341902	384216	365963	335565	200066	200683	556182	278252
Q8CFV4	Neuritin [OS=Mus musculus]	Nrn1	1.20151e+07	1.00751e+07	9.13961e+06	1.07947e+07	9.05986e+06	1.34133e+07	1.26082e+07	7.66287e+06	1.04444e+07	9.64759e+06	1.0703e+07	8.75534e+06
Q91XF0	Pyridoxine-5'-phosphate oxidase [OS=Mus musculus]	Pnpo	1.24806e+06	1.22612e+06	1.03755e+06	1.03773e+06	490241	1.14377e+06	1.36456e+06	1.25815e+06	1.24967e+06	1.30212e+06	1.15887e+06	262026
P21460	Cystatin-C [OS=Mus musculus]	Cst3	3.35118e+06	3.16435e+06	2.40101e+06	2.2793e+06	4.50485e+06	5.8619e+06	5.98346e+06	4.43153e+06	3.21521e+06	3.41713e+06	3.05953e+06	2.63727e+06
Q9JLZ3	Methylglutaconyl-CoA hydratase, mitochondrial [OS=Mus musculus]	Auh	3.70176e+06	3.60917e+06	3.55194e+06	3.85511e+06	3.60269e+06	2.86185e+06	3.90579e+06	3.36804e+06	2.43026e+06	2.45872e+06	3.59874e+06	3.36669e+06
Q9Z0N1	Eukaryotic translation initiation factor 2 subunit 3, X-linked [OS=Mus musculus]	Eif2s3x	2.43444e+06	2.51834e+06	2.43392e+06	2.62727e+06	3.08016e+06	3.29965e+06	3.17037e+06	2.89674e+06	2.22755e+06	2.11009e+06	2.16589e+06	2.26137e+06
Q8K1X4	Nck-associated protein 1-like [OS=Mus musculus]	Nckap1l
Q923Z0	G-protein coupled receptor family C group 5 member B [OS=Mus musculus]	Gprc5b	3.09669e+06	3.49571e+06	3.58542e+06	3.10374e+06	3.45145e+06	3.81231e+06	2.91509e+06	3.11966e+06	2.86706e+06	3.76578e+06	2.50942e+06	2.88495e+06
P63040	Complexin-1 [OS=Mus musculus]	Cplx1	3.34606e+06	2.97027e+06	2.46858e+06	3.58502e+06	3.43082e+06	2.93928e+06	3.07665e+06	1.41312e+06	1.49004e+06	1.64408e+06	1.26001e+06	1.85168e+06
O55013	Trafficking protein particle complex subunit 3 [OS=Mus musculus]	Trappc3	3.16331e+06	4.78589e+06	4.47911e+06	4.69595e+06	3.3121e+06	2.78118e+06	2.89752e+06	2.94113e+06	2.61306e+06	3.23072e+06	3.40887e+06	3.11718e+06
Q9QXJ1	Amyloid beta precursor protein binding family B member 1 [OS=Mus musculus]	Apbb1	1.45225e+06	1.27433e+06	974796	1.26002e+06	1.28107e+06	990934	1.01135e+06	1.13019e+06	1.63089e+06	1.62122e+06	1.63946e+06	1.57879e+06
P47791	Glutathione reductase, mitochondrial [OS=Mus musculus]	Gsr	1.80385e+06	2.25143e+06	1.89991e+06	2.26855e+06	2.73232e+06	3.83591e+06	2.46712e+06	2.59132e+06	2.64817e+06	2.11882e+06	3.03445e+06	2.38405e+06
O55033	Cytoplasmic protein NCK2 [OS=Mus musculus]	Nck2	2.27393e+06	2.0754e+06	1.91096e+06	1.78052e+06	1.24159e+06	1.90122e+06	1.7477e+06	1.85636e+06	1.65375e+06	1.85507e+06	2.26041e+06	2.11398e+06
Q0VE82	Copine-7 [OS=Mus musculus]	Cpne7	318483	1.37421e+06	1.1614e+06	490262	550974	951767	617847	644436	1.53975e+06	1.8728e+06	1.9642e+06	1.68514e+06
P40237	CD82 antigen [OS=Mus musculus]	Cd82	3.82649e+06	2.49463e+06	3.02162e+06	2.41558e+06	4.74161e+06	3.40129e+06	4.65892e+06	2.8748e+06	1.92315e+06	2.46264e+06	2.14232e+06	1.90006e+06
P25444	40S ribosomal protein S2 [OS=Mus musculus]	Rps2	2.33992e+06	1.94019e+06	1.98366e+06	1.94856e+06	3.03628e+06	2.52982e+06	2.94146e+06	2.78022e+06	1.69817e+06	1.64262e+06	1.9396e+06	1.98358e+06
O35454	H(+)/Cl(-) exchange transporter 6 [OS=Mus musculus]	Clcn6	633556	864400	1.0895e+06	805258	971437	658079	470916	1.37804e+06	646054	845752	629970	877880
P97351	40S ribosomal protein S3a [OS=Mus musculus]	Rps3a	2.63576e+06	3.08982e+06	2.75824e+06	2.35671e+06	3.80255e+06	2.40929e+06	3.17066e+06	3.15752e+06	2.5173e+06	2.44097e+06	2.74803e+06	3.70084e+06
[truncated: 1,827 more rows]

## Sheet: Significant_D1 vs Sham_FDR<0.05
Accession	Protein name	Gene name	Student's T-test Significant D1_Sham	Student's T-test significant	-Log Student's T-test p-value D1_Sham	Student's T-test q-value D1_Sham	Student's T-test Difference D1_Sham	Fold change (D1 vs Sham)
[truncated: 139 more rows]

[truncated: 1 more sheets: Significant_D3 vs Sham_FDR<0.05]
